# Supplementary material for: Genetic loci and metabolic states associated with murine epigenetic aging
Source: eLife. 2022 Apr 7;11:e75244. doi: 10.7554/eLife.75244 (PMC9049972; doi:10.7554/eLife.75244)
Supplement: Supplementary file 1. [file elife-75244-supp1.xlsx]

## Sheet: Sheet1
Supplementary file 1. Individual-level sample information
			NIA Aging BXD colony information and traits																					Unbiased DNAm mouse clocks												Entropy						Strain-level summaries of lifespan							Genotypes at Eaaq11 and Eaaq19
			This ID is the individual identifier used in http://genenetwork.org				Age at BWF			BW0 measured	BW1 measured	BWF measured					Mice with negative values were first weighed before HFD; mice with positive values were first weighed after HFD	First body weight		Weight change from BW0 to BWF	Weight at time of tissue collection															27966CpGs; 20 bins	27966CpGs; 100 bins	27966CpGs; 2000 bins	5030 age-gain CpGs; 20 bins	1523 age-loss CpGs; 20 bins
Index	DNAmID	DNAmMicroarrayID	GN2AgingColonyID	IDFemaleAgingColony	Strain	Diet	Age (years)	Age (days)	DateOfBirth	DateInColony	DateOfBW1	DateOfDeath	DateOfHFDStart	Sex	AgeAtBW0 (days)	AgeAtHFDstart	AgeAtHFDstart-AgeAtBW0	BW0	BW1	deltaBW1	BWF	Serum fasting glucose (mmol/L)	Serum total cholesterol (mmol/L)	DNAmAge (pan)	EAA (pan)	DNAmAge (liver)	EAA (liver)	dev.DNAmAge (pan)	dev.EAA (pan)	dev.DNAmAge (liver)	dev.EAA (liver)	int.DNAmAge (pan)	int.EAA (pan)	int.DNAmAge (liver)	int.EAA (liver)	Entropy	Entropy_100Bins	Entropy_2000Bins	AgeGain_entropy20bin	AgeLoss_entropy20bin	AgeNS_entropy20bin	N(Lifespan)	minLS (years)	25Q-LS (years)	meanLS (years)	medianLS (years)	75Q-LS (years)	maxLS (years)	DA0014408.4 (Eaaq11)
1	UT1	202897220126_R01C01	H1228	FAC1070	B6D2F1	CD	1.98361	726	2013-02-03	2013-08-09	2013-10-02	2015-01-30		F	187			35.4	37.6	2.2	43.79	13	3.2	1.93116	0.0325421	1.82572	0.09605	1.57777	-0.181948	1.74918	-0.0572864	1.94989	0.0163263	1.65889	-0.0633398	2.72601	4.29835	7.25595	2.72523	2.52114	2.59672	7	2.31781	2.34521	2.5225	2.41096	2.71781	2.9589	Het
2	UT2	202897220126_R02C01	H1045	FAC887	BXD29	CD	1.97814	724	2013-02-05	2013-08-09	2013-10-02	2015-01-30		F	185			24.3	27.3	3	24.23	11.5	1.5	2.02139	0.127815	1.80774	0.0823319	1.75814	0.00302543	2.01148	0.209606	2.0389	0.110716	1.63551	-0.0820327	2.68256	4.25198	7.20827	2.71974	2.44685	2.54039	18	1.59178	2.02397	2.24444	2.16712	2.48219	3.42466	DD
3	UT4	202897220126_R04C01	H1769	FAC1312	BXD98	CD	1.04918	384	2014-01-11	2014-04-11	2014-05-14	2015-01-30		F	90			16.8	19.5	2.7	21.88	11.3	1.6	0.847953	-0.188101	1.01179	0.0116642	0.630416	-0.341421	0.961518	-0.0596287	1.0214	0.00785914	0.811416	-0.110177	2.71376	4.28609	7.24274	2.70377	2.47331	2.58352	12	1.08219	1.35411	1.70753	1.78904	2.06164	2.20822	BB
4	UT5	202897220126_R05C01	H2495	FAC2058	BXD32	CD	1.05464	386	2015-08-12	2016-01-14	2016-02-17	2016-09-01		F	155			25.4	28	2.6	34.53			1.24902	0.20792	1.01326	0.00887187	0.852938	-0.123506	1.02422	-0.0015223	1.10852	0.0895951	0.947775	0.0214995	2.68758	4.25691	7.21294	2.70582	2.46183	2.55584	12	1.77534	1.86164	2.1468	2.22055	2.36164	2.63836	DD
5	UT7	202897220126_R01C02	H1502	FAC1286	BXD44	HFD	1.03552	379	2014-01-16	2014-04-11	2014-05-14	2015-01-30	2014-04-11	F	85	85	0	17.4	27.1	9.7	50.46	13.7	1.2	1.20384	0.180402	0.79662	-0.192836	0.65977	-0.300548	0.806921	-0.202744	0.866294	-0.1338	0.938601	0.0287125	2.68361	4	7.20697	2.7099	2.44569	2.55293	<5							BB
6	UT8	202897220126_R02C02	H1860	FAC1491	BXD73	CD	2.07377	759	2014-08-04	2014-10-22	2014-11-10	2016-09-01		F	79			16.3	18.6	2.3	17.14			1.97628	-0.005568	1.61365	-0.186421	1.61073	-0.225014	1.50629	-0.37595	1.87212	-0.150215	1.22149	-0.577991	2.71997	4.29498	7.25377	2.77561	2.48308	2.57655	10	1.51507	1.61507	1.96986	1.93288	2.30068	2.38356	DD
7	UT9	202897220126_R03C02	H0675	FAC624	BXD39	CD	1.99454	730	2012-01-07	2012-07-23	2012-08-15	2014-01-06		F	198			28.3	28.8	0.5	20.2	5.4	0.9	1.74582	-0.162886	1.63579	-0.10242	1.16935	-0.599591	1.69197	-0.123677	1.90789	-0.0364395	1.58675	-0.144837	2.67266	4.24114	7.19658	2.76264	2.46625	2.51693	8	1.33973	1.77192	1.88253	1.99726	2.03014	2.03014	BB
8	UT10	202897220126_R04C02	H1096	FAC938	BXD90	CD	2	732	2013-01-28	2013-08-09	2013-10-02	2015-01-30		F	193			24.8	24.8	0	23.02	9	2.1	1.75625	-0.157501	1.78313	0.040662	1.6556	-0.117942	1.72978	-0.0904676	1.746	-0.203701	1.70235	-0.0339212	2.68968	4.25973	7.21803	2.72176	2.48777	2.54664	17	1.29041	1.8	2.02224	1.96438	2.26849	2.7863	BB
9	UT12	202897220126_R05C02	H2498	FAC2061	BXD87	CD	1.07377	393	2015-08-05	2016-01-14	2016-02-17	2016-09-01		F	162			20	21	1	20.64			1.07102	0.0122633	0.844044	-0.175277	0.646873	-0.345698	0.980375	-0.0614376	0.835584	-0.202172	0.7216	-0.221063	2.66859	4.23786	7.19281	2.63486	2.37267	2.54477	5	1.88767	2.01096	2.22301	2.16438	2.46438	2.74521	DD
10	UT13	202897220126_R06C02	H1200	FAC1042	BXD64	HFD	1	366	2013-04-22	2013-08-09	2013-10-02	2014-04-23	2013-08-08	F	109	108	1	26.6	38.7	12.1	59.23	9.2	3.5	1.22335	0.232696	1.11021	0.148482	0.68266	-0.247709	0.971498	-0.00831641	1.0447	0.0795751	0.977238	0.0977829	2.70309	4.27608	7.23334	2.67379	2.45936	2.58279	<5							DD
11	UT14	202894750008_R01C01	H1145	FAC987	DBA/2J	HFD	0.579235	212	2013-03-19	2013-08-09	2013-10-02	2013-10-17	2013-08-08	F	143	142	1	26.3	36.6	10.3	37.29	12.1	1.8	0.609903	0.00765307	0.536006	-0.0972078	0.506288	-0.0693027	0.504597	-0.121593	0.393072	-0.157774	0.406364	-0.112572	2.70109	4.27177	7.2305	2.66873	2.40572	2.58398	19	1.36986	1.60274	1.80058	1.85205	2.01918	2.23562	DD
12	UT17	202894750008_R02C01	H882	FAC819	BXD91	HFD	1.53552	562	2011-12-06	2012-07-23	2012-08-15	2013-06-20	2012-07-20	F	230	227	3	20.6	20	-0.6	35.27			1.6806	0.195605	1.28206	-0.0977741	1.51651	0.1346	1.30623	-0.123647	1.29125	-0.201139	1.37283	0.0345291	2.67518	4.24405	7.2016	2.67396	2.43103	2.53999	8	1.52329	2.18151	2.31473	2.33151	2.57055	2.87397	BB
13	UT18	202894750008_R03C01	H0884	FAC821	BXD91	CD	1.53552	562	2011-12-06	2012-07-23	2012-08-15	2013-06-20		F	230			23.5	23.8	0.3	25.7	12.3	1.6	1.54166	0.0566662	1.41132	0.0314849	1.48806	0.106154	1.44261	0.0127263	1.42765	-0.064738	1.41431	0.0760123	2.67809	4.24663	7.20425	2.70091	2.45428	2.536	7	1.70685	2.22466	2.53346	2.60274	2.91507	2.93699	BB
14	UT19	202894750008_R04C01	H0881	FAC818	BXD91	HFD	1.53552	562	2011-12-06	2012-07-23	2012-08-15	2013-06-20	2012-07-20	F	230	227	3	21.9	28	6.1	68.1	14.7	3.5	1.98929	0.504297	1.61549	0.235665	1.90808	0.526174	1.64747	0.217587	1.45678	-0.035601	1.8357	0.4974	2.69003	4.26288	7.2204	2.69448	2.49976	2.55082	8	1.52329	2.18151	2.31473	2.33151	2.57055	2.87397	BB
15	UT20	202894750008_R05C01	H0883	FAC820	BXD91	CD	1.53552	562	2011-12-06	2012-07-23	2012-08-15	2013-06-20		F	230			22.5	22.8	0.3	29.26	8.6	1.2	1.93091	0.445925	1.46403	0.0841983	1.82914	0.447234	1.48045	0.050568	1.4943	0.00191285	1.54459	0.206291	2.66966	4.23786	7.19531	2.67947	2.45253	2.52753	7	1.70685	2.22466	2.53346	2.60274	2.91507	2.93699	BB
16	UT22	202894750008_R06C01	H0807	FAC745	BXD65	CD	1.94262	711	2011-11-04	2012-07-23	2012-08-15	2013-10-15		F	262			28.2	30.4	2.2	26.42	7.9	1.2	2.3095	0.448716	1.93783	0.24015	1.93514	0.209974	1.92911	0.157084	2.21347	0.320258	1.78951	0.102404	2.67988	4.24773	7.20404	2.72754	2.4698	2.53775	11	2.1863	2.27671	2.39751	2.45479	2.54247	2.56986	DD
17	UT23	202894750008_R01C02	H0808	FAC746	BXD65	CD	1.94262	711	2011-11-04	2012-07-23	2012-08-15	2013-10-15		F	262			36	38.5	2.5	32.48	11.8	1.6	2.47175	0.610967	1.97522	0.277547	1.86574	0.14057	1.97872	0.206699	2.27049	0.377281	1.86757	0.180456	2.70155	4.26962	7.22662	2.71713	2.49024	2.5691	11	2.1863	2.27671	2.39751	2.45479	2.54247	2.56986	DD
18	UT25	202894750008_R02C02	H1284	FAC1118	BXD65	CD	1.00273	367	2013-01-04	2013-08-09	2013-10-02	2014-01-06		F	217			35.5	38.4	2.9	40.71	14.8	2.3	1.30705	0.313876	1.0279	0.064041	0.914155	-0.0185175	0.980574	-0.00153619	0.9308	-0.0370134	0.87742	-0.00437585	2.69014	4.26033	7.21657	2.65651	2.44211	2.56475	11	2.1863	2.27671	2.39751	2.45479	2.54247	2.56986	DD
19	UT28	202894750008_R03C02	H0267	FAC248	BXD73b	CD	1.03005	377	2011-08-26	2011-11-15	2012-03-26	2012-09-06		F	81			20.2	26.3	6.1	32.3	8	0.7	0.934402	-0.0839971	0.811082	-0.174108	0.63228	-0.32343	0.736661	-0.268412	0.854859	-0.139855	0.57871	-0.326497	2.67836	4.24695	7.20533	2.67216	2.38247	2.54657	16	1.79726	2.00137	2.2536	2.24658	2.54384	2.88493	DD
20	UT32	202894750008_R04C02	H1283	FAC1117	BXD65	CD	1.00273	367	2013-01-04	2013-08-09	2013-10-02	2014-01-06		F	217			31	33	2	33.63	13.3	2.2	1.29346	0.30028	1.02502	0.0611572	0.900755	-0.0319179	0.917292	-0.0648179	1.06284	0.0950238	0.871138	-0.0106575	2.68617	4.25498	7.21418	2.6628	2.43804	2.55636	11	2.1863	2.27671	2.39751	2.45479	2.54247	2.56986	DD
21	UT33	202894750008_R05C02	H1197	FAC1039	BXD73b	HFD	1.05191	385	2012-12-17	2013-08-09	2013-10-02	2014-01-06	2013-08-08	F	235	234	1	27.9	38.6	10.7	41.33	8.3	2.6	1.07128	0.0327037	1.02397	0.0217141	0.863215	-0.110925	0.8193	-0.204143	0.850011	-0.166224	0.726105	-0.197829	2.68089	4.25104	7.20881	2.70553	2.42794	2.54099	21	1.3589	1.73425	2.1028	2.19726	2.43836	2.60548	DD
22	UT34	202894750008_R06C02	H1198	FAC1040	BXD73b	HFD	1.05191	385	2012-12-17	2013-08-09	2013-10-02	2014-01-06	2013-08-08	F	235	234	1	21.6	30.3	8.7	35.03	4.8	1.3	1.06728	0.028702	0.819173	-0.183083	0.645447	-0.328693	0.657337	-0.366106	1.06478	0.0485413	0.691633	-0.232301	2.68189	4.25365	7.21188	2.69064	2.39872	2.54596	21	1.3589	1.73425	2.1028	2.19726	2.43836	2.60548	DD
23	UT36	202894750041_R01C01	H0832	FAC769	BXD79	CD	1.55738	570	2011-11-27	2012-07-23	2012-08-15	2013-06-19		F	239			32.4	33.7	1.3	35.51	14.3	1.6	1.91094	0.405777	1.59784	0.200949	1.39151	-0.00882687	1.6143	0.16605	1.62387	0.109969	1.77363	0.416609	2.71413	4.28798	7.24594	2.71427	2.46986	2.58545	8	1.23014	1.43082	1.55103	1.55479	1.63767	1.92603	DD
24	UT37	202894750041_R02C01	H0831	FAC768	BXD79	CD	1.55738	570	2011-11-27	2012-07-23	2012-08-15	2013-06-19		F	239			33.1	24.7	-8.4	24.73	4.1	1.2	1.7048	0.199635	1.6616	0.264702	1.19242	-0.207915	1.70962	0.261366	1.35765	-0.156257	1.61707	0.260047	2.69421	4.26603	7.2249	2.74367	2.51696	2.55423	8	1.23014	1.43082	1.55103	1.55479	1.63767	1.92603	DD
25	UT44	202894750041_R03C01	H0824	FAC761	BXD79	CD	1.03279	378	2012-01-31	2012-07-20	2012-08-15	2013-02-12		F	171			25.9	28.1	2.2	31.24	11.9	1.6	1.03444	0.0135168	1.14168	0.154358	0.789959	-0.168056	1.08755	0.0801829	0.936863	-0.0605415	1.17879	0.271239	2.68229	4.25311	7.20867	2.6603	2.41116	2.55292	8	1.23014	1.43082	1.55103	1.55479	1.63767	1.92603	DD
26	UT46	202894750041_R04C01	H0826	FAC763	BXD79	CD	1.03279	378	2012-01-31	2012-07-20	2012-08-15	2013-02-12		F	171			23.3	26.3	3	30.76	11.4	1.5	1.03116	0.0102418	1.12928	0.14196	0.753352	-0.204662	1.06871	0.0613454	0.928791	-0.0686129	1.11484	0.207293	2.68006	4.25261	7.2114	2.65086	2.42014	2.55219	8	1.23014	1.43082	1.55103	1.55479	1.63767	1.92603	DD
27	UT51	202894750041_R05C01	H0005	FAC005	BXD48	CD	1.10656	405	2011-03-31	2011-10-25	2012-03-26	2012-05-09		F	208			27.4	23.1	-4.3	21.11	8.7	2.5	1.08667	-0.00235266	0.766482	-0.278438	0.669137	-0.351079	0.849995	-0.219373	0.863419	-0.206618	0.636214	-0.334541	2.66407	4.23322	7.18941	2.72762	2.42032	2.52258	10	1.4137	1.75137	1.96603	1.95479	2.15959	2.59726	BB
28	UT54	202894750041_R06C01	H0211	FAC193	BXD48a	CD	0.636612	233	2011-09-21	2011-11-15	2012-03-26	2012-05-11		F	55			25.6	26.1	0.5	27.08	11.3	1.5	0.756496	0.101281	0.564675	-0.113335	0.446358	-0.177611	0.514706	-0.159705	0.499059	-0.108278	0.414618	-0.153479	2.67388	4.24528	7.2006	2.63235	2.39127	2.55293	17	1.18904	1.63425	1.85189	1.88767	2.06986	2.4137	BB
29	UT55	202894750041_R01C02	H1862	FAC1493	BXD73	HFD	0.70765	259	2014-08-04	2014-10-22	2014-11-10	2015-04-20	2014-10-22	F	79	79	0	16.7	19.4	2.7	23.8	22.4	2	0.821695	0.100906	0.588883	-0.14459	0.553674	-0.130193	0.50528	-0.228834	0.621308	-0.0559727	0.422993	-0.205972	2.67248	4.24273	7.20128	2.66581	2.34642	2.5447	12	1.31507	1.80068	1.92694	1.96712	2.11644	2.43562	DD
30	UT57	202894750041_R02C02	H0209	FAC191	BXD48a	CD	0.636612	233	2011-09-21	2011-11-15	2012-03-26	2012-05-11		F	55			28.8	29.9	1.1	31.65	12.1	2	0.731707	0.076492	0.539676	-0.138335	0.448581	-0.175388	0.504245	-0.170167	0.537188	-0.0701493	0.400684	-0.167413	2.68293	4.25586	7.21395	2.66345	2.41716	2.55625	17	1.18904	1.63425	1.85189	1.88767	2.06986	2.4137	BB
31	UT59	202894750041_R03C02	H0004	FAC004	BXD48	CD	1.10656	405	2011-03-31	2011-10-25	2012-03-26	2012-05-09		F	208			23.9	24.2	0.3	22.28	6.8	1.8	0.880387	-0.208632	0.824149	-0.22077	0.537817	-0.482399	0.912621	-0.156747	0.664641	-0.405396	0.620628	-0.350128	2.66702	4.23648	7.19669	2.70103	2.40877	2.53151	10	1.4137	1.75137	1.96603	1.95479	2.15959	2.59726	BB
32	UT60	202894750041_R04C02	H0823	FAC760	BXD79	CD	0.592896	217	2012-01-31	2012-07-20	2012-08-15	2012-09-04		F	171			23.9	25.3	1.4	25.8	13.6	1.5	0.597302	-0.0175586	0.668627	0.0247474	0.434872	-0.152237	0.637024	-0.000647631	0.42614	-0.138156	0.72301	0.192369	2.68743	4.26059	7.21793	2.63724	2.39741	2.56101	8	1.23014	1.43082	1.55103	1.55479	1.63767	1.92603	DD
33	UT62	202894750041_R05C02	H0365	FAC342	BXD9	CD	0.95082	348	2011-09-22	2011-12-13	2012-03-26	2012-09-04		F	82			43.5	45.9	2.4	49.3	15.1	3.4	0.953399	0.00814128	1.06149	0.138167	0.694938	-0.193963	1.34754	0.409059	0.975726	0.0590255	0.88657	0.0492541	2.69017	4.26409	7.22328	2.66887	2.46554	2.55937	21	0.923288	1.18082	1.39035	1.26575	1.56986	2.61918	DD
34	UT71	202894750041_R06C02	H1504	FAC1288	BXD44	CD	1.03552	379	2014-01-16	2014-04-11	2014-05-14	2015-01-30		F	85			17.3	19.3	2	24.08	14.2	2.1	0.987755	-0.0356879	0.886326	-0.103131	0.57087	-0.389448	0.726618	-0.283047	0.842003	-0.158092	0.943783	0.0338943	2.67765	4.25011	7.20739	2.65008	2.4087	2.55373	<5							BB
35	UT72	202897220066_R01C01	H1447	FAC1228	BXD73	HFD	0.986339	361	2013-12-19	2014-04-11	2014-05-13	2014-12-15	2014-04-11	F	113	113	0	18.1	22.3	4.2	31.99	11.1	1.7	1.29974	0.321694	0.847403	-0.103656	0.809925	-0.108925	0.860473	-0.107859	1.2904	0.338723	0.717259	-0.150491	2.70851	4.27963	7.23926	2.69472	2.36565	2.59304	12	1.31507	1.80068	1.92694	1.96712	2.11644	2.43562	DD
36	UT74	202897220066_R02C01	H1450	FAC1231	BXD73	CD	0.986339	361	2013-12-19	2014-04-11	2014-05-14	2014-12-15		F	113			19.1	21.4	2.3	24.14	4.1	0.6	1.12463	0.146588	0.877914	-0.0731453	0.897297	-0.0215529	0.750447	-0.217886	0.944876	-0.00679625	0.653821	-0.213929	2.70143	4.27243	7.22834	2.72345	2.39963	2.57597	10	1.51507	1.61507	1.96986	1.93288	2.30068	2.38356	DD
37	UT76	202897220066_R03C01	H1412	FAC1193	BXD65b	CD	1.01093	370	2013-12-10	2014-04-11	2014-05-14	2014-12-15		F	122			19.6	25.8	6.2	29.68	11.1	2.3	1.15799	0.157241	1.13096	0.160706	1.02384	0.0842529	1.04216	0.0531572	1.1974	0.221513	0.960712	0.0718933	2.69115	4.26022	7.21714	2.68441	2.4183	2.57152	16	1.46849	1.94178	2.06524	2.08082	2.16918	2.79452	DD
38	UT77	202897220066_R04C01	H1451	FAC1232	BXD73	CD	0.986339	361	2013-12-19	2014-04-11	2014-05-14	2014-12-15		F	113			19	21.1	2.1	24.38	9.6	1.5	0.790827	-0.187218	0.822914	-0.128145	0.556448	-0.362402	0.655239	-0.313094	0.900431	-0.0512413	0.562008	-0.305742	2.69074	4.25967	7.21626	2.68933	2.36854	2.56752	10	1.51507	1.61507	1.96986	1.93288	2.30068	2.38356	DD
39	UT82	202897220066_R05C01	H1720	FAC1408	BXD65	CD	0.494536	181	2014-05-17	2014-07-25	2014-09-09	2014-11-14		F	69			19.6	22.9	3.3	24.56	12.6	2.5	0.640151	0.116087	0.59609	0.029005	0.455336	-0.0488376	0.539482	-0.0155245	0.45328	-0.0141719	0.502758	0.0563942	2.70429	4.27833	7.23597	2.65514	2.4057	2.59077	11	2.1863	2.27671	2.39751	2.45479	2.54247	2.56986	DD
40	UT88	202897220066_R06C01	H1429	FAC1210	BXD79	CD	1.28962	472	2014-01-14	2014-04-11	2014-05-14	2015-05-01		F	87			19.8	23.4	3.6	23.61	7.4	1.7	1.58272	0.324716	1.56211	0.374262	1.21968	0.0451099	1.35822	0.135001	0.810452	-0.439823	1.62509	0.497488	2.74706	4.32502	7.28458	2.80063	2.52919	2.61567	8	1.23014	1.43082	1.55103	1.55479	1.63767	1.92603	DD
41	UT103	202897220066_R01C02	H0229	FAC211	BXD102	CD	0.967213	354	2011-09-18	2011-11-15	2012-03-26	2012-09-06		F	58			23.4	23.8	0.4	28.6	15.8	2.3	0.904852	-0.0555382	0.925665	-0.0104617	0.778035	-0.124689	1.0043	0.0520376	0.792034	-0.140808	0.874241	0.0228781	2.69872	4.26942	7.22587	2.63392	2.39842	2.58388	12	1.40822	2.00342	2.34566	2.29178	2.83014	3.09863	BB
42	UT104	202897220066_R02C02	H2098	FAC1638	BXD65	CD	0.606557	222	2014-09-10	2015-02-06	2015-03-11	2015-04-20		F	149			22.1	24.1	2	23.8	13.7	2.1	0.863205	0.235734	0.729483	0.0749373	0.730881	0.132253	0.746158	0.0970046	0.577752	5.66e-06	0.613755	0.0714093	2.69582	4.26779	7.22557	2.65306	2.39811	2.58087	11	2.1863	2.27671	2.39751	2.45479	2.54247	2.56986	DD
43	UT107	202897220066_R03C02	H0265	FAC246	BXD73b	CD	1.03005	377	2011-08-26	2011-11-15	2012-03-26	2012-09-06		F	81			22.2	25	2.8	23.9	6.7	0.5	0.898127	-0.120272	0.853902	-0.131288	0.70994	-0.245771	0.755519	-0.249554	1.01821	0.0234915	0.664897	-0.240309	2.69936	4.27082	7.23127	2.69033	2.38371	2.5779	16	1.79726	2.00137	2.2536	2.24658	2.54384	2.88493	DD
44	UT108	202897220066_R04C02	H0231	FAC213	BXD102	CD	0.967213	354	2011-09-18	2011-11-15	2012-03-26	2012-09-06		F	58			21.3	21.7	0.4	25.6	14.2	2	0.75673	-0.20366	0.780822	-0.155305	0.599971	-0.302753	0.808064	-0.144195	0.732957	-0.199885	0.81462	-0.0367425	2.68428	4.25279	7.21032	2.62088	2.37328	2.569	12	1.40822	2.00342	2.34566	2.29178	2.83014	3.09863	BB
45	UT109	202897220066_R05C02	H0183	FAC168	BXD73b	HFD	0.647541	237	2011-09-17	2011-11-14	2012-03-26	2012-05-11	2012-02-13	F	58	149	-91	21.4	32.6	11.2	37.48	8.8	2	0.65188	-0.013423	0.626815	-0.0597282	0.496172	-0.137012	0.527852	-0.155744	0.535389	-0.0827087	0.430203	-0.147259	2.69763	4.26977	7.2275	2.67022	2.38041	2.58183	21	1.3589	1.73425	2.1028	2.19726	2.43836	2.60548	DD
46	UT111	202897220066_R06C02	H0184	FAC169	BXD73b	CD	0.647541	237	2011-09-17	2011-11-14	2012-03-26	2012-05-11		F	58			18.6	22.3	3.7	25.75	13	1.3	0.536932	-0.128371	0.607439	-0.0791046	0.411787	-0.221397	0.464926	-0.218671	0.48988	-0.128218	0.397795	-0.179667	2.7081	4.28285	7.2395	2.65355	2.38339	2.59511	16	1.79726	2.00137	2.2536	2.24658	2.54384	2.88493	DD
47	UT112	202897220161_R01C01	H0181	FAC166	BXD73b	HFD	0.647541	237	2011-09-17	2011-11-14	2012-03-26	2012-05-11	2012-02-13	F	58	149	-91	18.5	28.2	9.7	26.83	8.8	2.4	0.610423	-0.05488	0.520686	-0.165857	0.538985	-0.0941995	0.458458	-0.225139	0.448537	-0.169561	0.318901	-0.258561	2.65697	4.21763	7.17465	2.6652	2.34778	2.5142	21	1.3589	1.73425	2.1028	2.19726	2.43836	2.60548	DD
48	UT120	202897220161_R03C01	H1364	FAC1179	BXD102	CD	0.5	183	2013-11-28	2014-01-13	2014-03-11	2014-05-30		F	46			14.1	18.4	4.3	20.34	14.7	1.7	0.372579	-0.156529	0.460479	-0.110872	0.450294	-0.0584869	0.436756	-0.122843	0.367258	-0.105574	0.347618	-0.103428	2.65166	4.20944	7.16772	2.61877	2.33311	2.51469	12	1.40822	2.00342	2.34566	2.29178	2.83014	3.09863	BB
49	UT124	202897220161_R04C01	H1363	FAC1178	BXD102	CD	0.5	183	2013-11-28	2014-01-13	2014-03-11	2014-05-30		F	46			14.4	18.9	4.5	20.23	10.2	1.1	0.430649	-0.0984596	0.466334	-0.105017	0.422002	-0.0867789	0.457482	-0.102116	0.327862	-0.14497	0.360345	-0.0907007	2.65659	4.21586	7.17256	2.64679	2.35375	2.5143	12	1.40822	2.00342	2.34566	2.29178	2.83014	3.09863	BB
50	UT127	202897220161_R05C01	H0450	FAC416	BXD102	CD	1.95082	714	2011-11-03	2011-12-14	2012-03-26	2013-10-17		F	41			18.8	23.8	5	24.95	9.5	2	1.5344	-0.333951	1.50364	-0.200438	1.36092	-0.371155	1.71566	-0.0632492	1.88192	-0.0193601	1.49654	-0.197599	2.65591	4.21628	7.17244	2.68566	2.4135	2.50591	12	1.40822	2.00342	2.34566	2.29178	2.83014	3.09863	BB
51	UT135	202897220161_R06C01	H0182	FAC167	BXD73b	CD	0.647541	237	2011-09-17	2011-11-14	2012-03-26	2012-05-11		F	58			19.6	21.3	1.7	22.71	6.9	1.3	0.668467	0.00316425	0.50531	-0.181234	0.592204	-0.0409805	0.445604	-0.237993	0.701503	0.0834047	0.319966	-0.257496	2.65723	4.22349	7.17946	2.67134	2.381	2.5107	16	1.79726	2.00137	2.2536	2.24658	2.54384	2.88493	DD
52	UT141	202897220161_R01C02	H1448	FAC1229	BXD73	HFD	0.986339	361	2013-12-19	2014-04-11	2014-05-13	2014-12-15	2014-04-11	F	113	113	0	19.4	22.9	3.5	31.01	11.3	1.1	1.17698	0.198933	0.844597	-0.106462	0.845393	-0.0734574	0.778766	-0.189566	0.947596	-0.00407598	0.585372	-0.282378	2.64511	4.20593	7.16216	2.68713	2.33121	2.4985	12	1.31507	1.80068	1.92694	1.96712	2.11644	2.43562	DD
53	UT145	202897220161_R02C02	H1413	FAC1194	BXD65b	CD	1.01093	370	2013-12-10	2014-04-11	2014-05-14	2014-12-15		F	122			21.5	30.3	8.8	33.33	11.9	2.7	1.34683	0.346084	1.24795	0.277694	1.37221	0.432626	1.21315	0.224149	0.848834	-0.127049	0.923493	0.0346742	2.65974	4.21899	7.17658	2.67381	2.42345	2.51633	16	1.46849	1.94178	2.06524	2.08082	2.16918	2.79452	DD
54	UT153	202897220161_R03C02	H1227	FAC1069	B6D2F1	CD	1.74863	640	2013-03-15	2013-08-09	2013-10-02	2014-12-15		F	147			33.5	36.5	3	45.94	5.6	0.3	2.50157	0.819851	1.95687	0.410649	2.01103	0.449429	2.05621	0.44722	0.913681	-0.788533	1.6768	0.155898	2.77465	4.34717	7.30669	2.83475	2.75166	2.64298	7	2.31781	2.34521	2.5225	2.41096	2.71781	2.9589	Het
55	UT178	202897220161_R04C02	H2107	FAC1647	BXD65b	CD	2.04372	748	2014-10-09	2015-02-06	2015-03-11	2016-10-26		F	120			20.2	21.4	1.2	17.62			2.101	0.146897	1.89288	0.116275	2.19976	0.38935	2.04879	0.191805	2.06308	0.07033	1.7938	0.0200734	2.64927	4.20834	7.16615	2.7569	2.46575	2.48074	16	1.46849	1.94178	2.06524	2.08082	2.16918	2.79452	DD
56	UT188	202897220161_R05C02	H1793	FAC1429	BXD65b	CD	1.43989	527	2014-07-07	2014-08-19	2014-09-08	2015-12-16		F	43			14.7	18.5	3.8	30.76			1.78459	0.387873	1.60326	0.298091	1.65135	0.350079	1.6196	0.270089	1.89399	0.495759	1.59672	0.340355	2.65722	4.21608	7.1738	2.6969	2.44561	2.50616	16	1.46849	1.94178	2.06524	2.08082	2.16918	2.79452	DD
57	UT190	202897220161_R06C02	H1794	FAC1430	BXD65b	CD	1.43989	527	2014-07-07	2014-08-19	2014-09-08	2015-12-16		F	43			16.3	20	3.7	42.63			1.86221	0.465493	1.66262	0.357449	1.78905	0.487773	1.66868	0.319171	1.85634	0.45811	1.58682	0.330456	2.64847	4.20852	7.16507	2.70517	2.46031	2.49228	16	1.46849	1.94178	2.06524	2.08082	2.16918	2.79452	DD
58	UT195	202897220041_R01C01	H1239	FAC1081	BXD48a	HFD	1.63115	597	2013-03-26	2013-08-09	2013-10-02	2014-11-13	2013-08-08	F	136	135	1	31.1	40.7	9.6	53.08	7.4	1.7	1.92219	0.348923	1.49216	0.037667	1.37177	-0.0907711	1.39433	-0.115916	0.72594	-0.860599	1.64229	0.22206	2.7503	4.32414	7.28461	2.86	2.64197	2.5977	16	1.16164	1.48767	1.75068	1.81781	1.97123	2.19178	BB
59	UT201	202897220041_R02C01	H1188	FAC1030	BXD48a	CD	1.65027	604	2013-03-19	2013-08-09	2013-10-02	2014-11-13		F	143			26.7	28.4	1.7	23.87	5.2	1.7	1.67783	0.0869155	1.29913	-0.17029	1.02522	-0.453448	1.38026	-0.146064	1.10048	-0.50489	0.99535	-0.44127	2.65553	4.21558	7.17315	2.73545	2.42371	2.49619	17	1.18904	1.63425	1.85189	1.88767	2.06986	2.4137	BB
60	UT204	202897220041_R03C01	H1410	FAC1191	BXD65b	CD	0.825137	302	2014-01-15	2014-04-11	2014-05-14	2014-11-13		F	86			21.3	25	3.7	24.01	15.4	2.2	1.0589	0.229664	0.935221	0.11002	0.917268	0.134339	0.864087	0.0312331	0.774256	-0.0186994	0.755336	0.0257071	2.65137	4.20719	7.16312	2.67012	2.38907	2.51198	16	1.46849	1.94178	2.06524	2.08082	2.16918	2.79452	DD
61	UT207	202897220041_R04C01	H1483	FAC1264	BXD40	CD	0.775956	284	2014-02-02	2014-04-11	2014-05-13	2014-11-13		F	68			17.5	20.4	2.9	21.12	9.3	2	0.659445	-0.124397	0.706532	-0.0802718	0.736086	-0.00537492	0.852614	0.0610934	0.504289	-0.240244	0.739196	0.0517062	2.6609	4.21916	7.17479	2.69422	2.38845	2.51584	14	0.731507	1.25616	1.76751	1.8411	2.26575	2.6	BB
62	UT214	202897220041_R05C01	H2578	FAC2141	BXD9	CD	0.669399	245	2016-02-24	2016-05-12	2016-06-29	2016-10-26		F	78			26.2	26.9	0.7	37.01			0.660632	-0.024848	0.698492	-0.00511718	0.638662	-0.0129526	0.88567	0.183703	0.585457	-0.054162	0.499874	-0.0963161	2.65178	4.21337	7.1726	2.66056	2.39207	2.50487	21	0.923288	1.18082	1.39035	1.26575	1.56986	2.61918	DD
63	UT219	202897220041_R06C01	H1913	FAC1467	BXD48	CD	1.4153	518	2014-07-15	2014-10-22	2014-11-10	2015-12-15		F	99			25	24.3	-0.7	28.88			1.37547	0.00145308	0.998797	-0.287172	0.844529	-0.436012	1.18824	-0.140603	1.28649	-0.0875338	0.78878	-0.446512	2.64245	4.20485	7.16369	2.69676	2.41779	2.49217	10	1.4137	1.75137	1.96603	1.95479	2.15959	2.59726	BB
64	UT223	202897220041_R01C02	H2577	FAC2140	BXD9	CD	0.669399	245	2016-02-24	2016-05-12	2016-06-29	2016-10-26		F	78			24.6	25.2	0.6	33.54			0.738737	0.0532574	0.697479	-0.00613052	0.573148	-0.0784668	0.840211	0.138244	0.609517	-0.0301014	0.443324	-0.152866	2.65342	4.21308	7.17018	2.66293	2.38353	2.50941	21	0.923288	1.18082	1.39035	1.26575	1.56986	2.61918	DD
65	UT226	202897220041_R02C02	H1506	FAC1290	BXD73	HFD	1.89617	694	2014-01-21	2014-04-11	2014-05-13	2015-12-16	2014-04-11	F	80	80	0	16.3	21.1	4.8	25.44			1.90258	0.0846678	1.48998	-0.171432	1.55842	-0.127587	1.41514	-0.317849	1.95506	0.107583	1.3935	-0.253813	2.67961	4.24298	7.20166	2.78134	2.44639	2.51063	12	1.31507	1.80068	1.92694	1.96712	2.11644	2.43562	DD
66	UT227	202897220041_R03C02	H1714	FAC1402	BXD65b	CD	0.47541	174	2014-05-03	2014-07-25	2014-09-08	2014-10-24		F	83			20.5	23	2.5	24.14	16.6	3.9	0.603713	0.0973037	0.590375	0.0382221	0.520932	0.032884	0.521691	-0.0172416	0.445293	-0.00332796	0.440332	0.0103557	2.64076	4.19785	7.15664	2.6536	2.35873	2.49805	16	1.46849	1.94178	2.06524	2.08082	2.16918	2.79452	DD
67	UT230	202897220041_R04C02	H1906	FAC1536	BXD73	CD	1.47268	539	2014-06-25	2014-10-22	2014-11-10	2015-12-16		F	119			19	20.6	1.6	20.47			1.38599	-0.04099	1.19673	-0.134036	1.113	-0.215923	1.17811	-0.198957	1.23384	-0.19667	0.826574	-0.45788	2.64818	4.20703	7.16193	2.74919	2.42014	2.47697	10	1.51507	1.61507	1.96986	1.93288	2.30068	2.38356	DD
68	UT235	202897220041_R05C02	H1784	FAC1735	BXD65	HFD	1.47814	541	2014-06-23	2014-08-13	2014-09-08	2015-12-16	2014-08-13	F	51	51	0	17.3	27	9.7	62.99			1.89129	0.459264	1.63236	0.297328	1.66775	0.334221	1.62954	0.247881	1.82298	0.387085	1.67918	0.390044	2.65383	4.21452	7.17033	2.76724	2.47721	2.48341	16	1.03836	1.23904	1.52397	1.58904	1.73356	2.01644	DD
69	UT237	202897220041_R06C02	H2089	FAC1629	BXD73b	CD	2.03005	743	2014-10-14	2015-02-06	2015-03-11	2016-10-26		F	115			16.3	16.6	0.3	16.48			1.38144	-0.560053	1.49457	-0.27137	1.28602	-0.512864	1.30636	-0.539147	1.68614	-0.293152	1.25609	-0.505934	2.6294	4.19639	7.15527	2.67662	2.39817	2.48087	16	1.79726	2.00137	2.2536	2.24658	2.54384	2.88493	DD
70	UT241	202894750030_R01C01	H2288	FAC1847	B6D2F1	HFD	1.49454	547	2015-04-28	2015-08-05	2015-10-06	2016-10-26	2015-08-05	F	99	99	0	23.5	43.4	19.9	72.2			1.60891	0.161748	1.42678	0.0789494	1.30559	-0.0417627	1.43268	0.037242	1.6695	0.217463	1.44219	0.139006	2.67861	4.24191	7.20068	2.72761	2.48232	2.52346	<5							Het
71	UT245	202894750030_R02C01	H1907	FAC1537	BXD73	CD	1.47268	539	2014-06-25	2014-10-22	2014-11-10	2015-12-16		F	119			19.9	20.6	0.7	21.26			1.22766	-0.199325	1.13675	-0.194021	1.00086	-0.328062	1.01671	-0.360354	1.09979	-0.33072	0.804772	-0.479681	2.65742	4.21717	7.17297	2.74493	2.41592	2.48713	10	1.51507	1.61507	1.96986	1.93288	2.30068	2.38356	DD
72	UT259	202894750030_R04C01	H0459	FAC423	BXD65	HFD	0.628415	230	2011-09-23	2011-12-14	2012-03-26	2012-05-10	2012-02-13	F	82	143	-61	22.9	34	11.1	42.96	9.5	2.7	0.8617	0.214051	0.78664	0.115029	0.693347	0.0762893	0.711755	0.0442325	0.694471	0.0952034	0.6037	0.0426257	2.64853	4.20713	7.16217	2.66877	2.39586	2.50145	16	1.03836	1.23904	1.52397	1.58904	1.73356	2.01644	DD
73	UT261	202894750030_R05C01	H0070	FAC059	BXD48a	CD	1.14481	419	2011-03-17	2011-10-26	2012-03-26	2012-05-09		F	223			24.4	25.3	0.9	23.71	6.5	1.5	1.03884	-0.0854928	0.833891	-0.240894	0.747639	-0.304829	0.959205	-0.142311	0.708642	-0.399056	0.703074	-0.300455	2.63638	4.19347	7.15047	2.73157	2.40896	2.47632	17	1.18904	1.63425	1.85189	1.88767	2.06986	2.4137	BB
74	UT268	202894750030_R06C01	H1452	FAC1233	BXD48a	HFD	1.19126	436	2014-02-17	2014-04-11	2014-05-14	2015-04-29	2014-04-11	F	53	53	0	18.8	24.7	5.9	46.92	9	2.3	1.29865	0.131447	1.07054	-0.0405057	0.925835	-0.165797	0.940086	-0.200466	0.878965	-0.274466	0.79805	-0.245277	2.63841	4.20273	7.16002	2.69317	2.43491	2.48738	16	1.16164	1.48767	1.75068	1.81781	1.97123	2.19178	BB
75	UT270	202894750030_R01C02	H1369	FAC1184	BXD102	CD	1.41257	517	2013-11-28	2014-01-13	2014-03-11	2015-04-29		M	46			16.3	24.7	8.4	26.76	4.7	3	1.38576	0.0142649	1.38181	0.0979759	1.29559	0.0173508	1.61891	0.292359	1.60309	0.231755	1.32148	0.0885258	2.64959	4.20693	7.16387	2.62019	2.46167	2.5039	<5							BB
76	UT272	202894750030_R02C02	H1482	FAC1263	BXD40	CD	1.23224	451	2014-02-02	2014-04-11	2014-05-13	2015-04-29		F	68			18	22.8	4.8	25.95	8.6	2.1	1.14868	-0.0563604	1.17832	0.0352699	1.04664	-0.079551	1.28476	0.109766	1.15715	-0.0366368	1.15222	0.0737724	2.66433	4.22632	7.18294	2.70659	2.43491	2.51172	14	0.731507	1.25616	1.76751	1.8411	2.26575	2.6	BB
77	UT273	202894750030_R03C02	H1453	FAC1234	BXD48a	HFD	1.19126	436	2014-02-17	2014-04-11	2014-05-14	2015-04-29	2014-04-11	F	53	53	0	21.4	28.6	7.2	55.48	10.3	2.6	1.34498	0.17778	1.09737	-0.0136749	0.834181	-0.257451	0.94379	-0.196762	1.01875	-0.134678	0.855158	-0.188169	2.6778	4.24252	7.2017	2.74339	2.44637	2.52053	16	1.16164	1.48767	1.75068	1.81781	1.97123	2.19178	BB
78	UT274	202894750030_R04C02	H1377	FAC1145	BXD48	HFD	1.62568	595	2013-09-11	2013-11-15	2014-01-16	2015-04-29	2013-11-15	F	65	65	0	20.4	25.2	4.8	45.93	10.6	1.7	1.52622	-0.0420046	1.36644	-0.0837871	1.31426	-0.143671	1.32099	-0.184666	1.58204	0.000884806	1.20455	-0.210998	2.67213	4.23543	7.19194	2.77003	2.48968	2.50716	16	1.1863	1.28356	1.52551	1.45616	1.72534	2.24932	BB
79	UT275	202894750030_R05C02	H0210	FAC192	BXD48a	HFD	0.636612	233	2011-09-21	2011-11-15	2012-03-26	2012-05-11	2012-02-13	F	55	145	-90	27.6	37.4	9.8	41.76	13.4	3	0.637228	-0.0179866	0.561121	-0.11689	0.569187	-0.0547821	0.547182	-0.12723	0.552233	-0.0551047	0.37776	-0.190337	2.64906	4.20991	7.16681	2.67032	2.40611	2.50317	16	1.16164	1.48767	1.75068	1.81781	1.97123	2.19178	BB
80	UT277	202894750030_R06C02	H1455	FAC1236	BXD48a	CD	1.19126	436	2014-02-17	2014-04-11	2014-05-14	2015-04-29		F	53			21.4	25.4	4	27.34	11.4	1.9	1.21225	0.0450477	1.00214	-0.108906	1.11663	0.0249942	0.966839	-0.173713	1.13779	-0.0156432	0.782675	-0.260652	2.64204	4.20439	7.16269	2.65505	2.44703	2.49663	17	1.18904	1.63425	1.85189	1.88767	2.06986	2.4137	BB
81	UT278	202897220043_R01C01	H1454	FAC1235	BXD48a	CD	1.19126	436	2014-02-17	2014-04-11	2014-05-14	2015-04-29		F	53			18.7	22.9	4.2	25.83	10.5	1.8	1.19426	0.0270521	0.941472	-0.169576	0.903399	-0.188233	0.972315	-0.168237	0.764898	-0.388533	0.722247	-0.32108	2.64371	4.19799	7.15457	2.70083	2.37944	2.49854	17	1.18904	1.63425	1.85189	1.88767	2.06986	2.4137	BB
82	UT280	202897220043_R02C01	H1378	FAC1146	BXD48	HFD	1.62568	595	2013-09-11	2013-11-15	2014-01-16	2015-04-29	2013-11-15	F	65	65	0	17.2	21.5	4.3	25.76	9.5	2.1	1.73144	0.163217	1.2017	-0.248528	1.12052	-0.337412	1.15669	-0.348964	1.3588	-0.222361	1.09266	-0.322894	2.67846	4.23713	7.19367	2.78033	2.49011	2.52415	16	1.1863	1.28356	1.52551	1.45616	1.72534	2.24932	BB
83	UT282	202897220043_R03C01	H1444	FAC1225	B6D2F1	HFD	1.71038	626	2013-08-09	2014-04-11	2014-05-14	2015-04-27	2014-04-11	F	245	245	0	31.7	41.6	9.9	63.23	8.8	2.9	1.67328	0.0268778	1.67147	0.155113	1.71917	0.189826	1.7042	0.127358	1.97586	0.311308	1.61605	0.127927	2.65025	4.20867	7.16576	2.70023	2.42207	2.49575	<5							Het
84	UT285	202897220043_R04C01	H1823	FAC1454	BXD44	CD	0.655738	240	2014-08-23	2014-10-22	2014-11-10	2015-04-20		F	60			15.7	17.8	2.1	21	11.8	1.8	0.583143	-0.0897264	0.580922	-0.112021	0.525968	-0.114128	0.545713	-0.144772	0.409621	-0.216547	0.579819	-0.00466551	2.6448	4.20358	7.16192	2.6745	2.3618	2.49189	<5							BB
85	UT286	202897220043_R05C01	H1441	FAC1222	D2B6F1	CD	1.2623	462	2014-01-20	2014-04-11	2014-05-14	2015-04-27		M	81			35.9	40.7	4.8	52.01	11	4.2	1.36985	0.137066	1.27442	0.107905	1.29152	0.13999	1.34664	0.146388	1.73214	0.508764	1.14504	0.0408496	2.65406	4.21264	7.16906	2.63433	2.4842	2.50456	<5							Het
86	UT287	202897220043_R06C01	H1440	FAC1221	D2B6F1	CD	1.2623	462	2014-01-20	2014-04-11	2014-05-14	2015-04-27		M	81			33.8	39.2	5.4	45.88	9.4	2.7	1.45146	0.218685	1.35912	0.192611	1.44185	0.290319	1.50471	0.304454	1.62778	0.404408	1.24891	0.144717	2.62024	4.18197	7.13964	2.58276	2.48655	2.47769	<5							Het
87	UT289	202897220043_R01C02	H1445	FAC1226	B6D2F1	HFD	1.69126	619	2013-08-09	2014-04-11	2014-05-14	2015-04-20	2014-04-11	F	245	245	0	35.5	45.2	9.7	73.7	12.6	4	1.74151	0.112755	1.51362	0.0121983	1.56016	0.0469429	1.5615	0.000737837	1.75605	0.110332	1.51865	0.046917	2.65629	4.21238	7.16969	2.71713	2.43882	2.5057	<5							Het
88	UT291	202897220043_R02C02	H1743	FAC1185	BXD102	CD	1.41257	517	2013-11-28	2014-01-13	2014-03-11	2015-04-29		M	46			15.4	24.9	9.5	29.25	9.3	2.5	1.34229	-0.0292002	1.27809	-0.00574627	1.20688	-0.0713593	1.53943	0.212884	1.52731	0.155976	1.33906	0.106107	2.62691	4.17972	7.13683	2.6299	2.42055	2.47984	<5							BB
89	UT302	202897220043_R03C02	H1352	FAC1061	B6D2F1	CD	0.994536	364	2013-04-24	2013-08-09	2013-10-02	2014-04-23		M	107			37.8	42.4	4.6	51.82	9.8	2.5	1.08798	0.102369	1.06741	0.109948	1.00999	0.0842276	1.20402	0.228797	1.03272	0.0729773	0.892497	0.0177245	2.65478	4.21271	7.16848	2.62662	2.46363	2.51002	<5							Het
90	UT306	202897220043_R04C02	H1170	FAC1012	D2B6F1	CD	1.01093	370	2013-04-17	2013-08-09	2013-10-02	2014-04-22		F	114			30.8	31.9	1.1	41.62	12.5	2.1	0.979818	-0.0209262	1.00767	0.0374127	0.952831	0.0132465	1.13012	0.141118	0.79694	-0.178943	0.752901	-0.135918	2.65531	4.21566	7.17346	2.66532	2.42002	2.50782	9	1.60274	1.82329	2.16925	2.23562	2.38767	2.72877	Het
91	UT307	202897220043_R05C02	H0328	FAC306	BXD77	HFD	1.97541	723	2011-10-24	2011-12-13	2012-03-26	2013-10-16	2012-02-13	F	50	112	-62	24.2	28.5	4.3	63.35	9.2	1.8	2.26289	0.371839	1.91804	0.194762	2.05527	0.302463	2.08085	0.281277	2.45507	0.529576	2.13794	0.422733	2.67783	4.24162	7.19984	2.7825	2.52514	2.51081	11	1.20822	1.6137	1.93524	1.86575	2.30959	2.52877	DD
92	UT308	202897220043_R06C02	H1160	FAC1002	D2B6F1	CD	1.0847	397	2013-03-21	2013-08-09	2013-10-02	2014-04-22		M	141			38.2	42.1	3.9	39.53	15.3	4.8	1.19623	0.127387	1.20814	0.180283	1.21458	0.21279	1.30115	0.250153	1.09832	0.0498008	1.05002	0.0979906	2.6299	4.19165	7.14725	2.58967	2.49601	2.49116	<5							Het
93	UT310	202897220034_R02C01	H1057	FAC899	BXD40	CD	0.989071	362	2013-04-25	2013-08-09	2013-10-02	2014-04-22		F	106			23.4	23.4	0	22.59	8.1	1.8	0.899929	-0.0806387	1.09246	0.139268	1.03793	0.116772	1.20835	0.237721	0.662445	-0.291917	1.10136	0.231267	2.66824	4.22904	7.18545	2.72764	2.41418	2.51304	14	0.731507	1.25616	1.76751	1.8411	2.26575	2.6	BB
94	UT316	202897220034_R03C01	H2053	FAC1593	BXD48	HFD	0.513661	188	2014-10-14	2015-02-06	2015-03-11	2015-04-20	2015-02-06	F	115	115	0	21.9	23.8	1.9	25.7	12.8	3.2	0.430919	-0.1108	0.43542	-0.146598	0.419707	-0.100593	0.352141	-0.21894	0.393593	-0.0926892	0.281777	-0.180974	2.64343	4.2012	7.15798	2.64089	2.35744	2.50496	16	1.1863	1.28356	1.52551	1.45616	1.72534	2.24932	BB
95	UT317	202897220034_R04C01	H2054	FAC1594	BXD48	CD	0.513661	188	2014-10-14	2015-02-06	2015-03-11	2015-04-20		F	115			23.4	25.3	1.9	25.9	18.4	2.2	0.443781	-0.0979385	0.509006	-0.0730113	0.408146	-0.112154	0.357077	-0.214003	0.365961	-0.120321	0.257437	-0.205315	2.63886	4.19784	7.15437	2.64951	2.35775	2.49651	10	1.4137	1.75137	1.96603	1.95479	2.15959	2.59726	BB
96	UT318	202897220034_R05C01	H1822	FAC1453	BXD44	CD	0.655738	240	2014-08-23	2014-10-22	2014-11-10	2015-04-20		F	60			16.3	17.1	0.8	20.6	8.8	2.2	0.521346	-0.151524	0.526406	-0.166537	0.535941	-0.104155	0.372403	-0.318082	0.552511	-0.073657	0.625249	0.0407642	2.68584	4.25645	7.21556	2.65518	2.37856	2.56616	<5							BB
97	UT319	202897220034_R06C01	H2072	FAC1612	BXD73	CD	0.562842	206	2014-09-26	2015-02-06	2015-03-11	2015-04-20		F	133			18.9	19.9	1	19.9	9.4	0.6	0.500134	-0.0869832	0.463305	-0.157109	0.4249	-0.136867	0.381963	-0.23045	0.365405	-0.1693	0.252475	-0.252414	2.64295	4.202	7.15936	2.64181	2.32003	2.5023	10	1.51507	1.61507	1.96986	1.93288	2.30068	2.38356	DD
98	UT320	202897220034_R01C02	H2046	FAC1588	BXD48	HFD	0.516393	189	2014-10-13	2015-02-06	2015-03-11	2015-04-20	2015-02-06	F	116	116	0	26.4	33.9	7.5	41.8	12.2	3	0.548598	0.00435693	0.531477	-0.0526736	0.540657	0.0180533	0.500709	-0.0726674	0.402831	-0.0861415	0.346131	-0.118962	2.6396	4.19748	7.15373	2.65875	2.3816	2.49432	16	1.1863	1.28356	1.52551	1.45616	1.72534	2.24932	BB
99	UT324	202897220034_R02C02	H1327	FAC1131	BXD40	CD	1.84426	675	2013-06-18	2013-11-15	2014-01-16	2015-04-24		F	150			28.8	27.6	-1.2	30.97	8.8	1.8	1.57461	-0.19538	1.45648	-0.1644	1.37998	-0.262247	1.70797	0.01861	1.20042	-0.595949	1.61123	0.00839312	2.71761	4.28551	7.24441	2.76528	2.56238	2.5698	14	0.731507	1.25616	1.76751	1.8411	2.26575	2.6	BB
100	UT345	202897220034_R04C02	H1859	FAC1490	BXD73	CD	0.70765	259	2014-08-04	2014-10-22	2014-11-10	2015-04-20		F	79			16.5	17.7	1.2	21.9	7.3	1	0.70459	-0.0162	0.657992	-0.0754816	0.627043	-0.0568235	0.513801	-0.220313	0.594243	-0.0830377	0.375086	-0.253878	2.65305	4.21407	7.17073	2.69917	2.33252	2.49805	10	1.51507	1.61507	1.96986	1.93288	2.30068	2.38356	DD
101	UT347	202897220034_R05C02	H2071	FAC1611	BXD73	HFD	0.562842	206	2014-09-26	2015-02-06	2015-03-11	2015-04-20	2015-02-06	F	133	133	0	20	23.1	3.1	24.28	13.2	0.7	0.507208	-0.0799092	0.475065	-0.145349	0.463654	-0.0981142	0.380129	-0.232284	0.505278	-0.0294269	0.309607	-0.195282	2.6373	4.1973	7.15396	2.65824	2.31888	2.49087	12	1.31507	1.80068	1.92694	1.96712	2.11644	2.43562	DD
102	UT373	202897220033_R03C01	H1398	FAC1164	BXD77	CD	1.25683	460	2014-01-26	2014-02-28	2014-03-11	2015-05-01		F	33			11.3	14.8	3.5	26.44	9.4	1.9	1.21852	-0.00921071	1.48388	0.321639	1.2486	0.101682	1.52771	0.332044	1.31457	0.096581	1.22779	0.128283	2.6765	4.23597	7.19481	2.7127	2.49485	2.52311	13	1.31507	1.72329	2.22845	2.40274	2.66712	2.78904	DD
103	UT376	202897220033_R04C01	H1554	FAC1336	BXD79	CD	1.27869	468	2014-01-18	2014-04-11	2014-05-14	2015-05-01		F	83			19.7	22.3	2.6	27.83	11.6	1.8	1.43972	0.191808	1.41038	0.231066	1.27316	0.107812	1.3148	0.100771	1.51152	0.272003	1.40122	0.282977	2.66562	4.22574	7.18166	2.70186	2.40607	2.50735	8	1.23014	1.43082	1.55103	1.55479	1.63767	1.92603	DD
104	UT380	202897220033_R05C01	H1180	FAC1022	BXD73b	HFD	1.9918	729	2012-09-20	2013-08-09	2013-10-02	2014-09-19	2013-08-08	F	323	322	1	25.2	30.1	4.9	37.79	14	1.7	2.31158	0.405396	1.78057	0.0444978	1.58392	-0.182715	1.55685	-0.256508	1.37744	-0.564198	1.8201	0.0908536	2.72031	4.2913	7.25048	2.81364	2.51502	2.55338	21	1.3589	1.73425	2.1028	2.19726	2.43836	2.60548	DD
105	UT386	202897220033_R02C02	H0825	FAC762	BXD79	CD	0.592896	217	2012-01-31	2012-07-20	2012-08-15	2012-09-04		F	171			23.9	25.5	1.6	25.5	16.8	1.8	0.552613	-0.0622473	0.557573	-0.0863064	0.492303	-0.094806	0.569358	-0.0683135	0.445684	-0.118612	0.566733	0.0360918	2.64886	4.20674	7.16623	2.65568	2.34708	2.50426	8	1.23014	1.43082	1.55103	1.55479	1.63767	1.92603	DD
106	UT404	202897220033_R03C02	H1223	FAC1065	B6D2F1	CD	0.590164	216	2013-03-15	2013-08-09	2013-10-02	2013-10-17		F	147			25.6	30.1	4.5	31.39	12.3	1.8	0.502295	-0.110044	0.565438	-0.076308	0.45713	-0.127676	0.582007	-0.053368	0.513402	-0.0482035	0.477841	-0.0504592	2.66288	4.22649	7.18289	2.65764	2.39623	2.52311	7	2.31781	2.34521	2.5225	2.41096	2.71781	2.9589	Het
107	UT409	202897220033_R04C02	H0214	FAC196	BXD48a	HFD	0.969945	355	2011-09-17	2011-11-15	2012-03-26	2012-09-06	2012-02-13	F	59	149	-90	47	34.6	-12.4	32.4	14.8	2.4	1.13191	0.169002	0.74981	-0.18845	0.619859	-0.285168	0.728837	-0.225718	0.590635	-0.344897	0.561005	-0.292699	2.66227	4.22115	7.17659	2.72644	2.41869	2.50755	16	1.16164	1.48767	1.75068	1.81781	1.97123	2.19178	BB
108	UT412	202897220033_R05C02	H1295	FAC1068	B6D2F1	HFD	0.590164	216	2013-03-15	2013-08-09	2013-10-02	2013-10-17	2013-08-08	F	147	146	1	25.2	34	8.8	34.72	14.1	2.7	0.511801	-0.100538	0.561941	-0.0798053	0.532503	-0.0523028	0.476536	-0.15884	0.405454	-0.156151	0.419085	-0.109215	2.66281	4.22475	7.18267	2.65434	2.37355	2.52477	<5							Het
109	UT414	202897220033_R06C02	H0216	FAC198	BXD48a	HFD	0.959016	351	2011-09-21	2011-11-15	2012-03-26	2012-09-06	2012-02-13	F	55	145	-90	27.2	34.3	7.1	45.3	16.3	3.1	0.95042	-0.00240374	0.744206	-0.185521	0.731667	-0.164146	0.823228	-0.122142	0.676939	-0.247832	0.552665	-0.291674	2.65991	4.22167	7.1791	2.69953	2.42736	2.5106	16	1.16164	1.48767	1.75068	1.81781	1.97123	2.19178	BB
110	UT420	202794570018_R01C01	H1302	FAC1067	B6D2F1	HFD	0.590164	216	2013-03-15	2013-08-09	2013-10-02	2013-10-17	2013-08-08	F	147	146	1	26.1	42.9	16.8	43.59	11.1	1.8	0.468793	-0.143546	0.478873	-0.162874	0.539574	-0.0452318	0.528321	-0.107055	0.434973	-0.126632	0.352069	-0.176231	2.66406	4.22498	7.18256	2.64413	2.38788	2.53005	<5							Het
111	UT424	202794570018_R02C01	H1298	FAC1120	BXD65	HFD	1.00273	367	2013-01-04	2013-08-09	2013-10-02	2014-01-06	2013-08-08	F	217	216	1	31.3	46.6	15.3	55.23	11.5	2.8	1.2922	0.299022	1.16274	0.198877	1.26991	0.337236	0.978185	-0.0039254	1.17957	0.21176	0.979026	0.0972296	2.64627	4.20541	7.16372	2.67455	2.42071	2.49891	16	1.03836	1.23904	1.52397	1.58904	1.73356	2.01644	DD
112	UT427	202794570018_R03C01	H1766	FAC1397	BXD65b	CD	0.510929	187	2014-05-11	2014-07-25	2014-09-08	2014-11-14		F	75			21.1	23.4	2.3	26.09	15.1	2.3	0.765203	0.226006	0.637675	0.0577911	0.590303	0.0723069	0.532273	-0.0365108	0.428531	-0.0550615	0.455259	-0.0051509	2.64326	4.20035	7.15699	2.64198	2.35156	2.50259	16	1.46849	1.94178	2.06524	2.08082	2.16918	2.79452	DD
113	UT434	202794570018_R04C01	H2287	FAC1846	B6D2F1	HFD	1.49454	547	2015-04-28	2015-08-05	2015-10-06	2016-10-26	2015-08-05	F	99	99	0	26.1	43.1	17	91.06			1.59024	0.143084	1.43071	0.08288	1.72476	0.377406	1.65636	0.260921	2.18649	0.734461	2.22301	0.919832	2.70336	4.26822	7.22604	2.73554	2.52082	2.56505	<5							Het
114	UT437	202794570018_R05C01	H1866	FAC1497	BXD77	HFD	1.39617	511	2014-07-23	2014-10-22	2014-11-10	2015-12-16	2014-10-22	F	91	91	0	22.1	23.5	1.4	55.8			1.42215	0.0657916	1.55381	0.282769	1.46362	0.19921	1.54517	0.232395	1.78295	0.427762	1.62962	0.410714	2.68145	4.24635	7.20475	2.74029	2.49586	2.52953	11	1.20822	1.6137	1.93524	1.86575	2.30959	2.52877	DD
115	UT443	202794570018_R06C01	H1165	FAC1007	D2B6F1	CD	2.03279	744	2012-04-08	2013-08-09	2013-10-02	2014-04-22		F	488			33.4	35.4	2	43.9	13.7	2.6	1.60248	-0.341535	1.06547	-0.702603	1.29545	-0.505736	1.20015	-0.647647	1.24588	-0.736106	0.885546	-0.878819	2.68933	4.25885	7.21667	2.67975	2.44098	2.56196	9	1.60274	1.82329	2.16925	2.23562	2.38767	2.72877	Het
116	UT450	202794570018_R01C02	H0145	FAC130	BXD77	HFD	0.964481	353	2011-09-18	2011-11-14	2012-03-26	2012-09-05	2012-02-13	F	57	148	-91	26.8	30.6	3.8	33.9	13.2	3.7	1.03597	0.0781	1.24525	0.311255	0.895631	-0.00478942	1.17994	0.229973	0.966604	0.036453	0.98807	0.139049	2.67628	4.23955	7.19724	2.68839	2.47728	2.5317	11	1.20822	1.6137	1.93524	1.86575	2.30959	2.52877	DD
117	UT451	202794570018_R02C02	H2290	FAC1849	B6D2F1	HFD	1.49454	547	2015-04-28	2015-08-05	2015-10-06	2016-10-26	2015-08-05	F	99	99	0	24	42.6	18.6	91.3			1.80806	0.3609	1.41167	0.0638371	1.54087	0.193522	1.57175	0.176312	1.81659	0.364554	1.73244	0.429257	2.66497	4.22721	7.18314	2.70491	2.45519	2.51324	<5							Het
118	UT464	202794570018_R03C02	H1159	FAC1001	D2B6F1	CD	1.0847	397	2013-03-21	2013-08-09	2013-10-02	2014-04-22		M	141			41.3	44.8	3.5	46.88	14	3.2	1.28179	0.212944	1.06285	0.0349944	1.37755	0.375767	1.23507	0.184069	1.37207	0.323555	1.04308	0.0910524	2.67115	4.23323	7.19098	2.62142	2.51183	2.53143	<5							Het
119	UT466	202794570018_R04C02	H0031	FAC027	BXD77	CD	2.06831	757	2011-01-17	2011-10-25	2012-03-26	2013-02-12		F	281			21.8	21.1	-0.7	16.06	7.6	1.5	1.39342	-0.583378	1.67557	-0.120236	1.49026	-0.340876	1.72623	-0.151424	1.82825	-0.18871	1.1752	-0.6196	2.65101	4.21096	7.16869	2.76376	2.43488	2.48984	13	1.31507	1.72329	2.22845	2.40274	2.66712	2.78904	DD
120	UT467	202794570018_R05C02	H0136	FAC121	BXD48	CD	2.02186	740	2011-10-06	2011-11-14	2012-03-26	2013-10-15		F	39			22	25	3	26.27	9.8	1.5	1.71678	-0.217143	1.49916	-0.260375	1.10831	-0.683666	1.50211	-0.336501	1.76157	-0.209655	1.24118	-0.513818	2.655	4.21601	7.1729	2.72708	2.43713	2.49858	10	1.4137	1.75137	1.96603	1.95479	2.15959	2.59726	BB
121	UT474	202794570018_R06C02	H1153	FAC995	D2B6F1	CD	0.57377	210	2013-03-21	2013-08-09	2013-10-02	2013-10-17		F	141			30.3	34	3.7	37.96	9	0.9	0.542512	-0.0546937	0.582345	-0.0466023	0.54417	-0.0268125	0.59842	-0.0231775	0.391461	-0.154004	0.484462	-0.0297919	2.6623	4.22511	7.18382	2.64228	2.40003	2.52625	9	1.60274	1.82329	2.16925	2.23562	2.38767	2.72877	Het
122	UT477	202794570021_R01C01	H1236	FAC1078	B6D2F1	HFD	1.47541	540	2013-02-28	2013-08-09	2013-10-02	2014-08-22	2013-08-08	M	162	161	1	45.6	50.8	5.2	65.27	9.5	5.3	1.87582	0.446313	1.32931	-0.00359365	1.70092	0.369695	1.66601	0.286643	2.35768	0.92448	1.98794	0.701141	2.69014	4.2564	7.21411	2.72086	2.5371	2.5438	<5							Het
123	UT480	202794570021_R02C01	H0132	FAC117	BXD48	CD	1.99727	731	2011-10-15	2011-11-14	2012-03-26	2013-10-15		F	30			25.4	25.5	0.1	29.72	8.2	0.5	1.81227	-0.098955	1.46136	-0.278982	1.28201	-0.489228	1.65733	-0.160615	1.79227	-0.154748	1.20499	-0.528939	2.65761	4.22149	7.17947	2.74453	2.43652	2.49924	10	1.4137	1.75137	1.96603	1.95479	2.15959	2.59726	BB
124	UT488	202794570021_R03C01	H1303	FAC1076	B6D2F1	HFD	0.994536	364	2013-04-24	2013-08-09	2013-10-02	2014-04-23	2013-08-08	F	107	106	1	26	31.8	5.8	53.18	15.9	2.2	0.960869	-0.0247428	0.982281	0.0248222	1.02227	0.0965105	1.05458	0.0793589	1.12114	0.161396	0.904748	0.0299753	2.64906	4.20954	7.16872	2.67834	2.39608	2.50527	<5							Het
125	UT490	202794570021_R04C01	H1285	FAC1119	BXD65	HFD	1.00273	367	2013-01-04	2013-08-09	2013-10-02	2014-01-06	2013-08-08	F	217	216	1	33.1	52.5	19.4	66.61	11.2	3.4	1.35348	0.360303	1.17509	0.211233	1.3414	0.408725	1.16823	0.186116	1.65092	0.683108	1.15788	0.276081	2.65436	4.21481	7.17017	2.69706	2.44621	2.50717	16	1.03836	1.23904	1.52397	1.58904	1.73356	2.01644	DD
126	UT493	202794570021_R05C01	H1237	FAC1079	B6D2F1	HFD	1.47541	540	2013-02-28	2013-08-09	2013-10-02	2014-08-22	2013-08-08	M	162	161	1	41.6	49.9	8.3	61.95	11.3	7.7	1.69256	0.26306	1.37396	0.0410585	1.68126	0.350038	1.78767	0.408306	2.46869	1.03549	2.08885	0.802058	2.72162	4.2902	7.24795	2.73754	2.59987	2.58404	<5							Het
127	UT496	202794570021_R06C01	H0645	FAC595	D2B6F1	CD	1.48907	545	2011-12-23	2012-07-23	2012-08-15	2013-06-20		F	213			29	31.8	2.8	35.75	11.4	2.7	1.50331	0.0611987	1.42047	0.0769062	1.48963	0.146886	1.49597	0.105131	1.52792	0.0812683	1.2775	-0.0210038	2.61216	4.17955	7.13801	2.61807	2.39278	2.47813	9	1.60274	1.82329	2.16925	2.23562	2.38767	2.72877	Het
128	UT497	202794570021_R01C02	H1232	FAC1074	B6D2F1	CD	0.994536	364	2013-04-24	2013-08-09	2013-10-02	2014-04-23		F	107			24	30.8	6.8	46.4	9.8	2	0.90156	-0.0840515	0.938437	-0.0190212	0.892379	-0.0333828	0.915227	-0.0599946	0.918866	-0.0408761	0.772189	-0.102584	2.66236	4.22174	7.17991	2.65192	2.40714	2.52857	7	2.31781	2.34521	2.5225	2.41096	2.71781	2.9589	Het
129	UT502	202794570021_R02C02	H0646	FAC596	D2B6F1	CD	1.48907	545	2011-12-23	2012-07-23	2012-08-15	2013-06-20		F	213			43.7	41.7	-2	48.47	16.1	2.5	1.51166	0.0695474	1.36214	0.0185705	1.39905	0.0563099	1.60083	0.209982	1.67503	0.228379	1.35922	0.0607217	2.66733	4.22911	7.18709	2.68899	2.45356	2.51949	9	1.60274	1.82329	2.16925	2.23562	2.38767	2.72877	Het
130	UT505	202794570021_R03C02	H1154	FAC996	D2B6F1	CD	0.57377	210	2013-03-21	2013-08-09	2013-10-02	2013-10-17		F	141			39.2	40.2	1	41.77	14.7	1.6	0.461738	-0.135468	0.601953	-0.0269947	0.627757	0.0567744	0.663613	0.042015	0.599118	0.0536529	0.546256	0.032002	2.65156	4.21172	7.1712	2.64629	2.38728	2.51285	9	1.60274	1.82329	2.16925	2.23562	2.38767	2.72877	Het
131	UT509	202794570021_R04C02	H1222	FAC1064	B6D2F1	CD	0.994536	364	2013-04-24	2013-08-09	2013-10-02	2014-04-23		F	107			24.5	29.4	4.9	33.03	9.9	1.8	0.992653	0.00704124	1.09664	0.139183	0.878789	-0.0469722	1.05695	0.0817317	0.972136	0.0123936	0.977149	0.102376	2.66673	4.22662	7.18482	2.68209	2.4401	2.52231	7	2.31781	2.34521	2.5225	2.41096	2.71781	2.9589	Het
132	UT518	202794570021_R05C02	H1224	FAC1066	B6D2F1	CD	0.590164	216	2013-03-15	2013-08-09	2013-10-02	2013-10-17		F	147			29.2	30.8	1.6	32.5	12.5	1.2	0.62275	0.0104113	0.569676	-0.072071	0.572592	-0.0122132	0.550361	-0.085014	0.491272	-0.0703335	0.439368	-0.0889323	2.66066	4.22009	7.17676	2.64056	2.39542	2.52478	7	2.31781	2.34521	2.5225	2.41096	2.71781	2.9589	Het
133	UT529	202794570021_R06C02	H1221	FAC1063	B6D2F1	CD	0.994536	364	2013-04-24	2013-08-09	2013-10-02	2014-04-23		M	107			39.1	43.5	4.4	52.8	14.2	0.9	1.18906	0.203449	0.903435	-0.0540234	1.26847	0.342708	1.03075	0.0555329	1.07978	0.120041	0.860271	-0.014502	2.68424	4.25436	7.21078	2.60122	2.52431	2.55889	<5							Het
134	UT530	202794570013_R01C01	H0146	FAC131	BXD77	CD	0.964481	353	2011-09-18	2011-11-14	2012-03-26	2012-09-05		F	57			25.3	25.6	0.3	25	7.8	0.5	0.943585	-0.014283	1.11272	0.178727	0.896937	-0.00348332	1.21236	0.262397	0.882354	-0.0477972	0.839436	-0.0095853	2.68009	4.24133	7.19766	2.72153	2.46651	2.5343	13	1.31507	1.72329	2.22845	2.40274	2.66712	2.78904	DD
135	UT537	202794570013_R02C01	H0148	FAC133	BXD77	CD	0.961749	352	2011-09-19	2011-11-14	2012-03-26	2012-09-05		F	56			22.5	23.7	1.2	25	15.8	2.2	0.766907	-0.188439	0.989391	0.0575309	0.86025	-0.0378662	0.986493	0.0388264	0.819101	-0.10836	0.762107	-0.0845729	2.67102	4.23272	7.19097	2.67957	2.43621	2.5315	13	1.31507	1.72329	2.22845	2.40274	2.66712	2.78904	DD
136	UT541	202794570013_R03C01	H0299	FAC277	BXD83	CD	1.51093	553	2011-03-02	2011-12-13	2012-03-26	2012-09-05		F	286			23.5	22.8	-0.7	22.7	8.1	0.5	1.25281	-0.209486	1.58272	0.222089	1.45763	0.0964619	1.57858	0.169368	1.40285	-0.0653262	1.29583	-0.0214004	2.67327	4.23495	7.19403	2.72624	2.49448	2.52844	<5							DD
137	UT543	202794570013_R04C01	H1162	FAC1004	D2B6F1	CD	2.03279	744	2012-04-08	2013-08-09	2013-10-02	2014-04-22		F	488			32.5	36.7	4.2	42.05	12.7	2.6	0.845639	-1.09838	0.937589	-0.830482	1.02682	-0.774374	0.960047	-0.887752	0.885652	-1.09633	0.780147	-0.984219	2.65033	4.21046	7.16895	2.66535	2.41264	2.50456	9	1.60274	1.82329	2.16925	2.23562	2.38767	2.72877	Het
138	UT545	202794570013_R05C01	H0588	FAC538	BXD48	HFD	1.52186	557	2011-12-10	2012-07-23	2012-08-15	2013-06-19	2012-07-20	F	226	223	3	27.8	36.7	8.9	76.21	13.5	2.2	1.33077	-0.141611	1.28741	-0.0817557	1.0455	-0.324887	1.32637	-0.0920341	1.2817	-0.197231	1.04773	-0.278865	2.67084	4.23258	7.18927	2.72707	2.47335	2.52573	16	1.1863	1.28356	1.52551	1.45616	1.72534	2.24932	BB
139	UT547	202794570013_R06C01	H0301	FAC279	BXD83	CD	1.51093	553	2011-03-02	2011-12-13	2012-03-26	2012-09-05		F	286			22.3	23.3	1	21.4	14.9	2.3	1.33299	-0.129304	1.6432	0.282566	1.76264	0.401473	1.74111	0.331901	1.75966	0.291485	1.40365	0.086423	2.65272	4.21487	7.17387	2.66527	2.45829	2.52096	<5							DD
140	UT548	202794570013_R01C02	H0680	FAC629	BXD40	CD	1.57923	578	2011-11-19	2012-07-23	2012-08-15	2013-06-19		F	247			28.9	28.9	0	29.13	9.9	1.5	1.39288	-0.132464	1.51829	0.104329	1.4924	0.0736374	1.75131	0.28469	1.31882	-0.21661	1.62863	0.252879	2.6691	4.23161	7.18859	2.69355	2.45712	2.52624	14	0.731507	1.25616	1.76751	1.8411	2.26575	2.6	BB
141	UT549	202794570013_R02C02	H0679	FAC628	BXD40	CD	1.57923	578	2011-11-19	2012-07-23	2012-08-15	2013-06-19		F	247			25.7	26.1	0.4	26.33	9.1	1.6	1.48355	-0.0417901	1.43961	0.0256519	1.50584	0.0870703	1.64771	0.181093	1.40877	-0.126655	1.44418	0.0684249	2.6656	4.22674	7.18357	2.71426	2.45112	2.51573	14	0.731507	1.25616	1.76751	1.8411	2.26575	2.6	BB
142	UT563	202794570013_R03C02	H1058	FAC900	BXD40	CD	0.989071	362	2013-04-25	2013-08-09	2013-10-02	2014-04-22		F	106			22	24.2	2.2	24.92	12.2	1.6	0.954163	-0.0264038	0.979951	0.0267584	0.927169	0.00601512	1.21898	0.248356	0.728112	-0.22625	1.04063	0.170542	2.66556	4.22642	7.18502	2.68061	2.41685	2.52277	14	0.731507	1.25616	1.76751	1.8411	2.26575	2.6	BB
143	UT564	202794570013_R04C02	H0699	FAC645	BXD48a	HFD	1.48361	543	2011-12-25	2012-07-23	2012-08-15	2013-06-20	2012-07-20	F	211	208	3	27.4	33.3	5.9	45.04	10.9	1.8	1.52972	0.0926467	1.37971	0.040412	1.14955	-0.188589	1.24823	-0.138022	1.41762	-0.0236554	1.07313	-0.220692	2.69116	4.25644	7.21346	2.77252	2.52486	2.53294	16	1.16164	1.48767	1.75068	1.81781	1.97123	2.19178	BB
144	UT566	202794570013_R05C02	H0330	FAC308	BXD77	HFD	1.97541	723	2011-10-24	2011-12-13	2012-03-26	2013-10-16	2012-02-13	F	50	112	-62	20.3	24	3.7	45.46	12.8	2.1	1.86976	-0.0212956	1.76346	0.0401885	1.93766	0.18485	1.8142	0.0146217	2.1209	0.195405	2.03735	0.322144	2.66964	4.23157	7.18786	2.77099	2.49665	2.51008	11	1.20822	1.6137	1.93524	1.86575	2.30959	2.52877	DD
145	UT567	202794570013_R06C02	H1216	FAC1058	B6D2F1	HFD	1.10383	404	2013-03-15	2013-08-09	2013-10-02	2014-04-23	2013-08-08	M	147	146	1	34.4	46.7	12.3	64.2	11.4	4.9	1.17791	0.0914092	1.03592	-0.00686788	1.11422	0.0963053	1.0676	0.000531959	1.11476	0.0474141	0.973267	0.00485303	2.64011	4.20252	7.16089	2.60968	2.46627	2.50131	<5							Het
146	UT570	202794570002_R01C01	H2040	FAC1581	BXD40	CD	1.96448	719	2014-10-04	2015-02-06	2015-03-11	2016-09-22		F	125			23.5	25.2	1.7	31.45			1.7143	-0.166661	1.56381	-0.150929	1.61543	-0.128163	1.76873	-0.0216649	1.74121	-0.173527	1.78383	0.0779945	2.68832	4.25254	7.20837	2.74859	2.49115	2.54381	14	0.731507	1.25616	1.76751	1.8411	2.26575	2.6	BB
147	UT577	202794570002_R02C01	H0069	FAC058	BXD48a	CD	1.14481	419	2011-03-17	2011-10-26	2012-03-26	2012-05-09		F	223			25.2	24.3	-0.9	24.04	7.9	1.5	0.954306	-0.170022	0.881105	-0.193679	0.94188	-0.110589	0.947828	-0.153688	0.771339	-0.33636	0.622598	-0.380932	2.64816	4.20627	7.16383	2.71383	2.40729	2.50159	17	1.18904	1.63425	1.85189	1.88767	2.06986	2.4137	BB
148	UT578	202794570002_R03C01	H1411	FAC1192	BXD65b	CD	2.77869	1017	2013-12-10	2014-04-11	2014-05-14	2016-09-22		F	122			20.3	23.8	3.5	16.39			2.6817	0.0491497	2.2911	-0.0593354	2.4379	0.00778638	2.34075	-0.13393	2.58779	-0.128596	2.12915	-0.274316	2.66244	4.22123	7.18111	2.77907	2.46682	2.50435	16	1.46849	1.94178	2.06524	2.08082	2.16918	2.79452	DD
149	UT579	202794570002_R04C01	H1217	FAC1059	B6D2F1	HFD	1.10383	404	2013-03-15	2013-08-09	2013-10-02	2014-04-23	2013-08-08	M	147	146	1	35.5	47.9	12.4	61.22	11.4	4.9	1.0587	-0.027793	0.99774	-0.0450461	1.13592	0.118008	1.07991	0.0128415	1.51614	0.448791	1.07776	0.109349	2.65491	4.21175	7.16847	2.66046	2.46317	2.50889	<5							Het
150	UT580	202794570002_R05C01	H1169	FAC1011	D2B6F1	CD	1.01093	370	2013-04-17	2013-08-09	2013-10-02	2014-04-22		F	114			32.3	32.7	0.4	38.63	10.4	2.3	0.851435	-0.149309	0.959663	-0.0105946	0.847078	-0.0925063	0.889489	-0.0995105	0.884725	-0.0911579	0.775664	-0.113155	2.65801	4.21693	7.17467	2.6653	2.43359	2.51387	9	1.60274	1.82329	2.16925	2.23562	2.38767	2.72877	Het
151	Fast2liver	202794570020_R06C02			BXD199	CD	1.37432	503	2017-04-25	2018-05-18	2018-09-10	2018-09-10		F	388			25.8			22.5			1.33844	0.00225407	1.30334	0.0493684	1.1613	-0.0846853	1.34584	0.0514373	1.20361	-0.130058	1.09701	-0.10317	2.6231	4.18366	7.14015	2.70357	2.45624	2.47121	<5							DD
152	Fast6liver	202794570004_R01C01			BXD176a	CD	1.47814	541	2017-03-18	2018-05-18	2018-09-10	2018-09-10		F	426			26.2			26.1			1.62519	0.193163	1.54975	0.214714	1.59263	0.259105	1.53721	0.155548	1.63087	0.194978	1.058	-0.231134	2.6629	4.22088	7.18009	2.79103	2.43191	2.49188	<5
153	Fast10liver	202794570004_R02C01			BXD219	CD	1.52732	559	2017-02-28	2018-05-18	2018-09-10	2018-09-10		F	444			24.8			23.2			1.21281	-0.264611	1.36493	-0.0085053	1.29873	-0.0762626	1.41794	-0.00505398	1.38188	-0.102433	1.33497	0.0036935	2.64649	4.20502	7.16252	2.69292	2.45533	2.50106	<5							BB
154	Fast11liver	202794570004_R03C01			BXD216	CD	1.31421	481	2017-05-17	2018-05-18	2018-09-10	2018-09-10		F	366			21.9			21.6			1.37583	0.0951326	1.21047	0.00343086	1.2749	0.0795955	1.64721	0.403322	1.12638	-0.148104	1.26316	0.114485	2.67805	4.23558	7.19328	2.75983	2.44126	2.52968	<5							DD
155	Fast13liver	202794570004_R04C01			C57BL/6J	CD	0.97541	357	2017-10-16	2018-06-08	2018-10-08	2018-10-08		F	235			20.9			22.1			0.841626	-0.126331	0.904196	-0.0383303	0.92209	0.0124545	0.889953	-0.0691946	0.813742	-0.12717	0.922596	0.0642107	2.63653	4.19163	7.15007	2.65042	2.37892	2.4872	21	1.59178	2.06438	2.26745	2.27671	2.49452	3.03836	BB
156	Fast14liver	202794570004_R05C01			C57BL/6J	CD	0.97541	357	2017-10-16	2018-06-08	2018-10-08	2018-10-08		F	235			21.5			22.3			0.867319	-0.100638	0.885604	-0.0569221	0.934604	0.0249687	0.819062	-0.140086	0.658187	-0.282724	0.831109	-0.0272765	2.62766	4.18273	7.14012	2.63589	2.34772	2.48152	21	1.59178	2.06438	2.26745	2.27671	2.49452	3.03836	BB
157	Fast16liver	202794570004_R06C01			C57BL/6J	CD	0.97541	357	2017-10-16	2018-06-08	2018-10-08	2018-10-08		F	235			24.1			29.4			1.10411	0.136152	1.16533	0.222807	1.20503	0.295399	1.09716	0.138012	1.07243	0.131521	1.18125	0.32286	2.65268	4.21134	7.1676	2.64051	2.454	2.51113	21	1.59178	2.06438	2.26745	2.27671	2.49452	3.03836	BB
158	Fast17liver	202794570004_R01C02			C57BL/6J	CD	0.97541	357	2017-10-16	2018-06-08	2018-10-08	2018-10-08		F	235			22			23.5			0.925989	-0.0419673	0.643856	-0.298671	0.873048	-0.0365878	0.75141	-0.207737	0.893579	-0.047333	0.736903	-0.121482	2.67184	4.23203	7.18969	2.65762	2.4374	2.52984	21	1.59178	2.06438	2.26745	2.27671	2.49452	3.03836	BB
159	Fast18liver	202794570004_R02C02			C57BL/6J	CD	0.97541	357	2017-10-16	2018-06-08	2018-10-08	2018-10-08		F	235			22.4			25.8			1.09151	0.123548	1.09009	0.147567	1.20072	0.291081	0.968461	0.00931373	0.840298	-0.100614	1.26148	0.403091	2.65722	4.21564	7.17506	2.63116	2.4264	2.51866	21	1.59178	2.06438	2.26745	2.27671	2.49452	3.03836	BB
160	UT15	203203210144_R01C01	H0927	FAC640	C57BL/6J	CD	2.00546	734	2011-06-17	2012-07-23	2012-08-15	2013-06-20		F	402			25.6	26.9	1.3	28.68	1.3	0.9	1.9083	-0.0104906	1.98587	0.239133	1.99215	0.213995	2.10819	0.283348	1.76109	-0.193996	2.059	0.318046	2.69887	4.2714	7.22815	2.77286	2.51422	2.53232	21	1.59178	2.06438	2.26745	2.27671	2.49452	3.03836	BB
161	UT16	203203210144_R02C01	H0583	FAC533	BXD79	HFD	1.56011	571	2011-11-26	2012-07-23	2012-08-15	2013-06-19	2012-07-20	F	240	237	3	24	29.2	5.2	41.9	12.7	1.6	1.43135	-0.0763374	1.35885	-0.0401779	1.20721	-0.195432	1.37678	-0.0737667	1.83423	0.317638	1.58518	0.225818	2.66994	4.23594	7.19394	2.75537	2.45552	2.50711	7	1.63562	1.65205	1.82583	1.75068	2.00548	2.17534	DD
162	UT24	203203210144_R03C01	H0170	FAC155	BXD60	CD	1.44809	530	2011-09-01	2011-11-14	2012-03-26	2013-02-12		F	74			35	40.3	5.3	43.42	14.4	2.3	1.57706	0.172778	1.56935	0.257786	1.35349	0.0453014	1.48422	0.12782	1.8419	0.435594	1.52021	0.256822	2.67452	4.24125	7.19868	2.73894	2.47551	2.51692	19	1.07397	1.59726	1.91911	1.94521	2.36164	2.5863	DD
163	UT30	203203210144_R04C01	H0171	FAC156	BXD60	CD	1.44809	530	2011-09-01	2011-11-14	2012-03-26	2013-02-12		F	74			25.8	25.2	-0.6	24.14	2.5	0.4	1.54289	0.138609	1.60396	0.292387	1.63467	0.326485	1.66953	0.313132	1.59023	0.183929	1.56049	0.297103	2.71383	4.28778	7.24397	2.83666	2.65922	2.54622	19	1.07397	1.59726	1.91911	1.94521	2.36164	2.5863	DD
164	UT40	203203210144_R05C01	H0591	FAC541	BXD69	CD	1.52459	558	2011-12-09	2012-07-23	2012-08-15	2013-06-19		F	227			24.8	29.3	4.5	33.33	11.7	1.8	1.45614	-0.0187618	1.42394	0.0526469	1.38757	0.0148842	1.54281	0.122111	1.6379	0.156277	0.926823	-0.40211	2.68509	4.25485	7.21094	2.70943	2.46817	2.5321	12	1.53973	1.7226	1.98288	1.93014	2.33219	2.44658	DD
165	UT41	203203210144_R06C01	H0582	FAC532	BXD79	HFD	1.56011	571	2011-11-26	2012-07-23	2012-08-15	2013-06-19	2012-07-20	F	240	237	3	28.7	39.7	11	55.97	10.8	1.4	1.40639	-0.101302	1.31216	-0.086871	1.20594	-0.196697	1.31762	-0.132928	1.72702	0.21042	1.69917	0.339798	2.68682	4.25799	7.21427	2.72773	2.48435	2.54202	7	1.63562	1.65205	1.82583	1.75068	2.00548	2.17534	DD
166	UT48	203203210144_R01C02	H1301	FAC1100	C57BL/6J	HFD	0.565574	207	2013-03-24	2013-08-09	2013-10-02	2013-10-17	2013-08-08	F	138	137	1	21.5	27.9	6.4	31.83	20.1	3.1	0.558189	-0.0314505	0.593655	-0.0288927	0.601395	0.0373236	0.746255	0.131546	0.555048	0.0176537	0.602662	0.0954311	2.67186	4.23879	7.19511	2.66708	2.38452	2.52518	26	1.36438	1.78219	1.93846	1.97123	2.09384	2.75068	BB
167	UT58	203203210144_R02C02	H0469	FAC430	BXD101	CD	0.60929	223	2011-10-01	2011-12-14	2012-03-26	2012-05-11		F	74			22.8	24.8	2	26.54	11.9	2.7	0.518953	-0.11104	0.644055	-0.0126235	0.476268	-0.124664	0.578824	-0.0726256	0.490676	-0.08976	0.461059	-0.0836286	2.66917	4.23428	7.19306	2.6753	2.3936	2.52213	14	1.26849	1.53562	1.9546	1.94521	2.36438	2.66027	DD
168	UT61	203203210144_R03C02	H0468	FAC429	BXD101	CD	0.60929	223	2011-10-01	2011-12-14	2012-03-26	2012-05-11		F	74			24.3	25.9	1.6	26.79	9.5	3.2	0.544685	-0.0853084	0.685443	0.0287644	0.485808	-0.115123	0.649671	-0.00177783	0.575774	-0.00466279	0.571972	0.0272851	2.67248	4.23964	7.19541	2.68761	2.4099	2.52299	14	1.26849	1.53562	1.9546	1.94521	2.36438	2.66027	DD
169	UT63	203203210144_R04C02	H0549	FAC499	BXD87	CD	0.546448	200	2012-02-19	2012-07-23	2012-08-15	2012-09-06		F	155			20.6	21.6	1	21.8	13.3	2.9	0.476344	-0.0956405	0.571488	-0.0361274	0.356274	-0.191671	0.573299	-0.0253358	0.411515	-0.107048	0.377695	-0.113148	2.65417	4.22022	7.1776	2.67109	2.36042	2.50564	5	1.88767	2.01096	2.22301	2.16438	2.46438	2.74521	DD
170	UT64	203203210144_R05C02	H0526	FAC482	C57BL/6J	CD	0.587432	215	2012-02-04	2012-07-23	2012-08-15	2012-09-06		F	170			20.6	21.8	1.2	22.8	4.1	0.5	0.528644	-0.081172	0.624846	-0.0147672	0.588438	0.0059367	0.683413	0.0503338	0.538872	-0.0200434	0.621763	0.0958039	2.66428	4.23141	7.18959	2.66853	2.40441	2.51307	21	1.59178	2.06438	2.26745	2.27671	2.49452	3.03836	BB
171	UT65	203203210144_R06C02	H0550	FAC500	BXD87	CD	0.546448	200	2012-02-19	2012-07-23	2012-08-15	2012-09-06		F	155			20.7	21.4	0.7	20.6	14.2	1.8	0.440578	-0.131407	0.504364	-0.103251	0.40053	-0.147415	0.519919	-0.0787164	0.426771	-0.091793	0.373242	-0.117602	2.67564	4.24329	7.20013	2.66729	2.38214	2.54125	5	1.88767	2.01096	2.22301	2.16438	2.46438	2.74521	DD
172	UT66	203203210104_R01C01	H0243	FAC225	BXD87	HFD	0.65847	241	2011-09-12	2011-11-15	2012-03-26	2012-05-10	2012-02-13	F	64	154	-90	22.6	29.6	7	34.91	12.7	2.8	0.688693	0.013302	0.649815	-0.0452611	0.496071	-0.146328	0.690195	-0.00258644	0.464876	-0.163982	0.518129	-0.0686972	2.65143	4.21618	7.17238	2.69314	2.36615	2.49748	7	1.06575	1.16438	1.59726	1.70411	1.91233	2.35616	DD
173	UT67	203203210104_R02C01	H1512	FAC1296	BXD70	CD	0.97541	357	2013-12-23	2014-04-11	2014-05-13	2014-12-15		F	109			21.4	22.4	1	23.91	11.1	1.6	0.686553	-0.281404	0.851543	-0.090983	0.750919	-0.158716	0.853369	-0.105779	0.858588	-0.0823234	0.891271	0.0328852	2.66957	4.23374	7.18987	2.67476	2.39577	2.52989	20	1.19452	1.69863	2.01904	2.06575	2.43904	2.5726	BB
174	UT70	203203210104_R03C01	H1589	FAC1354	C57BL/6J	CD	0.986339	361	2014-02-03	2014-06-12	2014-07-23	2015-01-30		M	129			25.7	28.8	3.1	30.42	15.6	2.3	1.01236	0.0343159	1.08119	0.130136	1.01819	0.0993419	1.1473	0.17897	1.1041	0.15243	0.992146	0.124397	2.66385	4.22778	7.18487	2.63944	2.4627	2.51422	<5							BB
175	UT73	203203210104_R04C01	H1406	FAC1187	BXD65b	HFD	1.03825	380	2014-01-15	2014-04-11	2014-05-13	2015-01-30	2014-04-11	F	86	86	0	19.8	36.3	16.5	79.2	9.5	4	1.54644	0.52047	1.25062	0.259026	1.50392	0.5413	1.25857	0.246608	1.63904	0.636256	1.3823	0.470066	2.65995	4.22521	7.18359	2.726	2.46062	2.50058	11	1.23288	1.49315	1.6411	1.60274	1.79452	2.11507	DD
176	UT75	203203210104_R05C01	H1593	FAC1358	BXD40	HFD	0.978142	358	2013-12-22	2014-06-12	2014-07-24	2014-12-15	2014-06-12	F	172	172	0	20.7	27.9	7.2	30.05	5.4	0.4	0.868074	-0.102405	0.898988	-0.0456715	0.864894	-0.0470446	1.07506	0.113613	0.807351	-0.136251	0.924676	0.0639489	2.66879	4.23735	7.19554	2.75087	2.46208	2.50759	10	0.69589	1.13493	1.30904	1.2411	1.48356	2.05479	BB
177	UT79	203203210104_R06C01	H1733	FAC1422	BXD79	HFD	0.467213	171	2014-05-27	2014-07-25	2014-09-09	2014-11-14	2014-07-25	F	59	59	0	17.1	26.6	9.5	37.88	14.5	3.1	0.484351	-0.0144921	0.540717	-0.00503559	0.428369	-0.0527677	0.467742	-0.0643013	0.385561	-0.0549889	0.503736	0.0807821	2.66472	4.23016	7.18733	2.6873	2.37337	2.51862	7	1.63562	1.65205	1.82583	1.75068	2.00548	2.17534	DD
178	UT81	203203210104_R01C02	H1781	FAC1209	BXD79	HFD	0.827869	303	2014-01-14	2014-04-11	2014-05-14	2014-11-13	2014-04-11	F	87	87	0	19.9	32.8	12.9	39.86	12.5	1.5	0.994439	0.162677	0.963969	0.136635	0.766754	-0.0184784	0.947398	0.112248	0.946184	0.150538	1.05019	0.318221	2.65736	4.22649	7.18282	2.71885	2.39151	2.50087	7	1.63562	1.65205	1.82583	1.75068	2.00548	2.17534	DD
179	UT84	203203210104_R02C02	H1683	FAC1371	BXD79	HFD	0.483607	177	2014-04-30	2014-07-25	2014-09-09	2014-10-24	2014-07-25	F	86	86	0	20.3	27.6	7.3	38.03	16	2.2	0.501851	-0.0121248	0.56861	0.0100576	0.445671	-0.0492877	0.536451	-0.00936991	0.40233	-0.0543608	0.59529	0.15829	2.66267	4.22907	7.18581	2.6845	2.38013	2.51204	7	1.63562	1.65205	1.82583	1.75068	2.00548	2.17534	DD
180	UT86	203203210104_R03C02	H1684	FAC1372	BXD79	HFD	0.483607	177	2014-04-30	2014-07-25	2014-09-09	2014-10-24	2014-07-25	F	86	86	0	21.4	32	10.6	43.95	12.8	1.5	0.483711	-0.0302654	0.492372	-0.0661798	0.402712	-0.0922467	0.513019	-0.0328022	0.434299	-0.022392	0.490265	0.0532647	2.65473	4.2199	7.17765	2.68085	2.36192	2.50553	7	1.63562	1.65205	1.82583	1.75068	2.00548	2.17534	DD
181	UT89	203203210104_R04C02	H1190	FAC1032	BXD100	CD	1.54918	567	2013-04-25	2013-08-09	2013-10-02	2014-11-13		F	106			25	27.2	2.2	29.4	9.2	1.8	1.4515	-0.0461029	1.58727	0.196773	1.38393	-0.00949449	1.38701	-0.0543515	1.73313	0.227296	1.68143	0.331431	2.67828	4.24428	7.20181	2.73315	2.47091	2.51486	22	1.18356	1.57808	2.03425	2.22055	2.33425	2.93699	BB
182	UT94	203203210104_R05C02	H1037	FAC879	BXD29	HFD	1.72131	630	2013-02-21	2013-08-09	2013-10-02	2014-11-13	2013-08-08	F	169	168	1	26.1	33.7	7.6	46.02	7.4	1.2	2.02441	0.367917	1.6801	0.155211	1.42612	-0.112437	1.83345	0.247429	2.16963	0.494316	1.75861	0.261126	2.67576	4.24234	7.19921	2.77516	2.46808	2.50801	15	1.5863	1.84658	2.0453	2.05479	2.26301	2.37534	DD
183	UT97	203203210104_R06C02	H1425	FAC1206	BXD101	CD	0.953552	349	2013-11-30	2014-04-11	2014-05-14	2014-11-14		F	132			25.9	28.8	2.9	37.09	11.3	1.4	0.759914	-0.187866	0.965253	0.0397921	0.797277	-0.093928	1.1011	0.160321	1.13862	0.219226	0.959587	0.11993	2.66418	4.22834	7.18371	2.7199	2.41356	2.50999	14	1.26849	1.53562	1.9546	1.94521	2.36438	2.66027	DD
184	UT98	203203210142_R01C01	H2127	FAC1665	BXD66	CD	0.502732	184	2014-10-22	2015-02-06	2015-03-11	2015-04-24		F	107			24.4	27	2.6	27.36	8.1	2.4	0.496552	-0.0350786	0.542996	-0.0304886	0.54012	0.029035	0.518134	-0.0437612	0.399026	-0.0764959	0.382023	-0.0713645	2.6644	4.23253	7.1903	2.65593	2.37623	2.53072	6	1.56712	1.57534	1.74429	1.76301	1.88973	1.91233	DD
185	UT99	203203210142_R02C01	H2128	FAC1666	BXD66	CD	0.502732	184	2014-10-22	2015-02-06	2015-03-11	2015-04-24		F	107			22.7	25.5	2.8	29.16	6.1	2.6	0.386681	-0.14495	0.534425	-0.0390598	0.448449	-0.0626362	0.49147	-0.0704251	0.477784	0.00226191	0.41858	-0.0348069	2.65236	4.21915	7.17629	2.67963	2.36192	2.50464	6	1.56712	1.57534	1.74429	1.76301	1.88973	1.91233	DD
186	UT100	203203210142_R03C01	H1558	FAC1340	BXD66	CD	0.967213	354	2013-12-26	2014-04-11	2014-05-14	2014-12-15		F	106			19	21	2	21.58	9	3.2	0.977512	0.0171213	1.20473	0.268604	0.841508	-0.0612161	0.832494	-0.119765	0.836252	-0.0965897	0.853829	0.00246609	2.67122	4.23694	7.19555	2.76582	2.56338	2.51415	6	1.56712	1.57534	1.74429	1.76301	1.88973	1.91233	DD
187	UT101	203203210142_R04C01	H0235	FAC217	BXD60	CD	0.642077	235	2011-09-17	2011-11-15	2012-03-26	2012-05-09		F	59			33.3	34	0.7	32.85	11.2	1.3	0.670038	0.00977909	0.73363	0.0513524	0.778442	0.149866	0.687621	0.0086168	0.539422	-0.0732955	0.570616	-0.00216318	2.65627	4.2224	7.1806	2.69609	2.40778	2.51058	19	1.07397	1.59726	1.91911	1.94521	2.36164	2.5863	DD
188	UT102	203203210142_R05C01	H0224	FAC206	BXD66	CD	0.65847	241	2011-09-12	2011-11-15	2012-03-26	2012-05-10		F	64			18	18.5	0.5	19.25	8.1	2.1	0.444513	-0.230878	0.682022	-0.0130544	0.60083	-0.0415689	0.724305	0.0315229	0.46717	-0.161688	0.459499	-0.127327	2.63998	4.20167	7.15734	2.66096	2.34846	2.4977	6	1.56712	1.57534	1.74429	1.76301	1.88973	1.91233	DD
189	UT105	203203210142_R06C01	H0222	FAC204	BXD66	CD	0.65847	241	2011-09-12	2011-11-15	2012-03-26	2012-05-10		F	64			21.6	25.5	3.9	23.98	10.6	2.1	0.630702	-0.0446897	0.717093	0.0220169	0.532748	-0.109652	0.70168	0.00889779	0.599351	-0.0295074	0.572835	-0.0139908	2.65953	4.22283	7.18062	2.6668	2.39054	2.52041	6	1.56712	1.57534	1.74429	1.76301	1.88973	1.91233	DD
190	UT106	203203210142_R01C02	H0234	FAC216	BXD60	CD	0.642077	235	2011-09-17	2011-11-15	2012-03-26	2012-05-09		F	59			33.5	39.2	5.7	22.88	10.1	1.9	0.648149	-0.0121096	0.714631	0.0323539	0.702808	0.0742314	0.709023	0.0300191	0.490945	-0.121773	0.559937	-0.0128427	2.65299	4.21364	7.16972	2.68	2.40181	2.50435	19	1.07397	1.59726	1.91911	1.94521	2.36164	2.5863	DD
191	UT117	203203210142_R02C02	H1187	FAC1029	BXD100	HFD	1.46721	537	2012-11-18	2013-08-09	2013-10-02	2014-05-09	2013-08-08	F	264	263	1	36	50.8	14.8	69.43	12.6	2.9	1.39943	-0.0225069	1.42236	0.0958567	1.49526	0.170945	1.40774	0.0352686	1.81375	0.388617	1.681	0.401233	2.68638	4.25654	7.21714	2.74204	2.48664	2.52022	15	1.09589	1.56986	1.73753	1.73699	1.92603	2.44384	BB
192	UT119	203203210142_R03C02	H1193	FAC1035	BXD100	HFD	0.991803	363	2013-04-25	2013-08-09	2013-10-02	2014-04-23	2013-08-08	F	106	105	1	28	48	20	82.47	12.6	3.6	1.18572	0.202629	1.07685	0.12152	1.0357	0.112243	0.977655	0.00472994	1.24973	0.292676	1.30443	0.432	2.68542	4.25324	7.2112	2.71057	2.4675	2.53104	15	1.09589	1.56986	1.73753	1.73699	1.92603	2.44384	BB
193	UT128	203203210142_R04C02	H0480	FAC240	BXD100	CD	2.03005	743	2011-10-05	2011-11-15	2012-03-26	2013-10-17		F	41			20.7	22	1.3	25.26	9.2	1.6	1.696	-0.245488	1.76319	-0.00275023	1.83828	0.0393982	1.72973	-0.115772	1.63375	-0.345547	1.90331	0.14129	2.70066	4.26891	7.22674	2.75725	2.49193	2.53384	22	1.18356	1.57808	2.03425	2.22055	2.33425	2.93699	BB
194	UT129	203203210142_R05C02	H1147	FAC989	DBA/2J	CD	0.579235	212	2013-03-19	2013-08-09	2013-10-02	2013-10-17		F	143			24.3	26.6	2.3	29.18	14	1.5	0.45205	-0.1502	0.592682	-0.0405317	0.517404	-0.0581859	0.628296	0.00210523	0.360593	-0.190252	0.493321	-0.0256152	2.68575	4.25054	7.20678	2.69161	2.42789	2.54674	28	0.884932	1.52808	1.78552	1.82055	2.18493	2.48767	DD
195	UT130	203203210142_R06C02	H1297	FAC1056	BXD100	CD	1.02186	374	2012-10-08	2013-08-09	2013-10-02	2013-10-17		F	305			30.9	32.8	1.9	34.3	15.2	0.9	0.75111	-0.259722	0.95355	-0.025241	0.789609	-0.15919	0.82649	-0.171694	0.830162	-0.156482	1.04744	0.149258	2.67928	4.24384	7.20094	2.67972	2.43568	2.53814	22	1.18356	1.57808	2.03425	2.22055	2.33425	2.93699	BB
196	UT131	203203210105_R01C01	H1213	FAC1055	BXD100	CD	1.02186	374	2012-10-08	2013-08-09	2013-10-02	2013-10-17		F	305			36.1	36.4	0.3	35.23	14.8	2.2	0.791765	-0.219068	0.92599	-0.0528006	0.835296	-0.113503	0.879052	-0.119132	0.827488	-0.159155	1.16971	0.27153	2.67432	4.24195	7.19943	2.69384	2.44053	2.52201	22	1.18356	1.57808	2.03425	2.22055	2.33425	2.93699	BB
197	UT137	203203210105_R02C01	H1524	FAC1311	BXD98	CD	1.04918	384	2014-01-11	2014-04-11	2014-05-14	2015-01-30		F	90			14.7	17.8	3.1	22.32	12.3	1.4	0.596065	-0.439989	0.954995	-0.0451273	0.735812	-0.236025	0.863133	-0.158014	0.785325	-0.22822	0.729851	-0.191742	2.66429	4.23022	7.18795	2.66256	2.4166	2.52123	12	1.08219	1.35411	1.70753	1.78904	2.06164	2.20822	BB
198	UT138	203203210105_R03C01	H1095	FAC937	BXD90	HFD	1.97541	723	2012-12-22	2013-08-09	2013-10-02	2014-12-15	2013-08-08	F	230	229	1	28.7	41.2	12.5	38.9	14.8	2.5	1.50973	-0.381321	2.11694	0.393662	1.87387	0.121057	1.67557	-0.12401	0.691871	-1.23362	2.04862	0.333417	2.74208	4.31609	7.2747	2.87668	2.58022	2.56363	13	0.917808	1.11507	1.55448	1.58356	2.07945	2.28493	BB
199	UT139	203203210105_R04C01	H1916	FAC1278	BXD102	HFD	1	366	2013-12-14	2014-04-11	2014-05-13	2014-12-15	2014-04-11	F	118	118	0	20.1	23	2.9	36.26	13.3	2.5	0.887675	-0.102981	0.991973	0.0302476	0.862821	-0.0675482	0.975632	-0.0041819	0.874727	-0.0903957	0.91952	0.0400656	2.67367	4.24106	7.19833	2.72036	2.45318	2.51483	13	1.21096	1.81233	2.08325	2.02466	2.5274	2.6	BB
200	UT144	203203210105_R05C01	H1594	FAC1359	BXD40	HFD	0.978142	358	2013-12-22	2014-06-12	2014-07-24	2014-12-15	2014-06-12	F	172	172	0	22.9	30.2	7.3	34.11	17.2	3.5	0.739496	-0.230983	0.908987	-0.0356726	0.885393	-0.0265465	1.04806	0.0866157	0.901376	-0.0422259	1.05086	0.19013	2.68059	4.24679	7.20124	2.72861	2.44589	2.52538	10	0.69589	1.13493	1.30904	1.2411	1.48356	2.05479	BB
201	UT147	203203210105_R06C01	H1143	FAC985	DBA/2J	HFD	1.5	549	2013-03-19	2013-08-09	2013-10-02	2014-09-19	2013-08-08	F	143	142	1	25.4	36.6	11.2	43.87	6	1.9	1.07532	-0.376886	1.19615	-0.155948	1.02623	-0.325727	1.25535	-0.14468	1.2635	-0.19391	1.38582	0.0779603	2.70732	4.27575	7.23405	2.77282	2.5026	2.55752	19	1.36986	1.60274	1.80058	1.85205	2.01918	2.23562	DD
202	UT154	203203210105_R02C02	H2091	FAC1631	BXD63	HFD	2.05464	752	2014-10-05	2015-02-06	2015-03-11	2016-10-26	2015-02-06	F	124	124	0	22.9	29.4	6.5	50.21			1.81773	-0.146458	1.72757	-0.057569	1.56542	-0.254197	1.76226	-0.103911	1.46055	-0.542957	1.88023	0.0971359	2.72196	4.29481	7.25128	2.84946	2.5843	2.54694	11	1.5726	1.8274	2.03935	2.10411	2.25753	2.43562	BB
203	UT155	203203210105_R03C02	H2494	FAC2057	BXD32	CD	1.05464	386	2015-08-12	2016-01-14	2016-02-17	2016-09-01		F	155			25.7	29.2	3.5	30.88			1.31537	0.274276	1.1383	0.133909	1.22881	0.25237	1.21637	0.190633	1.14611	0.127186	0.93985	0.0135746	2.67165	4.23851	7.19713	2.75791	2.4798	2.50648	12	1.77534	1.86164	2.1468	2.22055	2.36164	2.63836	DD
204	UT156	203203210105_R04C02	H1741	FAC1198	BXD63	CD	0.939891	344	2014-01-05	2014-04-11	2014-05-13	2014-12-15		F	96			21.2	25.6	4.4	29.24	7	0.7	0.775595	-0.159574	0.807162	-0.107633	0.725444	-0.154242	0.91065	-0.0186467	0.951645	0.0457045	0.925109	0.0971572	2.68815	4.25698	7.21335	2.71131	2.45463	2.53066	7	1.61644	1.74521	2.06536	2.04932	2.31781	2.5863	BB
205	UT158	203203210105_R05C02	H1424	FAC1205	BXD101	CD	0.953552	349	2013-11-30	2014-04-11	2014-05-14	2014-11-14		F	132			27.5	29.9	2.4	35.51	17.5	1.9	0.828631	-0.119149	1.09073	0.165267	0.861709	-0.0294958	1.09131	0.150537	0.914641	-0.00474979	0.94893	0.109273	2.69066	4.26138	7.21829	2.75563	2.49556	2.52657	14	1.26849	1.53562	1.9546	1.94521	2.36438	2.66027	DD
206	UT159	203203210105_R06C02	H1818	FAC1449	DBA/2J	CD	2.08743	764	2014-07-30	2014-10-22	2014-11-10	2016-09-01		F	84			17.2	19.1	1.9	24.57			1.63381	-0.36065	1.63966	-0.171073	1.73065	-0.116612	1.74652	-0.147202	1.79948	-0.236305	1.60562	-0.205569	2.69867	4.26879	7.2251	2.7886	2.50377	2.53449	28	0.884932	1.52808	1.78552	1.82055	2.18493	2.48767	DD
207	UT160	203524370005_R01C01	H1560	FAC1342	BXD66	HFD	1.00273	367	2013-12-13	2014-04-11	2014-05-14	2014-12-15	2014-04-11	F	119	119	0	14.2	30.3	16.1	53.39	8.6	1.6	0.87081	-0.122368	0.899014	-0.0648446	0.769549	-0.163123	0.777708	-0.204403	0.949565	-0.018248	0.893446	0.0116496	2.66253	4.21989	7.17686	2.74269	2.39841	2.50897	7	1.19178	1.38082	1.79022	1.79178	2.28219	2.57534	DD
208	UT166	203524370005_R03C01	H1436	FAC1217	BXD62	CD	0.964481	353	2013-12-27	2014-04-11	2014-05-14	2014-12-15		F	105			18.7	20.6	1.9	23.07	4.1	0.5	0.862361	-0.0955076	0.861775	-0.072219	1.00633	0.105915	0.900547	-0.0494155	1.03602	0.105865	0.687114	-0.161907	2.68843	4.2507	7.20749	2.71898	2.46938	2.53549	10	1.44932	1.73493	1.99808	1.99589	2.19795	2.53973	DD
209	UT174	203524370005_R04C01	H1713	FAC1401	BXD65b	HFD	0.47541	174	2014-05-03	2014-07-25	2014-09-08	2014-10-24	2014-07-25	F	83	83	0	23.7	40.2	16.5	38.95	9.9	1.2	0.63924	0.13283	0.583975	0.0318221	0.577894	0.0898463	0.55456	0.0156274	0.41025	-0.0383708	0.460134	0.030157	2.65669	4.22168	7.1767	2.67112	2.3917	2.51146	11	1.23288	1.49315	1.6411	1.60274	1.79452	2.11507	DD
210	UT176	203524370005_R05C01	H1843	FAC1474	BXD61	HFD	1.43169	524	2014-07-09	2014-10-22	2014-11-10	2015-12-15	2014-10-22	F	105	105	0	21.6	25.9	4.3	58.54			1.73993	0.35078	1.49072	0.191947	1.41385	0.11949	1.52772	0.185095	1.79718	0.407019	1.67013	0.420791	2.67751	4.24053	7.19746	2.74886	2.47452	2.52652	8	1.5726	1.81507	2.01986	2.00274	2.24384	2.57534	DD
211	UT177	203524370005_R06C01	H2349	FAC1910	BXD29	HFD	0.497268	182	2015-06-16	2015-11-03		2015-12-15	2015-11-03	F	140	140	0	25.4			29.07			0.535313	0.00872641	0.543739	-0.0254793	0.471815	-0.0346625	0.609516	0.0522139	0.586551	0.116409	0.477248	0.0285426	2.64932	4.20932	7.16523	2.66445	2.3623	2.50803	15	1.5863	1.84658	2.0453	2.05479	2.26301	2.37534	DD
212	UT179	203524370005_R01C02	H2252	FAC1810	BXD98	CD	1.45082	531	2014-07-03	2015-08-05	2015-10-06	2015-12-16		F	398			24.3	24.1	-0.2	23.46			0.945215	-0.46159	1.27757	-0.0361331	1.00082	-0.309671	1.30013	-0.0585696	1.23952	-0.169474	1.18169	-0.0840398	2.68389	4.24519	7.20532	2.74781	2.47722	2.52989	12	1.08219	1.35411	1.70753	1.78904	2.06164	2.20822	BB
213	UT183	203524370005_R03C02	H2148	FAC1694	BXD61	HFD	0.994536	364	2014-12-17	2015-03-13	2015-05-13	2015-12-16	2015-03-13	F	86	86	0	18.8	29.3	10.5	47.55			0.967589	-0.0180225	0.987204	0.0297454	0.912391	-0.0133707	0.975553	0.000331462	0.910906	-0.0488361	0.979732	0.104959	2.69937	4.26707	7.22286	2.7646	2.50117	2.53943	8	1.5726	1.81507	2.01986	2.00274	2.24384	2.57534	DD
214	UT185	203524370005_R04C02	H2076	FAC1616	BXD89	HFD	2.07377	759	2014-09-28	2015-02-06	2015-03-11	2016-10-26	2015-02-06	F	131	131	0	17.4	18.6	1.2	28.59			1.68417	-0.297672	1.62497	-0.1751	1.5394	-0.296347	1.71542	-0.166828	1.4739	-0.54844	1.75853	-0.0409541	2.69009	4.25665	7.21529	2.77986	2.51049	2.52888	9	1.33425	1.91918	2.03744	2.06575	2.31781	2.32877	BB
215	UT186	203524370005_R05C02	H1407	FAC1188	BXD65b	HFD	0.825137	302	2014-01-15	2014-04-11	2014-05-13	2014-11-13	2014-04-11	F	86	86	0	23.1	34.4	11.3	50	9.7	3.3	1.00527	0.176027	0.932074	0.106873	0.954452	0.171523	0.851939	0.0190853	1.12241	0.329454	0.868355	0.138726	2.66909	4.23239	7.1868	2.69784	2.43513	2.52	11	1.23288	1.49315	1.6411	1.60274	1.79452	2.11507	DD
216	UT193	203524370005_R06C02	H2077	FAC1617	BXD89	CD	1.21311	444	2014-09-28	2015-02-06	2015-03-11	2015-12-16		F	131			24.1	25.3	1.2	25.99			1.11761	-0.0697691	1.11187	-0.0162448	1.14729	0.0372245	1.34715	0.188226	0.814771	-0.360181	1.01021	-0.0518452	2.68427	4.25101	7.20894	2.7179	2.45201	2.53496	10	1.74247	1.93425	2.10466	2.10137	2.2	2.67945	BB
217	UT194	203524370001_R01C01	H2149	FAC1695	BXD61	HFD	0.994536	364	2014-12-17	2015-03-13	2015-05-13	2015-12-16	2015-03-13	F	86	86	0	21.4	31.4	10	49.82			1.17852	0.192905	1.10409	0.146635	1.21054	0.28478	1.11767	0.142444	1.56423	0.604483	1.17989	0.305114	2.67682	4.2441	7.20224	2.72868	2.43912	2.52509	8	1.5726	1.81507	2.01986	2.00274	2.24384	2.57534	DD
218	UT199	203524370001_R02C01	H2145	FAC1689	BXD61	CD	0.942623	345	2015-01-05	2015-03-13	2015-05-13	2015-12-16		F	67			22.8	27.1	4.3	30.37			1.06835	0.130663	1.06608	0.149148	0.972391	0.0904007	1.15915	0.227557	0.978495	0.0698644	0.908319	0.0780254	2.66353	4.2292	7.18584	2.72105	2.42828	2.5078	12	1.50959	1.72055	2.071	2.11507	2.37329	2.61918	DD
219	UT200	203524370001_R03C01	H1801	FAC1432	BXD32	CD	1.41257	517	2014-07-16	2014-10-22	2014-11-10	2015-12-15		F	98			24.2	24.4	0.2	32.17			1.50067	0.129174	1.21979	-0.0640487	1.19341	-0.0848257	1.22227	-0.104278	1.06533	-0.306002	1.23102	-0.00192594	2.6649	4.23167	7.18964	2.76916	2.46367	2.49697	12	1.77534	1.86164	2.1468	2.22055	2.36164	2.63836	DD
220	UT202	203524370001_R04C01	H1728	FAC1417	BXD70	HFD	1.57923	578	2014-05-17	2014-07-25	2014-09-09	2015-12-16	2014-07-25	F	69	69	0	21.8	41.9	20.1	71.41			2.08916	0.563812	1.52744	0.113476	1.78373	0.364962	1.70218	0.235563	2.32243	0.787001	2.17018	0.794425	2.71366	4.28266	7.23956	2.76529	2.52357	2.55863	16	1.44932	1.72808	1.83801	1.84521	2.01096	2.12877	BB
221	UT203	203524370001_R05C01	H1481	FAC1262	BXD40	HFD	0.775956	284	2014-02-02	2014-04-11	2014-05-14	2014-11-13	2014-04-11	F	68	68	0	18.2	25.5	7.3	37.43	9.5	2.1	0.859722	0.0758795	0.796353	0.00954948	0.823341	0.0818796	0.840479	0.048958	0.792493	0.0479594	0.862724	0.175234	2.66721	4.23073	7.18878	2.73161	2.42858	2.51027	10	0.69589	1.13493	1.30904	1.2411	1.48356	2.05479	BB
222	UT205	203524370001_R06C01	H2063	FAC1603	BXD61	HFD	2.06011	754	2014-10-03	2015-02-06	2015-03-11	2016-10-26	2015-02-06	F	126	126	0	26.5	34.3	7.8	60.13			2.52875	0.559513	1.97774	0.188336	2.18082	0.356588	1.88116	0.0104015	1.81939	-0.1895	2.45805	0.670277	2.72521	4.29468	7.25226	2.85855	2.60651	2.55038	8	1.5726	1.81507	2.01986	2.00274	2.24384	2.57534	DD
223	UT206	203524370001_R01C02	H1322	FAC1126	BXD39	CD	1.50273	550	2013-04-22	2013-11-15	2014-01-16	2014-10-24		F	207			21.6	22.1	0.5	18.09	8.6	1.6	1.00255	-0.452175	0.916043	-0.438189	0.813014	-0.541247	1.0107	-0.391621	1.12082	-0.339287	0.949538	-0.360667	2.61984	4.17816	7.1311	2.73675	2.34576	2.45264	8	1.33973	1.77192	1.88253	1.99726	2.03014	2.03014	BB
224	UT208	203524370001_R02C02	H1742	FAC1349	BXD95	CD	1.46448	536	2013-04-21	2014-04-11	2014-05-13	2014-10-09		F	355			26.5	26	-0.5	24.79	10.5	2.2	1.09677	-0.322646	1.12964	-0.194731	1.23353	-0.0884802	1.37437	0.0041902	0.769299	-0.653143	1.16505	-0.112378	2.67942	4.24568	7.20405	2.77779	2.43269	2.52187	9	1.11507	1.50822	1.68128	1.67123	1.89726	2.11781	DD
225	UT209	203524370001_R03C02	H2078	FAC1618	BXD89	CD	1.21311	444	2014-09-28	2015-02-06	2015-03-11	2015-12-16		F	131			24	24.5	0.5	25.56			1.09307	-0.0943143	1.15426	0.0261499	1.10212	-0.00794323	1.31613	0.157206	0.938079	-0.236872	1.06001	-0.00204142	2.66352	4.22874	7.18627	2.71601	2.43198	2.50719	10	1.74247	1.93425	2.10466	2.10137	2.2	2.67945	BB
226	UT210	203524370001_R04C02	H2146	FAC1692	BXD61	CD	0.942623	345	2015-01-05	2015-03-13	2015-05-13	2015-12-16		F	67			20.4	24.5	4.1	28.19			0.943417	0.00572591	0.895714	-0.0212139	0.853775	-0.0282155	0.992612	0.0610194	0.710649	-0.197982	0.808286	-0.0220075	2.66781	4.233	7.1897	2.71799	2.4262	2.51376	12	1.50959	1.72055	2.071	2.11507	2.37329	2.61918	DD
227	UT212	203524370001_R05C02	H1802	FAC1433	BXD32	CD	1.41257	517	2014-07-16	2014-10-22	2014-11-10	2015-12-15		F	98			22.2	24.1	1.9	33.51			1.40663	0.0351325	1.33593	0.0520955	1.24319	-0.03505	1.2973	-0.029251	1.27971	-0.0916246	1.21082	-0.0221331	2.66387	4.2271	7.18455	2.75558	2.45721	2.49398	12	1.77534	1.86164	2.1468	2.22055	2.36164	2.63836	DD
228	UT213	203524370001_R06C02	H1689	FAC1377	BXD40	HFD	0.491803	180	2014-04-27	2014-07-25	2014-09-09	2014-10-24	2014-07-25	F	89	89	0	24.7	37.7	13	42.33	13.1	1.5	0.512299	-0.00924381	0.530773	-0.0341792	0.56918	0.0673102	0.640728	0.0880182	0.402757	-0.0620044	0.607971	0.163948	2.68088	4.24748	7.20177	2.70345	2.42632	2.53365	10	0.69589	1.13493	1.30904	1.2411	1.48356	2.05479	BB
229	UT215	203524370002_R01C01	H1420	FAC1201	BXD101	HFD	0.95082	348	2013-11-30	2014-04-11	2014-05-13	2014-11-13	2014-04-11	F	132	132	0	25.8	42.3	16.5	54.56	9.5	3.6	1.02496	0.0797044	1.02732	0.103991	1.14013	0.251225	0.964656	0.0261748	1.27911	0.362408	1.01692	0.1796	2.68526	4.25182	7.20812	2.75252	2.47117	2.52233	14	0.717808	1.00616	1.31624	1.26301	1.68425	2.0274	DD
230	UT216	203524370002_R02C01	H1905	FAC1535	BXD70	HFD	1.43169	524	2014-07-10	2014-10-22	2014-11-10	2015-12-16	2014-10-22	F	104	104	0	22.3	29.8	7.5	47.9			1.55677	0.167625	1.35767	0.0589042	1.426	0.131639	1.32726	-0.0153664	1.52367	0.13351	1.60644	0.357104	2.68179	4.2477	7.20412	2.80358	2.56422	2.51061	16	1.44932	1.72808	1.83801	1.84521	2.01096	2.12877	BB
231	UT217	203524370002_R03C01	H2251	FAC1809	BXD98	CD	1.45082	531	2014-07-03	2015-08-05	2015-10-06	2015-12-16		F	398			24	24.1	0.1	23.26			1.03715	-0.369652	1.34037	0.0266682	1.00542	-0.305072	1.34367	-0.0150263	1.46103	0.0520382	1.17555	-0.0901774	2.64276	4.20597	7.16491	2.74619	2.4373	2.47865	12	1.08219	1.35411	1.70753	1.78904	2.06164	2.20822	BB
232	UT224	203524370002_R06C01	H1565	FAC1348	BXD95	CD	1.46448	536	2013-04-21	2014-04-11	2014-05-13	2014-10-09		F	355			25	25.1	0.1	20.76	7	2	1.27363	-0.145781	1.17657	-0.147795	1.28702	-0.0349898	1.24462	-0.12556	1.11726	-0.30518	1.0115	-0.265933	2.67814	4.245	7.20107	2.77646	2.4506	2.52135	9	1.11507	1.50822	1.68128	1.67123	1.89726	2.11781	DD
233	UT225	203524370002_R01C02	H1362	FAC1177	BXD102	HFD	0.959016	351	2013-11-28	2014-01-13	2014-03-11	2014-11-14	2014-01-13	F	46	46	0	14.2	22.6	8.4	43.07	12.6	1.5	0.899281	-0.0535427	0.883766	-0.0459608	1.02025	0.124441	0.969914	0.0245437	1.13878	0.214012	1.02161	0.177274	2.6911	4.25631	7.21421	2.72894	2.46392	2.53876	13	1.21096	1.81233	2.08325	2.02466	2.5274	2.6	BB
234	UT229	203524370002_R02C02	H1844	FAC1475	BXD62	CD	1.43443	525	2014-07-09	2014-10-22	2014-11-10	2015-12-16		F	105			23.4	25.7	2.3	24.38			1.53062	0.138951	1.47404	0.173136	1.78943	0.49276	1.46411	0.119192	1.73147	0.338615	1.32927	0.0775949	2.70717	4.27449	7.23179	2.76795	2.55786	2.53855	10	1.44932	1.73493	1.99808	1.99589	2.19795	2.53973	DD
235	UT233	203524370002_R03C02	H2452	FAC2015	BXD86	CD	1.02732	376	2015-10-16	2016-01-14	2016-02-17	2016-10-26		F	90			20.8	22.4	1.6	31.77			0.742349	-0.273528	0.95658	-0.0264766	0.828731	-0.124676	0.801035	-0.201741	1.20071	0.208682	0.604095	-0.29877	2.64063	4.20184	7.16017	2.71117	2.38852	2.47197	10	2.21096	2.33151	2.49452	2.46301	2.63562	2.83014	DD
236	UT236	203524370002_R04C02	H1518	FAC1305	BXD51	CD	1.92623	705	2014-01-09	2014-04-11	2014-05-13	2015-12-15		F	92			20.5	21	0.5	26.04			2.07075	0.225094	1.7968	0.111924	2.21835	0.50701	1.95716	0.198913	2.21854	0.341466	1.63726	-0.0358043	2.67393	4.23929	7.19557	2.77145	2.47809	2.50442	9	1.92055	2.21644	2.35008	2.36986	2.52055	2.69315	DD
237	UT238	203524370002_R05C02	H1320	FAC1124	BXD89	HFD	1.47268	539	2013-04-18	2013-11-15	2014-01-16	2014-10-09	2013-11-15	F	211	211	0	25.4	37.8	12.4	45.57	12.3	1.6	1.33939	-0.0875923	1.46432	0.133556	1.64477	0.315855	1.65736	0.280296	1.34589	-0.0846179	1.4144	0.129945	2.67109	4.23513	7.19192	2.74785	2.47038	2.51113	9	1.33425	1.91918	2.03744	2.06575	2.31781	2.32877	BB
238	UT239	203524370002_R06C02	H1321	FAC1125	BXD89	HFD	1.47268	539	2013-04-18	2013-11-15	2014-01-16	2014-10-09	2013-11-15	F	211	211	0	28.8	43.5	14.7	46.04	10.6	1.5	1.80704	0.380061	1.84059	0.509827	1.74672	0.417803	1.84926	0.472192	1.32158	-0.108932	1.78419	0.499738	2.74275	4.3149	7.27191	2.84851	2.5287	2.57655	9	1.33425	1.91918	2.03744	2.06575	2.31781	2.32877	BB
239	UT240	203203210143_R01C01	H1688	FAC1376	BXD40	HFD	0.491803	180	2014-04-27	2014-07-25	2014-09-09	2014-10-24	2014-07-25	F	89	89	0	24.1	35	10.9	38.27	12.2	3.3	0.542199	0.0206568	0.598382	0.0334299	0.581954	0.0800843	0.723101	0.170391	0.451978	-0.0127836	0.617176	0.173153	2.66892	4.23453	7.19051	2.70821	2.41219	2.51887	10	0.69589	1.13493	1.30904	1.2411	1.48356	2.05479	BB
240	UT242	203203210143_R02C01	H1358	FAC1170	BXD102	HFD	1.48634	544	2013-04-28	2014-01-13	2014-03-11	2014-10-24	2014-01-13	F	260	260	0	27.2	41.4	14.2	52.31	11.3	2.3	1.33523	-0.104358	1.32146	-0.0199733	1.461	0.120567	1.59044	0.201892	1.46371	0.019745	1.55472	0.258562	2.65731	4.22111	7.17741	2.74405	2.44794	2.49325	13	1.21096	1.81233	2.08325	2.02466	2.5274	2.6	BB
241	UT243	203203210143_R03C01	H1826	FAC1457	BXD45	CD	1.38525	507	2014-07-26	2014-10-22	2014-11-10	2015-12-15		F	88			19.4	20.6	1.2	24.64			1.07105	-0.275227	1.3256	0.0630994	1.32215	0.0669484	1.32903	0.0254416	1.15814	-0.186293	0.77602	-0.43352	2.67726	4.24208	7.20026	2.74232	2.42834	2.50509	6	1.74521	1.86438	2.07123	2.07534	2.30753	2.32603	DD
242	UT244	203203210143_R04C01	H1840	FAC1471	BXD61	CD	1.43169	524	2014-07-09	2014-10-22	2014-11-10	2015-12-15		F	105			23.4	25	1.6	38.28			1.40459	0.0154372	1.4122	0.113436	1.4521	0.15774	1.57125	0.228632	1.5837	0.193543	1.31804	0.0686977	2.6639	4.22939	7.18847	2.73018	2.45013	2.50424	12	1.50959	1.72055	2.071	2.11507	2.37329	2.61918	DD
243	UT247	203203210143_R05C01	H1488	FAC1269	BXD40	HFD	0.795082	291	2014-01-26	2014-04-11	2014-05-14	2014-11-13	2014-04-11	F	75	75	0	19.5	24.2	4.7	35.89	10	2.7	0.717213	-0.0842843	0.79784	-0.00389556	0.901759	0.144171	0.970572	0.162977	0.537943	-0.225421	0.938766	0.234889	2.67112	4.2352	7.19285	2.74976	2.42955	2.51007	10	0.69589	1.13493	1.30904	1.2411	1.48356	2.05479	BB
244	UT248	203203210143_R06C01	H1716	FAC1404	BXD63	HFD	0.508197	186	2014-05-12	2014-07-25	2014-09-08	2014-11-14	2014-07-25	F	74	74	0	19.1	29.1	10	42.04	14.8	3.8	0.407031	-0.129644	0.443982	-0.133769	0.498557	-0.0171359	0.498159	-0.0683282	0.374832	-0.106071	0.384385	-0.0736839	2.64496	4.20533	7.16235	2.66373	2.35776	2.49361	11	1.5726	1.8274	2.03935	2.10411	2.25753	2.43562	BB
245	UT253	203203210143_R01C02	H0186	FAC171	BXD70	HFD	0.653005	239	2011-09-14	2011-11-14	2012-03-26	2012-05-10	2012-02-13	F	61	152	-91	30.2	51.5	21.3	54.72	13.2	4.4	0.646387	-0.02396	0.779335	0.0885255	0.728751	0.0909597	0.773273	0.0850839	0.603315	-0.0201629	0.878068	0.295924	2.67617	4.24296	7.20045	2.70319	2.44425	2.5289	16	1.44932	1.72808	1.83801	1.84521	2.01096	2.12877	BB
246	UT263	203203210143_R02C02	H0474	FAC435	BXD63	HFD	0.590164	216	2011-10-06	2011-12-14	2012-03-26	2012-05-09	2012-02-13	F	69	130	-61	21.1	26.4	5.3	33.4	5.7	0.8	0.44511	-0.167228	0.577037	-0.0647094	0.475496	-0.109309	0.630042	-0.00533364	0.477281	-0.084325	0.52499	-0.00331013	2.65783	4.22232	7.17795	2.66408	2.39933	2.50839	11	1.5726	1.8274	2.03935	2.10411	2.25753	2.43562	BB
247	UT269	203203210143_R03C02	H1800	FAC1316	BXD29	CD	1.30601	478	2014-01-06	2014-04-11	2014-05-14	2015-04-29		F	95			19.6	22.1	2.5	23.15	8.9	1.3	1.04356	-0.229568	1.19242	-0.00822449	1.22946	0.0410733	1.27918	0.0421887	1.40933	0.142913	1.08011	-0.061538	2.63044	4.19274	7.14813	2.71835	2.3719	2.46468	18	1.59178	2.02397	2.24444	2.16712	2.48219	3.42466	DD
248	UT276	203203210143_R04C02	H1434	FAC1215	BXD62	HFD	1.33333	488	2013-12-27	2014-04-11	2014-05-14	2015-04-29	2014-04-11	F	105	105	0	22	30.5	8.5	38.88	8.4	2	1.46198	0.163623	1.2458	0.0238214	1.60833	0.396903	1.31731	0.0573555	1.51599	0.22267	1.41288	0.24782	2.66198	4.22858	7.18313	2.75112	2.47852	2.49791	10	1.12329	1.38767	1.57808	1.5863	1.76781	2.12055	DD
249	UT293	203203210143_R05C02	H1426	FAC1207	BXD101	CD	1.40164	513	2013-11-30	2014-04-11	2014-05-14	2015-04-27		F	132			21	22.7	1.7	25.56	11	2.1	1.47407	0.112662	1.72384	0.448531	2.11896	0.849938	1.839	0.521632	2.48513	1.12456	1.57517	0.351584	2.72236	4.29432	7.25108	2.8463	2.52349	2.54685	14	1.26849	1.53562	1.9546	1.94521	2.36438	2.66027	DD
250	UT296	203531420086_R01C01	H1422	FAC1203	BXD101	HFD	1.34699	493	2013-12-20	2014-04-11	2014-05-13	2015-04-27	2014-04-11	F	112	112	0	21.1	31	9.9	56.98	14	2.9	1.70327	0.392302	1.48971	0.257066	1.73749	0.514541	1.18272	-0.0887156	2.20874	0.901976	1.48149	0.30472	2.73268	4.30576	7.2646	2.83365	2.59809	2.56095	14	0.717808	1.00616	1.31624	1.26301	1.68425	2.0274	DD
251	UT301	203531420086_R02C01	H0777	FAC719	BXD27	CD	0.617486	226	2012-01-22	2012-07-23	2012-08-15	2012-09-04		F	183			23.7	24	0.3	24.92	11.9	1.9	0.621453	-0.0161063	0.640617	-0.0224612	0.669805	0.0619623	0.653216	-0.00512183	0.615152	0.0266455	0.536135	-0.0155755	2.67474	4.23697	7.19515	2.6959	2.40757	2.52601	8	1.51233	1.75548	2.07603	2.03425	2.29795	2.96712	DD
252	UT314	203531420086_R03C01	H1848	FAC1479	BXD62	CD	0.691257	253	2014-08-10	2014-10-22	2014-11-10	2015-04-20		F	73			18.4	21.1	2.7	24.3	8.4	2.2	0.67891	-0.0267466	0.685777	-0.0348978	0.681574	0.0115297	0.697102	-0.0232353	0.503052	-0.158088	0.486625	-0.128294	2.68122	4.24613	7.20151	2.72164	2.45609	2.52011	10	1.44932	1.73493	1.99808	1.99589	2.19795	2.53973	DD
253	UT321	203531420086_R04C01	H2035	FAC1576	BXD32	CD	0.546448	200	2014-10-02	2015-02-06	2015-03-11	2015-04-20		F	127			21.2	21.9	0.7	21.1	10.5	1.8	0.467576	-0.104409	0.573048	-0.0345679	0.512634	-0.0353109	0.482336	-0.116299	0.377519	-0.141045	0.38576	-0.105084	2.66454	4.22576	7.1818	2.68379	2.40687	2.51462	12	1.77534	1.86164	2.1468	2.22055	2.36164	2.63836	DD
254	UT329	203531420086_R05C01	H2125	FAC1663	BXD66	HFD	0.502732	184	2014-10-22	2015-02-06	2015-03-11	2015-04-24	2015-02-06	F	107	107	0	20	31.2	11.2	36.85	7	2.9	0.391863	-0.139768	0.497402	-0.0760826	0.403839	-0.107247	0.40662	-0.155275	0.300341	-0.175181	0.372961	-0.0804264	2.64992	4.20981	7.16534	2.69578	2.35959	2.50002	7	1.19178	1.38082	1.79022	1.79178	2.28219	2.57534	DD
255	UT330	203531420086_R06C01	H1847	FAC1478	BXD62	CD	0.691257	253	2014-08-10	2014-10-22	2014-11-10	2015-04-20		F	73			19.6	21.4	1.8	25	13.6	2	0.691972	-0.0136851	0.733776	0.0131017	0.7563	0.0862556	0.729194	0.0088567	0.475289	-0.18585	0.583798	-0.0311207	2.67794	4.24185	7.1996	2.71183	2.46963	2.52129	10	1.44932	1.73493	1.99808	1.99589	2.19795	2.53973	DD
256	UT336	203531420086_R02C02	H2015	FAC1556	C57BL/6J	HFD	0.581967	213	2014-09-19	2015-02-06	2015-03-11	2015-04-20	2015-02-06	M	140	140	0	30.6	30.4	-0.2	31.9	16.7	4	0.589554	-0.0152179	0.640183	0.00483567	0.617805	0.0399104	0.652681	0.0241943	0.646527	0.0929916	0.614082	0.0928054	2.6517	4.21539	7.17072	2.63458	2.42611	2.49796	<5							BB
257	UT337	203531420086_R03C02	H2014	FAC1555	C57BL/6J	HFD	0.581967	213	2014-09-19	2015-02-06	2015-03-11	2015-04-20	2015-02-06	M	140	140	0	30	38.7	8.7	44.3	13.7	4.9	0.662481	0.0577088	0.603988	-0.0313592	0.627492	0.0495981	0.606313	-0.0221739	0.652914	0.0993791	0.568907	0.0476302	2.65143	4.21066	7.16729	2.63876	2.40305	2.49589	<5							BB
258	UT338	203531420086_R04C02	H1266	FAC1105	C57BL/6J	HFD	2.12295	777	2013-03-11	2013-08-09	2013-10-02	2015-04-27	2013-08-08	M	151	150	1	33.3	46.4	13.1	60.71	11	5.3	2.84178	0.81454	2.1505	0.312031	2.65463	0.777414	2.33209	0.40851	2.74808	0.677323	2.49574	0.654121	2.75758	4.32768	7.28505	2.77214	2.67076	2.60227	<5							BB
259	UT340	203531420086_R05C02	H1350	FAC948	C57BL/6J	CD	2.05738	753	2013-03-28	2013-08-09	2013-10-02	2015-04-20		M	134			28.7	28	-0.7	30.3	12.2	2.4	1.9751	0.0083823	1.96564	0.178365	1.80005	-0.0218773	2.02809	0.159628	2.06962	0.0634242	1.93663	0.151195	2.66661	4.22597	7.18361	2.68493	2.48602	2.50236	<5							BB
260	UT342	203531420086_R06C02	H2124	FAC1662	BXD66	HFD	0.502732	184	2014-10-22	2015-02-06	2015-03-11	2015-04-24	2015-02-06	F	107	107	0	18.6	29.4	10.8	36.52	7	3.7	0.47498	-0.0566507	0.521995	-0.0514892	0.486218	-0.024867	0.479434	-0.082461	0.356326	-0.119196	0.411933	-0.0414541	2.64627	4.2043	7.16066	2.68887	2.34813	2.49699	7	1.19178	1.38082	1.79022	1.79178	2.28219	2.57534	DD
261	UT346	203531420087_R01C01	H1855	FAC1486	BXD70	CD	0.713115	261	2014-08-13	2014-10-22	2014-11-10	2015-05-01		F	70			18.5	21.2	2.7	25.97	6.6	1.4	0.439203	-0.28663	0.671629	-0.0661112	0.499477	-0.188998	0.58706	-0.151647	0.439917	-0.242743	0.667051	0.0334047	2.67651	4.23989	7.19633	2.69932	2.40655	2.52741	20	1.19452	1.69863	2.01904	2.06575	2.43904	2.5726	BB
262	UT354	203531420087_R02C01	H1598	FAC1363	BXD65b	HFD	1.13388	415	2014-03-12	2014-06-12	2014-07-23	2015-05-01	2014-06-12	F	92	92	0	24	39.5	15.5		8.8	2.1	1.39718	0.282945	1.21974	0.153492	1.36149	0.31824	1.18191	0.0895825	1.4886	0.391661	1.31751	0.323347	2.65468	4.21548	7.17346	2.75009	2.47509	2.48767	11	1.23288	1.49315	1.6411	1.60274	1.79452	2.11507	DD
263	UT356	203531420087_R03C01	H1487	FAC1268	BXD70	CD	1.18579	434	2014-02-21	2014-04-11	2014-05-13	2015-05-01		F	49			14.9	20.6	5.7	34.51	11.6	1.7	0.756284	-0.405875	1.02352	-0.0832659	0.801566	-0.285458	0.996307	-0.139653	1.09422	-0.0538273	1.12165	0.0830026	2.67171	4.23703	7.19629	2.70719	2.43265	2.51986	20	1.19452	1.69863	2.01904	2.06575	2.43904	2.5726	BB
264	UT358	203531420087_R04C01	H1936	FAC1487	BXD70	CD	0.713115	261	2014-08-13	2014-10-22	2014-11-10	2015-05-01		F	70			16.6	17.7	1.1	24.67	8.2	1.1	0.463978	-0.261856	0.637379	-0.100361	0.457918	-0.230556	0.553924	-0.184783	0.613022	-0.0696382	0.669272	0.0356253	2.66125	4.21963	7.17475	2.67502	2.38599	2.51738	20	1.19452	1.69863	2.01904	2.06575	2.43904	2.5726	BB
265	UT360	203531420087_R05C01	H1597	FAC1362	BXD65b	HFD	1.13388	415	2014-03-12	2014-06-12	2014-07-23	2015-05-01	2014-06-12	F	92	92	0	24.1	35.1	11	59.86	12.4	0.3	1.48703	0.372792	1.26697	0.200715	1.48501	0.441757	1.17288	0.0805471	1.4108	0.313857	1.34757	0.353401	2.64521	4.20479	7.15981	2.73596	2.45482	2.48063	11	1.23288	1.49315	1.6411	1.60274	1.79452	2.11507	DD
266	UT361	203531420087_R06C01	H1491	FAC1272	BXD70	CD	1.18579	434	2014-02-21	2014-04-11	2014-05-13	2015-05-01		F	49			15.8	17.5	1.7	20.89	4.7	1.4	0.825866	-0.336294	0.995232	-0.11155	0.829457	-0.257568	0.950369	-0.185591	0.930074	-0.217976	1.08219	0.043545	2.67498	4.24117	7.19797	2.70069	2.43025	2.5283	20	1.19452	1.69863	2.01904	2.06575	2.43904	2.5726	BB
267	UT362	203531420087_R01C02	H1885	FAC1515	DBA/2J	CD	0.939891	344	2014-05-15	2014-10-22	2014-11-10	2015-04-24		F	160			24.7	28.3	3.6	26.02	8.8	1.5	0.723263	-0.211906	0.8449	-0.0698947	0.726757	-0.15293	0.937839	0.00854262	0.873175	-0.0327652	0.723619	-0.104333	2.67302	4.23569	7.19237	2.72056	2.44035	2.52045	28	0.884932	1.52808	1.78552	1.82055	2.18493	2.48767	DD
268	UT364	203531420087_R02C02	H1886	FAC1516	DBA/2J	CD	0.939891	344	2014-05-15	2014-10-22	2014-11-10	2015-04-24		F	160			25.2	27.1	1.9	26.01	7.9	1.7	0.812789	-0.12238	0.832365	-0.0824302	0.816677	-0.0630098	0.892377	-0.036919	0.791867	-0.114073	0.661931	-0.166021	2.66674	4.22962	7.18641	2.7147	2.42712	2.51069	28	0.884932	1.52808	1.78552	1.82055	2.18493	2.48767	DD
269	UT365	203531420087_R03C02	H2085	FAC1625	BXD100	HFD	0.480874	176	2014-10-30	2015-02-06	2015-03-11	2015-04-24	2015-02-06	F	99	99	0	24.1	28.3	4.2	33.57	5.9	3.2	0.503793	-0.00766133	0.581646	0.0252268	0.431613	-0.0610422	0.464292	-0.079233	0.382564	-0.0714369	0.54014	0.105481	2.6605	4.22438	7.18188	2.67419	2.40171	2.50801	15	1.09589	1.56986	1.73753	1.73699	1.92603	2.44384	BB
270	UT369	203531420087_R04C02	H1486	FAC1267	BXD70	CD	1.18579	434	2014-02-21	2014-04-11	2014-05-13	2015-05-01		F	49			12.2	17	4.8	25.38	14.3	2.2	0.772482	-0.389678	1.05681	-0.0499715	1.00562	-0.0814035	0.990116	-0.145843	1.14535	-0.00270367	1.36897	0.330322	2.66138	4.22299	7.18034	2.69588	2.41665	2.51002	20	1.19452	1.69863	2.01904	2.06575	2.43904	2.5726	BB
271	UT374	203531420087_R05C02	H2086	FAC1626	BXD100	CD	0.480874	176	2014-10-30	2015-02-06	2015-03-11	2015-04-24		F	99			22	24.1	2.1	22.81	9.4	2	0.480396	-0.0310582	0.564071	0.00765179	0.415676	-0.0769791	0.44144	-0.102086	0.432206	-0.0217946	0.575498	0.140839	2.64744	4.20859	7.16417	2.66011	2.37137	2.49317	22	1.18356	1.57808	2.03425	2.22055	2.33425	2.93699	BB
272	UT375	203531420087_R06C02	H1564	FAC1347	BXD95	CD	1.75956	644	2013-07-26	2014-04-11	2014-05-13	2015-05-01		F	259			25.1	25.5	0.4	24.92	7	1.8	1.32541	-0.366399	1.41498	-0.139768	1.49696	-0.0738574	1.45464	-0.163533	1.47339	-0.239583	1.48121	-0.0490473	2.68868	4.25403	7.21075	2.77902	2.46089	2.53409	9	1.11507	1.50822	1.68128	1.67123	1.89726	2.11781	DD
273	UT381	203531420022_R02C01	H1799	FAC1298	BXD100	CD	1.26503	463	2014-01-19	2014-04-11	2014-05-14	2015-04-27		F	82			17.1	18.8	1.7	23.46	9.4	2	0.880182	-0.355119	1.04596	-0.122685	0.959635	-0.194198	0.867589	-0.334962	1.11194	-0.11412	1.08479	-0.0217422	2.65507	4.21626	7.17474	2.69041	2.41795	2.49644	22	1.18356	1.57808	2.03425	2.22055	2.33425	2.93699	BB
274	UT390	203531420022_R04C01	H0169	FAC154	BXD60	CD	2.03279	744	2011-10-02	2011-11-14	2012-03-26	2013-10-15		F	43			25.3	32	6.7	30.43	7.2	1.5	2.24877	0.304751	1.80305	0.0349788	1.92187	0.12068	1.82213	-0.025674	2.39954	0.417553	1.99639	0.232023	2.68481	4.24741	7.20622	2.77853	2.50149	2.51643	19	1.07397	1.59726	1.91911	1.94521	2.36164	2.5863	DD
275	UT397	203531420022_R06C01	H0756	FAC698	BXD90	CD	1.5	549	2011-12-19	2012-07-23	2012-08-15	2013-06-20		F	217			26.2	27.3	1.1	25.52	14.1	1.6	1.25148	-0.200725	1.41778	0.0656842	1.31	-0.0419553	1.27677	-0.123263	1.26034	-0.197075	1.23731	-0.0705541	2.67481	4.23636	7.1937	2.73342	2.47338	2.52348	17	1.29041	1.8	2.02224	1.96438	2.26849	2.7863	BB
276	UT401	203531420022_R01C02	H0554	FAC504	BXD89	CD	0.527322	193	2012-02-26	2012-07-23	2012-08-15	2012-09-06		F	148			23.3	23.1	-0.2	22.7	9.2	0.6	0.429185	-0.125145	0.569174	-0.0235093	0.546916	0.0150976	0.568647	-0.0139145	0.299606	-0.200127	0.431599	-0.0428574	2.67887	4.23964	7.19624	2.68927	2.41597	2.53302	10	1.74247	1.93425	2.10466	2.10137	2.2	2.67945	BB
277	UT402	203531420022_R02C02	H0615	FAC565	BXD86	CD	1.48634	544	2011-08-18	2012-07-23	2012-08-15	2013-02-12		F	340			39.7	39	-0.7	36.91	14.3	2.2	1.31036	-0.129236	1.49702	0.155586	1.38889	0.048448	1.35412	-0.0344296	1.73199	0.288029	0.959525	-0.336634	2.65022	4.208	7.16156	2.73158	2.4431	2.47865	10	2.21096	2.33151	2.49452	2.46301	2.63562	2.83014	DD
278	UT403	203531420022_R03C02	H0466	FAC427	BXD101	HFD	0.991803	363	2011-09-09	2011-12-14	2012-03-26	2012-09-06	2012-02-10	F	96	154	-58	23.6	27.6	4	36.7	17.2	3.1	1.0208	0.037711	1.13738	0.182056	0.971945	0.0484876	0.956277	-0.0166483	0.988069	0.0310168	1.02573	0.153303	2.68462	4.25043	7.20575	2.7594	2.4466	2.5138	14	0.717808	1.00616	1.31624	1.26301	1.68425	2.0274	DD
279	UT405	203531420022_R04C02	H0848	FAC785	BXD53	CD	1.56011	571	2011-11-27	2012-07-23	2012-08-15	2013-06-20		F	239			23	25.2	2.2	35.47	16.3	2.6	1.43327	-0.0744177	1.62656	0.227529	1.64956	0.246918	1.63047	0.179921	1.47746	-0.0391399	1.62205	0.262688	2.67471	4.23704	7.19351	2.7167	2.49766	2.51433	10	1.33699	1.77329	2.08137	2.29589	2.36986	2.41096	BB
280	UT410	203531420022_R05C02	H1376	FAC1104	C57BL/6J	HFD	1.46995	538	2013-03-16	2013-08-09	2013-10-02	2014-09-05	2013-08-08	M	146	145	1	29.9	40.2	10.3	59.2	13.6	7.5	1.87268	0.448216	1.61116	0.282526	1.78395	0.457333	1.6951	0.32033	1.87526	0.447435	1.65526	0.373146	2.69206	4.25656	7.21394	2.71538	2.55772	2.53128	<5							BB
281	UT411	203531420022_R06C02	H0514	FAC470	C57BL/6J	HFD	1.48634	544	2011-12-24	2012-07-23	2012-08-15	2013-06-20	2012-07-20	F	212	209	3	27.2	32.7	5.5	76.17	12.9	4.8	1.74311	0.303514	1.62364	0.28221	1.4956	0.155159	1.68336	0.29481	1.63765	0.193686	1.76461	0.468452	2.71205	4.28063	7.2386	2.73219	2.55478	2.56445	26	1.36438	1.78219	1.93846	1.97123	2.09384	2.75068	BB
282	UT413	203531420046_R01C01	H0087	FAC076	BXD32	CD	2.02732	742	2011-01-31	2011-10-27	2012-03-26	2013-02-11		F	269			36.5	32	-4.5	24.95	12.9	2.5	1.42564	-0.51333	1.18756	-0.576248	1.33791	-0.458676	1.33357	-0.509641	1.09937	-0.877231	1.10097	-0.65871	2.66317	4.22422	7.17871	2.77075	2.46143	2.49077	12	1.77534	1.86164	2.1468	2.22055	2.36164	2.63836	DD
283	UT415	203531420046_R02C01	H0555	FAC505	BXD89	CD	0.527322	193	2012-02-26	2012-07-23	2012-08-15	2012-09-06		F	148			23.2	21.4	-1.8	25.6	8.7	2	0.407754	-0.146576	0.704197	0.111514	0.467417	-0.0644024	0.617657	0.0350955	0.27587	-0.223863	0.518315	0.0438592	2.67204	4.23617	7.1935	2.72792	2.51223	2.52069	10	1.74247	1.93425	2.10466	2.10137	2.2	2.67945	BB
284	UT416	203531420046_R03C01	H0856	FAC793	BXD95	HFD	0.994536	364	2012-02-14	2012-07-23	2012-08-15	2013-02-12	2012-07-20	F	160	157	3	26.3	37.4	11.1	53.61	9.8	2.4	1.10703	0.121422	1.1147	0.157241	0.949691	0.0239293	1.03717	0.0619503	0.985836	0.0260935	0.944557	0.0697837	2.66162	4.2212	7.1771	2.71985	2.42059	2.5078	6	0.830137	0.969863	1.19954	1.19315	1.46438	1.51781	DD
285	UT422	203531420046_R04C01	H0548	FAC498	BXD87	HFD	0.980874	359	2012-02-19	2012-07-23	2012-08-15	2013-02-12	2012-07-20	F	155	152	3	19.7	21.1	1.4	27.03	12.5	2.6	0.792725	-0.180276	0.829382	-0.117411	0.611503	-0.30274	0.79206	-0.17168	0.815812	-0.13048	0.668673	-0.194395	2.62774	4.18509	7.13941	2.68343	2.34028	2.47248	7	1.06575	1.16438	1.59726	1.70411	1.91233	2.35616	DD
286	UT426	203531420046_R05C01	H0819	FAC756	BXD63	CD	0.595628	218	2012-01-30	2012-07-23	2012-08-15	2012-09-04		F	175			18.8	26.4	7.6	28.1	12.8	1.3	0.458472	-0.158911	0.499379	-0.146634	0.439936	-0.149477	0.522034	-0.117934	0.555563	-0.0114228	0.47444	-0.0585425	2.66028	4.22043	7.17734	2.67851	2.384	2.50916	7	1.61644	1.74521	2.06536	2.04932	2.31781	2.5863	BB
287	UT428	203531420046_R06C01	H1722	FAC1411	BXD61	HFD	0.513661	188	2014-05-10	2014-07-25	2014-09-09	2014-11-14	2014-07-25	F	76	76	0	22.1	33	10.9	38.92	14.1	2.9	0.544272	0.0025529	0.584321	0.00230403	0.499327	-0.0209735	0.578287	0.00720651	0.464685	-0.0215973	0.510167	0.0474155	2.66615	4.22478	7.18437	2.67628	2.3969	2.52304	8	1.5726	1.81507	2.01986	2.00274	2.24384	2.57534	DD
288	UT430	203531420046_R01C02	H0547	FAC497	BXD87	HFD	0.980874	359	2012-02-19	2012-07-23	2012-08-15	2013-02-12	2012-07-20	F	155	152	3	23.7	28.4	4.7	38.47	8.1	1.1	0.969916	-0.00308544	0.944155	-0.00263771	0.587263	-0.32698	0.850682	-0.113059	0.758221	-0.188071	0.71863	-0.144438	2.64439	4.20171	7.1582	2.70733	2.37264	2.48968	7	1.06575	1.16438	1.59726	1.70411	1.91233	2.35616	DD
289	UT435	203531420046_R02C02	H1841	FAC1472	BXD61	CD	1.43169	524	2014-07-09	2014-10-22	2014-11-10	2015-12-15		F	105			24.2	26.3	2.1	36.58			1.41338	0.0242324	1.44823	0.149461	1.29006	-0.00429828	1.50341	0.160786	1.5714	0.181239	1.32145	0.0721104	2.66766	4.22782	7.18598	2.72742	2.44834	2.51257	12	1.50959	1.72055	2.071	2.11507	2.37329	2.61918	DD
290	UT438	203531420046_R03C02	H1827	FAC1458	BXD45	CD	1.38525	507	2014-07-26	2014-10-22	2014-11-10	2015-12-15		F	88			18.9	20.2	1.3	25.24			1.32032	-0.025955	1.19931	-0.0631987	1.1963	-0.0589024	1.15822	-0.14537	1.42842	0.0839936	0.765172	-0.444368	2.66656	4.22674	7.18535	2.72961	2.41873	2.50377	6	1.74521	1.86438	2.07123	2.07534	2.30753	2.32603	DD
291	UT439	203531420046_R04C02	H0465	FAC426	BXD101	HFD	0.991803	363	2011-09-09	2011-12-14	2012-03-26	2012-09-06	2012-02-10	F	96	154	-58	23.5	35.6	12.1	52.6	11.9	2.1	1.02847	0.0453781	1.21329	0.257968	0.934586	0.0111285	0.974514	0.00158921	0.955753	-0.00129985	1.01602	0.143589	2.66624	4.22575	7.18338	2.74215	2.44796	2.50676	14	0.717808	1.00616	1.31624	1.26301	1.68425	2.0274	DD
292	UT440	203531420046_R05C02	H1812	FAC1443	DBA/2J	CD	1.45355	532	2014-07-01	2014-10-22	2014-11-10	2015-12-15		F	113			21.5	22.2	0.7	23.02			1.07578	-0.333551	1.13237	-0.183461	1.06369	-0.249099	1.19483	-0.166166	1.23305	-0.17863	0.940799	-0.327267	2.66732	4.22649	7.18362	2.75167	2.43276	2.50512	28	0.884932	1.52808	1.78552	1.82055	2.18493	2.48767	DD
293	UT446	203531420046_R06C02	H2092	FAC1632	BXD63	CD	2.05464	752	2014-10-05	2015-02-06	2015-03-11	2016-10-26		F	124			21.9	23	1.1	22.4			1.56765	-0.396538	1.45579	-0.329347	1.71074	-0.10888	1.70307	-0.163104	1.88423	-0.119273	1.61367	-0.169424	2.68873	4.25107	7.20723	2.74384	2.48904	2.52544	7	1.61644	1.74521	2.06536	2.04932	2.31781	2.5863	BB
294	UT447	203531420085_R01C01	H1181	FAC1023	BXD51	HFD	0.576503	211	2013-03-18	2013-08-09	2013-10-02	2013-10-15	2013-08-08	F	144	143	1	26.9	35.1	8.2	37.65	10.3	1.4	0.710499	0.110771	0.588334	-0.0427467	0.656447	0.08316	0.635458	0.011564	0.70541	0.157255	0.424917	-0.0916782	2.66577	4.23002	7.18668	2.71167	2.36532	2.51509	7	1.57534	1.75616	1.86614	1.89315	2.0137	2.10411	DD
295	UT449	203531420085_R02C01	H0737	FAC682	BXD90	HFD	1.55738	570	2011-11-28	2012-07-23	2012-08-15	2013-06-20	2012-07-20	F	238	235	3	30.3	39.2	8.9	54.46	14.3	2.2	1.38718	-0.11799	1.3847	-0.0121911	1.43686	0.0365282	1.35663	-0.0916184	1.5151	0.0011982	1.43289	0.0758644	2.68953	4.25712	7.21487	2.75958	2.48751	2.53403	13	0.917808	1.11507	1.55448	1.58356	2.07945	2.28493	BB
296	UT452	203531420085_R03C01	H1182	FAC1024	BXD51	HFD	0.576503	211	2013-03-18	2013-08-09	2013-10-02	2013-10-15	2013-08-08	F	144	143	1	21.8	31.6	9.8	31.97	9.7	0.3	0.649889	0.0501614	0.551894	-0.0791867	0.546686	-0.0266005	0.637964	0.0140704	0.549919	0.00176362	0.377475	-0.139119	2.65557	4.21708	7.17448	2.6894	2.35281	2.50678	7	1.57534	1.75616	1.86614	1.89315	2.0137	2.10411	DD
297	UT454	203531420085_R05C01	H0298	FAC276	BXD87	CD	1.58743	581	2011-11-16	2011-12-13	2012-03-26	2013-06-19		F	27			19.4	20.9	1.5	22.75	8	1.7	1.30169	-0.231218	1.55793	0.137571	1.13386	-0.291822	1.46586	-0.00764692	1.3976	-0.145896	1.15295	-0.229826	2.65718	4.22359	7.18127	2.73047	2.43644	2.4983	5	1.88767	2.01096	2.22301	2.16438	2.46438	2.74521	DD
298	UT455	203531420085_R06C01	H0742	FAC687	BXD29	CD	1.56284	572	2011-11-25	2012-07-23	2012-08-15	2013-06-19		F	241			22.3	22.7	0.4	22.37	7.5	0.8	1.55352	0.0433127	1.55612	0.154953	1.57672	0.171774	1.65186	0.199018	1.73372	0.214429	1.32727	-0.0344402	2.65491	4.21925	7.17764	2.75688	2.42645	2.48614	18	1.59178	2.02397	2.24444	2.16712	2.48219	3.42466	DD
299	UT456	203531420085_R01C02	H0669	FAC618	BXD29	HFD	1.5765	577	2011-11-20	2012-07-23	2012-08-15	2013-06-19	2012-07-20	F	246	243	3	24.3	29.4	5.1	49.83	14.6	1.3	1.67748	0.154662	1.5682	0.156369	1.52678	0.110317	1.71064	0.246317	1.91291	0.380174	1.56619	0.192773	2.64333	4.20563	7.16136	2.74091	2.40251	2.48251	15	1.5863	1.84658	2.0453	2.05479	2.26301	2.37534	DD
300	UT457	203531420085_R02C02	H1093	FAC935	BXD90	HFD	0.595628	218	2013-03-12	2013-08-09	2013-10-02	2013-10-16	2013-08-08	F	150	149	1	26.5	42.2	15.7	42.16	15.5	3.4	0.538179	-0.0792038	0.642231	-0.00378164	0.581193	-0.00821994	0.541759	-0.0982089	0.52127	-0.0457157	0.486457	-0.0465256	2.67091	4.23628	7.19337	2.6937	2.41363	2.5207	13	0.917808	1.11507	1.55448	1.58356	2.07945	2.28493	BB
301	UT458	203531420085_R03C02	H0851	FAC788	BXD53	CD	1.96175	718	2012-01-19	2012-07-23	2012-08-15	2014-01-06		F	186			28.3	31.8	3.5	26.07	9.7	2	1.51815	-0.360291	1.56057	-0.152038	1.61187	-0.129419	1.4605	-0.327593	1.19042	-0.721626	1.90835	0.20485	2.75087	4.32428	7.28353	2.82798	2.64286	2.59303	10	1.33699	1.77329	2.08137	2.29589	2.36986	2.41096	BB
302	UT461	203531420085_R04C02	H0847	FAC784	BXD53	CD	1.56011	571	2011-11-27	2012-07-23	2012-08-15	2013-06-20		F	239			19.9	20.8	0.9	25.95	5.1	1.1	1.45814	-0.049548	1.50062	0.101591	1.62888	0.226238	1.54835	0.0978021	1.46272	-0.0538746	1.32934	-0.0300272	2.66193	4.22463	7.18442	2.72995	2.4964	2.50119	10	1.33699	1.77329	2.08137	2.29589	2.36986	2.41096	BB
303	UT462	203531420085_R05C02	H0179	FAC164	BXD89	HFD	0.961749	352	2011-09-19	2011-11-14	2012-03-26	2012-09-05	2012-02-13	F	56	147	-91	23.4	30.6	7.2	38.6	11.6	2.3	0.881909	-0.0734369	0.863498	-0.0683625	0.832929	-0.0651879	0.982237	0.0345705	0.706555	-0.220907	0.8153	-0.03138	2.6588	4.22265	7.17925	2.70851	2.39408	2.50543	9	1.33425	1.91918	2.03744	2.06575	2.31781	2.32877	BB
304	UT463	203531420085_R06C02	H0221	FAC203	BXD66	HFD	0.980874	359	2011-09-12	2011-11-15	2012-03-26	2012-09-05	2012-02-13	F	64	154	-90	20.6	31.6	11	48.4	15.6	4.1	0.808061	-0.16494	1.05849	0.111692	0.925675	0.0114318	0.96795	0.00420968	1.3828	0.436508	1.00057	0.137505	2.66171	4.22901	7.1846	2.73653	2.43192	2.50548	7	1.19178	1.38082	1.79022	1.79178	2.28219	2.57534	DD
305	UT469	203531420036_R01C01	H0857	FAC794	BXD95	HFD	0.994536	364	2012-02-14	2012-07-23	2012-08-15	2013-02-12	2012-07-20	F	160	157	3	21.9	26.6	4.7	41.86	11.6	1.9	1.03213	0.0465198	1.14564	0.18818	1.12055	0.19479	1.09825	0.123029	1.02746	0.0677166	0.914114	0.0393408	2.67861	4.24405	7.20087	2.72235	2.41383	2.52412	6	0.830137	0.969863	1.19954	1.19315	1.46438	1.51781	DD
306	UT476	203531420036_R02C01	H0703	FAC649	BXD51	CD	0.95082	348	2012-02-29	2012-07-23	2012-08-15	2013-02-11		F	145			23.5	26.2	2.7	29.03	12.1	1.4	1.0036	0.0583406	1.0113	0.0879743	1.13588	0.246978	1.11541	0.176926	0.97406	0.057359	0.749724	-0.0875927	2.66117	4.22654	7.18315	2.72702	2.42313	2.50279	9	1.92055	2.21644	2.35008	2.36986	2.52055	2.69315	DD
307	UT478	203531420036_R03C01	H0854	FAC791	BXD53	CD	1.96175	718	2012-01-19	2012-07-23	2012-08-15	2014-01-06		F	186			23.8	25.2	1.4	32.54	11.7	1.9	2.01665	0.138207	1.94566	0.233048	2.2007	0.459405	2.05576	0.267663	2.20791	0.295862	1.97678	0.273278	2.7072	4.27597	7.23153	2.81014	2.53481	2.52929	10	1.33699	1.77329	2.08137	2.29589	2.36986	2.41096	BB
308	UT479	203531420036_R04C01	H0818	FAC755	BXD63	CD	0.595628	218	2012-01-30	2012-07-23	2012-08-15	2012-09-04		F	175			25.2	26.8	1.6	28.3	17.7	1.9	0.446937	-0.170446	0.523656	-0.122357	0.415709	-0.173703	0.529702	-0.110265	0.394881	-0.172105	0.416702	-0.11628	2.6548	4.21833	7.17451	2.67863	2.36777	2.499	7	1.61644	1.74521	2.06536	2.04932	2.31781	2.5863	BB
309	UT483	203531420036_R05C01	H1522	FAC1309	BXD98	HFD	1.80874	662	2014-01-11	2014-04-11	2014-05-14	2015-11-04	2014-04-11	F	90	90	0	15.2	23	7.8	27.19			1.58575	-0.151456	1.49027	-0.102876	1.21708	-0.395205	1.52732	-0.13219	1.43266	-0.328741	1.70646	0.134058	2.68145	4.24626	7.20532	2.80453	2.49717	2.51266	10	0.986301	1.2	1.55096	1.57945	1.88767	2.05753	BB
310	UT484	203531420036_R06C01	H1098	FAC940	BXD90	HFD	0.937158	343	2013-01-28	2013-08-09	2013-10-02	2014-01-06	2013-08-08	F	193	192	1	29.4	49.2	19.8	65.56	13.4	2.9	0.834603	-0.0980446	0.930923	0.0182616	0.818036	-0.0593468	0.81697	-0.11003	0.739182	-0.164069	0.77711	-0.0485015	2.66666	4.22829	7.18521	2.71	2.41645	2.51582	13	0.917808	1.11507	1.55448	1.58356	2.07945	2.28493	BB
311	UT489	203531420036_R01C02	H0532	FAC488	DBA/2J	HFD	0.986339	361	2012-02-17	2012-07-23	2012-08-15	2013-02-12	2012-07-20	F	157	154	3	20.8	24.6	3.8	33.79	11.4	1.6	0.614108	-0.363937	0.699952	-0.251107	0.616096	-0.302754	0.730709	-0.237624	0.661979	-0.289694	0.694587	-0.173163	2.66923	4.22843	7.18608	2.71385	2.40167	2.52483	19	1.36986	1.60274	1.80058	1.85205	2.01918	2.23562	DD
312	UT492	203531420036_R02C02	H0704	FAC650	BXD51	CD	0.95082	348	2012-02-29	2012-07-23	2012-08-15	2013-02-11		F	145			23.1	24.3	1.2	28.57	14.2	1.4	0.91066	-0.0345981	1.01741	0.0940853	0.981372	0.0924705	1.039	0.100516	0.743926	-0.172774	0.686603	-0.150713	2.66737	4.2304	7.18806	2.71805	2.41772	2.51017	9	1.92055	2.21644	2.35008	2.36986	2.52055	2.69315	DD
313	UT498	203531420036_R03C02	H0734	FAC679	BXD29	HFD	2.01093	736	2012-01-01	2012-07-23	2012-08-15	2014-01-06	2012-07-20	F	204	201	3	22.8	29.1	6.3	43.7	11.2	1.2	1.96413	0.0402958	1.75593	0.00492602	1.83244	0.0496807	1.94195	0.112516	2.07237	0.111908	1.81954	0.0739009	2.66313	4.22545	7.18442	2.7721	2.43995	2.49224	15	1.5863	1.84658	2.0453	2.05479	2.26301	2.37534	DD
314	UT499	203531420036_R04C02	H0701	FAC647	BXD62	HFD	0.937158	343	2012-03-06	2012-07-23	2012-08-15	2013-02-12	2012-07-20	F	139	136	3	20.7	27.5	6.8	35.15	9	1.2	1.06815	0.135507	0.870654	-0.0420075	0.927251	0.0498684	0.980866	0.0538658	0.936672	0.0334215	0.915827	0.0902163	2.67506	4.2392	7.19399	2.74392	2.47709	2.51332	10	1.12329	1.38767	1.57808	1.5863	1.76781	2.12055	DD
315	UT500	203531420036_R05C02	H0451	FAC417	BXD70	HFD	1.93989	710	2011-11-06	2011-12-14	2012-03-26	2013-10-16	2012-02-13	F	38	99	-61	22.7	46	23.3	32.35	1.7	1.5	2.4106	0.552338	1.8213	0.125759	2.04486	0.322002	1.9149	0.14517	1.6432	-0.247319	2.26537	0.580596	2.79968	4.37499	7.33078	2.86343	2.67888	2.64558	16	1.44932	1.72808	1.83801	1.84521	2.01096	2.12877	BB
316	UT501	203531420036_R06C02	H1206	FAC1048	BXD62	CD	1.49727	548	2013-02-20	2013-08-09	2013-10-02	2014-08-22		F	170			24.6	24.8	0.2	24.6	10.2	1.7	1.42472	-0.0249614	1.57003	0.220063	1.68125	0.3316	1.58294	0.185204	1.66059	0.20587	1.36248	0.0569579	2.69525	4.26028	7.21884	2.7419	2.5315	2.53519	10	1.44932	1.73493	1.99808	1.99589	2.19795	2.53973	DD
317	UT507	203531420035_R01C01	H1724	FAC1413	BXD61	CD	0.513661	188	2014-05-10	2014-07-25	2014-09-09	2014-11-14		F	76			19.9	26.2	6.3	28.51	14.3	2.6	0.508644	-0.0330758	0.56719	-0.014827	0.487726	-0.0325745	0.537832	-0.0332482	0.386835	-0.0994471	0.421951	-0.0407996	2.67224	4.2326	7.19053	2.69779	2.3863	2.52754	12	1.50959	1.72055	2.071	2.11507	2.37329	2.61918	DD
318	UT510	203531420035_R02C01	H0755	FAC697	BXD90	CD	1.5	549	2011-12-19	2012-07-23	2012-08-15	2013-06-20		F	217			27.6	27.6	0	25.87	12.7	1.3	1.41075	-0.0414544	1.42591	0.0738088	1.32595	-0.0260048	1.38802	-0.0120057	1.33271	-0.124699	1.31987	0.0120026	2.68506	4.24844	7.2062	2.75391	2.48902	2.52586	17	1.29041	1.8	2.02224	1.96438	2.26849	2.7863	BB
319	UT512	203531420035_R03C01	H0628	FAC578	BXD98	HFD	0.983607	360	2012-02-18	2012-07-23	2012-08-15	2013-02-12	2012-07-20	F	156	153	3	22.9	28.3	5.4	47.98	9.1	0.9	0.867031	-0.108493	1.01369	0.0647627	0.795384	-0.121163	1.03265	0.0666149	0.950532	0.00155035	0.887777	0.022368	2.66355	4.22572	7.18183	2.73735	2.4355	2.50532	10	0.986301	1.2	1.55096	1.57945	1.88767	2.05753	BB
320	UT513	203531420035_R04C01	H1751	FAC1196	BXD63	HFD	0.939891	344	2014-01-05	2014-04-11	2014-05-13	2014-12-15	2014-04-11	F	96	96	0	22.1	36.3	14.2	59.91	12.1	3.8	0.855129	-0.0800401	0.868513	-0.0462816	0.771059	-0.108628	0.932512	0.00321538	0.751529	-0.154411	0.907452	0.0794994	2.65348	4.21444	7.17047	2.69474	2.3992	2.49809	11	1.5726	1.8274	2.03935	2.10411	2.25753	2.43562	BB
321	UT515	203531420035_R05C01	H1315	FAC1050	BXD62	HFD	1.49727	548	2013-02-20	2013-08-09	2013-10-02	2014-08-22	2013-08-08	F	170	169	1	24.2	28.7	4.5	22.72	3.8	0.6	1.72303	0.273346	1.29983	-0.0501369	1.80143	0.451774	1.40297	0.00523473	2.29243	0.837707	1.60044	0.294918	2.71439	4.28303	7.24047	2.78657	2.62327	2.56164	10	1.12329	1.38767	1.57808	1.5863	1.76781	2.12055	DD
322	UT520	203531420035_R06C01	H0629	FAC579	BXD98	HFD	0.983607	360	2012-02-18	2012-07-23	2012-08-15	2013-02-12	2012-07-20	F	156	153	3	26.7	29.6	2.9	43.17	14	2.1	0.828495	-0.147028	1.0481	0.0991743	0.892192	-0.0243549	1.09433	0.128289	1.24904	0.300053	1.057	0.191595	2.663	4.2233	7.17902	2.72958	2.44654	2.50822	10	0.986301	1.2	1.55096	1.57945	1.88767	2.05753	BB
323	UT521	203531420035_R01C02	H0772	FAC714	BXD29	CD	1.05191	385	2012-01-23	2012-07-23	2012-08-15	2013-02-11		F	182			25	25.5	0.5	25.87	10	1.2	0.947387	-0.0911888	1.10929	0.107031	1.05693	0.0827847	1.27461	0.251168	1.42754	0.411309	0.997364	0.0734294	2.6512	4.21293	7.17052	2.70075	2.38914	2.49533	18	1.59178	2.02397	2.24444	2.16712	2.48219	3.42466	DD
324	UT523	203531420035_R02C02	H0223	FAC205	BXD66	HFD	0.980874	359	2011-09-12	2011-11-15	2012-03-26	2012-09-05	2012-02-13	F	64	154	-90	23.4	35.5	12.1	57.1	13.9	2.7	0.840479	-0.132522	1.07627	0.129476	0.859786	-0.0544571	0.97896	0.0152194	0.985729	0.0394373	0.920327	0.0572592	2.65805	4.22193	7.18005	2.7387	2.41619	2.49793	7	1.19178	1.38082	1.79022	1.79178	2.28219	2.57534	DD
325	UT526	203531420035_R03C02	H0252	FAC234	BXD86	CD	1.99727	731	2011-10-16	2011-11-15	2012-03-26	2013-10-16		F	30			20.3	21.7	1.4	21.33	8.2	1.8	1.58923	-0.322002	1.82524	0.0848973	1.72636	-0.0448798	1.72073	-0.0972201	1.89015	-0.0568599	1.33698	-0.396956	2.67226	4.23486	7.19004	2.7801	2.45903	2.49415	10	2.21096	2.33151	2.49452	2.46301	2.63562	2.83014	DD
326	UT527	203531420035_R04C02	H1043	FAC885	BXD29	HFD	1.0082	369	2013-04-18	2013-08-09	2013-10-02	2014-04-22	2013-08-08	F	113	112	1	21.8	25	3.2	32.02	15.3	2.5	0.899534	-0.0986881	0.889743	-0.0783816	0.849538	-0.0877422	0.970987	-0.0157161	0.899474	-0.073719	0.864077	-0.0224007	2.6386	4.19831	7.15699	2.72281	2.36395	2.47484	15	1.5863	1.84658	2.0453	2.05479	2.26301	2.37534	DD
327	UT528	203531420035_R05C02	H2519	FAC2082	BXD27	CD	0.989071	362	2015-09-26	2016-01-15	2016-02-17	2016-09-22		F	111			20.4	22	1.6	27.78			0.829866	-0.150701	1.01496	0.0617639	1.21194	0.290783	1.1451	0.174471	1.15746	0.203098	1.00565	0.135555	2.66742	4.22899	7.18437	2.70897	2.43821	2.5117	8	1.51233	1.75548	2.07603	2.03425	2.29795	2.96712	DD
328	UT535	203531420035_R06C02	H0778	FAC720	BXD27	CD	0.617486	226	2012-01-22	2012-07-23	2012-08-15	2012-09-04		F	183			25	24.9	-0.1	23.9	11.9	2.3	0.617064	-0.0204958	0.659881	-0.00319718	0.691972	0.0841295	0.748376	0.0900381	0.760047	0.171541	0.612904	0.0611941	2.67211	4.23608	7.1936	2.68218	2.39818	2.53144	8	1.51233	1.75548	2.07603	2.03425	2.29795	2.96712	DD
329	UT538	203531420006_R01C01	H1361	FAC1176	BXD102	HFD	0.5	183	2013-11-28	2014-01-13	2014-03-11	2014-05-30	2014-01-13	F	46	46	0	12.9	21.2	8.3	23.93	11.6	2	0.494003	-0.0351062	0.525867	-0.0454846	0.464328	-0.0444531	0.481658	-0.0779404	0.401986	-0.0708457	0.420528	-0.030518	2.66724	4.23373	7.18942	2.68015	2.36095	2.51997	13	1.21096	1.81233	2.08325	2.02466	2.5274	2.6	BB
330	UT546	203531420006_R02C01	H0254	FAC236	BXD86	CD	2.03825	746	2011-10-01	2011-11-15	2012-03-26	2013-10-16		F	45			28.5	32.6	4.1	34.15	10.7	1.7	1.61344	-0.33562	1.89165	0.119315	1.46325	-0.342547	1.81694	-0.0354539	2.14861	0.161248	1.49828	-0.270772	2.67442	4.24208	7.20023	2.76915	2.48787	2.51886	10	2.21096	2.33151	2.49452	2.46301	2.63562	2.83014	DD
331	UT553	203531420006_R03C01	H1271	FAC1110	BXD95	CD	1	366	2013-04-22	2013-08-09	2013-10-02	2014-04-23		F	109			22	23.7	1.7	26.97	13.4	1.8	1.03561	0.0449528	1.15958	0.197852	1.12781	0.197444	1.06754	0.0877291	0.790327	-0.174795	0.955834	0.0763787	2.68434	4.25146	7.20756	2.74454	2.42768	2.52414	9	1.11507	1.50822	1.68128	1.67123	1.89726	2.11781	DD
332	UT554	203531420006_R04C01	H1275	FAC1114	BXD95	HFD	0.581967	213	2013-03-17	2013-08-09	2013-10-02	2013-10-16	2013-08-08	F	145	144	1	26.9	40	13.1	41.1	14.5	3.9	0.748047	0.143274	0.636755	0.00140804	0.730965	0.15307	0.612225	-0.0162617	0.674818	0.121283	0.476637	-0.0446395	2.68037	4.24881	7.20572	2.66531	2.40477	2.54884	6	0.830137	0.969863	1.19954	1.19315	1.46438	1.51781	DD
333	UT558	203531420006_R06C01	H0821	FAC758	BXD63	CD	1.59016	582	2011-11-15	2012-07-23	2012-08-15	2013-06-19		F	251			29.4	29.9	0.5	27.92	9.1	1.9	1.45811	-0.0773193	1.53542	0.112923	1.59285	0.164864	1.76101	0.285208	1.8821	0.335914	1.53624	0.151119	2.68844	4.25374	7.21068	2.7375	2.4919	2.53159	7	1.61644	1.74521	2.06536	2.04932	2.31781	2.5863	BB
334	UT562	203531420006_R01C02	H1270	FAC1109	BXD95	CD	1	366	2013-04-22	2013-08-09	2013-10-02	2014-04-23		F	109			21.7	29.8	8.1	32.36	11.1	2.5	1.16066	0.170006	1.15391	0.19218	1.20679	0.276419	1.15831	0.178491	1.18383	0.218712	1.00843	0.128973	2.69677	4.26349	7.21831	2.74642	2.46763	2.54123	9	1.11507	1.50822	1.68128	1.67123	1.89726	2.11781	DD
335	UT565	203531420006_R02C02	H0820	FAC757	BXD63	CD	1.59016	582	2011-11-15	2012-07-23	2012-08-15	2013-06-19		F	251			25	25.9	0.9	23.12	9.6	1.8	1.34524	-0.19019	1.60609	0.183596	1.37254	-0.0554416	1.61081	0.135	1.53192	-0.0142713	1.46441	0.0792901	2.71527	4.28581	7.24243	2.81473	2.56777	2.54625	7	1.61644	1.74521	2.06536	2.04932	2.31781	2.5863	BB
336	UT568	203531420006_R03C02	H0178	FAC163	BXD89	HFD	0.961749	352	2011-09-19	2011-11-14	2012-03-26	2012-09-05	2012-02-13	F	56	147	-91	18.3	21.8	3.5	29.4	16	2.5	0.775927	-0.179419	0.850427	-0.0814336	0.786777	-0.11134	0.881058	-0.0666088	0.699488	-0.227973	0.685921	-0.16076	2.65574	4.2206	7.17717	2.69045	2.36907	2.50868	9	1.33425	1.91918	2.03744	2.06575	2.31781	2.32877	BB
337	UT573	203531420006_R04C02	H1903	FAC1533	BXD70	CD	2.3388	856	2014-05-20	2014-10-22	2014-11-10	2016-09-22		F	155			23.5	27.2	3.7	18.11			1.94985	-0.276647	1.77407	-0.232919	1.64446	-0.414748	1.91558	-0.189401	2.51791	0.234629	2.04888	0.0223191	2.73927	4.3119	7.26868	2.77792	2.5618	2.59088	20	1.19452	1.69863	2.01904	2.06575	2.43904	2.5726	BB
338	UT574	203531420006_R05C02	H0770	FAC712	BXD29	CD	0.614754	225	2012-01-23	2012-07-23	2012-08-15	2012-09-04		F	182			23.2	24.9	1.7	23.7	11.1	1.7	0.613985	-0.021053	0.629088	-0.0318568	0.583573	-0.0219659	0.701323	0.0452818	0.488421	-0.0973958	0.46583	-0.0835389	2.65681	4.22109	7.17877	2.70296	2.37634	2.50179	18	1.59178	2.02397	2.24444	2.16712	2.48219	3.42466	DD
339	UT576	203531420006_R06C02	H0296	FAC274	BXD87	CD	1.58743	581	2011-11-16	2011-12-13	2012-03-26	2013-06-19		F	27			15.5	17.7	2.2	19.67	0	1.9	1.56818	0.0352658	1.24479	-0.175569	1.21696	-0.20872	1.38811	-0.0853949	1.49171	-0.0517891	1.22976	-0.153019	2.69863	4.26629	7.22318	2.81245	2.46429	2.52991	5	1.88767	2.01096	2.22301	2.16438	2.46438	2.74521	DD
[truncated: 15 more columns]
