# Supplementary material for: Genetic loci and metabolic states associated with murine epigenetic aging
Source: eLife. 2022 Apr 7;11:e75244. doi: 10.7554/eLife.75244 (PMC9049972; doi:10.7554/eLife.75244)
Supplement: Supplementary file 2. [file elife-75244-supp2.csv]

Supplementary file 2. CpGs and coefficients for the mouse clocks
Log-linear transformed mouse clocks; unbiased to the BXDs
Mus_musculus.GRCm38.
	385 clock CPGs	174 clock CPGs	190 clock CPGs	103 clock CPGs	357 clock CPGs	78 clock CPGs
ID	CoefPanTissueClock	CoefLiverClock	CoefPanTissueDevelopmentalClock	CoefLiverDevelopmentalClock	CoefPanTissueInterventionalClock	CoefLiverInterventionalClock	SYMBOL	GeneRegionID	seqnames	probeStart	probeEnd	CGstart	CGend	width	strand	seq	annotation	geneChr	geneStart	geneEnd	geneLength	geneStrand	transcriptId	distanceToTSS	flank_txIds	flank_geneIds	flank_gene_distances	genic	Intergenic	Promoter	fiveUTR	threeUTR	Exon	Intron	downstream	distal_intergenic	main_Categories	CpG_number_on_geneRegion	CpGs_number_on_gene	ENTREZID	ENSEMBL	conservationInHuman	CpGislandseqnames	CpGislandstart	CpGislandend	CpGislandwidth	CpGislandstrand	CpGislandlen	CpGislandcount
(Intercept)	-2.057973512	-5.763467293	-3.206714574	0.068125751	-4.192489222	-0.380217891
cg00015319	NA	NA	NA	NA	0.164071836	NA	Hoxc4	Hoxc4_Intergenic_downstream	15	103086525	103086574	103086525	103086526	50	+	CGTTTTATTTGCAGCATCTTTCATGCTGCTGACGATCGTAAAGGGCTTTA	Distal Intergenic	15	103034395	103036852	2458	1	Hoxc4-201	52130	NA	NA	NA	FALSE	TRUE	FALSE	FALSE	FALSE	FALSE	FALSE	FALSE	TRUE	Intergenic_downstream	32	91	15423	ENSMUSG00000075394	mapped to different genes	15	103086384	103086562	179	*	179	16
cg00036788	NA	0.566730536	NA	NA	NA	NA	Gsx2	Gsx2_Intergenic_downstream	5	75084389	75084438	75084389	75084390	50	+	CGTTTAGTCACTGTTTCATTAGGCACTATTTGAACCTTGCAACATGTGGT	Distal Intergenic	5	75075602	75077625	2024	1	Gsx2-202	8787	NA	NA	NA	FALSE	TRUE	FALSE	FALSE	FALSE	FALSE	FALSE	FALSE	TRUE	Intergenic_downstream	5	10	14843	ENSMUSG00000035946	mapped to different genes	5	75084317	75084390	74	*	74	9
cg00096922	NA	NA	NA	NA	-0.002857679	NA	Dlx5	Dlx5_fiveUTR	6	6882079	6882128	6882127	6882128	50	-	GACTGCTGGCTGAGGCGCAGCACAGCCTTGGTTAAATCCTTAATTGCGCG	Promoter (<=1kb)	6	6877805	6882085	4281	2	Dlx5-201	0	Dlx5-202;Dlx5-201;Dlx5-203	Dlx5;Dlx5;Dlx5	0;0;0	TRUE	FALSE	TRUE	TRUE	FALSE	TRUE	FALSE	FALSE	FALSE	fiveUTR	2	6	13395	ENSMUSG00000029755	conserved gene and region	6	6881983	6882197	215	*	215	16
cg00114412	NA	NA	-0.074992743	-0.346758073	NA	NA	Rgs6	Rgs6_threeUTR	12	83150163	83150212	83150211	83150212	50	+	TCCTAAAAACACAATTGCCTAGTGCTGCTGGCGCAGAGTCAGAATGGCCG	3' UTR	12	82616636	83157971	541336	1	Rgs6-209	533527	Rgs6-209;Rgs6-203;Rgs6-216;Rgs6-222;Rgs6-208;Rgs6-205;Rgs6-206;Rgs6-204;Rgs6-207;Rgs6-220	Rgs6;Rgs6;Rgs6;Rgs6;Rgs6;Rgs6;Rgs6;Rgs6;Rgs6;Rgs6	0;0;0;0;0;0;0;0;0;0	TRUE	FALSE	FALSE	FALSE	TRUE	TRUE	TRUE	FALSE	FALSE	threeUTR	4	5	50779	ENSMUSG00000021219	conserved gene and region
cg00134217	NA	NA	NA	0.244500909	NA	NA	Agbl5	Agbl5_Exon	5	30890175	30890224	30890175	30890176	50	+	CGCTGTGGGGGATTGCTGTTCAGTTCTCGCTTTGATTCAGGGAATCTAGC	Exon (Agbl5-203/Agbl5, exon 2 of 4)	5	30888694	30891207	2514	1	Agbl5-203	1481	Agbl5-203;Agbl5-201;Agbl5-207;Agbl5-213;Agbl5-205;Agbl5-218;Agbl5-214;Agbl5-208;Agbl5-215;Agbl5-211;Agbl5-209;Agbl5-202;Agbl5-204;Agbl5-210;Agbl5-217;Agbl5-216;Agbl5-212	Agbl5;Agbl5;Agbl5;Agbl5;Agbl5;Agbl5;Agbl5;Agbl5;Agbl5;Agbl5;Agbl5;Agbl5;Agbl5;Agbl5;Agbl5;Agbl5;Agbl5	0;0;0;0;0;0;0;0;0;0;0;0;0;-58;0;-4773;-4915	TRUE	FALSE	FALSE	FALSE	FALSE	TRUE	FALSE	FALSE	FALSE	Exon	3	5	231093	ENSMUSG00000029165	conserved gene and region
cg00153046	NA	NA	NA	NA	-1.945951944	-0.571984906	Nfat5	Nfat5_threeUTR	8	107372970	107373019	107372970	107372971	50	-	CGTTCAAGTTTTGGATGGTTTATATCTAATGTGTGTTTCATTTTTTTGGA	3' UTR	8	107293470	107379516	86047	1	Nfat5-214	79500	Nfat5-213;Nfat5-214;Nfat5-206;Nfat5-211;Nfat5-203;Nfat5-201;Nfat5-202;Nfat5-207;Nfat5-208	Nfat5;Nfat5;Nfat5;Nfat5;Nfat5;Nfat5;Nfat5;Nfat5;Nfat5	0;0;0;0;0;0;0;0;0	TRUE	FALSE	FALSE	FALSE	TRUE	TRUE	TRUE	FALSE	FALSE	threeUTR	13	17	54446	ENSMUSG00000003847	conserved gene and region
cg00156720	NA	NA	NA	NA	-0.446738262	NA	Gm44690	Gm44690_Intergenic_upstream	7	69950218	69950267	69950218	69950219	50	-	CGGTGGTTGGTAGCTAATGAAGGCCCCTTTAGTTTATCTTCATCAATTGT	Distal Intergenic	7	69883979	69884360	382	2	Gm44690-201	-65907	NA	NA	NA	FALSE	TRUE	FALSE	FALSE	FALSE	FALSE	FALSE	FALSE	TRUE	Intergenic_upstream	15	24	NA	NA	mapped to different genes
cg00158333	NA	NA	0.196337491	NA	NA	NA	Igf2bp1	Igf2bp1_Intron	11	96004885	96004934	96004885	96004886	50	+	CGCCCCACTTTCAAATCAAAATGGCTCAAGCCCCAGGCCCTGGGCGGGAG	Intron (Igf2bp1-201/Igf2bp1, intron 1 of 14)	11	95957163	96005940	48778	2	Igf2bp1-201	1006	Igf2bp1-201	Igf2bp1	0	TRUE	FALSE	FALSE	FALSE	FALSE	FALSE	TRUE	FALSE	FALSE	Intron	1	1	140486	ENSMUSG00000013415	conserved gene and region	11	96004571	96004886	316	*	316	41
cg00192066	NA	NA	-0.287204403	NA	NA	NA	Smad1	Smad1_Intron	8	79382027	79382076	79382075	79382076	50	-	AAACATCTTTACAAGTTATATCCTTTTACAAACCAACATATGGTCTCACG	Intron (Smad1-202/Smad1, intron 1 of 6)	8	79338395	79399518	61124	2	Smad1-202	17442	Smad1-202;Smad1-203;Smad1-201	Smad1;Smad1;Smad1	0;0;0	TRUE	FALSE	FALSE	FALSE	FALSE	FALSE	TRUE	FALSE	FALSE	Intron	1	1	17125	ENSMUSG00000031681	mapped to different genes
cg00242883	NA	NA	0.146587418	NA	NA	NA	Prkd1	Prkd1_Intergenic_downstream	12	50259152	50259201	50259152	50259153	50	+	CGAATCCTCCTGGAGACAAAAGAAAGAATTGGTTCCAGTGCCTTTTTCAA	Distal Intergenic	12	50341231	50649098	307868	2	Prkd1-201	389897	NA	NA	NA	FALSE	TRUE	FALSE	FALSE	FALSE	FALSE	FALSE	FALSE	TRUE	Intergenic_downstream	6	8	18760	ENSMUSG00000002688	conserved gene but different region
cg00258262	0.030479974	NA	NA	NA	NA	NA	Gm17304	Gm17304_Intron	5	106554673	106554722	106554673	106554674	50	+	CGGGATAGTAGGTGTCCCAAAATGTCTTAATTCAGAGAATTAGTGTTAAC	Intron (Gm28050-202/Gm28050-202, intron 1 of 2)	5	106609098	106609201	104	1	Gm17304-201	-54376	NA	NA	NA	TRUE	FALSE	FALSE	FALSE	FALSE	FALSE	TRUE	FALSE	FALSE	Intron	26	35	NA	NA	mapped to different genes
cg00264615	NA	NA	NA	NA	-0.017875901	NA	Fezf2	Fezf2_Intergenic_downstream	14	12338346	12338395	12338346	12338347	50	+	CGCAGCTGCCTTGAGGTTGTTTATTTCCCAGCGTTTTCTCAAGACTCCTG	Distal Intergenic	14	12342094	12345844	3751	2	Fezf2-203	7449	Fezf2-203;Fezf2-201;Fezf2-202	Fezf2;Fezf2;Fezf2	0;0;0	FALSE	TRUE	FALSE	FALSE	FALSE	FALSE	FALSE	FALSE	TRUE	Intergenic_downstream	21	45	54713	ENSMUSG00000021743	mapped to different genes
cg00295657	NA	NA	NA	NA	0.072736538	NA	Hoxb6	Hoxb6_Intron	11	96298956	96299005	96298956	96298957	50	+	CGCTCCTCCTGGGTGCTATTTGACAATTCCTGCCTCTGCCATTGGTCAGT	Intron (Hoxb6-202/Hoxb6, intron 1 of 2)	11	96292476	96301569	9094	1	Hoxb6-202	6480	Hoxb5-202;Hoxb5-201;Hoxb6-202;Hoxb6-201	Hoxb5;Hoxb5;Hoxb6;Hoxb6	0;0;0;0	TRUE	FALSE	FALSE	FALSE	FALSE	FALSE	TRUE	FALSE	FALSE	Intron	4	16	15414	ENSMUSG00000000690	conserved gene and region
cg00315292	-0.28436039	NA	NA	NA	NA	NA	Irx4	Irx4_Intergenic_downstream	13	73272093	73272142	73272141	73272142	50	-	ATTAAGCGAGTCTGACAGCAGCATATTCAGGCTCGACAAGGGAACAGGCG	Downstream (2-3kb)	13	73260497	73269608	9112	1	Irx4-201	11645	Irx4-202;Irx4-201	Irx4;Irx4	0;0	FALSE	TRUE	FALSE	FALSE	FALSE	FALSE	FALSE	FALSE	FALSE	Intergenic_downstream	6	7	50916	ENSMUSG00000021604	conserved gene and region	13	73271779	73272166	388	*	388	36
cg00384342	NA	NA	-0.334016281	NA	NA	NA	Dync1i1	Dync1i1_Intron	6	6005367	6005416	6005367	6005368	50	-	CGTTTTATTTCTGGTGTACTTTCAAACTTGCCTCTGACTTCTGTGCTATT	Intron (Dync1i1-203/Dync1i1, intron 14 of 16)	6	5725639	6028039	302401	1	Dync1i1-203	279728	Dync1i1-203;Dync1i1-202;Dync1i1-204;Dync1i1-201;Dync1i1-206	Dync1i1;Dync1i1;Dync1i1;Dync1i1;Dync1i1	0;0;0;0;0	TRUE	FALSE	FALSE	FALSE	FALSE	FALSE	TRUE	FALSE	FALSE	Intron	2	9	13426	ENSMUSG00000029757	conserved gene and region
cg00462525	NA	NA	NA	NA	0.233259578	NA	Tbr1	Tbr1_Exon	2	61807272	61807321	61807272	61807273	50	+	CGGACAGATGGTGGTTTTACAGTCCTTGCACAAGTACCAGCCCCGCCTGC	Exon (Tbr1-201/Tbr1, exon 4 of 6)	2	61804453	61814114	9662	1	Tbr1-201	2819	Tbr1-204;Tbr1-201;Tbr1-202;Tbr1-203	Tbr1;Tbr1;Tbr1;Tbr1	0;0;0;0	TRUE	FALSE	FALSE	FALSE	FALSE	TRUE	TRUE	FALSE	FALSE	Exon	24	27	21375	ENSMUSG00000035033	conserved gene and region	2	61807120	61807273	154	*	154	15
cg00465284	NA	NA	NA	NA	0.889589353	NA	Ctnna2	Ctnna2_Intron	6	77242630	77242679	77242630	77242631	50	+	CGCACAATCGTGAGCAGCTTACGACACTCAGTGAGCAGTAGGTGCCTGTG	Intron (Ctnna2-204/Ctnna2, intron 8 of 19)	6	76881637	77979699	1098063	2	Ctnna2-204	737020	Ctnna2-204;Ctnna2-205;Ctnna2-202;Ctnna2-201;Lrrtm1-201;Lrrtm1-202;Lrrtm1-203;Lrrtm1-204	Ctnna2;Ctnna2;Ctnna2;Ctnna2;Lrrtm1;Lrrtm1;Lrrtm1;Lrrtm1	0;0;0;0;0;0;0;0	TRUE	FALSE	FALSE	FALSE	FALSE	FALSE	TRUE	FALSE	FALSE	Intron	4	24	12386	ENSMUSG00000063063	conserved gene and region	6	77242605	77243155	551	*	551	46
cg00474657	NA	NA	-0.003754004	NA	NA	NA	Spns1	Spns1_Exon	7	126375075	126375124	126375123	126375124	50	+	GGATGAAGGATGACCCCAGTGTCACCAGGGACCAGAAGGCAATGCCCCCG	Exon (Spns1-201/Spns1, exon 3 of 12)	7	126370060	126377450	7391	2	Spns1-201	2326	Spns1-201;Spns1-202;Spns1-203;Spns1-204;Spns1-206;Spns1-211;Spns1-205;Spns1-210;Spns1-209;Spns1-207;Spns1-208;Spns1-212;Spns1-213	Spns1;Spns1;Spns1;Spns1;Spns1;Spns1;Spns1;Spns1;Spns1;Spns1;Spns1;Spns1;Spns1	0;0;0;0;0;0;-2156;0;-2513;0;-712;0;2297	TRUE	FALSE	FALSE	FALSE	FALSE	TRUE	FALSE	FALSE	FALSE	Exon	1	1	73658	ENSMUSG00000030741	conserved gene and region
cg00482994	NA	NA	NA	NA	-0.494754581	NA	Brd2	Brd2_threeUTR	17	34114462	34114511	34114462	34114463	50	+	CGGTTCTCCATCTTCCGCTGCAGAAGGAGGCAGCATCAGAAGCTGCACAG	3' UTR	17	34112023	34121747	9725	2	Brd2-203	7236	Brd2-203;Brd2-201;Brd2-207;Brd2-202;Brd2-216;Brd2-204;Brd2-205;Brd2-215;Brd2-209;Brd2-210;Brd2-214;Brd2-206;Brd2-208;Brd2-217;Brd2-219	Brd2;Brd2;Brd2;Brd2;Brd2;Brd2;Brd2;Brd2;Brd2;Brd2;Brd2;Brd2;Brd2;Brd2;Brd2	0;0;0;0;-609;-730;0;0;0;0;0;0;959;1925;2684	TRUE	FALSE	FALSE	FALSE	TRUE	TRUE	TRUE	FALSE	FALSE	threeUTR	2	3	14312	ENSMUSG00000024335	conserved gene and region
cg00493887	NA	NA	-0.542278852	NA	NA	NA	Dpysl3	Dpysl3_threeUTR	18	43363510	43363559	43363558	43363559	50	+	AGCCATCTTCCATGTAAATATCAGCATAAAAGGACTGATCATCATTGACG	3' UTR	18	43320984	43438286	117303	2	Dpysl3-204	74727	Dpysl3-204;Dpysl3-206;Dpysl3-202;Dpysl3-201	Dpysl3;Dpysl3;Dpysl3;Dpysl3	0;0;0;0	TRUE	FALSE	FALSE	FALSE	TRUE	TRUE	FALSE	FALSE	FALSE	threeUTR	2	2	22240	ENSMUSG00000024501	conserved gene but different region
cg00519323	0.383921727	NA	NA	NA	NA	NA	Gm28267	Gm28267_Intergenic_upstream	9	100325359	100325408	100325359	100325360	50	-	CGATGTCTGCTAAGAAACCCAATTTCCATGATGAATTGCCCGAAGCCCCT	Distal Intergenic	9	100404495	100404759	265	1	Gm28267-201	-79136	NA	NA	NA	FALSE	TRUE	FALSE	FALSE	FALSE	FALSE	FALSE	FALSE	TRUE	Intergenic_upstream	29	29	NA	NA	mapped to different genes
cg00522402	NA	NA	0.212992018	NA	NA	NA	Rsrc1	Rsrc1_Intron	3	67340967	67341016	67340967	67340968	50	+	CGGGGAAAAATCTCCTGCGAGACAAGGGTAAATTGAGCATTGAATTACAT	Intron (Rsrc1-206/Rsrc1, intron 7 of 9)	3	66981390	67356559	375170	1	Rsrc1-206	359577	Rsrc1-206;Rsrc1-203;Rsrc1-202;Rsrc1-201;Rsrc1-209;Rsrc1-205	Rsrc1;Rsrc1;Rsrc1;Rsrc1;Rsrc1;Rsrc1	0;0;0;0;0;0	TRUE	FALSE	FALSE	FALSE	FALSE	FALSE	TRUE	FALSE	FALSE	Intron	31	37	66880	ENSMUSG00000034544	conserved gene and region
cg00549985	NA	-0.165099145	NA	NA	NA	NA	Cntfr	Cntfr_Intron	4	41684964	41685013	41684964	41684965	50	+	CGCTTTATCAGGAGACGCTTTTCTGACTTGGCAGCGTTGGGCGTTTTAAA	Intron (Cntfr-203/Cntfr, intron 2 of 9)	4	41657498	41695442	37945	2	Cntfr-203	10429	Cntfr-203;Cntfr-204;Cntfr-201;Cntfr-202;Cntfr-205	Cntfr;Cntfr;Cntfr;Cntfr;Cntfr	0;0;0;0;0	TRUE	FALSE	FALSE	FALSE	FALSE	FALSE	TRUE	FALSE	FALSE	Intron	9	12	12804	ENSMUSG00000028444	conserved gene and region	4	41684854	41685032	179	*	179	13
cg00570985	NA	NA	0.441197177	NA	NA	NA	Plekha6	Plekha6_Exon	1	133294605	133294654	133294605	133294606	50	-	CGTGCCCCAGGACTCAGAGAGCCAGCTGCAGGAGCAGGAGAAGCGGATTG	Exon (Plekha6-204/Plekha6, exon 21 of 23)	1	133181321	133301219	119899	1	Plekha6-204	113284	Plekha6-204;Plekha6-202;Plekha6-201;Plekha6-203;Plekha6-207;Plekha6-210;Plekha6-208	Plekha6;Plekha6;Plekha6;Plekha6;Plekha6;Plekha6;Plekha6	0;0;0;0;0;2855;0	TRUE	FALSE	FALSE	FALSE	FALSE	TRUE	FALSE	FALSE	FALSE	Exon	5	7	240753	ENSMUSG00000041757	conserved gene and region
cg00587168	0.023311728	NA	NA	NA	NA	NA	Dlx1	Dlx1_Intergenic_downstream	2	71538050	71538099	71538098	71538099	50	+	AAAAATTTTAAAGCAGCAGCAGTTACCATGCAATTCAGGCTAATTCTGCG	Distal Intergenic	2	71530780	71532689	1910	1	Dlx1-206	7270	Dlx1-201;Dlx1-203	Dlx1;Dlx1	0;0	FALSE	TRUE	FALSE	FALSE	FALSE	FALSE	FALSE	FALSE	TRUE	Intergenic_downstream	9	36	13390	ENSMUSG00000041911	conserved gene and region
cg00597719	NA	0.516287307	NA	NA	NA	NA	Prox1	Prox1_Intron	1	190128881	190128930	190128929	190128930	50	+	ACATGCATCAGCTGTTGGGCTTTTGTTACGGGTATTGTAGAACTAATCCG	Intron (Prox1-202/Prox1, intron 4 of 4)	1	190118035	190170714	52680	2	Prox1-202	41784	Prox1-202;Prox1-201;Prox1-203	Prox1;Prox1;Prox1	0;0;0	TRUE	FALSE	FALSE	FALSE	FALSE	FALSE	TRUE	FALSE	FALSE	Intron	18	59	19130	ENSMUSG00000010175	conserved gene but different region
cg00618420	NA	NA	NA	NA	-0.139657697	NA	Zfp536	Zfp536_Exon	7	37772998	37773047	37773046	37773047	50	-	TATCTGGTAGGTGAAATGCATTGTACCATTAAAAACGCTCTCCATTGTCG	Promoter (<=1kb)	7	37569629	37773641	204013	2	Zfp536-208	594	Zfp536-202;Zfp536-201;Zfp536-203;Zfp536-206;Zfp536-209;Zfp536-208;Zfp536-205;Zfp536-207;Zfp536-210	Zfp536;Zfp536;Zfp536;Zfp536;Zfp536;Zfp536;Zfp536;Zfp536;Zfp536	0;0;0;0;0;0;0;0;0	TRUE	FALSE	TRUE	FALSE	FALSE	TRUE	TRUE	FALSE	FALSE	Exon	13	112	243937	ENSMUSG00000043456	conserved gene but different region
cg00638788	NA	NA	NA	0.082426944	NA	NA	Gbf1	Gbf1_Exon	19	46254597	46254646	46254645	46254646	50	+	GGTGCAGCTGCTCTTCACAAGGTAAACCTGCTGCTGTTTGCTTCAGCCCG	Exon (Gbf1-201/Gbf1, exon 7 of 40)	19	46152509	46286510	134002	1	Gbf1-201	102088	Gbf1-201;Gbf1-204;Gbf1-214;Gbf1-213;Gbf1-210	Gbf1;Gbf1;Gbf1;Gbf1;Gbf1	0;0;0;0;0	TRUE	FALSE	FALSE	FALSE	FALSE	TRUE	TRUE	FALSE	FALSE	Exon	8	18	107338	ENSMUSG00000025224	conserved gene but different region
cg00666549	NA	NA	-0.024058671	NA	NA	NA	Stac3	Stac3_Intergenic_downstream	10	127510332	127510381	127510332	127510333	50	+	CGGCAGCTGTCCCTAATTAGAGCGGCGGTTTAATTGGATTTATCAGCAGT	Distal Intergenic	10	127507225	127507992	768	1	Stac3-205	3107	Ndufa4l2-203;Ndufa4l2-202;Ndufa4l2-201;Stac3-202;Stac3-201;Stac3-204;Stac3-205	Ndufa4l2;Ndufa4l2;Ndufa4l2;Stac3;Stac3;Stac3;Stac3	-4586;-4586;0;0;0;5841;0	FALSE	TRUE	FALSE	FALSE	FALSE	FALSE	FALSE	FALSE	TRUE	Intergenic_downstream	3	4	237611	ENSMUSG00000040287	mapped to different genes
cg00688252	NA	NA	NA	NA	-0.136137645	NA	Zfhx3	Zfhx3_Intron	8	108823041	108823090	108823089	108823090	50	+	TGTTGACATTTTAATGCGAATTATGTCATGTGGTATCCCCTTTGATTTCG	Intron (Zfhx3-204/Zfhx3, intron 9 of 15)	8	107942644	108961630	1018987	1	Zfhx3-204	880397	Zfhx3-204;Zfhx3-201	Zfhx3;Zfhx3	0;0	TRUE	FALSE	FALSE	FALSE	FALSE	FALSE	TRUE	FALSE	FALSE	Intron	114	177	11906	ENSMUSG00000038872	conserved gene and region
cg00689651	NA	NA	NA	NA	0.094681666	NA	Lyl1	Lyl1_threeUTR	8	84704725	84704774	84704773	84704774	50	-	TCTTTATTTCTTTATTTCACATACACATTAGCCATTCAATGGAGAAGCCG	3' UTR	8	84701482	84704940	3459	1	Lyl1-204	3243	Lyl1-203;Lyl1-204;Lyl1-201;Lyl1-202;Nfix-207;Nfix-208;Nfix-204;Nfix-201;Nfix-202;Nfix-203;Nfix-206;Trmt1-201;Trmt1-203;Trmt1-204;Trmt1-211;Trmt1-205;Trmt1-210;Trmt1-218	Lyl1;Lyl1;Lyl1;Lyl1;Nfix;Nfix;Nfix;Nfix;Nfix;Nfix;Nfix;Trmt1;Trmt1;Trmt1;Trmt1;Trmt1;Trmt1;Trmt1	3276;0;3181;2944;0;0;0;0;0;0;0;15859;15478;15461;15442;15261;6327;5654	TRUE	FALSE	FALSE	FALSE	TRUE	TRUE	TRUE	TRUE	FALSE	threeUTR	2	2	17095	ENSMUSG00000034041	mapped to different genes
cg00704763	NA	NA	-0.022777722	NA	NA	NA	Bcor	Bcor_Intron	X	12085478	12085527	12085526	12085527	50	-	CTAATGCATAATGCACAGCGCCTGGAAGCCCGGCCATTAGCGGCCTGTCG	Intron (Bcor-201/Bcor, intron 1 of 13)	20	12036743	12160355	123613	2	Bcor-201	74828	Bcor-202;Bcor-203;Bcor-204;Bcor-206;Bcor-201;Bcor-207;Bcor-205	Bcor;Bcor;Bcor;Bcor;Bcor;Bcor;Bcor	0;0;0;0;0;0;0	TRUE	FALSE	FALSE	FALSE	FALSE	FALSE	TRUE	FALSE	FALSE	Intron	56	74	71458	ENSMUSG00000040363	conserved gene and region	X	12085326	12085682	357	*	357	18
cg00740694	NA	NA	NA	NA	-1.239627022	NA	Fzd2	Fzd2_Exon	11	102604824	102604873	102604824	102604825	50	+	CGGGGAGAAGGGCATCTCCATCCCGGACCACGGCTTCTGCCAGCCCATCT	Promoter (<=1kb)	11	102604396	102608058	3663	1	Fzd2-201	428	Fzd2-201	Fzd2	0	TRUE	FALSE	TRUE	FALSE	FALSE	TRUE	FALSE	FALSE	FALSE	Exon	3	3	57265	ENSMUSG00000050288	conserved gene and region	11	102604502	102604897	396	*	396	47
cg00750099	NA	0.035223577	NA	NA	NA	NA	Pomc	Pomc_Exon	12	3960115	3960164	3960115	3960116	50	+	CGCGAGGGCAAGCGCTCCTACTCCATGGAGCACTTCCGCTGGGGCAAGCC	Exon (Pomc-204/Pomc, exon 4 of 4)	12	3954951	3960573	5623	1	Pomc-204	5164	Efr3b-201;Efr3b-203;Pomc-204;Pomc-202;Pomc-201;Pomc-203;Pomc-205	Efr3b;Efr3b;Pomc;Pomc;Pomc;Pomc;Pomc	78751;32756;0;0;0;5146;5145	TRUE	FALSE	FALSE	FALSE	FALSE	TRUE	FALSE	FALSE	FALSE	Exon	2	2	18976	ENSMUSG00000020660	conserved gene and region	12	3959827	3960450	624	*	624	52
cg00773632	NA	1.22433505	NA	NA	NA	NA	Ntm	Ntm_Intron	9	29939620	29939669	29939620	29939621	50	+	CGCCTATTAAAAAGCGGCCTTATTAATGGAATTGTACATCTAGGATTAAT	Intron (Ntm-201/Ntm, intron 1 of 7)	9	28994750	29963129	968380	2	Ntm-201	23460	Ntm-201;Ntm-204;Ntm-210;Ntm-207;Ntm-209	Ntm;Ntm;Ntm;Ntm;Ntm	0;0;0;0;0	TRUE	FALSE	FALSE	FALSE	FALSE	FALSE	TRUE	FALSE	FALSE	Intron	27	32	235106	ENSMUSG00000059974	conserved gene and region
cg00776597	NA	NA	NA	-0.092362926	NA	NA	Pcsk5	Pcsk5_threeUTR	19	17560416	17560465	17560416	17560417	50	-	CGTCAAATTTTGGCATCAAATGCTTTGGTCATACAATACTGTCTCTGTGG	3' UTR	19	17432319	17837632	405314	2	Pcsk5-201	277167	Pcsk5-201;Pcsk5-202;Pcsk5-204	Pcsk5;Pcsk5;Pcsk5	0;0;0	TRUE	FALSE	FALSE	FALSE	TRUE	TRUE	TRUE	FALSE	FALSE	threeUTR	1	7	18552	ENSMUSG00000024713	conserved gene and region
cg00784834	NA	NA	NA	NA	0.203005994	NA	Gm9211	Gm9211_Intergenic_downstream	7	36329303	36329352	36329303	36329304	50	+	CGGAGTCTCTCAGCCCAACGAAGCTGCTGTGTCTTTGCCCCTGGATTTTA	Distal Intergenic	7	36234292	36235266	975	1	Gm9211-201	95011	NA	NA	NA	FALSE	TRUE	FALSE	FALSE	FALSE	FALSE	FALSE	FALSE	TRUE	Intergenic_downstream	12	15	668507	NA	mapped to different genes
cg00823476	NA	-0.569601468	NA	-0.777503921	NA	NA	Pdik1l	Pdik1l_fiveUTR	4	134284506	134284555	134284506	134284507	50	-	CGTACTTTGGCTGGCTACTCACCATCTTCAAGGTCGAGGTTTCTGGAAAA	5' UTR	4	134275002	134287239	12238	2	Pdik1l-203	2684	Pdik1l-203;Pdik1l-201;Pdik1l-202;Pdik1l-206;Pdik1l-204;Pdik1l-205	Pdik1l;Pdik1l;Pdik1l;Pdik1l;Pdik1l;Pdik1l	0;0;0;0;0;0	TRUE	FALSE	FALSE	TRUE	FALSE	TRUE	TRUE	FALSE	FALSE	fiveUTR	3	8	230809	ENSMUSG00000050890	conserved gene but different region	4	134284376	134284541	166	*	166	11
cg00833227	NA	-0.011006499	NA	NA	NA	NA	Ahdc1	Ahdc1_Intron	4	133043070	133043119	133043070	133043071	50	+	CGGCAACAGTCCCCCCAGAACAGGCGGAGTGTGTGTCTGCCATTAGCGAC	Intron (Ahdc1-210/Ahdc1, intron 2 of 3)	4	133011260	133060820	49561	1	Ahdc1-210	31810	Ahdc1-210;Ahdc1-203;Ahdc1-204;Ahdc1-205;Ahdc1-207;Ahdc1-211;Ahdc1-209;Ahdc1-206;Ahdc1-201;Ahdc1-202	Ahdc1;Ahdc1;Ahdc1;Ahdc1;Ahdc1;Ahdc1;Ahdc1;Ahdc1;Ahdc1;Ahdc1	0;0;0;0;0;0;0;0;0;0	TRUE	FALSE	FALSE	FALSE	FALSE	FALSE	TRUE	FALSE	FALSE	Intron	35	49	230793	ENSMUSG00000037692	conserved gene and region	4	133043047	133043197	151	*	151	12
cg00855137	NA	NA	NA	NA	-0.393234655	NA	Rpl35a-ps4	Rpl35a-ps4_Intergenic_downstream	2	108827636	108827685	108827684	108827685	50	-	GGAGACAAATACCGCGGATGTGAAAGGTGTCGCTGGGATTACCAATGACG	Distal Intergenic	2	108874926	108875258	333	2	Rpl35a-ps4-201	47622	NA	NA	NA	FALSE	TRUE	FALSE	FALSE	FALSE	FALSE	FALSE	FALSE	TRUE	Intergenic_downstream	2	2	100043423	NA	mapped to different genes
cg00863740	-0.031967735	NA	NA	NA	NA	NA	Cpeb2	Cpeb2_Exon	5	43233932	43233981	43233932	43233933	50	+	CGCAGGACTTCAGTAAGCGGCAGCAGCAGCAGCTGAGCAGCCAGAAGAGG	Promoter (<=1kb)	5	43233170	43289723	56554	1	Cpeb2-204	762	Cpeb2-204;Cpeb2-201;Cpeb2-205;Cpeb2-206;Cpeb2-202;Cpeb2-207;Cpeb2-203	Cpeb2;Cpeb2;Cpeb2;Cpeb2;Cpeb2;Cpeb2;Cpeb2	0;0;0;0;0;-1069;0	TRUE	FALSE	TRUE	FALSE	FALSE	TRUE	TRUE	FALSE	FALSE	Exon	5	11	231207	ENSMUSG00000039782	conserved gene and region	5	43233379	43233950	572	*	572	69
cg00893084	-0.013056231	NA	NA	NA	NA	NA	Lrp1	Lrp1_Exon	10	127553532	127553581	127553532	127553533	50	-	CGATCAGTGAATGGTCACCCCAGTCTGTCCAGTACAGGTACCTGGCGATG	Exon (Lrp1-201/Lrp1, exon 60 of 89)	10	127538161	127621148	82988	2	Lrp1-201	67567	Lrp1-201;Lrp1-205	Lrp1;Lrp1	0;-3615	TRUE	FALSE	FALSE	FALSE	FALSE	TRUE	TRUE	FALSE	FALSE	Exon	8	8	16971	ENSMUSG00000040249	conserved gene and region	10	127553362	127553533	172	*	172	15
cg00910419	1.480099417	NA	NA	NA	2.770217262	0.151610595	Bcl11a	Bcl11a_fiveUTR	11	24078020	24078069	24078068	24078069	50	-	CCCATGTTTTGTGTGTCTCTGTCCATCCAGACTCCTGACGTTCAAGTTCG	Promoter (<=1kb)	11	24078056	24173194	95139	1	Bcl11a-201	0	A830031A19Rik-201;Bcl11a-201;Bcl11a-203;Bcl11a-205;Bcl11a-202;Bcl11a-204	A830031A19Rik;Bcl11a;Bcl11a;Bcl11a;Bcl11a;Bcl11a	0;0;0;0;0;0	TRUE	FALSE	TRUE	TRUE	FALSE	TRUE	FALSE	FALSE	FALSE	fiveUTR	10	98	14025	ENSMUSG00000000861	conserved gene and region
cg01033486	-0.007251794	NA	NA	NA	NA	NA	Sox2	Sox2_Promoter	3	34640775	34640824	34640823	34640824	50	-	ATTTAGCCTTTAATCTCTTTTTATCCACGAAGACTAAAGCTCTGTACTCG	Promoter (9-10kb)	3	34650405	34652461	2057	1	Sox2-201	-9630	NA	NA	NA	TRUE	FALSE	TRUE	FALSE	FALSE	FALSE	TRUE	FALSE	FALSE	Promoter	7	62	20674	ENSMUSG00000074637	mapped to different genes	3	34640800	34640945	146	*	146	19
cg01038105	NA	NA	NA	-0.169515582	NA	NA	Ctnnd1	Ctnnd1_fiveUTR	2	84622016	84622065	84622064	84622065	50	-	GTCCGTTGAGTTTCAAATCTGAAAATTTCTGTCTTTCAAGGTCAGCATCG	5' UTR	2	84600071	84650745	50675	2	Ctnnd1-204	28680	Ctnnd1-204;Ctnnd1-206;Ctnnd1-207;Ctnnd1-208;Ctnnd1-209;Ctnnd1-216;Ctnnd1-220;Ctnnd1-221;Ctnnd1-222;Ctnnd1-224;Ctnnd1-203;Ctnnd1-211;Ctnnd1-212;Ctnnd1-213;Ctnnd1-214;Ctnnd1-215;Ctnnd1-218;Ctnnd1-219;Ctnnd1-210;Ctnnd1-205;Ctnnd1-223;Ctnnd1-201;Ctnnd1-202;Ctnnd1-228;Ctnnd1-217;Ctnnd1-225;Ctnnd1-229;Gm28635-201	Ctnnd1;Ctnnd1;Ctnnd1;Ctnnd1;Ctnnd1;Ctnnd1;Ctnnd1;Ctnnd1;Ctnnd1;Ctnnd1;Ctnnd1;Ctnnd1;Ctnnd1;Ctnnd1;Ctnnd1;Ctnnd1;Ctnnd1;Ctnnd1;Ctnnd1;Ctnnd1;Ctnnd1;Ctnnd1;Ctnnd1;Ctnnd1;Ctnnd1;Ctnnd1;Ctnnd1;Gm28635	0;0;0;0;0;0;0;0;0;0;0;0;0;0;0;0;0;0;0;0;0;0;0;0;0;0;0;0	TRUE	FALSE	FALSE	TRUE	FALSE	TRUE	TRUE	FALSE	FALSE	fiveUTR	3	4	12388	ENSMUSG00000034101	mapped to different genes
cg01053921	NA	NA	0.048539697	NA	NA	NA	Zfp362	Zfp362_Exon	4	128777385	128777434	128777433	128777434	50	+	GAGTGAAAGCCTTCTCGCAGCCAGGATGTGGGCACTTGTAGGGTCTGTCG	Exon (Zfp362-202/Zfp362, exon 7 of 9)	4	128773088	128806045	32958	2	Zfp362-202	28611	Zfp362-202;Zfp362-201;Zfp362-204	Zfp362;Zfp362;Zfp362	0;0;0	TRUE	FALSE	FALSE	FALSE	FALSE	TRUE	FALSE	FALSE	FALSE	Exon	4	7	230761	ENSMUSG00000028799	conserved gene and region
cg01061575	1.22039828	NA	NA	NA	NA	NA	Prr5	Prr5_fiveUTR	15	84681195	84681244	84681195	84681196	50	+	CGCAGGTTGAAGTTCATGAGTTCGCCCAGCCTCAGTGACCTGGGCAAGAG	5' UTR	15	84669620	84703673	34054	1	Prr5-202	11575	Prr5-202;Prr5-201	Prr5;Prr5	0;0	TRUE	FALSE	FALSE	TRUE	FALSE	TRUE	TRUE	FALSE	FALSE	fiveUTR	1	2	109270	ENSMUSG00000036106	mapped to different genes	15	84680905	84681714	810	*	810	95
cg01090334	NA	NA	NA	NA	0.871737413	0.253526181	Cnksr2	Cnksr2_Exon	X	157919807	157919856	157919855	157919856	50	+	CTCTGAGGTCGCTTTTTCAAAGTTAAGATAACACCACTCGGGTCCTCTCG	Exon (Cnksr2-201/Cnksr2, exon 9 of 22)	20	157821436	158043294	221859	2	Cnksr2-201	123438	Cnksr2-201;Cnksr2-202	Cnksr2;Cnksr2	0;0	TRUE	FALSE	FALSE	FALSE	FALSE	TRUE	FALSE	FALSE	FALSE	Exon	6	11	245684	ENSMUSG00000025658	conserved gene but different region
cg01107103	NA	0.207160222	NA	NA	NA	NA	Gm12131	Gm12131_Intergenic_downstream	11	39228571	39228620	39228619	39228620	50	-	CAATAAATCAAAGACATCTGCTTGTCACCACCAGATGCTTGGCCACATCG	Distal Intergenic	11	39727070	39727712	643	2	Gm12131-201	499141	NA	NA	NA	FALSE	TRUE	FALSE	FALSE	FALSE	FALSE	FALSE	FALSE	TRUE	Intergenic_downstream	4	4	NA	NA	mapped to different genes
cg01149078	-0.145401635	NA	NA	NA	NA	NA	Sox14	Sox14_Intergenic_downstream	9	99869266	99869315	99869266	99869267	50	-	CGGAATTGCACCTTGGGCAGCGGAGCAGAATCCGGAATGTGAACTTCTCC	Distal Intergenic	9	99874220	99875655	1436	2	Sox14-202	6389	Sox14-201;Sox14-202	Sox14;Sox14	0;0	FALSE	TRUE	FALSE	FALSE	FALSE	FALSE	FALSE	FALSE	TRUE	Intergenic_downstream	12	18	20669	ENSMUSG00000053747	mapped to different genes	9	99869255	99869839	585	*	585	42
cg01153660	-1.085821657	NA	NA	NA	NA	NA	Hoxc5	Hoxc5_Intron	15	102998050	102998099	102998050	102998051	50	+	CGACCGCGGCGCCCATTTGCACACGCTACACAAATGCATCGCATTCCCGG	Intron (Hoxc5-202/Hoxc5, intron 1 of 1)	15	102967443	103015676	48234	1	Hoxc5-202	30607	Hoxc5-202;Hoxc6-202;Hoxc6-203;Hoxc8-201;Hoxc8-202	Hoxc5;Hoxc6;Hoxc6;Hoxc8;Hoxc8	0;0;0;0;0	TRUE	FALSE	FALSE	FALSE	FALSE	FALSE	TRUE	FALSE	FALSE	Intron	46	134	15424	ENSMUSG00000022485	conserved gene but different region	15	102997967	102998098	132	*	132	9
cg01190601	NA	-0.097701802	NA	NA	NA	NA	Erbb4	Erbb4_Intron	1	69105039	69105088	69105087	69105088	50	-	CTGAACTCCAAGCGTGTCTAATAATGCGAGAAGCAGATTGTCTTCCCTCG	Intron (Erbb4-201/Erbb4, intron 1 of 27)	1	68032186	69107756	1075571	2	Erbb4-201	2668	Erbb4-201;Erbb4-202;Erbb4-205	Erbb4;Erbb4;Erbb4	0;0;0	TRUE	FALSE	FALSE	FALSE	FALSE	FALSE	TRUE	FALSE	FALSE	Intron	10	13	13869	ENSMUSG00000062209	conserved gene and region
cg01227361	NA	NA	NA	NA	-1.469344509	NA	Tenm4	Tenm4_Exon	7	96644125	96644174	96644125	96644126	50	+	CGGACTCAGACTCTGAGGAAGAGTTTGTCCCTAATTCATTCTTAGTTAAA	Promoter (<=1kb)	7	96644172	96732280	88109	1	Tenm4-207	0	Tenm4-201;Tenm4-203;Tenm4-202;Tenm4-207	Tenm4;Tenm4;Tenm4;Tenm4	0;0;0;0	TRUE	FALSE	TRUE	FALSE	FALSE	TRUE	TRUE	FALSE	FALSE	Exon	17	26	23966	ENSMUSG00000048078	conserved gene but different region
cg01245471	NA	NA	NA	NA	0.394266218	NA	Evx1	Evx1_Exon	6	52314194	52314243	52314194	52314195	50	-	CGGATTTCTATGAAGAAATCGAGGTGAGCTGCACCCCGGACTGCGCCACC	Promoter (<=1kb)	6	52313498	52318378	4881	1	Evx1-201	696	Evx1-201;Evx1-202	Evx1;Evx1	0;0	TRUE	FALSE	TRUE	FALSE	FALSE	TRUE	TRUE	FALSE	FALSE	Exon	4	19	14028	ENSMUSG00000005503	mapped to different genes	6	52314189	52314303	115	*	115	10
cg01284284	NA	NA	NA	NA	0.555114997	NA	Prdm16	Prdm16_Intron	4	154630625	154630674	154630673	154630674	50	-	TTGTAGTTAATGAAATTAAACACACCAATCGCATTTGTCCCCAGGGGACG	Intron (Prdm16-201/Prdm16, intron 1 of 16)	4	154316125	154636866	320742	2	Prdm16-201	6192	Prdm16-201;Prdm16-202;Prdm16-203;Prdm16-204;Prdm16-205;Prdm16-206;Prdm16-210;Prdm16-207;Prdm16-212	Prdm16;Prdm16;Prdm16;Prdm16;Prdm16;Prdm16;Prdm16;Prdm16;Prdm16	0;0;0;0;0;0;0;0;0	TRUE	FALSE	FALSE	FALSE	FALSE	FALSE	TRUE	FALSE	FALSE	Intron	26	32	70673	ENSMUSG00000039410	conserved gene and region
cg01290613	0.002422057	NA	NA	NA	NA	NA	Pou2f2	Pou2f2_Promoter	7	25179921	25179970	25179921	25179922	50	-	CGGCTCCCACCTTGTCCCCATGGCAACCCCGGGCCCAAGGATGCTCAGAG	Promoter (<=1kb)	7	25120618	25179726	59109	2	Pou2f2-208	-244	Pou2f2-208	Pou2f2	0	FALSE	TRUE	TRUE	FALSE	FALSE	FALSE	FALSE	FALSE	FALSE	Promoter	11	29	18987	ENSMUSG00000008496	conserved gene but different region	7	25179573	25180057	485	*	485	61
cg01309929	NA	0.056955259	NA	NA	NA	NA	Mink1	Mink1_Exon	11	70612726	70612775	70612726	70612727	50	-	CGGCTCAAGGTCATCTATGGCTCCAGTGCTGGCTTCCATGCTGTGGATGT	Exon (Mink1-201/Mink1, exon 30 of 33)	11	70562881	70614482	51602	1	Mink1-201	49845	4930544D05Rik-204;4930544D05Rik-201;4930544D05Rik-202;4930544D05Rik-203;Chrne-202;Chrne-201;Chrne-204;Chrne-203;Mink1-201;Mink1-202;Mink1-205;Mink1-203;Mink1-204;Mink1-208;Mink1-212;Mink1-211;Mink1-209;Mink1-206	4930544D05Rik;4930544D05Rik;4930544D05Rik;4930544D05Rik;Chrne;Chrne;Chrne;Chrne;Mink1;Mink1;Mink1;Mink1;Mink1;Mink1;Mink1;Mink1;Mink1;Mink1	-3073;-3119;-3122;-3135;6419;6441;2898;2922;0;0;0;0;0;0;0;0;2988;2675	TRUE	FALSE	FALSE	FALSE	FALSE	TRUE	TRUE	FALSE	FALSE	Exon	4	7	50932	ENSMUSG00000020827	conserved gene but different region
cg01337054	NA	NA	-0.025926518	NA	NA	NA	Zfp407	Zfp407_Intron	18	84372362	84372411	84372410	84372411	50	-	ATTAACGAGTGCCTTCTTTGAATTAGAAAAACTGTATCATTTAGCCCACG	Intron (Zfp407-201/Zfp407, intron 2 of 2)	18	84128027	84558425	430399	2	Zfp407-201	186014	Zfp407-201;Zfp407-202;Zfp407-203	Zfp407;Zfp407;Zfp407	0;0;0	TRUE	FALSE	FALSE	FALSE	FALSE	FALSE	TRUE	FALSE	FALSE	Intron	31	32	240476	ENSMUSG00000048410	conserved gene and region
cg01352789	NA	NA	NA	NA	-1.193701944	NA	Nol4	Nol4_Exon	18	23039969	23040018	23040017	23040018	50	-	GTCTTGCCTGAGTCCCCGTAAGTCCTGAGGCACCAGTCCTGGAACTGGCG	Exon (Nol4-204/Nol4, exon 1 of 10)	18	22693634	23041653	348020	2	Nol4-204	1635	Nol4-202;Nol4-204;Nol4-208;Nol4-206;Nol4-209	Nol4;Nol4;Nol4;Nol4;Nol4	0;0;0;0;0	TRUE	FALSE	FALSE	FALSE	FALSE	TRUE	FALSE	FALSE	FALSE	Exon	16	21	319211	ENSMUSG00000041923	conserved gene and region	18	23039723	23040174	452	*	452	35
cg01359371	-0.304523367	NA	NA	NA	NA	NA	Kctd7	Kctd7_Exon	5	130151755	130151804	130151803	130151804	50	-	CATCGGGCCCCTCCTGGAGCAGCTGGAGAACATGCAGCCACTGAAGGGCG	Exon (Kctd7-201/Kctd7, exon 3 of 4)	5	130144861	130155806	10946	1	Kctd7-201	6894	Kctd7-201;Kctd7-203;Kctd7-202	Kctd7;Kctd7;Kctd7	0;6831;0	TRUE	FALSE	FALSE	FALSE	FALSE	TRUE	FALSE	TRUE	FALSE	Exon	2	2	212919	ENSMUSG00000034110	conserved gene and region
cg01385439	NA	-0.143621398	NA	NA	NA	NA	Irx3	Irx3_Exon	8	91872552	91872601	91872600	91872601	50	-	CTTTACCATTAATTTAACTTTCAGATGCTGAAATTGGTCACACAGCCTCG	Exon (Gm28511-201/Gm28511-201, exon 2 of 2)	8	91798525	91802067	3543	2	Irx3-202	-70534	NA	NA	NA	TRUE	FALSE	FALSE	FALSE	FALSE	TRUE	TRUE	FALSE	FALSE	Exon	16	36	16373	ENSMUSG00000031734	mapped to different genes
cg01433318	NA	NA	0.05818632	NA	NA	NA	Tle4	Tle4_Intron	19	14566785	14566834	14566833	14566834	50	-	CACACACTTCTAATGGCCTATGTTTTGAAACTGAGTCTAATATAATGGCG	Intron (Tle4-201/Tle4, intron 4 of 19)	19	14448150	14598051	149902	2	Tle4-201	31217	Tle4-201;Tle4-202;Tle4-203	Tle4;Tle4;Tle4	0;0;0	TRUE	FALSE	FALSE	FALSE	FALSE	FALSE	TRUE	FALSE	FALSE	Intron	12	29	21888	ENSMUSG00000024642	conserved gene and region
cg01450059	NA	NA	-0.011961946	NA	NA	NA	Zfp521	Zfp521_Intron	18	13765184	13765233	13765184	13765185	50	+	CGTGGGAATTTAGCTAAAACTGTTAAAACTGACACCATTGGCTTTTGTTA	Intron (Zfp521-201/Zfp521, intron 5 of 7)	18	13687013	13972787	285775	2	Zfp521-201	207554	Zfp521-201;Zfp521-205;Zfp521-204	Zfp521;Zfp521;Zfp521	0;0;0	TRUE	FALSE	FALSE	FALSE	FALSE	FALSE	TRUE	FALSE	FALSE	Intron	65	81	225207	ENSMUSG00000024420	conserved gene and region
cg01513560	NA	0.115362436	NA	NA	NA	NA	Arhgap15	Arhgap15_Intron	2	44341443	44341492	44341491	44341492	50	+	TGTGACGGCTAGAACAGGGCCAGCTCTGGACGGCACATGTTCAAGTGACG	Intron (Arhgap15-203/Arhgap15, intron 13 of 14)	2	43748824	44395953	647130	1	Arhgap15-203	592619	Arhgap15-203;Arhgap15-202;Arhgap15-201	Arhgap15;Arhgap15;Arhgap15	0;0;0	TRUE	FALSE	FALSE	FALSE	FALSE	FALSE	TRUE	FALSE	FALSE	Intron	72	78	76117	ENSMUSG00000049744	conserved gene and region
cg01522553	NA	NA	0.319784017	NA	NA	NA	Kcnc4	Kcnc4_threeUTR	3	107439392	107439441	107439392	107439393	50	-	CGAGAGGGCGTCTTGGCAGGTCTCTGTGTTTAAAGAGCACAGGTGTGAGA	3' UTR	3	107438303	107459552	21250	2	Kcnc4-201	20111	Kcnc4-201;Kcnc4-202	Kcnc4;Kcnc4	0;0	TRUE	FALSE	FALSE	FALSE	TRUE	TRUE	FALSE	FALSE	FALSE	threeUTR	3	12	99738	ENSMUSG00000027895	conserved gene and region
cg01537787	-0.012055369	NA	NA	NA	NA	NA	Onecut2	Onecut2_fiveUTR	18	64340362	64340411	64340362	64340363	50	+	CGGGCCCTGATGGACTGAATGAAGGCTGCCTACACCGCCTATCGATGCCT	Promoter (<=1kb)	18	64340020	64400987	60968	1	Onecut2-201	342	Onecut2-201	Onecut2	0	TRUE	FALSE	TRUE	TRUE	FALSE	TRUE	FALSE	FALSE	FALSE	fiveUTR	2	19	225631	ENSMUSG00000045991	conserved gene and region	18	64339929	64340544	616	*	616	67
cg01566077	-0.238227254	NA	NA	NA	NA	NA	Mettl3	Mettl3_threeUTR	14	52297591	52297640	52297639	52297640	50	+	TCAGCCATCACAACTGCAAACTTGCCCAAGATACTGACGTCCAGGTAGCG	3' UTR	14	52294841	52305128	10288	2	Mettl3-201	7488	Mettl3-201;Mettl3-212;Mettl3-209;Mettl3-213;Mettl3-210;Mettl3-206;Mettl3-204;Mettl3-207;Mettl3-203;Mettl3-202;Mettl3-211;Mettl3-208;Mettl3-214;Mettl3-205;Tox4-201	Mettl3;Mettl3;Mettl3;Mettl3;Mettl3;Mettl3;Mettl3;Mettl3;Mettl3;Mettl3;Mettl3;Mettl3;Mettl3;Mettl3;Tox4	0;0;-922;0;0;0;0;0;0;0;0;7347;7467;7459;0	TRUE	FALSE	FALSE	FALSE	TRUE	TRUE	TRUE	FALSE	FALSE	threeUTR	3	3	56335	ENSMUSG00000022160	conserved gene and region
cg01574836	-0.239944711	NA	-0.081177315	NA	NA	NA	Malsu1	Malsu1_Exon	6	49075111	49075160	49075111	49075112	50	-	CGATATGATGGTTTCACTTCTGAGGCAAGAAAATGCAAGAGACATTTGTG	Exon (Malsu1-203/Malsu1, exon 2 of 4)	6	49073795	49086751	12957	1	Malsu1-203	1316	Gm19253-201;Gpnmb-203;Malsu1-203;Malsu1-202;Malsu1-201;Malsu1-205	Gm19253;Gpnmb;Malsu1;Malsu1;Malsu1;Malsu1	3481;38434;0;0;0;0	TRUE	FALSE	FALSE	FALSE	FALSE	TRUE	TRUE	FALSE	FALSE	Exon	1	1	75593	ENSMUSG00000029815	conserved gene and region
cg01594275	0.612883788	NA	NA	NA	NA	NA	Ep300	Ep300_Intron	15	81633853	81633902	81633901	81633902	50	-	TGCATCATTGAATGTCCTTGTCGCCGTTGATGACCTGCTCTCTGCTCCCG	Intron (Ep300-201/Ep300, intron 19 of 30)	15	81585397	81652077	66681	1	Ep300-201	48456	Ep300-201;Ep300-207;Ep300-204	Ep300;Ep300;Ep300	0;0;-2246	TRUE	FALSE	FALSE	FALSE	FALSE	FALSE	TRUE	FALSE	FALSE	Intron	1	7	328572	ENSMUSG00000055024	conserved gene and region
cg01667686	0.097859942	NA	NA	NA	NA	NA	Ncor1	Ncor1_Exon	11	62333728	62333777	62333728	62333729	50	-	CGGGTGATGATCACGTCTATGAAGTTAGCTGCAGTAATGGTAGTCTTCCC	Exon (Ncor1-204/Ncor1, exon 36 of 45)	11	62316426	62438515	122090	2	Ncor1-204	104738	Gm12276-201;Ncor1-204;Ncor1-201;Ncor1-213;Ncor1-214;Ncor1-202;Ncor1-205;Ncor1-209;Ncor1-223;Ncor1-219	Gm12276;Ncor1;Ncor1;Ncor1;Ncor1;Ncor1;Ncor1;Ncor1;Ncor1;Ncor1	2307;0;0;0;0;0;0;0;0;-2785	TRUE	FALSE	FALSE	FALSE	FALSE	TRUE	FALSE	FALSE	FALSE	Exon	8	10	20185	ENSMUSG00000018501	conserved gene and region
cg01675972	-0.156909882	NA	NA	NA	NA	NA	Kpna1	Kpna1_threeUTR	16	36015922	36015971	36015922	36015923	50	-	CGGCAAAGTGGCCAGCAACAGAGTCCTGATCCAAATGGAGAAAGGGAACC	3' UTR	16	35983315	36037131	53817	1	Kpna1-201	32607	Kpna1-201;Kpna1-209;Kpna1-205;Kpna1-207;Kpna1-210;Kpna1-202;Kpna1-206	Kpna1;Kpna1;Kpna1;Kpna1;Kpna1;Kpna1;Kpna1	0;0;0;0;0;0;0	TRUE	FALSE	FALSE	FALSE	TRUE	TRUE	TRUE	FALSE	FALSE	threeUTR	3	5	16646	ENSMUSG00000022905	conserved gene but different region
cg01689963	NA	NA	NA	NA	0.511924531	NA	Sox21	Sox21_Exon	14	118212479	118212528	118212479	118212480	50	+	CGCTTGGACTTTATCCTGGTGGTAATGAAGAGATAATGAAGATTTTTAAT	Exon (4933431J24Rik-201/4933431J24Rik-201, exon 1 of 2)	14	118233232	118237030	3799	2	Sox21-201	24502	NA	NA	NA	TRUE	FALSE	FALSE	FALSE	FALSE	TRUE	TRUE	FALSE	FALSE	Exon	1	27	223227	ENSMUSG00000061517	mapped to different genes
cg01703108	NA	NA	NA	NA	0.743633577	0.443840041	Epha3	Epha3_Exon	16	63653410	63653459	63653458	63653459	50	-	CAAAACTACTCACGGGTACAAGCCATGGATGGAGGGTCTTTGTCTGCCCG	Exon (Epha3-201/Epha3, exon 4 of 17)	16	63543534	63864158	320625	2	Epha3-201	210699	Epha3-201;Epha3-203;Epha3-206;Epha3-205	Epha3;Epha3;Epha3;Epha3	0;0;0;0	TRUE	FALSE	FALSE	FALSE	FALSE	TRUE	TRUE	FALSE	FALSE	Exon	2	8	13837	ENSMUSG00000052504	conserved gene and region
cg01710150	NA	NA	-0.069954849	NA	NA	NA	Nrp2	Nrp2_Intron	1	62704529	62704578	62704529	62704530	50	+	CGGTGTTCATATGTCACATATGGACTGAATCAAAGGTTTAAAAATACTAC	Intron (Nrp2-207/Nrp2, intron 1 of 2)	1	62703285	62739932	36648	1	Nrp2-207	1244	Nrp2-207;Nrp2-203;Nrp2-204;Nrp2-201;Nrp2-205;Nrp2-202;Nrp2-206	Nrp2;Nrp2;Nrp2;Nrp2;Nrp2;Nrp2;Nrp2	0;0;0;0;0;0;0	TRUE	FALSE	FALSE	FALSE	FALSE	FALSE	TRUE	FALSE	FALSE	Intron	2	6	18187	ENSMUSG00000025969	conserved gene and region
cg01712842	NA	NA	0.350402357	NA	0.862863209	NA	Neurog2	Neurog2_Promoter	3	127625765	127625814	127625813	127625814	50	-	TAGAACTCAACAGGAGTAAAACTAAATCCTCGTTTAAGTGTATTTATCCG	Promoter (7-8kb)	3	127633135	127635631	2497	1	Neurog2-201	-7370	NA	NA	NA	FALSE	TRUE	TRUE	FALSE	FALSE	FALSE	FALSE	FALSE	FALSE	Promoter	13	14	11924	ENSMUSG00000027967	mapped to different genes
cg01727347	NA	NA	NA	-0.28462984	NA	NA	Cdk12	Cdk12_Intergenic_downstream	11	98290098	98290147	98290146	98290147	50	+	GAGGCGTTCCTGCCAAATCCATCCCAACATCTTGGCCTGGCATCAGGGCG	Distal Intergenic	11	98263502	98268011	4510	1	Cdk12-204	26596	NA	NA	NA	FALSE	TRUE	FALSE	FALSE	FALSE	FALSE	FALSE	FALSE	TRUE	Intergenic_downstream	17	25	69131	ENSMUSG00000003119	mapped to different genes
cg01739251	0.071594575	NA	NA	NA	NA	NA	Tal1	Tal1_Promoter	4	115056612	115056661	115056660	115056661	50	+	TGCCAAATTAAAATGAATCATTTGGCCCATAATGGCCGAGGCGCTTATCG	Promoter (<=1kb)	4	115056426	115071755	15330	1	Tal1-201	186	Tal1-201;Tal1-202;Tal1-203;Tal1-204	Tal1;Tal1;Tal1;Tal1	0;0;-1150;-2847	TRUE	FALSE	TRUE	FALSE	FALSE	FALSE	TRUE	FALSE	FALSE	Promoter	3	4	21349	ENSMUSG00000028717	conserved gene and region	4	115056648	115057443	796	*	796	76
cg01751209	NA	NA	NA	NA	-0.101982263	NA	Ap3b1	Ap3b1_Intergenic_downstream	13	94576082	94576131	94576082	94576083	50	+	CGGCAGCCGGTCCCATTGTTTGCCCTTGATGAGCATGTCATTAATGGAAA	Distal Intergenic	13	94542303	94547867	5565	1	Ap3b1-202	33779	NA	NA	NA	FALSE	TRUE	FALSE	FALSE	FALSE	FALSE	FALSE	FALSE	TRUE	Intergenic_downstream	33	55	11774	ENSMUSG00000021686	conserved gene and region
cg01766000	NA	NA	NA	NA	0.994131718	NA	Tfap2a	Tfap2a_Intergenic_downstream	13	40709134	40709183	40709182	40709183	50	+	ATCCATGGACACTCGAGCAATTATGCCTCCACGCTGAAGGTGGATTAGCG	Distal Intergenic	13	40716724	40728944	12221	2	Tfap2a-209	19761	NA	NA	NA	FALSE	TRUE	FALSE	FALSE	FALSE	FALSE	FALSE	FALSE	TRUE	Intergenic_downstream	15	57	21418	ENSMUSG00000021359	mapped to different genes	13	40709088	40709361	274	*	274	22
cg01831882	NA	NA	NA	NA	-1.09739692	NA	Foxg1	Foxg1_Exon	12	49385346	49385395	49385346	49385347	50	+	CGGCCTCACCTTCATGGACCGCGCCGGCTCCCTCTACTGGCCCATGTCGC	Exon (Foxg1-204/Foxg1, exon 1 of 1)	12	49382883	49386855	3973	1	Foxg1-204	2463	Foxg1-202;Foxg1-203;Foxg1-204;Foxg1-201;Gm43517-201	Foxg1;Foxg1;Foxg1;Foxg1;Gm43517	0;2546;0;0;0	TRUE	FALSE	FALSE	FALSE	FALSE	TRUE	FALSE	FALSE	FALSE	Exon	8	27	15228	ENSMUSG00000020950	conserved gene and region	12	49385116	49385808	693	*	693	72
cg01851187	-0.536825631	NA	NA	NA	-2.094237207	-1.010792527	Mitf	Mitf_Intergenic_downstream	6	98106261	98106310	98106309	98106310	50	+	AAAAGAGGTCACTGGTCTTTCCTTTAATTTCTGTCACAGGCTGCAGGCCG	Distal Intergenic	6	97991921	98018175	26255	1	Mitf-208	114340	NA	NA	NA	FALSE	TRUE	FALSE	FALSE	FALSE	FALSE	FALSE	FALSE	TRUE	Intergenic_downstream	4	16	17342	ENSMUSG00000035158	mapped to different genes
cg01852109	NA	NA	NA	NA	-0.254414817	NA	Igdcc4	Igdcc4_Exon	9	65124671	65124720	65124671	65124672	50	-	CGGGACCTGGAACCCAACACAGATTATGAGTTCTACGTGGTGGCCTACTC	Exon (Igdcc4-201/Igdcc4, exon 8 of 20)	9	65101486	65137940	36455	1	Igdcc4-201	23185	Igdcc4-201;Igdcc4-202;Igdcc4-205;Igdcc4-204;Igdcc4-206;Igdcc4-203	Igdcc4;Igdcc4;Igdcc4;Igdcc4;Igdcc4;Igdcc4	0;0;0;0;0;0	TRUE	FALSE	FALSE	FALSE	FALSE	TRUE	TRUE	FALSE	FALSE	Exon	1	1	56741	ENSMUSG00000032816	conserved gene and region
cg01902998	-0.100121683	NA	NA	NA	NA	NA	Sptb	Sptb_fiveUTR	12	76710049	76710098	76710049	76710050	50	-	CGCGGACCCGCCCAGAGATATAAATAACATTATCTGAGGAGGGACATTCC	Promoter (<=1kb)	12	76580488	76710547	130060	2	Sptb-201	449	Sptb-201;Sptb-202	Sptb;Sptb	0;0	TRUE	FALSE	TRUE	TRUE	FALSE	TRUE	FALSE	FALSE	FALSE	fiveUTR	4	6	20741	ENSMUSG00000021061	conserved gene but different region	12	76709477	76710058	582	*	582	58
cg01932632	-0.476704466	NA	NA	NA	NA	NA	Spire1	Spire1_Exon	18	67610574	67610623	67610574	67610575	50	+	CGCCTGCTCCTCGTTGATGGGCTGGTTGTACAGCCGCAGGATCTCCTCCA	Promoter (<=1kb)	18	67488209	67610790	122582	2	Spire1-203	167	Spire1-203	Spire1	0	TRUE	FALSE	TRUE	FALSE	FALSE	TRUE	FALSE	FALSE	FALSE	Exon	2	2	68166	ENSMUSG00000024533	conserved gene and region	18	67610213	67611300	1088	*	1088	156
cg01933636	NA	NA	NA	0.782111717	NA	NA	Fbxw4	Fbxw4_Intron	19	45628832	45628881	45628880	45628881	50	-	GGTTAGCCGACACCTCTGCTCTGTGGAATTTTAATTAACTTCTCTCATCG	Intron (Fbxw4-206/Fbxw4, intron 1 of 4)	19	45578254	45631138	52885	2	Fbxw4-206	2257	Fbxw4-206;Fbxw4-201;Fbxw4-208;Fbxw4-202	Fbxw4;Fbxw4;Fbxw4;Fbxw4	0;0;0;0	TRUE	FALSE	FALSE	FALSE	FALSE	FALSE	TRUE	FALSE	FALSE	Intron	12	14	30838	ENSMUSG00000040913	conserved gene and region
cg01975510	0.286087436	NA	NA	NA	NA	NA	Kdm2a	Kdm2a_Exon	19	4324733	4324782	4324781	4324782	50	-	TCAACTTCAGACAGCTCCTTTTTGCCGCTGGGATTGTTCTCCTTTTCCCG	Exon (Kdm2a-201/Kdm2a, exon 17 of 21)	19	4314419	4398285	83867	2	Kdm2a-201	73503	Kdm2a-201;Kdm2a-202;Kdm2a-213;Kdm2a-211;Kdm2a-207;Kdm2a-214;Kdm2a-212;Kdm2a-210	Kdm2a;Kdm2a;Kdm2a;Kdm2a;Kdm2a;Kdm2a;Kdm2a;Kdm2a	0;0;0;0;0;0;0;0	TRUE	FALSE	FALSE	FALSE	FALSE	TRUE	TRUE	FALSE	FALSE	Exon	21	30	225876	ENSMUSG00000054611	conserved gene and region	19	4324711	4324995	285	*	285	19
cg01986981	NA	NA	NA	0.313587347	NA	NA	Antxr2	Antxr2_Intron	5	97935178	97935227	97935226	97935227	50	-	CCTGCTGTCCCCTGTCACTCCCTGGAAACTTGGCGGCAGATGTTGCAGCG	Intron (Antxr2-201/Antxr2, intron 16 of 16)	5	97882783	98030962	148180	2	Antxr2-201	95735	Antxr2-201;Antxr2-202	Antxr2;Antxr2	0;0	TRUE	FALSE	FALSE	FALSE	FALSE	FALSE	TRUE	FALSE	FALSE	Intron	3	4	71914	ENSMUSG00000029338	conserved gene and region
cg02040024	0.365397294	NA	NA	0.106572901	NA	NA	Egr3	Egr3_Exon	14	70078960	70079009	70079008	70079009	50	+	CTTCCAGCCAGCCCCCGGCAACAAGACCGTGACCTACTTGGGAAAGTTCG	Exon (Egr3-201/Egr3, exon 3 of 3)	14	70077203	70079955	2753	1	Egr3-201	1757	Egr3-201;Egr3-204;Egr3-203;Egr3-202	Egr3;Egr3;Egr3;Egr3	0;0;0;0	TRUE	FALSE	FALSE	FALSE	FALSE	TRUE	FALSE	FALSE	FALSE	Exon	4	19	13655	ENSMUSG00000033730	conserved gene but different region	14	70078306	70079015	710	*	710	70
cg02077300	NA	NA	NA	NA	NA	0.663496401	Gm2505	Gm2505_Intergenic_upstream	3	143655405	143655454	143655453	143655454	50	-	GGCAGGAATTCTACAATCACTTATTAAATTGGCCTCCTAAATCCTGAGCG	Distal Intergenic	3	143872995	143873819	825	1	Gm2505-201	-217590	NA	NA	NA	FALSE	TRUE	FALSE	FALSE	FALSE	FALSE	FALSE	FALSE	TRUE	Intergenic_upstream	11	37	100039938	NA	mapped to different genes
cg02129856	NA	NA	NA	NA	0.157544922	NA	Gbx2	Gbx2_Intergenic_upstream	1	89941544	89941593	89941592	89941593	50	+	GAATTTAATTGCCGAGCCATTAGACAAATAGTATATTTGCCATTCCCGCG	Distal Intergenic	1	89927956	89931179	3224	2	Gbx2-201	-10365	NA	NA	NA	FALSE	TRUE	FALSE	FALSE	FALSE	FALSE	FALSE	FALSE	TRUE	Intergenic_upstream	4	13	14472	ENSMUSG00000034486	conserved gene but different region	1	89941556	89941680	125	*	125	14
cg02169296	NA	NA	-0.338091773	NA	NA	NA	Tspan5	Tspan5_fiveUTR	3	138742551	138742600	138742551	138742552	50	-	CGGGGCAAGTGTCTTCATGAACCCAGAGGATGTCCGGGAAGCACTACAAG	Promoter (<=1kb)	3	138742195	138907905	165711	1	Tspan5-201	356	Tspan5-201;Tspan5-207;Tspan5-204;Tspan5-209	Tspan5;Tspan5;Tspan5;Tspan5	0;0;0;-169	TRUE	FALSE	TRUE	TRUE	FALSE	TRUE	FALSE	FALSE	FALSE	fiveUTR	1	2	56224	ENSMUSG00000028152	conserved gene and region	3	138741870	138742586	717	*	717	97
cg02188840	NA	NA	NA	NA	-1.550671856	NA	Tnrc6c	Tnrc6c_Exon	11	117736003	117736052	117736051	117736052	50	+	CCTGGATCATGAGCCGGCTGATCAAACAACTCACAGACATGGGCTTCCCG	Exon (Tnrc6c-201/Tnrc6c, exon 8 of 22)	11	117654289	117763437	109149	1	Tnrc6c-201	81714	Tnrc6c-201;Tnrc6c-205;Tnrc6c-202;Tnrc6c-203	Tnrc6c;Tnrc6c;Tnrc6c;Tnrc6c	0;0;0;0	TRUE	FALSE	FALSE	FALSE	FALSE	TRUE	FALSE	FALSE	FALSE	Exon	5	5	217351	ENSMUSG00000025571	conserved gene and region
cg02190183	-0.00215638	NA	NA	NA	NA	NA	Zfhx3	Zfhx3_fiveUTR	8	108714824	108714873	108714872	108714873	50	-	TTAACCTTCCGCTTTGTTGCTGTGTAATGTGGATCCCCGAAGGCCCCCCG	5' UTR	8	107942644	108961630	1018987	1	Zfhx3-204	772180	Zfhx3-204;Zfhx3-202;Zfhx3-201	Zfhx3;Zfhx3;Zfhx3	0;0;0	TRUE	FALSE	FALSE	TRUE	FALSE	TRUE	TRUE	FALSE	FALSE	fiveUTR	11	177	11906	ENSMUSG00000038872	conserved gene but different region	8	108714612	108715434	823	*	823	88
cg02205352	NA	NA	-0.88967758	NA	NA	NA	Pura	Pura_Exon	18	36287815	36287864	36287815	36287816	50	+	CGAGGGCACCTCCTTGACTGTGGACAACAAGCGCTTCTTCTTCGATGTGG	Exon (Pura-201/Pura, exon 2 of 2)	18	36281097	36292535	11439	1	Pura-201	6718	Pura-201	Pura	0	TRUE	FALSE	FALSE	FALSE	FALSE	TRUE	FALSE	FALSE	FALSE	Exon	13	19	19290	ENSMUSG00000043991	conserved gene and region	18	36286687	36288029	1343	*	1343	129
cg02216125	2.85413722	NA	NA	NA	NA	NA	Eif4g2	Eif4g2_Exon	7	111077259	111077308	111077307	111077308	50	+	TTTGGTCCATTGTCAAGAAAAGCCTTGCGAGGAACCCAATGGTGTTCTCG	Exon (Eif4g2-213/Eif4g2, exon 11 of 22)	7	111067750	111083030	15281	2	Eif4g2-213	5722	Eif4g2-213;Eif4g2-206;Eif4g2-207;Eif4g2-208;Eif4g2-214;Eif4g2-202;Eif4g2-204;Eif4g2-211;Eif4g2-210;Eif4g2-209;Eif4g2-203;Eif4g2-201;Eif4g2-212;Eif4g2-205	Eif4g2;Eif4g2;Eif4g2;Eif4g2;Eif4g2;Eif4g2;Eif4g2;Eif4g2;Eif4g2;Eif4g2;Eif4g2;Eif4g2;Eif4g2;Eif4g2	0;0;0;0;-3010;-2560;-1874;-1050;0;0;0;0;0;0	TRUE	FALSE	FALSE	FALSE	FALSE	TRUE	FALSE	FALSE	FALSE	Exon	20	22	13690	ENSMUSG00000005610	conserved gene and region
cg02282892	NA	NA	0.009553264	NA	NA	NA	C1qtnf3	C1qtnf3_Exon	15	10952659	10952708	10952707	10952708	50	+	ATAATAACACTTCTACAGACCTAAAATCCCTGAGACCAGATGAGCTACCG	Promoter (<=1kb)	15	10952332	10980150	27819	1	C1qtnf3-201	327	C1qtnf3-201;C1qtnf3-202	C1qtnf3;C1qtnf3	0;0	TRUE	FALSE	TRUE	FALSE	FALSE	TRUE	TRUE	FALSE	FALSE	Exon	1	1	81799	ENSMUSG00000058914	conserved gene and region
cg02285637	NA	NA	NA	NA	-0.151166705	NA	Lyl1	Lyl1_threeUTR	8	84704907	84704956	84704955	84704956	50	-	AAACAGACAGTAAACTACCCTTGTTTCTTATGTATCTCAGTGCAGAGACG	3' UTR	8	84701482	84704940	3459	1	Lyl1-204	3425	Lyl1-203;Lyl1-204;Lyl1-201;Lyl1-202;Nfix-207;Nfix-208;Nfix-204;Nfix-201;Nfix-202;Nfix-203;Nfix-206	Lyl1;Lyl1;Lyl1;Lyl1;Nfix;Nfix;Nfix;Nfix;Nfix;Nfix;Nfix	3458;0;3363;3126;0;0;0;0;0;0;0	TRUE	FALSE	FALSE	FALSE	TRUE	TRUE	TRUE	TRUE	FALSE	threeUTR	2	2	17095	ENSMUSG00000034041	mapped to different genes
cg02339457	NA	-0.157693089	NA	NA	NA	NA	Dmrt1	Dmrt1_Intron	19	25602205	25602254	25602253	25602254	50	-	CATTAGTATTAACGATTGGCCATTTGGAATTGGTGACAAACTACTGCCCG	Intron (Dmrt1-201/Dmrt1, intron 4 of 4)	19	25505618	25604329	98712	1	Dmrt1-201	96587	Dmrt1-201;Dmrt1-202	Dmrt1;Dmrt1	0;0	TRUE	FALSE	FALSE	FALSE	FALSE	FALSE	TRUE	FALSE	FALSE	Intron	9	9	50796	ENSMUSG00000024837	conserved gene and region
cg02486904	NA	NA	NA	NA	-0.655495636	NA	Gm12830	Gm12830_Exon	4	114821860	114821909	114821908	114821909	50	+	AGAAAGTAAAAACACAGCTGACTCCCATTAGGGCCCTCTCACAGGCTCCG	Promoter (<=1kb)	4	114821722	114856166	34445	1	Gm12830-201	138	Gm12830-201	Gm12830	0	TRUE	FALSE	TRUE	FALSE	FALSE	TRUE	TRUE	FALSE	FALSE	Exon	5	26	433746	ENSMUSG00000055198	mapped to different genes	4	114821908	114822167	260	*	260	26
cg02533268	NA	NA	NA	NA	-1.435646763	NA	Foxg1	Foxg1_Exon	12	49385330	49385379	49385330	49385331	50	+	CGCGCCTCACCTCCACCGGCCTCACCTTCATGGACCGCGCCGGCTCCCTC	Exon (Foxg1-204/Foxg1, exon 1 of 1)	12	49382883	49386855	3973	1	Foxg1-204	2447	Foxg1-202;Foxg1-203;Foxg1-204;Foxg1-201;Gm43517-201	Foxg1;Foxg1;Foxg1;Foxg1;Gm43517	0;2530;0;0;0	TRUE	FALSE	FALSE	FALSE	FALSE	TRUE	FALSE	FALSE	FALSE	Exon	8	27	15228	ENSMUSG00000020950	conserved gene and region	12	49385116	49385808	693	*	693	72
cg02546724	NA	NA	NA	NA	0.378942739	NA	Gbx2	Gbx2_Intergenic_upstream	1	89941560	89941609	89941608	89941609	50	+	CCATTAGACAAATAGTATATTTGCCATTCCCGCGTTATCCATCATTTTCG	Distal Intergenic	1	89927956	89931179	3224	2	Gbx2-201	-10381	NA	NA	NA	FALSE	TRUE	FALSE	FALSE	FALSE	FALSE	FALSE	FALSE	TRUE	Intergenic_upstream	4	13	14472	ENSMUSG00000034486	conserved gene but different region	1	89941556	89941680	125	*	125	14
cg02572855	0.007809233	NA	NA	NA	NA	NA	Gm44533	Gm44533_Intergenic_downstream	7	69336431	69336480	69336479	69336480	50	-	AGATAAATAGCAGAGTGTCCTCCTCAAAAATATGATTAATACCCTACTCG	Distal Intergenic	7	69259595	69259862	268	1	Gm44533-201	76885	NA	NA	NA	FALSE	TRUE	FALSE	FALSE	FALSE	FALSE	FALSE	FALSE	TRUE	Intergenic_downstream	2	2	NA	NA	mapped to different genes
cg02601407	NA	NA	NA	NA	-1.864409556	NA	Rev3l	Rev3l_fiveUTR	10	39732129	39732178	39732177	39732178	50	+	CATGGCAACAAGAGCTGCAGCCTGGGACCGAGGAGCCCGTGTGATTCCCG	Promoter (<=1kb)	10	39732118	39875211	143094	1	Rev3l-201	11	Rev3l-201;Rev3l-204;Rev3l-207	Rev3l;Rev3l;Rev3l	0;0;0	TRUE	FALSE	TRUE	TRUE	FALSE	TRUE	FALSE	FALSE	FALSE	fiveUTR	2	7	19714	ENSMUSG00000019841	conserved gene and region	10	39732157	39733134	978	*	978	126
cg02604675	NA	-0.563887102	NA	NA	NA	NA	Helt	Helt_Promoter	8	46295363	46295412	46295363	46295364	50	-	CGGTAAATGTCATTAGAAAGGGAGAAACAATCGCGCTTAGAGGGCTCTGA	Promoter (<=1kb)	8	46292039	46294671	2633	2	Helt-201	-741	Helt-201;Helt-202;Helt-203	Helt;Helt;Helt	0;-1374;-2028	FALSE	TRUE	TRUE	FALSE	FALSE	FALSE	FALSE	FALSE	FALSE	Promoter	15	22	234219	ENSMUSG00000047171	conserved gene and region
cg02615877	NA	NA	NA	NA	-1.062936007	-1.068736732	Msantd2	Msantd2_Promoter	9	37489995	37490044	37490043	37490044	50	+	TTTCCCAGATGGCCGCCAGCCCGTAGGTTTCCTGAGTTTGAAGTTGGGCG	Promoter (<=1kb)	9	37489021	37524150	35130	1	Msantd2-209	974	Msantd2-209;Msantd2-204;Msantd2-210;Msantd2-201;Msantd2-202;Msantd2-208;Msantd2-205;Msantd2-203;Msantd2-206	Msantd2;Msantd2;Msantd2;Msantd2;Msantd2;Msantd2;Msantd2;Msantd2;Msantd2	0;0;0;0;0;0;0;0;0	TRUE	FALSE	TRUE	FALSE	FALSE	FALSE	TRUE	FALSE	FALSE	Promoter	2	8	235184	ENSMUSG00000042138	conserved gene but different region	9	37489051	37490155	1105	*	1105	120
cg02622074	2.377308604	NA	NA	NA	NA	NA	Tfap2a	Tfap2a_Intron	13	40730615	40730664	40730615	40730616	50	-	CGCGCTGGGCAGCGTTCCTGGAGCCTCCTAATAGCAGATATTCATGACTA	Intron (Gm26688-201/Gm26688-201, intron 1 of 2)	13	40715675	40733823	18149	2	Tfap2a-202	3159	Tfap2a-201;Tfap2a-202;Tfap2a-205;Tfap2a-203;Tfap2a-209;Tfap2a-208;Tfap2a-206;Tfap2a-204;Tfap2a-207	Tfap2a;Tfap2a;Tfap2a;Tfap2a;Tfap2a;Tfap2a;Tfap2a;Tfap2a;Tfap2a	0;0;0;0;0;0;0;0;0	TRUE	FALSE	FALSE	FALSE	FALSE	FALSE	TRUE	FALSE	FALSE	Intron	17	57	21418	ENSMUSG00000021359	mapped to different genes	13	40730503	40730628	126	*	126	13
cg02683277	NA	NA	NA	NA	0.49262638	NA	Fgfr2	Fgfr2_Intron	7	131542589	131542638	131542637	131542638	50	+	CGCATTTAACTTGGATGACATTTTGATTTCATCATTAGCATCCGGCGCCG	Intron (Fgfr2-217/Fgfr2, intron 2 of 6)	7	130162451	133123350	2960900	2	Fgfr2-217	1580712	Fgfr2-217;Hmx3-201	Fgfr2;Hmx3	0;0	TRUE	FALSE	FALSE	FALSE	FALSE	FALSE	TRUE	FALSE	FALSE	Intron	58	79	14183	ENSMUSG00000030849	mapped to different genes
cg02692845	-0.038291715	NA	NA	NA	NA	NA	Sox2	Sox2_Exon	3	34651059	34651108	34651059	34651060	50	-	CGCAGACCTACATGAACGGCTCGCCCACCTACAGCATGTCCTACTCGCAG	Promoter (<=1kb)	3	34650405	34652461	2057	1	Sox2-201	654	Sox2-201	Sox2	0	TRUE	FALSE	TRUE	FALSE	FALSE	TRUE	TRUE	FALSE	FALSE	Exon	10	62	20674	ENSMUSG00000074637	mapped to different genes	3	34650151	34651388	1238	*	1238	126
cg02715589	NA	NA	0.014662275	NA	NA	NA	Wnt2b	Wnt2b_Intergenic_downstream	3	104943514	104943563	104943562	104943563	50	-	TGCTTACGGAGAACTCTGTGTCTGGCACCTCTCTCCACAAGGCCCAGGCG	Distal Intergenic	3	104960414	104961721	1308	2	Wnt2b-202	18207	Wnt2b-201	Wnt2b	0	FALSE	TRUE	FALSE	FALSE	FALSE	FALSE	FALSE	FALSE	TRUE	Intergenic_downstream	2	4	22414	ENSMUSG00000027840	mapped to different genes
cg02753151	0.475197658	NA	1.140181896	NA	NA	NA	Slc44a2	Slc44a2_Exon	9	21353023	21353072	21353023	21353024	50	+	CGGCTCTCAGGAGCGACCCTACTTCATGTCGCCCGAGCTGAGAGACATCC	Exon (Slc44a2-205/Slc44a2, exon 6 of 7)	9	21320698	21355028	34331	1	Slc44a2-210	32325	Slc44a2-210;Slc44a2-207;Slc44a2-201;Slc44a2-202;Slc44a2-209;Slc44a2-205;Slc44a2-203	Slc44a2;Slc44a2;Slc44a2;Slc44a2;Slc44a2;Slc44a2;Slc44a2	0;0;0;8141;6039;0;0	TRUE	FALSE	FALSE	FALSE	FALSE	TRUE	TRUE	FALSE	FALSE	Exon	3	3	68682	ENSMUSG00000057193	conserved gene and region
cg02758132	NA	0.540153863	NA	NA	NA	NA	Jag2	Jag2_Exon	12	112929028	112929077	112929028	112929029	50	-	CGTAGCTGCAGGGCCCCGTGGGCGTCACCTTGGCCTGGTACTCCTTAAGG	Promoter (<=1kb)	12	112907819	112929776	21958	2	Jag2-201	699	Jag2-201;Jag2-208	Jag2;Jag2	0;-580	TRUE	FALSE	TRUE	FALSE	FALSE	TRUE	FALSE	FALSE	FALSE	Exon	1	1	16450	ENSMUSG00000002799	conserved gene and region	12	112928401	112929996	1596	*	1596	249
cg02766229	NA	0.082905528	NA	NA	NA	NA	Casz1	Casz1_Intron	4	148908433	148908482	148908481	148908482	50	+	CAGGGTGACCTGTTTAATCATCTCATTTTCTGGTGGCCGTTTATTCCTCG	Intron (Casz1-201/Casz1, intron 4 of 15)	4	148804429	148945129	140701	1	Casz1-201	104004	Casz1-201;Casz1-202;Casz1-206	Casz1;Casz1;Casz1	0;0;0	TRUE	FALSE	FALSE	FALSE	FALSE	FALSE	TRUE	FALSE	FALSE	Intron	94	124	69743	ENSMUSG00000028977	mapped to different genes
cg02766818	0.18766594	0.735481183	NA	NA	NA	NA	A830031A19Rik	A830031A19Rik_Exon	11	24076516	24076565	24076564	24076565	50	+	GTAAAACTGAAAGTATCCCACGCCAGAGTGAAGCCCGCTTTTTGACAGCG	Promoter (1-2kb)	11	24048955	24075054	26100	2	A830031A19Rik-201	-1462	A830031A19Rik-201;Bcl11a-201;Bcl11a-203;Bcl11a-205;Bcl11a-202;Bcl11a-204	A830031A19Rik;Bcl11a;Bcl11a;Bcl11a;Bcl11a;Bcl11a	0;0;0;0;0;0	TRUE	FALSE	TRUE	FALSE	FALSE	TRUE	FALSE	FALSE	FALSE	Exon	1	23	268391	NA	mapped to different genes	11	24076381	24076583	203	*	203	22
cg02785457	NA	0.056713405	NA	NA	NA	NA	Tank	Tank_Intergenic_downstream	2	61656449	61656498	61656497	61656498	50	+	TAATTATCCGTCTCATTTGAGAAGAGCAGCATTTGAGGCAGCAGCGTTCG	Distal Intergenic	2	61643831	61649977	6147	1	Tank-211	12618	Tank-205;Tank-201;Tank-206;Tank-203;Tank-204;Tank-202;Tank-208	Tank;Tank;Tank;Tank;Tank;Tank;Tank	0;0;0;0;0;0;0	FALSE	TRUE	FALSE	FALSE	FALSE	FALSE	FALSE	FALSE	TRUE	Intergenic_downstream	16	17	21353	ENSMUSG00000064289	mapped to different genes	2	61656429	61656917	489	*	489	60
cg02793066	-0.162308264	NA	NA	NA	NA	NA	Vps11	Vps11_threeUTR	9	44356215	44356264	44356263	44356264	50	-	CTGGTGGCCTTGCCTCCAGTTTGGTCTGTGTGTCCTTCTCCTGCAGTGCG	3' UTR	9	44347749	44361670	13922	2	Vps11-201	5406	Vps11-201;Vps11-205;Vps11-206;Vps11-202;Vps11-203;Vps11-204	Vps11;Vps11;Vps11;Vps11;Vps11;Vps11	0;0;0;0;0;0	TRUE	FALSE	FALSE	FALSE	TRUE	TRUE	TRUE	FALSE	FALSE	threeUTR	2	2	71732	ENSMUSG00000032127	conserved gene but different region
cg02800363	-1.086183574	NA	NA	NA	NA	NA	Ahdc1	Ahdc1_Intron	4	133052204	133052253	133052252	133052253	50	+	GAACAAGGAGGCCAGAGCAGCTAATGGGAAACATGTGATTCTGCCTTGCG	Intron (Ahdc1-210/Ahdc1, intron 2 of 3)	4	133011260	133060820	49561	1	Ahdc1-210	40944	Ahdc1-210;Ahdc1-203;Ahdc1-204;Ahdc1-205;Ahdc1-207;Ahdc1-211;Ahdc1-209;Ahdc1-206;Ahdc1-201;Ahdc1-202	Ahdc1;Ahdc1;Ahdc1;Ahdc1;Ahdc1;Ahdc1;Ahdc1;Ahdc1;Ahdc1;Ahdc1	0;0;0;0;0;0;0;0;0;0	TRUE	FALSE	FALSE	FALSE	FALSE	FALSE	TRUE	FALSE	FALSE	Intron	35	49	230793	ENSMUSG00000037692	conserved gene and region
cg02808901	NA	NA	NA	NA	-0.945838207	NA	Hoxa11	Hoxa11_Exon	6	52246008	52246057	52246008	52246009	50	-	CGTCACTCGGTGTTCTCACCGAAAGCACGTAATCGCCGGTGTAACTCATG	Promoter (<=1kb)	6	52242106	52245810	3705	2	Hoxa11-201	-247	Hoxa11-201;Hoxa11-202	Hoxa11;Hoxa11	0;0	TRUE	FALSE	TRUE	FALSE	FALSE	TRUE	TRUE	FALSE	FALSE	Exon	15	18	15396	ENSMUSG00000038210	mapped to different genes	6	52246008	52246200	193	*	193	16
cg02815776	NA	NA	-0.472962962	NA	NA	NA	Tspan9	Tspan9_Exon	6	128034421	128034470	128034421	128034422	50	-	CGGCTTGGCAAAGTCCGAGTCCTTGCTGTCCAAAGATGGACTCCGATGGA	Exon (Tspan9-204/Tspan9, exon 1 of 5)	6	127961396	128143563	182168	2	Tspan9-203	109093	Tspan9-203;Tspan9-202;Tspan9-201;Tspan9-204;Tspan9-211;Tspan9-209;Tspan9-208;Tspan9-207;Tspan9-206	Tspan9;Tspan9;Tspan9;Tspan9;Tspan9;Tspan9;Tspan9;Tspan9;Tspan9	0;0;0;0;0;0;0;0;0	TRUE	FALSE	FALSE	FALSE	FALSE	TRUE	TRUE	FALSE	FALSE	Exon	4	8	109246	ENSMUSG00000030352	conserved gene and region	6	128034330	128034771	442	*	442	46
cg02818198	NA	NA	-0.37510097	NA	NA	NA	Dpf1	Dpf1_Exon	7	29309676	29309725	29309676	29309677	50	-	CGCCCGCTGTTGGAGGAAGAAACGGAGACTCAACATCCTGGAGGACCCCA	Exon (Dpf1-204/Dpf1, exon 3 of 12)	7	29303951	29317264	13314	1	Dpf1-204	5725	Dpf1-204;Dpf1-201;Dpf1-203;Dpf1-208;Dpf1-202;Dpf1-210;Dpf1-207;Dpf1-205;Dpf1-209;Dpf1-206	Dpf1;Dpf1;Dpf1;Dpf1;Dpf1;Dpf1;Dpf1;Dpf1;Dpf1;Dpf1	0;0;0;0;0;0;0;0;0;0	TRUE	FALSE	FALSE	FALSE	FALSE	TRUE	FALSE	FALSE	FALSE	Exon	3	4	29861	ENSMUSG00000030584	conserved gene and region
cg02873280	NA	NA	NA	NA	0.14436174	NA	Otp	Otp_Promoter	13	94872436	94872485	94872484	94872485	50	+	GTGATTTCTGAAGACATTCTTGTCATTCCGAAGATTTGGGGGCCATTGCG	Promoter (3-4kb)	13	94875602	94885130	9529	1	Otp-201	-3117	Otp-201	Otp	0	FALSE	TRUE	TRUE	FALSE	FALSE	FALSE	FALSE	FALSE	FALSE	Promoter	27	34	18420	ENSMUSG00000021685	conserved gene and region
cg02925207	0.120491132	NA	NA	NA	NA	NA	Sorbs2	Sorbs2_Exon	8	45783549	45783598	45783549	45783550	50	-	CGCATAAATCCAGATGACATAGATTTAGAAAATGAGCCCTGGTATAAATT	Exon (Sorbs2-201/Sorbs2, exon 14 of 26)	8	45507788	45827906	320119	1	Sorbs2-201	275761	Sorbs2-201;Sorbs2-218;Sorbs2-209;Sorbs2-202;Sorbs2-231;Sorbs2-215;Sorbs2-228;Sorbs2-220;Sorbs2-234;Sorbs2-207;Sorbs2-204;Sorbs2-211;Sorbs2-221;Sorbs2-229;Sorbs2-225;Sorbs2-236	Sorbs2;Sorbs2;Sorbs2;Sorbs2;Sorbs2;Sorbs2;Sorbs2;Sorbs2;Sorbs2;Sorbs2;Sorbs2;Sorbs2;Sorbs2;Sorbs2;Sorbs2;Sorbs2	0;0;0;0;0;0;0;0;0;0;0;0;0;0;0;-1144	TRUE	FALSE	FALSE	FALSE	FALSE	TRUE	TRUE	FALSE	FALSE	Exon	3	4	234214	ENSMUSG00000031626	conserved gene and region
cg02928435	NA	NA	NA	NA	0.261089265	NA	Pax2	Pax2_Intergenic_upstream	19	44684159	44684208	44684159	44684160	50	-	CGGCCATTACGGGAAAGTTAGTGTGAAACATGTTAAATTATCCCCAAAGT	Distal Intergenic	19	44756045	44837851	81807	1	Pax2-203	-71886	NA	NA	NA	FALSE	TRUE	FALSE	FALSE	FALSE	FALSE	FALSE	FALSE	TRUE	Intergenic_upstream	101	166	18504	ENSMUSG00000004231	conserved gene and region	19	44684083	44684169	87	*	87	12
cg02929405	NA	NA	NA	NA	-0.389690405	NA	Nfib	Nfib_Intron	4	82619271	82619320	82619319	82619320	50	+	TGTTATTACTGTATAGCCCTGGCAAGGCTCAAAAGCAAGCAGACTTGACG	Intron (Nfib-212/Nfib, intron 1 of 1)	4	82498321	82705750	207430	2	Nfib-212	86430	Nfib-212	Nfib	0	TRUE	FALSE	FALSE	FALSE	FALSE	FALSE	TRUE	FALSE	FALSE	Intron	31	66	18028	ENSMUSG00000008575	conserved gene and region
cg02977776	NA	NA	0.09154544	NA	NA	NA	Adam1a	Adam1a_Exon	5	121539170	121539219	121539218	121539219	50	+	ACCTCATTTCTAGCTTTTGGACGATCAAGAAGAATTTTCAGCGCAAACCG	Exon (Adam1a-202/Adam1a, exon 3 of 15)	5	121518613	121545482	26870	2	Adam1a-202	6263	Adam1a-202;Gm42878-201;Mapkapk5-201;Mapkapk5-204;Mapkapk5-202;Mapkapk5-203;Mapkapk5-205;Mapkapk5-211;Mapkapk5-209;Mapkapk5-213;Mapkapk5-208	Adam1a;Gm42878;Mapkapk5;Mapkapk5;Mapkapk5;Mapkapk5;Mapkapk5;Mapkapk5;Mapkapk5;Mapkapk5;Mapkapk5	0;0;0;0;0;0;0;0;-3319;0;0	TRUE	FALSE	FALSE	FALSE	FALSE	TRUE	TRUE	FALSE	FALSE	Exon	1	1	280668	ENSMUSG00000072647	mapped to different genes
cg03045876	NA	0.057586542	NA	NA	NA	NA	Hspa2	Hspa2_Exon	12	76405268	76405317	76405316	76405317	50	-	GGAGGAGTTCAAGCGCAAGCACAAGAAGGACATTGGGCCCAACAAGCGCG	Exon (Hspa2-201/Hspa2, exon 2 of 2)	12	76404176	76406938	2763	1	Hspa2-201	1092	Hspa2-201;Hspa2-202	Hspa2;Hspa2	0;0	TRUE	FALSE	FALSE	FALSE	FALSE	TRUE	FALSE	FALSE	FALSE	Exon	3	3	15512	ENSMUSG00000059970	conserved gene and region	12	76404926	76405509	584	*	584	56
cg03053409	NA	NA	NA	NA	-2.441144948	-1.550001179	Ncam1	Ncam1_threeUTR	9	49503656	49503705	49503704	49503705	50	+	TTTTATTTCAATACTATGACAAAAACACGTTTCACACTAAAATATTCACG	3' UTR	9	49502136	49798925	296790	2	Ncam1-204	295220	Ncam1-204;Ncam1-205;Ncam1-202	Ncam1;Ncam1;Ncam1	0;0;0	TRUE	FALSE	FALSE	FALSE	TRUE	TRUE	FALSE	FALSE	FALSE	threeUTR	3	16	17967	ENSMUSG00000039542	conserved gene and region
cg03073112	-0.006604829	NA	NA	NA	NA	NA	Lcor	Lcor_Exon	19	41558781	41558830	41558829	41558830	50	-	GCACTGGTGATCAGTACAGCTATAGCTCTTTGGTAATGGGTTCACAAACG	Exon (Lcor-201/Lcor, exon 8 of 8)	19	41482637	41562261	79625	1	Lcor-201	76144	Lcor-201;Lcor-204;Lcor-206;Lcor-202;Lcor-205	Lcor;Lcor;Lcor;Lcor;Lcor	0;0;0;0;0	TRUE	FALSE	FALSE	FALSE	FALSE	TRUE	TRUE	FALSE	FALSE	Exon	14	25	212391	ENSMUSG00000025019	mapped to different genes
cg03083106	NA	NA	NA	NA	-1.566105729	NA	Cycs-ps2	Cycs-ps2_Intergenic_upstream	5	101172198	101172247	101172198	101172199	50	+	CGCCTTTTTGACAAGAGACAAATGTTTCATTCAAATGCTGCATTTCGCAT	Distal Intergenic	5	101305578	101305869	292	1	Cycs-ps2-201	-133331	NA	NA	NA	FALSE	TRUE	FALSE	FALSE	FALSE	FALSE	FALSE	FALSE	TRUE	Intergenic_upstream	3	10	13065	NA	mapped to different genes
cg03095484	NA	NA	NA	NA	-0.878427461	-0.183395917	Nfix	Nfix_Exon	8	84716265	84716314	84716313	84716314	50	-	TTTGCCCTGGCCGCTACCGTTGGGCTGCGAACAACATAAATAGAGTGACG	Exon (Nfix-204/Nfix, exon 9 of 11)	8	84704712	84773396	68685	2	Nfix-204	57082	Nfix-204;Nfix-201;Nfix-202;Nfix-203;Nfix-206;Nfix-205	Nfix;Nfix;Nfix;Nfix;Nfix;Nfix	0;0;0;0;0;0	TRUE	FALSE	FALSE	FALSE	FALSE	TRUE	TRUE	FALSE	FALSE	Exon	20	49	18032	ENSMUSG00000001911	conserved gene but different region	8	84716235	84716387	153	*	153	15
cg03128260	NA	NA	NA	NA	-0.71825417	NA	Dennd1a	Dennd1a_Intron	2	38144157	38144206	38144205	38144206	50	+	TCTTAGGCTTCTCCAAAGTCCACACAGAATAGCAAAGAACAAAACTAACG	Intron (Dennd1a-201/Dennd1a, intron 3 of 21)	2	37798991	38287375	488385	2	Dennd1a-201	143169	Dennd1a-201;Dennd1a-207;Dennd1a-210;Dennd1a-204;Dennd1a-202;Dennd1a-209;Dennd1a-208	Dennd1a;Dennd1a;Dennd1a;Dennd1a;Dennd1a;Dennd1a;Dennd1a	0;0;0;0;0;0;0	TRUE	FALSE	FALSE	FALSE	FALSE	FALSE	TRUE	FALSE	FALSE	Intron	39	46	227801	ENSMUSG00000035392	conserved gene and region
cg03153971	NA	NA	NA	NA	0.982645782	NA	Frs2	Frs2_Exon	10	117077598	117077647	117077646	117077647	50	+	CTATTATTTTGCATAATCTCTTGCAACATGTTAAATAATTCTTCTGCACG	Exon (Frs2-201/Frs2, exon 8 of 10)	10	117069427	117148510	79084	2	Frs2-201	70863	Frs2-201	Frs2	0	TRUE	FALSE	FALSE	FALSE	FALSE	TRUE	FALSE	FALSE	FALSE	Exon	3	3	327826	ENSMUSG00000020170	conserved gene and region
cg03182693	NA	NA	0.732643399	NA	NA	NA	Ctnnd1	Ctnnd1_fiveUTR	2	84624410	84624459	84624458	84624459	50	+	GTTCCTTCACAGAGGCCAAGATGCTGGCGGTCGACTCCACCTCTGAGTCG	5' UTR	2	84600071	84650745	50675	2	Ctnnd1-204	26286	Ctnnd1-204;Ctnnd1-206;Ctnnd1-207;Ctnnd1-208;Ctnnd1-209;Ctnnd1-216;Ctnnd1-220;Ctnnd1-221;Ctnnd1-222;Ctnnd1-224;Ctnnd1-203;Ctnnd1-211;Ctnnd1-212;Ctnnd1-213;Ctnnd1-214;Ctnnd1-215;Ctnnd1-218;Ctnnd1-219;Ctnnd1-210;Ctnnd1-205;Ctnnd1-223;Ctnnd1-201;Ctnnd1-202;Ctnnd1-228;Ctnnd1-217;Ctnnd1-225;Ctnnd1-229;Gm28635-201	Ctnnd1;Ctnnd1;Ctnnd1;Ctnnd1;Ctnnd1;Ctnnd1;Ctnnd1;Ctnnd1;Ctnnd1;Ctnnd1;Ctnnd1;Ctnnd1;Ctnnd1;Ctnnd1;Ctnnd1;Ctnnd1;Ctnnd1;Ctnnd1;Ctnnd1;Ctnnd1;Ctnnd1;Ctnnd1;Ctnnd1;Ctnnd1;Ctnnd1;Ctnnd1;Ctnnd1;Gm28635	0;0;0;0;0;0;0;0;0;0;0;0;0;0;0;0;0;0;0;0;0;0;0;0;0;0;0;0	TRUE	FALSE	FALSE	TRUE	FALSE	TRUE	TRUE	FALSE	FALSE	fiveUTR	3	4	12388	ENSMUSG00000034101	mapped to different genes
cg03187959	NA	NA	-0.047253249	NA	NA	NA	Ing4	Ing4_Exon	6	125046920	125046969	125046968	125046969	50	+	TGACAAGTTGGCCACTGAGTATATGAGTAGTGCCCGCAGCCTGAGCTCCG	Exon (Ing4-205/Ing4, exon 3 of 8)	6	125039760	125049002	9243	1	Ing4-205	7160	Acrbp-205;Acrbp-204;Acrbp-202;Acrbp-201;Acrbp-203;Ing4-205;Ing4-203;Ing4-201;Ing4-208;Ing4-207;Ing4-202;Ing4-209;Ing4-204;Ing4-206	Acrbp;Acrbp;Acrbp;Acrbp;Acrbp;Ing4;Ing4;Ing4;Ing4;Ing4;Ing4;Ing4;Ing4;Ing4	-2720;-2978;-2990;-2998;-4885;0;7084;0;0;0;0;0;0;0	TRUE	FALSE	FALSE	FALSE	FALSE	TRUE	TRUE	FALSE	FALSE	Exon	4	5	28019	ENSMUSG00000030330	conserved gene but different region
cg03201458	NA	0.455035012	NA	NA	NA	NA	Nabp2	Nabp2_Exon	10	128409272	128409321	128409320	128409321	50	-	GTTCAGATTCTTGAGCCCAGGCTTGATATCCTTCACAAAGGTCTCCGTCG	Promoter (<=1kb)	10	128401395	128409728	8334	2	Nabp2-202	407	Ankrd52-202;Nabp2-202;Nabp2-201;Nabp2-204;Nabp2-205;Nabp2-209;Nabp2-203;Nabp2-208;Nabp2-207;Nabp2-206;Rnf41-202;Rnf41-203;Rnf41-201	Ankrd52;Nabp2;Nabp2;Nabp2;Nabp2;Nabp2;Nabp2;Nabp2;Nabp2;Nabp2;Rnf41;Rnf41;Rnf41	0;0;0;0;-429;0;0;-92;0;0;-2336;-2392;-2425	TRUE	FALSE	TRUE	FALSE	FALSE	TRUE	FALSE	FALSE	FALSE	Exon	2	2	69917	ENSMUSG00000025374	conserved gene and region	10	128409289	128409357	69	*	69	8
cg03256017	NA	NA	NA	-0.106716369	NA	NA	Srsf4	Srsf4_Exon	4	131884258	131884307	131884306	131884307	50	-	TTTCCTCTATTCTTCTAGTCTGTTATGTTCTGAACCCACACATGTTTTCG	Promoter (<=1kb)	4	131884295	131897834	13540	1	Srsf4-204	0	Srsf4-202;Srsf4-203;Srsf4-204;Srsf4-201	Srsf4;Srsf4;Srsf4;Srsf4	0;0;0;-901	TRUE	FALSE	TRUE	FALSE	FALSE	TRUE	TRUE	FALSE	FALSE	Exon	4	4	57317	ENSMUSG00000028911	conserved gene and region
cg03268781	-0.012090491	NA	NA	NA	NA	NA	Pou3f1	Pou3f1_Intron	4	124575875	124575924	124575875	124575876	50	+	CGCCCAGTAGAATATTGTATTAGTTGGTTGTGAGCTGTGTTCTCGTCAGG	Intron (Gm2164-201/Gm2164-201, intron 1 of 1)	4	124656807	124660655	3849	1	Pou3f1-201	-80883	NA	NA	NA	TRUE	FALSE	FALSE	FALSE	FALSE	FALSE	TRUE	FALSE	FALSE	Intron	43	85	18991	ENSMUSG00000090125	mapped to different genes	4	124575578	124575876	299	*	299	39
cg03274991	NA	-0.164357074	NA	NA	NA	NA	Arhgef12	Arhgef12_fiveUTR	9	43105313	43105362	43105361	43105362	50	-	GGGACACAAAAGTCCAACTCAAAACTCCATTCAGTCATCTAGACCATCCG	Promoter (<=1kb)	9	42963842	43105987	142146	2	Arhgef12-202	625	Arhgef12-202;Arhgef12-201;Arhgef12-205;Tlcd5-201;Tlcd5-203;Tlcd5-202	Arhgef12;Arhgef12;Arhgef12;Tlcd5;Tlcd5;Tlcd5	0;0;0;11208;11171;11182	TRUE	FALSE	TRUE	TRUE	FALSE	TRUE	TRUE	FALSE	FALSE	fiveUTR	1	5	69632	ENSMUSG00000059495	conserved gene and region	9	43105361	43106549	1189	*	1189	136
cg03295083	NA	NA	NA	NA	-0.626467821	NA	Nrxn1	Nrxn1_fiveUTR	17	90455928	90455977	90455928	90455929	50	-	CGCTGGTGAAGCAAGGGGCTCTATGCAAATCTGCAGTCTCCAAACAGCAA	Promoter (<=1kb)	17	90036896	90455950	419055	2	Nrxn1-213	0	Gm10493-201;Nrxn1-202;Nrxn1-207;Nrxn1-216;Nrxn1-204;Nrxn1-217;Nrxn1-209;Nrxn1-201;Nrxn1-213;Nrxn1-206;Nrxn1-221;Nrxn1-208;Nrxn1-222;Nrxn1-218;Nrxn1-226	Gm10493;Nrxn1;Nrxn1;Nrxn1;Nrxn1;Nrxn1;Nrxn1;Nrxn1;Nrxn1;Nrxn1;Nrxn1;Nrxn1;Nrxn1;Nrxn1;Nrxn1	0;0;0;0;0;0;0;0;0;0;0;0;0;0;0	TRUE	FALSE	TRUE	TRUE	FALSE	TRUE	TRUE	FALSE	FALSE	fiveUTR	1	27	18189	ENSMUSG00000024109	conserved gene and region
cg03295832	NA	NA	NA	0.785569598	NA	NA	Fzd5	Fzd5_Exon	1	64735050	64735099	64735050	64735051	50	-	CGACGTGATGCCCACCACCAGGCACATGAAGTACTTGAGCATGAGCACCC	Exon (Fzd5-201/Fzd5, exon 2 of 2)	1	64730558	64737751	7194	2	Fzd5-201	2652	Fzd5-201;Fzd5-202	Fzd5;Fzd5	0;0	TRUE	FALSE	FALSE	FALSE	FALSE	TRUE	FALSE	FALSE	FALSE	Exon	2	3	14367	ENSMUSG00000045005	conserved gene and region	1	64734827	64735054	228	*	228	23
cg03365311	NA	NA	NA	NA	-1.362853654	NA	Hsd17b12	Hsd17b12_Exon	2	94241383	94241432	94241431	94241432	50	+	TTGGGGTAAGGGCTTCCGGCTATTGAGTTATGTACAGCAAGCCCAGACCG	Exon (Mir129b-201/Mir129b-201, exon 1 of 1)	2	94032689	94157964	125276	2	Hsd17b12-201	-83419	NA	NA	NA	TRUE	FALSE	FALSE	FALSE	FALSE	TRUE	TRUE	FALSE	FALSE	Exon	5	19	56348	ENSMUSG00000027195	mapped to different genes	2	94241115	94241769	655	*	655	63
cg03369923	NA	NA	NA	NA	1.627928039	0.536386827	Ptprz1	Ptprz1_Exon	6	23000278	23000327	23000326	23000327	50	-	TCAACACTACCCCTGCTGCTTCAAGTAGTGATTCGGCCTTGCATGCTACG	Exon (Ptprz1-201/Ptprz1, exon 12 of 30)	6	22875502	23052916	177415	1	Ptprz1-201	124776	Ptprz1-201;Ptprz1-206;Ptprz1-204;Ptprz1-203	Ptprz1;Ptprz1;Ptprz1;Ptprz1	0;0;0;13969	TRUE	FALSE	FALSE	FALSE	FALSE	TRUE	TRUE	FALSE	FALSE	Exon	3	4	19283	ENSMUSG00000068748	conserved gene but different region
cg03380023	0.053579027	NA	NA	NA	NA	NA	Akap6	Akap6_Intron	12	53124748	53124797	53124748	53124749	50	-	CGTTTAAGTGTTAAAAAATTTCATTAATGATGCATAGAGCTATCTACTTC	Intron (Akap6-201/Akap6, intron 12 of 13)	12	52699383	53155599	456217	1	Akap6-201	425365	Akap6-201;Akap6-202	Akap6;Akap6	0;0	TRUE	FALSE	FALSE	FALSE	FALSE	FALSE	TRUE	FALSE	FALSE	Intron	12	13	238161	ENSMUSG00000061603	conserved gene and region
cg03445175	0.360893748	NA	NA	NA	NA	NA	Maz	Maz_Exon	7	127025337	127025386	127025385	127025386	50	-	TAGGGCTTGTGCACAGCGCCGTCATGTGAGCGCACGTGGTAGCTCATGCG	Exon (Maz-203/Maz, exon 2 of 6)	7	127022130	127026526	4397	2	Maz-203	1140	Gm42742-203;Gm42742-204;Gm42742-202;Kif22-202;Kif22-201;Kif22-205;Kif22-206;Maz-203;Maz-201;Maz-204;Maz-202;Maz-206;Maz-205;Prrt2-201;Prrt2-202;Prrt2-205;Prrt2-206;Prrt2-207	Gm42742;Gm42742;Gm42742;Kif22;Kif22;Kif22;Kif22;Maz;Maz;Maz;Maz;Maz;Maz;Prrt2;Prrt2;Prrt2;Prrt2;Prrt2	0;0;0;3571;17085;2730;7318;0;0;0;0;0;0;0;0;-4381;-4200;-4982	TRUE	FALSE	FALSE	FALSE	FALSE	TRUE	TRUE	FALSE	FALSE	Exon	16	17	17188	ENSMUSG00000030678	conserved gene and region	7	127025353	127025621	269	*	269	30
cg03469472	-0.025579788	NA	NA	NA	NA	NA	Rc3h1	Rc3h1_fiveUTR	1	160906486	160906535	160906486	160906487	50	+	CGAGCAACAAGATGGCCCCTGCTGCAGGAGCAGCCTCAGCAGCAGCAGGT	Promoter (<=1kb)	1	160906418	160974978	68561	1	Rc3h1-202	68	Rc3h1-202;Rc3h1-204	Rc3h1;Rc3h1	0;0	TRUE	FALSE	TRUE	TRUE	FALSE	TRUE	FALSE	FALSE	FALSE	fiveUTR	2	8	381305	ENSMUSG00000040423	conserved gene but different region	1	160906172	160906487	316	*	316	39
cg03475710	-0.114875877	NA	NA	NA	NA	NA	Mecom	Mecom_Intron	3	30220930	30220979	30220978	30220979	50	+	ACTTTGCTGACAGCTTGTCACATTTCACTGACTGTCTGTCTGGGGTACCG	Intron (Mecom-212/Mecom, intron 1 of 15)	3	29951299	30509733	558435	2	Mecom-212	288754	Mecom-212;Mecom-210;Mecom-213;Mecom-207;Mecom-208;Mecom-211	Mecom;Mecom;Mecom;Mecom;Mecom;Mecom	0;0;0;0;0;0	TRUE	FALSE	FALSE	FALSE	FALSE	FALSE	TRUE	FALSE	FALSE	Intron	57	80	14013	ENSMUSG00000027684	conserved gene and region
cg03523182	-0.00039103	NA	NA	NA	NA	NA	Jade1	Jade1_Exon	3	41581233	41581282	41581233	41581234	50	+	CGCCTTCCCAGCAGCAGTGAGGATTCTGACGACAATGGCAGTAAGTCCTG	Exon (Jade1-201/Jade1, exon 2 of 11)	3	41555731	41616864	61134	1	Jade1-201	25502	Jade1-201;Jade1-210;Jade1-214;Jade1-202;Jade1-209;Jade1-204;Jade1-203;Jade1-211;Jade1-206;Jade1-212	Jade1;Jade1;Jade1;Jade1;Jade1;Jade1;Jade1;Jade1;Jade1;Jade1	0;0;0;0;0;0;0;0;0;0	TRUE	FALSE	FALSE	FALSE	FALSE	TRUE	TRUE	FALSE	FALSE	Exon	6	16	269424	ENSMUSG00000025764	conserved gene and region
cg03571891	NA	NA	NA	NA	0.240660499	NA	Pax5	Pax5_Exon	4	44703360	44703409	44703360	44703361	50	+	CGCCTACTTACTATGCATGGATGCAAACGGGTCGTGCTTACAGTGTATTT	Exon (Pax5-208/Pax5, exon 1 of 5)	4	44524757	44710487	185731	2	Pax5-201	7078	Pax5-201;Pax5-202;Pax5-203;Pax5-204;Pax5-205;Pax5-207;Pax5-206;Pax5-209;Pax5-210;Pax5-212;Pax5-213;Pax5-214;Pax5-215;Pax5-208;Pax5-216;Pax5-217;Pax5-218;Pax5-219	Pax5;Pax5;Pax5;Pax5;Pax5;Pax5;Pax5;Pax5;Pax5;Pax5;Pax5;Pax5;Pax5;Pax5;Pax5;Pax5;Pax5;Pax5	0;0;0;0;0;0;0;0;0;0;0;0;0;0;0;0;0;0	TRUE	FALSE	FALSE	FALSE	FALSE	TRUE	TRUE	FALSE	FALSE	Exon	12	45	18507	ENSMUSG00000014030	conserved gene but different region	4	44703085	44703505	421	*	421	37
cg03600422	-0.002059974	NA	NA	NA	NA	NA	Blcap	Blcap_fiveUTR	2	157558115	157558164	157558163	157558164	50	+	GATGAGGAGGACGGGCAGCAGCCACTGGAGGCAATACATGATCTCTGCCG	5' UTR	2	157556362	157566337	9976	2	Blcap-202	8173	Blcap-202;Blcap-201;Blcap-205;Blcap-204;Nnat-205;Nnat-208;Nnat-202;Nnat-210;Nnat-207;Nnat-209;Nnat-206;Nnat-201;Nnat-204;Nnat-203	Blcap;Blcap;Blcap;Blcap;Nnat;Nnat;Nnat;Nnat;Nnat;Nnat;Nnat;Nnat;Nnat;Nnat	0;0;0;0;0;0;0;0;0;0;0;0;0;0	TRUE	FALSE	FALSE	TRUE	FALSE	TRUE	FALSE	FALSE	FALSE	fiveUTR	3	9	53619	ENSMUSG00000067787	conserved gene and region
cg03613012	NA	NA	NA	NA	-0.926951762	NA	Dscaml1	Dscaml1_fiveUTR	9	45430415	45430464	45430415	45430416	50	+	CGCACGGCCGGCCACAGGACCACCTCCCCGGAGAATAGGGCCTCTTTATG	5' UTR	9	45426628	45571224	144597	1	Dscaml1-208	3787	Dscaml1-208;Dscaml1-209;Dscaml1-202;Dscaml1-206;Dscaml1-211;Dscaml1-201;Dscaml1-210	Dscaml1;Dscaml1;Dscaml1;Dscaml1;Dscaml1;Dscaml1;Dscaml1	0;0;0;0;0;0;0	TRUE	FALSE	FALSE	TRUE	FALSE	TRUE	TRUE	FALSE	FALSE	fiveUTR	3	32	114873	ENSMUSG00000032087	conserved gene and region	9	45430237	45430444	208	*	208	27
cg03630714	NA	0.005159319	NA	NA	NA	NA	Clpb	Clpb_Intron	7	101692252	101692301	101692252	101692253	50	-	CGGTGGAAGGCACTTTGATGTTACAACCTCTCGGTGATGCTTTACTTAGT	Intron (Clpb-205/Clpb, intron 3 of 5)	7	101663633	101722922	59290	1	Clpb-205	28619	Clpb-205;Clpb-201;Clpb-202;Clpb-206;Clpb-211;Clpb-203;Clpb-208;Clpb-207;Clpb-210	Clpb;Clpb;Clpb;Clpb;Clpb;Clpb;Clpb;Clpb;Clpb	0;0;0;0;0;0;0;0;0	TRUE	FALSE	FALSE	FALSE	FALSE	FALSE	TRUE	FALSE	FALSE	Intron	21	21	20480	ENSMUSG00000001829	conserved gene and region
cg03657398	NA	NA	NA	NA	NA	-0.344871954	Prdm6	Prdm6_Intron	18	53538480	53538529	53538480	53538481	50	-	CGTTTTGTTTTTATTTTGAGGCTGACAATAATGTTTATTGGCATGTGTTC	Intron (Prdm6-201/Prdm6, intron 3 of 6)	18	53464516	53575857	111342	1	Prdm6-201	73964	Prdm6-201;Prdm6-203;Prdm6-204	Prdm6;Prdm6;Prdm6	0;0;0	TRUE	FALSE	FALSE	FALSE	FALSE	FALSE	TRUE	FALSE	FALSE	Intron	10	16	225518	ENSMUSG00000069378	conserved gene and region
cg03679521	0.016642884	NA	NA	NA	NA	NA	Neurod2	Neurod2_fiveUTR	11	98329605	98329654	98329605	98329606	50	-	CGGAGCGAGTGTGGCATCTCTACCAGGCGGGGTACCAGCCTCTATGCCAG	Promoter (<=1kb)	11	98325415	98329648	4234	2	Neurod2-201	0	Neurod2-201	Neurod2	0	TRUE	FALSE	TRUE	TRUE	FALSE	TRUE	FALSE	FALSE	FALSE	fiveUTR	5	22	18013	ENSMUSG00000038255	conserved gene and region	11	98329512	98329756	245	*	245	22
cg03724931	NA	0.10908364	NA	NA	NA	NA	Smg6	Smg6_Intron	11	75054288	75054337	75054288	75054289	50	+	CGATCATTTCCTCACTTGTTTAAATAGTGCAGCTTGTGTTGGCAGTGCTC	Intron (Smg6-201/Smg6, intron 13 of 18)	11	74925823	75164448	238626	1	Smg6-201	128465	Smg6-201;Smg6-202;Smg6-204	Smg6;Smg6;Smg6	0;0;0	TRUE	FALSE	FALSE	FALSE	FALSE	FALSE	TRUE	FALSE	FALSE	Intron	31	34	103677	ENSMUSG00000038290	conserved gene and region
cg03754039	NA	NA	NA	NA	0.090962719	NA	Pitx2	Pitx2_Exon	3	129213909	129213958	129213957	129213958	50	+	CCAGGAAGCCCGCCTCTGGTTTTAAGATGTTAGGCCAACAGGGAAGCGCG	Promoter (<=1kb)	3	129213932	129216774	2843	1	Pitx2-208	0	Pitx2-207;Pitx2-201;Pitx2-203;Pitx2-204;Pitx2-208;Pitx2-202;Pitx2-206	Pitx2;Pitx2;Pitx2;Pitx2;Pitx2;Pitx2;Pitx2	0;0;0;0;0;0;-317	TRUE	FALSE	TRUE	FALSE	FALSE	TRUE	TRUE	FALSE	FALSE	Exon	4	24	18741	ENSMUSG00000028023	mapped to different genes	3	129213666	129214125	460	*	460	39
cg03775588	NA	NA	NA	NA	0.637879727	NA	Pax6	Pax6_Exon	2	105682292	105682341	105682292	105682293	50	+	CGGAGCGGAGCACTGTCACAAAGTGACAAGGCTGCCACAAGCGCCCCGAC	Exon (Pax6-221/Pax6, exon 1 of 2)	2	105668900	105697364	28465	1	Pax6-206	13392	Pax6-206;Pax6-207;Pax6-210;Pax6-214;Pax6-208;Pax6-202;Pax6-205;Pax6-225;Pax6-204;Pax6-201;Pax6-203;Pax6-224;Pax6-219;Pax6-221;Pax6-213;Pax6-211;Pax6-222;Pax6-212;Pax6-215;Pax6-223;Pax6-209;Pax6-216	Pax6;Pax6;Pax6;Pax6;Pax6;Pax6;Pax6;Pax6;Pax6;Pax6;Pax6;Pax6;Pax6;Pax6;Pax6;Pax6;Pax6;Pax6;Pax6;Pax6;Pax6;Pax6	0;0;0;0;0;0;0;0;0;0;0;0;0;0;0;0;0;0;0;0;0;0	TRUE	FALSE	FALSE	FALSE	FALSE	TRUE	TRUE	FALSE	FALSE	Exon	31	78	18508	ENSMUSG00000027168	conserved gene and region	2	105682176	105682419	244	*	244	18
cg03787614	NA	NA	0.148407045	NA	NA	NA	Grik2	Grik2_Exon	10	49244318	49244367	49244318	49244319	50	-	CGTATACCTTGCTGCATGAGAGCTCCAACTCCAAACCAGAAACTATTTAG	Exon (Grik2-207/Grik2, exon 13 of 17)	10	49094833	49788766	693934	2	Grik2-207	544399	Grik2-207;Grik2-203;Grik2-202;Grik2-205;Grik2-209;Grik2-204;Grik2-201;Grik2-208	Grik2;Grik2;Grik2;Grik2;Grik2;Grik2;Grik2;Grik2	0;0;0;0;0;0;0;0	TRUE	FALSE	FALSE	FALSE	FALSE	TRUE	TRUE	FALSE	FALSE	Exon	8	12	14806	ENSMUSG00000056073	conserved gene but different region
cg03824676	NA	NA	-0.03900075	NA	NA	NA	Rbm39	Rbm39_threeUTR	2	156177842	156177891	156177842	156177843	50	+	CGCCCATTTCCGTTGGAGGGTTGGGACTGTAAGAGCTTGATGCCACCTCT	3' UTR	2	156147239	156180238	33000	2	Rbm39-203	2347	Rbm39-203;Rbm39-217;Rbm39-215;Rbm39-201;Rbm39-225;Rbm39-223;Rbm39-204;Rbm39-216;Rbm39-221;Rbm39-213;Rbm39-214;Rbm39-218;Rbm39-219;Rbm39-210;Rbm39-224;Rbm39-212;Rbm39-202;Rbm39-208;Rbm39-222;Rbm39-205;Rbm39-211	Rbm39;Rbm39;Rbm39;Rbm39;Rbm39;Rbm39;Rbm39;Rbm39;Rbm39;Rbm39;Rbm39;Rbm39;Rbm39;Rbm39;Rbm39;Rbm39;Rbm39;Rbm39;Rbm39;Rbm39;Rbm39	0;0;0;0;0;0;0;0;0;0;0;0;0;0;0;0;0;0;0;0;0	TRUE	FALSE	FALSE	FALSE	TRUE	TRUE	TRUE	FALSE	FALSE	threeUTR	11	13	170791	ENSMUSG00000027620	conserved gene but different region
cg03843584	NA	NA	NA	NA	-0.231485724	NA	Atp5g2	Atp5g2_Promoter	15	102672380	102672429	102672428	102672429	50	-	CCCGGATGAGGCCCCGAGTTTAATTATCCTCGCGGAGGAATTTCAATGCG	Promoter (<=1kb)	15	102665801	102672352	6552	2	Atp5g2-203	-77	Atp5g2-202;Atp5g2-201;Atp5g2-204;Atp5g2-203	Atp5g2;Atp5g2;Atp5g2;Atp5g2	-1253;-4631;-4637;0	FALSE	TRUE	TRUE	FALSE	FALSE	FALSE	FALSE	FALSE	FALSE	Promoter	10	18	67942	ENSMUSG00000062683	mapped to different genes	15	102672078	102672489	412	*	412	37
cg03846926	NA	NA	NA	-0.064146257	NA	NA	Skida1	Skida1_Promoter	2	18048822	18048871	18048822	18048823	50	-	CGTCCGGAGACACCTTCATCAATTAATTCCCCTAAAGCCAGCGCTGATTG	Promoter (<=1kb)	2	18044083	18049051	4969	2	Skida1-202	180	Skida1-205;Skida1-202;Skida1-201;Skida1-203;Skida1-204	Skida1;Skida1;Skida1;Skida1;Skida1	0;0;0;0;0	TRUE	FALSE	TRUE	FALSE	FALSE	FALSE	TRUE	FALSE	FALSE	Promoter	12	31	72668	ENSMUSG00000054074	conserved gene but different region
cg03862352	NA	NA	NA	NA	0.434463528	NA	Lhfpl3	Lhfpl3_Exon	5	22746291	22746340	22746291	22746292	50	+	CGTGCTGTGGGCCATCTTCACCATCTGCTTTGCCATCGTCAACGTGGTGT	Promoter (<=1kb)	5	22746059	23275597	529539	1	Lhfpl3-202	232	Lhfpl3-202	Lhfpl3	0	TRUE	FALSE	TRUE	FALSE	FALSE	TRUE	TRUE	FALSE	FALSE	Exon	11	11	269629	ENSMUSG00000106379	conserved gene and region	5	22746271	22746758	488	*	488	33
cg03957108	0.670688998	NA	NA	NA	NA	NA	Otx1	Otx1_Promoter	11	22003031	22003080	22003031	22003032	50	+	CGAATAAAATACGGTAACAGAATATGATGGAGGGCACACTGTTTCCTTAA	Promoter (<=1kb)	11	21996858	22002897	6040	2	Otx1-202	-134	Ehbp1-201;Ehbp1-202;Ehbp1-207;Otx1-201;Otx1-203;Otx1-202	Ehbp1;Ehbp1;Ehbp1;Otx1;Otx1;Otx1	0;0;0;0;0;0	FALSE	TRUE	TRUE	FALSE	FALSE	FALSE	FALSE	FALSE	FALSE	Promoter	8	13	18423	ENSMUSG00000005917	conserved gene and region	11	22002787	22003135	349	*	349	29
cg03957964	NA	NA	NA	NA	-0.111509743	NA	Kcnma1	Kcnma1_Exon	14	24003796	24003845	24003796	24003797	50	-	CGTCCGCCAGAGCAAGATGATGAAGAGGCCCCCGAAGAAAGTCACCATGG	Exon (4930519K11Rik-201/4930519K11Rik-201, exon 1 of 4)	14	23292291	24004859	712569	2	Kcnma1-205	1014	Kcnma1-205;Kcnma1-212;Kcnma1-211;Kcnma1-229;Kcnma1-234;Kcnma1-223;Kcnma1-214;Kcnma1-216;Kcnma1-219;Kcnma1-220;Kcnma1-224;Kcnma1-233;Kcnma1-236;Kcnma1-237;Kcnma1-213;Kcnma1-228;Kcnma1-221;Kcnma1-225;Kcnma1-226;Kcnma1-230;Kcnma1-235;Kcnma1-238;Kcnma1-215	Kcnma1;Kcnma1;Kcnma1;Kcnma1;Kcnma1;Kcnma1;Kcnma1;Kcnma1;Kcnma1;Kcnma1;Kcnma1;Kcnma1;Kcnma1;Kcnma1;Kcnma1;Kcnma1;Kcnma1;Kcnma1;Kcnma1;Kcnma1;Kcnma1;Kcnma1;Kcnma1	0;0;0;0;0;0;0;0;0;0;0;0;0;0;0;0;0;0;0;0;0;0;0	TRUE	FALSE	FALSE	FALSE	FALSE	TRUE	TRUE	FALSE	FALSE	Exon	16	41	16531	ENSMUSG00000063142	conserved gene and region	14	24003668	24003829	162	*	162	18
cg04004289	NA	NA	NA	NA	-0.974071762	NA	Fezf2	Fezf2_fiveUTR	14	12345697	12345746	12345745	12345746	50	-	TTCAGCTGACATCACATGAAGTCACTTGAAGTGGAATGACATGGGCGGCG	Promoter (<=1kb)	14	12342094	12345844	3751	2	Fezf2-203	98	Fezf2-203;Fezf2-201;Fezf2-202	Fezf2;Fezf2;Fezf2	0;0;0	TRUE	FALSE	TRUE	TRUE	FALSE	TRUE	FALSE	FALSE	FALSE	fiveUTR	13	45	54713	ENSMUSG00000021743	conserved gene and region	14	12345742	12345947	206	*	206	23
cg04019067	NA	NA	-0.176777118	NA	NA	NA	Fgfr2	Fgfr2_Intron	7	132666029	132666078	132666077	132666078	50	-	ACCTAATATAATCCATAGATCAATGGGTTTGGAGCTAATTAAGGCAACCG	Intron (Lhpp-201/Lhpp, intron 6 of 6)	7	130162451	133123350	2960900	2	Fgfr2-217	457272	Fgfr2-217;Lhpp-201;Lhpp-202;Lhpp-204;Lhpp-206;Lhpp-207	Fgfr2;Lhpp;Lhpp;Lhpp;Lhpp;Lhpp	0;0;0;0;0;0	TRUE	FALSE	FALSE	FALSE	FALSE	FALSE	TRUE	FALSE	FALSE	Intron	58	79	14183	ENSMUSG00000030849	mapped to different genes
cg04050843	NA	NA	NA	NA	-0.484614602	NA	Kcnh4	Kcnh4_Exon	11	100759551	100759600	100759551	100759552	50	-	CGATGGTGTCCAGGAAGGTGTTTTGCGGGGCCAGCAACCCCTTCATGACC	Promoter (<=1kb)	11	100740376	100759740	19365	2	Kcnh4-201	140	Hcrt-202;Hcrt-201;Kcnh4-201;Kcnh4-202	Hcrt;Hcrt;Kcnh4;Kcnh4	3328;3331;0;0	TRUE	FALSE	TRUE	FALSE	FALSE	TRUE	FALSE	FALSE	FALSE	Exon	2	2	380728	ENSMUSG00000035355	conserved gene and region	11	100759517	100759733	217	*	217	29
cg04084157	2.56352673	NA	NA	NA	NA	NA	Vgf	Vgf_Intron	5	137030036	137030085	137030084	137030085	50	-	AGCATTTCATTCATTCATTCATTCATTCATTTCCCGGAGCTCCGCTAGCG	Intron (Vgf-204/Vgf, intron 3 of 4)	5	137026392	137033351	6960	1	Vgf-204	3644	Ap1s1-201;Vgf-204;Vgf-201;Vgf-202;Vgf-203	Ap1s1;Vgf;Vgf;Vgf;Vgf	16050;0;-210;-279;-616	TRUE	FALSE	FALSE	FALSE	FALSE	FALSE	TRUE	FALSE	FALSE	Intron	1	1	381677	ENSMUSG00000037428	conserved gene but different region	5	137029992	137030508	517	*	517	45
cg04118146	NA	NA	0.174287106	NA	NA	NA	Uchl3	Uchl3_Exon	14	101685616	101685665	101685664	101685665	50	-	ACGAAGGCCTCATCATTGTGTCACCATGCATCCCTGCCCTGGGTCAAACG	Exon (Uchl3-202/Uchl3, exon 5 of 8)	14	101653994	101696125	42132	1	Uchl3-201	31622	Uchl3-201;Uchl3-205;Uchl3-202	Uchl3;Uchl3;Uchl3	0;0;0	TRUE	FALSE	FALSE	FALSE	FALSE	TRUE	TRUE	FALSE	FALSE	Exon	4	4	50933	ENSMUSG00000022111	mapped to different genes
cg04121944	0.001454358	NA	NA	NA	NA	NA	Maz	Maz_Exon	7	127025389	127025438	127025437	127025438	50	-	CCTTGCGCTTGAAGCGCTGCTGGCACACCGGGCACTGGTAGGGCTTCTCG	Exon (Maz-203/Maz, exon 2 of 6)	7	127022130	127026526	4397	2	Maz-203	1088	Gm42742-203;Gm42742-204;Gm42742-202;Kif22-202;Kif22-201;Kif22-205;Kif22-206;Maz-203;Maz-201;Maz-204;Maz-202;Maz-206;Maz-205;Prrt2-201;Prrt2-202;Prrt2-205;Prrt2-206	Gm42742;Gm42742;Gm42742;Kif22;Kif22;Kif22;Kif22;Maz;Maz;Maz;Maz;Maz;Maz;Prrt2;Prrt2;Prrt2;Prrt2	0;0;0;3519;17033;2678;7266;0;0;0;0;0;0;0;0;-4433;-4252	TRUE	FALSE	FALSE	FALSE	FALSE	TRUE	TRUE	FALSE	FALSE	Exon	16	17	17188	ENSMUSG00000030678	conserved gene and region	7	127025353	127025621	269	*	269	30
cg04130851	NA	NA	NA	-0.379845347	NA	NA	Etv6	Etv6_fiveUTR	6	134222896	134222945	134222896	134222897	50	-	CGTAGCCCAGTGGCTCAAGTGGGCTGAAAATGAGTTTTCTTTAAGGCCAA	5' UTR	6	134035700	134270155	234456	1	Etv6-201	187196	Etv6-201;Etv6-202;Etv6-204	Etv6;Etv6;Etv6	0;0;0	TRUE	FALSE	FALSE	TRUE	FALSE	TRUE	FALSE	FALSE	FALSE	fiveUTR	1	7	14011	ENSMUSG00000030199	conserved gene but different region
cg04142398	NA	NA	-0.363244516	NA	NA	NA	Mef2c	Mef2c_threeUTR	13	83652834	83652883	83652834	83652835	50	+	CGAAACTCACCAGGTCTGCTGGTCTCACCTGGTAACTTGAACAAGAATAT	3' UTR	13	83504034	83663343	159310	1	Mef2c-218	148800	Mef2c-218;Mef2c-228;Mef2c-201;Mef2c-202;Mef2c-222;Mef2c-223;Mef2c-227;Mef2c-213;Mef2c-214;Mef2c-215;Mef2c-212;Mef2c-203;Mef2c-224;Mef2c-219;Mef2c-225;Mef2c-230;Mef2c-220;Mef2c-211	Mef2c;Mef2c;Mef2c;Mef2c;Mef2c;Mef2c;Mef2c;Mef2c;Mef2c;Mef2c;Mef2c;Mef2c;Mef2c;Mef2c;Mef2c;Mef2c;Mef2c;Mef2c	0;0;0;0;0;0;0;0;0;0;0;0;0;0;0;0;0;0	TRUE	FALSE	FALSE	FALSE	TRUE	TRUE	FALSE	FALSE	FALSE	threeUTR	10	41	17260	ENSMUSG00000005583	mapped to different genes
cg04197544	NA	NA	NA	NA	2.146946758	NA	Gm7847	Gm7847_Intergenic_upstream	18	26263050	26263099	26263098	26263099	50	-	AAAATGCTTAATATTAATAATAAAATGCATTCACTGCAAGCCTCTAGGCG	Distal Intergenic	18	25823581	25824357	777	2	Gm7847-201	-438742	NA	NA	NA	FALSE	TRUE	FALSE	FALSE	FALSE	FALSE	FALSE	FALSE	TRUE	Intergenic_upstream	11	22	665916	NA	mapped to different genes
cg04207566	NA	NA	NA	NA	1.983573487	NA	Tbx2	Tbx2_fiveUTR	11	85832800	85832849	85832848	85832849	50	+	TGTGAGATAGTCACAGTTTTCCAGAGATCACGACAAGATCTAACCAGTCG	Promoter (<=1kb)	11	85832551	85841948	9398	1	Tbx2-201	249	Tbx2-201	Tbx2	0	TRUE	FALSE	TRUE	TRUE	FALSE	TRUE	FALSE	FALSE	FALSE	fiveUTR	12	14	21385	ENSMUSG00000000093	mapped to different genes	11	85832848	85833430	583	*	583	90
cg04236764	NA	NA	NA	NA	0.013942039	NA	Dscam	Dscam_Exon	16	96640876	96640925	96640876	96640877	50	+	CGTTTTGGACAACTGACTTAATGAGTGGAGGAATTGTACCTGAAAGCAGG	Exon (Dscam-201/Dscam, exon 27 of 33)	16	96590840	97170752	579913	2	Dscam-201	529827	Dscam-201	Dscam	0	TRUE	FALSE	FALSE	FALSE	FALSE	TRUE	TRUE	FALSE	FALSE	Exon	10	12	13508	ENSMUSG00000050272	conserved gene and region
cg04244133	NA	0.035186952	NA	NA	NA	NA	Celf5	Celf5_Exon	10	81462669	81462718	81462669	81462670	50	+	CGAAACACTTGCTCTGGTTGGTAGCTCGATCCATAAACACCTTGGAGGAA	Exon (Celf5-201/Celf5, exon 11 of 12)	10	81459227	81482709	23483	2	Celf5-201	19991	Celf5-201;Celf5-202;Celf5-204;Celf5-203;Celf5-209;Celf5-207;Celf5-206	Celf5;Celf5;Celf5;Celf5;Celf5;Celf5;Celf5	0;0;0;0;0;8089;0	TRUE	FALSE	FALSE	FALSE	FALSE	TRUE	TRUE	FALSE	FALSE	Exon	2	3	319586	ENSMUSG00000034818	mapped to different genes
cg04276865	NA	NA	NA	NA	-0.781519652	NA	Hif1an	Hif1an_Intron	19	44640426	44640475	44640474	44640475	50	+	ACCCAGCCTTGTAAATAAATACTAAATATATATGAACAGAGACGACAGCG	Intron (Gm35460-201/Gm35460-201, intron 5 of 6)	19	44562850	44576274	13425	1	Hif1an-201	77576	NA	NA	NA	TRUE	FALSE	FALSE	FALSE	FALSE	FALSE	TRUE	FALSE	FALSE	Intron	25	31	319594	ENSMUSG00000036450	conserved gene but different region
cg04307172	-0.280805804	NA	NA	NA	NA	NA	Nr1d1	Nr1d1_fiveUTR	11	98775273	98775322	98775321	98775322	50	+	TGGGACAGAGGGCTCTGCGCAGGCGCCAGCAGCCCAGGGTTCCCGGGCCG	Promoter (<=1kb)	11	98767932	98775333	7402	2	Nr1d1-201	11	Nr1d1-201;Nr1d1-202	Nr1d1;Nr1d1	0;-4847	TRUE	FALSE	TRUE	TRUE	FALSE	TRUE	FALSE	FALSE	FALSE	fiveUTR	3	9	217166	ENSMUSG00000020889	conserved gene but different region	11	98775184	98775428	245	*	245	18
cg04317929	-0.040831517	-0.037527598	NA	NA	NA	NA	Lrp1	Lrp1_Exon	10	127582675	127582724	127582723	127582724	50	+	CTTCTATGCACTGACCGGCAGGCTCAGGACAGGTCTGTTCGTCAGAGCCG	Exon (Lrp1-207/Lrp1, exon 2 of 3)	10	127538161	127621148	82988	2	Lrp1-201	38424	Lrp1-201;Lrp1-206;Lrp1-207;Lrp1-204	Lrp1;Lrp1;Lrp1;Lrp1	0;-790;0;0	TRUE	FALSE	FALSE	FALSE	FALSE	TRUE	TRUE	FALSE	FALSE	Exon	8	8	16971	ENSMUSG00000040249	conserved gene and region
cg04318752	0.004064489	NA	NA	NA	NA	NA	Evx2	Evx2_threeUTR	2	74654034	74654083	74654034	74654035	50	+	CGTCCAAGTTACCAAAATGAAAATCGGCAATTGAGATGATAAGAACGTGG	3' UTR	2	74652991	74659557	6567	2	Evx2-201	5474	Evx2-201;Evx2-202	Evx2;Evx2	0;5336	TRUE	FALSE	FALSE	FALSE	TRUE	TRUE	FALSE	FALSE	FALSE	threeUTR	8	35	14029	ENSMUSG00000001815	conserved gene and region
cg04335591	-0.006743704	NA	NA	NA	NA	NA	Btrc	Btrc_Intron	19	45476372	45476421	45476420	45476421	50	-	TAACAATTTCCCAATAAACTCTGACTTGTAATAACGTCGGCAAGAGTCCG	Intron (Btrc-204/Btrc, intron 1 of 2)	19	45363734	45507736	144003	1	Btrc-204	112638	Btrc-204;Btrc-201;Btrc-210;Btrc-202;Btrc-203;Btrc-209	Btrc;Btrc;Btrc;Btrc;Btrc;Btrc	0;0;0;0;0;0	TRUE	FALSE	FALSE	FALSE	FALSE	FALSE	TRUE	FALSE	FALSE	Intron	63	98	12234	ENSMUSG00000025217	conserved gene and region	19	45476406	45476490	85	*	85	8
cg04342828	-0.55161399	NA	NA	NA	NA	NA	Insm1	Insm1_Exon	2	146223690	146223739	146223690	146223691	50	+	CGCCGCCCAGGTGTTCCCCTGCAAGTACTGCCCGGCCACCTTCTACAGCT	Exon (Insm1-201/Insm1, exon 1 of 1)	2	146221921	146225020	3100	1	Insm1-201	1769	Insm1-201	Insm1	0	TRUE	FALSE	FALSE	FALSE	FALSE	TRUE	FALSE	FALSE	FALSE	Exon	2	3	53626	ENSMUSG00000068154	conserved gene and region	2	146221662	146223777	2116	*	2116	283
cg04356548	-0.138924568	NA	NA	NA	NA	NA	Ubn2	Ubn2_fiveUTR	6	38433904	38433953	38433904	38433905	50	-	CGCATGCGCCCGCTCAGCGGCCTGCTTCTATTTATGTGGGGGATCCAACA	Promoter (<=1kb)	6	38433950	38512763	78814	1	Ubn2-205	0	Ubn2-205;Ubn2-201	Ubn2;Ubn2	0;-220	TRUE	FALSE	TRUE	TRUE	FALSE	TRUE	FALSE	FALSE	FALSE	fiveUTR	1	1	320538	ENSMUSG00000038538	conserved gene but different region	6	38433875	38434811	937	*	937	131
cg04398268	NA	NA	NA	-0.148431872	NA	NA	Fam222b	Fam222b_fiveUTR	11	78153930	78153979	78153978	78153979	50	+	AAAGTGCCAGCCAAAAGCATACTCAAGGACTTTGACGGCACCCGAGCCCG	5' UTR	11	78094660	78156700	62041	1	Fam222b-201	59270	Fam222b-201;Fam222b-202;Fam222b-203;Gm12571-201;Traf4-203	Fam222b;Fam222b;Fam222b;Gm12571;Traf4	0;0;0;-4492;11610	TRUE	FALSE	FALSE	TRUE	FALSE	TRUE	FALSE	FALSE	FALSE	fiveUTR	10	21	216971	ENSMUSG00000037750	conserved gene and region
cg04407088	-0.001417651	NA	NA	NA	NA	NA	Nkx2-2	Nkx2-2_Promoter	2	147195193	147195242	147195193	147195194	50	+	CGTGAGTCAAAATATTGGCCATATGTTCAGCGGTAATAAATTGGGTATGA	Promoter (<=1kb)	2	147186305	147194243	7939	2	Nkx2-2-202	-950	Nkx2-2-202;Nkx2-2-204	Nkx2-2;Nkx2-2	0;0	TRUE	FALSE	TRUE	FALSE	FALSE	FALSE	TRUE	FALSE	FALSE	Promoter	3	30	18088	ENSMUSG00000027434	conserved gene and region	2	147194844	147195372	529	*	529	51
cg04422517	NA	NA	NA	NA	0.257808636	NA	Epb41l1	Epb41l1_fiveUTR	2	156493905	156493954	156493905	156493906	50	+	CGTGCTGGTCACCATGACAACAGAGACAGGCCCCGACTCTGAGGTGAAGA	5' UTR	2	156420909	156543214	122306	1	Epb41l1-203	72996	Epb41l1-203;Epb41l1-204;Epb41l1-208;Epb41l1-206;Epb41l1-202;Epb41l1-205;Epb41l1-201	Epb41l1;Epb41l1;Epb41l1;Epb41l1;Epb41l1;Epb41l1;Epb41l1	0;0;0;0;0;0;0	TRUE	FALSE	FALSE	TRUE	FALSE	TRUE	FALSE	FALSE	FALSE	fiveUTR	1	4	13821	ENSMUSG00000027624	conserved gene and region
cg04447890	-0.145956529	NA	NA	NA	NA	NA	Wls	Wls_fiveUTR	3	159839935	159839984	159839935	159839936	50	+	CGCAAAAATGGCTGGGGCAATTATAGAAAACATGAGCACCAAGAAGCTGT	Promoter (<=1kb)	3	159839672	159936023	96352	1	Wls-201	263	Wls-201;Wls-205;Wls-207;Wls-204;Wls-206;Wls-202	Wls;Wls;Wls;Wls;Wls;Wls	0;0;0;0;0;0	TRUE	FALSE	TRUE	TRUE	FALSE	TRUE	FALSE	FALSE	FALSE	fiveUTR	1	3	68151	ENSMUSG00000028173	conserved gene and region
cg04516741	0.02861273	NA	0.043722135	NA	NA	NA	Skor1	Skor1_Intron	9	63139729	63139778	63139729	63139730	50	+	CGCTTAAAGGCAGATGGATCTAACCAAAATTAAAGCAAACTTAGGCATTA	Intron (Skor1-203/Skor1, intron 7 of 8)	9	63138170	63147011	8842	2	Skor1-203	7233	Skor1-203;Skor1-202;Skor1-201	Skor1;Skor1;Skor1	0;0;0	TRUE	FALSE	FALSE	FALSE	FALSE	FALSE	TRUE	FALSE	FALSE	Intron	6	15	207667	ENSMUSG00000022245	conserved gene and region
cg04523259	NA	NA	NA	NA	0.226585915	NA	Sfrp2	Sfrp2_Exon	3	83766716	83766765	83766716	83766717	50	-	CGGCTGCCCAACCTGCTGGGCCACGAGACCATGAAGGAGGTGCTGGAGCA	Promoter (<=1kb)	3	83766321	83774316	7996	1	Sfrp2-201	395	Sfrp2-201;Sfrp2-202;Sfrp2-203	Sfrp2;Sfrp2;Sfrp2	0;0;-88	TRUE	FALSE	TRUE	FALSE	FALSE	TRUE	FALSE	FALSE	FALSE	Exon	4	4	20319	ENSMUSG00000027996	conserved gene and region	3	83766337	83767061	725	*	725	73
cg04567783	NA	0.216396562	0.027475843	0.564529248	0.542079366	0.117288486	Pax6	Pax6_Intron	2	105689960	105690009	105689960	105689961	50	-	CGGACAGTGATTAATGATAGCAGAGCAGAGGGGTTAACACACTTCACTGA	Intron (Pax6-206/Pax6, intron 7 of 12)	2	105668900	105697364	28465	1	Pax6-206	21060	Pax6-206;Pax6-207;Pax6-210;Pax6-208;Pax6-202;Pax6-205;Pax6-225;Pax6-204;Pax6-201;Pax6-203;Pax6-224;Pax6-219;Pax6-221;Pax6-213;Pax6-211;Pax6-222;Pax6-212;Pax6-215;Pax6-223;Pax6-216;Pax6-218	Pax6;Pax6;Pax6;Pax6;Pax6;Pax6;Pax6;Pax6;Pax6;Pax6;Pax6;Pax6;Pax6;Pax6;Pax6;Pax6;Pax6;Pax6;Pax6;Pax6;Pax6	0;0;0;0;0;0;0;0;0;0;0;0;0;0;0;0;0;0;0;0;-2474	TRUE	FALSE	FALSE	FALSE	FALSE	FALSE	TRUE	FALSE	FALSE	Intron	22	78	18508	ENSMUSG00000027168	conserved gene and region	2	105689929	105689961	33	*	33	6
cg04585931	-0.121878579	NA	NA	NA	NA	NA	Foxa2	Foxa2_Intron	2	148036970	148037019	148037018	148037019	50	-	CCTCCCATCCCACGTTGTTGGTTTTCTGTGTGTGGCTTTTGGTGTGAGCG	Intron (9030622O22Rik-203/9030622O22Rik-203, intron 1 of 2)	2	148044240	148045464	1225	2	Foxa2-203	8494	NA	NA	NA	TRUE	FALSE	FALSE	FALSE	FALSE	FALSE	TRUE	FALSE	FALSE	Intron	6	25	15376	ENSMUSG00000037025	mapped to different genes
cg04589802	NA	NA	NA	-0.008518002	NA	NA	4933402J07Rik	4933402J07Rik_Intergenic_downstream	8	87660423	87660472	87660471	87660472	50	-	AAACCCCCCGCTGTATTTTTAATGGGGGCAGTGACTAATTTAGCCCTACG	Distal Intergenic	8	87563853	87589424	25572	1	4933402J07Rik-201	96619	Zfp423-203;Zfp423-202;Zfp423-201	Zfp423;Zfp423;Zfp423	0;0;0	FALSE	TRUE	FALSE	FALSE	FALSE	FALSE	FALSE	FALSE	TRUE	Intergenic_downstream	5	5	330820	ENSMUSG00000069971	mapped to different genes	8	87660067	87660482	416	*	416	27
cg04598984	NA	NA	NA	NA	-0.048251571	NA	Brpf1	Brpf1_Exon	6	113317643	113317692	113317691	113317692	50	+	CAACATCTTCAGCGAGCCGGTCCCTCTGTCTGAGGTAACCGAATTGGACG	Exon (Brpf1-204/Brpf1, exon 6 of 14)	6	113307137	113324857	17721	1	Brpf1-204	10506	Brpf1-204;Brpf1-209;Brpf1-203;Brpf1-202;Brpf1-201;Brpf1-210;Brpf1-208;Brpf1-205;Brpf1-207;Brpf1-206	Brpf1;Brpf1;Brpf1;Brpf1;Brpf1;Brpf1;Brpf1;Brpf1;Brpf1;Brpf1	0;0;0;0;0;0;0;0;0;0	TRUE	FALSE	FALSE	FALSE	FALSE	TRUE	TRUE	FALSE	FALSE	Exon	14	16	78783	ENSMUSG00000001632	conserved gene and region
cg04611179	-0.211168984	NA	NA	NA	NA	NA	Bmi1	Bmi1_Promoter	2	18676838	18676887	18676838	18676839	50	+	CGGACTCCGAGCCATTTTGGAGCCGGTGTCAGTTTCCACTCTGCCTTCAG	Promoter (<=1kb)	2	18677018	18686629	9612	1	Bmi1-201	-131	Bmi1-201;Bmi1-203;Bmi1-206;Bmi1-202;Bmi1-207;Bmi1-204;Bmi1-205;Commd3-212;Commd3-201;Commd3-210;Commd3-205;Commd3-211;Commd3-206;Commd3-203;Commd3-204;Commd3-207;Commd3-202;Commd3-208;Commd3-209	Bmi1;Bmi1;Bmi1;Bmi1;Bmi1;Bmi1;Bmi1;Commd3;Commd3;Commd3;Commd3;Commd3;Commd3;Commd3;Commd3;Commd3;Commd3;Commd3;Commd3	0;-393;-920;0;-3487;-4107;-4220;4454;4415;4405;4403;4402;4315;3180;2877;2753;2491;2414;2189	FALSE	TRUE	TRUE	FALSE	FALSE	FALSE	FALSE	FALSE	FALSE	Promoter	3	6	12151	ENSMUSG00000026739	conserved gene but different region	2	18676145	18676890	746	*	746	96
cg04661107	NA	NA	NA	NA	-0.34929644	0.274779421	Nsfl1c	Nsfl1c_Exon	2	151503141	151503190	151503141	151503142	50	+	CGAGTGACCAAGAGCCCTGGAGAGACCAGTAAACCGAGAGTGAGTATAAG	Exon (Nsfl1c-202/Nsfl1c, exon 5 of 10)	2	151494182	151511310	17129	1	Nsfl1c-202	8959	Nsfl1c-202;Nsfl1c-209;Nsfl1c-204;Nsfl1c-201;Nsfl1c-203;Nsfl1c-205;Nsfl1c-210;Nsfl1c-208;Nsfl1c-206	Nsfl1c;Nsfl1c;Nsfl1c;Nsfl1c;Nsfl1c;Nsfl1c;Nsfl1c;Nsfl1c;Nsfl1c	0;0;8851;0;0;0;0;0;-547	TRUE	FALSE	FALSE	FALSE	FALSE	TRUE	TRUE	FALSE	FALSE	Exon	1	1	386649	ENSMUSG00000027455	conserved gene but different region
cg04665204	-0.036520689	-0.004483815	NA	NA	NA	NA	Bahcc1	Bahcc1_Intron	11	120280710	120280759	120280758	120280759	50	-	GGCAGGCCCATTTGCATAAATCCTCCGAGCTCCTCCAAACACGATTGGCG	Intron (Bahcc1-203/Bahcc1, intron 14 of 27)	11	120232947	120292282	59336	1	Bahcc1-203	47763	Bahcc1-203;Bahcc1-201;Bahcc1-202	Bahcc1;Bahcc1;Bahcc1	0;0;0	TRUE	FALSE	FALSE	FALSE	FALSE	FALSE	TRUE	FALSE	FALSE	Intron	6	11	268515	ENSMUSG00000039741	conserved gene and region	11	120280511	120280767	257	*	257	24
cg04690108	NA	NA	NA	NA	-0.000482123	NA	Sox2	Sox2_Intergenic_downstream	3	34747740	34747789	34747788	34747789	50	-	ACAAAGCCCCTGGGAGAACTCGGGCAAGCTGAACACCTTGGTCAAACACG	Distal Intergenic	3	34650405	34652461	2057	1	Sox2-201	97384	NA	NA	NA	FALSE	TRUE	FALSE	FALSE	FALSE	FALSE	FALSE	FALSE	TRUE	Intergenic_downstream	9	62	20674	ENSMUSG00000074637	mapped to different genes
cg04724146	0.273476912	NA	NA	NA	1.284429824	NA	Hoxd3	Hoxd3_Promoter	2	74711745	74711794	74711745	74711746	50	+	CGAGCTGTATGTGCAAAATCCGCAAGGAATTGCAGTAAATTCCTTTTTGT	Promoter (<=1kb)	2	74711927	74748271	36345	1	Hoxd3-203	-133	Hoxd3-203;Hoxd4-203;Hoxd8-203;Hoxd8-201;Hoxd8-202	Hoxd3;Hoxd4;Hoxd8;Hoxd8;Hoxd8	0;0;0;0;0	TRUE	FALSE	TRUE	FALSE	FALSE	FALSE	TRUE	FALSE	FALSE	Promoter	7	24	15434	ENSMUSG00000079277	mapped to different genes
cg04750593	-0.171719813	NA	NA	NA	NA	NA	Metap1	Metap1_Exon	3	138489273	138489322	138489273	138489274	50	-	CGAGCCCTGGATGCCCAGCTTGATGCAAGTGGGACACTGGAGCTTGGCCT	Promoter (<=1kb)	3	138458956	138489515	30560	2	Metap1-201	193	Metap1-201;Metap1-203;Metap1-204	Metap1;Metap1;Metap1	0;0;0	TRUE	FALSE	TRUE	FALSE	FALSE	TRUE	FALSE	FALSE	FALSE	Exon	4	4	75624	ENSMUSG00000005813	conserved gene and region	3	138488909	138489274	366	*	366	49
cg04765298	-0.045620958	NA	NA	NA	NA	NA	Cdc73	Cdc73_Exon	1	143702495	143702544	143702543	143702544	50	+	CCCAAACAACATAGTTGGTCTTCACATTCTTGGGCCAGGAGAACTCCCCG	Promoter (<=1kb)	1	143598800	143702893	104094	2	Cdc73-201	349	Cdc73-201;Cdc73-206;Cdc73-202	Cdc73;Cdc73;Cdc73	0;0;-295	TRUE	FALSE	TRUE	FALSE	FALSE	TRUE	FALSE	FALSE	FALSE	Exon	2	2	214498	ENSMUSG00000026361	conserved gene and region	1	143702543	143703176	634	*	634	100
cg04795810	NA	-0.025925755	NA	NA	NA	NA	Gm11679	Gm11679_Intergenic_downstream	11	111914062	111914111	111914062	111914063	50	+	CGGCTCTGAAATTTGATTCAGGCACCAGATTATGAATAGATTTAACTAGT	Distal Intergenic	11	112042800	112043578	779	2	Gm11679-201	129467	NA	NA	NA	FALSE	TRUE	FALSE	FALSE	FALSE	FALSE	FALSE	FALSE	TRUE	Intergenic_downstream	4	7	100504331	NA	mapped to different genes
cg04796803	0.000881218	NA	NA	NA	NA	NA	Macrod1	Macrod1_Intron	19	7143782	7143831	7143782	7143783	50	+	CGTGATCGCCAGATTACTCCAAATGCATTTATTACAGGGGTTAGAAGCGG	Intron (Macrod1-201/Macrod1, intron 3 of 10)	19	7056810	7198057	141248	1	Macrod1-201	86972	Macrod1-201	Macrod1	0	TRUE	FALSE	FALSE	FALSE	FALSE	FALSE	TRUE	FALSE	FALSE	Intron	11	11	107227	ENSMUSG00000036278	conserved gene and region	19	7143705	7143789	85	*	85	8
cg04801716	-0.65689167	NA	NA	NA	NA	NA	Cbx6	Cbx6_fiveUTR	15	79834186	79834235	79834186	79834187	50	+	CGCTCGCCCACTGCAGACAGCTCCATCTTGCTCAGCGGCACCCACAGCCC	Promoter (<=1kb)	15	79827837	79834226	6390	2	Cbx6-201	0	Cbx6-203;Cbx6-208;Cbx6-202;Cbx6-201;Cbx6-206;Cbx6-207;Cbx6-204;Cbx6-205;Npcd-201;Npcd-202	Cbx6;Cbx6;Cbx6;Cbx6;Cbx6;Cbx6;Cbx6;Cbx6;Npcd;Npcd	0;0;0;0;0;0;0;0;0;0	TRUE	FALSE	TRUE	TRUE	FALSE	TRUE	FALSE	FALSE	FALSE	fiveUTR	3	4	494448	ENSMUSG00000089715	conserved gene but different region	15	79834018	79834527	510	*	510	64
cg04808014	NA	NA	NA	NA	-0.905416742	NA	Cdk12	Cdk12_Intergenic_downstream	11	98284376	98284425	98284376	98284377	50	+	CGAATTGCCATCTCCTTGAGCTCTCTGTGGAGCAATCTCAGAGAGCAGTA	Distal Intergenic	11	98263502	98268011	4510	1	Cdk12-204	20874	NA	NA	NA	FALSE	TRUE	FALSE	FALSE	FALSE	FALSE	FALSE	FALSE	TRUE	Intergenic_downstream	17	25	69131	ENSMUSG00000003119	conserved gene but different region
cg04812757	NA	NA	0.347872455	NA	NA	NA	Defb41	Defb41_Intergenic_upstream	1	18308020	18308069	18308020	18308021	50	+	CGACTCCAGATTTCAGACTACATAGCCTGGCAGTTTTCTACAAGAACCAA	Distal Intergenic	1	18250980	18265138	14159	2	Defb41-201	-42882	NA	NA	NA	FALSE	TRUE	FALSE	FALSE	FALSE	FALSE	FALSE	FALSE	TRUE	Intergenic_upstream	6	6	77673	ENSMUSG00000067773	mapped to different genes
cg04845649	NA	0.109753818	0.159120743	0.314796802	NA	NA	Hsf4	Hsf4_Exon	8	105270585	105270634	105270585	105270586	50	+	CGCCAAGGAAGTGCTGCCCCAGTATTTCAAGCATAGCAACATGGCGAGCT	Promoter (<=1kb)	8	105269801	105275686	5886	1	Hsf4-205	784	Fbxl8-201;Fbxl8-202;Hsf4-205;Hsf4-201;Hsf4-202;Hsf4-204;Hsf4-203;Hsf4-207;Hsf4-206	Fbxl8;Fbxl8;Hsf4;Hsf4;Hsf4;Hsf4;Hsf4;Hsf4;Hsf4	5937;5903;0;0;0;0;0;0;0	TRUE	FALSE	TRUE	FALSE	FALSE	TRUE	TRUE	FALSE	FALSE	Exon	1	1	26386	ENSMUSG00000033249	conserved gene but different region	8	105270477	105270586	110	*	110	9
cg04860548	NA	NA	NA	NA	0.460452174	NA	Cerkl	Cerkl_Promoter	2	79456957	79457006	79457005	79457006	50	-	TTTGTGGCCAGAAGAAAGTGGCCCATCTGTCGCCAGTTAGAGACTCCGCG	Promoter (<=1kb)	2	79338569	79456785	118217	2	Cerkl-210	-221	Cerkl-210;Neurod1-201	Cerkl;Neurod1	0;0	FALSE	TRUE	TRUE	FALSE	FALSE	FALSE	FALSE	FALSE	FALSE	Promoter	13	15	228094	ENSMUSG00000075256	mapped to different genes	2	79456843	79457022	180	*	180	14
cg04908805	0.138308588	NA	NA	NA	NA	NA	Gas1	Gas1_Intergenic_downstream	13	60173744	60173793	60173792	60173793	50	-	TGTATCAGCACTCGACACAGCTTAAGAGTGTAATTATTTATCTAAGGGCG	Distal Intergenic	13	60175787	60176941	1155	2	Gas1-202	3197	Gas1-201;Gas1-202	Gas1;Gas1	3572;3148	FALSE	TRUE	FALSE	FALSE	FALSE	FALSE	FALSE	FALSE	TRUE	Intergenic_downstream	7	10	14451	ENSMUSG00000052957	conserved gene and region
cg04929868	NA	NA	0.088888146	NA	NA	NA	Hnrnpdl	Hnrnpdl_threeUTR	5	100035684	100035733	100035684	100035685	50	-	CGACCCCCAGAGATAGACGTGGTCAGGGTGACACACGGCCTGCAATGAAG	Promoter (<=1kb)	5	100033577	100036068	2492	2	Hnrnpdl-203	335	Enoph1-202;Enoph1-201;Enoph1-203;Hnrnpdl-203;Hnrnpdl-202;Hnrnpdl-207;Hnrnpdl-201;Hnrnpdl-204;Hnrnpdl-205;Hnrnpdl-206	Enoph1;Enoph1;Enoph1;Hnrnpdl;Hnrnpdl;Hnrnpdl;Hnrnpdl;Hnrnpdl;Hnrnpdl;Hnrnpdl	0;0;0;0;0;0;0;0;0;1390	TRUE	FALSE	TRUE	FALSE	TRUE	TRUE	TRUE	FALSE	FALSE	threeUTR	8	8	50926	ENSMUSG00000029328	conserved gene and region	5	100035645	100035745	101	*	101	9
cg04958293	NA	NA	-0.13072809	NA	NA	NA	Cask	Cask_threeUTR	X	13522053	13522102	13522101	13522102	50	+	CACTACAACTAGGTAGTCTCTAGGGACCATGACCTGCTGACACAAGGCCG	3' UTR	20	13517080	13786030	268951	2	Cask-212	263928	Cask-212;Cask-203;Cask-204;Cask-201;Cask-202;Cask-207	Cask;Cask;Cask;Cask;Cask;Cask	0;0;0;0;0;0	TRUE	FALSE	FALSE	FALSE	TRUE	TRUE	FALSE	FALSE	FALSE	threeUTR	3	9	12361	ENSMUSG00000031012	conserved gene and region
cg04998737	0.421426439	NA	NA	NA	NA	NA	Otp	Otp_Promoter	13	94869015	94869064	94869063	94869064	50	+	GCTCTTCAATGCTGATTATTTTATTTGCAGCCATAATTATATTTCTTTCG	Promoter (6-7kb)	13	94875602	94885130	9529	1	Otp-201	-6538	NA	NA	NA	FALSE	TRUE	TRUE	FALSE	FALSE	FALSE	FALSE	FALSE	FALSE	Promoter	27	34	18420	ENSMUSG00000021685	conserved gene and region	13	94869063	94869234	172	*	172	30
cg05004092	NA	NA	NA	NA	0.466196204	NA	Zfp618	Zfp618_Intron	4	63075669	63075718	63075669	63075670	50	+	CGACACAAATAGAATAGATTATGGAGTGTCAGCATGTAGATAGATTCCGA	Intron (Zfp618-201/Zfp618, intron 3 of 11)	4	62965573	63115748	150176	1	Zfp618-201	110096	Zfp618-201;Zfp618-203;Zfp618-202	Zfp618;Zfp618;Zfp618	0;0;0	TRUE	FALSE	FALSE	FALSE	FALSE	FALSE	TRUE	FALSE	FALSE	Intron	7	12	72701	ENSMUSG00000028358	conserved gene and region
cg05033071	-0.074667384	NA	NA	NA	NA	NA	Foxo6	Foxo6_Exon	4	120286859	120286908	120286907	120286908	50	-	TGCTGTCGCCTTTATCCTTGAAGTAGGGCACGTAACGGACCATCCAGTCG	Promoter (<=1kb)	4	120267079	120287349	20271	2	Foxo6-201	441	Foxo6-201	Foxo6	0	TRUE	FALSE	TRUE	FALSE	FALSE	TRUE	FALSE	FALSE	FALSE	Exon	6	42	329934	ENSMUSG00000052135	conserved gene and region	4	120286820	120288190	1371	*	1371	160
cg05052045	NA	-0.256643616	NA	NA	NA	NA	Cadm1	Cadm1_Intron	9	47533571	47533620	47533619	47533620	50	-	AATATCCCTCATTAATGCCACTTTATATTTACAGTGTGTCACTGGAGACG	Intron (Cadm1-204/Cadm1, intron 1 of 9)	9	47530173	47853385	323213	1	Cadm1-204	3398	Cadm1-204;Cadm1-209;Cadm1-206;Cadm1-202;Cadm1-203;Cadm1-207;Cadm1-205;Cadm1-211;Cadm1-210;Cadm1-208;Cadm1-201	Cadm1;Cadm1;Cadm1;Cadm1;Cadm1;Cadm1;Cadm1;Cadm1;Cadm1;Cadm1;Cadm1	0;0;0;0;0;0;0;0;0;0;0	TRUE	FALSE	FALSE	FALSE	FALSE	FALSE	TRUE	FALSE	FALSE	Intron	39	77	54725	ENSMUSG00000032076	conserved gene and region
cg05108018	NA	NA	NA	NA	0.429286931	NA	Pax2	Pax2_Intergenic_upstream	19	44726466	44726515	44726466	44726467	50	+	CGGTGCGGAAGAATACAAAAAAATTTCATTGAGGAGGATTATAAAAGTTA	Distal Intergenic	19	44756045	44837851	81807	1	Pax2-203	-29530	NA	NA	NA	FALSE	TRUE	FALSE	FALSE	FALSE	FALSE	FALSE	FALSE	TRUE	Intergenic_upstream	101	166	18504	ENSMUSG00000004231	conserved gene and region
cg05109804	NA	0.006381515	NA	NA	NA	NA	Arglu1	Arglu1_Exon	8	8683740	8683789	8683788	8683789	50	-	AGCGTTACCTCTCTAGCTTTTTGTGCGGCAAGCTCAGCTTGTCTCTGTCG	Exon (Arglu1-201/Arglu1, exon 2 of 4)	8	8665075	8690521	25447	2	Arglu1-201	6732	Arglu1-201;Arglu1-204;Arglu1-203;Arglu1-202	Arglu1;Arglu1;Arglu1;Arglu1	0;0;0;0	TRUE	FALSE	FALSE	FALSE	FALSE	TRUE	TRUE	FALSE	FALSE	Exon	4	7	234023	ENSMUSG00000040459	conserved gene and region
cg05111574	NA	NA	NA	NA	-0.160341178	0.182386734	Mllt3	Mllt3_Intron	4	88030440	88030489	88030488	88030489	50	+	CCAATAAAGATTACGGATCAAATGGAAGATAACTACTAACCATTGTGTCG	Intron (Mllt3-201/Mllt3, intron 2 of 10)	4	87769925	88033364	263440	2	Mllt3-201	2875	Mllt3-201;Mllt3-203;Mllt3-205;Mllt3-206	Mllt3;Mllt3;Mllt3;Mllt3	0;0;0;0	TRUE	FALSE	FALSE	FALSE	FALSE	FALSE	TRUE	FALSE	FALSE	Intron	8	13	70122	ENSMUSG00000028496	conserved gene and region
cg05134912	NA	NA	NA	-0.133411734	NA	NA	Wdr7	Wdr7_Intron	18	63894273	63894322	63894273	63894274	50	+	CGCTGACTCTAATGTGACATGTTTATTGCCTTAACTAACAACTCATTAGC	Intron (Wdr7-201/Wdr7, intron 21 of 27)	18	63708685	63989776	281092	1	Wdr7-201	185588	Gm19076-201;Wdr7-201;Wdr7-204	Gm19076;Wdr7;Wdr7	4709;0;0	TRUE	FALSE	FALSE	FALSE	FALSE	FALSE	TRUE	FALSE	FALSE	Intron	8	11	104082	ENSMUSG00000040560	conserved gene and region
cg05141984	NA	NA	NA	NA	-0.767041699	NA	Ebf2	Ebf2_Intron	14	67261940	67261989	67261940	67261941	50	+	CGGGGAGGGATAGAGTCATTAGGTGTGCACTGTGTTTAATATTTGGTCAT	Intron (Ebf2-201/Ebf2, intron 7 of 16)	14	67233292	67429777	196486	1	Ebf2-201	28648	Ebf2-201;Ebf2-203;Ebf2-202	Ebf2;Ebf2;Ebf2	0;0;0	TRUE	FALSE	FALSE	FALSE	FALSE	FALSE	TRUE	FALSE	FALSE	Intron	20	21	13592	ENSMUSG00000022053	conserved gene and region
cg05163400	NA	2.190662476	NA	NA	NA	NA	Cpeb2	Cpeb2_threeUTR	5	43286241	43286290	43286241	43286242	50	+	CGTAGGGGCAACACAGTCTGCTGCTATATAGTGGGGGAAGCGTGCACTTA	3' UTR	5	43233170	43289723	56554	1	Cpeb2-204	53071	Cpeb2-204;Cpeb2-201;Cpeb2-205	Cpeb2;Cpeb2;Cpeb2	0;0;0	TRUE	FALSE	FALSE	FALSE	TRUE	TRUE	FALSE	FALSE	FALSE	threeUTR	5	11	231207	ENSMUSG00000039782	mapped to different genes
cg05165194	NA	0.143149612	NA	NA	NA	NA	Gm17304	Gm17304_Intron	5	106560748	106560797	106560796	106560797	50	+	GCTGCTCGCTCCATGATGAGATGCTAAATGAAAAGCTGGTGCGACACACG	Intron (Gm28050-202/Gm28050-202, intron 1 of 2)	5	106609098	106609201	104	1	Gm17304-201	-48301	NA	NA	NA	TRUE	FALSE	FALSE	FALSE	FALSE	FALSE	TRUE	FALSE	FALSE	Intron	26	35	NA	NA	mapped to different genes
cg05166871	-0.267745135	NA	NA	NA	NA	NA	Skap1	Skap1_Intron	11	96736234	96736283	96736234	96736235	50	-	CGCAGAATTCAAGTTTGAATAGAGCAGGGAAAAGGTGTTTGAAAGGCCTG	Intron (Skap1-204/Skap1, intron 11 of 12)	11	96464593	96758941	294349	1	Skap1-204	271641	Skap1-204;Skap1-203;Skap1-209;Skap1-201	Skap1;Skap1;Skap1;Skap1	0;0;0;0	TRUE	FALSE	FALSE	FALSE	FALSE	FALSE	TRUE	FALSE	FALSE	Intron	40	46	78473	ENSMUSG00000057058	conserved gene and region	11	96736098	96736244	147	*	147	12
cg05170536	NA	-0.015540675	NA	NA	NA	NA	Prdm16	Prdm16_Intron	4	154581737	154581786	154581737	154581738	50	-	CGCAGAAGAGTGCAAAGATTTGTCTTTAGAAAGCACAGTGCTGAAATCTA	Intron (Prdm16-201/Prdm16, intron 1 of 16)	4	154316125	154636866	320742	2	Prdm16-201	55080	Prdm16-201;Prdm16-202;Prdm16-203;Prdm16-204;Prdm16-205;Prdm16-206;Prdm16-210;Prdm16-207;Prdm16-212	Prdm16;Prdm16;Prdm16;Prdm16;Prdm16;Prdm16;Prdm16;Prdm16;Prdm16	0;0;0;0;0;0;0;0;0	TRUE	FALSE	FALSE	FALSE	FALSE	FALSE	TRUE	FALSE	FALSE	Intron	26	32	70673	ENSMUSG00000039410	conserved gene and region
cg05191959	NA	NA	NA	NA	-19.26920373	-3.552708224	Pou2f2	Pou2f2_Promoter	7	25179896	25179945	25179896	25179897	50	-	CGCGAGCCCAGGCGCGCGCCATCCCCGGCTCCCACCTTGTCCCCATGGCA	Promoter (<=1kb)	7	25120618	25179726	59109	2	Pou2f2-208	-219	Pou2f2-208	Pou2f2	0	FALSE	TRUE	TRUE	FALSE	FALSE	FALSE	FALSE	FALSE	FALSE	Promoter	11	29	18987	ENSMUSG00000008496	conserved gene but different region	7	25179573	25180057	485	*	485	61
cg05193512	-0.536543946	NA	NA	NA	NA	NA	Tgfb2	Tgfb2_Exon	1	186706037	186706086	186706037	186706038	50	+	CGTGTCTGCCTTCAACAAAGTGACGTGCTAGGATTACAGTCAGAAGTCCT	Promoter (<=1kb)	1	186622792	186705989	83198	2	Tgfb2-201	-48	Tgfb2-201;Tgfb2-206;Tgfb2-203	Tgfb2;Tgfb2;Tgfb2	0;0;-1704	TRUE	FALSE	TRUE	FALSE	FALSE	TRUE	FALSE	FALSE	FALSE	Exon	2	4	21808	ENSMUSG00000039239	mapped to different genes	1	186705879	186706159	281	*	281	13
cg05203258	NA	NA	NA	NA	0.309639613	NA	Zfhx3	Zfhx3_Intron	8	108823057	108823106	108823057	108823058	50	+	CGAATTATGTCATGTGGTATCCCCTTTGATTTCGACATGCCTCAGTTTGT	Intron (Zfhx3-204/Zfhx3, intron 9 of 15)	8	107942644	108961630	1018987	1	Zfhx3-204	880413	Zfhx3-204;Zfhx3-201	Zfhx3;Zfhx3	0;0	TRUE	FALSE	FALSE	FALSE	FALSE	FALSE	TRUE	FALSE	FALSE	Intron	114	177	11906	ENSMUSG00000038872	conserved gene and region
cg05203725	NA	NA	NA	0.002807508	NA	NA	Aftph	Aftph_threeUTR	11	20696800	20696849	20696848	20696849	50	-	ATCAAGGTTCAGAAGAGTGGAACCTCCACTAGCTTGAAATTCAGTGACCG	3' UTR	11	20685084	20727607	42524	2	Aftph-205	30758	Aftph-205;Aftph-201;Aftph-208;Aftph-209;Aftph-203;Aftph-207;Aftph-206	Aftph;Aftph;Aftph;Aftph;Aftph;Aftph;Aftph	0;0;0;0;-3998;0;0	TRUE	FALSE	FALSE	FALSE	TRUE	TRUE	TRUE	FALSE	FALSE	threeUTR	3	4	216549	ENSMUSG00000049659	conserved gene but different region
cg05314634	NA	NA	NA	NA	-0.679445016	NA	Hdac7	Hdac7_Intron	15	97832378	97832427	97832426	97832427	50	-	TCCCCCAGTGCATTACAGCGGATCACAGAAATGTTCCAGTCTGTGAGTCG	Intron (Hdac7-203/Hdac7, intron 1 of 23)	15	97792666	97844502	51837	2	Hdac7-203	12075	Hdac7-201;Hdac7-203;Hdac7-202;Hdac7-206;Hdac7-204;Hdac7-205;Hdac7-207;Hdac7-213;Hdac7-212	Hdac7;Hdac7;Hdac7;Hdac7;Hdac7;Hdac7;Hdac7;Hdac7;Hdac7	0;0;0;0;0;0;0;0;0	TRUE	FALSE	FALSE	FALSE	FALSE	FALSE	TRUE	FALSE	FALSE	Intron	4	6	56233	ENSMUSG00000022475	conserved gene and region
cg05322294	-0.114541779	NA	NA	NA	NA	NA	Zeb2	Zeb2_Exon	2	45113397	45113446	45113445	45113446	50	-	GGCGGAAAACGGTGCACACCATTCACAGAACTGGAGAACTCCAAGGGGCG	Exon (Zeb2os-201/Zeb2os-201, exon 3 of 3)	2	44983632	45117395	133764	2	Zeb2-212	3949	Zeb2-212;Zeb2-213;Zeb2-201;Zeb2-202;Zeb2-215;Zeb2-214;Zeb2-203;Zeb2-221;Zeb2-220;Zeb2-216;Zeb2-222;Zeb2-208;Zeb2-228;Zeb2-226;Zeb2-209;Zeb2-224;Zeb2-207;Zeb2-219;Zeb2-211;Zeb2-210;Zeb2-205;Zeb2-223;Zeb2-217;Zeb2-225;Zeb2-204;Zeb2-206;Zeb2-230	Zeb2;Zeb2;Zeb2;Zeb2;Zeb2;Zeb2;Zeb2;Zeb2;Zeb2;Zeb2;Zeb2;Zeb2;Zeb2;Zeb2;Zeb2;Zeb2;Zeb2;Zeb2;Zeb2;Zeb2;Zeb2;Zeb2;Zeb2;Zeb2;Zeb2;Zeb2;Zeb2	0;0;0;0;0;0;0;0;0;0;0;0;0;0;0;0;0;0;0;0;0;0;-3321;0;0;0;0	TRUE	FALSE	FALSE	FALSE	FALSE	TRUE	TRUE	FALSE	FALSE	Exon	21	158	24136	ENSMUSG00000026872	mapped to different genes
cg05474883	0.735704208	NA	NA	NA	NA	NA	Hnrnpd	Hnrnpd_threeUTR	5	99962081	99962130	99962129	99962130	50	+	GTTGGAAGAGACCATACCAAACGGCAGCATTCGAGAGCGTGAGCATCTCG	3' UTR	5	99955935	99978938	23004	2	Hnrnpd-211	16808	Hnrnpd-211;Hnrnpd-201;Hnrnpd-203;Hnrnpd-202;Hnrnpd-208;Hnrnpd-209;Hnrnpd-204;Hnrnpd-205;Hnrnpd-206;Hnrnpd-210	Hnrnpd;Hnrnpd;Hnrnpd;Hnrnpd;Hnrnpd;Hnrnpd;Hnrnpd;Hnrnpd;Hnrnpd;Hnrnpd	0;0;0;0;0;0;0;0;4257;0	TRUE	FALSE	FALSE	FALSE	TRUE	TRUE	TRUE	FALSE	FALSE	threeUTR	6	8	11991	ENSMUSG00000000568	conserved gene and region	5	99962102	99962210	109	*	109	11
cg05478327	NA	NA	0.216551457	NA	NA	NA	0610010K14Rik	0610010K14Rik_Intergenic_downstream	11	70234238	70234287	70234286	70234287	50	+	TGCCTTTGGCCTCCATCTTGTGGCAGGCCCAGGGCCCAGGGCGACTTCCG	Downstream (<1kb)	11	70235206	70236196	991	2	0610010K14Rik-211	1909	0610010K14Rik-211;0610010K14Rik-210;0610010K14Rik-205;0610010K14Rik-209;0610010K14Rik-202;0610010K14Rik-204;0610010K14Rik-208;0610010K14Rik-207;0610010K14Rik-203;0610010K14Rik-213;0610010K14Rik-212;0610010K14Rik-206;0610010K14Rik-201;0610010K14Rik-214;Bcl6b-201;Bcl6b-203;Bcl6b-202;Gm21988-201;Gm21988-202;Rnasek-202;Rnasek-201;Rnasek-203	0610010K14Rik;0610010K14Rik;0610010K14Rik;0610010K14Rik;0610010K14Rik;0610010K14Rik;0610010K14Rik;0610010K14Rik;0610010K14Rik;0610010K14Rik;0610010K14Rik;0610010K14Rik;0610010K14Rik;0610010K14Rik;Bcl6b;Bcl6b;Bcl6b;Gm21988;Gm21988;Rnasek;Rnasek;Rnasek	1909;0;0;0;0;0;0;0;0;0;0;0;0;0;-4499;-4561;-4440;0;0;5493;5555;4771	FALSE	TRUE	FALSE	FALSE	FALSE	FALSE	FALSE	FALSE	FALSE	Intergenic_downstream	3	9	104457	ENSMUSG00000020831	mapped to different genes
cg05482254	NA	NA	-0.029953806	NA	NA	NA	Tiparp	Tiparp_Intron	3	65533714	65533763	65533714	65533715	50	+	CGATGTTGTGTTTCCTGGCAACAAGATGCAGATAACGGCATGTTGAGCCT	Intron (Tiparp-201/Tiparp, intron 2 of 5)	3	65528410	65555518	27109	1	Tiparp-201	5304	4931440P22Rik-203;4931440P22Rik-204;4931440P22Rik-201;Tiparp-201;Tiparp-202	4931440P22Rik;4931440P22Rik;4931440P22Rik;Tiparp;Tiparp	-4343;-4501;-4335;0;0	TRUE	FALSE	FALSE	FALSE	FALSE	FALSE	TRUE	FALSE	FALSE	Intron	1	1	99929	ENSMUSG00000034640	conserved gene and region
cg05484434	NA	-0.303009415	NA	NA	NA	NA	Erbb4	Erbb4_Intron	1	69105087	69105136	69105135	69105136	50	+	CGTTTCCTTAATTTGTTTCATCTAAAAGCAATTCACTCAACATCTTGTCG	Intron (Erbb4-201/Erbb4, intron 1 of 27)	1	68032186	69107756	1075571	2	Erbb4-201	2620	Erbb4-201;Erbb4-202;Erbb4-205	Erbb4;Erbb4;Erbb4	0;0;0	TRUE	FALSE	FALSE	FALSE	FALSE	FALSE	TRUE	FALSE	FALSE	Intron	10	13	13869	ENSMUSG00000062209	conserved gene and region
cg05506474	NA	-0.00375836	NA	NA	NA	NA	Fam222b	Fam222b_fiveUTR	11	78153789	78153838	78153837	78153838	50	+	ATAAAAATCTTCCCCAACAGTGTGAAGGTTCCCCAGCGGAAACACGTTCG	5' UTR	11	78094660	78156700	62041	1	Fam222b-201	59129	Fam222b-201;Fam222b-202;Fam222b-203;Gm12571-201;Traf4-203	Fam222b;Fam222b;Fam222b;Gm12571;Traf4	0;0;0;-4351;11751	TRUE	FALSE	FALSE	TRUE	FALSE	TRUE	TRUE	FALSE	FALSE	fiveUTR	10	21	216971	ENSMUSG00000037750	conserved gene and region	11	78153825	78153900	76	*	76	9
cg05513929	NA	0.351270304	NA	NA	NA	NA	Nrxn1	Nrxn1_Exon	17	90162382	90162431	90162430	90162431	50	+	TTCCCGCCAATTATTATGGTTGCTTGGCTATTGAAGATTGTGAGCTGACG	Exon (Nrxn1-202/Nrxn1, exon 19 of 21)	17	90033631	91088907	1055277	2	Nrxn1-202	926476	Nrxn1-202;Nrxn1-207;Nrxn1-216;Nrxn1-204;Nrxn1-217;Nrxn1-209;Nrxn1-201;Nrxn1-213;Nrxn1-206;Nrxn1-223;Nrxn1-219	Nrxn1;Nrxn1;Nrxn1;Nrxn1;Nrxn1;Nrxn1;Nrxn1;Nrxn1;Nrxn1;Nrxn1;Nrxn1	0;0;0;0;0;0;0;0;0;0;0	TRUE	FALSE	FALSE	FALSE	FALSE	TRUE	FALSE	FALSE	FALSE	Exon	22	27	18189	ENSMUSG00000024109	conserved gene but different region
cg05543238	-1.494304964	NA	NA	NA	NA	NA	Gtf2a1	Gtf2a1_Intron	12	91588411	91588460	91588411	91588412	50	-	CGGTGACGTAGGCCTGAAAAGCACCTTCCCATCCTGGCAGAGTCTATATT	Intron (Gtf2a1-201/Gtf2a1, intron 1 of 8)	12	91555262	91590009	34748	2	Gtf2a1-201	1549	Gtf2a1-201;Gtf2a1-202;Gtf2a1-203	Gtf2a1;Gtf2a1;Gtf2a1	0;0;0	TRUE	FALSE	FALSE	FALSE	FALSE	FALSE	TRUE	FALSE	FALSE	Intron	1	1	83602	ENSMUSG00000020962	conserved gene and region	12	91588219	91588418	200	*	200	19
cg05589845	NA	NA	0.573510673	NA	1.136681784	NA	Evx1	Evx1_fiveUTR	6	52313611	52313660	52313659	52313660	50	-	GAAGAGGGCAATGGGGCTTCCTCCCAGAGGCGGTGCGGCACAGAGGAGCG	Promoter (<=1kb)	6	52313498	52318378	4881	1	Evx1-201	113	Evx1-201;Evx1-202	Evx1;Evx1	0;0	TRUE	FALSE	TRUE	TRUE	FALSE	TRUE	TRUE	FALSE	FALSE	fiveUTR	7	19	14028	ENSMUSG00000005503	mapped to different genes	6	52313641	52313750	110	*	110	14
cg05601676	NA	NA	NA	NA	-0.433425521	NA	Nkx2-3	Nkx2-3_Intergenic_downstream	19	43616700	43616749	43616700	43616701	50	-	CGAGCTCCCCATTGCTTCTCAGAGCGGGGGCTTTGTGCAGCAGTCTGCTC	Downstream (<1kb)	19	43612325	43615892	3568	1	Nkx2-3-201	4424	Nkx2-3-201	Nkx2-3	0	FALSE	TRUE	FALSE	FALSE	FALSE	FALSE	FALSE	FALSE	FALSE	Intergenic_downstream	5	6	18089	ENSMUSG00000044220	conserved gene and region	19	43616270	43616905	636	*	636	57
cg05703789	-0.492136388	NA	NA	NA	NA	NA	Kmt5b	Kmt5b_threeUTR	19	3807266	3807315	3807266	3807267	50	+	CGCCTGCTCCTGTTATCAATAGCAAATATGGACTCAGAGAAACAGATAAA	3' UTR	19	3767421	3808829	41409	1	Kmt5b-202	39845	Kmt5b-202;Kmt5b-205;Kmt5b-207;Kmt5b-206;Kmt5b-208;Kmt5b-203;Kmt5b-204;Kmt5b-201;Kmt5b-221;Kmt5b-210;Kmt5b-213;Kmt5b-216;Kmt5b-219;Kmt5b-220;Kmt5b-218;Kmt5b-212	Kmt5b;Kmt5b;Kmt5b;Kmt5b;Kmt5b;Kmt5b;Kmt5b;Kmt5b;Kmt5b;Kmt5b;Kmt5b;Kmt5b;Kmt5b;Kmt5b;Kmt5b;Kmt5b	0;0;0;0;0;0;0;0;0;0;0;0;0;5193;0;0	TRUE	FALSE	FALSE	FALSE	TRUE	TRUE	TRUE	FALSE	FALSE	threeUTR	2	3	225888	ENSMUSG00000045098	conserved gene and region
cg05759182	-0.062013302	NA	NA	NA	NA	NA	Sfswap	Sfswap_Exon	5	129501543	129501592	129501591	129501592	50	+	ACAGGGACAGCACCTCATCCCCTGGATGGGGGACCACAAGATCCTCATCG	Promoter (<=1kb)	5	129501221	129571384	70164	1	Sfswap-201	322	Sfswap-201;Sfswap-204;Sfswap-212;Sfswap-213;Sfswap-214;Sfswap-208;Sfswap-203;Sfswap-215	Sfswap;Sfswap;Sfswap;Sfswap;Sfswap;Sfswap;Sfswap;Sfswap	0;0;0;0;0;0;0;-2749	TRUE	FALSE	TRUE	FALSE	FALSE	TRUE	FALSE	FALSE	FALSE	Exon	4	5	231769	ENSMUSG00000029439	conserved gene and region	5	129501591	129502227	637	*	637	65
cg05781245	0.050267016	NA	NA	NA	NA	NA	Ube2o	Ube2o_Exon	11	116545075	116545124	116545075	116545076	50	+	CGCAGTTTTTTTCTGGACATTCCCAGGCAATCTTGGCTGGCTCTACCTTG	Exon (Ube2o-201/Ube2o, exon 8 of 18)	11	116537740	116581447	43708	2	Ube2o-201	36323	Ube2o-202;Ube2o-201;Ube2o-203	Ube2o;Ube2o;Ube2o	-1058;0;3717	TRUE	FALSE	FALSE	FALSE	FALSE	TRUE	FALSE	FALSE	FALSE	Exon	2	2	217342	ENSMUSG00000020802	conserved gene and region
cg05798256	NA	NA	NA	NA	0.003457808	NA	Pax6	Pax6_Exon	2	105683872	105683921	105683872	105683873	50	+	CGGCCACTGCCGGACTCCACCCGGCAGAAGATTGTAGAGCTAGCTCACAG	Exon (Pax6-206/Pax6, exon 4 of 13)	2	105668900	105697364	28465	1	Pax6-206	14972	Pax6-206;Pax6-207;Pax6-210;Pax6-214;Pax6-208;Pax6-202;Pax6-205;Pax6-225;Pax6-204;Pax6-201;Pax6-203;Pax6-224;Pax6-219;Pax6-221;Pax6-213;Pax6-211;Pax6-222;Pax6-212;Pax6-215;Pax6-223;Pax6-209;Pax6-216	Pax6;Pax6;Pax6;Pax6;Pax6;Pax6;Pax6;Pax6;Pax6;Pax6;Pax6;Pax6;Pax6;Pax6;Pax6;Pax6;Pax6;Pax6;Pax6;Pax6;Pax6;Pax6	0;0;0;0;0;0;0;0;0;0;0;0;0;0;0;0;0;0;0;0;0;0	TRUE	FALSE	FALSE	FALSE	FALSE	TRUE	TRUE	FALSE	FALSE	Exon	31	78	18508	ENSMUSG00000027168	conserved gene but different region	2	105683814	105684069	256	*	256	19
cg05809127	NA	NA	-0.697501132	NA	NA	NA	Rbm39	Rbm39_threeUTR	2	156167673	156167722	156167721	156167722	50	+	ATGTTTAAAAACCTTAATTTGATGCTATGAGGCAACCCAATCTTTCCTCG	3' UTR	2	156147239	156180238	33000	2	Rbm39-203	12516	Rbm39-203;Rbm39-217;Rbm39-215;Rbm39-201;Rbm39-225;Rbm39-223;Rbm39-220;Rbm39-204;Rbm39-209;Rbm39-207;Rbm39-206;Rbm39-216;Rbm39-221;Rbm39-213;Rbm39-214	Rbm39;Rbm39;Rbm39;Rbm39;Rbm39;Rbm39;Rbm39;Rbm39;Rbm39;Rbm39;Rbm39;Rbm39;Rbm39;Rbm39;Rbm39	0;0;0;0;0;0;-2750;0;-2461;0;0;0;0;0;0	TRUE	FALSE	FALSE	FALSE	TRUE	TRUE	TRUE	FALSE	FALSE	threeUTR	11	13	170791	ENSMUSG00000027620	conserved gene and region
cg05811474	NA	NA	NA	NA	0.086865716	NA	Tfap2a	Tfap2a_Intergenic_downstream	13	40709078	40709127	40709126	40709127	50	+	ATTGAAATGGCGTGTGCCAGGGCTGATGGGAGCCAGCGAGGGACAAAGCG	Distal Intergenic	13	40716724	40728944	12221	2	Tfap2a-209	19817	NA	NA	NA	FALSE	TRUE	FALSE	FALSE	FALSE	FALSE	FALSE	FALSE	TRUE	Intergenic_downstream	15	57	21418	ENSMUSG00000021359	mapped to different genes	13	40709088	40709361	274	*	274	22
cg05825073	NA	NA	0.345484698	NA	NA	NA	Evx1	Evx1_fiveUTR	6	52313452	52313501	52313452	52313453	50	+	CGAGGCCCACACCTGGCGCATCACTGCCGAGCCATTAGCTGCGGGTTTCC	Promoter (<=1kb)	6	52313498	52318378	4881	1	Evx1-201	0	Evx1-201;Evx1-202	Evx1;Evx1	0;0	TRUE	FALSE	TRUE	TRUE	FALSE	TRUE	FALSE	FALSE	FALSE	fiveUTR	7	19	14028	ENSMUSG00000005503	mapped to different genes	6	52313448	52313581	134	*	134	12
cg05850818	NA	NA	NA	0.086458508	NA	NA	Smg6	Smg6_Intron	11	75047385	75047434	75047433	75047434	50	+	TGCCCAGACCTTCGCATTCTGATGCTATATATCTTCCTAATTGTAGCTCG	Intron (Smg6-201/Smg6, intron 12 of 18)	11	74925823	75164448	238626	1	Smg6-201	121562	Smg6-201;Smg6-202;Smg6-204	Smg6;Smg6;Smg6	0;0;0	TRUE	FALSE	FALSE	FALSE	FALSE	FALSE	TRUE	FALSE	FALSE	Intron	31	34	103677	ENSMUSG00000038290	conserved gene and region
cg05874561	NA	NA	NA	NA	-0.419804442	NA	Sfrp2	Sfrp2_Exon	3	83766700	83766749	83766700	83766701	50	-	CGAATACCAGAACATGCGGCTGCCCAACCTGCTGGGCCACGAGACCATGA	Promoter (<=1kb)	3	83766321	83774316	7996	1	Sfrp2-201	379	Sfrp2-201;Sfrp2-202;Sfrp2-203	Sfrp2;Sfrp2;Sfrp2	0;0;-104	TRUE	FALSE	TRUE	FALSE	FALSE	TRUE	FALSE	FALSE	FALSE	Exon	4	4	20319	ENSMUSG00000027996	conserved gene and region	3	83766337	83767061	725	*	725	73
cg05895577	NA	NA	0.296116324	NA	NA	NA	Bclaf1	Bclaf1_Intron	10	20327093	20327142	20327093	20327094	50	+	CGATCTGAACAGCTCTTACTTTATATAGAGCTGAAAATGCCCAGTGATGT	Intron (Bclaf1-202/Bclaf1, intron 6 of 11)	10	20312469	20342501	30033	1	Bclaf1-202	14624	Bclaf1-202;Bclaf1-204;Bclaf1-201;Bclaf1-205;Bclaf1-208;Bclaf1-203;Bclaf1-210;Bclaf1-207;Bclaf1-209	Bclaf1;Bclaf1;Bclaf1;Bclaf1;Bclaf1;Bclaf1;Bclaf1;Bclaf1;Bclaf1	0;0;0;14565;0;0;0;0;0	TRUE	FALSE	FALSE	FALSE	FALSE	FALSE	TRUE	FALSE	FALSE	Intron	2	7	72567	ENSMUSG00000037608	conserved gene and region
cg05933505	-0.239681014	-0.14219284	-0.265140852	-0.280201443	NA	NA	Wasf2	Wasf2_Exon	4	133176484	133176533	133176532	133176533	50	-	TGCCGTTAGTAACGAGGAACATCGAGCCAAGGCACCTGTGCCGTCAGACG	Exon (Wasf2-201/Wasf2, exon 2 of 9)	4	133130505	133199756	69252	1	Wasf2-201	45979	Wasf2-201;Wasf2-206;Wasf2-204;Wasf2-203;Wasf2-202	Wasf2;Wasf2;Wasf2;Wasf2;Wasf2	0;0;0;0;0	TRUE	FALSE	FALSE	FALSE	FALSE	TRUE	FALSE	FALSE	FALSE	Exon	2	5	242687	ENSMUSG00000028868	conserved gene and region
cg05934936	NA	NA	NA	NA	-0.381426499	NA	Zeb2	Zeb2_threeUTR	2	45097134	45097183	45097182	45097183	50	+	AAAACCCTGAAACTGATGAACAGTTATGTCAAGTCGATTTTGCACCATCG	3' UTR	2	44983632	45117395	133764	2	Zeb2-212	20212	Zeb2-212;Zeb2-213;Zeb2-201;Zeb2-202;Zeb2-215;Zeb2-214;Zeb2-203;Zeb2-221;Zeb2-220;Zeb2-216;Zeb2-222;Zeb2-208;Zeb2-228;Zeb2-226;Zeb2-209;Zeb2-224;Zeb2-207;Zeb2-219;Zeb2-211	Zeb2;Zeb2;Zeb2;Zeb2;Zeb2;Zeb2;Zeb2;Zeb2;Zeb2;Zeb2;Zeb2;Zeb2;Zeb2;Zeb2;Zeb2;Zeb2;Zeb2;Zeb2;Zeb2	0;0;0;0;0;0;0;0;0;0;0;0;0;0;0;0;0;0;0	TRUE	FALSE	FALSE	FALSE	TRUE	TRUE	TRUE	FALSE	FALSE	threeUTR	10	158	24136	ENSMUSG00000026872	conserved gene but different region
cg05960393	NA	NA	NA	NA	0.202755086	NA	Lmx1b	Lmx1b_Intron	2	33616842	33616891	33616890	33616891	50	+	AGATAAAATGATTAAAAACTGCCAAGCGGGCCTGGCAATCACTCGCTCCG	Intron (Lmx1b-201/Lmx1b, intron 2 of 7)	2	33560965	33640608	79644	2	Lmx1b-201	23717	Lmx1b-201;Lmx1b-203;Lmx1b-204;Lmx1b-202	Lmx1b;Lmx1b;Lmx1b;Lmx1b	0;0;0;0	TRUE	FALSE	FALSE	FALSE	FALSE	FALSE	TRUE	FALSE	FALSE	Intron	18	26	16917	ENSMUSG00000038765	conserved gene and region	2	33616825	33617025	201	*	201	14
cg05977669	NA	NA	NA	NA	1.592910987	NA	Hoxa11	Hoxa11_Exon	6	52245979	52246028	52246027	52246028	50	+	TTGTAGCCACCTCAGGGGAAGCAACAGATCGTCACTCGGTGTTCTCACCG	Promoter (<=1kb)	6	52242106	52245810	3705	2	Hoxa11-201	-169	Hoxa11-201;Hoxa11-202	Hoxa11;Hoxa11	0;0	TRUE	FALSE	TRUE	FALSE	FALSE	TRUE	TRUE	FALSE	FALSE	Exon	15	18	15396	ENSMUSG00000038210	mapped to different genes	6	52246008	52246200	193	*	193	16
cg06001099	NA	NA	NA	NA	-0.007306688	NA	Cacnb3	Cacnb3_Exon	15	98643383	98643432	98643383	98643384	50	+	CGCCACCTGGAGGAGGACTATGCAGATGCCTACCAGGACCTGTACCAGCC	Exon (Cacnb3-202/Cacnb3, exon 13 of 13)	15	98632376	98644529	12154	1	Cacnb3-202	11007	Cacnb3-203;Cacnb3-207;Cacnb3-202;Cacnb3-201;Cacnb3-206;Cacnb3-205;Ddx23-201;Ddx23-204;Ddx23-203	Cacnb3;Cacnb3;Cacnb3;Cacnb3;Cacnb3;Cacnb3;Ddx23;Ddx23;Ddx23	0;0;0;0;0;0;0;0;0	TRUE	FALSE	FALSE	FALSE	FALSE	TRUE	FALSE	FALSE	FALSE	Exon	1	3	12297	ENSMUSG00000003352	conserved gene but different region
cg06045699	NA	NA	NA	NA	-0.114998472	NA	Hoxa2	Hoxa2_fiveUTR	6	52164814	52164863	52164814	52164815	50	+	CGCTACTATTAAACTATTGAATTCATGGAGACAAGGTTGAAATTGGACCG	Promoter (<=1kb)	6	52162417	52164831	2415	2	Hoxa2-201	0	Gm28308-201;Hoxa2-201;Hoxa3-201	Gm28308;Hoxa2;Hoxa3	0;0;0	TRUE	FALSE	TRUE	TRUE	FALSE	TRUE	TRUE	FALSE	FALSE	fiveUTR	3	3	15399	ENSMUSG00000014704	conserved gene and region
cg06129152	0.090715037	NA	NA	NA	NA	NA	Gm18602	Gm18602_Intron	8	87214989	87215038	87215037	87215038	50	+	TGTACACGCAAAATTAACACAAATCAAAACTGCTGCTGTTCTTTGATCCG	Intron (Gm27169-201/Gm27169-201, intron 1 of 4)	8	87051397	87052247	851	2	Gm18602-201	-162742	NA	NA	NA	TRUE	FALSE	FALSE	FALSE	FALSE	FALSE	TRUE	FALSE	FALSE	Intron	2	2	100417420	NA	mapped to different genes
cg06156376	1.897343859	NA	NA	NA	NA	NA	Rsrc1	Rsrc1_fiveUTR	3	66981509	66981558	66981557	66981558	50	-	CACTTTCTGGTCAAAAGACTTGGAGACGAACGCCGTAAGTTCTTCCATCG	Promoter (<=1kb)	3	66981390	67356559	375170	1	Rsrc1-206	119	Rsrc1-206;Rsrc1-207;Rsrc1-203;Rsrc1-208;Rsrc1-202;Rsrc1-201;Rsrc1-209;Rsrc1-205;Rsrc1-204;Shox2-203;Shox2-201;Shox2-202;Shox2-204;Shox2-205	Rsrc1;Rsrc1;Rsrc1;Rsrc1;Rsrc1;Rsrc1;Rsrc1;Rsrc1;Rsrc1;Shox2;Shox2;Shox2;Shox2;Shox2	0;-4112;0;0;0;0;0;0;-4420;0;0;0;0;0	TRUE	FALSE	TRUE	TRUE	FALSE	TRUE	TRUE	FALSE	FALSE	fiveUTR	3	37	66880	ENSMUSG00000034544	conserved gene and region	3	66981535	66981613	79	*	79	13
cg06198114	NA	-0.402939578	NA	NA	NA	NA	Mapkap1	Mapkap1_Intron	2	34453490	34453539	34453490	34453491	50	+	CGCTGTCTTTCCTGACAGCAGTTAAAAAGTATGGTTATAGTAATCAAATT	Intron (Mapkap1-210/Mapkap1, intron 4 of 4)	2	34406771	34497716	90946	1	Mapkap1-210	46719	Mapkap1-210;Mapkap1-204;Mapkap1-211;Mapkap1-202;Mapkap1-201;Mapkap1-209;Mapkap1-203;Mapkap1-207;Mapkap1-206	Mapkap1;Mapkap1;Mapkap1;Mapkap1;Mapkap1;Mapkap1;Mapkap1;Mapkap1;Mapkap1	0;0;0;0;0;0;0;0;0	TRUE	FALSE	FALSE	FALSE	FALSE	FALSE	TRUE	FALSE	FALSE	Intron	50	59	227743	ENSMUSG00000038696	conserved gene and region
cg06202504	NA	0.133166647	NA	NA	NA	NA	Nrxn3	Nrxn3_Intron	12	89352682	89352731	89352730	89352731	50	-	TTTGCTCCCACTTTTCTGTTGCGGTTGACGACACATGACAAACCTAACCG	Intron (Nrxn3-213/Nrxn3, intron 6 of 18)	12	88722986	90332878	1609893	1	Nrxn3-213	629696	Nrxn3-213;Nrxn3-208;Nrxn3-205;Nrxn3-201;Nrxn3-210	Nrxn3;Nrxn3;Nrxn3;Nrxn3;Nrxn3	0;0;0;0;0	TRUE	FALSE	FALSE	FALSE	FALSE	FALSE	TRUE	FALSE	FALSE	Intron	13	39	18191	ENSMUSG00000066392	conserved gene and region
cg06230736	1.009268298	NA	NA	NA	NA	NA	Gata3	Gata3_fiveUTR	2	9878542	9878591	9878590	9878591	50	-	ATGCATTCTTTCTGAAAGTATCAAGACGGCGCCAGGCAGCTCAGTGTTCG	Promoter (<=1kb)	2	9857078	9878600	21523	2	Gata3-201	9	4930412O13Rik-201;4930412O13Rik-202;9230102O04Rik-202;9230102O04Rik-201;Gata3-201;Gata3-205;Gata3-206;Gata3-202;Gata3-204;Gata3-203	4930412O13Rik;4930412O13Rik;9230102O04Rik;9230102O04Rik;Gata3;Gata3;Gata3;Gata3;Gata3;Gata3	-2661;-4045;10949;5402;0;0;-3143;0;0;0	TRUE	FALSE	TRUE	TRUE	FALSE	TRUE	TRUE	FALSE	FALSE	fiveUTR	5	21	14462	ENSMUSG00000015619	conserved gene and region	2	9878568	9878714	147	*	147	12
cg06237677	NA	0.154974848	NA	NA	NA	NA	Gm6877	Gm6877_Intergenic_downstream	8	33138987	33139036	33138987	33138988	50	-	CGTTCCCACTGGCATCTGTAAATTAGCCTCTGGTAATTATCTGTGTGGGA	Distal Intergenic	8	33191196	33192296	1101	2	Gm6877-201	53309	NA	NA	NA	FALSE	TRUE	FALSE	FALSE	FALSE	FALSE	FALSE	FALSE	TRUE	Intergenic_downstream	1	1	628412	NA	mapped to different genes
cg06245192	NA	-0.183596913	NA	-0.200948543	NA	NA	Sox21	Sox21_Intergenic_downstream	14	118194473	118194522	118194473	118194474	50	+	CGTGAAATTAAATGTTTGACAGAGTGAGAAAAATATACAGACTTTGGAGA	Distal Intergenic	14	118233232	118237030	3799	2	Sox21-201	42508	NA	NA	NA	FALSE	TRUE	FALSE	FALSE	FALSE	FALSE	FALSE	FALSE	TRUE	Intergenic_downstream	26	27	223227	ENSMUSG00000061517	mapped to different genes
cg06358839	-0.455760689	NA	NA	NA	NA	NA	Nr2f2	Nr2f2_Intergenic_downstream	7	70346524	70346573	70346524	70346525	50	-	CGCTGGGAGCAATAAGTCCATTTAAAAGCCCTTTATTTAAAAGGAACAAA	Distal Intergenic	7	70353074	70355237	2164	2	Nr2f2-203	8713	NA	NA	NA	FALSE	TRUE	FALSE	FALSE	FALSE	FALSE	FALSE	FALSE	TRUE	Intergenic_downstream	19	69	11819	ENSMUSG00000030551	mapped to different genes
cg06363348	0.039309434	NA	NA	NA	NA	NA	Grm8	Grm8_Exon	6	28125645	28125694	28125693	28125694	50	-	TGATGGACACGGAGCTTGCTGCAGCACCTATGACGCCAGAAATCTTGTCG	Exon (Grm8-202/Grm8, exon 2 of 11)	6	27275119	28134545	859427	2	Grm8-202	8851	Grm8-202;Grm8-203;Grm8-201;Grm8-204;Grm8-206;Grm8-205	Grm8;Grm8;Grm8;Grm8;Grm8;Grm8	0;0;0;0;0;7435	TRUE	FALSE	FALSE	FALSE	FALSE	TRUE	FALSE	FALSE	FALSE	Exon	5	5	14823	ENSMUSG00000024211	conserved gene and region
cg06438063	NA	-0.097426853	NA	NA	NA	NA	Bicd1	Bicd1_threeUTR	6	149520507	149520556	149520507	149520508	50	+	CGGCTCAGCAAGGAAAAAAGGTTAACCGTGGCTCCACCAGGTAAACATTT	3' UTR	6	149408984	149563329	154346	1	Bicd1-202	111523	Bicd1-202;Bicd1-203;Bicd1-201;Bicd1-207;Bicd1-208;Bicd1-206	Bicd1;Bicd1;Bicd1;Bicd1;Bicd1;Bicd1	0;0;0;0;0;0	TRUE	FALSE	FALSE	FALSE	TRUE	TRUE	TRUE	FALSE	FALSE	threeUTR	3	6	12121	ENSMUSG00000003452	conserved gene and region
cg06454786	NA	NA	NA	NA	-0.304471894	NA	Cntln	Cntln_Intron	4	84988091	84988140	84988091	84988092	50	-	CGTAGCTTTCTTGTCAGTTTTTAATAATTACAGGCTATTATGGAATGCAT	Intron (Cntln-201/Cntln, intron 8 of 25)	4	84884309	85131921	247613	1	Cntln-201	103782	Cntln-201;Cntln-204	Cntln;Cntln	0;0	TRUE	FALSE	FALSE	FALSE	FALSE	FALSE	TRUE	FALSE	FALSE	Intron	23	25	338349	ENSMUSG00000038070	conserved gene and region
cg06475639	NA	NA	0.865316842	NA	NA	NA	Mtmr3	Mtmr3_threeUTR	11	4481084	4481133	4481132	4481133	50	-	TAAGAGCTGCAAGCATTTATTCACACTGTACATCAGACCCAAGAAACCCG	3' UTR	11	4480868	4594815	113948	2	Mtmr3-202	113682	Mtmr3-202;Mtmr3-207;Mtmr3-201;Mtmr3-203;Mtmr3-205;Mtmr3-204	Mtmr3;Mtmr3;Mtmr3;Mtmr3;Mtmr3;Mtmr3	0;0;0;0;0;0	TRUE	FALSE	FALSE	FALSE	TRUE	TRUE	FALSE	FALSE	FALSE	threeUTR	1	4	74302	ENSMUSG00000034354	mapped to different genes
cg06537244	-0.211495807	NA	NA	NA	NA	NA	Zfr	Zfr_fiveUTR	15	12117871	12117920	12117871	12117872	50	+	CGGGTGAGAGTTCAGAGTTCAGCAGCAGCAGCCCGAGCCCATGATTCCCA	Promoter (<=1kb)	15	12117831	12185683	67853	1	Zfr-201	40	Zfr-201;Zfr-210;Zfr-203;Zfr-204;Zfr-202	Zfr;Zfr;Zfr;Zfr;Zfr	0;0;0;0;0	TRUE	FALSE	TRUE	TRUE	FALSE	TRUE	FALSE	FALSE	FALSE	fiveUTR	1	12	22763	ENSMUSG00000022201	conserved gene and region	15	12117482	12117905	424	*	424	42
cg06540073	NA	NA	0.148304511	NA	NA	NA	Atxn7l1	Atxn7l1_Intron	12	33345227	33345276	33345275	33345276	50	+	CAGTAAATTGTATTTATAGGCACTCACAGGCGGTTCTAAAGCCTGCTACG	Intron (Atxn7l1-212/Atxn7l1, intron 6 of 12)	12	33147754	33373030	225277	1	Atxn7l1-212	197473	Atxn7l1-212;Atxn7l1-204;Atxn7l1-202;Atxn7l1-207;Atxn7l1-213;Atxn7l1-205	Atxn7l1;Atxn7l1;Atxn7l1;Atxn7l1;Atxn7l1;Atxn7l1	0;0;0;0;0;0	TRUE	FALSE	FALSE	FALSE	FALSE	FALSE	TRUE	FALSE	FALSE	Intron	7	24	380753	ENSMUSG00000020564	conserved gene and region	12	33345257	33345411	155	*	155	14
cg06545110	-0.120642669	-0.578258498	NA	NA	NA	NA	Dysf	Dysf_Intron	6	84135176	84135225	84135176	84135177	50	+	CGAGCTTGGAGCTGATGGTATCACAGCCAGACGGTTTCATTAAATGCACA	Intron (Dysf-204/Dysf, intron 32 of 54)	6	84008590	84211060	202471	1	Dysf-204	126586	Dysf-204;Dysf-205;Dysf-213;Dysf-215;Dysf-210;Dysf-211;Dysf-212;Dysf-214;Dysf-216;Dysf-202;Dysf-203;Dysf-201	Dysf;Dysf;Dysf;Dysf;Dysf;Dysf;Dysf;Dysf;Dysf;Dysf;Dysf;Dysf	0;0;0;0;0;0;0;0;0;0;0;0	TRUE	FALSE	FALSE	FALSE	FALSE	FALSE	TRUE	FALSE	FALSE	Intron	13	15	26903	ENSMUSG00000033788	conserved gene and region	6	84135100	84135232	133	*	133	10
cg06570740	-0.059827764	NA	NA	NA	NA	NA	Spen	Spen_Exon	4	141522036	141522085	141522084	141522085	50	-	TACAAAATACCTGCCTACAGAAACCTTGGAACTTACCCATCAAGTCTCCG	Exon (Spen-201/Spen, exon 2 of 15)	4	141467890	141538449	70560	2	Spen-201	16364	Spen-201;Spen-202;Spen-205	Spen;Spen;Spen	0;0;0	TRUE	FALSE	FALSE	FALSE	FALSE	TRUE	TRUE	FALSE	FALSE	Exon	17	19	56381	ENSMUSG00000040761	conserved gene and region
cg06590610	NA	NA	NA	0.28803024	NA	NA	Ikzf1	Ikzf1_Exon	11	11748397	11748446	11748397	11748398	50	+	CGAATGCTTGATGCCTCGGGAGAGAAAATGAATGGCTCCCACAGGGACCA	Exon (Ikzf1-203/Ikzf1, exon 5 of 9)	11	11685003	11754083	69081	1	Ikzf1-205	63394	Ikzf1-205;Ikzf1-203;Ikzf1-204;Ikzf1-202;Ikzf1-201	Ikzf1;Ikzf1;Ikzf1;Ikzf1;Ikzf1	0;0;0;0;0	TRUE	FALSE	FALSE	FALSE	FALSE	TRUE	TRUE	FALSE	FALSE	Exon	4	15	22778	ENSMUSG00000018654	conserved gene and region
cg06603975	NA	NA	NA	NA	0.606859065	NA	Dlx1	Dlx1_fiveUTR	2	71528278	71528327	71528278	71528279	50	+	CGTATGAAAATTAAACATCAGTGTTATGCTAATGGGGCGCCTTCAGCTGC	Promoter (<=1kb)	2	71528113	71533980	5868	1	Dlx1-201	165	Dlx1-201;Dlx1-202;Dlx1-205;Dlx1-204;Dlx1-203;Dlx1-206;Metap1d-201;Metap1d-205;Metap1d-203	Dlx1;Dlx1;Dlx1;Dlx1;Dlx1;Dlx1;Metap1d;Metap1d;Metap1d	0;0;0;0;0;-2453;0;0;0	TRUE	FALSE	TRUE	TRUE	FALSE	TRUE	TRUE	FALSE	FALSE	fiveUTR	12	36	13390	ENSMUSG00000041911	conserved gene but different region
cg06606386	NA	NA	NA	NA	0.373797319	NA	Nanos3	Nanos3_Exon	8	84208522	84208571	84208522	84208523	50	+	CGGCTGGGGTTCCTGGGGATGGGATTTGCTTCCTGTCACAAATCACATTG	Exon (Mir23a-201/Mir23a-201, exon 1 of 1)	8	84173731	84185217	11487	2	Nanos3-203	-23305	Zswim4-201	Zswim4	28484	TRUE	FALSE	FALSE	FALSE	FALSE	TRUE	FALSE	FALSE	FALSE	Exon	2	2	244551	ENSMUSG00000056155	mapped to different genes
cg06620993	NA	NA	NA	NA	-0.509334231	NA	Sh3pxd2a	Sh3pxd2a_Exon	19	47314077	47314126	47314125	47314126	50	+	GGAGGCTCAGCTCCGAGTTCTCCTGCTTCTTATAGTTGGACACCACCACG	Exon (Sh3pxd2a-201/Sh3pxd2a, exon 8 of 15)	19	47260174	47464401	204228	2	Sh3pxd2a-201	150275	Sh3pxd2a-201;Sh3pxd2a-203;Sh3pxd2a-202	Sh3pxd2a;Sh3pxd2a;Sh3pxd2a	0;0;0	TRUE	FALSE	FALSE	FALSE	FALSE	TRUE	FALSE	FALSE	FALSE	Exon	4	6	14218	ENSMUSG00000053617	conserved gene and region	19	47313990	47314398	409	*	409	35
cg06637963	-0.384005452	NA	NA	NA	NA	NA	Zeb1	Zeb1_fiveUTR	18	5591886	5591935	5591934	5591935	50	+	CATTTAGACACAAGCGAGAGGATCATGGCGGATGGCCCCAGGTGTAAGCG	Promoter (<=1kb)	18	5591891	5766533	174643	1	Zeb1-202	0	Zeb1-212;Zeb1-201;Zeb1-204;Zeb1-202;Zeb1-209;Zeb1-206;Zeb1-208;Zeb1-205;Zeb1-211;Zeb1-207	Zeb1;Zeb1;Zeb1;Zeb1;Zeb1;Zeb1;Zeb1;Zeb1;Zeb1;Zeb1	0;0;0;0;0;0;0;0;0;0	TRUE	FALSE	TRUE	TRUE	FALSE	TRUE	TRUE	FALSE	FALSE	fiveUTR	3	7	21417	ENSMUSG00000024238	mapped to different genes	18	5591882	5592967	1086	*	1086	159
cg06699148	-0.833293223	NA	NA	NA	NA	NA	Son	Son_Exon	16	91656381	91656430	91656381	91656382	50	-	CGACGACAGCGCTGGAATCCTATAATACGGTAGCACAGGAGCTGCCTACT	Exon (Son-203/Son, exon 3 of 12)	16	91647506	91679207	31702	1	Son-203	8875	Son-203;Son-204;Son-202;Son-208;Son-201;Son-205;Son-212	Son;Son;Son;Son;Son;Son;Son	0;0;0;0;0;0;0	TRUE	FALSE	FALSE	FALSE	FALSE	TRUE	TRUE	FALSE	FALSE	Exon	14	31	20658	ENSMUSG00000022961	conserved gene and region	16	91656231	91656409	179	*	179	11
cg06706916	NA	NA	NA	NA	0.708909641	NA	Rfx7	Rfx7_Exon	9	72611687	72611736	72611687	72611688	50	-	CGTCTTGTGTGTGAGTGGGCCCAGAAAGTGTTAAGCCAACCATTTGACAC	Exon (Rfx7-202/Rfx7, exon 7 of 9)	9	72532240	72622829	90590	1	Rfx7-202	79447	Gm18014-201;Rfx7-202;Rfx7-201;Rfx7-203;Rfx7-205;Rfx7-204	Gm18014;Rfx7;Rfx7;Rfx7;Rfx7;Rfx7	-4490;0;0;0;0;0	TRUE	FALSE	FALSE	FALSE	FALSE	TRUE	FALSE	FALSE	FALSE	Exon	6	8	319758	ENSMUSG00000037674	conserved gene and region
cg06772109	NA	NA	-0.007659816	NA	NA	NA	Mecom	Mecom_Intron	3	30514107	30514156	30514155	30514156	50	-	CCTTTCAGGGAGGTAATCAATCAAGTGATCAACAGGGATATTTATCATCG	Intron (Mecom-208/Mecom, intron 2 of 8)	3	29977344	30548008	570665	2	Mecom-208	33852	Mecom-212;Mecom-213;Mecom-207;Mecom-208;Mecom-211;Mecom-209	Mecom;Mecom;Mecom;Mecom;Mecom;Mecom	0;0;0;0;0;0	TRUE	FALSE	FALSE	FALSE	FALSE	FALSE	TRUE	FALSE	FALSE	Intron	57	80	14013	ENSMUSG00000027684	conserved gene but different region	3	30514155	30514288	134	*	134	12
cg06778009	NA	0.366093612	NA	NA	NA	NA	Tesk2	Tesk2_threeUTR	4	116805636	116805685	116805684	116805685	50	-	TGGTACAGGAACACCAAGTCTATAAGGCCATTGTGTAGCACCAGGGGCCG	3' UTR	4	116720969	116805956	84988	1	Tesk2-203	84667	Mutyh-201;Mutyh-203;Mutyh-202;Mutyh-206;Tesk2-201;Tesk2-203;Tesk2-202;Tesk2-204;Toe1-202;Toe1-201;Toe1-208;Toe1-207;Toe1-204;Toe1-203;Toe1-206;Toe1-205	Mutyh;Mutyh;Mutyh;Mutyh;Tesk2;Tesk2;Tesk2;Tesk2;Toe1;Toe1;Toe1;Toe1;Toe1;Toe1;Toe1;Toe1	-2038;-2040;-2053;-2063;84688;0;63953;33873;0;0;-444;-31;0;0;0;0	TRUE	FALSE	FALSE	FALSE	TRUE	TRUE	FALSE	FALSE	FALSE	threeUTR	1	1	230661	ENSMUSG00000033985	mapped to different genes	4	116805684	116805723	40	*	40	6
cg06779064	NA	-1.206207974	NA	NA	NA	NA	Tnrc6a	Tnrc6a_Exon	7	123188796	123188845	123188844	123188845	50	-	TCATCCTTGAACACCACGCTGCCTTCAACTAGTGCCTGGTCATCCATTCG	Exon (Tnrc6a-201/Tnrc6a, exon 20 of 24)	7	123124177	123193987	69811	1	Tnrc6a-203	64619	Tnrc6a-203;Tnrc6a-201;Tnrc6a-205;Tnrc6a-208	Tnrc6a;Tnrc6a;Tnrc6a;Tnrc6a	0;0;0;0	TRUE	FALSE	FALSE	FALSE	FALSE	TRUE	TRUE	FALSE	FALSE	Exon	17	24	233833	ENSMUSG00000052707	conserved gene but different region
cg06785707	NA	NA	NA	NA	0.193895994	NA	Ntrk3	Ntrk3_Exon	7	78577640	78577689	78577640	78577641	50	+	CGGCCGCCGGCAATTGATCTCAGTCTTGCTGCAGACACAATTTGCAGGGC	Promoter (<=1kb)	7	78175959	78578408	402450	2	Ntrk3-201	719	Ntrk3-201;Ntrk3-206;Ntrk3-205;Ntrk3-202;Ntrk3-204;Ntrk3-210;Ntrk3-214;Ntrk3-212;Ntrk3-220;Ntrk3-218	Ntrk3;Ntrk3;Ntrk3;Ntrk3;Ntrk3;Ntrk3;Ntrk3;Ntrk3;Ntrk3;Ntrk3	0;0;0;0;0;0;0;0;1009;0	TRUE	FALSE	TRUE	FALSE	FALSE	TRUE	TRUE	FALSE	FALSE	Exon	4	15	18213	ENSMUSG00000059146	mapped to different genes
cg06795598	0.003955918	NA	NA	NA	NA	NA	Fnbp4	Fnbp4_Exon	2	90758303	90758352	90758303	90758304	50	+	CGAGCCTTGGAGGAAGGAGATGGTAGTGTGTCAGGGTCTAGTCCACGTTC	Exon (Fnbp4-201/Fnbp4, exon 8 of 17)	2	90745370	90781021	35652	1	Fnbp4-201	12933	Fnbp4-201;Fnbp4-210;Fnbp4-202;Fnbp4-204;Fnbp4-209;Fnbp4-208	Fnbp4;Fnbp4;Fnbp4;Fnbp4;Fnbp4;Fnbp4	0;0;0;5731;0;0	TRUE	FALSE	FALSE	FALSE	FALSE	TRUE	FALSE	FALSE	FALSE	Exon	6	6	55935	ENSMUSG00000008200	conserved gene and region
cg06810228	NA	NA	0.14723525	NA	NA	NA	Gm13471	Gm13471_Intergenic_upstream	2	47334560	47334609	47334560	47334561	50	-	CGTAAATGACTAAGCAAGAGATAACAAAATTACATCTGCACTTGTTTGGC	Distal Intergenic	2	48140146	48140578	433	1	Gm13471-201	-805586	NA	NA	NA	FALSE	TRUE	FALSE	FALSE	FALSE	FALSE	FALSE	FALSE	TRUE	Intergenic_upstream	9	10	NA	NA	mapped to different genes
cg06810447	-0.133759803	NA	NA	NA	NA	NA	Speg	Speg_Exon	1	75385075	75385124	75385123	75385124	50	+	CTGGGGGTCAGAGGATAGCCTTTCCGTGGCCAGTGACCTGTACGGCAGCG	Exon (Speg-201/Speg, exon 3 of 41)	1	75375297	75432320	57024	1	Speg-201	9778	Speg-201;Speg-214;Speg-205;Speg-215;Speg-208;Speg-213;Speg-207;Speg-210;Speg-209;Speg-211	Speg;Speg;Speg;Speg;Speg;Speg;Speg;Speg;Speg;Speg	0;0;0;0;0;0;0;0;-388;0	TRUE	FALSE	FALSE	FALSE	FALSE	TRUE	TRUE	FALSE	FALSE	Exon	5	9	11790	ENSMUSG00000026207	conserved gene and region	1	75384919	75385180	262	*	262	21
cg06811295	NA	NA	NA	NA	-0.853451474	NA	Fgfr2	Fgfr2_Intron	7	131552426	131552475	131552474	131552475	50	+	CTGACACCATGATTAAAGCTGACCATTTGTAATGTGTCTCGACCCTGCCG	Intron (Hmx2-202/Hmx2, intron 1 of 2)	7	130162451	133123350	2960900	2	Fgfr2-217	1570875	Fgfr2-217;Hmx2-202;Hmx2-201	Fgfr2;Hmx2;Hmx2	0;0;0	TRUE	FALSE	FALSE	FALSE	FALSE	FALSE	TRUE	FALSE	FALSE	Intron	58	79	14183	ENSMUSG00000030849	mapped to different genes	7	131552465	131552790	326	*	326	26
cg06839075	NA	NA	NA	NA	0.327932663	NA	Pax6	Pax6_Exon	2	105684910	105684959	105684958	105684959	50	-	AATTCTGGGCAGGTATTACGAGACTGGCTCCATCAGACCCAGGGCAATCG	Exon (Pax6-206/Pax6, exon 6 of 13)	2	105668900	105697364	28465	1	Pax6-206	16010	Pax6-206;Pax6-207;Pax6-210;Pax6-214;Pax6-208;Pax6-202;Pax6-205;Pax6-225;Pax6-204;Pax6-201;Pax6-203;Pax6-224;Pax6-219;Pax6-221;Pax6-213;Pax6-211;Pax6-222;Pax6-212;Pax6-215;Pax6-223;Pax6-209;Pax6-216	Pax6;Pax6;Pax6;Pax6;Pax6;Pax6;Pax6;Pax6;Pax6;Pax6;Pax6;Pax6;Pax6;Pax6;Pax6;Pax6;Pax6;Pax6;Pax6;Pax6;Pax6;Pax6	0;0;0;0;0;0;0;0;0;0;0;0;0;0;0;0;0;0;0;0;0;0	TRUE	FALSE	FALSE	FALSE	FALSE	TRUE	TRUE	FALSE	FALSE	Exon	31	78	18508	ENSMUSG00000027168	conserved gene but different region
cg06868293	NA	NA	NA	NA	0.58542797	NA	Scn2a	Scn2a_Exon	2	65682082	65682131	65682082	65682083	50	+	CGGGATCCATGGAATTGGTTGGATTTCACAGTCATTACTTTTGCGTAAGT	Exon (Scn2a-204/Scn2a, exon 5 of 11)	2	65620771	65690175	69405	1	Scn2a-204	61311	Scn2a-204;Scn2a-201;Scn2a-205;Scn2a-202;Scn2a-203;Scn2a-210	Scn2a;Scn2a;Scn2a;Scn2a;Scn2a;Scn2a	0;0;0;0;-149;0	TRUE	FALSE	FALSE	FALSE	FALSE	TRUE	TRUE	FALSE	FALSE	Exon	3	5	110876	ENSMUSG00000075318	conserved gene but different region
cg06878766	NA	NA	0.820845046	NA	NA	NA	Plag1	Plag1_Promoter	4	3937770	3937819	3937818	3937819	50	+	TGAATTTATATTAATTTTTCCCTTATTTTTCGGGTCTCTAATGTCTTCCG	Promoter (<=1kb)	4	3900996	3938382	37387	2	Plag1-201	563	Chchd7-202;Chchd7-206;Chchd7-213;Chchd7-207;Chchd7-208;Chchd7-201;Chchd7-205;Chchd7-214;Chchd7-203;Chchd7-209;Chchd7-210;Chchd7-211;Chchd7-204;Plag1-201;Plag1-202;Plag1-204;Plag1-203	Chchd7;Chchd7;Chchd7;Chchd7;Chchd7;Chchd7;Chchd7;Chchd7;Chchd7;Chchd7;Chchd7;Chchd7;Chchd7;Plag1;Plag1;Plag1;Plag1	-1069;-1069;-1071;-1095;-1095;-1095;-1095;-1095;-1101;-1224;-1603;-1681;-3035;0;0;0;0	TRUE	FALSE	TRUE	FALSE	FALSE	FALSE	TRUE	FALSE	FALSE	Promoter	8	22	56711	ENSMUSG00000003282	conserved gene and region	4	3937683	3937840	158	*	158	13
cg06889609	-0.312986897	NA	NA	NA	NA	NA	Rab8a	Rab8a_fiveUTR	8	72161352	72161401	72161400	72161401	50	-	GTGTAATATGGCGAAGACCTACGATTACCTGTTCAAGCTGCTGCTGATCG	Promoter (<=1kb)	8	72161359	72176057	14699	1	Rab8a-202	0	Rab8a-201;Rab8a-203;Rab8a-202	Rab8a;Rab8a;Rab8a	0;0;0	TRUE	FALSE	TRUE	TRUE	FALSE	TRUE	FALSE	FALSE	FALSE	fiveUTR	3	5	17274	ENSMUSG00000003037	conserved gene but different region	8	72161136	72161662	527	*	527	47
cg06921573	NA	NA	NA	NA	0.167026361	NA	Dmrta2	Dmrta2_Promoter	4	109977972	109978021	109978020	109978021	50	-	ATTGTTGTCCAATTCTGTCTAATGGAGCCCTAAGGACCAACAATAGAGCG	Promoter (<=1kb)	4	109978053	109983687	5635	1	Dmrta2-201	-81	Dmrta2-201	Dmrta2	0	FALSE	TRUE	TRUE	FALSE	FALSE	FALSE	FALSE	FALSE	FALSE	Promoter	7	13	242620	ENSMUSG00000047143	conserved gene and region	4	109978020	109978412	393	*	393	43
cg06970066	NA	NA	0.031673133	NA	NA	NA	Tenm4	Tenm4_Exon	7	96702637	96702686	96702637	96702638	50	+	CGTAGAAACCTAGGCAAGCAGCCATTCCTAGGGACATTGCAGGACAACCT	Exon (Tenm4-201/Tenm4, exon 9 of 33)	7	96171246	96908569	737324	1	Tenm4-201	531391	Tenm4-201;Tenm4-203;Tenm4-202;Tenm4-207	Tenm4;Tenm4;Tenm4;Tenm4	0;0;0;0	TRUE	FALSE	FALSE	FALSE	FALSE	TRUE	TRUE	FALSE	FALSE	Exon	17	26	23966	ENSMUSG00000048078	conserved gene but different region
cg06974979	NA	0.017246393	NA	NA	NA	NA	Gm12074	Gm12074_Intergenic_upstream	11	26962293	26962342	26962293	26962294	50	-	CGCCGTTTTATGCATGCAGCGTAATGTCTTTACTTGAAGTGCTGTTTATT	Distal Intergenic	11	27051697	27051915	219	1	Gm12074-201	-89404	NA	NA	NA	FALSE	TRUE	FALSE	FALSE	FALSE	FALSE	FALSE	FALSE	TRUE	Intergenic_upstream	10	10	100042367	NA	mapped to different genes
cg07005811	-0.350758433	NA	-1.36508154	NA	NA	NA	Phf12	Phf12_Exon	11	78023640	78023689	78023688	78023689	50	-	ACACCAGCACTTTGCAAAGAAAGACTGTCCAATCACAGATAGGACCTCCG	Exon (Phf12-202/Phf12, exon 9 of 11)	11	77982754	78026214	43461	1	Phf12-202	40886	Phf12-202;Phf12-201;Phf12-207;Phf12-206;Phf12-208;Phf12-205;Phf12-203;Phf12-204	Phf12;Phf12;Phf12;Phf12;Phf12;Phf12;Phf12;Phf12	0;0;0;0;0;0;0;0	TRUE	FALSE	FALSE	FALSE	FALSE	TRUE	FALSE	FALSE	FALSE	Exon	14	27	268448	ENSMUSG00000037791	conserved gene and region
cg07117595	NA	NA	-0.030468158	NA	NA	NA	Fhl1	Fhl1_Exon	X	56791262	56791311	56791310	56791311	50	+	AGCCACCCAGTCTCTAAAGCTAGGAAGCCCCCAGTGTGCCACGGGAAACG	Exon (Fhl1-203/Fhl1, exon 7 of 8)	20	56731787	56793346	61560	1	Fhl1-201	59475	Fhl1-201;Fhl1-203;Fhl1-206;Fhl1-205;Fhl1-204;Fhl1-202;Fhl1-210;Fhl1-207;Fhl1-208;Fhl1-209	Fhl1;Fhl1;Fhl1;Fhl1;Fhl1;Fhl1;Fhl1;Fhl1;Fhl1;Fhl1	0;0;0;0;0;0;11443;0;3537;3264	TRUE	FALSE	FALSE	FALSE	FALSE	TRUE	TRUE	FALSE	FALSE	Exon	9	11	14199	ENSMUSG00000023092	conserved gene and region
cg07117806	NA	-0.020963921	NA	NA	NA	NA	Runx2	Runx2_threeUTR	17	44658626	44658675	44658626	44658627	50	-	CGCCCTAAATCACTGAGGCGGTCAGAGAACAAACTAGGTTTAGAGTCATC	3' UTR	17	44495987	44736176	240190	2	Runx2-212	77501	Runx2-212;Runx2-214;Runx2-203;Runx2-202;Runx2-213;Runx2-204;Runx2-210;Runx2-211;Runx2-207;Runx2-201;Runx2-209;Runx2-205;Runx2-206	Runx2;Runx2;Runx2;Runx2;Runx2;Runx2;Runx2;Runx2;Runx2;Runx2;Runx2;Runx2;Runx2	0;0;0;0;0;0;0;0;0;0;0;0;0	TRUE	FALSE	FALSE	FALSE	TRUE	TRUE	TRUE	FALSE	FALSE	threeUTR	10	20	12393	ENSMUSG00000039153	conserved gene and region
cg07159253	NA	NA	NA	NA	1.075915386	NA	Uncx	Uncx_Promoter	5	139539266	139539315	139539266	139539267	50	+	CGGATTTCCCGGGGGAGTAGAGTAAATTAGTTCCATTTCCGAACTGCCTC	Promoter (4-5kb)	5	139543494	139548179	4686	1	Uncx-201	-4179	Uncx-201;Uncx-202	Uncx;Uncx	0;0	TRUE	FALSE	TRUE	FALSE	FALSE	FALSE	TRUE	FALSE	FALSE	Promoter	22	88	22255	ENSMUSG00000029546	conserved gene and region
cg07172031	NA	NA	-0.032120049	NA	NA	NA	Arih1	Arih1_Exon	9	59436847	59436896	59436847	59436848	50	+	CGAGACTTTTTACTTGGATTAATTACATGACACTCAGCAAAGAGCTTCTC	Exon (Arih1-207/Arih1, exon 3 of 14)	9	59388258	59486614	98357	2	Arih1-207	49718	Arih1-207;Arih1-201;Arih1-202;Arih1-204;Arih1-205	Arih1;Arih1;Arih1;Arih1;Arih1	0;0;0;0;0	TRUE	FALSE	FALSE	FALSE	FALSE	TRUE	FALSE	FALSE	FALSE	Exon	6	13	23806	ENSMUSG00000025234	conserved gene and region
cg07211487	NA	0.343564812	NA	NA	NA	NA	Elavl2	Elavl2_threeUTR	4	91251942	91251991	91251990	91251991	50	-	ACACAAGGTCTTATTTACATTACACAAAGCTCAGGTGTTAGCCTTGAACG	3' UTR	4	91250763	91372034	121272	2	Elavl2-204	120043	Elavl2-204;Elavl2-201;Elavl2-207;Elavl2-208;Elavl2-202;Elavl2-209;Elavl2-210;Elavl2-206;Elavl2-203;Elavl2-205	Elavl2;Elavl2;Elavl2;Elavl2;Elavl2;Elavl2;Elavl2;Elavl2;Elavl2;Elavl2	0;0;0;0;0;0;0;0;0;0	TRUE	FALSE	FALSE	FALSE	TRUE	TRUE	FALSE	FALSE	FALSE	threeUTR	6	31	15569	ENSMUSG00000008489	conserved gene and region
cg07221240	0.472643611	NA	NA	NA	NA	NA	Syne1	Syne1_Exon	10	5194628	5194677	5194628	5194629	50	-	CGATCTGCTCCTGGTAGCCCTTAATTTTCTGCGCCAGCTCCTGAGGAAAC	Exon (Syne1-205/Syne1, exon 91 of 146)	10	5020917	5550678	529762	2	Syne1-205	356001	Syne1-205;Syne1-206	Syne1;Syne1	0;0	TRUE	FALSE	FALSE	FALSE	FALSE	TRUE	TRUE	FALSE	FALSE	Exon	2	2	64009	ENSMUSG00000096054	conserved gene and region	10	5194500	5194689	190	*	190	11
cg07230616	NA	-0.094726626	NA	-0.360175773	NA	NA	Ube2q1	Ube2q1_Exon	3	89781788	89781837	89781836	89781837	50	-	AAGAGCACAGCAGTCCTACAAGTCCTTGGTGCAGATCCACGAAAAAAACG	Exon (Ube2q1-201/Ube2q1, exon 12 of 13)	3	89773616	89784000	10385	1	Ube2q1-201	8172	AC102392.1-201;Ube2q1-201;Ube2q1-203;Ube2q1-202	AC102392.1;Ube2q1;Ube2q1;Ube2q1	4473;0;7928;0	TRUE	FALSE	FALSE	FALSE	FALSE	TRUE	FALSE	FALSE	FALSE	Exon	4	6	70093	ENSMUSG00000042572	conserved gene and region
cg07238438	NA	NA	NA	NA	2.014616282	NA	Gm9006	Gm9006_Intergenic_downstream	12	107692738	107692787	107692738	107692739	50	+	CGGGCTCCCCTGCCTAGAAGCCAAGGCCGATTAATATCTGCCTACCTTGT	Distal Intergenic	12	107613000	107613840	841	1	Gm9006-201	79738	NA	NA	NA	FALSE	TRUE	FALSE	FALSE	FALSE	FALSE	FALSE	FALSE	TRUE	Intergenic_downstream	1	4	108167974	NA	mapped to different genes
cg07275860	-0.058168592	NA	NA	NA	NA	NA	Rab35	Rab35_fiveUTR	5	115631982	115632031	115632030	115632031	50	+	GGAGGTGTTTCTGTCAGTTCCGGCTGTTTGTTCGGGAAGTGGATCCGCCG	Promoter (<=1kb)	5	115631908	115647736	15829	1	Rab35-201	74	Rab35-201;Rab35-202	Rab35;Rab35	0;-110	TRUE	FALSE	TRUE	TRUE	FALSE	TRUE	FALSE	FALSE	FALSE	fiveUTR	2	2	77407	ENSMUSG00000029518	conserved gene and region	5	115631432	115632564	1133	*	1133	156
cg07279255	NA	NA	1.778231826	0.774517776	1.75262594	0.395026499	En1	En1_Promoter	1	120602318	120602367	120602318	120602319	50	+	CGGCCCTGACTCACGTGCTTCCGGTTTGAAGGCAAAAAGTGTGCCTGGGT	Promoter (<=1kb)	1	120602418	120607992	5575	1	En1-201	-51	En1-201	En1	0	FALSE	TRUE	TRUE	FALSE	FALSE	FALSE	FALSE	FALSE	FALSE	Promoter	23	36	13798	ENSMUSG00000058665	conserved gene and region	1	120602094	120602340	247	*	247	23
cg07311313	NA	NA	NA	NA	0.145655398	NA	Cdx2	Cdx2_Promoter	5	147307283	147307332	147307331	147307332	50	+	TGTTTACAAGACTCTATTAGTAATGACACAGACACCAATGGTTGGAGACG	Promoter (<=1kb)	5	147300805	147307270	6466	2	Cdx2-201	-13	Cdx2-201	Cdx2	0	FALSE	TRUE	TRUE	FALSE	FALSE	FALSE	FALSE	FALSE	FALSE	Promoter	3	7	12591	ENSMUSG00000029646	conserved gene and region	5	147307331	147307436	106	*	106	9
cg07322285	NA	NA	NA	NA	-0.151264737	NA	Pou3f3	Pou3f3_Promoter	1	42695565	42695614	42695613	42695614	50	-	AGATTTCCAGCTTCTACGACGCTCTGCCTAAATTAAAAAGCAACCAATCG	Promoter (<=1kb)	1	42694925	42703176	8252	1	Pou3f3-202	640	Pou3f3-202;Pou3f3-201	Pou3f3;Pou3f3	0;0	TRUE	FALSE	TRUE	FALSE	FALSE	FALSE	TRUE	FALSE	FALSE	Promoter	3	37	18993	ENSMUSG00000045515	conserved gene and region	1	42695391	42695839	449	*	449	33
cg07322750	NA	NA	NA	NA	-0.637406537	NA	Helt	Helt_fiveUTR	8	46294630	46294679	46294678	46294679	50	-	CTGTCCAGAGTCATTAAAGTAATTAAGTAAGCCTTTAATAGGCTGTTCCG	Promoter (<=1kb)	8	46292039	46294671	2633	2	Helt-201	0	Helt-201;Helt-202;Helt-203	Helt;Helt;Helt	0;-641;-1295	TRUE	FALSE	TRUE	TRUE	FALSE	TRUE	FALSE	FALSE	FALSE	fiveUTR	7	22	234219	ENSMUSG00000047171	conserved gene but different region	8	46294678	46294897	220	*	220	21
cg07351279	NA	0.009315876	NA	NA	NA	NA	Sox5	Sox5_Intron	6	144166213	144166262	144166261	144166262	50	+	TTTCCCCCTTCTCAAGGGAGGCATTGTTCTTGCCTTTCCATAACCAGGCG	Intron (Sox5-201/Sox5, intron 1 of 14)	6	143828425	144209480	381056	2	Sox5-201	43218	Sox5-201;Sox5-214;Sox5-205;Sox5-202;Sox5-209;Sox5-207;Sox5-210;Sox5-212;Sox5-208;Sox5-213	Sox5;Sox5;Sox5;Sox5;Sox5;Sox5;Sox5;Sox5;Sox5;Sox5	0;0;0;0;0;0;0;0;0;0	TRUE	FALSE	FALSE	FALSE	FALSE	FALSE	TRUE	FALSE	FALSE	Intron	61	71	20678	ENSMUSG00000041540	conserved gene and region
cg07379873	0.245395569	NA	NA	NA	NA	NA	Srsf11	Srsf11_threeUTR	3	158023301	158023350	158023349	158023350	50	+	GGTGTGCTCTCAACTTTCAAAAGCTGTTTTATGAACAACGACTCGTGTCG	3' UTR	3	158010473	158036639	26167	2	Srsf11-204	13289	Srsf11-204;Srsf11-213;Srsf11-202;Srsf11-207;Srsf11-201;Srsf11-217;Srsf11-218;Srsf11-206;Srsf11-209;Srsf11-210;Srsf11-212;Srsf11-203;Srsf11-208;Srsf11-215	Srsf11;Srsf11;Srsf11;Srsf11;Srsf11;Srsf11;Srsf11;Srsf11;Srsf11;Srsf11;Srsf11;Srsf11;Srsf11;Srsf11	0;0;0;-161;0;-1297;0;0;0;0;0;0;0;0	TRUE	FALSE	FALSE	FALSE	TRUE	TRUE	TRUE	FALSE	FALSE	threeUTR	6	8	69207	ENSMUSG00000055436	conserved gene but different region
cg07428697	-0.393043704	NA	NA	NA	NA	NA	Ccdc71l	Ccdc71l_Exon	12	32379192	32379241	32379192	32379193	50	+	CGGAGCTCTGGAGCTTCCTCTGCAGCCTCAAGCACCAGTTCTCCCCGCAC	Promoter (<=1kb)	12	32378704	32382943	4240	1	Ccdc71l-201	488	Ccdc71l-201	Ccdc71l	0	TRUE	FALSE	TRUE	FALSE	FALSE	TRUE	FALSE	FALSE	FALSE	Exon	1	1	72123	ENSMUSG00000090946	conserved gene and region	12	32378735	32379193	459	*	459	65
cg07437635	NA	0.245729276	NA	NA	NA	NA	Bcl11a	Bcl11a_Exon	11	24163680	24163729	24163728	24163729	50	-	GGTTACTGCAACCATTCCAGCCAGGTAGCAAGCCGCCCTTCCTGGCGACG	Exon (Bcl11a-201/Bcl11a, exon 4 of 5)	11	24078056	24173194	95139	1	Bcl11a-201	85624	Bcl11a-201;Bcl11a-203;Bcl11a-202;Bcl11a-204;Bcl11a-206	Bcl11a;Bcl11a;Bcl11a;Bcl11a;Bcl11a	0;0;0;0;0	TRUE	FALSE	FALSE	FALSE	FALSE	TRUE	TRUE	FALSE	FALSE	Exon	51	98	14025	ENSMUSG00000000861	conserved gene and region	11	24163725	24163848	124	*	124	9
cg07440346	-0.573898595	-0.009241655	-0.62549393	NA	NA	NA	Ypel3	Ypel3_fiveUTR	7	126777809	126777858	126777809	126777810	50	+	CGTGGGGCCACTGCCCCCGGCCCCCGCCATGGTGCGGATTTCAAAGCCCA	Promoter (<=1kb)	7	126776955	126780514	3560	1	Ypel3-201	854	Gdpd3-201;Gdpd3-203;Tbx6-202;Tbx6-201;Ypel3-201;Ypel3-210;Ypel3-204;Ypel3-209;Ypel3-211;Ypel3-203;Ypel3-207;Ypel3-205;Ypel3-202;Ypel3-208;Ypel3-206	Gdpd3;Gdpd3;Tbx6;Tbx6;Ypel3;Ypel3;Ypel3;Ypel3;Ypel3;Ypel3;Ypel3;Ypel3;Ypel3;Ypel3;Ypel3	11475;9289;-3625;-3625;0;0;0;0;0;0;0;0;0;0;0	TRUE	FALSE	TRUE	TRUE	FALSE	TRUE	TRUE	FALSE	FALSE	fiveUTR	2	4	66090	ENSMUSG00000042675	conserved gene and region	7	126777793	126777939	147	*	147	11
cg07451598	NA	-0.085553197	NA	NA	NA	NA	Gm49473	Gm49473_Intergenic_downstream	15	102777233	102777282	102777281	102777282	50	+	TAATTGCAATGAGGCCCTCTAGGCCGTGAATTAATGTGTCATAACTCACG	Distal Intergenic	15	102795121	102795371	251	2	Gm49473-201	18089	NA	NA	NA	FALSE	TRUE	FALSE	FALSE	FALSE	FALSE	FALSE	FALSE	TRUE	Intergenic_downstream	6	12	NA	NA	mapped to different genes
cg07476673	NA	NA	0.238436803	NA	NA	NA	Dll1	Dll1_Promoter	17	15378818	15378867	15378866	15378867	50	+	TGTTTAACTTCAGCGTTTCTATAGGAGCCTGTTGTAGTTTAACTCCTGCG	Promoter (1-2kb)	17	15374794	15376872	2079	2	Dll1-205	-1946	Dll1-201;Dll1-203;Dll1-202;Dll1-205	Dll1;Dll1;Dll1;Dll1	-2842;-4746;-3718;0	FALSE	TRUE	TRUE	FALSE	FALSE	FALSE	FALSE	FALSE	FALSE	Promoter	9	9	13388	ENSMUSG00000014773	conserved gene but different region
cg07479479	-0.56738083	NA	NA	NA	NA	NA	Tfap2b	Tfap2b_Intron	1	19231845	19231894	19231845	19231846	50	+	CGCGGTTTGTCCCGTTGACAGCGTAATTTAAAGAAATATATGGAAGGCTG	Intron (Tfap2b-201/Tfap2b, intron 6 of 6)	1	19208914	19238576	29663	1	Tfap2b-201	22931	Tfap2b-201;Tfap2b-204;Tfap2b-202	Tfap2b;Tfap2b;Tfap2b	0;0;0	TRUE	FALSE	FALSE	FALSE	FALSE	FALSE	TRUE	FALSE	FALSE	Intron	23	40	21419	ENSMUSG00000025927	conserved gene and region	1	19231763	19231867	105	*	105	11
cg07502389	NA	NA	NA	NA	-0.182064445	-0.150366343	Nefm	Nefm_fiveUTR	14	68124812	68124861	68124860	68124861	50	+	ATCTTGGAGGCCTTGGGGCGTGTGGCTGTCACAGCGTTCTGCCGGCCTCG	Promoter (<=1kb)	14	68082590	68124846	42257	2	Nefm-202	0	Nefm-202;Nefm-201	Nefm;Nefm	0;0	TRUE	FALSE	TRUE	TRUE	FALSE	TRUE	FALSE	FALSE	FALSE	fiveUTR	3	4	18040	ENSMUSG00000022054	mapped to different genes	14	68124846	68125102	257	*	257	25
cg07511181	NA	NA	NA	NA	1.033057432	NA	Slit1	Slit1_threeUTR	19	41600614	41600663	41600614	41600615	50	+	CGCGTGGTCTGGCAGATGGCATAGCCCCTCTGGACCTGGTGAAAGTCCCG	3' UTR	19	41600257	41743492	143236	2	Slit1-203	142829	Slit1-203;Slit1-201;Slit1-202;Slit1-204	Slit1;Slit1;Slit1;Slit1	0;0;0;7867	TRUE	FALSE	FALSE	FALSE	TRUE	TRUE	FALSE	FALSE	FALSE	threeUTR	4	4	20562	ENSMUSG00000025020	conserved gene but different region
cg07517669	NA	NA	NA	NA	NA	0.759935999	Hoxd10	Hoxd10_Exon	2	74694263	74694312	74694263	74694264	50	+	CGACAGGCAGGTCAAGATTTGGTTTCAAAACCGCCGAATGAAACTCAAGA	Exon (Hoxd10-201/Hoxd10, exon 2 of 2)	2	74691924	74695105	3182	1	Hoxd10-201	2339	Hoxd10-201;Hoxd9-201	Hoxd10;Hoxd9	0;0	TRUE	FALSE	FALSE	FALSE	FALSE	TRUE	FALSE	FALSE	FALSE	Exon	21	24	15430	ENSMUSG00000050368	conserved gene and region	2	74694222	74694348	127	*	127	12
cg07539423	0.022968175	NA	NA	NA	NA	NA	Nova2	Nova2_threeUTR	7	18964643	18964692	18964643	18964644	50	+	CGCGATAAACGCCATCTCAGCATCTGTGTCTAATGTTGTCTTTTTTGCTT	3' UTR	7	18925888	18965319	39432	1	Nova2-201	38755	Nova2-201;Nova2-202	Nova2;Nova2	0;0	TRUE	FALSE	FALSE	FALSE	TRUE	TRUE	FALSE	FALSE	FALSE	threeUTR	2	5	384569	ENSMUSG00000030411	conserved gene and region
cg07560681	NA	NA	NA	NA	-1.295624559	NA	Dmtf1	Dmtf1_fiveUTR	5	9161629	9161678	9161629	9161630	50	-	CGGGCACTTTGGAAGAACCAGGATGGAAGCTCCAAAAAATACCAGGATGG	Promoter (<=1kb)	5	9119070	9161671	42602	2	Dmtf1-204	0	Dmtf1-201;Dmtf1-209;Dmtf1-202;Dmtf1-208;Dmtf1-214;Dmtf1-213;Dmtf1-204;Dmtf1-207;Dmtf1-215;Dmtf1-216;Dmtf1-211;Dmtf1-206;Dmtf1-218;Tmem243-202;Tmem243-204	Dmtf1;Dmtf1;Dmtf1;Dmtf1;Dmtf1;Dmtf1;Dmtf1;Dmtf1;Dmtf1;Dmtf1;Dmtf1;Dmtf1;Dmtf1;Tmem243;Tmem243	0;0;0;0;0;0;0;0;0;0;0;0;0;0;5896	TRUE	FALSE	TRUE	TRUE	FALSE	TRUE	FALSE	FALSE	FALSE	fiveUTR	2	11	23857	ENSMUSG00000042508	mapped to different genes	5	9161250	9161630	381	*	381	58
cg07564343	-0.157844872	NA	NA	NA	NA	NA	Rora	Rora_Intron	9	68655809	68655858	68655809	68655810	50	-	CGAGCGGGTTATGTAACAGGGTTAATCAGAAACACTGGAGAAAATCCCCT	Intron (Rora-204/Rora, intron 1 of 2)	9	68653786	68664967	11182	1	Rora-204	2023	Rora-204;Rora-201;Rora-206;Rora-205	Rora;Rora;Rora;Rora	0;0;0;0	TRUE	FALSE	FALSE	FALSE	FALSE	FALSE	TRUE	FALSE	FALSE	Intron	11	19	19883	ENSMUSG00000032238	conserved gene and region
cg07566172	-0.082167107	NA	NA	NA	NA	NA	Klf7	Klf7_Promoter	1	64121654	64121703	64121654	64121655	50	+	CGCGTGTGACCATGTAAGGTAAACAGGGGGCTCATGAAGTCACTGAGGAC	Promoter (<=1kb)	1	64079103	64122282	43180	2	Klf7-203	579	Klf7-202;Klf7-201;Klf7-203	Klf7;Klf7;Klf7	0;0;0	TRUE	FALSE	TRUE	FALSE	FALSE	FALSE	TRUE	FALSE	FALSE	Promoter	3	21	93691	ENSMUSG00000025959	mapped to different genes	1	64121602	64121657	56	*	56	9
cg07571117	-0.126372629	NA	NA	NA	NA	NA	Fam98a	Fam98a_fiveUTR	17	75551773	75551822	75551821	75551822	50	+	CTCCATGAGGTCACACTCCATGCTACTGTGGTATTCAAATTTCCGAGTCG	Promoter (<=1kb)	17	75544467	75551796	7330	2	Fam98a-203	0	Fam98a-201;Fam98a-204;Fam98a-205;Fam98a-203	Fam98a;Fam98a;Fam98a;Fam98a	0;0;0;0	TRUE	FALSE	TRUE	TRUE	FALSE	TRUE	FALSE	FALSE	FALSE	fiveUTR	4	6	72722	ENSMUSG00000002017	conserved gene and region	17	75551816	75552006	191	*	191	22
cg07576552	NA	-0.218872314	NA	-0.759818983	NA	NA	Stx5a	Stx5a_Exon	19	8742288	8742337	8742288	8742289	50	-	CGCTACGGGTCTAAGAACACGGATCAGGGTGTCTACCTGGGTCTCTCAAA	Promoter (<=1kb)	19	8741413	8755586	14174	1	Stx5a-218	875	1700092M07Rik-201;1700092M07Rik-202;Stx5a-218;Stx5a-213;Stx5a-203;Stx5a-219;Stx5a-205;Stx5a-201;Stx5a-209;Stx5a-212;Stx5a-202;Stx5a-206;Stx5a-208;Stx5a-211;Stx5a-207;Wdr74-202;Wdr74-201;Wdr74-203;Wdr74-204;Wdr74-207;Wdr74-205;Wdr74-206;Wdr74-208	1700092M07Rik;1700092M07Rik;Stx5a;Stx5a;Stx5a;Stx5a;Stx5a;Stx5a;Stx5a;Stx5a;Stx5a;Stx5a;Stx5a;Stx5a;Stx5a;Wdr74;Wdr74;Wdr74;Wdr74;Wdr74;Wdr74;Wdr74;Wdr74	1570;1526;0;0;0;0;0;0;0;0;0;0;0;0;-523;0;0;0;6407;0;0;0;2620	TRUE	FALSE	TRUE	FALSE	FALSE	TRUE	TRUE	FALSE	FALSE	Exon	4	4	56389	ENSMUSG00000010110	conserved gene and region	19	8742266	8742308	43	*	43	7
cg07576603	NA	NA	-0.002702459	NA	NA	NA	Sox6	Sox6_Intron	7	115766529	115766578	115766577	115766578	50	-	ACAAACAGACGGTCCTGGATTACAAGCAGCACTTGACCATTTAAATCACG	Intron (Sox6-210/Sox6, intron 4 of 15)	7	115470872	116031047	560176	2	Sox6-210	264469	Sox6-210;Sox6-201;Sox6-202;Sox6-204;Sox6-205;Sox6-203;Sox6-212;Sox6-206;Sox6-209;Sox6-214	Sox6;Sox6;Sox6;Sox6;Sox6;Sox6;Sox6;Sox6;Sox6;Sox6	0;0;0;0;0;0;0;0;0;0	TRUE	FALSE	FALSE	FALSE	FALSE	FALSE	TRUE	FALSE	FALSE	Intron	37	57	20679	ENSMUSG00000051910	conserved gene but different region
cg07601771	0.109677368	NA	NA	NA	NA	NA	Ogt	Ogt_Exon	X	101654458	101654507	101654458	101654459	50	-	CGAATGAACCCCTGTGAACGGTTGACTAGATGAGTAATCTGATTGACTGG	Exon (Ogt-204/Ogt, exon 4 of 4)	20	101640060	101682940	42881	1	Ogt-202	14398	Ogt-202;Ogt-206;Ogt-201;Ogt-205;Ogt-204;Ogt-207;Ogt-203	Ogt;Ogt;Ogt;Ogt;Ogt;Ogt;Ogt	0;0;0;0;0;0;0	TRUE	FALSE	FALSE	FALSE	FALSE	TRUE	TRUE	TRUE	FALSE	Exon	32	33	108155	ENSMUSG00000034160	conserved gene and region	X	101654404	101654477	74	*	74	8
cg07617635	NA	NA	NA	NA	-0.337159724	NA	Gm48049	Gm48049_Intergenic_downstream	13	98572868	98572917	98572916	98572917	50	+	AATGAAAGAGACACCCCCTGTTTTGACAGCTGGACCAGCGGCCTGGATCG	Distal Intergenic	13	98557761	98558031	271	1	Gm48049-201	15107	NA	NA	NA	FALSE	TRUE	FALSE	FALSE	FALSE	FALSE	FALSE	FALSE	TRUE	Intergenic_downstream	4	4	NA	NA	mapped to different genes	13	98572906	98573233	328	*	328	34
cg07672217	NA	NA	NA	NA	-0.625672294	NA	Wnt1	Wnt1_Exon	15	98792809	98792858	98792809	98792810	50	-	CGCGTCACCGAGCGCTGCAACTGCACCTTCCACTGGTGCTGCCACGTCAG	Exon (Wnt1-201/Wnt1, exon 4 of 4)	15	98789857	98793837	3981	1	Wnt1-201	2952	Wnt1-201	Wnt1	0	TRUE	FALSE	FALSE	FALSE	FALSE	TRUE	FALSE	FALSE	FALSE	Exon	3	12	22408	ENSMUSG00000022997	conserved gene and region	15	98792311	98793016	706	*	706	73
cg07676047	NA	NA	NA	NA	-0.35669448	0.072037049	Sox2	Sox2_Intron	3	34639991	34640040	34639991	34639992	50	+	CGCGCTGTCTTATTTACAGCCCACTGCTTGCTGTAGAGTCTTTGTTAGGA	Intron (Sox2ot-203/Sox2ot-203, intron 3 of 3)	3	34650405	34652461	2057	1	Sox2-201	-10365	NA	NA	NA	TRUE	FALSE	FALSE	FALSE	FALSE	FALSE	TRUE	FALSE	FALSE	Intron	34	62	20674	ENSMUSG00000074637	mapped to different genes
cg07687349	NA	NA	NA	NA	-1.040914277	NA	Tbr1	Tbr1_Exon	2	61804890	61804939	61804938	61804939	50	+	TCAGTCAGATACAGACAATTTTCCTGACTCCAAGGACTCACCAGGGGACG	Promoter (<=1kb)	2	61804453	61814114	9662	1	Tbr1-201	437	Psmd14-201;Psmd14-208;Psmd14-202;Tbr1-204;Tbr1-201;Tbr1-202;Tbr1-203	Psmd14;Psmd14;Psmd14;Tbr1;Tbr1;Tbr1;Tbr1	0;0;0;0;0;0;0	TRUE	FALSE	TRUE	FALSE	FALSE	TRUE	FALSE	FALSE	FALSE	Exon	24	27	21375	ENSMUSG00000035033	conserved gene and region	2	61804938	61805248	311	*	311	21
cg07751402	NA	NA	NA	NA	-0.236499637	NA	Dach1	Dach1_Exon	14	98168487	98168536	98168487	98168488	50	-	CGTTGGTGCAGTCATTGTAGAGGGTCTCGAAGTCCTTCCTGGAGATGAGT	Exon (Dach1-201/Dach1, exon 1 of 11)	14	97786853	98169543	382691	2	Dach1-201	1007	Dach1-201;Dach1-202;Dach1-203	Dach1;Dach1;Dach1	0;0;0	TRUE	FALSE	FALSE	FALSE	FALSE	TRUE	FALSE	FALSE	FALSE	Exon	5	76	13134	ENSMUSG00000055639	conserved gene and region	14	98168225	98168726	502	*	502	39
cg07763739	NA	NA	-0.687054634	NA	NA	NA	Pinx1	Pinx1_Intron	14	63883970	63884019	63883970	63883971	50	-	CGGCTTGAGGGACTCTGCTAGAGAGAAACAGGCTGTTGATAAATGGTTTT	Intron (Pinx1-201/Pinx1, intron 6 of 6)	14	63860364	63919855	59492	1	Pinx1-201	23606	Pinx1-201	Pinx1	0	TRUE	FALSE	FALSE	FALSE	FALSE	FALSE	TRUE	FALSE	FALSE	Intron	2	2	72400	ENSMUSG00000021958	conserved gene and region
cg07866534	NA	NA	0.535375803	NA	NA	NA	Lrmda	Lrmda_Intron	14	22281518	22281567	22281518	22281519	50	-	CGTAATAGTTTGCAGTTATAGCTATAGTGAGAACAGCAGGCAAGACTATA	Intron (Lrmda-201/Lrmda, intron 2 of 6)	14	22019712	23056085	1036374	1	Lrmda-201	261806	Lrmda-201;Lrmda-204;Lrmda-203;Lrmda-206	Lrmda;Lrmda;Lrmda;Lrmda	0;0;0;0	TRUE	FALSE	FALSE	FALSE	FALSE	FALSE	TRUE	FALSE	FALSE	Intron	157	157	76633	ENSMUSG00000063458	conserved gene and region
cg07875786	NA	NA	NA	NA	0.26174231	NA	Nr2f1	Nr2f1_Exon	13	78200391	78200440	78200391	78200392	50	-	CGAAAGGGGGATCTGCGCGAATGTCTGTATATAGTGAACTTTGACACTAC	Promoter (<=1kb)	13	78188973	78199757	10785	2	Nr2f1-201	-683	Nr2f1-201;Nr2f1-205;Nr2f1-203;Nr2f1-202;Nr2f1-206	Nr2f1;Nr2f1;Nr2f1;Nr2f1;Nr2f1	0;0;0;0;0	TRUE	FALSE	TRUE	FALSE	FALSE	TRUE	TRUE	FALSE	FALSE	Exon	25	55	13865	ENSMUSG00000069171	conserved gene but different region
cg07898297	0.116562646	NA	NA	NA	0.516183508	NA	Arl4c	Arl4c_Exon	1	88701124	88701173	88701172	88701173	50	+	TCAGGATCATCTCATAGAGCTTGTCCATGCCCTCGGTGAGGCCCTCGCCG	Promoter (<=1kb)	1	88673125	88701876	28752	2	Arl4c-201	703	Arl4c-201;Arl4c-203;Arl4c-202	Arl4c;Arl4c;Arl4c	0;0;0	TRUE	FALSE	TRUE	FALSE	FALSE	TRUE	FALSE	FALSE	FALSE	Exon	2	3	320982	ENSMUSG00000049866	conserved gene and region	1	88700885	88702514	1630	*	1630	169
cg07921922	NA	NA	NA	NA	0.182083415	-0.023552119	Phox2b	Phox2b_Promoter	5	67098562	67098611	67098562	67098563	50	+	CGTGATAAATTCTTTCATTTGTGTAAGCAAATTTCGTTTGGTAAATACTA	Promoter (<=1kb)	5	67094399	67099301	4903	2	Phox2b-201	690	Phox2b-201;Phox2b-202	Phox2b;Phox2b	0;0	TRUE	FALSE	TRUE	FALSE	FALSE	FALSE	TRUE	FALSE	FALSE	Promoter	13	28	18935	ENSMUSG00000012520	conserved gene and region
cg07933800	NA	NA	NA	NA	-0.577167448	NA	Six1	Six1_Exon	12	73045888	73045937	73045888	73045889	50	+	CGGTCTCTTTGCCTCCGGTTCTTAAACCAGTTGCTGACCTGGGTGGTGGT	Exon (Six1-201/Six1, exon 1 of 2)	12	73041827	73047179	5353	2	Six1-201	1242	Six1-204;Six1-201;Six1-203;Six1-202	Six1;Six1;Six1;Six1	0;0;0;-597	TRUE	FALSE	FALSE	FALSE	FALSE	TRUE	TRUE	FALSE	FALSE	Exon	3	18	20471	ENSMUSG00000051367	conserved gene and region	12	73045722	73046158	437	*	437	46
cg07966323	0.169923102	NA	NA	NA	NA	NA	Evx1	Evx1_Intergenic_downstream	6	52321763	52321812	52321763	52321764	50	-	CGGGTCACAGATTGAATCAATTGTCCAATCTTGTGAAAGTCATATCCTTG	Distal Intergenic	6	52313552	52316644	3093	1	Evx1-202	8260	Evx1-201	Evx1	0	FALSE	TRUE	FALSE	FALSE	FALSE	FALSE	FALSE	FALSE	TRUE	Intergenic_downstream	8	19	14028	ENSMUSG00000005503	mapped to different genes	6	52321755	52321764	10	*	10	4
cg07991667	NA	0.155706977	NA	NA	NA	NA	Usp35	Usp35_Exon	7	97325354	97325403	97325354	97325355	50	+	CGCCACAGCTGCGCCAGGAGCCCGCTCACCTGCTGGGCCTGCTCTAGGAA	Promoter (<=1kb)	7	97309380	97325964	16585	2	Usp35-202	561	Usp35-202;Usp35-201;Usp35-205	Usp35;Usp35;Usp35	0;0;0	TRUE	FALSE	TRUE	FALSE	FALSE	TRUE	FALSE	FALSE	FALSE	Exon	2	2	244144	ENSMUSG00000035713	conserved gene and region	7	97325218	97326011	794	*	794	98
cg08000413	NA	NA	NA	NA	1.057837248	NA	Scn1a	Scn1a_Exon	2	66351095	66351144	66351095	66351096	50	+	CGTCTTTCAATAGCCGCAAGAGATTCTCTGGTGAAGAAGTTGAAGCTGTC	Exon (Scn1a-203/Scn1a, exon 2 of 27)	2	66270781	66410064	139284	2	Scn1a-203	58920	Scn1a-203;Scn1a-204;Scn1a-201;Scn1a-202;Scn1a-206;Scn1a-205	Scn1a;Scn1a;Scn1a;Scn1a;Scn1a;Scn1a	0;0;0;0;0;0	TRUE	FALSE	FALSE	FALSE	FALSE	TRUE	FALSE	FALSE	FALSE	Exon	3	4	20265	ENSMUSG00000064329	mapped to different genes
cg08001107	-0.181095563	NA	-0.212623634	NA	NA	NA	Lmo4	Lmo4_Exon	3	144198139	144198188	144198139	144198140	50	-	CGCTTGGTTAATTCAGAGTAACAGATCTGCCCCCAAGTGAATTGGAGGCC	Exon (Gm43445-201/Gm43445-201, exon 1 of 1)	3	144188530	144202396	13867	2	Lmo4-203	4208	Lmo4-203;Lmo4-201;Lmo4-202;Lmo4-207;Lmo4-206;Lmo4-208;Lmo4-205;Lmo4-204	Lmo4;Lmo4;Lmo4;Lmo4;Lmo4;Lmo4;Lmo4;Lmo4	0;0;0;0;0;0;0;0	TRUE	FALSE	FALSE	FALSE	FALSE	TRUE	TRUE	FALSE	FALSE	Exon	18	54	16911	ENSMUSG00000028266	conserved gene but different region
cg08014701	NA	NA	NA	NA	0.414427023	NA	Grhl2	Grhl2_fiveUTR	15	37233288	37233337	37233288	37233289	50	-	CGGGCGCTCTCACACACCTTCACCTGCACAGACTTGAAAGTCCAGTTTCA	Promoter (<=1kb)	15	37233036	37333647	100612	1	Grhl2-203	252	Grhl2-203;Grhl2-201;Grhl2-204	Grhl2;Grhl2;Grhl2	0;0;0	TRUE	FALSE	TRUE	TRUE	FALSE	TRUE	TRUE	FALSE	FALSE	fiveUTR	6	8	252973	ENSMUSG00000022286	conserved gene and region	15	37233199	37233293	95	*	95	10
cg08022027	NA	NA	NA	-0.231280731	NA	NA	Prpf4b	Prpf4b_threeUTR	13	34903219	34903268	34903219	34903220	50	-	CGCCTTCTCCAAGGGGTCTGATTTGCTGAGACACCAGCTTCACCTTCTTA	3' UTR	13	34875302	34906064	30763	1	Prpf4b-201	27917	Prpf4b-201;Prpf4b-208;Prpf4b-202;Prpf4b-203;Prpf4b-210;Prpf4b-207;Prpf4b-204;Prpf4b-205;Prpf4b-209	Prpf4b;Prpf4b;Prpf4b;Prpf4b;Prpf4b;Prpf4b;Prpf4b;Prpf4b;Prpf4b	0;0;0;11095;0;0;0;0;0	TRUE	FALSE	FALSE	FALSE	TRUE	TRUE	FALSE	FALSE	FALSE	threeUTR	4	4	19134	ENSMUSG00000021413	mapped to different genes
cg08026135	0.194055882	NA	NA	NA	NA	NA	Chd4	Chd4_Exon	6	125120268	125120317	125120316	125120317	50	-	GAGAAATTGCTGCGGCACCATTATGAGCAGCAGCAAGAAGATCTAGCCCG	Exon (Chd4-203/Chd4, exon 26 of 39)	6	125095981	125130585	34605	1	Chd4-203	24287	Chd4-203;Chd4-201;Chd4-202;Chd4-204;Chd4-205	Chd4;Chd4;Chd4;Chd4;Chd4	0;0;0;0;0	TRUE	FALSE	FALSE	FALSE	FALSE	TRUE	FALSE	FALSE	FALSE	Exon	9	15	107932	ENSMUSG00000063870	conserved gene but different region	6	125120280	125120502	223	*	223	12
cg08030302	NA	0.111847652	NA	NA	NA	NA	Pcdh9	Pcdh9_Exon	14	93888254	93888303	93888254	93888255	50	+	CGGCTGTTGATCAAAGTGTTTTCTGGAATGGAAATATTGATGACAGGAGA	Exon (Pcdh9-208/Pcdh9, exon 2 of 5)	14	93013410	93890669	877260	2	Pcdh9-208	2366	Pcdh9-208;Pcdh9-204;Pcdh9-202;Pcdh9-207;Pcdh9-201;Pcdh9-206;Pcdh9-203;Pcdh9-205	Pcdh9;Pcdh9;Pcdh9;Pcdh9;Pcdh9;Pcdh9;Pcdh9;Pcdh9	0;0;0;0;0;0;0;0	TRUE	FALSE	FALSE	FALSE	FALSE	TRUE	FALSE	FALSE	FALSE	Exon	4	10	211712	ENSMUSG00000055421	conserved gene and region
cg08040307	0.206286267	NA	0.759356527	NA	NA	NA	Zzz3	Zzz3_fiveUTR	3	152427304	152427353	152427304	152427305	50	+	CGTATTGTAGGGACTTGCCATAGTATGGCTGCTTCCCGATCTACTCGTGT	5' UTR	3	152395473	152459474	64002	1	Zzz3-204	31831	Zzz3-204;Zzz3-206;Zzz3-202;Zzz3-207;Zzz3-208;Zzz3-210;Zzz3-201;Zzz3-203	Zzz3;Zzz3;Zzz3;Zzz3;Zzz3;Zzz3;Zzz3;Zzz3	0;0;0;0;0;0;0;0	TRUE	FALSE	FALSE	TRUE	FALSE	TRUE	TRUE	FALSE	FALSE	fiveUTR	1	7	108946	ENSMUSG00000039068	conserved gene and region
cg08056859	0.051742719	NA	NA	NA	NA	NA	Gm1043	Gm1043_fiveUTR	5	37124927	37124976	37124927	37124928	50	+	CGCCAAGGATCAGAACGAGCTGTTAGAATTCAGAGTGCTAGAACTCGAAG	5' UTR	5	37085370	37229342	143973	1	Gm1043-205	39557	Gm1043-205;Jakmip1-201;Jakmip1-202;Jakmip1-212;Jakmip1-215;Jakmip1-203	Gm1043;Jakmip1;Jakmip1;Jakmip1;Jakmip1;Jakmip1	0;0;0;0;0;0	TRUE	FALSE	FALSE	TRUE	FALSE	TRUE	TRUE	FALSE	FALSE	fiveUTR	3	3	381634	ENSMUSG00000117286	mapped to different genes
cg08078389	-0.542862905	NA	NA	NA	NA	NA	Maf	Maf_Intergenic_downstream	8	115513634	115513683	115513682	115513683	50	+	ATGCCACCTTTGGTTATTAACATGTCTCTCTCTACTTTTATGATTTTTCG	Distal Intergenic	8	115682942	115707096	24155	2	Maf-201	193413	NA	NA	NA	FALSE	TRUE	FALSE	FALSE	FALSE	FALSE	FALSE	FALSE	TRUE	Intergenic_downstream	7	23	17132	ENSMUSG00000055435	mapped to different genes
cg08104970	NA	NA	NA	NA	-0.348485434	0.004288454	Gm6411	Gm6411_Intron	13	83732376	83732425	83732376	83732377	50	-	CGTCCTCCTCGGCAGAGGGGGCTGGACTAGACCTTGGACAGCCCCCCCAA	Intron (C130071C03Rik-201/C130071C03Rik-201, intron 1 of 3)	13	83761132	83762335	1204	2	Gm6411-201	29959	NA	NA	NA	TRUE	FALSE	FALSE	FALSE	FALSE	FALSE	TRUE	FALSE	FALSE	Intron	26	36	623241	NA	mapped to different genes
cg08201223	NA	NA	NA	NA	0.253959844	NA	Cadps2	Cadps2_Intron	6	23272823	23272872	23272823	23272824	50	-	CGGAAAACAGAACATCAGTCTAATCTAGTGTTTAAGGTGAGGTTTTCAAA	Intron (Cadps2-213/Cadps2, intron 28 of 29)	6	23262773	23839137	576365	2	Cadps2-213	566265	Cadps2-213;Cadps2-205;Cadps2-212;Cadps2-201;Cadps2-209;Cadps2-206;Cadps2-211;Cadps2-207;Cadps2-202;Cadps2-210	Cadps2;Cadps2;Cadps2;Cadps2;Cadps2;Cadps2;Cadps2;Cadps2;Cadps2;Cadps2	0;0;0;0;0;0;0;0;0;0	TRUE	FALSE	FALSE	FALSE	FALSE	FALSE	TRUE	FALSE	FALSE	Intron	13	15	320405	ENSMUSG00000017978	conserved gene and region
cg08224918	NA	NA	0.064272602	NA	NA	NA	Ankrd17	Ankrd17_Exon	5	90232275	90232324	90232323	90232324	50	-	ACATGCTGATGGAATGTACCAGAAGGAGTTACAATTCCTGTACTATCTCG	Exon (Ankrd17-201/Ankrd17, exon 32 of 34)	5	90227166	90366577	139412	2	Ankrd17-201	134253	Ankrd17-201;Ankrd17-204;Ankrd17-203;Ankrd17-202;Ankrd17-205;Ankrd17-207	Ankrd17;Ankrd17;Ankrd17;Ankrd17;Ankrd17;Ankrd17	0;0;0;0;0;7364	TRUE	FALSE	FALSE	FALSE	FALSE	TRUE	FALSE	FALSE	FALSE	Exon	11	12	81702	ENSMUSG00000055204	conserved gene and region
cg08244911	NA	NA	-0.35364324	NA	NA	NA	Casz1	Casz1_Intron	4	148930515	148930564	148930515	148930516	50	-	CGCCACATCAGTGACAGAGTAATTAACAAACATTGCGAGATCAATGAGGA	Intron (Casz1-201/Casz1, intron 5 of 15)	4	148804429	148945129	140701	1	Casz1-201	126086	Casz1-201;Casz1-202;Casz1-206;Casz1-204	Casz1;Casz1;Casz1;Casz1	0;0;0;0	TRUE	FALSE	FALSE	FALSE	FALSE	FALSE	TRUE	FALSE	FALSE	Intron	94	124	69743	ENSMUSG00000028977	mapped to different genes
cg08247363	NA	NA	-0.012195487	-0.134300563	NA	NA	Gm38154	Gm38154_Intergenic_upstream	3	17616933	17616982	17616981	17616982	50	+	GGCATTTGCCAATCTAAGCAGCACTGGTAGGCAAACAAGCATGGCACACG	Distal Intergenic	3	17670688	17671027	340	1	Gm38154-201	-53706	NA	NA	NA	FALSE	TRUE	FALSE	FALSE	FALSE	FALSE	FALSE	FALSE	TRUE	Intergenic_upstream	7	15	NA	NA	mapped to different genes
cg08256518	NA	NA	-0.01305357	NA	NA	NA	Foxp1	Foxp1_Intron	6	99354796	99354845	99354844	99354845	50	+	ATCCTTAAAAAGACTAAAATAGTTTCATCCTTTCATAACCTGTCATCACG	Intron (Foxp1-204/Foxp1, intron 1 of 18)	6	98925342	99435345	510004	2	Foxp1-204	80500	Foxp1-204;Foxp1-220;Foxp1-221;Foxp1-222;Foxp1-224;Foxp1-227;Foxp1-219;Gm20696-201	Foxp1;Foxp1;Foxp1;Foxp1;Foxp1;Foxp1;Foxp1;Gm20696	0;0;0;0;0;0;0;0	TRUE	FALSE	FALSE	FALSE	FALSE	FALSE	TRUE	FALSE	FALSE	Intron	64	87	108655	ENSMUSG00000030067	mapped to different genes
cg08256909	NA	NA	NA	NA	0.502684393	0.473015592	Nr4a3	Nr4a3_fiveUTR	4	48049079	48049128	48049079	48049080	50	+	CGCTGGAGAGACCCCCAGCCCCACCATTCAGCGCGCAAGATACCCTCCAG	Promoter (<=1kb)	4	48049114	48086447	37334	1	Nr4a3-203	0	Nr4a3-201;Nr4a3-204;Nr4a3-203;Nr4a3-202	Nr4a3;Nr4a3;Nr4a3;Nr4a3	0;0;0;0	TRUE	FALSE	TRUE	TRUE	FALSE	TRUE	FALSE	FALSE	FALSE	fiveUTR	3	20	18124	ENSMUSG00000028341	mapped to different genes	4	48048919	48049113	195	*	195	16
cg08284867	NA	-0.04891825	NA	NA	NA	NA	Gm49473	Gm49473_Intergenic_downstream	15	102777209	102777258	102777257	102777258	50	-	GATGATATTTAAAAAATGGTTCTGTAATTGCAATGAGGCCCTCTAGGCCG	Distal Intergenic	15	102795121	102795371	251	2	Gm49473-201	18162	NA	NA	NA	FALSE	TRUE	FALSE	FALSE	FALSE	FALSE	FALSE	FALSE	TRUE	Intergenic_downstream	6	12	NA	NA	mapped to different genes
cg08303653	NA	NA	NA	-0.037271759	NA	NA	Nfib	Nfib_Exon	4	82498558	82498607	82498558	82498559	50	+	CGCAGTTTGGCAAGGAGCCTGGATGCCCACTTCTGTTTGATTTCAGGCTT	Exon (Nfib-201/Nfib, exon 2 of 12)	4	82290173	82505308	215136	2	Nfib-201	6701	Nfib-201;Nfib-203;Nfib-202;Nfib-205;Nfib-206;Nfib-204;Nfib-207;Nfib-209;Nfib-210;Nfib-208;Nfib-212;Nfib-211	Nfib;Nfib;Nfib;Nfib;Nfib;Nfib;Nfib;Nfib;Nfib;Nfib;Nfib;Nfib	0;0;0;0;0;0;0;0;0;0;0;0	TRUE	FALSE	FALSE	FALSE	FALSE	TRUE	FALSE	FALSE	FALSE	Exon	14	66	18028	ENSMUSG00000008575	conserved gene and region
cg08327269	NA	NA	NA	NA	-0.243341143	NA	Cerkl	Cerkl_Promoter	2	79456933	79456982	79456933	79456934	50	+	CGCGGAGCGCTCCATTCCGGCCCCTTTGTGGCCAGAAGAAAGTGGCCCAT	Promoter (<=1kb)	2	79338569	79456785	118217	2	Cerkl-210	-148	Cerkl-210;Neurod1-201	Cerkl;Neurod1	0;0	FALSE	TRUE	TRUE	FALSE	FALSE	FALSE	FALSE	FALSE	FALSE	Promoter	13	15	228094	ENSMUSG00000075256	mapped to different genes	2	79456843	79457022	180	*	180	14
cg08333796	NA	NA	NA	NA	-1.799597967	NA	Adgrb1	Adgrb1_fiveUTR	15	74516215	74516264	74516263	74516264	50	-	CTGGCTCCCGATTCGGGATCCAGTTTCAGAGAGCGAGAGATTGGGGAGCG	Promoter (<=1kb)	15	74516195	74589464	73270	1	Adgrb1-201	20	Adgrb1-201;Adgrb1-205;Adgrb1-206	Adgrb1;Adgrb1;Adgrb1	0;-174;-567	TRUE	FALSE	TRUE	TRUE	FALSE	TRUE	FALSE	FALSE	FALSE	fiveUTR	5	5	107831	ENSMUSG00000034730	conserved gene and region	15	74516202	74517009	808	*	808	101
cg08391895	NA	NA	NA	0.47658707	NA	NA	Rbm15	Rbm15_Exon	3	107330210	107330259	107330210	107330211	50	-	CGCACCACGGACAATGATCATGACCAGGTAATCTTCTTCAGATTTGGCCA	Exon (Rbm15-201/Rbm15, exon 1 of 2)	3	107325421	107333673	8253	2	Rbm15-201	3414	Rbm15-201;Rbm15-202	Rbm15;Rbm15	0;0	TRUE	FALSE	FALSE	FALSE	FALSE	TRUE	TRUE	FALSE	FALSE	Exon	3	9	229700	ENSMUSG00000048109	conserved gene and region
cg08402704	1.328840558	0.480659361	NA	NA	NA	NA	Gm17304	Gm17304_Exon	5	106574936	106574985	106574936	106574937	50	+	CGAAGCGACGTGGAAACCCTTCCACCAAAATGAGCTGTGATATCCTTTTG	Exon (Gm29464-201/Gm29464-201, exon 1 of 1)	5	106609098	106609201	104	1	Gm17304-201	-34113	NA	NA	NA	TRUE	FALSE	FALSE	FALSE	FALSE	TRUE	TRUE	FALSE	FALSE	Exon	9	35	NA	NA	mapped to different genes	5	106574318	106574945	628	*	628	82
cg08406509	NA	NA	0.073909949	NA	NA	NA	Evx1	Evx1_fiveUTR	6	52313495	52313544	52313543	52313544	50	+	GGTTTCCTTTCATCTTCGCTGTGGCAGACGTTTCTATTTATCCACTTGCG	Promoter (<=1kb)	6	52313498	52318378	4881	1	Evx1-201	0	Evx1-201;Evx1-202	Evx1;Evx1	0;0	TRUE	FALSE	TRUE	TRUE	FALSE	TRUE	FALSE	FALSE	FALSE	fiveUTR	7	19	14028	ENSMUSG00000005503	mapped to different genes	6	52313448	52313581	134	*	134	12
cg08477918	NA	NA	NA	0.075323417	NA	NA	Fchsd2	Fchsd2_Exon	7	101246313	101246362	101246313	101246314	50	-	CGCCCAACTGGTGGATATTGAGCTCTCCCCTGTCAGTGCTCTGAGAATGA	Exon (Fchsd2-201/Fchsd2, exon 11 of 21)	7	101108733	101284405	175673	1	Fchsd2-201	137580	Fchsd2-201;Fchsd2-202;Fchsd2-207;Fchsd2-210	Fchsd2;Fchsd2;Fchsd2;Fchsd2	0;0;0;-4480	TRUE	FALSE	FALSE	FALSE	FALSE	TRUE	TRUE	FALSE	FALSE	Exon	2	2	207278	ENSMUSG00000030691	conserved gene and region
cg08496775	-0.07147084	NA	NA	NA	NA	NA	Stmn2	Stmn2_fiveUTR	3	8509353	8509402	8509401	8509402	50	+	CAGCACCATTGGCCGATCAATATTTAATGCTTGGAGATTCTGACTCTGCG	Promoter (<=1kb)	3	8509360	8561606	52247	1	Stmn2-201	0	Stmn2-201;Stmn2-202;Stmn2-204	Stmn2;Stmn2;Stmn2	0;-113;-184	TRUE	FALSE	TRUE	TRUE	FALSE	TRUE	FALSE	FALSE	FALSE	fiveUTR	1	1	20257	ENSMUSG00000027500	conserved gene and region
cg08527720	NA	NA	NA	0.00998726	NA	NA	Eri3	Eri3_Intron	4	117644991	117645040	117645039	117645040	50	-	GCTGCAGCCGATGAGGGCTACTTCATCTATTAAACCCAATACACTTGTCG	Intron (Eri3-201/Eri3, intron 7 of 8)	4	117550365	117674297	123933	1	Eri3-201	94626	Eri3-201;Eri3-206;Eri3-203	Eri3;Eri3;Eri3	0;0;0	TRUE	FALSE	FALSE	FALSE	FALSE	FALSE	TRUE	FALSE	FALSE	Intron	82	97	140546	ENSMUSG00000033423	conserved gene and region
cg08553905	-0.000782478	NA	NA	NA	NA	NA	Fbxo33	Fbxo33_fiveUTR	12	59219448	59219497	59219448	59219449	50	+	CGGGGCTGCGGCACTGACAAGAACAACAACATCAATGACTAGGAAGAAGG	Promoter (<=1kb)	12	59200655	59219725	19071	2	Fbxo33-201	228	Fbxo33-201;Fbxo33-203	Fbxo33;Fbxo33	0;-647	TRUE	FALSE	TRUE	TRUE	FALSE	TRUE	FALSE	FALSE	FALSE	fiveUTR	3	11	70611	ENSMUSG00000035329	conserved gene but different region	12	59218669	59219457	789	*	789	92
cg08563010	NA	-0.152449693	NA	NA	NA	NA	Sox5	Sox5_Intron	6	144181099	144181148	144181147	144181148	50	-	TTCTGTTTCACTTGTTGGCAAACTTACATTTCAAAACAACAACAAAAACG	Intron (Sox5-201/Sox5, intron 1 of 14)	6	143828425	144209480	381056	2	Sox5-201	28332	Sox5-201;Sox5-214;Sox5-205;Sox5-202;Sox5-209;Sox5-207;Sox5-210;Sox5-212;Sox5-208;Sox5-213	Sox5;Sox5;Sox5;Sox5;Sox5;Sox5;Sox5;Sox5;Sox5;Sox5	0;0;0;0;0;0;0;0;0;0	TRUE	FALSE	FALSE	FALSE	FALSE	FALSE	TRUE	FALSE	FALSE	Intron	61	71	20678	ENSMUSG00000041540	conserved gene and region
cg08569883	NA	NA	0.094047516	NA	-0.027252925	NA	Trim8	Trim8_Exon	19	46515588	46515637	46515588	46515589	50	+	CGCCTCCCAGCAGCCCGGCCACCAGGATTTCTACAGGGTGTATGGGCAGC	Exon (Trim8-201/Trim8, exon 6 of 6)	19	46501702	46516848	15147	1	Trim8-201	13886	Trim8-201;Trim8-202	Trim8;Trim8	0;928	TRUE	FALSE	FALSE	FALSE	FALSE	TRUE	FALSE	FALSE	FALSE	Exon	15	21	93679	ENSMUSG00000025034	conserved gene but different region
cg08591301	NA	NA	-0.204018353	NA	NA	NA	Gm49657	Gm49657_Intergenic_downstream	16	70299214	70299263	70299214	70299215	50	+	CGGCAAAGTACAAAATGGTAATTAAAAATTTCTAGTTCAGTGCGAGGCAC	Distal Intergenic	16	70285257	70285681	425	1	Gm49657-201	13957	NA	NA	NA	FALSE	TRUE	FALSE	FALSE	FALSE	FALSE	FALSE	FALSE	TRUE	Intergenic_downstream	1	1	NA	NA	mapped to different genes
cg08666298	NA	NA	-0.4934789	-0.206700112	NA	NA	Ddx5	Ddx5_threeUTR	11	106783279	106783328	106783327	106783328	50	-	CCAGGATTCACTTGAGAATGTGTCTCTCTCTGGCAGGTCTCGACATGACG	3' UTR	11	106780355	106788532	8178	2	Ddx5-201	5204	Ddx5-201;Ddx5-208;Ddx5-205;Ddx5-207;Ddx5-203;Ddx5-202;Ddx5-209;Ddx5-206;Ddx5-204;Polg2-201;Polg2-203;Polg2-206;Polg2-204;Polg2-202	Ddx5;Ddx5;Ddx5;Ddx5;Ddx5;Ddx5;Ddx5;Ddx5;Ddx5;Polg2;Polg2;Polg2;Polg2;Polg2	0;0;0;0;0;0;2722;0;0;-3764;-3742;-3806;-3806;-3777	TRUE	FALSE	FALSE	FALSE	TRUE	TRUE	TRUE	FALSE	FALSE	threeUTR	5	6	13207	ENSMUSG00000020719	conserved gene but different region
cg08683365	0.110980568	NA	NA	NA	NA	NA	Lrfn5	Lrfn5_Exon	12	61843384	61843433	61843432	61843433	50	+	CTTGGCCATATATGATGATGGCATCACTTCCCTCACTGCCACAAGAGTCG	Exon (Lrfn5-201/Lrfn5, exon 4 of 4)	12	61523948	61845258	321311	1	Lrfn5-201	319436	Lrfn5-201;Lrfn5-202	Lrfn5;Lrfn5	0;0	TRUE	FALSE	FALSE	FALSE	FALSE	TRUE	FALSE	FALSE	FALSE	Exon	3	4	238205	ENSMUSG00000035653	conserved gene and region
cg08701183	NA	NA	NA	NA	0.265474292	NA	Gm9267	Gm9267_Intron	12	118529812	118529861	118529860	118529861	50	+	CATGTAAGGTAAATGCTTCAAAGGCCCCCCTTTCAAATTACAGCTCTCCG	Intron (D230030E09Rik-201/D230030E09Rik-201, intron 1 of 3)	12	118602677	118603080	404	1	Gm9267-201	-72816	NA	NA	NA	TRUE	FALSE	FALSE	FALSE	FALSE	FALSE	TRUE	FALSE	FALSE	Intron	2	20	668611	NA	mapped to different genes
cg08707617	-0.033228514	NA	NA	NA	NA	NA	Bcor	Bcor_Intron	X	12067941	12067990	12067989	12067990	50	+	TTCAGGGCTTAATTACTCCTCCTTGATCCATGGGACTAGACACGACACCG	Intron (Bcor-202/Bcor, intron 1 of 14)	20	12036740	12080553	43814	2	Bcor-202	12563	Bcor-202;Bcor-203;Bcor-204;Bcor-206;Bcor-201;Bcor-207;Bcor-205	Bcor;Bcor;Bcor;Bcor;Bcor;Bcor;Bcor	0;0;0;0;0;0;0	TRUE	FALSE	FALSE	FALSE	FALSE	FALSE	TRUE	FALSE	FALSE	Intron	56	74	71458	ENSMUSG00000040363	conserved gene and region
cg08716535	0.8544872	NA	NA	NA	NA	NA	Ehbp1	Ehbp1_Exon	11	22006819	22006868	22006867	22006868	50	-	TGCCTTTGTTTTGCTCCAGAGTTCGCTCCAAATGCTCATCTTCTTCTTCG	Exon (Ehbp1-201/Ehbp1, exon 24 of 24)	11	22005828	22285838	280011	2	Ehbp1-201	278970	Ehbp1-201;Ehbp1-202;Ehbp1-207;Otx1-202	Ehbp1;Ehbp1;Ehbp1;Otx1	0;0;0;0	TRUE	FALSE	FALSE	FALSE	FALSE	TRUE	FALSE	FALSE	FALSE	Exon	11	45	216565	ENSMUSG00000042302	mapped to different genes
cg08766215	NA	NA	NA	NA	-0.733277252	NA	Nkx2-1	Nkx2-1_Exon	12	56533689	56533738	56533689	56533690	50	+	CGGGGCCATGTTCTTGCTCACGTCCCCCAGCGAGCCCAGGCCGCCCATGC	Exon (Nkx2-1-202/Nkx2-1, exon 2 of 2)	12	56531958	56535106	3149	2	Nkx2-1-202	1368	Nkx2-1-202;Nkx2-1-201	Nkx2-1;Nkx2-1	0;0	TRUE	FALSE	FALSE	FALSE	FALSE	TRUE	FALSE	FALSE	FALSE	Exon	9	29	21869	ENSMUSG00000001496	mapped to different genes	12	56533137	56533945	809	*	809	82
cg08777014	-0.055565169	NA	NA	NA	NA	NA	Plp1	Plp1_Exon	X	136832208	136832257	136832208	136832209	50	+	CGACAAGGTGATCATCCTCAGGATTTTGTGGCAATAACAAGGGGTGGGGG	Exon (Plp1-201/Plp1, exon 3 of 7)	20	136822671	136839733	17063	1	Plp1-201	9537	Plp1-201;Plp1-202;Plp1-203;Plp1-204	Plp1;Plp1;Plp1;Plp1	0;0;0;-994	TRUE	FALSE	FALSE	FALSE	FALSE	TRUE	TRUE	FALSE	FALSE	Exon	8	8	18823	ENSMUSG00000031425	conserved gene and region
cg08809534	0.473702476	NA	NA	NA	NA	NA	Klhl29	Klhl29_Exon	12	5102752	5102801	5102800	5102801	50	+	TCTCTGCCTTCAACAACAATTTTCAGGTCTGTAAACGCTTTCGCTCTGCG	Exon (Klhl29-201/Klhl29, exon 6 of 14)	12	5077472	5375682	298211	2	Klhl29-201	272881	Klhl29-201;Klhl29-202	Klhl29;Klhl29	0;0	TRUE	FALSE	FALSE	FALSE	FALSE	TRUE	FALSE	FALSE	FALSE	Exon	6	23	208439	ENSMUSG00000020627	conserved gene and region
cg08862467	NA	NA	-0.167616113	NA	NA	NA	Fryl	Fryl_Exon	5	73064516	73064565	73064516	73064517	50	-	CGACTAGCTGTTTCTTTGCAAAACTGAGTTGGGCTGTCAAAATGCTGGAT	Exon (Fryl-219/Fryl, exon 5 of 21)	5	73019987	73071175	51189	2	Fryl-219	6610	Fryl-219;Fryl-202;Fryl-210;Fryl-201;Fryl-217;Fryl-211;Fryl-216;Fryl-214	Fryl;Fryl;Fryl;Fryl;Fryl;Fryl;Fryl;Fryl	0;0;0;0;0;0;0;6734	TRUE	FALSE	FALSE	FALSE	FALSE	TRUE	TRUE	FALSE	FALSE	Exon	7	7	72313	ENSMUSG00000070733	conserved gene and region
cg08873407	0.00346482	0.118179796	NA	NA	NA	NA	Gm7729	Gm7729_Intergenic_upstream	18	27388259	27388308	27388259	27388260	50	+	CGTTTGACATTCAGGGCTAGAAGGTTGCCGGTCTGTAATCACTAGTTAAA	Distal Intergenic	18	27598644	27599756	1113	1	Gm7729-201	-210336	NA	NA	NA	FALSE	TRUE	FALSE	FALSE	FALSE	FALSE	FALSE	FALSE	TRUE	Intergenic_upstream	11	22	665646	NA	mapped to different genes
cg08933907	NA	NA	NA	-0.116116519	NA	NA	Nr5a1	Nr5a1_Promoter	2	38718789	38718838	38718837	38718838	50	+	GCTGTTTCCGCTGCACCCCTTATCAGCCTGCTGCCAGATGTTCAGATCCG	Promoter (4-5kb)	2	38692660	38714542	21883	2	Nr5a1-201	-4247	Nr5a1-201;Nr6a1-202;Nr6a1-210;Nr6a1-201	Nr5a1;Nr6a1;Nr6a1;Nr6a1	0;0;0;0	TRUE	FALSE	TRUE	FALSE	FALSE	FALSE	TRUE	FALSE	FALSE	Promoter	3	7	26423	ENSMUSG00000026751	conserved gene and region
cg08935648	NA	NA	-0.096307328	NA	NA	NA	Pou3f1	Pou3f1_Intron	4	124595004	124595053	124595004	124595005	50	+	CGCCCTCAGGAAAGTCTGGCTGGTACAGATTGCCTGAGTCATGAATATTC	Intron (Gm2164-201/Gm2164-201, intron 1 of 1)	4	124656807	124660655	3849	1	Pou3f1-201	-61754	NA	NA	NA	TRUE	FALSE	FALSE	FALSE	FALSE	FALSE	TRUE	FALSE	FALSE	Intron	43	85	18991	ENSMUSG00000090125	mapped to different genes
cg08955338	0.108034624	NA	NA	NA	NA	NA	Gm12685	Gm12685_Intergenic_downstream	4	99374768	99374817	99374816	99374817	50	+	TATACATGTTCAAATAATTGCTCATCCTAATGTGCAGTGATCTGTATTCG	Distal Intergenic	4	99418498	99418711	214	2	Gm12685-201	43894	NA	NA	NA	FALSE	TRUE	FALSE	FALSE	FALSE	FALSE	FALSE	FALSE	TRUE	Intergenic_downstream	13	13	NA	NA	mapped to different genes
cg08977423	0.474881131	NA	NA	NA	NA	NA	Tcf7l2	Tcf7l2_Exon	19	55910640	55910689	55910640	55910641	50	-	CGTAGGACAAATCCCCCATCCGCTAGGATGGTTAGTACCACAGTAAGGAG	Exon (Tcf7l2-213/Tcf7l2, exon 6 of 14)	19	55741820	55933229	191410	1	Tcf7l2-213	168820	Tcf7l2-213;Tcf7l2-201;Tcf7l2-208;Tcf7l2-211;Tcf7l2-212;Tcf7l2-206;Tcf7l2-204;Tcf7l2-205;Tcf7l2-222;Tcf7l2-215;Tcf7l2-214;Tcf7l2-207;Tcf7l2-202;Tcf7l2-209;Tcf7l2-210;Tcf7l2-217;Tcf7l2-220;Tcf7l2-218;Tcf7l2-203;Tcf7l2-216;Tcf7l2-219;Tcf7l2-221	Tcf7l2;Tcf7l2;Tcf7l2;Tcf7l2;Tcf7l2;Tcf7l2;Tcf7l2;Tcf7l2;Tcf7l2;Tcf7l2;Tcf7l2;Tcf7l2;Tcf7l2;Tcf7l2;Tcf7l2;Tcf7l2;Tcf7l2;Tcf7l2;Tcf7l2;Tcf7l2;Tcf7l2;Tcf7l2	0;0;0;0;0;0;0;0;0;0;0;0;0;0;0;0;0;0;0;0;0;0	TRUE	FALSE	FALSE	FALSE	FALSE	TRUE	TRUE	TRUE	FALSE	Exon	14	88	21416	ENSMUSG00000024985	conserved gene and region
cg09010998	-0.411455289	NA	NA	NA	NA	NA	Zeb1	Zeb1_fiveUTR	18	5591905	5591954	5591953	5591954	50	+	GGATCATGGCGGATGGCCCCAGGTGTAAGCGCAGAAAGCAGGCGAACCCG	Promoter (<=1kb)	18	5591912	5766570	174659	1	Zeb1-206	0	Zeb1-212;Zeb1-201;Zeb1-204;Zeb1-202;Zeb1-209;Zeb1-206;Zeb1-208;Zeb1-205;Zeb1-211;Zeb1-207	Zeb1;Zeb1;Zeb1;Zeb1;Zeb1;Zeb1;Zeb1;Zeb1;Zeb1;Zeb1	0;0;0;0;0;0;0;0;0;0	TRUE	FALSE	TRUE	TRUE	FALSE	TRUE	TRUE	FALSE	FALSE	fiveUTR	3	7	21417	ENSMUSG00000024238	mapped to different genes	18	5591882	5592967	1086	*	1086	159
cg09060651	NA	-0.124295646	NA	NA	NA	NA	Cdk12	Cdk12_Intergenic_downstream	11	98290142	98290191	98290190	98290191	50	+	AGGGCGGCATGCTAATGTGGAAATTTAAAGAGCCGCTCGGCTTTAAATCG	Distal Intergenic	11	98263502	98268011	4510	1	Cdk12-204	26640	NA	NA	NA	FALSE	TRUE	FALSE	FALSE	FALSE	FALSE	FALSE	FALSE	TRUE	Intergenic_downstream	17	25	69131	ENSMUSG00000003119	mapped to different genes
cg09108310	-0.001085238	NA	NA	NA	NA	NA	Gm13835	Gm13835_Intron	6	31217611	31217660	31217659	31217660	50	-	CTGTTTACCTCAAGTTTGAATTTTATCTGCGCAACATTAGCTGGAATGCG	Intron (Lncpint-204/Lncpint-204, intron 1 of 3)	6	31141979	31142663	685	2	Gm13835-201	-74997	NA	NA	NA	TRUE	FALSE	FALSE	FALSE	FALSE	FALSE	TRUE	FALSE	FALSE	Intron	3	4	100038973	NA	mapped to different genes
cg09123368	NA	NA	NA	NA	-0.298069703	NA	Vax1	Vax1_Promoter	19	59171401	59171450	59171449	59171450	50	+	TATTAACAAACAGTCCTCTGAGTGCGGCGGTCTGGCGTGGCTCCTGGGCG	Promoter (1-2kb)	19	59166187	59170056	3870	2	Vax1-201	-1345	Vax1-201;Vax1-202	Vax1;Vax1	0;-4421	FALSE	TRUE	TRUE	FALSE	FALSE	FALSE	FALSE	FALSE	FALSE	Promoter	12	18	22326	ENSMUSG00000006270	conserved gene and region	19	59171425	59171501	77	*	77	8
cg09207276	-0.419547547	NA	NA	NA	NA	NA	Sp5	Sp5_fiveUTR	2	70475005	70475054	70475005	70475006	50	+	CGCTATTCTTTGATGATTGGGTAGCGGCAAACTTCAAAGCCATAAATCTT	Promoter (<=1kb)	2	70474923	70477729	2807	1	Sp5-201	82	Sp5-201	Sp5	0	TRUE	FALSE	TRUE	TRUE	FALSE	TRUE	FALSE	FALSE	FALSE	fiveUTR	7	11	64406	ENSMUSG00000075304	mapped to different genes
cg09207493	NA	NA	NA	NA	-0.264847445	NA	Cbln1	Cbln1_Exon	8	87471724	87471773	87471724	87471725	50	-	CGTGGAAGTTAAAACTGTAGATCCCTTTGCGCGGGGCGATGAAAGTGCTG	Promoter (<=1kb)	8	87468405	87472609	4205	2	Cbln1-201	836	Cbln1-201;Cbln1-203;Cbln1-202	Cbln1;Cbln1;Cbln1	0;-656;0	TRUE	FALSE	TRUE	FALSE	FALSE	TRUE	TRUE	FALSE	FALSE	Exon	3	4	12404	ENSMUSG00000031654	conserved gene but different region	8	87471724	87471907	184	*	184	14
cg09217748	-0.000858957	NA	NA	NA	NA	NA	Bcl6	Bcl6_Promoter	16	23988936	23988985	23988984	23988985	50	+	GCTGTAGCAAAGCTCGGCCTCTGGAATTCTGAGAACTAATTTGCTATTCG	Promoter (<=1kb)	16	23965052	23988852	23801	2	Bcl6-201	-84	Bcl6-201;Gm37419-201	Bcl6;Gm37419	0;0	FALSE	TRUE	TRUE	FALSE	FALSE	FALSE	FALSE	FALSE	FALSE	Promoter	7	18	12053	ENSMUSG00000022508	conserved gene but different region	16	23988657	23989142	486	*	486	53
cg09243281	NA	NA	-0.007875026	NA	NA	NA	Ranbp6	Ranbp6_Exon	19	29812379	29812428	29812427	29812428	50	+	TCTTGAATACACTGGTCCAACAACCGTTTGATGATATCCAAATCATGCCG	Promoter (<=1kb)	19	29808400	29812974	4575	2	Ranbp6-201	546	Ranbp6-201;Ranbp6-202	Ranbp6;Ranbp6	0;0	TRUE	FALSE	TRUE	FALSE	FALSE	TRUE	TRUE	FALSE	FALSE	Exon	3	3	240614	ENSMUSG00000074909	conserved gene and region
cg09256836	NA	NA	-0.151625456	NA	NA	NA	Fbxo11	Fbxo11_threeUTR	17	87993146	87993195	87993194	87993195	50	+	CCTTTCATTGTCACATTAACACCAGATGCTAAAAATAAGCCTCCAAACCG	3' UTR	17	87990859	88065028	74170	2	Fbxo11-203	71833	Fbxo11-203;Fbxo11-201;Fbxo11-204;Fbxo11-206;Fbxo11-202;Msh6-201	Fbxo11;Fbxo11;Fbxo11;Fbxo11;Fbxo11;Msh6	0;0;0;0;0;18084	TRUE	FALSE	FALSE	FALSE	TRUE	TRUE	TRUE	FALSE	FALSE	threeUTR	2	3	225055	ENSMUSG00000005371	mapped to different genes
cg09266044	NA	NA	NA	NA	NA	0.58430481	Mbnl2	Mbnl2_Exon	14	120389001	120389050	120389001	120389002	50	+	CGTAACCGTTTGTATGGATTACATAAAGGGGCGTTGCATGAGGGAGAAAT	Exon (Mbnl2-201/Mbnl2, exon 5 of 9)	14	120275669	120431697	156029	1	Mbnl2-201	113332	Mbnl2-201;Mbnl2-204;Mbnl2-206;Mbnl2-202;Mbnl2-203;Mbnl2-208;Mbnl2-210	Mbnl2;Mbnl2;Mbnl2;Mbnl2;Mbnl2;Mbnl2;Mbnl2	0;0;0;0;0;0;0	TRUE	FALSE	FALSE	FALSE	FALSE	TRUE	FALSE	FALSE	FALSE	Exon	10	16	105559	ENSMUSG00000022139	conserved gene and region	14	120388889	120389033	145	*	145	10
cg09289224	0.169234408	NA	0.59845241	NA	NA	NA	Slc44a2	Slc44a2_Exon	9	21353004	21353053	21353052	21353053	50	-	AGGACCTGGAAAGGAATGACGGCTCTCAGGAGCGACCCTACTTCATGTCG	Exon (Slc44a2-205/Slc44a2, exon 6 of 7)	9	21320698	21355028	34331	1	Slc44a2-210	32306	Slc44a2-210;Slc44a2-207;Slc44a2-201;Slc44a2-202;Slc44a2-209;Slc44a2-205;Slc44a2-203	Slc44a2;Slc44a2;Slc44a2;Slc44a2;Slc44a2;Slc44a2;Slc44a2	0;0;0;8122;6020;0;0	TRUE	FALSE	FALSE	FALSE	FALSE	TRUE	TRUE	FALSE	FALSE	Exon	3	3	68682	ENSMUSG00000057193	conserved gene and region
cg09341324	NA	NA	0.243330269	NA	NA	NA	Rps6kb1	Rps6kb1_Exon	11	86519942	86519991	86519990	86519991	50	-	TAAATTAAATCCACGATGAAGGGATGCTTTACTTCCTCCAGAATATTCCG	Exon (Rps6kb1-207/Rps6kb1, exon 5 of 15)	11	86498871	86544805	45935	2	Rps6kb1-207	24814	Rps6kb1-207;Rps6kb1-201;Rps6kb1-203;Rps6kb1-202;Rps6kb1-206	Rps6kb1;Rps6kb1;Rps6kb1;Rps6kb1;Rps6kb1	0;0;0;0;0	TRUE	FALSE	FALSE	FALSE	FALSE	TRUE	FALSE	FALSE	FALSE	Exon	1	4	72508	ENSMUSG00000020516	conserved gene but different region
cg09357573	NA	0.877476459	NA	NA	NA	NA	Mrm1	Mrm1_Intergenic_downstream	11	84726079	84726128	84726127	84726128	50	+	ACATTAAACCAGGAGTCAGGTGATGGGTTCCTTCCGTCTACGCCTATCCG	Distal Intergenic	11	84814743	84815390	648	2	Mrm1-203	89262	NA	NA	NA	FALSE	TRUE	FALSE	FALSE	FALSE	FALSE	FALSE	FALSE	TRUE	Intergenic_downstream	37	42	217038	ENSMUSG00000018405	conserved gene and region	11	84726113	84726148	36	*	36	6
cg09421985	NA	NA	NA	NA	0.511096953	NA	Phox2b	Phox2b_Exon	5	67098776	67098825	67098776	67098777	50	+	CGGACGTGGCCCCAAAAGTGGTCCTTATCGGGTTATACTGGAAGCCACTG	Promoter (<=1kb)	5	67094399	67099301	4903	2	Phox2b-201	476	Phox2b-201;Phox2b-202	Phox2b;Phox2b	0;0	TRUE	FALSE	TRUE	FALSE	FALSE	TRUE	FALSE	FALSE	FALSE	Exon	7	28	18935	ENSMUSG00000012520	conserved gene and region
cg09474015	NA	NA	NA	-0.751881654	NA	NA	Hoxa9	Hoxa9_Exon	6	52225706	52225755	52225754	52225755	50	+	AGGTTTAATGCCATAAGGCCGGCTGGAGGGCAAGCCCGCGAAGGAGAGCG	Exon (Hoxa9-201/Hoxa9, exon 1 of 2)	6	52223100	52227370	4271	2	Hoxa9-201	1615	Hoxa7-204;Hoxa9-201;Hoxa9-203;Hoxa9-202;Hoxa9-204;Hoxa9-205	Hoxa7;Hoxa9;Hoxa9;Hoxa9;Hoxa9;Hoxa9	0;0;0;0;0;0	TRUE	FALSE	FALSE	FALSE	FALSE	TRUE	TRUE	FALSE	FALSE	Exon	9	14	15405	ENSMUSG00000038227	mapped to different genes	6	52225670	52226051	382	*	382	36
cg09486418	NA	NA	NA	NA	0.140400955	NA	Tfap2a	Tfap2a_fiveUTR	13	40738277	40738326	40738325	40738326	50	-	TCACCAACATCTCACCTGGTCATAAAGAGCTGGGTTGCTACCTGCCGACG	Promoter (<=1kb)	13	40716605	40738376	21772	2	Tfap2a-203	50	Tfap2a-202;Tfap2a-203;Tfap2a-208;Tfap2a-206;Tfap2a-204	Tfap2a;Tfap2a;Tfap2a;Tfap2a;Tfap2a	0;0;0;0;0	TRUE	FALSE	TRUE	TRUE	FALSE	TRUE	TRUE	FALSE	FALSE	fiveUTR	6	57	21418	ENSMUSG00000021359	conserved gene and region
cg09522374	NA	-0.243031281	NA	NA	NA	NA	Rnf220	Rnf220_Intron	4	117359982	117360031	117359982	117359983	50	-	CGAGCACAGCTTTTTCCACTTAATAAGCAGAGTGCTGACTTCATTGCGGG	Intron (Rnf220-201/Rnf220, intron 2 of 14)	4	117271463	117497052	225590	2	Rnf220-201	137021	Rnf220-201;Rnf220-202;Rnf220-207	Rnf220;Rnf220;Rnf220	0;0;0	TRUE	FALSE	FALSE	FALSE	FALSE	FALSE	TRUE	FALSE	FALSE	Intron	132	152	66743	ENSMUSG00000028677	conserved gene and region
cg09532103	NA	NA	-0.389770335	NA	NA	NA	Nfix	Nfix_Intron	8	84770828	84770877	84770828	84770829	50	+	CGTAGCTGAGTGGAGGCTAAAAATTAACCAGCCATCTCTGTTTCAATTTG	Intron (Nfix-204/Nfix, intron 2 of 10)	8	84704712	84773396	68685	2	Nfix-204	2519	Nfix-204;Nfix-201;Nfix-202;Nfix-203;Nfix-205	Nfix;Nfix;Nfix;Nfix;Nfix	0;0;0;0;0	TRUE	FALSE	FALSE	FALSE	FALSE	FALSE	TRUE	FALSE	FALSE	Intron	23	49	18032	ENSMUSG00000001911	conserved gene and region
cg09556778	NA	NA	NA	0.10900853	NA	NA	Nr6a1	Nr6a1_Exon	2	38739015	38739064	38739015	38739016	50	+	CGTGTAATCCTTGATTGAGAGCTCGCAGAAGAAAGGCAGTTTCTTGATCC	Exon (Nr6a1-202/Nr6a1, exon 9 of 12)	2	38723370	38927688	204319	2	Nr6a1-202	188624	Nr6a1-202;Nr6a1-210;Nr6a1-201;Nr6a1-204;Nr6a1-205;Nr6a1-207;Nr6a1-206;Nr6a1-208;Nr6a1-209;Nr6a1-211	Nr6a1;Nr6a1;Nr6a1;Nr6a1;Nr6a1;Nr6a1;Nr6a1;Nr6a1;Nr6a1;Nr6a1	0;0;0;0;0;45456;46047;0;45405;24701	TRUE	FALSE	FALSE	FALSE	FALSE	TRUE	FALSE	FALSE	FALSE	Exon	6	12	14536	ENSMUSG00000063972	conserved gene and region
cg09571697	0.226078528	NA	0.500909909	NA	NA	NA	Lrba	Lrba_Intron	3	86556893	86556942	86556893	86556894	50	+	CGTGAAAGTGCAATGCAAATTATGACAGTTACAACCTTCTGTTTTGTTTA	Intron (Lrba-202/Lrba, intron 40 of 50)	3	86224680	86746712	522033	1	Lrba-202	332213	Lrba-202;Lrba-204;Lrba-201;Lrba-203;Lrba-205;Lrba-206	Lrba;Lrba;Lrba;Lrba;Lrba;Lrba	0;0;0;0;0;0	TRUE	FALSE	FALSE	FALSE	FALSE	FALSE	TRUE	FALSE	FALSE	Intron	23	45	80877	ENSMUSG00000028080	conserved gene and region
cg09573865	NA	NA	NA	NA	-0.118745134	NA	Hoxc5	Hoxc5_Exon	15	102991096	102991145	102991096	102991097	50	+	CGAGCGTGGTGCAATATCCCGACTGTAAATCCTCCGCCAACACTAACAGT	Exon (Hoxc8-201/Hoxc8, exon 1 of 2)	15	102967443	103015676	48234	1	Hoxc5-202	23653	Hoxc5-202;Hoxc8-201;Hoxc8-202	Hoxc5;Hoxc8;Hoxc8	0;0;0	TRUE	FALSE	FALSE	FALSE	FALSE	TRUE	TRUE	FALSE	FALSE	Exon	72	134	15424	ENSMUSG00000022485	conserved gene and region	15	102990435	102991303	869	*	869	73
cg09591915	NA	NA	NA	NA	-0.293923173	NA	Hoxc10	Hoxc10_fiveUTR	15	102966841	102966890	102966889	102966890	50	+	AACCCCTCTCTCTGAAAATGACATGCCCTCGCAATGTAACTCCGAACTCG	Promoter (<=1kb)	15	102966796	102971893	5098	1	Hoxc10-201	45	Hoxc10-201;Hoxc5-202	Hoxc10;Hoxc5	0;0	TRUE	FALSE	TRUE	TRUE	FALSE	TRUE	FALSE	FALSE	FALSE	fiveUTR	2	21	209448	ENSMUSG00000022484	mapped to different genes	15	102966870	102967117	248	*	248	20
cg09635067	-0.664397916	NA	NA	NA	NA	NA	Rab29	Rab29_Exon	1	131867727	131867776	131867727	131867728	50	-	CGATATTCCCAGGACAGCTTCAGCAAACACTACAAGTCCACGGTGGGAGG	Promoter (<=1kb)	1	131867224	131872739	5516	1	Rab29-202	503	Rab29-202;Rab29-201;Rab29-203;Rab29-204	Rab29;Rab29;Rab29;Rab29	0;0;0;0	TRUE	FALSE	TRUE	FALSE	FALSE	TRUE	TRUE	FALSE	FALSE	Exon	1	1	226422	ENSMUSG00000026433	conserved gene and region
cg09660031	-0.069337878	NA	NA	NA	NA	NA	Mast4	Mast4_Exon	13	102754217	102754266	102754217	102754218	50	+	CGTCCATTTATCTGATCCAAGTGCTCTGAAAAACTGCCAACTGTACAAAG	Exon (Mast4-220/Mast4, exon 23 of 28)	13	102732486	103334192	601707	2	Mast4-205	579926	Mast4-205;Mast4-220;Mast4-207;Mast4-218;Mast4-212;Mast4-201;Mast4-208;Mast4-213	Mast4;Mast4;Mast4;Mast4;Mast4;Mast4;Mast4;Mast4	0;0;0;0;0;0;0;0	TRUE	FALSE	FALSE	FALSE	FALSE	TRUE	TRUE	FALSE	FALSE	Exon	6	8	328329	ENSMUSG00000034751	conserved gene and region
cg09670972	NA	0.786677	NA	NA	NA	NA	Ypel5	Ypel5_Exon	17	72848613	72848662	72848613	72848614	50	-	CGGGTCATGCTCACTGGCCGCCACATGGTTCGAGATGTGAGCTGCAAAAA	Exon (Ypel5-201/Ypel5, exon 3 of 3)	17	72836453	72851195	14743	1	Ypel5-201	12160	Ypel5-201;Ypel5-202;Ypel5-205;Ypel5-203;Ypel5-204	Ypel5;Ypel5;Ypel5;Ypel5;Ypel5	0;0;0;10242;7682	TRUE	FALSE	FALSE	FALSE	FALSE	TRUE	FALSE	FALSE	FALSE	Exon	2	2	383295	ENSMUSG00000039770	conserved gene and region
cg09681972	NA	NA	NA	NA	-0.856871369	NA	Hoxb8	Hoxb8_Exon	11	96284201	96284250	96284201	96284202	50	-	CGCTACCAGACCCTGGAGCTGGAGAAGGAGTTCCTATTTAATCCCTATCT	Exon (Hoxb8-201/Hoxb8, exon 2 of 2)	11	96281905	96285315	3411	1	Hoxb8-201	2296	Hoxb7-201;Hoxb7-202;Hoxb8-201;Hoxb8-202;Hoxb8-203	Hoxb7;Hoxb7;Hoxb8;Hoxb8;Hoxb8	0;-4465;0;0;0	TRUE	FALSE	FALSE	FALSE	FALSE	TRUE	FALSE	FALSE	FALSE	Exon	5	26	15416	ENSMUSG00000056648	mapped to different genes	11	96284141	96284202	62	*	62	7
cg09705951	NA	NA	NA	NA	-0.27277686	NA	Chd5	Chd5_Promoter	4	152338581	152338630	152338629	152338630	50	-	GAACGATGGGATGGGGTTGCCACAGCAACCAGACTGGACGTCACAATCCG	Promoter (<=1kb)	4	152338651	152390194	51544	1	Chd5-205	-70	Chd5-202;Chd5-205;Chd5-201;Chd5-204;Rpl22-204;Rpl22-208	Chd5;Chd5;Chd5;Chd5;Rpl22;Rpl22	0;0;0;0;12714;12712	FALSE	TRUE	TRUE	FALSE	FALSE	FALSE	FALSE	FALSE	FALSE	Promoter	2	7	269610	ENSMUSG00000005045	mapped to different genes	4	152338556	152339428	873	*	873	126
cg09710669	0.396172637	NA	NA	NA	NA	NA	Hnrnpa2b1	Hnrnpa2b1_fiveUTR	6	51469679	51469728	51469679	51469680	50	-	CGGACTCAGTCGCTTCAGCCCGATTTCCCGCAGCCGAGCGAGATGAGAGA	Promoter (<=1kb)	6	51460932	51469894	8963	2	Hnrnpa2b1-201	166	Cbx3-202;Cbx3-201;Cbx3-207;Cbx3-203;Cbx3-206;Cbx3-204;Cbx3-205;Hnrnpa2b1-201;Hnrnpa2b1-207;Hnrnpa2b1-202;Hnrnpa2b1-209;Hnrnpa2b1-204;Hnrnpa2b1-210;Hnrnpa2b1-203;Hnrnpa2b1-205;Hnrnpa2b1-212;Hnrnpa2b1-206;Hnrnpa2b1-213	Cbx3;Cbx3;Cbx3;Cbx3;Cbx3;Cbx3;Cbx3;Hnrnpa2b1;Hnrnpa2b1;Hnrnpa2b1;Hnrnpa2b1;Hnrnpa2b1;Hnrnpa2b1;Hnrnpa2b1;Hnrnpa2b1;Hnrnpa2b1;Hnrnpa2b1;Hnrnpa2b1	-632;-802;-935;-938;-949;-967;-1018;0;0;0;0;0;0;0;-2978;-3442;-3012;0	TRUE	FALSE	TRUE	TRUE	FALSE	TRUE	FALSE	FALSE	FALSE	fiveUTR	2	3	53379	ENSMUSG00000004980	conserved gene and region	6	51469204	51471252	2049	*	2049	223
cg09723377	NA	0.371851086	NA	NA	NA	NA	Dll1	Dll1_Promoter	17	15379007	15379056	15379007	15379008	50	-	CGCCATCAGCCCCCTAGCCAGCCATCTGCTCCGAACCAAATGGCGTTTTT	Promoter (2-3kb)	17	15374794	15376872	2079	2	Dll1-205	-2184	Dll1-201;Dll1-203;Dll1-202;Dll1-205	Dll1;Dll1;Dll1;Dll1	-3031;-4935;-3907;0	FALSE	TRUE	TRUE	FALSE	FALSE	FALSE	FALSE	FALSE	FALSE	Promoter	9	9	13388	ENSMUSG00000014773	conserved gene but different region
cg09731876	0.163469833	NA	NA	NA	NA	NA	Wdr7	Wdr7_Intron	18	63894303	63894352	63894351	63894352	50	-	TTAACTAACAACTCATTAGCTTAGTTGATGTTTTTGTCAATATTAATTCG	Intron (Wdr7-201/Wdr7, intron 21 of 27)	18	63708685	63989776	281092	1	Wdr7-201	185618	Gm19076-201;Wdr7-201;Wdr7-204	Gm19076;Wdr7;Wdr7	4679;0;0	TRUE	FALSE	FALSE	FALSE	FALSE	FALSE	TRUE	FALSE	FALSE	Intron	8	11	104082	ENSMUSG00000040560	conserved gene and region
cg09753325	NA	NA	NA	NA	-0.068959312	NA	Gmppa	Gmppa_Intergenic_downstream	1	75444399	75444448	75444447	75444448	50	-	CAGCTCCATCATAAATATGATAATTTAATTATTTTCTCAGCAAAACACCG	Downstream (1-2kb)	1	75442224	75443179	956	1	Gmppa-203	2224	Gmppa-201;Gmppa-202;Gmppa-210;Gmppa-206;Gmppa-211;Gmppa-208;Gmppa-204;Gmppa-213;Gmppa-205;Gmppa-207;Gmppa-203	Gmppa;Gmppa;Gmppa;Gmppa;Gmppa;Gmppa;Gmppa;Gmppa;Gmppa;Gmppa;Gmppa	8469;8456;8432;8431;8417;8415;8312;7457;2779;2233;2175	FALSE	TRUE	FALSE	FALSE	FALSE	FALSE	FALSE	FALSE	FALSE	Intergenic_downstream	2	2	69080	ENSMUSG00000033021	conserved gene but different region
cg09816441	0.220105907	NA	0.217683486	NA	NA	NA	C1ql1	C1ql1_Intron	11	102963183	102963232	102963231	102963232	50	+	AGCCTTAATATCTTACTTTGCAAATATAGTTTATTCCTTCAATAAAGCCG	Intron (2410004I01Rik-201/2410004I01Rik-201, intron 1 of 2)	11	102939264	102946688	7425	2	C1ql1-201	-16495	NA	NA	NA	TRUE	FALSE	FALSE	FALSE	FALSE	FALSE	TRUE	FALSE	FALSE	Intron	2	4	23829	ENSMUSG00000045532	conserved gene but different region
cg09817427	NA	NA	0.090416499	NA	0.681138011	NA	Tbx18	Tbx18_fiveUTR	9	87731214	87731263	87731262	87731263	50	+	TAATTGAAATTTGTTGCCTTGATCTGTCAGCACTTCCAGGCAGGAGAGCG	Promoter (<=1kb)	9	87702800	87731260	28461	2	Tbx18-201	0	Tbx18-201;Tbx18-202	Tbx18;Tbx18	0;-717	TRUE	FALSE	TRUE	TRUE	FALSE	TRUE	FALSE	FALSE	FALSE	fiveUTR	1	2	76365	ENSMUSG00000032419	conserved gene and region	9	87731262	87731433	172	*	172	13
cg09833650	NA	NA	NA	NA	1.540016343	NA	Gm12641	Gm12641_Intergenic_upstream	4	93054320	93054369	93054320	93054321	50	+	CGATTTATCCACTGACAAAATGTGCTAATGAAATGTCACCTTGGACAGCT	Distal Intergenic	4	93106988	93109914	2927	1	Gm12641-201	-52619	NA	NA	NA	FALSE	TRUE	FALSE	FALSE	FALSE	FALSE	FALSE	FALSE	TRUE	Intergenic_upstream	1	1	620269	NA	mapped to different genes
cg09841958	NA	NA	NA	NA	-0.289537415	NA	Barhl1	Barhl1_Exon	2	28911341	28911390	28911389	28911390	50	-	CCTGCGGTTCTGGTACCAGGTCTTGACCTGCGTGTCGGTGAGGTTGAGCG	Exon (Barhl1-201/Barhl1, exon 2 of 3)	2	28907679	28916412	8734	2	Barhl1-201	5022	Barhl1-201;Barhl1-204;Barhl1-203;Barhl1-202;Barhl1-205	Barhl1;Barhl1;Barhl1;Barhl1;Barhl1	0;0;0;0;0	TRUE	FALSE	FALSE	FALSE	FALSE	TRUE	TRUE	FALSE	FALSE	Exon	1	6	54422	ENSMUSG00000026805	conserved gene and region	2	28911288	28911611	324	*	324	29
cg09853111	NA	NA	-0.759099189	NA	NA	NA	Foxo6	Foxo6_Exon	4	120286865	120286914	120286865	120286866	50	-	CGCCTTTATCCTTGAAGTAGGGCACGTAACGGACCATCCAGTCGTAGATC	Promoter (<=1kb)	4	120267079	120287349	20271	2	Foxo6-201	435	Foxo6-201	Foxo6	0	TRUE	FALSE	TRUE	FALSE	FALSE	TRUE	FALSE	FALSE	FALSE	Exon	6	42	329934	ENSMUSG00000052135	conserved gene and region	4	120286820	120288190	1371	*	1371	160
cg09863012	NA	NA	NA	NA	-0.487802831	NA	Gm16415	Gm16415_Intergenic_downstream	18	42454236	42454285	42454236	42454237	50	-	CGAAACCTCTCTGCAAACTCTTTGTAGATTCCCATCTGTGACTTGATAAA	Distal Intergenic	18	42441019	42441507	489	1	Gm16415-201	13266	NA	NA	NA	FALSE	TRUE	FALSE	FALSE	FALSE	FALSE	FALSE	FALSE	TRUE	Intergenic_downstream	2	4	100042767	NA	mapped to different genes
cg09920422	-0.241563741	NA	NA	NA	NA	NA	Kdm7a	Kdm7a_Intron	6	39205433	39205482	39205481	39205482	50	+	GTTTAAATGCCTGTGAATCCCTCCCACGCCGGAGTCAAGAGGCTGTGGCG	Intron (Kdm7a-201/Kdm7a, intron 1 of 19)	6	39136623	39206789	70167	2	Kdm7a-201	1307	Kdm7a-201	Kdm7a	0	TRUE	FALSE	FALSE	FALSE	FALSE	FALSE	TRUE	FALSE	FALSE	Intron	7	8	338523	ENSMUSG00000042599	conserved gene and region	6	39205446	39207371	1926	*	1926	267
cg10004854	-0.126678025	NA	NA	NA	NA	NA	Ints6	Ints6_fiveUTR	14	62760636	62760685	62760684	62760685	50	+	ATCAGGAACAGTAAGATGGGCATAGTGCTGGCCGGGGACACCGGGGCCCG	Promoter (<=1kb)	14	62676330	62761112	84783	2	Ints6-201	427	Ints6-201;Ints6-202;Ints6-206;Ints6-205;Ints6-204	Ints6;Ints6;Ints6;Ints6;Ints6	0;0;0;0;0	TRUE	FALSE	TRUE	TRUE	FALSE	TRUE	TRUE	FALSE	FALSE	fiveUTR	3	6	18130	ENSMUSG00000035161	mapped to different genes	14	62760409	62760968	560	*	560	60
cg10049548	NA	0.14715971	NA	NA	NA	NA	C1ql4	C1ql4_Promoter	15	99089190	99089239	99089190	99089191	50	+	CGCGCTGCAGAGAGACACCCAGGTCCGTGTTTGGACTCCAATGTGACATA	Promoter (1-2kb)	15	99084086	99087817	3732	2	C1ql4-201	-1373	C1ql4-201;Dnajc22-202	C1ql4;Dnajc22	-1373;0	FALSE	TRUE	TRUE	FALSE	FALSE	FALSE	FALSE	FALSE	FALSE	Promoter	2	2	239659	ENSMUSG00000001076	conserved gene and region	15	99089170	99089287	118	*	118	10
cg10083965	NA	-0.012177413	NA	NA	NA	NA	Vegfa	Vegfa_Exon	17	46021017	46021066	46021065	46021066	50	+	CTGCCTCGCCTTGCAACGCGAGTCTGTGTTTTTGCAGGAACATTTACACG	Exon (Vegfa-202/Vegfa, exon 6 of 7)	17	46016993	46031815	14823	2	Vegfa-201	10749	Vegfa-201;Vegfa-202;Vegfa-210;Vegfa-207;Vegfa-205;Vegfa-208;Vegfa-204;Vegfa-206;Vegfa-203;Vegfa-209	Vegfa;Vegfa;Vegfa;Vegfa;Vegfa;Vegfa;Vegfa;Vegfa;Vegfa;Vegfa	0;0;0;0;0;0;0;0;0;10290	TRUE	FALSE	FALSE	FALSE	FALSE	TRUE	TRUE	FALSE	FALSE	Exon	5	7	22339	ENSMUSG00000023951	conserved gene and region
cg10103348	0.278555987	NA	NA	NA	NA	NA	Msl2	Msl2_Exon	9	101075338	101075387	101075338	101075339	50	+	CGACCCCGGAGACCCCAAGGCGTTTACTGAGATTAACAGGCTCTTGCCTT	Exon (Msl2-202/Msl2, exon 1 of 3)	9	101074101	101101785	27685	1	Msl2-202	1237	Msl2-202;Msl2-201	Msl2;Msl2	0;0	TRUE	FALSE	FALSE	FALSE	FALSE	TRUE	FALSE	FALSE	FALSE	Exon	12	19	77853	ENSMUSG00000066415	conserved gene and region	9	101075182	101075428	247	*	247	16
cg10168186	NA	NA	0.58753185	NA	NA	NA	Crtc2	Crtc2_threeUTR	3	90262936	90262985	90262984	90262985	50	-	CTTGACCCGTTCTCTTCCTGGCATGCACATGCTCTGGCCCAGCAGGTACG	3' UTR	3	90254163	90264125	9963	1	Crtc2-201	8773	Crtc2-201;Crtc2-203;Crtc2-206;Crtc2-202;Crtc2-205;Crtc2-208;Crtc2-204;Crtc2-207;Dennd4b-202;Dennd4b-201;Dennd4b-207	Crtc2;Crtc2;Crtc2;Crtc2;Crtc2;Crtc2;Crtc2;Crtc2;Dennd4b;Dennd4b;Dennd4b	0;0;0;8612;0;0;4885;3971;-2200;-3529;-4476	TRUE	FALSE	FALSE	FALSE	TRUE	TRUE	TRUE	FALSE	FALSE	threeUTR	1	5	74343	ENSMUSG00000027936	conserved gene but different region
cg10187298	NA	NA	NA	NA	-0.813527037	NA	Dnajc22	Dnajc22_Promoter	15	99093629	99093678	99093629	99093630	50	-	CGCGGCCTTTATTAGGGATTCCGCGGCTGTCGGTCCCGCCATCCATCCTG	Promoter (<=1kb)	15	99093170	99100917	7748	1	Dnajc22-202	459	Dnajc22-202	Dnajc22	0	TRUE	FALSE	TRUE	FALSE	FALSE	FALSE	TRUE	FALSE	FALSE	Promoter	6	8	72778	ENSMUSG00000038009	conserved gene and region	15	99093593	99093959	367	*	367	36
cg10196526	NA	0.04281146	NA	NA	NA	NA	Cadps	Cadps_Intron	14	12389021	12389070	12389069	12389070	50	-	CATGTTACAGGAAGCCACAGCTCGCCCCAGGGGTGCTGCAAACAGACACG	Intron (Cadps-210/Cadps, intron 27 of 28)	14	12372563	12823053	450491	2	Cadps-210	433983	Cadps-210;Cadps-202;Cadps-203;Cadps-204;Cadps-201;Cadps-212;Cadps-208	Cadps;Cadps;Cadps;Cadps;Cadps;Cadps;Cadps	0;0;0;0;0;0;0	TRUE	FALSE	FALSE	FALSE	FALSE	FALSE	TRUE	FALSE	FALSE	Intron	17	34	27062	ENSMUSG00000054423	mapped to different genes
cg10198934	0.076775622	NA	NA	NA	NA	NA	Rhbdf2	Rhbdf2_Exon	11	116601885	116601934	116601933	116601934	50	+	TCACCGAGCTGGGGCCAACCCAGAAGTTCTCCTGCTGGATGTACTTCACG	Exon (Rhbdf2-202/Rhbdf2, exon 11 of 19)	11	116598165	116624200	26036	2	Rhbdf2-202	22266	Aanat-204;Aanat-201;Aanat-205;Aanat-202;Rhbdf2-202;Rhbdf2-201;Rhbdf2-204;Rhbdf2-203	Aanat;Aanat;Aanat;Aanat;Rhbdf2;Rhbdf2;Rhbdf2;Rhbdf2	15453;8198;8198;6309;0;0;0;22313	TRUE	FALSE	FALSE	FALSE	FALSE	TRUE	TRUE	FALSE	FALSE	Exon	2	2	217344	ENSMUSG00000020806	conserved gene and region
cg10202353	NA	0.03720957	NA	NA	NA	NA	Casz1	Casz1_Intron	4	148925142	148925191	148925190	148925191	50	+	TATCAGTAAATTATTTATTGTAGCAATCTGCTGCACCATTTTACCCATCG	Intron (Casz1-201/Casz1, intron 4 of 15)	4	148804429	148945129	140701	1	Casz1-201	120713	Casz1-201;Casz1-202;Casz1-206	Casz1;Casz1;Casz1	0;0;0	TRUE	FALSE	FALSE	FALSE	FALSE	FALSE	TRUE	FALSE	FALSE	Intron	94	124	69743	ENSMUSG00000028977	mapped to different genes
cg10221809	NA	-0.022500051	NA	NA	NA	NA	Ttll11	Ttll11_Intergenic_upstream	2	36011609	36011658	36011657	36011658	50	+	ATCAGGGCCTTATTCATTAGCGCATAAACAATTTTGTTTCTCGGCACTCG	Distal Intergenic	2	35902351	35979913	77563	2	Ttll11-203	-31696	NA	NA	NA	FALSE	TRUE	FALSE	FALSE	FALSE	FALSE	FALSE	FALSE	TRUE	Intergenic_upstream	7	7	74410	ENSMUSG00000026885	mapped to different genes	2	36011629	36011763	135	*	135	19
cg10238356	0.168888696	NA	NA	NA	NA	NA	Lamp2	Lamp2_Exon	X	38405525	38405574	38405525	38405526	50	-	CGCTATGGGCACAAGGAAGTTGTCGTCATCTGCACTGCAGTCTTGAGCTA	Exon (Lamp2-201/Lamp2, exon 9 of 9)	20	38401357	38456454	55098	2	Lamp2-203	50880	Lamp2-203;Lamp2-201	Lamp2;Lamp2	0;0	TRUE	FALSE	FALSE	FALSE	FALSE	TRUE	TRUE	FALSE	FALSE	Exon	1	1	16784	ENSMUSG00000016534	conserved gene but different region
cg10241757	NA	NA	NA	NA	-1.676078883	-0.789045322	Cdk6	Cdk6_Promoter	5	3342421	3342470	3342421	3342422	50	-	CGGCTGCAGCCTTTGTAGTCGCGGAGGAATGCGGAAATGTTGAAGCACTA	Promoter (<=1kb)	5	3341485	3344453	2969	1	Cdk6-205	936	Cdk6-205;Cdk6-204;Cdk6-202;Cdk6-203;Cdk6-201	Cdk6;Cdk6;Cdk6;Cdk6;Cdk6	0;-1262;0;-1446;0	TRUE	FALSE	TRUE	FALSE	FALSE	FALSE	TRUE	FALSE	FALSE	Promoter	1	2	12571	ENSMUSG00000040274	conserved gene and region
cg10250869	NA	NA	NA	NA	-0.758174395	NA	Vwc2l	Vwc2l_fiveUTR	1	70725746	70725795	70725794	70725795	50	-	GGGCTCAGAAGCCAGTTGTTGGCGCTGTCCGTGGTGCTGAGGAATTCCCG	Promoter (<=1kb)	1	70725752	70732202	6451	1	Vwc2l-202	0	Spag16-201;Spag16-204;Vwc2l-201;Vwc2l-202;Vwc2l-203;Vwc2l-204	Spag16;Spag16;Vwc2l;Vwc2l;Vwc2l;Vwc2l	898758;774125;0;0;0;0	TRUE	FALSE	TRUE	TRUE	FALSE	TRUE	FALSE	FALSE	FALSE	fiveUTR	3	6	320460	ENSMUSG00000045648	conserved gene and region	1	70725715	70725871	157	*	157	10
cg10277837	NA	0.19423341	NA	NA	NA	NA	Gm28308	Gm28308_fiveUTR	6	52191674	52191723	52191722	52191723	50	-	CGAGCTCATGGTCATTAATTTGTGAAGTGCAAAAATACTAATTTTTCTCG	5' UTR	6	52163359	52213339	49981	2	Gm28308-201	21616	Gm28308-201;Hoxa3-201;Hoxa4-201	Gm28308;Hoxa3;Hoxa4	0;0;0	TRUE	FALSE	FALSE	TRUE	FALSE	TRUE	TRUE	FALSE	FALSE	fiveUTR	21	103	NA	NA	mapped to different genes
cg10405727	NA	0.13147413	NA	0.000125662	NA	NA	Gm4828	Gm4828_Intergenic_downstream	17	4907142	4907191	4907142	4907143	50	-	CGCTTAGAAATAGAAATGCATTTTCAATAAGTATTTATTATGTTGTTCTG	Distal Intergenic	17	4880626	4881115	490	1	Gm4828-201	26565	NA	NA	NA	FALSE	TRUE	FALSE	FALSE	FALSE	FALSE	FALSE	FALSE	TRUE	Intergenic_downstream	3	3	224460	NA	mapped to different genes
cg10429476	0.201769353	NA	NA	NA	NA	NA	Itgb3	Itgb3_Exon	11	104633427	104633476	104633427	104633428	50	+	CGGCAGGTGGAGGATTACCCTGTGGACATCTACTACTTGATGGACCTGTC	Exon (Itgb3-201/Itgb3, exon 4 of 15)	11	104608000	104670476	62477	1	Itgb3-201	25427	Itgb3-201;Itgb3-202	Itgb3;Itgb3	0;-3913	TRUE	FALSE	FALSE	FALSE	FALSE	TRUE	FALSE	FALSE	FALSE	Exon	1	1	16416	ENSMUSG00000020689	conserved gene and region
cg10456584	-0.230695019	NA	NA	NA	NA	NA	Pcbp1	Pcbp1_Exon	6	86525412	86525461	86525460	86525461	50	-	CTCCAGCATGACCAGGCAAATCTGCTTGACACACTCGGTGACAGACTGCG	Promoter (<=1kb)	6	86524492	86526321	1830	2	Pcbp1-201	860	Pcbp1-201	Pcbp1	0	TRUE	FALSE	TRUE	FALSE	FALSE	TRUE	FALSE	FALSE	FALSE	Exon	14	15	23983	ENSMUSG00000051695	mapped to different genes	6	86525220	86525644	425	*	425	38
cg10530153	-0.266707035	NA	NA	NA	NA	NA	Gbf1	Gbf1_fiveUTR	19	46152508	46152557	46152508	46152509	50	+	CGCAGTTACCAGGCAGCGGGCTAGACTGAGGCTAGTTACCACGTCAGTGA	Promoter (<=1kb)	19	46152509	46286510	134002	1	Gbf1-201	0	Gbf1-201;Gbf1-204;Gbf1-214;Gbf1-207;Gbf1-216;Pitx3-201	Gbf1;Gbf1;Gbf1;Gbf1;Gbf1;Pitx3	0;0;0;0;-23;-4182	TRUE	FALSE	TRUE	TRUE	FALSE	TRUE	FALSE	FALSE	FALSE	fiveUTR	2	18	107338	ENSMUSG00000025224	conserved gene but different region	19	46152414	46152595	182	*	182	13
cg10566829	0.40195633	NA	NA	NA	NA	NA	Sfmbt2	Sfmbt2_Exon	2	10373709	10373758	10373709	10373710	50	+	CGTGCCAGTTTCAATATGGCGGGCTAAGGTGGCTTTTAAAAACTGAAAAT	Exon (Gm13261-201/Gm13261-201, exon 1 of 4)	2	10370510	10439137	68628	1	Sfmbt2-203	3199	Sfmbt2-203;Sfmbt2-202;Sfmbt2-206;Sfmbt2-204;Sfmbt2-205;Sfmbt2-207;Sfmbt2-201	Sfmbt2;Sfmbt2;Sfmbt2;Sfmbt2;Sfmbt2;Sfmbt2;Sfmbt2	0;0;0;0;0;0;0	TRUE	FALSE	FALSE	FALSE	FALSE	TRUE	TRUE	FALSE	FALSE	Exon	3	3	353282	ENSMUSG00000061186	conserved gene but different region
cg10570730	NA	NA	NA	0.059138208	NA	NA	Zfp536	Zfp536_Intron	7	37532840	37532889	37532840	37532841	50	+	CGCTGCAGACCCACTCATTGAGTAAGAGCCAACAGCATATGATTGTGTTA	Intron (Zfp536-211/Zfp536, intron 1 of 3)	7	37318024	37568390	250367	2	Zfp536-211	35501	Zfp536-211;Zfp536-202;Zfp536-201;Zfp536-203;Zfp536-206	Zfp536;Zfp536;Zfp536;Zfp536;Zfp536	0;0;0;0;0	TRUE	FALSE	FALSE	FALSE	FALSE	FALSE	TRUE	FALSE	FALSE	Intron	73	112	243937	ENSMUSG00000043456	conserved gene and region
cg10583293	0.043044543	NA	NA	NA	NA	NA	Nr2f2	Nr2f2_Intergenic_downstream	7	70123058	70123107	70123058	70123059	50	+	CGTCAGATTAAGCCCTTGCACAGAGAAGATATGAAAAGCATTTCTAATTA	Distal Intergenic	7	70353074	70355237	2164	2	Nr2f2-203	232130	NA	NA	NA	FALSE	TRUE	FALSE	FALSE	FALSE	FALSE	FALSE	FALSE	TRUE	Intergenic_downstream	19	69	11819	ENSMUSG00000030551	mapped to different genes
cg10587356	-1.565861533	NA	NA	NA	NA	NA	Dot1l	Dot1l_threeUTR	10	80778273	80778322	80778321	80778322	50	+	GTGAATAATTTTGCCTTTGGTCCTGAGGTGGATCACCAGCTGAAGGAGCG	3' UTR	10	80755206	80795461	40256	1	Dot1l-201	23067	Dot1l-201;Dot1l-202;Dot1l-206	Dot1l;Dot1l;Dot1l	0;0;0	TRUE	FALSE	FALSE	FALSE	TRUE	TRUE	FALSE	FALSE	FALSE	threeUTR	3	3	208266	ENSMUSG00000061589	conserved gene but different region
cg10593080	NA	NA	NA	NA	-0.953210714	NA	Syt1	Syt1_fiveUTR	10	109010930	109010979	109010978	109010979	50	+	GAGCATCCCCACACTGCAGCTTCTCCAGGAATCCCTCCAGTGAGGAGGCG	Promoter (<=1kb)	10	108497650	109010975	513326	2	Syt1-202	0	Syt1-202;Syt1-201;Syt1-206;Syt1-204;Syt1-203	Syt1;Syt1;Syt1;Syt1;Syt1	0;0;-1819;0;-1830	TRUE	FALSE	TRUE	TRUE	FALSE	TRUE	FALSE	FALSE	FALSE	fiveUTR	2	5	20979	ENSMUSG00000035864	conserved gene but different region
cg10620616	NA	NA	NA	NA	-0.5978598	NA	Evx1	Evx1_Exon	6	52314794	52314843	52314794	52314795	50	+	CGCCAGGTCGGAAATGGTCCCAATGGTCTAATTGCCTTTGGTCTCCGGTT	Exon (Evx1os-201/Evx1os-201, exon 1 of 4)	6	52313498	52318378	4881	1	Evx1-201	1296	Evx1-201;Evx1-202	Evx1;Evx1	0;0	TRUE	FALSE	FALSE	FALSE	FALSE	TRUE	TRUE	FALSE	FALSE	Exon	4	19	14028	ENSMUSG00000005503	mapped to different genes	6	52314451	52314858	408	*	408	26
cg10651829	0.290033579	NA	NA	NA	NA	NA	Evx1	Evx1_fiveUTR	6	52313580	52313629	52313580	52313581	50	-	CGATTGCAGCAGGAGGATGACAGCTTAGAAAGAAGAGGGCAATGGGGCTT	Promoter (<=1kb)	6	52313498	52318378	4881	1	Evx1-201	82	Evx1-201;Evx1-202	Evx1;Evx1	0;0	TRUE	FALSE	TRUE	TRUE	FALSE	TRUE	TRUE	FALSE	FALSE	fiveUTR	7	19	14028	ENSMUSG00000005503	mapped to different genes	6	52313448	52313581	134	*	134	12
cg10654522	NA	NA	NA	0.014513047	NA	NA	Gsx2	Gsx2_Intergenic_downstream	5	75082615	75082664	75082663	75082664	50	-	ACTAGTTTCAGATTAATGAAGCAGTGACAATTTCAATCTGCTTAAAGGCG	Distal Intergenic	5	75075602	75077625	2024	1	Gsx2-202	7062	Gsx2-201;Gsx2-202	Gsx2;Gsx2	7014;7013	FALSE	TRUE	FALSE	FALSE	FALSE	FALSE	FALSE	FALSE	TRUE	Intergenic_downstream	5	10	14843	ENSMUSG00000035946	mapped to different genes
cg10711876	NA	NA	-0.160966408	NA	NA	NA	Calcoco1	Calcoco1_threeUTR	15	102707927	102707976	102707927	102707928	50	+	CGTCTGCTGCCTAATGAGGCTGAAAATGAGTCTGACATCGTCCTTCATCT	3' UTR	15	102706777	102722178	15402	2	Calcoco1-201	14202	Calcoco1-201;Calcoco1-203;Calcoco1-205;Calcoco1-204;Calcoco1-209;Calcoco1-207;Calcoco1-202;Calcoco1-206;Calcoco1-208	Calcoco1;Calcoco1;Calcoco1;Calcoco1;Calcoco1;Calcoco1;Calcoco1;Calcoco1;Calcoco1	0;0;0;0;2084;11740;7820;11740;6566	TRUE	FALSE	FALSE	FALSE	TRUE	TRUE	TRUE	FALSE	FALSE	threeUTR	1	29	67488	ENSMUSG00000023055	conserved gene and region
cg10718356	NA	-0.027267997	NA	NA	NA	NA	Cbx4	Cbx4_Promoter	11	119085403	119085452	119085403	119085404	50	+	CGGTGGAGGGAAAGGGGAAAGGAGCCATTTTCTGCTGCACATCAGTCAGT	Promoter (<=1kb)	11	119077573	119086221	8649	2	Cbx4-201	769	Cbx4-201;Cbx4-202	Cbx4;Cbx4	0;0	TRUE	FALSE	TRUE	FALSE	FALSE	FALSE	TRUE	FALSE	FALSE	Promoter	2	2	12418	ENSMUSG00000039989	conserved gene and region
cg10724086	-0.200347449	NA	NA	NA	NA	NA	Foxa1	Foxa1_Exon	12	57546784	57546833	57546784	57546785	50	+	CGGCTAAGAGCAGGTGAGTCACAGCACCGGTTTATATCTTTATGACATAA	Promoter (<=1kb)	12	57545834	57546916	1083	2	Foxa1-202	83	Foxa1-201;Foxa1-202	Foxa1;Foxa1	0;0	TRUE	FALSE	TRUE	FALSE	FALSE	TRUE	FALSE	FALSE	FALSE	Exon	2	7	15375	ENSMUSG00000035451	mapped to different genes	12	57546636	57546961	326	*	326	19
cg10732227	NA	NA	-0.14439104	NA	NA	NA	Brd1	Brd1_Exon	15	88712775	88712824	88712775	88712776	50	+	CGGTGTCCCTGGCATTGTACTTCATGCAGTTATCTATAATGAGATCAAAA	Exon (Brd1-203/Brd1, exon 6 of 13)	15	88687034	88734233	47200	2	Brd1-203	21409	Brd1-203;Brd1-202;Brd1-201;Brd1-206;Brd1-204	Brd1;Brd1;Brd1;Brd1;Brd1	0;0;0;6331;4216	TRUE	FALSE	FALSE	FALSE	FALSE	TRUE	FALSE	FALSE	FALSE	Exon	5	5	223770	ENSMUSG00000022387	conserved gene and region	15	88712636	88712776	141	*	141	10
cg10740273	NA	0.057344389	NA	NA	NA	NA	Fam120a	Fam120a_Exon	13	48910374	48910423	48910374	48910375	50	+	CGGAGGCAGGTCCTTGTTGGCTTCATCTTCAATAGAAACAGCAATTTTGA	Exon (Fam120a-201/Fam120a, exon 10 of 18)	13	48879219	48968017	88799	2	Fam120a-201	57594	Fam120a-201	Fam120a	0	TRUE	FALSE	FALSE	FALSE	FALSE	TRUE	FALSE	FALSE	FALSE	Exon	7	8	218236	ENSMUSG00000038014	conserved gene and region
cg10763467	NA	NA	0.076400798	NA	NA	NA	Evx2	Evx2_Intergenic_downstream	2	74651194	74651243	74651242	74651243	50	-	GCATTACTCGCAGTCAGCTAAATGAAACATTATTCTAAACATATGCATCG	Distal Intergenic	2	74655616	74659419	3804	2	Evx2-202	8225	Evx2-201;Evx2-202	Evx2;Evx2	0;8176	FALSE	TRUE	FALSE	FALSE	FALSE	FALSE	FALSE	FALSE	TRUE	Intergenic_downstream	17	35	14029	ENSMUSG00000001815	conserved gene and region
cg10797933	-1.146870419	NA	NA	NA	NA	NA	Son	Son_Exon	16	91656300	91656349	91656348	91656349	50	+	CGCTGGAGATCTCTGTTCAGTCTGTGGTGACAACATCGGAGCTGTCAACG	Exon (Son-203/Son, exon 3 of 12)	16	91647506	91679207	31702	1	Son-203	8794	Son-203;Son-204;Son-202;Son-208;Son-201;Son-205;Son-212	Son;Son;Son;Son;Son;Son;Son	0;0;0;0;0;0;0	TRUE	FALSE	FALSE	FALSE	FALSE	TRUE	TRUE	FALSE	FALSE	Exon	14	31	20658	ENSMUSG00000022961	conserved gene and region
cg10823530	NA	-0.407470612	NA	NA	NA	NA	Prpf4b	Prpf4b_threeUTR	13	34901987	34902036	34901987	34901988	50	+	CGTTTTCCTAGGTGTGTGTGTGCAGGCCACAGCAGCATGCCCTTGGTGTA	3' UTR	13	34875302	34906064	30763	1	Prpf4b-201	26685	Prpf4b-201;Prpf4b-208;Prpf4b-202;Prpf4b-203;Prpf4b-210;Prpf4b-207;Prpf4b-204;Prpf4b-205;Prpf4b-209	Prpf4b;Prpf4b;Prpf4b;Prpf4b;Prpf4b;Prpf4b;Prpf4b;Prpf4b;Prpf4b	0;0;0;9863;0;0;0;0;0	TRUE	FALSE	FALSE	FALSE	TRUE	TRUE	TRUE	FALSE	FALSE	threeUTR	4	4	19134	ENSMUSG00000021413	mapped to different genes
cg10866847	NA	-0.161282189	NA	NA	NA	NA	Ctdspl	Ctdspl_Exon	9	119031794	119031843	119031794	119031795	50	+	CGAAGGCCGTGGCCTCGTTCAAGTAATCCAGGATAGGCTGTGCAGGTCCC	Exon (Mir26a-1-201/Mir26a-1-201, exon 1 of 1)	9	118926453	119043998	117546	1	Ctdspl-201	105341	Ctdspl-201;Ctdspl-202;Ctdspl-204;Ctdspl-203	Ctdspl;Ctdspl;Ctdspl;Ctdspl	0;0;0;0	TRUE	FALSE	FALSE	FALSE	FALSE	TRUE	TRUE	FALSE	FALSE	Exon	6	7	69274	ENSMUSG00000047409	conserved gene but different region
cg10918171	NA	-0.008074808	NA	-0.573890877	NA	NA	Dll1	Dll1_Promoter	17	15377007	15377056	15377055	15377056	50	+	ATTAAGGCAGCCTGTTATTGTGCGAGGCTGAATCAGTGGCTCTTTGTGCG	Promoter (<=1kb)	17	15374794	15376872	2079	2	Dll1-205	-135	Dll1-201;Dll1-203;Dll1-202;Dll1-205	Dll1;Dll1;Dll1;Dll1	-1031;-2935;-1907;0	FALSE	TRUE	TRUE	FALSE	FALSE	FALSE	FALSE	FALSE	FALSE	Promoter	9	9	13388	ENSMUSG00000014773	conserved gene but different region
cg10918927	NA	NA	NA	NA	-0.686545797	NA	Hoxc5	Hoxc5_Exon	15	102998766	102998815	102998766	102998767	50	+	CGCTCGGTAAGTGTTTCCTTATTGGTTCAAATATGTAACTAATGGTCCGT	Exon (Hoxc6-202/Hoxc6, exon 1 of 3)	15	102967443	103015676	48234	1	Hoxc5-202	31323	Hoxc5-202;Hoxc6-202;Hoxc6-203;Hoxc8-201;Hoxc8-202	Hoxc5;Hoxc6;Hoxc6;Hoxc8;Hoxc8	0;0;0;0;0	TRUE	FALSE	FALSE	FALSE	FALSE	TRUE	TRUE	FALSE	FALSE	Exon	72	134	15424	ENSMUSG00000022485	mapped to different genes
cg10974737	NA	NA	0.168482351	NA	NA	NA	Rbm39	Rbm39_threeUTR	2	156178858	156178907	156178858	156178859	50	-	CGATAAGTCACTCAATTACTACCTTATGATTGACAGTTCACACTGGAATC	3' UTR	2	156147239	156180238	33000	2	Rbm39-203	1331	Rbm39-203;Rbm39-217;Rbm39-215;Rbm39-201;Rbm39-225;Rbm39-223;Rbm39-204;Rbm39-216;Rbm39-213;Rbm39-214;Rbm39-218;Rbm39-219;Rbm39-210;Rbm39-224;Rbm39-212;Rbm39-202;Rbm39-208;Rbm39-222;Rbm39-205;Rbm39-211	Rbm39;Rbm39;Rbm39;Rbm39;Rbm39;Rbm39;Rbm39;Rbm39;Rbm39;Rbm39;Rbm39;Rbm39;Rbm39;Rbm39;Rbm39;Rbm39;Rbm39;Rbm39;Rbm39;Rbm39	0;0;0;0;0;0;0;0;0;0;0;0;0;0;0;0;0;0;0;0	TRUE	FALSE	FALSE	FALSE	TRUE	TRUE	TRUE	FALSE	FALSE	threeUTR	11	13	170791	ENSMUSG00000027620	conserved gene but different region
cg10992228	NA	NA	NA	NA	0.093882989	NA	Dcakd	Dcakd_Intron	11	102998933	102998982	102998981	102998982	50	+	AACTGGGACTGTGGAAGCCACAGCTGTCGTCCTCATTTTTCACCTTATCG	Intron (Dcakd-201/Dcakd, intron 3 of 4)	11	102994047	103017168	23122	2	Dcakd-201	18186	Dcakd-201;Dcakd-203;Dcakd-205	Dcakd;Dcakd;Dcakd	0;-1385;29322	TRUE	FALSE	FALSE	FALSE	FALSE	FALSE	TRUE	FALSE	FALSE	Intron	1	4	68087	ENSMUSG00000020935	conserved gene and region
cg11039901	NA	NA	NA	NA	-1.651643411	NA	Gabrb2	Gabrb2_Exon	11	42602196	42602245	42602196	42602197	50	+	CGGACTACCAATTACGATTTCTCTCTGTATACGGTTAGATAGCCAGTTTT	Exon (Gabrb2-205/Gabrb2, exon 9 of 10)	11	42419757	42629028	209272	1	Gabrb2-201	182439	Gabrb2-201;Gabrb2-205	Gabrb2;Gabrb2	0;0	TRUE	FALSE	FALSE	FALSE	FALSE	TRUE	TRUE	FALSE	FALSE	Exon	3	5	14401	ENSMUSG00000007653	conserved gene and region
cg11066411	NA	0.367422176	NA	NA	0.966854229	0.420603304	Faxc	Faxc_Exon	4	21931665	21931714	21931713	21931714	50	-	GCCCTTCTCCTTTTATGGGGACATCATCGCTTTCCCTTTGCAGGATTACG	Promoter (<=1kb)	4	21931329	21994146	62818	1	Faxc-204	336	Faxc-204;Faxc-201;Faxc-202;Faxc-203	Faxc;Faxc;Faxc;Faxc	0;0;0;0	TRUE	FALSE	TRUE	FALSE	FALSE	TRUE	FALSE	FALSE	FALSE	Exon	5	5	76132	ENSMUSG00000028246	conserved gene and region	4	21931002	21931985	984	*	984	98
cg11084334	NA	NA	NA	NA	1.10873943	0.147374218	Lhfpl4	Lhfpl4_Exon	6	113194076	113194125	113194124	113194125	50	+	TGTCGCCCACCCAGTAGGGCTGGATGAAGACCACCACGTTGATGATGGCG	Exon (Lhfpl4-201/Lhfpl4, exon 2 of 4)	6	113168090	113195384	27295	2	Lhfpl4-201	1259	Lhfpl4-201;Lhfpl4-202	Lhfpl4;Lhfpl4	0;0	TRUE	FALSE	FALSE	FALSE	FALSE	TRUE	FALSE	FALSE	FALSE	Exon	7	7	269788	ENSMUSG00000042873	conserved gene and region	6	113193884	113194365	482	*	482	42
cg11115159	0.296914941	NA	NA	NA	NA	NA	Fgf8	Fgf8_Intron	19	45737793	45737842	45737793	45737794	50	+	CGAGGGGCTGGGCCTGCGGCTTACTGAACATTCCAAATGCTGGTACCATG	Intron (Fgf8-201/Fgf8, intron 5 of 5)	19	45736798	45742874	6077	2	Fgf8-201	5032	Fgf8-201;Fgf8-206;Fgf8-202;Fgf8-205;Fgf8-203;Fgf8-204	Fgf8;Fgf8;Fgf8;Fgf8;Fgf8;Fgf8	0;0;0;0;0;0	TRUE	FALSE	FALSE	FALSE	FALSE	FALSE	TRUE	FALSE	FALSE	Intron	4	18	14179	ENSMUSG00000025219	conserved gene and region
cg11134207	NA	0.269937612	NA	NA	NA	NA	Acss2	Acss2_threeUTR	2	155561766	155561815	155561814	155561815	50	-	ATTGCCACACCAGACTACATCCAGAATGCACCTGGCTTGCCTAAAACCCG	3' UTR	2	155517948	155562746	44799	1	Acss2-201	43818	Acss2-201;Acss2-202;Acss2-203;Acss2-205;Acss2-209;Gss-201;Gss-203;Gss-208;Gss-205	Acss2;Acss2;Acss2;Acss2;Acss2;Gss;Gss;Gss;Gss	0;0;0;0;12534;30995;30899;11189;12568	TRUE	FALSE	FALSE	FALSE	TRUE	TRUE	FALSE	FALSE	FALSE	threeUTR	1	1	60525	ENSMUSG00000027605	conserved gene and region
cg11145593	NA	0.231869015	NA	NA	NA	NA	Mef2c	Mef2c_fiveUTR	13	83575651	83575700	83575651	83575652	50	+	CGAGAGAGAGAAGAAAAACGGGGACTATGGGGAGAAAAAAGATTCAGATT	Promoter (<=1kb)	13	83575677	83662631	86955	1	Mef2c-219	0	Mef2c-218;Mef2c-228;Mef2c-221;Mef2c-229;Mef2c-201;Mef2c-202;Mef2c-207;Mef2c-231;Mef2c-222;Mef2c-223;Mef2c-227;Mef2c-217;Mef2c-213;Mef2c-214;Mef2c-215;Mef2c-226;Mef2c-216;Mef2c-208;Mef2c-206;Mef2c-212;Mef2c-210;Mef2c-203;Mef2c-205;Mef2c-224;Mef2c-204;Mef2c-219;Mef2c-225	Mef2c;Mef2c;Mef2c;Mef2c;Mef2c;Mef2c;Mef2c;Mef2c;Mef2c;Mef2c;Mef2c;Mef2c;Mef2c;Mef2c;Mef2c;Mef2c;Mef2c;Mef2c;Mef2c;Mef2c;Mef2c;Mef2c;Mef2c;Mef2c;Mef2c;Mef2c;Mef2c	0;0;0;0;0;0;0;0;0;0;0;0;0;0;0;0;0;0;0;0;0;0;0;0;0;0;0	TRUE	FALSE	TRUE	TRUE	FALSE	TRUE	TRUE	FALSE	FALSE	fiveUTR	9	41	17260	ENSMUSG00000005583	conserved gene and region
cg11160926	-0.133866467	NA	NA	NA	NA	NA	Msantd1	Msantd1_Exon	5	34921380	34921429	34921428	34921429	50	-	TGGCTCTTGTGTCTCTCGTTTCAGGAAATTAAAATGCATGACAGATAGCG	Exon (Msantd1-204/Msantd1, exon 3 of 4)	5	34915088	34923564	8477	1	Msantd1-204	6292	Msantd1-202;Msantd1-204;Msantd1-201;Msantd1-203	Msantd1;Msantd1;Msantd1;Msantd1	0;0;0;0	TRUE	FALSE	FALSE	FALSE	FALSE	TRUE	TRUE	FALSE	FALSE	Exon	1	4	403174	ENSMUSG00000051246	conserved gene and region
cg11168180	NA	NA	NA	-1.01946269	NA	NA	Egln1	Egln1_Exon	8	124914086	124914135	124914134	124914135	50	-	AATTTGGGTTCAATGTCAGCAAACTGGGCTTTGCCTTCTGGAAAAATTCG	Exon (Egln1-201/Egln1, exon 3 of 5)	8	124908587	124949324	40738	2	Egln1-201	35189	Egln1-201	Egln1	0	TRUE	FALSE	FALSE	FALSE	FALSE	TRUE	FALSE	FALSE	FALSE	Exon	2	2	112405	ENSMUSG00000031987	conserved gene and region
cg11202178	NA	NA	-0.102125654	NA	NA	NA	Pcdh1	Pcdh1_threeUTR	18	38188282	38188331	38188330	38188331	50	-	AGCCCTCCCACCCCCTGAGATCAAGGCAATGGTGGTTTTACAGGCTGACG	3' UTR	18	38185914	38212053	26140	2	Pcdh1-203	23722	Pcdh1-203;Pcdh1-204	Pcdh1;Pcdh1	0;0	TRUE	FALSE	FALSE	FALSE	TRUE	TRUE	FALSE	FALSE	FALSE	threeUTR	10	17	75599	ENSMUSG00000051375	conserved gene but different region
cg11209121	NA	NA	NA	NA	-0.02167803	NA	Nr4a2	Nr4a2_Exon	2	57112374	57112423	57112422	57112423	50	+	GTAGCTCTGAGAAGCGGGGCTGGCTCCTTGAGGCGAGGACCCATACTGCG	Exon (Nr4a2-201/Nr4a2, exon 3 of 8)	2	57106830	57115038	8209	2	Nr4a2-201	2615	Nr4a2-201;Nr4a2-203;Nr4a2-206;Nr4a2-202;Nr4a2-205;Nr4a2-204	Nr4a2;Nr4a2;Nr4a2;Nr4a2;Nr4a2;Nr4a2	0;0;0;0;0;1950	TRUE	FALSE	FALSE	FALSE	FALSE	TRUE	TRUE	FALSE	FALSE	Exon	10	25	18227	ENSMUSG00000026826	conserved gene and region
cg11218107	0.142359315	NA	NA	NA	NA	NA	Slc9a5	Slc9a5_Exon	8	105355873	105355922	105355921	105355922	50	-	GGGGCAGCCGTGGGCTTAGTCTTTGCCTTCCTCCTGGCCCTGACCACACG	Exon (Slc9a5-201/Slc9a5, exon 5 of 16)	8	105348843	105368743	19901	1	Slc9a5-201	7030	Slc9a5-201;Slc9a5-202	Slc9a5;Slc9a5	0;0	TRUE	FALSE	FALSE	FALSE	FALSE	TRUE	FALSE	FALSE	FALSE	Exon	2	2	277973	ENSMUSG00000014786	conserved gene and region	8	105355921	105356095	175	*	175	13
cg11238308	NA	-0.017012709	NA	NA	NA	NA	Ankrd52	Ankrd52_Exon	10	128379471	128379520	128379471	128379472	50	+	CGGGCCACCAAGTGTGCTGAGGCTCTGGCACCCCTGTTGAGCAGCCTCAA	Exon (Ankrd52-203/Ankrd52, exon 5 of 15)	10	128377115	128385496	8382	1	Ankrd52-203	2356	Ankrd52-203;Ankrd52-201	Ankrd52;Ankrd52	0;0	TRUE	FALSE	FALSE	FALSE	FALSE	TRUE	FALSE	FALSE	FALSE	Exon	10	12	237615	ENSMUSG00000014498	conserved gene and region
cg11286097	0.141664377	NA	NA	NA	NA	NA	Tenm3	Tenm3_Exon	8	48228923	48228972	48228971	48228972	50	+	GATGGTGAAGTGCAGGTTCTCCAGGTAGAAGGCGTTGTTGAGCACGGCCG	Exon (Tenm3-201/Tenm3, exon 29 of 29)	8	48227682	48674690	447009	2	Tenm3-201	445718	Tenm3-201;Tenm3-206	Tenm3;Tenm3	0;0	TRUE	FALSE	FALSE	FALSE	FALSE	TRUE	FALSE	FALSE	FALSE	Exon	7	39	23965	ENSMUSG00000031561	conserved gene and region	8	48228922	48229133	212	*	212	21
cg11311195	-0.51558885	NA	NA	NA	NA	NA	Taf4	Taf4_Exon	2	179975408	179975457	179975456	179975457	50	-	CTCACCTGGGGGCAGCTGGAAGTTCTGGATGTTGGTCGGGTTCTGAGGCG	Exon (Taf4-201/Taf4, exon 1 of 15)	2	179912152	179976646	64495	2	Taf4-201	1189	Taf4-201;Taf4-204	Taf4;Taf4	0;0	TRUE	FALSE	FALSE	FALSE	FALSE	TRUE	TRUE	FALSE	FALSE	Exon	4	4	228980	ENSMUSG00000039117	conserved gene and region	2	179975444	179977269	1826	*	1826	301
cg11438204	0.290388319	NA	NA	NA	NA	NA	Calu	Calu_Exon	6	29361318	29361367	29361318	29361319	50	-	CGACAAGGACGGGTTTGTCACTGTGGATGAGCTCAAAGACTGGATTAAAT	Exon (Calu-208/Calu, exon 3 of 5)	6	29348069	29374503	26435	1	Calu-207	13249	Calu-207;Calu-208;Calu-206;Calu-201;Calu-202;Calu-209;Calu-204	Calu;Calu;Calu;Calu;Calu;Calu;Calu	0;0;0;0;0;0;0	TRUE	FALSE	FALSE	FALSE	FALSE	TRUE	TRUE	FALSE	FALSE	Exon	5	9	12321	ENSMUSG00000029767	conserved gene and region
cg11439618	NA	NA	NA	NA	0.792297124	NA	Lgi2	Lgi2_Exon	5	52565963	52566012	52566011	52566012	50	-	CCCACGCAGATGATAGACTCCTTGGTACAGCTGCAAGTGGCGGGGCAGCG	Promoter (<=1kb)	5	52533517	52566303	32787	2	Lgi2-202	291	Lgi2-202;Lgi2-201	Lgi2;Lgi2	0;0	TRUE	FALSE	TRUE	FALSE	FALSE	TRUE	FALSE	FALSE	FALSE	Exon	2	2	246316	ENSMUSG00000039252	conserved gene and region	5	52565831	52566434	604	*	604	81
cg11448896	NA	NA	NA	NA	0.192757484	NA	Dmrta2	Dmrta2_Promoter	4	109977966	109978015	109977966	109977967	50	-	CGCCACATTGTTGTCCAATTCTGTCTAATGGAGCCCTAAGGACCAACAAT	Promoter (<=1kb)	4	109978053	109983687	5635	1	Dmrta2-201	-87	Dmrta2-201	Dmrta2	0	FALSE	TRUE	TRUE	FALSE	FALSE	FALSE	FALSE	FALSE	FALSE	Promoter	7	13	242620	ENSMUSG00000047143	conserved gene and region	4	109977517	109977967	451	*	451	38
cg11452666	NA	NA	NA	NA	0.333844102	NA	Zfpm2	Zfpm2_Intron	15	40978768	40978817	40978816	40978817	50	-	GAGTAGCGCTGCAAGGTAGGTGATGTCTAGGTTTTTAATCTTCCACTCCG	Intron (Zfpm2-201/Zfpm2, intron 5 of 7)	15	40655035	41104592	449558	1	Zfpm2-201	323733	Zfpm2-201;Zfpm2-203	Zfpm2;Zfpm2	0;0	TRUE	FALSE	FALSE	FALSE	FALSE	FALSE	TRUE	FALSE	FALSE	Intron	39	41	22762	ENSMUSG00000022306	mapped to different genes
cg11464058	NA	NA	0.149471989	NA	NA	NA	Pex14	Pex14_Intron	4	149061863	149061912	149061863	149061864	50	-	CGGAGCTCACTCTAGTGAGGATATAAACGCGCTGTGGGAATCTACAGATT	Intron (Pex14-201/Pex14, intron 2 of 8)	4	148960535	149099876	139342	2	Pex14-201	37964	Pex14-201;Pex14-202;Pex14-205;Pex14-203;Pex14-204	Pex14;Pex14;Pex14;Pex14;Pex14	0;0;0;0;0	TRUE	FALSE	FALSE	FALSE	FALSE	FALSE	TRUE	FALSE	FALSE	Intron	41	48	56273	ENSMUSG00000028975	conserved gene and region
cg11477279	0.152097398	NA	NA	NA	NA	NA	Dmd	Dmd_Exon	X	83924933	83924982	83924933	83924934	50	+	CGAGAGGAAATAAAGATAAAACAGCAGCTGTTACAGACAAAACATAATGC	Exon (Dmd-203/Dmd, exon 39 of 79)	20	82948903	85206141	2257239	1	Dmd-203	976030	Dmd-203;Dmd-215;Dmd-209	Dmd;Dmd;Dmd	0;0;0	TRUE	FALSE	FALSE	FALSE	FALSE	TRUE	FALSE	FALSE	FALSE	Exon	20	28	13405	ENSMUSG00000045103	conserved gene and region
cg11551173	NA	NA	NA	NA	0.510831837	NA	Ankfn1	Ankfn1_Intron	11	89662516	89662565	89662564	89662565	50	+	ATGGCCATGGCCAATCTCGTAGATTGGTACAAGTCCACATTTCCCAAACG	Intron (Ankfn1-208/Ankfn1, intron 3 of 21)	11	89391238	89841266	450029	2	Ankfn1-208	178701	Ankfn1-208;Ankfn1-202;Ankfn1-205;Ankfn1-204	Ankfn1;Ankfn1;Ankfn1;Ankfn1	0;0;0;0	TRUE	FALSE	FALSE	FALSE	FALSE	FALSE	TRUE	FALSE	FALSE	Intron	8	15	382543	ENSMUSG00000047773	mapped to different genes
cg11565438	NA	NA	NA	NA	-1.767458689	NA	Hmbox1	Hmbox1_Exon	14	64887562	64887611	64887610	64887611	50	-	CTTCAGCTCTTACCTGTTACCTGTGCAACAACTGCTTGGGAAATCCTCCG	Exon (Hmbox1-201/Hmbox1, exon 4 of 11)	14	64811600	64949850	138251	2	Hmbox1-201	62239	Hmbox1-201;Hmbox1-202;Hmbox1-205;Hmbox1-209;Hmbox1-210;Hmbox1-203;Hmbox1-207;Hmbox1-204;Hmbox1-208	Hmbox1;Hmbox1;Hmbox1;Hmbox1;Hmbox1;Hmbox1;Hmbox1;Hmbox1;Hmbox1	0;0;0;0;0;0;0;0;0	TRUE	FALSE	FALSE	FALSE	FALSE	TRUE	TRUE	FALSE	FALSE	Exon	5	8	219150	ENSMUSG00000021972	conserved gene and region
cg11614630	NA	NA	0.105324948	NA	NA	NA	Dll1	Dll1_Promoter	17	15378809	15378858	15378809	15378810	50	+	CGGGGAGACTGTTTAACTTCAGCGTTTCTATAGGAGCCTGTTGTAGTTTA	Promoter (1-2kb)	17	15374794	15376872	2079	2	Dll1-205	-1937	Dll1-201;Dll1-203;Dll1-202;Dll1-205	Dll1;Dll1;Dll1;Dll1	-2833;-4737;-3709;0	FALSE	TRUE	TRUE	FALSE	FALSE	FALSE	FALSE	FALSE	FALSE	Promoter	9	9	13388	ENSMUSG00000014773	conserved gene but different region
cg11636414	NA	NA	NA	NA	-0.00161268	NA	Gm6411	Gm6411_Intron	13	83732212	83732261	83732212	83732213	50	-	CGTCTGTCAGGAGGGGACTATGAGAGGTTTGGGTGCAAATTCATTATCTC	Intron (C130071C03Rik-201/C130071C03Rik-201, intron 1 of 3)	13	83761132	83762335	1204	2	Gm6411-201	30123	NA	NA	NA	TRUE	FALSE	FALSE	FALSE	FALSE	FALSE	TRUE	FALSE	FALSE	Intron	26	36	623241	NA	mapped to different genes
cg11717789	-0.048926914	NA	NA	NA	NA	NA	Psmd11	Psmd11_threeUTR	11	80462606	80462655	80462654	80462655	50	+	TCTAGCCCAGAAGATGTCCAGGCTTTGGTGAGCGGGAAGCTTGCACTTCG	Promoter (<=1kb)	11	80462611	80473248	10638	1	Psmd11-213	0	Psmd11-214;Psmd11-201;Psmd11-204;Psmd11-208;Psmd11-215;Psmd11-209;Psmd11-205;Psmd11-203;Psmd11-213;Psmd11-202	Psmd11;Psmd11;Psmd11;Psmd11;Psmd11;Psmd11;Psmd11;Psmd11;Psmd11;Psmd11	0;0;0;33941;0;0;0;0;0;0	TRUE	FALSE	TRUE	FALSE	TRUE	TRUE	TRUE	FALSE	FALSE	threeUTR	4	4	69077	ENSMUSG00000017428	conserved gene and region
cg11735605	-1.086657936	NA	NA	NA	NA	NA	Ikzf2	Ikzf2_fiveUTR	1	69687142	69687191	69687142	69687143	50	+	CGTGTGTTTGTGCACTGCAGTTGGTGGTGGAAACTAAGGCAGTGGATCTG	Promoter (<=1kb)	1	69538582	69687245	148664	2	Ikzf2-202	54	Ikzf2-201;Ikzf2-207;Ikzf2-202;Ikzf2-204;Ikzf2-208;Ikzf2-209;Ikzf2-206;Ikzf2-203;Ikzf2-205	Ikzf2;Ikzf2;Ikzf2;Ikzf2;Ikzf2;Ikzf2;Ikzf2;Ikzf2;Ikzf2	0;0;0;0;0;0;-1842;-2606;0	TRUE	FALSE	TRUE	TRUE	FALSE	TRUE	FALSE	FALSE	FALSE	fiveUTR	4	14	22779	ENSMUSG00000025997	conserved gene and region
cg11742933	NA	NA	NA	NA	-0.11600325	-0.42091181	Apbb1	Apbb1_threeUTR	7	105565540	105565589	105565588	105565589	50	+	CAGATCTCATGCAGGCTGGTGGCGATGTTCTTGGCAGGTGCCTCACAGCG	3' UTR	7	105558483	105581653	23171	2	Apbb1-217	16064	Apbb1-217;Apbb1-209;Apbb1-215;Apbb1-212;Apbb1-219;Apbb1-201;Apbb1-208;Apbb1-214;Apbb1-213;Apbb1-205;Apbb1-221;Apbb1-218;Apbb1-202;Apbb1-210;Apbb1-207;Apbb1-206;Apbb1-220;Apbb1-204;Apbb1-203;Apbb1-216	Apbb1;Apbb1;Apbb1;Apbb1;Apbb1;Apbb1;Apbb1;Apbb1;Apbb1;Apbb1;Apbb1;Apbb1;Apbb1;Apbb1;Apbb1;Apbb1;Apbb1;Apbb1;Apbb1;Apbb1	0;0;0;0;0;0;0;0;0;0;0;-35;0;0;3374;3676;3682;3684;0;3081	TRUE	FALSE	FALSE	FALSE	TRUE	TRUE	TRUE	FALSE	FALSE	threeUTR	2	8	11785	ENSMUSG00000037032	conserved gene but different region
cg11772199	NA	NA	NA	0.124297979	NA	NA	Gm11819	Gm11819_Intergenic_upstream	4	13298655	13298704	13298655	13298656	50	-	CGTTAGCTATTGTTTTGAAAATGACAGTATGGCCAATAATTTCAATTTCA	Distal Intergenic	4	13444770	13445141	372	1	Gm11819-201	-146115	NA	NA	NA	FALSE	TRUE	FALSE	FALSE	FALSE	FALSE	FALSE	FALSE	TRUE	Intergenic_upstream	19	22	NA	NA	mapped to different genes
cg11887895	NA	NA	NA	NA	-0.161833745	NA	Dlx5	Dlx5_fiveUTR	6	6882085	6882134	6882133	6882134	50	+	TGGCTGAGGCGCAGCACAGCCTTGGTTAAATCCTTAATTGCGCGCTTACG	Promoter (<=1kb)	6	6877805	6882085	4281	2	Dlx5-201	0	Dlx5-202;Dlx5-201;Dlx5-203	Dlx5;Dlx5;Dlx5	0;0;0	TRUE	FALSE	TRUE	TRUE	FALSE	TRUE	FALSE	FALSE	FALSE	fiveUTR	2	6	13395	ENSMUSG00000029755	conserved gene and region	6	6881983	6882197	215	*	215	16
cg11926564	NA	NA	NA	NA	-0.152619034	NA	Nlgn1	Nlgn1_Exon	3	25433846	25433895	25433846	25433847	50	-	CGAAGAACCACCTCATGTGGATGAATGGACTCACATTCATGATCCAAATC	Exon (Nlgn1-205/Nlgn1, exon 8 of 8)	3	25426215	26332460	906246	2	Nlgn1-205	898565	Nlgn1-205;Nlgn1-201;Nlgn1-202;Nlgn1-203	Nlgn1;Nlgn1;Nlgn1;Nlgn1	0;0;0;0	TRUE	FALSE	FALSE	FALSE	FALSE	TRUE	FALSE	FALSE	FALSE	Exon	5	7	192167	ENSMUSG00000063887	conserved gene and region
cg11948733	NA	NA	-0.093467267	NA	NA	NA	Ypel3	Ypel3_fiveUTR	7	126777833	126777882	126777833	126777834	50	+	CGCCATGGTGCGGATTTCAAAGCCCAAGACGTTTCAGGCCTACTTGGATG	Promoter (<=1kb)	7	126776955	126780514	3560	1	Ypel3-201	878	Gdpd3-201;Gdpd3-203;Tbx6-202;Tbx6-201;Ypel3-201;Ypel3-210;Ypel3-204;Ypel3-209;Ypel3-211;Ypel3-203;Ypel3-207;Ypel3-205;Ypel3-202;Ypel3-208;Ypel3-206	Gdpd3;Gdpd3;Tbx6;Tbx6;Ypel3;Ypel3;Ypel3;Ypel3;Ypel3;Ypel3;Ypel3;Ypel3;Ypel3;Ypel3;Ypel3	11499;9313;-3601;-3601;0;0;0;0;0;0;0;0;0;0;0	TRUE	FALSE	TRUE	TRUE	FALSE	TRUE	TRUE	FALSE	FALSE	fiveUTR	2	4	66090	ENSMUSG00000042675	conserved gene and region	7	126777793	126777939	147	*	147	11
cg11967831	NA	NA	-0.133347441	NA	NA	NA	Phox2b	Phox2b_Promoter	5	67100396	67100445	67100396	67100397	50	+	CGTGTGGTGTAAACAAACCCTGGATATTTTATATGAATTAAATGTGTAGA	Promoter (1-2kb)	5	67094399	67099301	4903	2	Phox2b-201	-1095	Phox2b-201;Phox2b-202	Phox2b;Phox2b	0;0	FALSE	TRUE	TRUE	FALSE	FALSE	FALSE	FALSE	FALSE	FALSE	Promoter	13	28	18935	ENSMUSG00000012520	conserved gene and region
cg12026817	-0.014283163	NA	NA	NA	NA	NA	Dpyd	Dpyd_Exon	3	118433906	118433955	118433954	118433955	50	+	GCTTAAGAATACGCGTAGTCGAGGAGAGTACCAGCGGCAGGGGGGCAGCG	Exon (Gm26871-202/Gm26871-202, exon 3 of 3)	3	118562129	119432924	870796	1	Dpyd-201	-128174	NA	NA	NA	TRUE	FALSE	FALSE	FALSE	FALSE	TRUE	FALSE	FALSE	FALSE	Exon	8	29	99586	ENSMUSG00000033308	mapped to different genes	3	118433691	118434190	500	*	500	37
cg12030043	NA	NA	NA	NA	-0.129551299	NA	Sox14	Sox14_Exon	9	99874976	99875025	99874976	99874977	50	+	CGTGGGCTGACGAATAAGGGTCTATGCCAGTCTTGGTCATGCCTGGGAAG	Exon (Sox14-201/Sox14, exon 1 of 1)	9	99874106	99876170	2065	2	Sox14-201	1145	Sox14-201;Sox14-202	Sox14;Sox14	0;0	TRUE	FALSE	FALSE	FALSE	FALSE	TRUE	FALSE	FALSE	FALSE	Exon	6	18	20669	ENSMUSG00000053747	conserved gene and region
cg12036377	NA	NA	NA	0.051557496	NA	NA	C1ql3	C1ql3_fiveUTR	2	13011697	13011746	13011697	13011698	50	+	CGGAGCAATTTATAGGCACCCAAGGCACAGAGGAAGGGGAGCCGCTTTGG	Promoter (<=1kb)	2	13003457	13011806	8350	2	C1ql3-201	60	C1ql3-201	C1ql3	0	TRUE	FALSE	TRUE	TRUE	FALSE	TRUE	FALSE	FALSE	FALSE	fiveUTR	4	9	227580	ENSMUSG00000049630	conserved gene but different region	2	13011690	13011698	9	*	9	4
cg12045717	NA	NA	NA	NA	-0.107690041	NA	Gsx2	Gsx2_Promoter	5	75071761	75071810	75071809	75071810	50	-	GATCTTTGTTCTTTTCCACTATTATTGAGGACTTTCTTGAAGACTAAGCG	Promoter (3-4kb)	5	75075601	75077893	2293	1	Gsx2-201	-3840	Gsx2-201;Gsx2-202	Gsx2;Gsx2	-3791;-3792	FALSE	TRUE	TRUE	FALSE	FALSE	FALSE	FALSE	FALSE	FALSE	Promoter	5	10	14843	ENSMUSG00000035946	mapped to different genes
cg12052770	NA	NA	NA	-0.344749803	NA	NA	Wdtc1	Wdtc1_Intron	4	133299890	133299939	133299938	133299939	50	-	GGCACACCAGCTGGCCTGTCTGTCTGGGCAGAGCCGACGGATGCCAGACG	Intron (Wdtc1-201/Wdtc1, intron 12 of 15)	4	133292459	133339324	46866	2	Wdtc1-201	39385	Wdtc1-201;Wdtc1-202	Wdtc1;Wdtc1	0;0	TRUE	FALSE	FALSE	FALSE	FALSE	FALSE	TRUE	FALSE	FALSE	Intron	2	3	230796	ENSMUSG00000037622	conserved gene and region
cg12056279	NA	NA	NA	NA	-0.331683584	NA	Hoxa11	Hoxa11_Exon	6	52245461	52245510	52245509	52245510	50	+	CCGCGGAGTAGCAGTGGGCCAGATTGCCGCGGGGGTGCCATTTAGTGGCG	Promoter (<=1kb)	6	52242106	52245810	3705	2	Hoxa11-201	300	Hoxa10-201;Hoxa10-204;Hoxa11-201;Hoxa11-202	Hoxa10;Hoxa10;Hoxa11;Hoxa11	0;0;0;0	TRUE	FALSE	TRUE	FALSE	FALSE	TRUE	FALSE	FALSE	FALSE	Exon	15	18	15396	ENSMUSG00000038210	mapped to different genes	6	52244948	52245549	602	*	602	70
cg12073704	NA	-0.005594292	NA	NA	NA	NA	Dglucy	Dglucy_Exon	12	100878553	100878602	100878601	100878602	50	-	TAGGGCAGGAAGCAGGCCAGGAAGATGACCACGGTGCTGAGCACCAGCCG	Exon (Gpr68-203/Gpr68, exon 3 of 3)	12	100779086	100896981	117896	1	Dglucy-203	99467	Dglucy-203;Dglucy-205;Gpr68-203;Gpr68-201;Gpr68-202;Gpr68-206	Dglucy;Dglucy;Gpr68;Gpr68;Gpr68;Gpr68	0;11364;0;0;0;20896	TRUE	FALSE	FALSE	FALSE	FALSE	TRUE	TRUE	FALSE	FALSE	Exon	3	3	217830	ENSMUSG00000021185	mapped to different genes	12	100878532	100878656	125	*	125	9
cg12076803	NA	0.044899607	NA	NA	NA	NA	Plxnc1	Plxnc1_threeUTR	10	94792943	94792992	94792991	94792992	50	-	AGGCTGTTTGCAACAACCACTTCAACTCTATTTACAGAAGGGTTCCCACG	3' UTR	10	94790866	94944835	153970	2	Plxnc1-201	151843	Cep83-201;Cep83-202;Plxnc1-201	Cep83;Cep83;Plxnc1	104289;52859;0	TRUE	FALSE	FALSE	FALSE	TRUE	TRUE	FALSE	FALSE	FALSE	threeUTR	2	5	54712	ENSMUSG00000074785	conserved gene and region
cg12135913	-0.134475133	NA	NA	NA	NA	NA	Pcdh17	Pcdh17_fiveUTR	14	84444773	84444822	84444821	84444822	50	-	GCACTTGACAGCCCAGCCCTGTGAATGCAGAGACTGTTTCCCTTCTAGCG	5' UTR	14	84443563	84539002	95440	1	Pcdh17-201	1210	Pcdh17-201;Pcdh17-202	Pcdh17;Pcdh17	0;0	TRUE	FALSE	FALSE	TRUE	FALSE	TRUE	FALSE	FALSE	FALSE	fiveUTR	1	13	219228	ENSMUSG00000035566	conserved gene but different region
cg12185545	NA	-0.026204694	NA	NA	NA	NA	Uncx	Uncx_Intergenic_downstream	5	139599906	139599955	139599954	139599955	50	-	GTTCCACTCCAGTGCCCTCCCCAATAAAACTTTTCATATCCTTATAAACG	Distal Intergenic	5	139543898	139545268	1371	1	Uncx-202	56057	NA	NA	NA	FALSE	TRUE	FALSE	FALSE	FALSE	FALSE	FALSE	FALSE	TRUE	Intergenic_downstream	59	88	22255	ENSMUSG00000029546	conserved gene and region
cg12220493	NA	NA	0.380637033	NA	1.386639531	NA	Nkx2-1	Nkx2-1_fiveUTR	12	56536690	56536739	56536690	56536691	50	-	CGCTGGATATTAGTAGATGAGGATCATTCTGCTTCAATTGGGCGCCTCTC	Promoter (<=1kb)	12	56531958	56536908	4951	2	Nkx2-1-201	169	Nkx2-1-202;Nkx2-1-201	Nkx2-1;Nkx2-1	0;0	TRUE	FALSE	TRUE	TRUE	FALSE	TRUE	TRUE	FALSE	FALSE	fiveUTR	6	29	21869	ENSMUSG00000001496	mapped to different genes	12	56536346	56536691	346	*	346	28
cg12247042	-0.127478039	NA	NA	NA	NA	NA	Dnajb5	Dnajb5_Exon	4	42956669	42956718	42956669	42956670	50	+	CGGCCCTTCAGTGGCTTTGACCCAGATGACATGGATGTGGATGAAGATGA	Exon (Dnajb5-201/Dnajb5, exon 4 of 5)	4	42949814	42959425	9612	1	Dnajb5-201	6855	Dnajb5-201;Dnajb5-203;Dnajb5-206;Dnajb5-202;Dnajb5-207;Dnajb5-204	Dnajb5;Dnajb5;Dnajb5;Dnajb5;Dnajb5;Dnajb5	0;0;0;0;0;0	TRUE	FALSE	FALSE	FALSE	FALSE	TRUE	FALSE	FALSE	FALSE	Exon	2	8	56323	ENSMUSG00000036052	conserved gene and region
cg12264936	NA	-0.082695412	NA	NA	NA	NA	Kazald1	Kazald1_Intron	19	45104826	45104875	45104874	45104875	50	-	TGATTCAGGCATCAGATGGGCCGACAGCCAGAGATTAATTCAACTGATCG	Intron (Gm35867-203/Gm35867-203, intron 2 of 4)	19	45076139	45079289	3151	1	Kazald1-201	28736	NA	NA	NA	TRUE	FALSE	FALSE	FALSE	FALSE	FALSE	TRUE	FALSE	FALSE	Intron	5	8	107250	ENSMUSG00000025213	conserved gene but different region
cg12277614	2.37E-05	NA	1.14689173	NA	NA	NA	Psmd14	Psmd14_Exon	2	61761052	61761101	61761052	61761053	50	-	CGTCAGAGTGATTGATGTGTTTGCTATGCCACAGTCAGGAACAGTGAGTA	Exon (Psmd14-201/Psmd14, exon 5 of 12)	2	61711694	61800376	88683	1	Psmd14-201	49358	Psmd14-201;Psmd14-206;Psmd14-207;Psmd14-208	Psmd14;Psmd14;Psmd14;Psmd14	0;0;0;0	TRUE	FALSE	FALSE	FALSE	FALSE	TRUE	TRUE	FALSE	FALSE	Exon	2	9	59029	ENSMUSG00000026914	conserved gene and region
cg12285520	-0.248048892	NA	NA	NA	NA	NA	Mecom	Mecom_Intron	3	30106626	30106675	30106626	30106627	50	+	CGGGCGATCCTCCGACTGCTCGGCGCCAACCACAACATGCTACCCACCGT	Intron (Mecom-212/Mecom, intron 1 of 15)	3	29951299	30509733	558435	2	Mecom-212	403058	Mecom-212;Mecom-203;Mecom-210;Mecom-213;Mecom-207;Mecom-208;Mecom-211	Mecom;Mecom;Mecom;Mecom;Mecom;Mecom;Mecom	0;0;0;0;0;0;0	TRUE	FALSE	FALSE	FALSE	FALSE	FALSE	TRUE	FALSE	FALSE	Intron	57	80	14013	ENSMUSG00000027684	conserved gene and region	3	30106598	30106734	137	*	137	14
cg12307242	0.003127744	NA	NA	NA	NA	0.003438067	Cadps2	Cadps2_Intron	6	23272710	23272759	23272758	23272759	50	-	TCACACTTATTGTGCATGACTGTAGACTGGTAAATCATATTAGCAGCCCG	Intron (Cadps2-213/Cadps2, intron 28 of 29)	6	23262773	23839137	576365	2	Cadps2-213	566378	Cadps2-213;Cadps2-205;Cadps2-212;Cadps2-201;Cadps2-209;Cadps2-206;Cadps2-211;Cadps2-207;Cadps2-202;Cadps2-210	Cadps2;Cadps2;Cadps2;Cadps2;Cadps2;Cadps2;Cadps2;Cadps2;Cadps2;Cadps2	0;0;0;0;0;0;0;0;0;0	TRUE	FALSE	FALSE	FALSE	FALSE	FALSE	TRUE	FALSE	FALSE	Intron	13	15	320405	ENSMUSG00000017978	conserved gene and region
cg12309991	NA	0.166622107	NA	NA	NA	NA	Zeb2	Zeb2_fiveUTR	2	45113194	45113243	45113194	45113195	50	+	CGCCAAGTTTCTCTCTGGGAAAGGATCTGGGATAGATTATACCTTGAAGT	Promoter (<=1kb)	2	45104038	45113216	9179	2	Zeb2-205	0	Zeb2-212;Zeb2-213;Zeb2-201;Zeb2-202;Zeb2-215;Zeb2-214;Zeb2-203;Zeb2-221;Zeb2-220;Zeb2-216;Zeb2-222;Zeb2-208;Zeb2-228;Zeb2-226;Zeb2-209;Zeb2-224;Zeb2-207;Zeb2-219;Zeb2-211;Zeb2-210;Zeb2-205;Zeb2-223;Zeb2-217;Zeb2-225;Zeb2-204;Zeb2-206;Zeb2-230	Zeb2;Zeb2;Zeb2;Zeb2;Zeb2;Zeb2;Zeb2;Zeb2;Zeb2;Zeb2;Zeb2;Zeb2;Zeb2;Zeb2;Zeb2;Zeb2;Zeb2;Zeb2;Zeb2;Zeb2;Zeb2;Zeb2;Zeb2;Zeb2;Zeb2;Zeb2;Zeb2	0;0;0;0;0;0;0;0;0;0;0;0;0;0;0;0;0;0;0;0;0;0;-3118;0;0;0;0	TRUE	FALSE	TRUE	TRUE	FALSE	TRUE	TRUE	FALSE	FALSE	fiveUTR	15	158	24136	ENSMUSG00000026872	mapped to different genes
cg12321152	NA	NA	NA	NA	-0.436526974	NA	Cnot9	Cnot9_Exon	1	74528774	74528823	74528774	74528775	50	+	CGCTGGCTTGCACAACTGGTGAAGAACCTGCAAGAGGGCCAGGTCACCGA	Exon (Cnot9-201/Cnot9, exon 8 of 8)	1	74506058	74530842	24785	1	Cnot9-201	22716	Cnot9-201;Cnot9-202;Cnot9-203;Usp37-205	Cnot9;Cnot9;Cnot9;Usp37	0;22714;5247;0	TRUE	FALSE	FALSE	FALSE	FALSE	TRUE	TRUE	FALSE	FALSE	Exon	4	4	58184	ENSMUSG00000026174	conserved gene but different region
cg12348962	NA	NA	NA	0.107224862	NA	NA	Epha5	Epha5_Exon	5	84233852	84233901	84233900	84233901	50	+	ATCCATTCCAGAAAGACACTAGTTTCATTAACATTTGAGATGGCATTCCG	Exon (Epha5-205/Epha5, exon 5 of 18)	5	84054761	84416921	362161	2	Epha5-201	183020	Epha5-201;Epha5-205;Epha5-206;Epha5-202;Epha5-203;Epha5-204;Epha5-209;Epha5-208;Epha5-210	Epha5;Epha5;Epha5;Epha5;Epha5;Epha5;Epha5;Epha5;Epha5	0;0;0;0;0;0;0;0;0	TRUE	FALSE	FALSE	FALSE	FALSE	TRUE	TRUE	FALSE	FALSE	Exon	8	9	13839	ENSMUSG00000029245	conserved gene and region
cg12373771	NA	NA	NA	NA	0.169462092	NA	Tmem121b	Tmem121b_Exon	6	120493082	120493131	120493130	120493131	50	-	AGCACCAGTACAGGTCGGTGACGGCGATGAGGTACAGGTCCAGCAGGCCG	Promoter (<=1kb)	6	120488939	120493807	4869	2	Tmem121b-201	676	Tmem121b-201	Tmem121b	0	TRUE	FALSE	TRUE	FALSE	FALSE	TRUE	FALSE	FALSE	FALSE	Exon	1	1	94047	ENSMUSG00000094626	conserved gene and region	6	120493130	120494085	956	*	956	120
cg12386526	NA	NA	NA	-0.000659139	NA	NA	Setd5	Setd5_Exon	6	113110654	113110703	113110654	113110655	50	-	CGAATTCTCTGCACTAGGTGAGAATTGCTGACAACAAGGAATGAGAGATT	Exon (Setd5-204/Setd5, exon 1 of 6)	6	113077365	113153435	76071	1	Setd5-201	33289	Setd5-209;Setd5-201;Setd5-206;Setd5-205;Setd5-203;Setd5-212;Setd5-202;Setd5-204;Setd5-210;Setd5-214;Setd5-207	Setd5;Setd5;Setd5;Setd5;Setd5;Setd5;Setd5;Setd5;Setd5;Setd5;Setd5	0;0;0;0;0;0;0;0;0;0;0	TRUE	FALSE	FALSE	FALSE	FALSE	TRUE	TRUE	FALSE	FALSE	Exon	14	19	72895	ENSMUSG00000034269	conserved gene but different region
cg12407846	NA	NA	NA	-0.037265781	NA	NA	Setbp1	Setbp1_Intron	18	78792442	78792491	78792442	78792443	50	+	CGATAGTGATGAACTCCCAGCTAATAAACACAGAGTGCTTATTTCGGCAG	Intron (Setbp1-201/Setbp1, intron 4 of 5)	18	78750380	79109391	359012	2	Setbp1-201	316900	Setbp1-201	Setbp1	0	TRUE	FALSE	FALSE	FALSE	FALSE	FALSE	TRUE	FALSE	FALSE	Intron	3	9	240427	ENSMUSG00000024548	conserved gene and region
cg12476049	0.443229245	NA	NA	NA	NA	NA	D430041D05Rik	D430041D05Rik_Exon	2	104208172	104208221	104208172	104208173	50	+	CGTTGCTGATGACAGAGCCATTCTCACTGGGCGACCTGCTGGAGGTAACC	Exon (D430041D05Rik-201/D430041D05Rik, exon 13 of 21)	2	104143073	104410334	267262	2	D430041D05Rik-201	202113	D430041D05Rik-201;D430041D05Rik-202;D430041D05Rik-203;D430041D05Rik-207;D430041D05Rik-206;D430041D05Rik-204	D430041D05Rik;D430041D05Rik;D430041D05Rik;D430041D05Rik;D430041D05Rik;D430041D05Rik	0;0;0;0;0;0	TRUE	FALSE	FALSE	FALSE	FALSE	TRUE	TRUE	FALSE	FALSE	Exon	3	3	241589	ENSMUSG00000068373	conserved gene but different region
cg12564910	NA	NA	0.042008334	NA	NA	NA	Socs3	Socs3_Exon	11	117968122	117968171	117968122	117968123	50	+	CGTTCACCACCAGCTGGTACTCGCTCTTGGAGCTGAAGGTCTTGAGGCGC	Exon (Socs3-201/Socs3, exon 2 of 2)	11	117966079	117969186	3108	2	Socs3-201	1015	Socs3-201;Socs3-202;Socs3-203	Socs3;Socs3;Socs3	0;1876;1280	TRUE	FALSE	FALSE	FALSE	FALSE	TRUE	FALSE	FALSE	FALSE	Exon	6	9	12702	ENSMUSG00000053113	conserved gene and region	11	117967759	117969258	1500	*	1500	136
cg12613764	NA	0.0108867	NA	NA	NA	NA	Gm11819	Gm11819_Intergenic_upstream	4	13408477	13408526	13408477	13408478	50	-	CGCAGCATTTGACAGATTGGGCAGAACTGCCACGAAAGAGTCTGACACAG	Distal Intergenic	4	13444770	13445141	372	1	Gm11819-201	-36293	NA	NA	NA	FALSE	TRUE	FALSE	FALSE	FALSE	FALSE	FALSE	FALSE	TRUE	Intergenic_upstream	19	22	NA	NA	mapped to different genes
cg12657315	0.010093977	NA	NA	NA	NA	NA	Trio	Trio_threeUTR	15	27744050	27744099	27744050	27744051	50	-	CGGCTCGGAACACCAGAAACATGTTCTGCTGGTTGCTGGCCAGAATTTGA	3' UTR	15	27730651	28025848	295198	2	Trio-201	281749	Trio-212;Trio-201;Trio-208;Trio-206;Trio-214;Trio-211;Trio-205	Trio;Trio;Trio;Trio;Trio;Trio;Trio	-1727;0;0;0;0;0;0	TRUE	FALSE	FALSE	FALSE	TRUE	TRUE	FALSE	FALSE	FALSE	threeUTR	8	11	223435	ENSMUSG00000022263	conserved gene and region	15	27743899	27744056	158	*	158	12
cg12704157	NA	NA	NA	NA	-0.002349888	NA	Pax2	Pax2_Intergenic_upstream	19	44670437	44670486	44670485	44670486	50	+	CCTCCGGTTCCCATGTTGTCGAGGCATGCTGGGAGTACAAGTTCCGAGCG	Distal Intergenic	19	44756045	44837851	81807	1	Pax2-203	-85559	NA	NA	NA	FALSE	TRUE	FALSE	FALSE	FALSE	FALSE	FALSE	FALSE	TRUE	Intergenic_upstream	101	166	18504	ENSMUSG00000004231	conserved gene and region	19	44670410	44670516	107	*	107	13
cg12762301	NA	NA	NA	-0.144236197	NA	NA	Crebrf	Crebrf_threeUTR	17	26772297	26772346	26772297	26772298	50	-	CGATTGTTTTATTTTTTGTACCAAAGACAAATGCAACTGATATGGCAAAC	3' UTR	17	26715650	26776635	60986	1	Crebrf-201	56647	Crebrf-201	Crebrf	0	TRUE	FALSE	FALSE	FALSE	TRUE	TRUE	FALSE	FALSE	FALSE	threeUTR	2	5	77128	ENSMUSG00000048249	conserved gene and region
cg12790413	-0.262095981	NA	NA	NA	NA	NA	Rprd1b	Rprd1b_Intron	2	158060022	158060071	158060070	158060071	50	-	CTGATCTGTCAGACATTGATTATCATGAGCAGCTGTTGTTGGGTAGAACG	Intron (Rprd1b-202/Rprd1b, intron 6 of 6)	2	158028497	158078207	49711	1	Rprd1b-202	31525	Rprd1b-202;Rprd1b-208;Rprd1b-203;Rprd1b-201;Rprd1b-207;Rprd1b-205;Rprd1b-206	Rprd1b;Rprd1b;Rprd1b;Rprd1b;Rprd1b;Rprd1b;Rprd1b	0;0;0;0;0;0;0	TRUE	FALSE	FALSE	FALSE	FALSE	FALSE	TRUE	FALSE	FALSE	Intron	1	1	70470	ENSMUSG00000027651	conserved gene and region
cg12818000	NA	NA	NA	NA	0.596951053	NA	Hand2	Hand2_Exon	8	57353962	57354011	57353962	57353963	50	-	CGGAATGTCCTGTGTGCCACATGGAGCTTGGGGAAAGGAAATGATTAAAG	Exon (5033428I22Rik-203/5033428I22Rik-203, exon 3 of 3)	8	57320983	57324633	3651	1	Hand2-201	33028	NA	NA	NA	TRUE	FALSE	FALSE	FALSE	FALSE	TRUE	FALSE	FALSE	FALSE	Exon	6	9	15111	ENSMUSG00000038193	mapped to different genes
cg12837065	-0.002562756	NA	NA	NA	NA	NA	Zbtb20	Zbtb20_Intron	16	43502732	43502781	43502732	43502733	50	-	CGGCATCTGACTGTACCTGTCTTGTTCTCTGCAGCATCTGTCTGCTACAC	Intron (Zbtb20-211/Zbtb20, intron 4 of 4)	16	42907542	43569781	662240	1	Zbtb20-211	595190	Zbtb20-211;Zbtb20-217;Zbtb20-204;Zbtb20-215;Zbtb20-201;Zbtb20-203;Zbtb20-214;Zbtb20-213;Zbtb20-219;Zbtb20-216;Zbtb20-208;Zbtb20-207;Zbtb20-220;Zbtb20-206	Zbtb20;Zbtb20;Zbtb20;Zbtb20;Zbtb20;Zbtb20;Zbtb20;Zbtb20;Zbtb20;Zbtb20;Zbtb20;Zbtb20;Zbtb20;Zbtb20	0;0;0;0;0;0;0;0;0;0;0;0;0;0	TRUE	FALSE	FALSE	FALSE	FALSE	FALSE	TRUE	FALSE	FALSE	Intron	64	98	56490	ENSMUSG00000022708	mapped to different genes
cg12841266	0.56665805	NA	2.197476407	0.665175384	0.308755737	0.002083376	Lhfpl4	Lhfpl4_Exon	6	113193905	113193954	113193953	113193954	50	-	GGATCAGCACCATGGAGAGCAGCACGAAGAAGGCGGCCGCCTTGAAGGCG	Promoter (<=1kb)	6	113175395	113193943	18549	2	Lhfpl4-202	0	Lhfpl4-201;Lhfpl4-202	Lhfpl4;Lhfpl4	0;0	TRUE	FALSE	TRUE	FALSE	FALSE	TRUE	FALSE	FALSE	FALSE	Exon	7	7	269788	ENSMUSG00000042873	conserved gene and region	6	113193884	113194365	482	*	482	42
cg12879445	NA	1.148193933	NA	NA	NA	NA	Unc79	Unc79_fiveUTR	12	102949540	102949589	102949588	102949589	50	-	AACTGGACAGCACCATGTCCACCAAAGCGGAGCAGTGTAAGTAGCAGCCG	Promoter (<=1kb)	12	102949554	103183613	234060	1	Unc79-208	0	Unc79-202;Unc79-208	Unc79;Unc79	0;0	TRUE	FALSE	TRUE	TRUE	FALSE	TRUE	TRUE	FALSE	FALSE	fiveUTR	12	24	217843	ENSMUSG00000021198	conserved gene and region	12	102949567	102949769	203	*	203	20
cg12899502	NA	NA	NA	NA	-0.415799037	NA	Pax6	Pax6_Intron	2	105690034	105690083	105690082	105690083	50	-	TAACACAATGTGGCCCGCTGCACGCCTCAAGAGAATCCTTTTGTTGTCCG	Intron (Pax6-206/Pax6, intron 7 of 12)	2	105668900	105697364	28465	1	Pax6-206	21134	Pax6-206;Pax6-207;Pax6-210;Pax6-208;Pax6-202;Pax6-205;Pax6-225;Pax6-204;Pax6-201;Pax6-203;Pax6-224;Pax6-219;Pax6-213;Pax6-211;Pax6-222;Pax6-212;Pax6-215;Pax6-223;Pax6-216;Pax6-218	Pax6;Pax6;Pax6;Pax6;Pax6;Pax6;Pax6;Pax6;Pax6;Pax6;Pax6;Pax6;Pax6;Pax6;Pax6;Pax6;Pax6;Pax6;Pax6;Pax6	0;0;0;0;0;0;0;0;0;0;0;0;0;0;0;0;0;0;0;-2400	TRUE	FALSE	FALSE	FALSE	FALSE	FALSE	TRUE	FALSE	FALSE	Intron	22	78	18508	ENSMUSG00000027168	conserved gene and region
cg12923877	0.349276988	NA	NA	NA	NA	NA	Srsf11	Srsf11_Exon	3	158024665	158024714	158024713	158024714	50	-	CTACAATTTAAAAATAGCAATGAGGCCCCTCACCAGTTAATTTTCATGCG	Exon (Srsf11-203/Srsf11, exon 4 of 5)	3	158010473	158036639	26167	2	Srsf11-204	11925	Srsf11-204;Srsf11-213;Srsf11-202;Srsf11-207;Srsf11-201;Srsf11-217;Srsf11-218;Srsf11-206;Srsf11-209;Srsf11-210;Srsf11-212;Srsf11-203;Srsf11-208;Srsf11-215	Srsf11;Srsf11;Srsf11;Srsf11;Srsf11;Srsf11;Srsf11;Srsf11;Srsf11;Srsf11;Srsf11;Srsf11;Srsf11;Srsf11	0;0;0;-1525;0;-2661;0;0;0;0;0;0;0;0	TRUE	FALSE	FALSE	FALSE	FALSE	TRUE	TRUE	FALSE	FALSE	Exon	2	8	69207	ENSMUSG00000055436	conserved gene and region
cg12931701	NA	NA	NA	NA	0.131884237	0.51527845	Crim1	Crim1_Exon	17	78279975	78280024	78280023	78280024	50	-	GAGAAGCCAGATTGCTCCAAGGCCCGCTGTGAAGTCCAGTTCTCTCCACG	Exon (Crim1-201/Crim1, exon 3 of 17)	17	78200248	78376592	176345	1	Crim1-201	79727	Crim1-201;Crim1-204;Crim1-205;Crim1-206;Crim1-202	Crim1;Crim1;Crim1;Crim1;Crim1	0;0;0;0;0	TRUE	FALSE	FALSE	FALSE	FALSE	TRUE	TRUE	FALSE	FALSE	Exon	5	5	50766	ENSMUSG00000024074	conserved gene and region	17	78279999	78280123	125	*	125	10
cg12959926	0.06565062	NA	NA	NA	NA	NA	Tmem63b	Tmem63b_Exon	17	45662861	45662910	45662909	45662910	50	-	ACCGAAGGGCACGATGATGGGGCAGGTGATACTGTAGGTCATGACCACCG	Exon (Tmem63b-201/Tmem63b, exon 20 of 24)	17	45660171	45686259	26089	2	Tmem63b-201	23349	Capn11-201;Capn11-202;Tmem63b-201;Tmem63b-208;Tmem63b-203;Tmem63b-207	Capn11;Capn11;Tmem63b;Tmem63b;Tmem63b;Tmem63b	-3536;-3564;0;0;3544;23063	TRUE	FALSE	FALSE	FALSE	FALSE	TRUE	TRUE	FALSE	FALSE	Exon	12	12	224807	ENSMUSG00000036026	conserved gene and region	17	45662805	45662957	153	*	153	13
cg12981876	NA	-0.068781962	NA	NA	NA	NA	Epo	Epo_Exon	5	137525234	137525283	137525234	137525235	50	+	CGTTCCTGCCTGGGGGACACGCTGGAAGCCAAAGAATTTGCCAAACAATT	Exon (Gigyf1-201/Gigyf1, exon 22 of 24)	5	137483020	137533242	50223	2	Epo-202	7959	Epo-202;Gigyf1-202;Gigyf1-201;Gnb2-201;Gnb2-213;Gnb2-209;Gnb2-203;Gnb2-204;Gnb2-202;Gnb2-212;Gnb2-214;Gnb2-215;Gnb2-208;Gnb2-205;Gnb2-210;Gnb2-211;Gnb2-206;Gnb2-207	Epo;Gigyf1;Gigyf1;Gnb2;Gnb2;Gnb2;Gnb2;Gnb2;Gnb2;Gnb2;Gnb2;Gnb2;Gnb2;Gnb2;Gnb2;Gnb2;Gnb2;Gnb2	0;6686;0;0;0;0;0;0;0;0;0;0;0;0;0;0;0;0	TRUE	FALSE	FALSE	FALSE	FALSE	TRUE	TRUE	FALSE	FALSE	Exon	8	9	13856	ENSMUSG00000029711	mapped to different genes
cg12997720	NA	NA	NA	NA	-1.51306628	NA	Hoxa11	Hoxa11_Exon	6	52245967	52246016	52246015	52246016	50	+	GGCTTCCTTTCTTTGTAGCCACCTCAGGGGAAGCAACAGATCGTCACTCG	Promoter (<=1kb)	6	52242106	52245810	3705	2	Hoxa11-201	-157	Hoxa11-201;Hoxa11-202	Hoxa11;Hoxa11	0;0	TRUE	FALSE	TRUE	FALSE	FALSE	TRUE	TRUE	FALSE	FALSE	Exon	15	18	15396	ENSMUSG00000038210	mapped to different genes	6	52246008	52246200	193	*	193	16
cg13000461	NA	0.445207723	NA	NA	NA	NA	Srgap2	Srgap2_Exon	1	131296331	131296380	131296379	131296380	50	-	TGCAAGATAAATATCGGCTACATGACCCCCACTGGGACAGCTGGCCCCCG	Promoter (<=1kb)	1	131295756	131296380	625	2	Srgap2-208	0	Srgap2-201;Srgap2-205;Srgap2-212;Srgap2-204;Srgap2-210;Srgap2-209;Srgap2-208;Srgap2-203	Srgap2;Srgap2;Srgap2;Srgap2;Srgap2;Srgap2;Srgap2;Srgap2	0;0;0;0;0;0;0;67684	TRUE	FALSE	TRUE	FALSE	FALSE	TRUE	FALSE	FALSE	FALSE	Exon	3	3	14270	ENSMUSG00000026425	conserved gene and region
cg13007617	NA	NA	NA	0.041594133	NA	NA	Gm45623	Gm45623_Promoter	13	56757203	56757252	56757203	56757204	50	+	CGGGCAGGAAATTAAACAAGGCTGGTACTGAGTAAATGCAGAGATGAAGT	Promoter (3-4kb)	13	56752371	56753827	1457	2	Gm45623-201	-3376	Gm45623-201	Gm45623	-3376	FALSE	TRUE	TRUE	FALSE	FALSE	FALSE	FALSE	FALSE	FALSE	Promoter	1	1	NA	NA	mapped to different genes
cg13024380	NA	NA	0.005857431	NA	NA	NA	Msl2	Msl2_Exon	9	101101818	101101867	101101866	101101867	50	-	TGTGGGCGTGCTACTCAAAATCCAAGTGTTCTTACATGCCGAGGCCAACG	Exon (Msl2-201/Msl2, exon 2 of 2)	9	101074762	101104800	30039	1	Msl2-201	27056	Msl2-202;Msl2-201;Ppp2r3a-202;Ppp2r3a-201	Msl2;Msl2;Ppp2r3a;Ppp2r3a	0;0;0;0	TRUE	FALSE	FALSE	FALSE	FALSE	TRUE	FALSE	TRUE	FALSE	Exon	12	19	77853	ENSMUSG00000066415	conserved gene and region
cg13028279	0.080298556	NA	NA	NA	NA	NA	Smug1	Smug1_Promoter	15	103169185	103169234	103169185	103169186	50	+	CGCTGCCCTCCCCATGAACCTGCCTTTAATACTGAGGAAGTTATGAAACC	Promoter (2-3kb)	15	103153290	103167092	13803	2	Smug1-202	-2093	Smug1-202;Smug1-205	Smug1;Smug1	-2093;-3669	FALSE	TRUE	TRUE	FALSE	FALSE	FALSE	FALSE	FALSE	FALSE	Promoter	2	12	71726	ENSMUSG00000036061	conserved gene and region	15	103168915	103169374	460	*	460	54
cg13057591	NA	NA	NA	NA	-0.436247374	NA	Bend5	Bend5_fiveUTR	4	111415168	111415217	111415216	111415217	50	-	GCCCACCATGTACGCCTTTGTGCGGTTCCTGGAGGACAACGTCTGCTACG	Promoter (<=1kb)	4	111415207	111420538	5332	1	Bend5-205	0	Agbl4-205;Agbl4-206;Agbl4-201;Agbl4-202;Agbl4-209;Bend5-201;Bend5-204;Bend5-203;Bend5-205	Agbl4;Agbl4;Agbl4;Agbl4;Agbl4;Bend5;Bend5;Bend5;Bend5	0;0;0;0;0;0;0;0;0	TRUE	FALSE	TRUE	TRUE	FALSE	TRUE	TRUE	FALSE	FALSE	fiveUTR	2	2	67621	ENSMUSG00000028545	conserved gene but different region	4	111414760	111415513	754	*	754	75
cg13061698	0.551473029	NA	NA	NA	NA	NA	Gm20537	Gm20537_Exon	9	88456268	88456317	88456316	88456317	50	+	TTGGTCTGGCGCCGCTTGGAATCTGGCTGGTTGTACCCATCAGCTTTGCG	Promoter (<=1kb)	9	88407432	88456616	49185	2	Gm20537-202	299	Gm20537-202;Gm20537-201;Syncrip-201;Syncrip-210;Syncrip-211;Syncrip-207;Syncrip-208;Syncrip-203;Syncrip-205;Syncrip-209	Gm20537;Gm20537;Syncrip;Syncrip;Syncrip;Syncrip;Syncrip;Syncrip;Syncrip;Syncrip	0;0;0;0;0;0;0;0;0;0	TRUE	FALSE	TRUE	FALSE	FALSE	TRUE	TRUE	FALSE	FALSE	Exon	2	5	NA	NA	mapped to different genes	9	88456277	88456476	200	*	200	15
cg13068696	-4.04E-06	NA	NA	NA	NA	NA	Clpb	Clpb_Intron	7	101714033	101714082	101714033	101714034	50	-	CGATGATTATCTCTCACTGAGACATTTTTTACAGATGACGGTCGAGCTGT	Intron (Clpb-205/Clpb, intron 4 of 5)	7	101663633	101722922	59290	1	Clpb-205	50400	Clpb-205;Clpb-201;Clpb-202;Clpb-211;Clpb-208;Clpb-207;Clpb-210	Clpb;Clpb;Clpb;Clpb;Clpb;Clpb;Clpb	0;0;0;0;0;0;0	TRUE	FALSE	FALSE	FALSE	FALSE	FALSE	TRUE	FALSE	FALSE	Intron	21	21	20480	ENSMUSG00000001829	conserved gene and region
cg13071028	0.510833284	NA	NA	NA	NA	NA	Sema3a	Sema3a_fiveUTR	5	13399855	13399904	13399903	13399904	50	-	TAAATCACCTGTTACCTCCAGTTTCCAGATTGTTTGAACTTCTCTGGCCG	5' UTR	5	13125593	13524707	399115	1	Sema3a-206	274262	Sema3a-206;Sema3a-202;Sema3a-203;Sema3a-204;Sema3a-201;Sema3a-205;Sema3a-209	Sema3a;Sema3a;Sema3a;Sema3a;Sema3a;Sema3a;Sema3a	0;0;0;0;0;0;0	TRUE	FALSE	FALSE	TRUE	FALSE	TRUE	TRUE	FALSE	FALSE	fiveUTR	1	9	20346	ENSMUSG00000028883	conserved gene and region
cg13078464	NA	0.261330227	NA	NA	NA	NA	Ihh	Ihh_Intergenic_upstream	1	74964856	74964905	74964856	74964857	50	+	CGGGTAGGCGGGGAGGTGGGCCACTGCTTTATTAAACACAGGGAAAACTA	Downstream (2-3kb)	1	74945315	74951672	6358	2	Ihh-201	-13184	Nhej1-201	Nhej1	0	FALSE	TRUE	FALSE	FALSE	FALSE	FALSE	FALSE	FALSE	FALSE	Intergenic_upstream	2	3	16147	ENSMUSG00000006538	conserved gene and region
cg13094532	NA	NA	-0.000239452	NA	NA	NA	Lrmda	Lrmda_Intron	14	22192304	22192353	22192352	22192353	50	-	GCAGTAGGTCCATCTTGGTGGCATCTGATGTTGATTGGCTTTGTCCTGCG	Intron (Lrmda-201/Lrmda, intron 2 of 6)	14	22019712	23056085	1036374	1	Lrmda-201	172592	Lrmda-201;Lrmda-204;Lrmda-203;Lrmda-206	Lrmda;Lrmda;Lrmda;Lrmda	0;0;0;0	TRUE	FALSE	FALSE	FALSE	FALSE	FALSE	TRUE	FALSE	FALSE	Intron	157	157	76633	ENSMUSG00000063458	conserved gene and region	14	22192352	22192427	76	*	76	8
cg13132708	0.252372983	NA	NA	NA	NA	NA	Nptn	Nptn_Exon	9	58618630	58618679	58618678	58618679	50	+	CTGTCACTGCATTCCTGCTCCCCCTCCCTCTAGCTGGGTTTGTCAAGTCG	Exon (Nptn-212/Nptn, exon 2 of 8)	9	58582240	58651318	69079	1	Nptn-212	36390	Nptn-212;Nptn-201;Nptn-213;Nptn-206;Nptn-203;Nptn-202;Nptn-211;Nptn-207;Nptn-204	Nptn;Nptn;Nptn;Nptn;Nptn;Nptn;Nptn;Nptn;Nptn	0;0;0;0;0;0;0;0;0	TRUE	FALSE	FALSE	FALSE	FALSE	TRUE	TRUE	FALSE	FALSE	Exon	20	22	20320	ENSMUSG00000032336	conserved gene but different region	9	58618678	58618932	255	*	255	20
cg13153497	NA	NA	NA	NA	-0.232664319	NA	Faxc	Faxc_Exon	4	21931799	21931848	21931799	21931800	50	+	CGTATCTGCTCCACGAACTCCTGGTCATTAGGTGAGCCGGAGAGAGGGCC	Promoter (<=1kb)	4	21931329	21994146	62818	1	Faxc-204	470	Faxc-204;Faxc-201;Faxc-202;Faxc-203	Faxc;Faxc;Faxc;Faxc	0;0;0;0	TRUE	FALSE	TRUE	FALSE	FALSE	TRUE	TRUE	FALSE	FALSE	Exon	5	5	76132	ENSMUSG00000028246	conserved gene and region	4	21931002	21931985	984	*	984	98
cg13170453	-0.171093546	NA	NA	NA	NA	NA	Gdf6	Gdf6_Exon	4	9859336	9859385	9859336	9859337	50	+	CGATCTCTCGCACACTCCTCTCCGGAGACAGAAGTATTTGTTTGATGTGT	Exon (Gdf6-201/Gdf6, exon 2 of 2)	4	9844372	9862345	17974	1	Gdf6-201	14964	Gdf6-201	Gdf6	0	TRUE	FALSE	FALSE	FALSE	FALSE	TRUE	FALSE	FALSE	FALSE	Exon	3	11	242316	ENSMUSG00000051279	conserved gene and region
cg13202239	NA	NA	NA	NA	2.075718341	NA	Ntn1	Ntn1_Intron	11	68399735	68399784	68399783	68399784	50	+	ATTTTCTGTCTGTGAAAGCCTTTCTTCCCACCTCTGTTCAGATTAGCCCG	Intron (Ntn1-202/Ntn1, intron 2 of 7)	11	68209364	68400823	191460	2	Ntn1-202	1039	Ntn1-202	Ntn1	0	TRUE	FALSE	FALSE	FALSE	FALSE	FALSE	TRUE	FALSE	FALSE	Intron	3	6	18208	ENSMUSG00000020902	conserved gene but different region	11	68399783	68400438	656	*	656	66
cg13205819	NA	NA	NA	NA	0.270141236	0.237584872	Hoxc5	Hoxc5_Intron	15	103010033	103010082	103010081	103010082	50	+	TTAAATAAACTGAACTGGCTTTATGACCGGCTTCCCTAGAAGAACGGGCG	Intron (Hoxc5-202/Hoxc5, intron 1 of 1)	15	102967443	103015676	48234	1	Hoxc5-202	42590	Hoxc5-202;Hoxc5-201;Hoxc6-202;Hoxc6-203;Hoxc6-201	Hoxc5;Hoxc5;Hoxc6;Hoxc6;Hoxc6	0;0;0;0;0	TRUE	FALSE	FALSE	FALSE	FALSE	FALSE	TRUE	FALSE	FALSE	Intron	46	134	15424	ENSMUSG00000022485	mapped to different genes	15	103009987	103010218	232	*	232	17
cg13224508	NA	NA	0.113940488	0.000783285	NA	NA	Cnot6l	Cnot6l_threeUTR	5	96091605	96091654	96091653	96091654	50	+	GCACAACCATCTACATGCTTTCTCTCCTGCTCAGACATGATTTTGGCACG	3' UTR	5	96070333	96161990	91658	2	Cnot6l-210	70336	Cnot6l-210;Cnot6l-208;Cnot6l-201;Cnot6l-202;Cnot6l-203	Cnot6l;Cnot6l;Cnot6l;Cnot6l;Cnot6l	0;0;0;0;0	TRUE	FALSE	FALSE	FALSE	TRUE	TRUE	FALSE	FALSE	FALSE	threeUTR	11	13	231464	ENSMUSG00000034724	conserved gene and region
cg13235828	-0.076745329	NA	NA	NA	NA	NA	Fgfr2	Fgfr2_Exon	7	130198423	130198472	130198471	130198472	50	-	CAGAACTGTCAACCATGCAGAGTGAAAGGATATCCCAATAGAATTACCCG	Exon (Fgfr2-207/Fgfr2, exon 6 of 16)	7	130162451	130266263	103813	2	Fgfr2-211	67791	Fgfr2-211;Fgfr2-217;Fgfr2-207;Fgfr2-226;Fgfr2-215;Fgfr2-201;Fgfr2-202;Fgfr2-203;Fgfr2-204;Fgfr2-205;Fgfr2-206;Fgfr2-208;Fgfr2-209;Fgfr2-210;Fgfr2-212;Fgfr2-213;Fgfr2-214;Fgfr2-216;Fgfr2-222;Fgfr2-225;Fgfr2-218	Fgfr2;Fgfr2;Fgfr2;Fgfr2;Fgfr2;Fgfr2;Fgfr2;Fgfr2;Fgfr2;Fgfr2;Fgfr2;Fgfr2;Fgfr2;Fgfr2;Fgfr2;Fgfr2;Fgfr2;Fgfr2;Fgfr2;Fgfr2;Fgfr2	0;0;0;0;0;0;0;0;0;0;0;0;0;0;0;0;0;0;0;0;0	TRUE	FALSE	FALSE	FALSE	FALSE	TRUE	TRUE	FALSE	FALSE	Exon	12	79	14183	ENSMUSG00000030849	conserved gene but different region
cg13258110	NA	0.110188317	NA	0.455016116	NA	NA	Sp2	Sp2_Intergenic_upstream	11	96997463	96997512	96997511	96997512	50	-	TGTGGTGTCTGGGGCCCGGGGCCTCTCATTTGTGGGGACGTGCTGTGGCG	Distal Intergenic	11	96954219	96982959	28741	2	Sp2-201	-14553	NA	NA	NA	FALSE	TRUE	FALSE	FALSE	FALSE	FALSE	FALSE	FALSE	TRUE	Intergenic_upstream	1	1	78912	ENSMUSG00000018678	mapped to different genes	11	96997479	96997682	204	*	204	19
cg13275896	NA	NA	NA	0.411442773	NA	NA	Cpeb2	Cpeb2_Intergenic_downstream	5	43339231	43339280	43339231	43339232	50	-	CGACAATGCAGTGCTTTCTGCACCATCTGCTGGCTCTGCAAAGGTAATTA	Distal Intergenic	5	43237315	43246459	9145	1	Cpeb2-203	101965	NA	NA	NA	FALSE	TRUE	FALSE	FALSE	FALSE	FALSE	FALSE	FALSE	TRUE	Intergenic_downstream	1	11	231207	ENSMUSG00000039782	mapped to different genes
cg13326443	-0.000482475	NA	NA	NA	NA	NA	Kcna1	Kcna1_Exon	6	126642173	126642222	126642173	126642174	50	-	CGATGGCACACAAGGAGCCCACGATCTTGCCTCCAATTGTCACAGGGTAC	Exon (Kcna1-201/Kcna1, exon 2 of 2)	6	126640397	126644796	4400	2	Kcna1-201	2574	Kcna1-201;Kcna1-202;Kcna1-203	Kcna1;Kcna1;Kcna1	0;0;0	TRUE	FALSE	FALSE	FALSE	FALSE	TRUE	FALSE	FALSE	FALSE	Exon	9	12	16485	ENSMUSG00000047976	conserved gene and region
cg13342658	NA	NA	NA	NA	-0.230620573	NA	Nkx2-2	Nkx2-2_Exon	2	147188286	147188335	147188286	147188287	50	-	CGATTGCTAAGCTGCGGACAATGAGCGAAATGTAGACAAATGTCCCGCTC	Exon (6430503K07Rik-201/6430503K07Rik-201, exon 3 of 3)	2	147186305	147194243	7939	2	Nkx2-2-202	5908	Nkx2-2-203;Nkx2-2-201;Nkx2-2-202;Nkx2-2-204	Nkx2-2;Nkx2-2;Nkx2-2;Nkx2-2	0;0;0;0	TRUE	FALSE	FALSE	FALSE	FALSE	TRUE	TRUE	FALSE	FALSE	Exon	15	30	18088	ENSMUSG00000027434	conserved gene but different region	2	147188041	147188404	364	*	364	26
cg13373685	NA	NA	NA	NA	-0.260487776	NA	Hoxc5	Hoxc5_Exon	15	103014185	103014234	103014233	103014234	50	-	CATCCAGGTACTGCTACGGCGGATTGGACTTAAGCATCACTTTCCCACCG	Exon (Hoxc5-201/Hoxc5, exon 1 of 2)	15	102967443	103015676	48234	1	Hoxc5-202	46742	Hoxc4-202;Hoxc5-202;Hoxc5-201;Hoxc6-202;Hoxc6-203;Hoxc6-201	Hoxc4;Hoxc5;Hoxc5;Hoxc6;Hoxc6;Hoxc6	0;0;0;0;0;0	TRUE	FALSE	FALSE	FALSE	FALSE	TRUE	TRUE	FALSE	FALSE	Exon	72	134	15424	ENSMUSG00000022485	mapped to different genes	15	103014167	103014734	568	*	568	41
cg13421440	NA	NA	NA	NA	-0.163607584	-0.533200007	Rtca	Rtca_fiveUTR	3	116506946	116506995	116506946	116506947	50	+	CGAATCATTTCCAGTCCAGATAAATGTTGAGGCCTTCAGGTCATAATACT	5' UTR	3	116488963	116508208	19246	2	Rtca-201	1213	Rtca-201;Rtca-203;Rtca-205;Rtca-204	Rtca;Rtca;Rtca;Rtca	0;0;0;0	TRUE	FALSE	FALSE	TRUE	TRUE	TRUE	TRUE	FALSE	FALSE	fiveUTR	1	1	66368	ENSMUSG00000000339	conserved gene but different region
cg13428642	NA	NA	NA	NA	-0.132646696	NA	Hoxb9	Hoxb9_Promoter	11	96271187	96271236	96271235	96271236	50	-	GATAGCACATTGCATCAGCATAAAACAATCCATCCTCGATATGGAGTGCG	Promoter (<=1kb)	11	96271457	96276595	5139	1	Hoxb9-201	-270	Hoxb9-201;Hoxb9-202	Hoxb9;Hoxb9	0;0	FALSE	TRUE	TRUE	FALSE	FALSE	FALSE	FALSE	FALSE	FALSE	Promoter	7	22	15417	ENSMUSG00000020875	mapped to different genes	11	96271235	96271356	122	*	122	12
cg13459195	NA	0.020441708	NA	NA	0.288087974	NA	Celf4	Celf4_Exon	18	25486855	25486904	25486855	25486856	50	-	CGTCTTTGGGCCGCTTCAGCTGCACCTTGAGCCTCTTCATGCCGATCTGG	Promoter (<=1kb)	18	25479488	25486897	7410	2	Celf4-208	0	Celf4-202;Celf4-201;Celf4-203;Celf4-207;Celf4-206;Celf4-208;Celf4-204;Celf4-210	Celf4;Celf4;Celf4;Celf4;Celf4;Celf4;Celf4;Celf4	0;0;0;0;0;0;0;0	TRUE	FALSE	TRUE	FALSE	FALSE	TRUE	FALSE	FALSE	FALSE	Exon	31	59	108013	ENSMUSG00000024268	conserved gene but different region	18	25486659	25486867	209	*	209	18
cg13466539	NA	0.038353083	NA	NA	NA	NA	Ehbp1	Ehbp1_Exon	11	22285515	22285564	22285563	22285564	50	+	TCCTGGTAGGAGGCCACAAACTGGAACTTGGATGCATGTTTTCCCACACG	Promoter (<=1kb)	11	22005828	22285838	280011	2	Ehbp1-201	274	Ehbp1-201;Ehbp1-202;Ehbp1-207;Ehbp1-203;Ehbp1-205	Ehbp1;Ehbp1;Ehbp1;Ehbp1;Ehbp1	0;0;0;0;0	TRUE	FALSE	TRUE	FALSE	FALSE	TRUE	TRUE	FALSE	FALSE	Exon	11	45	216565	ENSMUSG00000042302	conserved gene and region
cg13467605	-0.48021912	NA	NA	NA	NA	NA	Arid5b	Arid5b_Exon	10	68277993	68278042	68278041	68278042	50	+	GGATAAAAGTTGCCGGCTGGTCCTCTCTTCCCACAACAGCTGGAGCTCCG	Promoter (<=1kb)	10	68092520	68278740	186221	2	Arid5b-204	698	Arid5b-204;Arid5b-201;Arid5b-202	Arid5b;Arid5b;Arid5b	0;0;0	TRUE	FALSE	TRUE	FALSE	FALSE	TRUE	FALSE	FALSE	FALSE	Exon	5	33	71371	ENSMUSG00000019947	conserved gene and region
cg13529847	-0.115496409	NA	NA	NA	NA	NA	Gpatch2l	Gpatch2l_Intergenic_upstream	12	86216861	86216910	86216909	86216910	50	-	CCACACAATTCTCTCAATTAACGATAGGCAGAAATTAATTTTTCCCCTCG	Distal Intergenic	12	86241858	86291784	49927	1	Gpatch2l-204	-24997	NA	NA	NA	FALSE	TRUE	FALSE	FALSE	FALSE	FALSE	FALSE	FALSE	TRUE	Intergenic_upstream	13	17	70373	ENSMUSG00000021254	conserved gene but different region	12	86216882	86217003	122	*	122	9
cg13544332	NA	NA	NA	-0.766558227	NA	NA	Bcl9l	Bcl9l_Intron	9	44498891	44498940	44498891	44498892	50	+	CGTTACTGGTCTCCAGAAGAGCCCAGCTGCAGCCCCGGGGCCCCGCCAGG	Intron (Bcl9l-206/Bcl9l, intron 1 of 7)	9	44482825	44510422	27598	1	Bcl9l-206	16066	Bcl9l-206;Bcl9l-202;Bcl9l-203;Bcl9l-205;Bcl9l-201;Bcl9l-204	Bcl9l;Bcl9l;Bcl9l;Bcl9l;Bcl9l;Bcl9l	0;0;0;0;0;0	TRUE	FALSE	FALSE	FALSE	FALSE	FALSE	TRUE	FALSE	FALSE	Intron	5	9	80288	ENSMUSG00000063382	conserved gene but different region	9	44498867	44499178	312	*	312	28
cg13585349	0.222862544	NA	NA	NA	NA	NA	Gm37013	Gm37013_Intron	18	37178583	37178632	37178631	37178632	50	+	GAGTGGGCGGTAGGCAGGCTCCAGAGTGCTGTCTGGCAAGATAGTCCCCG	Intron (Pcdha1-202/Pcdha1, intron 3 of 4)	18	36969916	37833296	863381	1	Gm37013-201	208667	Gm37013-201;Gm37388-201;Gm42416-201;Pcdha1-202;Pcdha1-201;Pcdha11-201;Pcdha11-202;Pcdha11-203;Pcdha11-204;Pcdha12-201;Pcdha2-201;Pcdha2-202;Pcdha3-201;Pcdha4-202;Pcdha4-201;Pcdha5-201;Pcdha6-202;Pcdha6-201;Pcdha6-203;Pcdha7-201;Pcdha8-201;Pcdha9-201;Pcdhac1-201;Pcdhac2-201	Gm37013;Gm37388;Gm42416;Pcdha1;Pcdha1;Pcdha11;Pcdha11;Pcdha11;Pcdha11;Pcdha12;Pcdha2;Pcdha2;Pcdha3;Pcdha4;Pcdha4;Pcdha5;Pcdha6;Pcdha6;Pcdha6;Pcdha7;Pcdha8;Pcdha9;Pcdhac1;Pcdhac2	0;0;0;0;0;0;0;0;0;0;0;0;0;0;0;0;0;0;0;0;0;0;0;0	TRUE	FALSE	FALSE	FALSE	FALSE	FALSE	TRUE	FALSE	FALSE	Intron	1	14	100384868	ENSMUSG00000103458	mapped to different genes
cg13636207	-0.342153472	NA	NA	NA	NA	NA	Gata2	Gata2_Intron	6	88197422	88197471	88197470	88197471	50	+	GATTATTAAAAAGTTCATTTCCTGGCGAATCGGGTGACGTCAGGGGCTCG	Intron (Gata2-202/Gata2, intron 1 of 5)	6	88193891	88207032	13142	1	Gata2-202	3531	Gata2-202;Gata2-203;Gata2-201;Gata2-205	Gata2;Gata2;Gata2;Gata2	0;-863;0;-3448	TRUE	FALSE	FALSE	FALSE	FALSE	FALSE	TRUE	FALSE	FALSE	Intron	3	12	14461	ENSMUSG00000015053	conserved gene and region	6	88197447	88197596	150	*	150	17
cg13649253	NA	NA	NA	NA	0.961819783	NA	Nfix	Nfix_Exon	8	84716244	84716293	84716292	84716293	50	-	TAGCAAAAATGACCCCGGGACTTTGCCCTGGCCGCTACCGTTGGGCTGCG	Exon (Nfix-204/Nfix, exon 9 of 11)	8	84704712	84773396	68685	2	Nfix-204	57103	Nfix-204;Nfix-201;Nfix-202;Nfix-203;Nfix-206;Nfix-205	Nfix;Nfix;Nfix;Nfix;Nfix;Nfix	0;0;0;0;0;0	TRUE	FALSE	FALSE	FALSE	FALSE	TRUE	TRUE	FALSE	FALSE	Exon	20	49	18032	ENSMUSG00000001911	conserved gene but different region	8	84716235	84716387	153	*	153	15
cg13656158	0.088504585	NA	NA	NA	NA	NA	Wfs1	Wfs1_Exon	5	36967003	36967052	36967051	36967052	50	-	AGGCAGCTGATGGCCTTGAGCTCGAAGACAGGCCACTTGCTGCCCAGGCG	Exon (Wfs1-201/Wfs1, exon 8 of 8)	5	36966104	36989205	23102	2	Wfs1-201	22153	Wfs1-201;Wfs1-202;Wfs1-203	Wfs1;Wfs1;Wfs1	0;0;9904	TRUE	FALSE	FALSE	FALSE	FALSE	TRUE	FALSE	FALSE	FALSE	Exon	2	2	22393	ENSMUSG00000039474	conserved gene and region	5	36966860	36967182	323	*	323	23
cg13656236	NA	0.041841548	NA	NA	NA	0.026047926	Nkx2-2	Nkx2-2_Exon	2	147188384	147188433	147188384	147188385	50	-	CGAAATAATACATGATTGACGCTCTCTTTCAATGTGTCCTAACTGTTTGG	Exon (6430503K07Rik-201/6430503K07Rik-201, exon 3 of 3)	2	147186305	147194243	7939	2	Nkx2-2-202	5810	Nkx2-2-203;Nkx2-2-201;Nkx2-2-202;Nkx2-2-204	Nkx2-2;Nkx2-2;Nkx2-2;Nkx2-2	0;0;0;0	TRUE	FALSE	FALSE	FALSE	FALSE	TRUE	TRUE	FALSE	FALSE	Exon	15	30	18088	ENSMUSG00000027434	conserved gene but different region	2	147188041	147188404	364	*	364	26
cg13681420	NA	NA	-0.013465504	NA	NA	NA	Ddx5	Ddx5_threeUTR	11	106783271	106783320	106783319	106783320	50	+	CCAAGAAGCCAGGATTCACTTGAGAATGTGTCTCTCTCTGGCAGGTCTCG	3' UTR	11	106780355	106788532	8178	2	Ddx5-201	5212	Ddx5-201;Ddx5-208;Ddx5-205;Ddx5-207;Ddx5-203;Ddx5-202;Ddx5-209;Ddx5-206;Ddx5-204;Polg2-201;Polg2-203;Polg2-206;Polg2-204;Polg2-202	Ddx5;Ddx5;Ddx5;Ddx5;Ddx5;Ddx5;Ddx5;Ddx5;Ddx5;Polg2;Polg2;Polg2;Polg2;Polg2	0;0;0;0;0;0;2730;0;0;-3756;-3734;-3798;-3798;-3769	TRUE	FALSE	FALSE	FALSE	TRUE	TRUE	TRUE	FALSE	FALSE	threeUTR	5	6	13207	ENSMUSG00000020719	conserved gene but different region
cg13692433	NA	NA	NA	NA	-1.231797586	NA	Ncam1	Ncam1_fiveUTR	9	49798904	49798953	49798904	49798905	50	-	CGCTGATCGGAGAATGAGTGACAGTCCCAGCCTCAGCACACTCGCAACTC	Promoter (<=1kb)	9	49502136	49798925	296790	2	Ncam1-204	0	Ncam1-204;Ncam1-202;Ncam1-201;Ncam1-203;Ncam1-207	Ncam1;Ncam1;Ncam1;Ncam1;Ncam1	0;0;0;0;0	TRUE	FALSE	TRUE	TRUE	FALSE	TRUE	FALSE	FALSE	FALSE	fiveUTR	2	16	17967	ENSMUSG00000039542	conserved gene and region	9	49798889	49799056	168	*	168	16
cg13694139	NA	NA	-0.271098669	NA	NA	NA	Clpb	Clpb_Intron	7	101714027	101714076	101714075	101714076	50	-	AGTTTCCGATGATTATCTCTCACTGAGACATTTTTTACAGATGACGGTCG	Intron (Clpb-205/Clpb, intron 4 of 5)	7	101663633	101722922	59290	1	Clpb-205	50394	Clpb-205;Clpb-201;Clpb-202;Clpb-211;Clpb-208;Clpb-207;Clpb-210	Clpb;Clpb;Clpb;Clpb;Clpb;Clpb;Clpb	0;0;0;0;0;0;0	TRUE	FALSE	FALSE	FALSE	FALSE	FALSE	TRUE	FALSE	FALSE	Intron	21	21	20480	ENSMUSG00000001829	conserved gene and region
cg13702222	NA	NA	-0.288423661	NA	NA	NA	Mbnl1	Mbnl1_fiveUTR	3	60528754	60528803	60528802	60528803	50	-	AGGTTGGTACTAAGAAGTGCCTTTCCTGACGTCTCTGCTGCTTGGAACCG	5' UTR	3	60472830	60595764	122935	1	Mbnl1-222	55924	Mbnl1-222;Mbnl1-221;Mbnl1-216;Mbnl1-220;Mbnl1-211;Mbnl1-204;Mbnl1-201;Mbnl1-209;Mbnl1-202;Mbnl1-225;Mbnl1-217;Mbnl1-203;Mbnl1-218;Mbnl1-208;Mbnl1-219;Mbnl1-214;Mbnl1-207;Mbnl1-205;Mbnl1-212	Mbnl1;Mbnl1;Mbnl1;Mbnl1;Mbnl1;Mbnl1;Mbnl1;Mbnl1;Mbnl1;Mbnl1;Mbnl1;Mbnl1;Mbnl1;Mbnl1;Mbnl1;Mbnl1;Mbnl1;Mbnl1;Mbnl1	0;0;0;0;0;0;0;0;0;0;0;0;0;0;0;0;0;0;0	TRUE	FALSE	FALSE	TRUE	FALSE	TRUE	TRUE	FALSE	FALSE	fiveUTR	3	36	56758	ENSMUSG00000027763	conserved gene and region
cg13721678	0.065027645	0.034999713	NA	NA	0.590269639	0.144993517	Cadps2	Cadps2_Exon	6	23410880	23410929	23410880	23410881	50	+	CGGGCACAGTACTCATCTAACACAAAGACTTGGCCAGGGCTAAACCATCC	Exon (Cadps2-213/Cadps2, exon 14 of 30)	6	23262773	23839137	576365	2	Cadps2-213	428208	Cadps2-213;Cadps2-205;Cadps2-212;Cadps2-201;Cadps2-209;Cadps2-206;Cadps2-207;Cadps2-202;Cadps2-204	Cadps2;Cadps2;Cadps2;Cadps2;Cadps2;Cadps2;Cadps2;Cadps2;Cadps2	0;0;0;0;0;0;0;0;0	TRUE	FALSE	FALSE	FALSE	FALSE	TRUE	FALSE	FALSE	FALSE	Exon	2	15	320405	ENSMUSG00000017978	conserved gene and region
cg13725272	-0.618901118	NA	NA	NA	NA	NA	Magi1	Magi1_fiveUTR	6	94283822	94283871	94283822	94283823	50	-	CGGCCCCTTTAAGCAGATACAAAGGCTCGGCTTGTTTTGTTACAGTTCAT	Promoter (<=1kb)	6	93675455	94283917	608463	2	Magi1-208	46	Magi1-201;Magi1-202;Magi1-208;Magi1-205;Magi1-204	Magi1;Magi1;Magi1;Magi1;Magi1	0;0;0;0;-797	TRUE	FALSE	TRUE	TRUE	FALSE	TRUE	FALSE	FALSE	FALSE	fiveUTR	8	18	14924	ENSMUSG00000045095	conserved gene but different region	6	94283398	94284030	633	*	633	85
cg13739934	0.237355338	NA	NA	NA	1.893363393	NA	Pou4f1	Pou4f1_Exon	14	104466836	104466885	104466836	104466837	50	+	CGTCTCGTCCAGGCTGGCGAAGAGGTTGCTCTGCAGCTGCAGGCGACACA	Exon (Pou4f1-201/Pou4f1, exon 2 of 3)	14	104461676	104467999	6324	2	Pou4f1-201	1114	Pou4f1-201;Pou4f1-202	Pou4f1;Pou4f1	0;-1471	TRUE	FALSE	FALSE	FALSE	FALSE	TRUE	TRUE	FALSE	FALSE	Exon	5	31	18996	ENSMUSG00000048349	mapped to different genes	14	104465680	104466880	1201	*	1201	169
cg13752936	NA	-0.005972336	NA	NA	NA	NA	Tenm2	Tenm2_Intron	11	36152750	36152799	36152750	36152751	50	-	CGGGGTGAATTTAATTGCTTTAGTTAAGTGGAAATCGGGTTAAAAATGAT	Intron (Tenm2-202/Tenm2, intron 11 of 30)	11	36006656	37235882	1229227	2	Tenm2-202	1083083	Tenm2-202;Tenm2-208;Tenm2-201;Tenm2-204;Tenm2-205	Tenm2;Tenm2;Tenm2;Tenm2;Tenm2	0;0;0;0;0	TRUE	FALSE	FALSE	FALSE	FALSE	FALSE	TRUE	FALSE	FALSE	Intron	47	84	23964	ENSMUSG00000049336	conserved gene and region
cg13754878	NA	NA	NA	NA	0.714044928	-0.09047456	Thtpa	Thtpa_threeUTR	14	55097717	55097766	55097717	55097718	50	-	CGCTAAGCAGCCTCCATTGATTTCCGCTCGTGTTTATAGGATTTCCACTT	3' UTR	14	55094784	55098986	4203	1	Thtpa-201	2933	Ap1g2-209;Ap1g2-207;Ap1g2-203;Ap1g2-202;Ap1g2-201;Ap1g2-211;Ap1g2-204;Ap1g2-206;Ap1g2-210;Thtpa-201	Ap1g2;Ap1g2;Ap1g2;Ap1g2;Ap1g2;Ap1g2;Ap1g2;Ap1g2;Ap1g2;Thtpa	0;1622;0;0;0;0;0;6744;7125;0	TRUE	FALSE	FALSE	FALSE	TRUE	TRUE	FALSE	FALSE	FALSE	threeUTR	4	4	105663	ENSMUSG00000045691	conserved gene and region
cg13757685	NA	0.017219438	NA	NA	NA	NA	Cyp7b1	Cyp7b1_Intron	3	18190072	18190121	18190120	18190121	50	+	CAACAGATGAACAAAGCCCACATTCAAATCTGTAGCTCATTAAAATAACG	Intron (Cyp7b1-201/Cyp7b1, intron 1 of 5)	3	18071950	18243338	171389	2	Cyp7b1-201	53217	Cyp7b1-201	Cyp7b1	0	TRUE	FALSE	FALSE	FALSE	FALSE	FALSE	TRUE	FALSE	FALSE	Intron	15	17	13123	ENSMUSG00000039519	conserved gene and region
cg13761591	0.337504314	NA	NA	NA	NA	NA	Tln2	Tln2_Exon	9	67224051	67224100	67224099	67224100	50	-	GGCTGCACGGACAAGATTGTCTGAGGCTCTTTTCACAGCATTTCCTGCCG	Exon (Tln2-202/Tln2, exon 57 of 58)	9	67217087	67559703	342617	2	Tln2-202	335603	Tln2-202;Tln2-209;Tln2-204;Tln2-207;Tln2-205;Tln2-201;Tln2-208	Tln2;Tln2;Tln2;Tln2;Tln2;Tln2;Tln2	0;0;0;0;0;0;7307	TRUE	FALSE	FALSE	FALSE	FALSE	TRUE	FALSE	FALSE	FALSE	Exon	5	5	70549	ENSMUSG00000052698	conserved gene and region
cg13804575	NA	NA	-0.048487427	NA	NA	NA	Zfp462	Zfp462_Intron	4	54949685	54949734	54949685	54949686	50	+	CGTCTGGGATGGGGAAAGACCAACCAGTTGGGGCTTTCTCCCAGGGCTCC	Intron (Zfp462-204/Zfp462, intron 1 of 2)	4	54945048	55008314	63267	1	Zfp462-204	4637	Zfp462-204;Zfp462-203	Zfp462;Zfp462	0;0	TRUE	FALSE	FALSE	FALSE	FALSE	FALSE	TRUE	FALSE	FALSE	Intron	9	23	242466	ENSMUSG00000060206	conserved gene and region
cg13824077	0.132574783	NA	NA	NA	NA	NA	Nr4a2	Nr4a2_Intron	2	57109287	57109336	57109335	57109336	50	+	CACTTAATGAGGTTCTCTAAAATATATAACCCGTGAAATTGCTAACCCCG	Intron (Nr4a2-201/Nr4a2, intron 5 of 7)	2	57106830	57115038	8209	2	Nr4a2-201	5702	Nr4a2-201;Nr4a2-203;Nr4a2-206;Nr4a2-202;Nr4a2-205;Nr4a2-204	Nr4a2;Nr4a2;Nr4a2;Nr4a2;Nr4a2;Nr4a2	0;0;0;0;0;5037	TRUE	FALSE	FALSE	FALSE	FALSE	FALSE	TRUE	FALSE	FALSE	Intron	7	25	18227	ENSMUSG00000026826	conserved gene and region
cg13834844	NA	NA	NA	NA	-0.551116127	NA	Pax2	Pax2_Intergenic_upstream	19	44671125	44671174	44671173	44671174	50	+	AAACTTCTATTAGTAATGGAGACCTCGCCGGAGACCTTCCGCGGAGAGCG	Distal Intergenic	19	44756045	44837851	81807	1	Pax2-203	-84871	NA	NA	NA	FALSE	TRUE	FALSE	FALSE	FALSE	FALSE	FALSE	FALSE	TRUE	Intergenic_upstream	101	166	18504	ENSMUSG00000004231	conserved gene and region	19	44671150	44671210	61	*	61	7
cg13848598	NA	NA	NA	NA	0.146794266	NA	Adrb1	Adrb1_Exon	19	56723058	56723107	56723058	56723059	50	-	CGTAGTCTCCTTCTACGTGCCCCTGTGCATCATGGCCTTCGTGTACCTGC	Promoter (<=1kb)	19	56722199	56725150	2952	1	Adrb1-201	859	Adrb1-201;Adrb1-202	Adrb1;Adrb1	0;-756	TRUE	FALSE	TRUE	FALSE	FALSE	TRUE	FALSE	FALSE	FALSE	Exon	2	2	11554	ENSMUSG00000035283	conserved gene and region	19	56721990	56723878	1889	*	1889	218
cg13856487	-0.035746746	NA	NA	NA	NA	NA	Ptf1a	Ptf1a_Intergenic_downstream	2	19451631	19451680	19451679	19451680	50	+	TATGTTTTGTGTCTCCATATTTTGATCCGTACGATTAAGCAGATGTTACG	Distal Intergenic	2	19445663	19447501	1839	1	Ptf1a-201	5968	Ptf1a-201	Ptf1a	5968	FALSE	TRUE	FALSE	FALSE	FALSE	FALSE	FALSE	FALSE	TRUE	Intergenic_downstream	14	21	19213	ENSMUSG00000026735	conserved gene and region
cg13940770	NA	NA	NA	NA	0.075217932	NA	Ppp2r2b	Ppp2r2b_fiveUTR	18	42898766	42898815	42898766	42898767	50	+	CGCGCAGGAAACTGTTGTTGATTTTGCGGGTATCAATGTCCTCCTCCATT	Promoter (<=1kb)	18	42758468	42898815	140348	2	Ppp2r2b-206	0	Ppp2r2b-204;Ppp2r2b-202;Ppp2r2b-201;Ppp2r2b-203;Ppp2r2b-208;Ppp2r2b-207;Ppp2r2b-205;Ppp2r2b-206	Ppp2r2b;Ppp2r2b;Ppp2r2b;Ppp2r2b;Ppp2r2b;Ppp2r2b;Ppp2r2b;Ppp2r2b	0;0;0;0;0;0;0;0	TRUE	FALSE	TRUE	TRUE	FALSE	TRUE	TRUE	FALSE	FALSE	fiveUTR	9	15	72930	ENSMUSG00000024500	conserved gene and region	18	42898666	42898793	128	*	128	11
cg13943140	NA	NA	NA	NA	0.930075737	0.374667658	Gm2691	Gm2691_Intergenic_downstream	6	10760258	10760307	10760258	10760259	50	-	CGTTTCTGCTTGATAGCCTGTAACATTTCCATGTAGTGCACTTTGCATGG	Distal Intergenic	6	10774114	10775014	901	2	Gm2691-201	14756	NA	NA	NA	FALSE	TRUE	FALSE	FALSE	FALSE	FALSE	FALSE	FALSE	TRUE	Intergenic_downstream	1	1	100040285	NA	mapped to different genes
cg13965097	NA	-0.065113368	NA	NA	NA	NA	Fam180a	Fam180a_Promoter	6	35326271	35326320	35326319	35326320	50	-	GAATTTTTCTTTAACAAACAGACCCGCGGAACTTGTTAGAGAGCCCGGCG	Promoter (<=1kb)	6	35312668	35326141	13474	2	Fam180a-201	-179	Fam180a-201	Fam180a	-130	FALSE	TRUE	TRUE	FALSE	FALSE	FALSE	FALSE	FALSE	FALSE	Promoter	1	1	208164	ENSMUSG00000047420	conserved gene and region
cg13992970	NA	NA	-0.133097718	NA	NA	NA	Dennd1b	Dennd1b_Intron	1	139011331	139011380	139011331	139011332	50	-	CGAAGAAAAGAAATTGCTTTCTTTGTCAAGGTGTTTTCAATTCAATTCTC	Intron (Dennd1b-209/Dennd1b, intron 2 of 9)	1	138963435	139063718	100284	1	Dennd1b-209	47896	Dennd1b-209;Dennd1b-202;Dennd1b-205;Dennd1b-208;Dennd1b-201	Dennd1b;Dennd1b;Dennd1b;Dennd1b;Dennd1b	0;0;0;0;0	TRUE	FALSE	FALSE	FALSE	FALSE	FALSE	TRUE	FALSE	FALSE	Intron	5	5	329260	ENSMUSG00000056268	conserved gene and region
cg13993270	NA	-0.216645475	NA	NA	NA	NA	Gm17304	Gm17304_Exon	5	106574976	106575025	106575024	106575025	50	-	TATCCTTTTGATGGCTATAATTTATTCCAAATCGTCCCTGGACTGAAACG	Exon (Gm29464-201/Gm29464-201, exon 1 of 1)	5	106609098	106609201	104	1	Gm17304-201	-34122	NA	NA	NA	TRUE	FALSE	FALSE	FALSE	FALSE	TRUE	TRUE	FALSE	FALSE	Exon	9	35	NA	NA	mapped to different genes
cg14153842	NA	-0.105228845	NA	NA	NA	NA	Faah	Faah_Intron	4	115979551	115979600	115979551	115979552	50	-	CGTTTTTAGAGCCGGTAATTGACTCCTTTCAGTTGATAATTCATGGCTTG	Intron (Faah-202/Faah, intron 13 of 14)	4	115967145	116017675	50531	2	Faah-202	38075	Faah-202	Faah	0	TRUE	FALSE	FALSE	FALSE	FALSE	FALSE	TRUE	FALSE	FALSE	Intron	20	20	14073	ENSMUSG00000034171	mapped to different genes	4	115979435	115979564	130	*	130	14
cg14159149	NA	NA	NA	-0.77045079	NA	NA	Foxo6	Foxo6_Intron	4	120282926	120282975	120282974	120282975	50	-	GCCAGCAACTGTGCCAGGAGCGGCTGGCACGGGCTCGTGCCCAGGAGGCG	Intron (Foxo6-201/Foxo6, intron 1 of 1)	4	120267079	120287349	20271	2	Foxo6-201	4374	Foxo6-201	Foxo6	0	TRUE	FALSE	FALSE	FALSE	FALSE	FALSE	TRUE	FALSE	FALSE	Intron	14	42	329934	ENSMUSG00000052135	conserved gene and region	4	120282454	120283157	704	*	704	60
cg14188130	NA	NA	NA	NA	0.587301469	NA	Sp4	Sp4_Exon	12	118261724	118261773	118261772	118261773	50	-	TACCTTCCTTCTCCTTCCCTACAATTAGGACAGGAACAGGCAACTCTTCG	Exon (Sp4-201/Sp4, exon 4 of 6)	12	118234933	118301370	66438	2	Sp4-201	39597	Sp4-201;Sp4-203;Sp4-202	Sp4;Sp4;Sp4	0;0;0	TRUE	FALSE	FALSE	FALSE	FALSE	TRUE	TRUE	FALSE	FALSE	Exon	9	14	20688	ENSMUSG00000025323	conserved gene but different region
cg14237002	-0.77513593	NA	NA	NA	NA	NA	Cpsf6	Cpsf6_Exon	10	117361803	117361852	117361851	117361852	50	-	ATGCTGTGCCCCATATGCCATGGAATCCTAGTTTCCAGGAACAAAGGCCG	Exon (Cpsf6-206/Cpsf6, exon 6 of 11)	10	117344673	117376970	32298	2	Cpsf6-201	15118	Cpsf6-201;Cpsf6-207;Cpsf6-206;Cpsf6-204;Cpsf6-208;Cpsf6-205;Cpsf6-203	Cpsf6;Cpsf6;Cpsf6;Cpsf6;Cpsf6;Cpsf6;Cpsf6	0;0;0;-859;0;0;0	TRUE	FALSE	FALSE	FALSE	FALSE	TRUE	TRUE	FALSE	FALSE	Exon	4	4	432508	ENSMUSG00000055531	conserved gene but different region
cg14238859	-0.275514963	NA	NA	NA	NA	NA	Adsl	Adsl_threeUTR	15	80967121	80967170	80967121	80967122	50	+	CGGCGCATTCGGCAAGAGCTGCCTTTCATGGCCACAGAGAACATCATCAT	3' UTR	15	80948490	80970946	22457	1	Adsl-201	18631	Adsl-201;Adsl-204;Adsl-205;Adsl-212;Adsl-211;Adsl-206;Adsl-207;Adsl-202;Adsl-210	Adsl;Adsl;Adsl;Adsl;Adsl;Adsl;Adsl;Adsl;Adsl	0;0;0;18604;18602;0;18584;5908;0	TRUE	FALSE	FALSE	FALSE	TRUE	TRUE	FALSE	FALSE	FALSE	threeUTR	2	2	11564	ENSMUSG00000022407	conserved gene and region
cg14261840	NA	NA	NA	NA	-0.290849404	NA	Fezf2	Fezf2_Intron	14	12347039	12347088	12347039	12347040	50	+	CGTATCACAACAAACTGCTCAAAGACGCTCCAGCACTTTCAACAGGCCGG	Intron (Fezf2-202/Fezf2, intron 1 of 5)	14	12343388	12348189	4802	2	Fezf2-202	1101	Fezf2-203;Fezf2-201;Fezf2-202	Fezf2;Fezf2;Fezf2	0;0;0	TRUE	FALSE	FALSE	FALSE	FALSE	FALSE	TRUE	FALSE	FALSE	Intron	7	45	54713	ENSMUSG00000021743	conserved gene but different region
cg14314614	-0.089119387	NA	NA	NA	NA	NA	Zmym4	Zmym4_fiveUTR	4	126968095	126968144	126968095	126968096	50	-	CGGGGGGTTAATGGCCTCCAAGGGGCCCCGTGAGTAGGATTATTTTCTCT	Promoter (<=1kb)	4	126861939	126968135	106197	2	Zmym4-201	0	Zmym4-201;Zmym4-209;Zmym4-202	Zmym4;Zmym4;Zmym4	0;0;0	TRUE	FALSE	TRUE	TRUE	FALSE	TRUE	FALSE	FALSE	FALSE	fiveUTR	2	8	67785	ENSMUSG00000042446	conserved gene and region	4	126967482	126968160	679	*	679	84
cg14405266	-0.190069245	NA	NA	NA	NA	NA	Zfp771	Zfp771_fiveUTR	7	127244949	127244998	127244949	127244950	50	+	CGGGTCCTGAGCTTCTGATCCAGCTCCCCGCCTCAGGACACCAAGATGCC	Promoter (<=1kb)	7	127244274	127254803	10530	1	Zfp771-201	675	Zfp771-201;Zfp771-202;Zfp771-203	Zfp771;Zfp771;Zfp771	0;-103;-189	TRUE	FALSE	TRUE	TRUE	FALSE	TRUE	TRUE	FALSE	FALSE	fiveUTR	1	1	244216	ENSMUSG00000054716	conserved gene but different region	7	127244470	127245003	534	*	534	43
cg14427818	NA	NA	0.145578988	NA	NA	NA	Dpyd	Dpyd_Intergenic_upstream	3	118364329	118364378	118364377	118364378	50	-	AGTAAATCCAATAATATTTCTGACAGAATTGATTACAATAATGTCAAACG	Distal Intergenic	3	118562129	119432924	870796	1	Dpyd-201	-197800	NA	NA	NA	FALSE	TRUE	FALSE	FALSE	FALSE	FALSE	FALSE	FALSE	TRUE	Intergenic_upstream	5	29	99586	ENSMUSG00000033308	mapped to different genes
cg14431257	0.246504213	NA	NA	NA	NA	NA	Nfib	Nfib_threeUTR	4	82290628	82290677	82290676	82290677	50	-	AAAATGGATCAACCCTGGTGTGTAGCTAGCAAGCAATAACTGACTACTCG	3' UTR	4	82290173	82505308	215136	2	Nfib-201	214631	Nfib-201;Nfib-203;Nfib-202	Nfib;Nfib;Nfib	0;0;0	TRUE	FALSE	FALSE	FALSE	TRUE	TRUE	FALSE	FALSE	FALSE	threeUTR	11	66	18028	ENSMUSG00000008575	conserved gene and region
cg14453487	NA	NA	NA	NA	-0.519031942	-0.599745209	Ahdc1	Ahdc1_Intron	4	133042970	133043019	133042970	133042971	50	-	CGGTGTGGGCTGGAGCAGCTGCAGTGGTTCGAGTGTCACACTATCTCTCC	Intron (Ahdc1-210/Ahdc1, intron 2 of 3)	4	133011260	133060820	49561	1	Ahdc1-210	31710	Ahdc1-210;Ahdc1-203;Ahdc1-204;Ahdc1-205;Ahdc1-207;Ahdc1-211;Ahdc1-209;Ahdc1-206;Ahdc1-201;Ahdc1-202	Ahdc1;Ahdc1;Ahdc1;Ahdc1;Ahdc1;Ahdc1;Ahdc1;Ahdc1;Ahdc1;Ahdc1	0;0;0;0;0;0;0;0;0;0	TRUE	FALSE	FALSE	FALSE	FALSE	FALSE	TRUE	FALSE	FALSE	Intron	35	49	230793	ENSMUSG00000037692	conserved gene and region
cg14462513	NA	NA	NA	NA	-0.496663405	NA	Hoxc5	Hoxc5_Intron	15	103014571	103014620	103014571	103014572	50	+	CGCCTGGGTTTTATAGGCCATGCGGGGCAAATAAAGAAAAAAAACCTGCG	Intron (Hoxc5-202/Hoxc5, intron 1 of 1)	15	102967443	103015676	48234	1	Hoxc5-202	47128	Hoxc4-202;Hoxc5-202;Hoxc5-201;Hoxc6-202;Hoxc6-203;Hoxc6-201	Hoxc4;Hoxc5;Hoxc5;Hoxc6;Hoxc6;Hoxc6	0;0;0;0;0;0	TRUE	FALSE	FALSE	FALSE	FALSE	FALSE	TRUE	FALSE	FALSE	Intron	46	134	15424	ENSMUSG00000022485	mapped to different genes
cg14467787	NA	NA	NA	NA	-0.318232505	NA	Evx2	Evx2_Promoter	2	74659620	74659669	74659668	74659669	50	+	TGTCATTCATCAAAAAGTAGCGCCCGCTCGTCATTAAGGTACGAATGACG	Promoter (<=1kb)	2	74652991	74659557	6567	2	Evx2-201	-63	Evx2-201;Evx2-202	Evx2;Evx2	0;-201	FALSE	TRUE	TRUE	FALSE	FALSE	FALSE	FALSE	FALSE	FALSE	Promoter	9	35	14029	ENSMUSG00000001815	conserved gene and region	2	74659459	74659676	218	*	218	14
cg14472440	-0.229204101	NA	NA	NA	NA	NA	Rps24	Rps24_Intron	14	24779251	24779300	24779299	24779300	50	-	GCCTTGGCAGCAGAAGGTGACATCTGGTGACTAATGGCCGCGGCTGCGCG	Intron (4930428N03Rik-205/4930428N03Rik-205, intron 3 of 5)	14	24491149	24491989	841	1	Rps24-209	288151	NA	NA	NA	TRUE	FALSE	FALSE	FALSE	FALSE	FALSE	TRUE	FALSE	FALSE	Intron	7	12	20088	ENSMUSG00000025290	mapped to different genes	14	24779188	24779323	136	*	136	14
cg14497036	NA	0.14111387	NA	NA	NA	NA	Antxr2	Antxr2_Intron	5	97935169	97935218	97935169	97935170	50	-	CGATCTGTACCTGCTGTCCCCTGTCACTCCCTGGAAACTTGGCGGCAGAT	Intron (Antxr2-201/Antxr2, intron 16 of 16)	5	97882783	98030962	148180	2	Antxr2-201	95744	Antxr2-201;Antxr2-202	Antxr2;Antxr2	0;0	TRUE	FALSE	FALSE	FALSE	FALSE	FALSE	TRUE	FALSE	FALSE	Intron	3	4	71914	ENSMUSG00000029338	conserved gene and region
cg14509153	NA	NA	NA	-0.213939466	NA	NA	Nr5a1	Nr5a1_Promoter	2	38718830	38718879	38718878	38718879	50	+	TCAGATCCGATGCCAATGTCAGAGAAGTCCATAGTGCTGGGTCAAGGCCG	Promoter (4-5kb)	2	38692660	38714542	21883	2	Nr5a1-201	-4288	Nr5a1-201;Nr6a1-202;Nr6a1-210;Nr6a1-201	Nr5a1;Nr6a1;Nr6a1;Nr6a1	0;0;0;0	TRUE	FALSE	TRUE	FALSE	FALSE	FALSE	TRUE	FALSE	FALSE	Promoter	3	7	26423	ENSMUSG00000026751	conserved gene and region
cg14540643	NA	NA	NA	NA	-0.884640915	NA	Gnao1	Gnao1_Exon	8	93811368	93811417	93811368	93811369	50	-	CGCCCTCGAGCGGAGCAAGGCGATTGAGAAAAACCTCAAAGAGGATGGCA	Exon (Gnao1-202/Gnao1, exon 1 of 2)	8	93809966	93950403	140438	1	Gnao1-206	1402	Gnao1-206;Gnao1-202;Gnao1-201;Gnao1-203;Gnao1-207	Gnao1;Gnao1;Gnao1;Gnao1;Gnao1	0;0;0;0;0	TRUE	FALSE	FALSE	FALSE	FALSE	TRUE	TRUE	FALSE	FALSE	Exon	8	13	14681	ENSMUSG00000031748	conserved gene and region	8	93811274	93811435	162	*	162	16
cg14580567	-0.559891596	NA	NA	NA	NA	NA	Hhip	Hhip_fiveUTR	8	80057996	80058045	80058044	80058045	50	+	CACAGCCTCTCATGTTTCGTTCCCTCTTTTCTTCTTCTTTTTAACTAGCG	Promoter (<=1kb)	8	79965853	80058006	92154	2	Hhip-201	0	Hhip-201	Hhip	0	TRUE	FALSE	TRUE	TRUE	FALSE	TRUE	FALSE	FALSE	FALSE	fiveUTR	1	2	15245	ENSMUSG00000064325	mapped to different genes	8	80057847	80058292	446	*	446	44
cg14593595	0.289293447	NA	NA	NA	NA	NA	Maf	Maf_Intergenic_downstream	8	115632815	115632864	115632863	115632864	50	-	TTAGTGGCCACAGCACGATTCTGAAAATATACCTTCCTTACGATTTAACG	Distal Intergenic	8	115682942	115707096	24155	2	Maf-201	74281	NA	NA	NA	FALSE	TRUE	FALSE	FALSE	FALSE	FALSE	FALSE	FALSE	TRUE	Intergenic_downstream	7	23	17132	ENSMUSG00000055435	conserved gene and region
cg14676280	NA	NA	-0.712899876	NA	NA	NA	Srrm1	Srrm1_Exon	4	135346367	135346416	135346415	135346416	50	+	ACACTCACTCTGCTGTGACCTAATAAGGTGATGGTGCTATACTTCAGACG	Exon (Srrm1-212/Srrm1, exon 3 of 16)	4	135320484	135353321	32838	2	Srrm1-203	6905	Srrm1-203;Srrm1-202;Srrm1-208;Srrm1-201;Srrm1-212;Srrm1-204;Srrm1-214;Srrm1-205;Srrm1-207;Srrm1-209;Srrm1-206	Srrm1;Srrm1;Srrm1;Srrm1;Srrm1;Srrm1;Srrm1;Srrm1;Srrm1;Srrm1;Srrm1	0;0;0;0;0;0;0;0;0;0;0	TRUE	FALSE	FALSE	FALSE	FALSE	TRUE	TRUE	FALSE	FALSE	Exon	7	8	51796	ENSMUSG00000028809	conserved gene but different region
cg14689355.2	NA	NA	NA	NA	-1.664378154	-4.265412389	Acvr2a	Acvr2a_fiveUTR	2	48814452	48814501	48814452	48814453	50	+	CGGAGCTGACAGTGATTTTGACAGTGATTTAAACCCGCTTTTGTTGTTGT	Promoter (<=1kb)	2	48814109	48903269	89161	1	Acvr2a-201	343	Acvr2a-201;Gm13489-201	Acvr2a;Gm13489	0;-3897	TRUE	FALSE	TRUE	TRUE	FALSE	TRUE	FALSE	FALSE	FALSE	fiveUTR	7	10	11480	ENSMUSG00000052155	conserved gene but different region	2	48813661	48814558	898	*	898	142
cg14699463	NA	-0.196336926	NA	NA	NA	NA	Chrd	Chrd_threeUTR	16	20736037	20736086	20736085	20736086	50	+	TCCTGCAAAGTGTCCTTTGTGGGGCTGATGCCCTGATCCCAGTCCAGACG	3' UTR	16	20733127	20738152	5026	1	Chrd-202	2910	Chrd-202;Chrd-201;Chrd-204;Chrd-205;Chrd-207;Chrd-209;Chrd-210;Chrd-208;Chrd-206;Chrd-203;Thpo-202	Chrd;Chrd;Chrd;Chrd;Chrd;Chrd;Chrd;Chrd;Chrd;Chrd;Thpo	0;0;0;0;0;0;0;2603;2534;-120;-1526	TRUE	FALSE	FALSE	FALSE	TRUE	TRUE	FALSE	FALSE	FALSE	threeUTR	1	1	12667	ENSMUSG00000006958	conserved gene and region
cg14705099	0.382226695	NA	NA	NA	NA	NA	Nkain2	Nkain2_fiveUTR	10	32889670	32889719	32889670	32889671	50	-	CGTGCACCTGCCACTGCAATAACCCATGGTTTCCGAGACCCCTGCCACAG	Promoter (<=1kb)	10	31693637	32889696	1196060	2	Nkain2-204	0	Nkain2-203;Nkain2-204;Nkain2-205;Nkain2-206;Nkain2-201	Nkain2;Nkain2;Nkain2;Nkain2;Nkain2	0;0;0;0;743	TRUE	FALSE	TRUE	TRUE	FALSE	TRUE	FALSE	FALSE	FALSE	fiveUTR	2	5	432450	ENSMUSG00000069670	conserved gene but different region
cg14732096	-1.146275425	NA	NA	NA	NA	NA	Arid5b	Arid5b_Promoter	10	68280022	68280071	68280070	68280071	50	-	AAACTTAAGAGCGACAGAACAAGGAACAGGCAGAGACTGCAAAGCCCTCG	Promoter (1-2kb)	10	68092520	68278740	186221	2	Arid5b-204	-1331	Arid5b-204;Arid5b-201;Arid5b-202	Arid5b;Arid5b;Arid5b	0;0;0	FALSE	TRUE	TRUE	FALSE	FALSE	FALSE	FALSE	FALSE	FALSE	Promoter	16	33	71371	ENSMUSG00000019947	conserved gene and region	10	68280070	68280167	98	*	98	9
cg14741527	NA	NA	NA	NA	-0.473693222	NA	Hsd17b12	Hsd17b12_Exon	2	94241371	94241420	94241371	94241372	50	-	CGCAAATGCTTTTTGGGGTAAGGGCTTCCGGCTATTGAGTTATGTACAGC	Exon (Mir129b-201/Mir129b-201, exon 1 of 1)	2	94032689	94157964	125276	2	Hsd17b12-201	-83456	NA	NA	NA	TRUE	FALSE	FALSE	FALSE	FALSE	TRUE	TRUE	FALSE	FALSE	Exon	5	19	56348	ENSMUSG00000027195	mapped to different genes	2	94241115	94241769	655	*	655	63
cg14769599	1.18848653	NA	NA	NA	NA	NA	Ncapg2	Ncapg2_Exon	12	116425797	116425846	116425797	116425798	50	-	CGATCAAATGCTGCATTGTTGTTTGTTGAAGCATTTCCTATTAGGGATCC	Exon (Ncapg2-201/Ncapg2, exon 12 of 29)	12	116405402	116461611	56210	1	Ncapg2-201	20395	Ncapg2-201	Ncapg2	0	TRUE	FALSE	FALSE	FALSE	FALSE	TRUE	FALSE	FALSE	FALSE	Exon	1	1	76044	ENSMUSG00000042029	conserved gene and region
cg14791398	NA	NA	NA	0.145493772	NA	NA	Satb1	Satb1_Exon	17	51809190	51809239	51809238	51809239	50	+	CACTCACATTGTTAGACATTTCTGAATGTTCTTTCCCCTGAGTTGCCTCG	Exon (Satb1-208/Satb1, exon 2 of 11)	17	51736187	51832672	96486	2	Satb1-208	23433	Satb1-208;Satb1-213;Satb1-204;Satb1-214;Satb1-203;Satb1-211;Satb1-207;Satb1-206;Satb1-202;Satb1-201;Satb1-209;Satb1-210	Satb1;Satb1;Satb1;Satb1;Satb1;Satb1;Satb1;Satb1;Satb1;Satb1;Satb1;Satb1	0;0;0;0;0;0;0;0;0;0;0;0	TRUE	FALSE	FALSE	FALSE	FALSE	TRUE	FALSE	FALSE	FALSE	Exon	6	36	20230	ENSMUSG00000023927	conserved gene and region
cg14807945	NA	-0.00990258	NA	NA	NA	NA	Zeb2	Zeb2_Intron	2	45024643	45024692	45024691	45024692	50	-	CACTTGCCTTCCGAACAACTGCACAACAGGTGCAAATTAAAATGAAAACG	Intron (Zeb2-212/Zeb2, intron 3 of 10)	2	44983632	45117395	133764	2	Zeb2-212	92703	Zeb2-212;Zeb2-213;Zeb2-201;Zeb2-202;Zeb2-215;Zeb2-214;Zeb2-203;Zeb2-221;Zeb2-220;Zeb2-227;Zeb2-216;Zeb2-229;Zeb2-218;Zeb2-222;Zeb2-208;Zeb2-228;Zeb2-226;Zeb2-209;Zeb2-224;Zeb2-207;Zeb2-219	Zeb2;Zeb2;Zeb2;Zeb2;Zeb2;Zeb2;Zeb2;Zeb2;Zeb2;Zeb2;Zeb2;Zeb2;Zeb2;Zeb2;Zeb2;Zeb2;Zeb2;Zeb2;Zeb2;Zeb2;Zeb2	0;0;0;0;0;0;0;0;0;0;0;0;0;0;0;0;0;0;0;0;0	TRUE	FALSE	FALSE	FALSE	FALSE	FALSE	TRUE	FALSE	FALSE	Intron	103	158	24136	ENSMUSG00000026872	conserved gene and region
cg14817774	0.071026429	NA	NA	NA	NA	NA	Srsf7	Srsf7_threeUTR	17	80204884	80204933	80204884	80204885	50	+	CGATCACCGTCTCAAATTTTCTGCCCTTTAAAGAATAAGGTGAAGCTAGG	3' UTR	17	80200080	80207305	7226	2	Srsf7-201	2372	Srsf7-201;Srsf7-202;Srsf7-203;Srsf7-205;Srsf7-206;Srsf7-207;Srsf7-208;Srsf7-204;Ttc39d-202	Srsf7;Srsf7;Srsf7;Srsf7;Srsf7;Srsf7;Srsf7;Srsf7;Ttc39d	0;0;0;0;0;0;0;0;-2527	TRUE	FALSE	FALSE	FALSE	TRUE	TRUE	TRUE	FALSE	FALSE	threeUTR	7	8	225027	ENSMUSG00000024097	conserved gene and region
cg14877464	0.000854272	0.070642977	NA	NA	NA	NA	Ap3b1	Ap3b1_Intergenic_downstream	13	94596541	94596590	94596541	94596542	50	-	CGGAAGAGCGCTTCTCCAAATTGAAATATAGCAGAGTTTACACTCCTGAT	Distal Intergenic	13	94542303	94547867	5565	1	Ap3b1-202	54287	NA	NA	NA	FALSE	TRUE	FALSE	FALSE	FALSE	FALSE	FALSE	FALSE	TRUE	Intergenic_downstream	33	55	11774	ENSMUSG00000021686	mapped to different genes
cg14898663	-0.559715769	NA	NA	NA	NA	NA	Nlrp1c-ps	Nlrp1c-ps_Intergenic_upstream	11	71409452	71409501	71409500	71409501	50	+	AAGGTCACCCTGTTCTTGGAATCTTTTATTAATGCTGAAGACTGGCCCCG	Distal Intergenic	11	71242430	71285232	42803	2	Nlrp1c-ps-201	-124220	NA	NA	NA	FALSE	TRUE	FALSE	FALSE	FALSE	FALSE	FALSE	FALSE	TRUE	Intergenic_upstream	2	2	627984	ENSMUSG00000092528	mapped to different genes
cg14919009	0.46546617	NA	NA	NA	NA	NA	Rnf165	Rnf165_threeUTR	18	77458678	77458727	77458726	77458727	50	-	CATTTTTGTTTTTCTATCAGCTGAAATCGCTCTAGCATTTGCTCTACGCG	3' UTR	18	77456110	77565136	109027	2	Rnf165-201	106409	Rnf165-201;Rnf165-202;Rnf165-207	Rnf165;Rnf165;Rnf165	0;0;8421	TRUE	FALSE	FALSE	FALSE	TRUE	TRUE	FALSE	FALSE	FALSE	threeUTR	10	21	225743	ENSMUSG00000025427	conserved gene and region	18	77458705	77458805	101	*	101	9
cg14924324	0.221149946	NA	NA	NA	NA	NA	Pou2f2	Pou2f2_Intron	7	25134761	25134810	25134809	25134810	50	+	AAGGAGACGTAGGGGGCTCCCCAGGGCCAGCGGGGCTGGTAACTGACACG	Intron (Pou2f2-208/Pou2f2, intron 2 of 4)	7	25120618	25179726	59109	2	Pou2f2-208	44916	Pou2f2-203;Pou2f2-209;Pou2f2-201;Pou2f2-206;Pou2f2-204;Pou2f2-205;Pou2f2-202;Pou2f2-210;Pou2f2-208	Pou2f2;Pou2f2;Pou2f2;Pou2f2;Pou2f2;Pou2f2;Pou2f2;Pou2f2;Pou2f2	0;0;0;0;0;0;0;0;0	TRUE	FALSE	FALSE	FALSE	FALSE	FALSE	TRUE	FALSE	FALSE	Intron	11	29	18987	ENSMUSG00000008496	mapped to different genes	7	25134752	25134975	224	*	224	23
cg14940373	NA	-0.017471927	NA	NA	NA	NA	Hoxc11	Hoxc11_Promoter	15	102955356	102955405	102955404	102955405	50	-	TTTTATTATAACCTACAAAGCCCTCTCTCCCAACGACTCGACTTTTTACG	Promoter (<=1kb)	15	102954427	102957708	3282	1	Hoxc11-201	929	Hoxc11-201	Hoxc11	0	TRUE	FALSE	TRUE	FALSE	FALSE	FALSE	TRUE	FALSE	FALSE	Promoter	12	24	109663	ENSMUSG00000001656	mapped to different genes
cg14991487	NA	NA	NA	NA	1.462856492	NA	Hoxd9	Hoxd9_fiveUTR	2	74697885	74697934	74697933	74697934	50	-	CCCCAGTTTAGCGGACTGATTTACTCCCGGTATTGGTAAATATGATCACG	Promoter (<=1kb)	2	74697727	74700208	2482	1	Hoxd9-201	158	Hoxd10-201;Hoxd9-201	Hoxd10;Hoxd9	0;0	TRUE	FALSE	TRUE	TRUE	FALSE	TRUE	FALSE	FALSE	FALSE	fiveUTR	3	8	15438	ENSMUSG00000043342	mapped to different genes	2	74697896	74698814	919	*	919	110
cg15012446	NA	NA	NA	NA	-0.260420923	NA	Ctnna2	Ctnna2_Exon	6	77243850	77243899	77243898	77243899	50	+	GATCACAATCACATCTGCTCCGTGCAGGGGGACGCCTTTCAGAAACTGCG	Exon (Lrrtm1-201/Lrrtm1, exon 2 of 3)	6	76881637	77979699	1098063	2	Ctnna2-204	735800	Ctnna2-204;Ctnna2-205;Ctnna2-202;Ctnna2-201;Lrrtm1-201;Lrrtm1-202;Lrrtm1-203;Lrrtm1-204	Ctnna2;Ctnna2;Ctnna2;Ctnna2;Lrrtm1;Lrrtm1;Lrrtm1;Lrrtm1	0;0;0;0;0;0;0;0	TRUE	FALSE	FALSE	FALSE	FALSE	TRUE	TRUE	FALSE	FALSE	Exon	16	24	12386	ENSMUSG00000063063	conserved gene and region	6	77243660	77243918	259	*	259	23
cg15036140	-0.01288242	NA	NA	NA	NA	NA	Rab14	Rab14_fiveUTR	2	35200985	35201034	35200985	35200986	50	-	CGGCGCTCCCTGCACAGGGTTTCCTGTCACCCTCGCAATGGGCCGGACCA	Promoter (<=1kb)	2	35180205	35201120	20916	2	Rab14-201	86	Rab14-201;Rab14-202;Rab14-213;Rab14-211;Rab14-206;Rab14-207;Rab14-210;Rab14-203	Rab14;Rab14;Rab14;Rab14;Rab14;Rab14;Rab14;Rab14	0;0;0;-13;-196;-38;-3;-7	TRUE	FALSE	TRUE	TRUE	FALSE	TRUE	FALSE	FALSE	FALSE	fiveUTR	2	3	68365	ENSMUSG00000026878	conserved gene but different region	2	35200791	35201385	595	*	595	58
cg15051314	-0.04459917	NA	NA	NA	NA	NA	Upf1	Upf1_Exon	8	70335243	70335292	70335291	70335292	50	-	TTGGTGTGCAGGGAGCCGCTGAACTGCATGTACTGCACCAGGTAGGAGCG	Exon (Upf1-202/Upf1, exon 17 of 24)	8	70331525	70353211	21687	2	Upf1-202	17919	Cers1-203;Cers1-202;Gdf1-201;Upf1-202;Upf1-201	Cers1;Cers1;Gdf1;Upf1;Upf1	19468;19456;5426;0;0	TRUE	FALSE	FALSE	FALSE	FALSE	TRUE	FALSE	FALSE	FALSE	Exon	2	2	19704	ENSMUSG00000058301	conserved gene and region
cg15053735	NA	NA	NA	NA	0.167897317	NA	Zeb2	Zeb2_Intron	2	45038583	45038632	45038583	45038584	50	-	CGGGATAATTGATGTGTAGATTGCAGCATGAACAAATGCTTTGACTTGTT	Intron (Zeb2-212/Zeb2, intron 3 of 10)	2	44983632	45117395	133764	2	Zeb2-212	78763	Zeb2-212;Zeb2-213;Zeb2-201;Zeb2-202;Zeb2-215;Zeb2-214;Zeb2-203;Zeb2-221;Zeb2-220;Zeb2-216;Zeb2-218;Zeb2-222;Zeb2-208;Zeb2-228;Zeb2-226;Zeb2-209;Zeb2-224;Zeb2-207;Zeb2-219	Zeb2;Zeb2;Zeb2;Zeb2;Zeb2;Zeb2;Zeb2;Zeb2;Zeb2;Zeb2;Zeb2;Zeb2;Zeb2;Zeb2;Zeb2;Zeb2;Zeb2;Zeb2;Zeb2	0;0;0;0;0;0;0;0;0;0;0;0;0;0;0;0;0;0;0	TRUE	FALSE	FALSE	FALSE	FALSE	FALSE	TRUE	FALSE	FALSE	Intron	103	158	24136	ENSMUSG00000026872	conserved gene and region
cg15091495	NA	NA	NA	8.11E-05	NA	NA	Antxr2	Antxr2_Intron	5	97935163	97935212	97935211	97935212	50	-	AGACTTCGATCTGTACCTGCTGTCCCCTGTCACTCCCTGGAAACTTGGCG	Intron (Antxr2-201/Antxr2, intron 16 of 16)	5	97882783	98030962	148180	2	Antxr2-201	95750	Antxr2-201;Antxr2-202	Antxr2;Antxr2	0;0	TRUE	FALSE	FALSE	FALSE	FALSE	FALSE	TRUE	FALSE	FALSE	Intron	3	4	71914	ENSMUSG00000029338	conserved gene and region
cg15168457	0.529414447	NA	NA	NA	NA	NA	Atxn2	Atxn2_Exon	5	121781300	121781349	121781348	121781349	50	+	TTATACTTTCCTTCATATCATTTGTTCTGTCAGGTGTTCCCTGGCCATCG	Exon (Atxn2-201/Atxn2, exon 10 of 25)	5	121711609	121814950	103342	1	Atxn2-201	69691	Atxn2-201;Atxn2-220;Atxn2-209;Atxn2-208;Atxn2-219;Atxn2-214;Atxn2-202	Atxn2;Atxn2;Atxn2;Atxn2;Atxn2;Atxn2;Atxn2	0;0;0;0;0;0;-3725	TRUE	FALSE	FALSE	FALSE	FALSE	TRUE	TRUE	FALSE	FALSE	Exon	12	16	20239	ENSMUSG00000042605	conserved gene and region
cg15258337	-0.646883876	NA	NA	NA	NA	NA	Pknox1	Pknox1_fiveUTR	17	31564858	31564907	31564906	31564907	50	-	GCTTGTCAGTGTGATGAAGATTGGCACCCAGGTAAGCTGTCACTCAACCG	Promoter (<=1kb)	17	31564862	31605492	40631	1	Pknox1-202	0	Pknox1-201;Pknox1-206;Pknox1-212;Pknox1-209;Pknox1-202;Pknox1-208	Pknox1;Pknox1;Pknox1;Pknox1;Pknox1;Pknox1	0;0;0;0;0;0	TRUE	FALSE	TRUE	TRUE	FALSE	TRUE	TRUE	FALSE	FALSE	fiveUTR	8	8	18771	ENSMUSG00000006705	conserved gene but different region	17	31564906	31565621	716	*	716	118
cg15330117	-0.335676238	NA	NA	NA	NA	NA	Gata3	Gata3_fiveUTR	2	9878571	9878620	9878571	9878572	50	+	CGCCAGGCAGCTCAGTGTTCGCAGACAGCTGTGGCGCGACGCAACTTAAG	Promoter (<=1kb)	2	9857078	9878600	21523	2	Gata3-201	0	4930412O13Rik-201;4930412O13Rik-202;9230102O04Rik-202;9230102O04Rik-201;Gata3-201;Gata3-205;Gata3-206;Gata3-202;Gata3-204;Gata3-203	4930412O13Rik;4930412O13Rik;9230102O04Rik;9230102O04Rik;Gata3;Gata3;Gata3;Gata3;Gata3;Gata3	-2632;-4016;10920;5373;0;0;-3172;0;0;0	TRUE	FALSE	TRUE	TRUE	FALSE	TRUE	TRUE	FALSE	FALSE	fiveUTR	5	21	14462	ENSMUSG00000015619	conserved gene and region	2	9878568	9878714	147	*	147	12
cg15338129	-0.213846326	NA	NA	NA	NA	NA	Dcaf5	Dcaf5_Exon	12	80436283	80436332	80436283	80436284	50	-	CGCAGGCGTCTCCTCTGAAAGTCCTGAGTGAGCAGGGGGTCCCCATGCAA	Promoter (<=1kb)	12	80335848	80436601	100754	2	Dcaf5-201	269	Dcaf5-201;Dcaf5-202	Dcaf5;Dcaf5	0;0	TRUE	FALSE	TRUE	FALSE	FALSE	TRUE	TRUE	FALSE	FALSE	Exon	6	6	320808	ENSMUSG00000049106	conserved gene and region
cg15346475	NA	NA	NA	NA	NA	-0.094220279	Fads2	Fads2_Exon	19	10064715	10064764	10064715	10064716	50	-	CGGCTTCTCCTGGTATTCAATGCCATGCTTGGCACATAGAGACTTCACCA	Exon (Fads2-201/Fads2, exon 11 of 12)	19	10062765	10101746	38982	2	Fads2-201	36982	Fads2-201;Fads2-203;Fads2-202;Fads3-201	Fads2;Fads2;Fads2;Fads3	0;0;23952;23146	TRUE	FALSE	FALSE	FALSE	FALSE	TRUE	FALSE	FALSE	FALSE	Exon	1	1	56473	ENSMUSG00000024665	conserved gene and region
cg15378021	NA	NA	NA	NA	NA	0.886419847	Vipr1	Vipr1_Exon	9	121664622	121664671	121664670	121664671	50	+	CGTCTCCTTCTTCTCTGAGCGGAAGTACTTCTGGGGGTACATACTCATCG	Exon (Vipr1-201/Vipr1, exon 7 of 13)	9	121642716	121672954	30239	1	Vipr1-201	21906	Vipr1-201;Vipr1-203;Vipr1-202;Vipr1-204	Vipr1;Vipr1;Vipr1;Vipr1	0;21571;0;-4042	TRUE	FALSE	FALSE	FALSE	FALSE	TRUE	FALSE	FALSE	FALSE	Exon	2	2	22354	ENSMUSG00000032528	mapped to different genes
cg15426572	NA	NA	NA	-0.123924205	NA	NA	Fgf18	Fgf18_Promoter	11	33146292	33146341	33146292	33146293	50	-	CGAGTCTGAAAGCTGCTGAAGTAACAGATCAGATTTTAGCAAGTGCTTTC	Promoter (<=1kb)	11	33117430	33146795	29366	2	Fgf18-202	454	Fgf18-202;Fgf18-201	Fgf18;Fgf18	0;0	TRUE	FALSE	TRUE	FALSE	FALSE	FALSE	TRUE	FALSE	FALSE	Promoter	4	6	14172	ENSMUSG00000057967	conserved gene but different region
cg15463975	NA	NA	NA	NA	-1.281721877	-0.957141938	Six1	Six1_Intron	12	73041351	73041400	73041351	73041352	50	+	CGCAGCGTCCTTTGAAGCCTGTCAGGGTCATTGAAAGCTATCTTTGTGCA	Intron (Six1-204/Six1, intron 1 of 1)	12	73040015	73042815	2801	2	Six1-204	1415	Six1-204;Six1-201;Six1-203;Six1-202	Six1;Six1;Six1;Six1	0;0;0;3891	TRUE	FALSE	FALSE	FALSE	FALSE	FALSE	TRUE	FALSE	FALSE	Intron	10	18	20471	ENSMUSG00000051367	conserved gene but different region
cg15484756	NA	NA	NA	NA	-0.91091588	NA	Dnajc13	Dnajc13_Exon	9	104209311	104209360	104209359	104209360	50	-	TAGAAGAGATCCCAATTTGCTTCTATTTTTATTCTTTGTCTTCTCTTTCG	Exon (Dnajc13-201/Dnajc13, exon 21 of 56)	9	104151282	104262930	111649	2	Dnajc13-201	53570	Dnajc13-201;Dnajc13-203	Dnajc13;Dnajc13	0;0	TRUE	FALSE	FALSE	FALSE	FALSE	TRUE	FALSE	FALSE	FALSE	Exon	1	3	235567	ENSMUSG00000032560	conserved gene but different region
cg15503346	NA	0.323000729	NA	NA	NA	0.545375539	Gm6411	Gm6411_Intron	13	83732275	83732324	83732275	83732276	50	-	CGTAGTGTGGGGACTGAAAAAGACCGTGGCAATGGATGAACAATAGGGCT	Intron (C130071C03Rik-201/C130071C03Rik-201, intron 1 of 3)	13	83761132	83762335	1204	2	Gm6411-201	30060	NA	NA	NA	TRUE	FALSE	FALSE	FALSE	FALSE	FALSE	TRUE	FALSE	FALSE	Intron	26	36	623241	NA	mapped to different genes
cg15571405	NA	NA	-0.302433012	NA	NA	NA	Gm13835	Gm13835_Intron	6	31221702	31221751	31221750	31221751	50	+	TGCCTCACACCCACATATCTTGTTTTCCTAATTTGATTTCTGTATTTGCG	Intron (2210408F21Rik-208/2210408F21Rik-208, intron 1 of 5)	6	31141979	31142663	685	2	Gm13835-201	-79039	NA	NA	NA	TRUE	FALSE	FALSE	FALSE	FALSE	FALSE	TRUE	FALSE	FALSE	Intron	3	4	100038973	NA	mapped to different genes
cg15594409	NA	NA	NA	NA	-0.70414845	NA	Mylk	Mylk_Exon	16	34914961	34915010	34915009	34915010	50	-	TGAGGACGTGTTCACCCTGGTTCTAAAGAAGGTGCAGCCCTGGCATGCCG	Exon (Mylk-201/Mylk, exon 14 of 32)	16	34784921	35002420	217500	1	Mylk-201	130040	Mylk-201;Mylk-207;Mylk-208	Mylk;Mylk;Mylk	0;0;0	TRUE	FALSE	FALSE	FALSE	FALSE	TRUE	FALSE	FALSE	FALSE	Exon	6	7	107589	ENSMUSG00000022836	conserved gene but different region
cg15601638	-0.380079074	NA	NA	NA	NA	NA	Ehbp1	Ehbp1_Exon	11	22053401	22053450	22053449	22053450	50	-	AAACTGTTTACAGTGTAATTGGGCACCGTACCTGTGTCCATGAGATAGCG	Exon (Ehbp1-201/Ehbp1, exon 20 of 24)	11	22005828	22285838	280011	2	Ehbp1-201	232388	Ehbp1-201;Ehbp1-202;Ehbp1-207	Ehbp1;Ehbp1;Ehbp1	0;0;0	TRUE	FALSE	FALSE	FALSE	FALSE	TRUE	TRUE	FALSE	FALSE	Exon	11	45	216565	ENSMUSG00000042302	mapped to different genes
cg15608939	NA	NA	NA	NA	-0.129809285	NA	Ntn1	Ntn1_Intron	11	68399764	68399813	68399812	68399813	50	-	ACCTCTGTTCAGATTAGCCCGGGGGATGAATGCACCCATTATCCAGCCCG	Intron (Ntn1-202/Ntn1, intron 2 of 7)	11	68209364	68400823	191460	2	Ntn1-202	1010	Ntn1-202	Ntn1	0	TRUE	FALSE	FALSE	FALSE	FALSE	FALSE	TRUE	FALSE	FALSE	Intron	3	6	18208	ENSMUSG00000020902	conserved gene but different region	11	68399783	68400438	656	*	656	66
cg15631634	NA	NA	0.032043455	NA	NA	NA	E2f3	E2f3_Exon	13	29918758	29918807	29918758	29918759	50	-	CGTATCATACCGCGTTTTTTCTGAGGGAGATTTTGGAGCTTAAAGAAAAA	Exon (E2f3-203/E2f3, exon 3 of 7)	13	29906575	29984391	77817	2	E2f3-203	65584	E2f3-203;E2f3-204;E2f3-201;E2f3-202	E2f3;E2f3;E2f3;E2f3	0;0;0;0	TRUE	FALSE	FALSE	FALSE	FALSE	TRUE	TRUE	FALSE	FALSE	Exon	5	10	13557	ENSMUSG00000016477	conserved gene and region
cg15647529	NA	NA	NA	0.016157732	NA	NA	Rsrc1	Rsrc1_Intron	3	67232975	67233024	67232975	67232976	50	-	CGGCTTCTGCTGTGTTGCCTTGAAATTTATTATTCTGGAGATTTAAAGAA	Intron (Rsrc1-206/Rsrc1, intron 6 of 9)	3	66981390	67356559	375170	1	Rsrc1-206	251585	Rsrc1-206;Rsrc1-203;Rsrc1-202;Rsrc1-201;Rsrc1-209;Rsrc1-205	Rsrc1;Rsrc1;Rsrc1;Rsrc1;Rsrc1;Rsrc1	0;0;0;0;0;0	TRUE	FALSE	FALSE	FALSE	FALSE	FALSE	TRUE	FALSE	FALSE	Intron	31	37	66880	ENSMUSG00000034544	conserved gene and region
cg15701287	NA	-0.136925697	NA	NA	NA	NA	Myo18a	Myo18a_Intron	11	77858719	77858768	77858767	77858768	50	+	ACAATAGTCTAATTTACATGACATTCTCCATGAAGCTATTTTCACTGACG	Intron (Myo18a-208/Myo18a, intron 41 of 41)	11	77763246	77865980	102735	1	Myo18a-208	95473	Myo18a-208;Myo18a-209;Myo18a-207;Myo18a-201;Myo18a-203;Myo18a-222;Myo18a-223;Myo18a-211;Myo18a-205;Myo18a-210;Myo18a-224;Myo18a-202;Myo18a-220;Myo18a-221;Myo18a-215;Myo18a-216	Myo18a;Myo18a;Myo18a;Myo18a;Myo18a;Myo18a;Myo18a;Myo18a;Myo18a;Myo18a;Myo18a;Myo18a;Myo18a;Myo18a;Myo18a;Myo18a	0;0;0;0;0;0;0;0;0;0;0;0;0;0;0;0	TRUE	FALSE	FALSE	FALSE	FALSE	FALSE	TRUE	FALSE	FALSE	Intron	12	18	360013	ENSMUSG00000000631	conserved gene and region
cg15708373	-0.125754403	NA	NA	NA	NA	NA	Zbtb10	Zbtb10_Promoter	3	9249929	9249978	9249977	9249978	50	+	CTGGTGATGTAACACCCATGTCAATACTTCCCAGTGAACGCACGTGTTCG	Promoter (<=1kb)	3	9250602	9285333	34732	1	Zbtb10-201	-624	Zbtb10-201	Zbtb10	0	FALSE	TRUE	TRUE	FALSE	FALSE	FALSE	FALSE	FALSE	FALSE	Promoter	4	9	229055	ENSMUSG00000069114	conserved gene but different region
cg15710854	-0.218842144	NA	NA	NA	NA	NA	Rab3ip	Rab3ip_Promoter	10	116949397	116949446	116949445	116949446	50	+	AGGCCCCATAAAACTGGTGAAATATTTAACAGTATCAAATATTTACTACG	Promoter (<=1kb)	10	116905784	116950380	44597	2	Rab3ip-201	934	Rab3ip-201;Rab3ip-203;Rab3ip-205;Rab3ip-202	Rab3ip;Rab3ip;Rab3ip;Rab3ip	0;0;0;0	TRUE	FALSE	TRUE	FALSE	FALSE	FALSE	TRUE	FALSE	FALSE	Promoter	1	2	216363	ENSMUSG00000064181	conserved gene but different region
cg15713630	NA	NA	NA	NA	0.471780283	NA	Lmx1a	Lmx1a_Intron	1	167802943	167802992	167802991	167802992	50	+	AATTAGAGCCTCCCCTGAGTTCTAATGCCCAATCCTGAGTAAACAAGCCG	Intron (Lmx1a-202/Lmx1a, intron 4 of 8)	1	167689237	167848741	159505	1	Lmx1a-202	113706	Lmx1a-202;Lmx1a-201	Lmx1a;Lmx1a	0;0	TRUE	FALSE	FALSE	FALSE	FALSE	FALSE	TRUE	FALSE	FALSE	Intron	4	6	110648	ENSMUSG00000026686	conserved gene and region	1	167802691	167803010	320	*	320	17
cg15735715	NA	NA	NA	NA	-0.277213097	-0.57779811	Usp24	Usp24_Exon	4	106402033	106402082	106402081	106402082	50	-	ATTCCAGGTTCATCACTCATTAAACCATTGTTAGATGACTTCCTTTTCCG	Exon (Usp24-204/Usp24, exon 41 of 68)	4	106316213	106441317	125105	1	Usp24-204	85820	Usp24-204;Usp24-201	Usp24;Usp24	0;0	TRUE	FALSE	FALSE	FALSE	FALSE	TRUE	TRUE	FALSE	FALSE	Exon	3	5	329908	ENSMUSG00000028514	conserved gene and region
cg15756032	NA	NA	NA	NA	0.076994464	NA	Uroc1	Uroc1_Exon	6	90355271	90355320	90355319	90355320	50	-	CAGGTGGTGGGCTCCCAGGCAAGGATCCTGTACTCAGACCAGAAGGGCCG	Exon (Uroc1-201/Uroc1, exon 16 of 20)	6	90333284	90364551	31268	1	Uroc1-201	21987	Uroc1-201;Uroc1-202	Uroc1;Uroc1	0;0	TRUE	FALSE	FALSE	FALSE	FALSE	TRUE	TRUE	FALSE	FALSE	Exon	1	1	243537	ENSMUSG00000034456	conserved gene and region
cg15776582	NA	NA	NA	NA	-0.816424945	NA	Unc79	Unc79_fiveUTR	12	102949365	102949414	102949413	102949414	50	-	TCCGGGACCGAATTCTGCAATTTGATGTGCGTTTTGTCCGAATGGTAGCG	Promoter (<=1kb)	12	102948859	103184001	235143	1	Unc79-202	506	Unc79-202;Unc79-208	Unc79;Unc79	0;0	TRUE	FALSE	TRUE	TRUE	FALSE	TRUE	FALSE	FALSE	FALSE	fiveUTR	12	24	217843	ENSMUSG00000021198	conserved gene and region	12	102948810	102949512	703	*	703	59
cg15779017	NA	NA	NA	NA	-0.001909492	NA	Lmx1a	Lmx1a_Exon	1	167692001	167692050	167692049	167692050	50	+	TCTGTCTGCGAGGGCTGTCAGCGGGTCATCTTGGACAGGTTTCTGCTGCG	Exon (Lmx1a-202/Lmx1a, exon 3 of 9)	1	167689237	167848741	159505	1	Lmx1a-202	2764	Lmx1a-202;Lmx1a-201	Lmx1a;Lmx1a	0;0	TRUE	FALSE	FALSE	FALSE	FALSE	TRUE	FALSE	FALSE	FALSE	Exon	2	6	110648	ENSMUSG00000026686	conserved gene and region	1	167691914	167692082	169	*	169	11
cg15794906	NA	NA	NA	NA	-0.499860241	NA	Gm48316	Gm48316_Intergenic_upstream	13	94710276	94710325	94710324	94710325	50	+	AAACTGCAAATTATCCAGCAGCGGCCCTGTTCCCGTCTACCAGCAGCTCG	Distal Intergenic	13	94752270	94752593	324	1	Gm48316-201	-41945	NA	NA	NA	FALSE	TRUE	FALSE	FALSE	FALSE	FALSE	FALSE	FALSE	TRUE	Intergenic_upstream	36	42	NA	NA	mapped to different genes
cg15810551	NA	NA	NA	NA	-0.267234431	NA	Kiz	Kiz_Intron	2	146834475	146834524	146834523	146834524	50	+	ACAACAATATCAATTAATCATGCAGCGGGCAAACAAGGAGATTTATCCCG	Intron (Gm14114-201/Gm14114-201, intron 1 of 1)	2	146855864	146970097	114234	1	Kiz-201	-21340	NA	NA	NA	TRUE	FALSE	FALSE	FALSE	FALSE	FALSE	TRUE	FALSE	FALSE	Intron	17	29	228730	ENSMUSG00000074749	mapped to different genes	2	146834500	146834593	94	*	94	8
cg15836647	NA	NA	NA	NA	-1.296821145	NA	Ostm1	Ostm1_Intron	10	42632578	42632627	42632626	42632627	50	+	TTACAGGCACAGAATGGGCAATCCCTTGATCCCCGTCAATTGTCATCCCG	Intron (Ostm1-202/Ostm1, intron 2 of 5)	10	42583835	42698323	114489	1	Ostm1-202	48743	Ostm1-202;Ostm1-203	Ostm1;Ostm1	0;0	TRUE	FALSE	FALSE	FALSE	FALSE	FALSE	TRUE	FALSE	FALSE	Intron	21	22	14628	ENSMUSG00000038280	conserved gene and region	10	42632523	42632647	125	*	125	9
cg15889617	-0.057008173	NA	-0.199730203	NA	NA	NA	Dpf1	Dpf1_Exon	7	29309698	29309747	29309698	29309699	50	-	CGGAGACTCAACATCCTGGAGGACCCCAGACTCAGGCCCTGCGAGTACAA	Exon (Dpf1-204/Dpf1, exon 3 of 12)	7	29303951	29317264	13314	1	Dpf1-204	5747	Dpf1-204;Dpf1-201;Dpf1-203;Dpf1-208;Dpf1-202;Dpf1-210;Dpf1-207;Dpf1-205;Dpf1-209;Dpf1-206	Dpf1;Dpf1;Dpf1;Dpf1;Dpf1;Dpf1;Dpf1;Dpf1;Dpf1;Dpf1	0;0;0;0;0;0;0;0;0;0	TRUE	FALSE	FALSE	FALSE	FALSE	TRUE	FALSE	FALSE	FALSE	Exon	3	4	29861	ENSMUSG00000030584	conserved gene and region
cg15936060	-0.067672351	NA	NA	NA	NA	NA	Efcab11	Efcab11_Intron	12	99737438	99737487	99737486	99737487	50	+	CCATTATCTAGTTTCTCCTGCCTCCAGGCAGGGCCACATCATTGATTACG	Intron (Efcab11-205/Efcab11, intron 5 of 5)	12	99693045	99883423	190379	2	Efcab11-205	145936	Efcab11-205;Efcab11-201;Efcab11-207;Efcab11-202	Efcab11;Efcab11;Efcab11;Efcab11	0;0;0;0	TRUE	FALSE	FALSE	FALSE	FALSE	FALSE	TRUE	FALSE	FALSE	Intron	1	1	78767	ENSMUSG00000021176	mapped to different genes
cg15985773	NA	-0.02841432	NA	NA	NA	NA	Atad2b	Atad2b_Exon	12	5031501	5031550	5031501	5031502	50	-	CGGAGAAAATCAAGGCGGAGATCACAGTGGGGTAAAGGAATTATTAAGAA	Exon (Atad2b-201/Atad2b, exon 28 of 31)	12	4917404	5047394	129991	1	Atad2b-201	114097	Atad2b-201	Atad2b	0	TRUE	FALSE	FALSE	FALSE	FALSE	TRUE	FALSE	FALSE	FALSE	Exon	1	7	320817	ENSMUSG00000052812	conserved gene and region
cg16018837	-0.005590479	NA	NA	NA	NA	NA	Fam160a2	Fam160a2_threeUTR	7	105381392	105381441	105381392	105381393	50	-	CGCACACCTGCAGCAGGGACTTGACACTGGGCTGGAAGACCATGTTGGTG	3' UTR	7	105371211	105400054	28844	2	Fam160a2-208	18613	Fam160a2-208;Fam160a2-213;Fam160a2-206;Fam160a2-201;Fam160a2-203;Fam160a2-202;Fam160a2-204;Fam160a2-210;Fam160a2-207;Fam160a2-211;Fam160a2-212;Fam160a2-205;Gm5901-203;Gm5901-201;Gm5901-202	Fam160a2;Fam160a2;Fam160a2;Fam160a2;Fam160a2;Fam160a2;Fam160a2;Fam160a2;Fam160a2;Fam160a2;Fam160a2;Fam160a2;Gm5901;Gm5901;Gm5901	0;0;0;0;0;0;0;0;0;0;8073;7670;6354;6342;3569	TRUE	FALSE	FALSE	FALSE	TRUE	TRUE	TRUE	FALSE	FALSE	threeUTR	5	5	74349	ENSMUSG00000044465	conserved gene but different region
cg16023341	NA	0.241684272	NA	NA	NA	0.883333061	Cadps2	Cadps2_Intron	6	23273236	23273285	23273284	23273285	50	+	AATAGAAATTGACAAACCTCATCTCCTAAATAGTGCAGCTGAGCCGGGCG	Intron (Cadps2-213/Cadps2, intron 28 of 29)	6	23262773	23839137	576365	2	Cadps2-213	565852	Cadps2-213;Cadps2-205;Cadps2-212;Cadps2-201;Cadps2-209;Cadps2-206;Cadps2-211;Cadps2-207;Cadps2-202;Cadps2-210	Cadps2;Cadps2;Cadps2;Cadps2;Cadps2;Cadps2;Cadps2;Cadps2;Cadps2;Cadps2	0;0;0;0;0;0;0;0;0;0	TRUE	FALSE	FALSE	FALSE	FALSE	FALSE	TRUE	FALSE	FALSE	Intron	13	15	320405	ENSMUSG00000017978	conserved gene and region
cg16062897	-0.003645706	NA	NA	NA	NA	NA	Zfp536	Zfp536_Exon	7	37773104	37773153	37773152	37773153	50	-	CAGAGACTGAACCCTTGATATAATAATCTACAAAGAATGGTGTGTGATCG	Promoter (<=1kb)	7	37569629	37773641	204013	2	Zfp536-208	488	Zfp536-202;Zfp536-201;Zfp536-203;Zfp536-206;Zfp536-209;Zfp536-208;Zfp536-205;Zfp536-207;Zfp536-210	Zfp536;Zfp536;Zfp536;Zfp536;Zfp536;Zfp536;Zfp536;Zfp536;Zfp536	0;0;0;0;0;0;0;0;0	TRUE	FALSE	TRUE	FALSE	FALSE	TRUE	TRUE	FALSE	FALSE	Exon	13	112	243937	ENSMUSG00000043456	conserved gene but different region
cg16113298	0.412184362	NA	NA	NA	NA	NA	Pax6	Pax6_fiveUTR	2	105675534	105675583	105675582	105675583	50	-	TGGAGGATGATGACAGAGGTCAGGCTTCGCTAATGGGCCAGTGAGGAGCG	5' UTR	2	105668900	105697364	28465	1	Pax6-206	6634	Pax6-206;Pax6-207;Pax6-210;Pax6-214;Pax6-208;Pax6-217;Pax6-226;Pax6-220;Pax6-202;Pax6-205;Pax6-225;Pax6-204;Pax6-201;Pax6-203;Pax6-224;Pax6-219	Pax6;Pax6;Pax6;Pax6;Pax6;Pax6;Pax6;Pax6;Pax6;Pax6;Pax6;Pax6;Pax6;Pax6;Pax6;Pax6	0;0;0;0;0;0;0;0;0;0;0;0;0;0;0;0	TRUE	FALSE	FALSE	TRUE	FALSE	TRUE	TRUE	FALSE	FALSE	fiveUTR	15	78	18508	ENSMUSG00000027168	conserved gene and region
cg16159306	NA	NA	-0.15454767	NA	NA	NA	Zdhhc17	Zdhhc17_threeUTR	10	110962351	110962400	110962351	110962352	50	+	CGGTCCAGCTGAGCATCCCTTCCACTAGAGGGCCATGTGACACCTAAGGA	3' UTR	10	110941780	111010066	68287	2	Zdhhc17-201	47666	Zdhhc17-201;Zdhhc17-203;Zdhhc17-210;Zdhhc17-207;Zdhhc17-206;Zdhhc17-202	Zdhhc17;Zdhhc17;Zdhhc17;Zdhhc17;Zdhhc17;Zdhhc17	0;0;0;-1268;0;0	TRUE	FALSE	FALSE	FALSE	TRUE	TRUE	TRUE	FALSE	FALSE	threeUTR	2	4	320150	ENSMUSG00000035798	conserved gene and region
cg16171324	0.46056704	NA	NA	NA	NA	NA	Gm50479	Gm50479_Exon	8	26432207	26432256	26432207	26432208	50	-	CGAAGATAATTGTTTCATCCACTTTGTCAAAGCTGAAATGAAAAGAGGGC	Exon (Gm31898-201/Gm31898-201, exon 4 of 7)	8	26237222	26237407	186	1	Gm50479-201	195034	NA	NA	NA	TRUE	FALSE	FALSE	FALSE	FALSE	TRUE	TRUE	FALSE	FALSE	Exon	4	21	NA	NA	mapped to different genes
cg16184756	0.159110592	NA	NA	NA	NA	NA	Nkx2-1	Nkx2-1_Exon	12	56535316	56535365	56535316	56535317	50	-	CGCTAAAGCAACAAGACAATAGAAGCCTACATCTTGCCCGAGATAATTAG	Exon (Gm26973-202/Gm26973-202, exon 1 of 3)	12	56531958	56536908	4951	2	Nkx2-1-201	1543	Nkx2-1-202;Nkx2-1-201	Nkx2-1;Nkx2-1	0;0	TRUE	FALSE	FALSE	FALSE	FALSE	TRUE	TRUE	FALSE	FALSE	Exon	9	29	21869	ENSMUSG00000001496	mapped to different genes	12	56535178	56535355	178	*	178	14
cg16222297	-0.044246462	NA	NA	NA	NA	NA	Trpm4	Trpm4_threeUTR	7	45319289	45319338	45319289	45319290	50	-	CGCGGTTCCAAGCCACAGCCAAACGCAGCTCATCCAGGTAGGCTGAGGCC	3' UTR	7	45302632	45333768	31137	2	Trpm4-208	14430	Trpm4-208;Trpm4-201;Trpm4-209	Trpm4;Trpm4;Trpm4	0;0;0	TRUE	FALSE	FALSE	FALSE	TRUE	TRUE	FALSE	FALSE	FALSE	threeUTR	1	1	68667	ENSMUSG00000038260	conserved gene and region
cg16242634	0.022833036	NA	NA	NA	NA	NA	Herc1	Herc1_Exon	9	66418392	66418441	66418440	66418441	50	+	ACAGAAATCTTTCAGTGTTTCCTCTCAGCCCGTGAAGTAGCTCGTAGCCG	Exon (Herc1-201/Herc1, exon 23 of 78)	9	66350526	66508775	158250	1	Herc1-201	67866	Herc1-201	Herc1	0	TRUE	FALSE	FALSE	FALSE	FALSE	TRUE	TRUE	FALSE	FALSE	Exon	15	15	235439	ENSMUSG00000038664	conserved gene and region
cg16255876	NA	-0.001299071	NA	-0.135242388	NA	NA	Gm7382	Gm7382_Intergenic_upstream	15	40475820	40475869	40475820	40475821	50	+	CGCTGAAAACCTTTGAAACCACAAATGCTAACCTACCTGGCCTGCAGCCA	Distal Intergenic	15	40537321	40538425	1105	1	Gm7382-201	-61452	NA	NA	NA	FALSE	TRUE	FALSE	FALSE	FALSE	FALSE	FALSE	FALSE	TRUE	Intergenic_upstream	2	22	664872	NA	mapped to different genes
cg16257604	NA	NA	0.147788145	NA	NA	NA	Polr2a	Polr2a_Exon	11	69746376	69746425	69746376	69746377	50	-	CGCAGCTGATTGTTGATCTTCACGATGTCAGCCAGTTTGTGAGTCAGGTC	Exon (Polr2a-201/Polr2a, exon 6 of 29)	11	69733997	69758637	24641	2	Polr2a-201	12212	Polr2a-201;Polr2a-202;Polr2a-203	Polr2a;Polr2a;Polr2a	0;0;-3805	TRUE	FALSE	FALSE	FALSE	FALSE	TRUE	FALSE	FALSE	FALSE	Exon	1	1	20020	ENSMUSG00000005198	conserved gene and region
cg16335529	NA	NA	0.304660034	NA	NA	NA	Entpd7	Entpd7_Exon	19	43725491	43725540	43725491	43725492	50	+	CGCATTGGTGGCCGCTACCATGGGCCAACATTTGCCAAGGCTGCTCAGGT	Exon (Entpd7-201/Entpd7, exon 10 of 13)	19	43689672	43733697	44026	1	Entpd7-201	35819	Entpd7-201;Entpd7-204;Entpd7-202	Entpd7;Entpd7;Entpd7	0;35651;-827	TRUE	FALSE	FALSE	FALSE	FALSE	TRUE	TRUE	FALSE	FALSE	Exon	1	1	93685	ENSMUSG00000025192	mapped to different genes
cg16392817	NA	NA	0.175719877	NA	NA	NA	Gas1	Gas1_Intergenic_downstream	13	60133736	60133785	60133784	60133785	50	+	TTAACATATTTATGACCCCAGCTTTCTCTCTGTTCTCTGAGACTGTACCG	Distal Intergenic	13	60175787	60176941	1155	2	Gas1-202	43156	NA	NA	NA	FALSE	TRUE	FALSE	FALSE	FALSE	FALSE	FALSE	FALSE	TRUE	Intergenic_downstream	7	10	14451	ENSMUSG00000052957	conserved gene and region
cg16435898	NA	NA	NA	NA	-0.058974071	0.027536314	Foxg1	Foxg1_Exon	12	49385191	49385240	49385191	49385192	50	-	CGCCACTACGACGACCCGGGCAAGGGCAACTACTGGATGCTGGACCCGTC	Exon (Foxg1-204/Foxg1, exon 1 of 1)	12	49382883	49386855	3973	1	Foxg1-204	2308	Foxg1-202;Foxg1-203;Foxg1-204;Foxg1-201;Gm43517-201	Foxg1;Foxg1;Foxg1;Foxg1;Gm43517	0;2391;0;0;0	TRUE	FALSE	FALSE	FALSE	FALSE	TRUE	FALSE	FALSE	FALSE	Exon	8	27	15228	ENSMUSG00000020950	conserved gene and region	12	49385116	49385808	693	*	693	72
cg16448606	NA	NA	NA	NA	-0.056949889	-0.153093422	Trps1	Trps1_Intron	15	50698233	50698282	50698233	50698234	50	+	CGTGCTCAGAAGTGTTGAAAGAAAGGCCCATTCTCTGCCCAGGGAATTGC	Intron (Trps1-202/Trps1, intron 4 of 5)	15	50654752	50889691	234940	2	Trps1-202	191409	Trps1-202;Trps1-206;Trps1-204;Trps1-205;Trps1-207;Trps1-201	Trps1;Trps1;Trps1;Trps1;Trps1;Trps1	0;0;0;0;0;0	TRUE	FALSE	FALSE	FALSE	FALSE	FALSE	TRUE	FALSE	FALSE	Intron	12	36	83925	ENSMUSG00000038679	conserved gene and region
cg16477041	NA	NA	NA	NA	-0.387573789	NA	Gm12684	Gm12684_Intergenic_upstream	4	99444842	99444891	99444890	99444891	50	-	ATTATAATGCATGGATATAACTTATAACATGAATCAATGTCATCAAGACG	Distal Intergenic	4	99430256	99431254	999	2	Gm12684-201	-13637	NA	NA	NA	FALSE	TRUE	FALSE	FALSE	FALSE	FALSE	FALSE	FALSE	TRUE	Intergenic_upstream	8	8	665212	NA	mapped to different genes
cg16555117	-0.15290047	NA	NA	NA	NA	NA	Vegfa	Vegfa_Exon	17	46021035	46021084	46021035	46021036	50	-	CGAGTCTGTGTTTTTGCAGGAACATTTACACGTCTGCGGATCTTGTACAA	Exon (Vegfa-202/Vegfa, exon 6 of 7)	17	46016993	46031815	14823	2	Vegfa-201	10731	Vegfa-201;Vegfa-202;Vegfa-210;Vegfa-207;Vegfa-205;Vegfa-208;Vegfa-204;Vegfa-206;Vegfa-203;Vegfa-209	Vegfa;Vegfa;Vegfa;Vegfa;Vegfa;Vegfa;Vegfa;Vegfa;Vegfa;Vegfa	0;0;0;0;0;0;0;0;0;10272	TRUE	FALSE	FALSE	FALSE	FALSE	TRUE	TRUE	FALSE	FALSE	Exon	5	7	22339	ENSMUSG00000023951	conserved gene and region
cg16561874	NA	NA	NA	NA	0.080201455	NA	Unc79	Unc79_fiveUTR	12	102949355	102949404	102949403	102949404	50	-	TTCCTAACCTTCCGGGACCGAATTCTGCAATTTGATGTGCGTTTTGTCCG	Promoter (<=1kb)	12	102948859	103184001	235143	1	Unc79-202	496	Unc79-202;Unc79-208	Unc79;Unc79	0;0	TRUE	FALSE	TRUE	TRUE	FALSE	TRUE	FALSE	FALSE	FALSE	fiveUTR	12	24	217843	ENSMUSG00000021198	conserved gene and region	12	102948810	102949512	703	*	703	59
cg16588616	NA	NA	NA	NA	0.494845494	NA	Sp8	Sp8_Promoter	12	118840924	118840973	118840972	118840973	50	-	GGCCGAAATAACGTGGCCATTATGGCCTGAAATGGGCCAGGTTTGAAGCG	Promoter (5-6kb)	12	118846329	118852576	6248	1	Sp8-201	-5405	NA	NA	NA	FALSE	TRUE	TRUE	FALSE	FALSE	FALSE	FALSE	FALSE	FALSE	Promoter	27	29	320145	ENSMUSG00000048562	conserved gene and region	12	118840863	118841021	159	*	159	10
cg16595936	0.191799052	NA	NA	NA	NA	NA	Lbx1	Lbx1_Intergenic_downstream	19	45229271	45229320	45229319	45229320	50	+	CCAGCTCGTCCCTTTCAGGGGGGACTCATGCATCAAACTTCAATTTTCCG	Distal Intergenic	19	45232684	45235812	3129	2	Lbx1-201	6492	Lbx1-201	Lbx1	0	FALSE	TRUE	FALSE	FALSE	FALSE	FALSE	FALSE	FALSE	TRUE	Intergenic_downstream	30	50	16814	ENSMUSG00000025216	mapped to different genes
cg16625559	0.283140712	NA	NA	NA	NA	NA	Dcdc5	Dcdc5_Intron	2	106133378	106133427	106133378	106133379	50	+	CGATTGCTGGGGCCACAGTGTTGGTACTCTTATTTTGCTGTGCCACCTTT	Intron (Dcdc5-203/Dcdc5, intron 8 of 8)	2	106003336	106157718	154383	1	Dcdc5-203	130042	Dcdc5-203;Dcdc5-202	Dcdc5;Dcdc5	0;0	TRUE	FALSE	FALSE	FALSE	FALSE	FALSE	TRUE	FALSE	FALSE	Intron	20	22	329482	ENSMUSG00000074981	mapped to different genes
cg16658949	NA	NA	NA	NA	0.269962291	NA	Auts2	Auts2_Intergenic_upstream	5	132859017	132859066	132859065	132859066	50	+	GAACTCTGTTGCCTAGCAACCAATGGAACATTACAACACTAGATAAATCG	Distal Intergenic	5	131437333	132543344	1106012	2	Auts2-207	-315673	NA	NA	NA	FALSE	TRUE	FALSE	FALSE	FALSE	FALSE	FALSE	FALSE	TRUE	Intergenic_upstream	1	1	319974	ENSMUSG00000029673	mapped to different genes
cg16677609	NA	NA	0.191024197	NA	NA	NA	Gm47909	Gm47909_Intergenic_upstream	14	25109060	25109109	25109060	25109061	50	+	CGACCTTTGGGGCCTGGTGGTTGTTAATGCATGAGTGACTGCCTGCATTG	Distal Intergenic	14	25089939	25090406	468	2	Gm47909-201	-18654	NA	NA	NA	FALSE	TRUE	FALSE	FALSE	FALSE	FALSE	FALSE	FALSE	TRUE	Intergenic_upstream	4	17	NA	NA	mapped to different genes
cg16691593	NA	NA	0.409958478	NA	0.638721193	NA	Otp	Otp_Promoter	13	94875509	94875558	94875509	94875510	50	-	CGCTGACATTTGCAGGCTGCCCTCCTGATTGGTCCCCTCGCCGAGCTGCT	Promoter (<=1kb)	13	94875602	94885130	9529	1	Otp-201	-93	Otp-201	Otp	0	FALSE	TRUE	TRUE	FALSE	FALSE	FALSE	FALSE	FALSE	FALSE	Promoter	27	34	18420	ENSMUSG00000021685	conserved gene but different region	13	94875299	94875591	293	*	293	22
cg16709039	NA	NA	NA	NA	-0.944630228	NA	Maml3	Maml3_Intron	3	51701692	51701741	51701692	51701693	50	+	CGGCGTGATGGACATCACACACGACAGCCTGAGACAATCCAGGAATTCCC	Intron (Maml3-201/Maml3, intron 1 of 3)	3	51685907	51796536	110630	2	Maml3-201	94795	Maml3-201;Maml3-202	Maml3;Maml3	0;0	TRUE	FALSE	FALSE	FALSE	FALSE	FALSE	TRUE	FALSE	FALSE	Intron	10	32	433586	ENSMUSG00000061143	mapped to different genes	3	51701433	51701790	358	*	358	25
cg16762797	0.403512631	0.152966424	0.532297256	NA	NA	NA	Dmpk	Dmpk_Exon	7	19092214	19092263	19092214	19092215	50	+	CGGGGGTCCCCAGTCCCCGGGCCACGGATCCACCTTCCCATGTAAGACCC	Promoter (<=1kb)	7	19092218	19093771	1554	1	Dmpk-205	0	Dmpk-201;Dmpk-218;Dmpk-202;Dmpk-203;Dmpk-219;Dmpk-216;Dmpk-208;Dmpk-209;Dmpk-211;Dmpk-213;Dmpk-217;Dmpk-206;Dmpk-215;Dmpk-207;Dmpk-212;Dmpk-214;Dmpk-205;Dmpk-210;Six5-201	Dmpk;Dmpk;Dmpk;Dmpk;Dmpk;Dmpk;Dmpk;Dmpk;Dmpk;Dmpk;Dmpk;Dmpk;Dmpk;Dmpk;Dmpk;Dmpk;Dmpk;Dmpk;Six5	0;0;0;0;0;7504;0;0;0;4945;4721;4603;4468;0;0;0;0;0;0	TRUE	FALSE	TRUE	FALSE	FALSE	TRUE	TRUE	FALSE	FALSE	Exon	1	2	13400	ENSMUSG00000030409	mapped to different genes
cg16787246	NA	NA	NA	NA	-0.184094452	-0.375223174	Usp24	Usp24_Exon	4	106402124	106402173	106402172	106402173	50	-	GTGCCGCCATCAGTCAACAGGACTTTCATCCAAAGTATGGAAAATGCACG	Exon (Usp24-204/Usp24, exon 41 of 68)	4	106316213	106441317	125105	1	Usp24-204	85911	Usp24-204;Usp24-201	Usp24;Usp24	0;0	TRUE	FALSE	FALSE	FALSE	FALSE	TRUE	TRUE	FALSE	FALSE	Exon	3	5	329908	ENSMUSG00000028514	conserved gene but different region
cg16820522	NA	NA	NA	-0.239875405	NA	NA	Gm2089	Gm2089_Intergenic_downstream	12	47317204	47317253	47317252	47317253	50	+	CAGCTCTCTGAAACAAAACAAAAACAAAATGTACCCAGGTTTCAGTTACG	Distal Intergenic	12	47199991	47200469	479	1	Gm2089-201	117213	NA	NA	NA	FALSE	TRUE	FALSE	FALSE	FALSE	FALSE	FALSE	FALSE	TRUE	Intergenic_downstream	2	2	100039190	NA	mapped to different genes
cg16853731	NA	NA	NA	NA	-0.654715979	NA	Pou3f1	Pou3f1_threeUTR	4	124659641	124659690	124659689	124659690	50	-	TTTTTATTTATTCGTGGAGCCTCTCGGCTCCTGGGGTCCTTCTAACTCCG	3' UTR	4	124656807	124660655	3849	1	Pou3f1-201	2834	Pou3f1-201	Pou3f1	0	TRUE	FALSE	FALSE	FALSE	TRUE	TRUE	FALSE	FALSE	FALSE	threeUTR	6	85	18991	ENSMUSG00000090125	conserved gene and region	4	124659224	124659760	537	*	537	47
cg16861303	NA	NA	NA	NA	NA	0.190760501	Nr2f2	Nr2f2_Exon	7	70357754	70357803	70357802	70357803	50	-	CCTTCCTACCTGAGGTGAACAGGACTATGGCCTTGAGGCAGCTGTACTCG	Exon (Nr2f2-201/Nr2f2, exon 2 of 3)	7	70351944	70360593	8650	2	Nr2f2-201	2790	Nr2f2-201;Nr2f2-203;Nr2f2-202;Nr2f2-205;Nr2f2-204;Nr2f2-206	Nr2f2;Nr2f2;Nr2f2;Nr2f2;Nr2f2;Nr2f2	0;0;0;0;0;0	TRUE	FALSE	FALSE	FALSE	FALSE	TRUE	TRUE	FALSE	FALSE	Exon	24	69	11819	ENSMUSG00000030551	conserved gene and region
cg16862391	NA	NA	0.009099317	NA	NA	NA	Stard8	Stard8_Exon	X	99073087	99073136	99073087	99073088	50	+	CGTTCTCCTGACTGGTACAACAAAGTCTTTGGACACCTGTGTGCCATGGA	Exon (Stard8-201/Stard8, exon 14 of 14)	20	99042581	99074728	32148	1	Stard8-201	30506	Stard8-201;Stard8-202	Stard8;Stard8	0;4479	TRUE	FALSE	FALSE	FALSE	FALSE	TRUE	FALSE	FALSE	FALSE	Exon	2	2	236920	ENSMUSG00000031216	conserved gene but different region
cg16886347	NA	NA	NA	NA	0.028866938	NA	Ephb2	Ephb2_Intron	4	136773215	136773264	136773263	136773264	50	+	CACTTAATTAGAGCACTCTGCCTTTCTCCCCTCTCTCTAATTAACATGCG	Intron (Ephb2-202/Ephb2, intron 2 of 15)	4	136647539	136835988	188450	2	Ephb2-202	62724	Ephb2-202;Ephb2-201;Ephb2-203;Ephb2-204	Ephb2;Ephb2;Ephb2;Ephb2	0;0;0;0	TRUE	FALSE	FALSE	FALSE	FALSE	FALSE	TRUE	FALSE	FALSE	Intron	8	15	13844	ENSMUSG00000028664	conserved gene and region
cg16907409	NA	NA	NA	NA	-0.371256564	-1.739738317	Thra	Thra_Exon	11	98756130	98756179	98756130	98756131	50	+	CGAAAAAGAAAGAACGGCCAATGTTCCCTGAAAACCAGCATGTCAGGTGA	Exon (Thra-207/Thra, exon 3 of 4)	11	98741811	98757695	15885	1	Thra-207	14319	Thra-205;Thra-209;Thra-204;Thra-207;Thra-201;Thra-202;Thra-208;Thra-206;Thra-203	Thra;Thra;Thra;Thra;Thra;Thra;Thra;Thra;Thra	15492;0;15226;0;0;0;0;0;0	TRUE	FALSE	FALSE	FALSE	FALSE	TRUE	TRUE	FALSE	FALSE	Exon	13	18	21833	ENSMUSG00000058756	conserved gene and region
cg16949290	NA	NA	NA	NA	1.965752616	NA	Bcl11b	Bcl11b_Promoter	12	108004053	108004102	108004053	108004054	50	-	CGGTCTCTCTATGGCTGGGGCTGCCTCTGTACAATGGGATAAAATTCAAG	Promoter (<=1kb)	12	107910403	108003602	93200	2	Bcl11b-201	-500	Bcl11b-201;Bcl11b-202;Bcl11b-203	Bcl11b;Bcl11b;Bcl11b	0;0;0	FALSE	TRUE	TRUE	FALSE	FALSE	FALSE	FALSE	FALSE	FALSE	Promoter	8	39	58208	ENSMUSG00000048251	conserved gene but different region	12	108003757	108004054	298	*	298	35
cg16951263	NA	NA	-0.313353997	NA	NA	NA	Nr2f2	Nr2f2_Intergenic_downstream	7	70351729	70351778	70351777	70351778	50	+	AATGCAATAAACTTAAACCGAACTCAAGACTCTAAACAGATCCTCCTCCG	Downstream (<1kb)	7	70353074	70355237	2164	2	Nr2f2-203	3459	Nr2f2-201;Nr2f2-203;Nr2f2-202;Nr2f2-205	Nr2f2;Nr2f2;Nr2f2;Nr2f2	0;0;0;0	FALSE	TRUE	FALSE	FALSE	FALSE	FALSE	FALSE	FALSE	FALSE	Intergenic_downstream	19	69	11819	ENSMUSG00000030551	mapped to different genes
cg16957078	NA	NA	NA	NA	-0.323837452	-1.104502607	Ldb3	Ldb3_Exon	14	34561834	34561883	34561834	34561835	50	+	CGCAATTTGGCAAAACGTGGGCTGTTACGTTCCGTTTCAAACCTTTCCCT	Exon (Ldb3-207/Ldb3, exon 10 of 10)	14	34526603	34588664	62062	2	Ldb3-201	26781	Ldb3-201;Ldb3-205;Ldb3-202;Ldb3-204;Ldb3-208;Ldb3-207;Ldb3-203	Ldb3;Ldb3;Ldb3;Ldb3;Ldb3;Ldb3;Ldb3	0;0;0;0;0;0;0	TRUE	FALSE	FALSE	FALSE	FALSE	TRUE	TRUE	FALSE	FALSE	Exon	5	5	24131	ENSMUSG00000021798	conserved gene but different region
cg16960148	NA	NA	-0.032629923	NA	NA	NA	Mbnl1	Mbnl1_fiveUTR	3	60528735	60528784	60528783	60528784	50	+	ACCTATCTCTTTTTTCTACAGGTTGGTACTAAGAAGTGCCTTTCCTGACG	5' UTR	3	60472830	60595764	122935	1	Mbnl1-222	55905	Mbnl1-222;Mbnl1-221;Mbnl1-216;Mbnl1-220;Mbnl1-211;Mbnl1-204;Mbnl1-201;Mbnl1-209;Mbnl1-202;Mbnl1-225;Mbnl1-217;Mbnl1-203;Mbnl1-218;Mbnl1-208;Mbnl1-219;Mbnl1-214;Mbnl1-207;Mbnl1-205;Mbnl1-212	Mbnl1;Mbnl1;Mbnl1;Mbnl1;Mbnl1;Mbnl1;Mbnl1;Mbnl1;Mbnl1;Mbnl1;Mbnl1;Mbnl1;Mbnl1;Mbnl1;Mbnl1;Mbnl1;Mbnl1;Mbnl1;Mbnl1	0;0;0;0;0;0;0;0;0;0;0;0;0;0;0;0;0;0;0	TRUE	FALSE	FALSE	TRUE	FALSE	TRUE	TRUE	FALSE	FALSE	fiveUTR	3	36	56758	ENSMUSG00000027763	conserved gene and region
cg16976603	-0.750854612	NA	NA	NA	NA	NA	Arrdc3	Arrdc3_Exon	13	80884866	80884915	80884866	80884867	50	+	CGCGTCAGGTGGTGGCGATGACTTAATTCCTAGCCCAAGAAGAATATAAT	Exon (1700023H06Rik-201/1700023H06Rik-201, exon 2 of 2)	13	80883384	80889643	6260	1	Arrdc3-202	1482	Arrdc3-202;Arrdc3-203;Arrdc3-201;Arrdc3-205	Arrdc3;Arrdc3;Arrdc3;Arrdc3	0;0;0;0	TRUE	FALSE	FALSE	FALSE	FALSE	TRUE	TRUE	FALSE	FALSE	Exon	7	8	105171	ENSMUSG00000074794	mapped to different genes
cg16986847	-0.19792653	NA	NA	NA	NA	NA	Tcf7	Tcf7_Intron	11	52255104	52255153	52255104	52255105	50	-	CGGACCACACCAATCCGTCTGCTGGTTGAGGCCAAAGCGAGCACGGCATT	Intron (Tcf7-201/Tcf7, intron 9 of 9)	11	52252371	52282571	30201	2	Tcf7-201	27418	Tcf7-201;Tcf7-202;Tcf7-203	Tcf7;Tcf7;Tcf7	0;0;0	TRUE	FALSE	FALSE	FALSE	FALSE	FALSE	TRUE	FALSE	FALSE	Intron	2	8	21414	ENSMUSG00000000782	conserved gene but different region
cg17036647	NA	NA	NA	NA	-0.036212126	NA	Sim1	Sim1_Intron	10	50901922	50901971	50901970	50901971	50	+	TTTCTTGTTTTATAAATCGAAATCTCATTTTCAGGAAATTACAAAACCCG	Intron (Sim1-201/Sim1, intron 1 of 10)	10	50895651	50989152	93502	1	Sim1-201	6271	Sim1-202;Sim1-201	Sim1;Sim1	0;0	TRUE	FALSE	FALSE	FALSE	FALSE	FALSE	TRUE	FALSE	FALSE	Intron	7	8	20464	ENSMUSG00000019913	conserved gene and region
cg17063148	NA	NA	NA	NA	-1.011935473	NA	Prrxl1	Prrxl1_Promoter	14	32599310	32599359	32599310	32599311	50	+	CGCTGTAGACAGCGCTGGAAATAATCAGATTAAGGCCAATTATGCGTGAG	Promoter (<=1kb)	14	32599407	32649204	49798	1	Prrxl1-203	-48	Prrxl1-203;Prrxl1-204;Prrxl1-202;Prrxl1-201;Prrxl1-205	Prrxl1;Prrxl1;Prrxl1;Prrxl1;Prrxl1	0;0;0;0;0	FALSE	TRUE	TRUE	FALSE	FALSE	FALSE	FALSE	FALSE	FALSE	Promoter	14	23	107751	ENSMUSG00000041730	conserved gene and region	14	32599310	32599392	83	*	83	9
cg17095500	NA	0.280600152	NA	NA	NA	NA	Nrxn3	Nrxn3_threeUTR	12	90331788	90331837	90331836	90331837	50	+	ATAAGAGTCTTTCCACTTCAATCTTCGAAGGTGGCTACAAAGCACATGCG	3' UTR	12	88722986	90332878	1609893	1	Nrxn3-213	1608802	Nrxn3-213;Nrxn3-208;Nrxn3-205;Nrxn3-201;Nrxn3-210;Nrxn3-214;Nrxn3-203;Nrxn3-202	Nrxn3;Nrxn3;Nrxn3;Nrxn3;Nrxn3;Nrxn3;Nrxn3;Nrxn3	0;0;0;0;0;0;0;0	TRUE	FALSE	FALSE	FALSE	TRUE	TRUE	TRUE	FALSE	FALSE	threeUTR	14	39	18191	ENSMUSG00000066392	conserved gene and region
cg17177455	NA	NA	NA	NA	-0.709604423	NA	Hoxd11	Hoxd11_Exon	2	74679625	74679674	74679673	74679674	50	+	CAAAGTTAAGGTCAAGTTAGTGTCTTATCTTGGGTGACTCAAAATCACCG	Promoter (<=1kb)	2	74679557	74687016	7460	1	Hoxd11-201	68	Hoxd11-201;Hoxd11-202;Hoxd12-201	Hoxd11;Hoxd11;Hoxd12	0;0;0	TRUE	FALSE	TRUE	FALSE	FALSE	TRUE	FALSE	FALSE	FALSE	Exon	8	14	15431	ENSMUSG00000042499	conserved gene and region	2	74679673	74679866	194	*	194	20
cg17179896	NA	NA	0.099054052	NA	NA	NA	Srrm2	Srrm2_fiveUTR	17	23808098	23808147	23808098	23808099	50	-	CGACCTTTCGACTCATGTTGCTGGAGAAGGATGTGAACCCTGGGGGCAAG	Promoter (<=1kb)	17	23808098	23808708	611	1	Srrm2-208	0	Srrm2-206;Srrm2-210;Srrm2-201;Srrm2-212;Srrm2-211;Srrm2-208;Srrm2-203;Srrm2-207	Srrm2;Srrm2;Srrm2;Srrm2;Srrm2;Srrm2;Srrm2;Srrm2	0;0;0;0;0;0;0;-3753	TRUE	FALSE	TRUE	TRUE	FALSE	TRUE	FALSE	FALSE	FALSE	fiveUTR	2	13	75956	ENSMUSG00000039218	conserved gene and region
cg17185663	-0.246360106	NA	NA	NA	NA	NA	Rnf44	Rnf44_Exon	13	54687213	54687262	54687261	54687262	50	+	CCGGACCATGTGCTCGGCGTGAGACAAAAGCAACAACAAAGGAAGTGGCG	Promoter (<=1kb)	13	54684030	54687253	3224	2	Rnf44-203	0	Rnf44-218;Rnf44-204;Rnf44-201;Rnf44-211;Rnf44-217;Rnf44-208;Rnf44-213;Rnf44-206;Rnf44-209;Rnf44-207;Rnf44-205;Rnf44-202;Rnf44-210;Rnf44-214;Rnf44-215;Rnf44-203;Rnf44-212;Rnf44-216	Rnf44;Rnf44;Rnf44;Rnf44;Rnf44;Rnf44;Rnf44;Rnf44;Rnf44;Rnf44;Rnf44;Rnf44;Rnf44;Rnf44;Rnf44;Rnf44;Rnf44;Rnf44	0;0;0;0;0;0;0;0;0;0;0;0;0;0;0;0;0;0	TRUE	FALSE	TRUE	FALSE	FALSE	TRUE	TRUE	FALSE	FALSE	Exon	1	3	105239	ENSMUSG00000034928	conserved gene but different region	13	54687075	54688213	1139	*	1139	123
cg17224602	NA	NA	NA	NA	-0.965731546	NA	Pou3f3	Pou3f3_Promoter	1	42695584	42695633	42695584	42695585	50	-	CGCTCTGCCTAAATTAAAAAGCAACCAATCGGAACGGCCGGAAGGGGGGC	Promoter (<=1kb)	1	42694925	42703176	8252	1	Pou3f3-202	659	Pou3f3-202;Pou3f3-201	Pou3f3;Pou3f3	0;0	TRUE	FALSE	TRUE	FALSE	FALSE	FALSE	TRUE	FALSE	FALSE	Promoter	3	37	18993	ENSMUSG00000045515	conserved gene and region	1	42695391	42695839	449	*	449	33
cg17228011	NA	NA	NA	-0.38742924	NA	NA	Ppp2r5e	Ppp2r5e_Exon	12	75593270	75593319	75593270	75593271	50	+	CGAGAAAATCCGTCTACTTTATCCACTGATGGAGGAGTAGTTGGTGCTGA	Exon (Ppp2r5e-201/Ppp2r5e, exon 2 of 14)	12	75450881	75596200	145320	2	Ppp2r5e-201	2881	Ppp2r5e-201;Ppp2r5e-205;Ppp2r5e-202;Ppp2r5e-204	Ppp2r5e;Ppp2r5e;Ppp2r5e;Ppp2r5e	0;0;0;0	TRUE	FALSE	FALSE	FALSE	FALSE	TRUE	FALSE	FALSE	FALSE	Exon	3	7	26932	ENSMUSG00000021051	conserved gene and region
cg17295628	0.32070624	NA	0.407344517	NA	NA	NA	Casz1	Casz1_Intron	4	148893534	148893583	148893582	148893583	50	+	TTGTCACCCTAATTGATTGCATTAACCTTTCAGCGTATTGGATTTCCCCG	Intron (Casz1-201/Casz1, intron 3 of 15)	4	148804429	148945129	140701	1	Casz1-201	89105	Casz1-201;Casz1-202;Casz1-205	Casz1;Casz1;Casz1	0;0;4153	TRUE	FALSE	FALSE	FALSE	FALSE	FALSE	TRUE	FALSE	FALSE	Intron	94	124	69743	ENSMUSG00000028977	mapped to different genes
cg17314086	NA	NA	NA	0.03999655	NA	NA	Eri3	Eri3_Intron	4	117645112	117645161	117645160	117645161	50	+	ATTATACACGATTCCATTTCGCGGGCCCAGCAATGTAATTTCACAGGGCG	Intron (Eri3-201/Eri3, intron 7 of 8)	4	117550365	117674297	123933	1	Eri3-201	94747	Eri3-201;Eri3-206;Eri3-203	Eri3;Eri3;Eri3	0;0;0	TRUE	FALSE	FALSE	FALSE	FALSE	FALSE	TRUE	FALSE	FALSE	Intron	82	97	140546	ENSMUSG00000033423	conserved gene and region
cg17325863	0.215403806	NA	NA	NA	NA	NA	Tcf4	Tcf4_Intron	18	69346902	69346951	69346950	69346951	50	+	TTCATTTCTCGCTCTACCTCCTGTTGCATAAAATGATGCGCTGAAGAGCG	Intron (Tcf4-259/Tcf4, intron 1 of 6)	18	69343356	69564082	220727	1	Tcf4-259	3546	Tcf4-259;Tcf4-201;Tcf4-207;Tcf4-210;Tcf4-240;Tcf4-254;Tcf4-246;Tcf4-206;Tcf4-202;Tcf4-257;Tcf4-232;Tcf4-215;Tcf4-248;Tcf4-231;Tcf4-205;Tcf4-253;Tcf4-244;Tcf4-233;Tcf4-238;Tcf4-245;Tcf4-249;Tcf4-219;Tcf4-235;Tcf4-227	Tcf4;Tcf4;Tcf4;Tcf4;Tcf4;Tcf4;Tcf4;Tcf4;Tcf4;Tcf4;Tcf4;Tcf4;Tcf4;Tcf4;Tcf4;Tcf4;Tcf4;Tcf4;Tcf4;Tcf4;Tcf4;Tcf4;Tcf4;Tcf4	0;0;0;0;0;0;0;0;0;0;0;0;0;0;0;0;0;0;0;0;0;0;0;0	TRUE	FALSE	FALSE	FALSE	FALSE	FALSE	TRUE	FALSE	FALSE	Intron	42	66	21413	ENSMUSG00000053477	conserved gene but different region
cg17341782	0.234338351	NA	0.073812222	0.044245664	NA	NA	Tmem33	Tmem33_Intergenic_upstream	5	67228751	67228800	67228751	67228752	50	+	CGCCACTCGATTCCGGGATAATTTTTAATATATATGCAATAAATGTTCAC	Distal Intergenic	5	67260565	67291461	30897	1	Tmem33-201	-31765	NA	NA	NA	FALSE	TRUE	FALSE	FALSE	FALSE	FALSE	FALSE	FALSE	TRUE	Intergenic_upstream	22	22	67878	ENSMUSG00000037720	mapped to different genes
cg17355105	NA	NA	NA	NA	0.811148628	0.367122573	Gm18839	Gm18839_Intergenic_downstream	6	64864746	64864795	64864746	64864747	50	-	CGTGGGATGGCAAAGTCATCTTCATTAGACGGAATTTAATAGTGAATCAA	Distal Intergenic	6	64878459	64879128	670	2	Gm18839-201	14382	NA	NA	NA	FALSE	TRUE	FALSE	FALSE	FALSE	FALSE	FALSE	FALSE	TRUE	Intergenic_downstream	1	1	100417806	NA	mapped to different genes
cg17389888	NA	NA	NA	NA	-0.387658878	NA	Lhfpl3	Lhfpl3_Exon	5	22746288	22746337	22746288	22746289	50	+	CGGCGTGCTGTGGGCCATCTTCACCATCTGCTTTGCCATCGTCAACGTGG	Promoter (<=1kb)	5	22746059	23275597	529539	1	Lhfpl3-202	229	Lhfpl3-202	Lhfpl3	0	TRUE	FALSE	TRUE	FALSE	FALSE	TRUE	TRUE	FALSE	FALSE	Exon	11	11	269629	ENSMUSG00000106379	conserved gene and region	5	22746271	22746758	488	*	488	33
cg17466220	0.414961388	NA	NA	NA	1.907466969	NA	Nkx2-1	Nkx2-1_fiveUTR	12	56536677	56536726	56536677	56536678	50	+	CGCTTTGTGGCCACGCTGGATATTAGTAGATGAGGATCATTCTGCTTCAA	Promoter (<=1kb)	12	56531958	56536908	4951	2	Nkx2-1-201	182	Nkx2-1-202;Nkx2-1-201	Nkx2-1;Nkx2-1	0;0	TRUE	FALSE	TRUE	TRUE	FALSE	TRUE	TRUE	FALSE	FALSE	fiveUTR	6	29	21869	ENSMUSG00000001496	mapped to different genes	12	56536346	56536691	346	*	346	28
cg17475635	-0.030512254	NA	NA	NA	NA	NA	Rbfox1	Rbfox1_Intergenic_downstream	16	7520747	7520796	7520747	7520748	50	-	CGTAACTCACCCAGCATGTAAAACAAATAACTAGGCTGACATGTCTGAAG	Distal Intergenic	16	7352970	7409969	57000	1	Rbfox1-206	167826	NA	NA	NA	FALSE	TRUE	FALSE	FALSE	FALSE	FALSE	FALSE	FALSE	TRUE	Intergenic_downstream	3	35	268859	ENSMUSG00000008658	conserved gene and region
cg17514125	-0.154352684	NA	NA	NA	NA	NA	Lin28a	Lin28a_fiveUTR	4	134018103	134018152	134018103	134018104	50	-	CGGTCATGGACAGGAAGCCGAACCCCATGCGCACGTTGAACCACTTACAG	Promoter (<=1kb)	4	134003330	134018841	15512	2	Lin28a-201	689	Lin28a-201;Lin28a-204	Lin28a;Lin28a	0;0	TRUE	FALSE	TRUE	TRUE	FALSE	TRUE	FALSE	FALSE	FALSE	fiveUTR	2	5	83557	ENSMUSG00000050966	conserved gene but different region	4	134018067	134018242	176	*	176	24
cg17527148	NA	NA	NA	NA	-0.081795711	NA	Ranbp17	Ranbp17_threeUTR	11	33297381	33297430	33297429	33297430	50	+	AGTGCAAAGGCAATCCCTCGAAGATCTCTTGCCAGCCCGATCAACATACG	3' UTR	11	33211795	33513746	301952	2	Ranbp17-202	216316	Ranbp17-202;Ranbp17-206;Ranbp17-203	Ranbp17;Ranbp17;Ranbp17	0;0;0	TRUE	FALSE	FALSE	FALSE	TRUE	TRUE	FALSE	FALSE	FALSE	threeUTR	2	31	66011	ENSMUSG00000040594	conserved gene and region
cg17543458	NA	-0.41435688	NA	NA	NA	NA	Robo1	Robo1_Intron	16	73105741	73105790	73105789	73105790	50	+	GCATGACAAATTATGAAACACATACTGTGAAAATTATGGACTCTGTCACG	Intron (4930500H12Rik-208/4930500H12Rik-208, intron 2 of 5)	16	73006421	73008746	2326	1	Robo1-208	99320	NA	NA	NA	TRUE	FALSE	FALSE	FALSE	FALSE	FALSE	TRUE	FALSE	FALSE	Intron	5	8	19876	ENSMUSG00000022883	conserved gene but different region
cg17553901	-0.049782707	NA	NA	NA	NA	NA	Usp5	Usp5_Exon	6	124818520	124818569	124818520	124818521	50	+	CGTTGCCATAGAAACCAAGGCTACCTTTGGGCTCATCCGGAGTGACCAGG	Exon (Usp5-201/Usp5, exon 15 of 20)	6	124815019	124829484	14466	2	Usp5-201	10915	Tpi1-205;Tpi1-204;Tpi1-207;Tpi1-206;Usp5-201;Usp5-202;Usp5-204;Usp5-209;Usp5-203;Usp5-206;Usp5-205;Usp5-207	Tpi1;Tpi1;Tpi1;Tpi1;Usp5;Usp5;Usp5;Usp5;Usp5;Usp5;Usp5;Usp5	-4224;-4362;-4224;-4366;0;0;0;-627;4900;10839;5054;5631	TRUE	FALSE	FALSE	FALSE	FALSE	TRUE	TRUE	FALSE	FALSE	Exon	5	5	22225	ENSMUSG00000038429	conserved gene and region
cg17563080	NA	NA	0.014485688	NA	NA	NA	Pola1	Pola1_Exon	X	93561883	93561932	93561931	93561932	50	-	TCTGGATTTAAGTCTTGCTGTTTCATTAGCTGTTTGACTTGTTTTCTCCG	Exon (Pola1-201/Pola1, exon 25 of 37)	20	93304767	93632155	327389	2	Pola1-201	70223	Pola1-201	Pola1	0	TRUE	FALSE	FALSE	FALSE	FALSE	TRUE	FALSE	FALSE	FALSE	Exon	3	62	18968	ENSMUSG00000006678	conserved gene but different region
cg17589788	-0.039975587	NA	-0.320232686	NA	NA	NA	Mef2d	Mef2d_Exon	3	88158243	88158292	88158291	88158292	50	+	AATGTGAGAGCCCTGAGGTGGACGAGGTGTTTGCCCTGACCCCCCAGACG	Exon (Mef2d-202/Mef2d, exon 4 of 11)	3	88142372	88172086	29715	1	Mef2d-201	15871	Mef2d-201;Mef2d-204;Mef2d-202;Mef2d-203;Mef2d-206;Mef2d-205	Mef2d;Mef2d;Mef2d;Mef2d;Mef2d;Mef2d	0;0;0;0;15669;0	TRUE	FALSE	FALSE	FALSE	FALSE	TRUE	TRUE	FALSE	FALSE	Exon	6	10	17261	ENSMUSG00000001419	conserved gene and region
cg17596554	NA	NA	NA	NA	-0.424693649	NA	Nog	Nog_Promoter	11	89302541	89302590	89302541	89302542	50	-	CGTTGGCACCGGTTTGTCTGTCTCGCAGGGTCCAAGCCTTTAAATTTCCT	Promoter (<=1kb)	11	89300638	89302332	1695	2	Nog-201	-258	Nog-201	Nog	0	FALSE	TRUE	TRUE	FALSE	FALSE	FALSE	FALSE	FALSE	FALSE	Promoter	3	36	18121	ENSMUSG00000048616	conserved gene but different region	11	89301879	89302565	687	*	687	88
cg17611384	NA	NA	NA	NA	NA	0.231570662	Hoxb3	Hoxb3_Intron	11	96340755	96340804	96340803	96340804	50	+	GTTACGGAGAGTAGGGCGTACCAGTCTTATAGGGCAACCACACTGTGGCG	Intron (Hoxb3-202/Hoxb3, intron 1 of 3)	11	96323326	96347930	24605	1	Hoxb3-202	17429	Hoxb3-202;Hoxb3-203;Hoxb3-204;Hoxb3-201	Hoxb3;Hoxb3;Hoxb3;Hoxb3	0;0;0;0	TRUE	FALSE	FALSE	FALSE	FALSE	FALSE	TRUE	FALSE	FALSE	Intron	12	19	15410	ENSMUSG00000048763	conserved gene and region	11	96340759	96341024	266	*	266	25
cg17651973	NA	0.00096338	NA	0.092861566	NA	NA	Tank	Tank_Intergenic_downstream	2	61656476	61656525	61656524	61656525	50	+	AGCATTTGAGGCAGCAGCGTTCGCCTGCTGAACGGTGACAGATTGGCGCG	Distal Intergenic	2	61643831	61649977	6147	1	Tank-211	12645	Tank-205;Tank-201;Tank-206;Tank-203;Tank-204;Tank-202;Tank-208	Tank;Tank;Tank;Tank;Tank;Tank;Tank	0;0;0;0;0;0;0	FALSE	TRUE	FALSE	FALSE	FALSE	FALSE	FALSE	FALSE	TRUE	Intergenic_downstream	16	17	21353	ENSMUSG00000064289	mapped to different genes	2	61656429	61656917	489	*	489	60
cg17695612	NA	-0.00022915	NA	-0.166813365	NA	NA	Ddhd1	Ddhd1_threeUTR	14	45610723	45610772	45610723	45610724	50	-	CGATTCAGCTCTTGCTGAAGGCCTTTAACTAGCTGTTTGAAATAAGAAAA	3' UTR	14	45588467	45658142	69676	2	Ddhd1-203	47370	Ddhd1-203;Ddhd1-202;Ddhd1-201;Ddhd1-209;Ddhd1-205;Ddhd1-208;Ddhd1-206;Ddhd1-204	Ddhd1;Ddhd1;Ddhd1;Ddhd1;Ddhd1;Ddhd1;Ddhd1;Ddhd1	0;0;0;0;0;0;0;-1381	TRUE	FALSE	FALSE	FALSE	TRUE	TRUE	TRUE	FALSE	FALSE	threeUTR	3	3	114874	ENSMUSG00000037697	conserved gene but different region
cg17702804	NA	NA	NA	NA	0.640727194	NA	Rnf220	Rnf220_Intron	4	117411804	117411853	117411852	117411853	50	+	ACTGTTCCTTTTGAAGGCAGCCTGGTGCTACCCGCATGTACCTTAACCCG	Intron (Rnf220-201/Rnf220, intron 2 of 14)	4	117271463	117497052	225590	2	Rnf220-201	85199	Rnf220-201;Rnf220-207	Rnf220;Rnf220	0;0	TRUE	FALSE	FALSE	FALSE	FALSE	FALSE	TRUE	FALSE	FALSE	Intron	132	152	66743	ENSMUSG00000028677	conserved gene and region
cg17708456	0.165669092	NA	NA	NA	NA	NA	Mecom	Mecom_fiveUTR	3	30509774	30509823	30509822	30509823	50	-	TTTGGAGCGATTTATCACTTTGATTTGGAGATCTTGTCAGATGGCAATCG	Promoter (<=1kb)	3	29965456	30509822	544367	2	Mecom-207	0	Mecom-212;Mecom-213;Mecom-207;Mecom-208;Mecom-211;Mecom-209	Mecom;Mecom;Mecom;Mecom;Mecom;Mecom	0;0;0;0;0;0	TRUE	FALSE	TRUE	TRUE	FALSE	TRUE	TRUE	FALSE	FALSE	fiveUTR	13	80	14013	ENSMUSG00000027684	conserved gene and region	3	30509822	30509917	96	*	96	11
cg17711361	NA	NA	NA	0.491733927	NA	NA	C1ql4	C1ql4_Promoter	15	99089192	99089241	99089192	99089193	50	+	CGCTGCAGAGAGACACCCAGGTCCGTGTTTGGACTCCAATGTGACATATC	Promoter (1-2kb)	15	99084086	99087817	3732	2	C1ql4-201	-1375	C1ql4-201;Dnajc22-202	C1ql4;Dnajc22	-1375;0	FALSE	TRUE	TRUE	FALSE	FALSE	FALSE	FALSE	FALSE	FALSE	Promoter	2	2	239659	ENSMUSG00000001076	conserved gene and region	15	99089170	99089287	118	*	118	10
cg17755632	NA	NA	NA	NA	-0.000832978	-0.121975529	Nfia	Nfia_Intron	4	97990543	97990592	97990543	97990544	50	-	CGGAAATTAGGTCAGCCTTCTGGAACATTTATCATGTATACCTGTCACCA	Intron (Nfia-208/Nfia, intron 3 of 3)	4	97772734	98000466	227733	1	Nfia-208	217809	Nfia-208;Nfia-202;Nfia-203;Nfia-205;Nfia-201;Nfia-204;Nfia-207;Nfia-206	Nfia;Nfia;Nfia;Nfia;Nfia;Nfia;Nfia;Nfia	0;0;0;0;0;0;0;0	TRUE	FALSE	FALSE	FALSE	FALSE	FALSE	TRUE	FALSE	FALSE	Intron	24	44	18027	ENSMUSG00000028565	conserved gene and region
cg17783509	NA	NA	NA	NA	-0.504197756	NA	Phox2b	Phox2b_fiveUTR	5	67099267	67099316	67099315	67099316	50	+	TATCATTGATTCCTGCATCTCTAATTAGAATTTAATACCACACCATTACG	Promoter (<=1kb)	5	67094399	67099301	4903	2	Phox2b-201	0	Phox2b-201;Phox2b-202	Phox2b;Phox2b	0;0	TRUE	FALSE	TRUE	TRUE	FALSE	TRUE	FALSE	FALSE	FALSE	fiveUTR	6	28	18935	ENSMUSG00000012520	conserved gene but different region
cg17784271	NA	-0.325049018	NA	NA	NA	NA	Kit	Kit_Intron	5	75591844	75591893	75591844	75591845	50	+	CGATTTCTAGGTGTAAAAGCCAGGCAGATTTGCTCACTCAAGAAAATCTG	Intron (Kit-204/Kit, intron 1 of 20)	5	75574916	75656722	81807	1	Kit-204	16928	Kit-204;Kit-201	Kit;Kit	0;0	TRUE	FALSE	FALSE	FALSE	FALSE	FALSE	TRUE	FALSE	FALSE	Intron	1	1	16590	ENSMUSG00000005672	conserved gene and region
cg17797814	NA	0.471452697	NA	NA	NA	NA	Hoxc5	Hoxc5_Exon	15	103009686	103009735	103009734	103009735	50	-	TTCCACCGCCTATGATCCAGTGAGGCATTTCTCGACCTATGGAGCGGCCG	Exon (Hoxc6-202/Hoxc6, exon 2 of 3)	15	102967443	103015676	48234	1	Hoxc5-202	42243	Hoxc5-202;Hoxc5-201;Hoxc6-202;Hoxc6-203;Hoxc6-201	Hoxc5;Hoxc5;Hoxc6;Hoxc6;Hoxc6	0;0;0;0;0	TRUE	FALSE	FALSE	FALSE	FALSE	TRUE	TRUE	FALSE	FALSE	Exon	72	134	15424	ENSMUSG00000022485	mapped to different genes	15	103009647	103009812	166	*	166	14
cg17824274	NA	NA	NA	NA	-0.153576287	NA	Galnt3	Galnt3_Exon	2	66093562	66093611	66093610	66093611	50	+	CTCCTATAAAATATTTCCTTGTATTCATCCATCCAGACTTCTGCAAGGCG	Exon (Galnt3-201/Galnt3, exon 7 of 11)	2	66082766	66124994	42229	2	Galnt3-201	31383	Galnt3-201;Galnt3-204;Galnt3-202;Galnt3-203	Galnt3;Galnt3;Galnt3;Galnt3	0;0;0;8872	TRUE	FALSE	FALSE	FALSE	FALSE	TRUE	FALSE	FALSE	FALSE	Exon	2	2	14425	ENSMUSG00000026994	conserved gene but different region
cg17829569	NA	NA	0.248480212	NA	NA	NA	Gm14515	Gm14515_Intergenic_upstream	X	11490190	11490239	11490190	11490191	50	-	CGTGTGTATTTGTGTAGTTGGAGTGAATAAATGTTTAAATCAGTGTGTCA	Distal Intergenic	20	11601354	11601569	216	1	Gm14515-201	-111164	NA	NA	NA	FALSE	TRUE	FALSE	FALSE	FALSE	FALSE	FALSE	FALSE	TRUE	Intergenic_upstream	21	28	NA	NA	mapped to different genes
cg17866805	NA	NA	NA	NA	0.231419429	NA	Hoxa13	Hoxa13_Exon	6	52259888	52259937	52259936	52259937	50	+	GGGGAGGCTGCGCCTGCTCTTTGGGGCAGTACATTTGGCCGTTCCAGCCG	Promoter (<=1kb)	6	52257694	52260803	3110	2	Hoxa13-203	866	Hoxa13-203;Hoxa13-201;Hoxa13-202;Hoxa13-204;Hoxa13-205;Hoxa13-206	Hoxa13;Hoxa13;Hoxa13;Hoxa13;Hoxa13;Hoxa13	0;0;0;0;0;0	TRUE	FALSE	TRUE	FALSE	FALSE	TRUE	FALSE	FALSE	FALSE	Exon	4	12	15398	ENSMUSG00000038203	mapped to different genes
cg17946107	NA	NA	0.361096508	NA	NA	NA	Ptch1	Ptch1_Intron	13	63571238	63571287	63571286	63571287	50	+	GTAAAACAATTCCAGCTTATTGTGTGTCTTTCTTTCATACTGCTAATCCG	Intron (Ptch1-204/Ptch1, intron 1 of 23)	13	63508329	63573460	65132	2	Ptch1-204	2173	Ptch1-204;Ptch1-205	Ptch1;Ptch1	0;0	TRUE	FALSE	FALSE	FALSE	FALSE	FALSE	TRUE	FALSE	FALSE	Intron	22	36	19206	ENSMUSG00000021466	conserved gene and region
cg18010237	-0.04410771	NA	NA	NA	NA	NA	Zfp608	Zfp608_Intron	18	54990402	54990451	54990402	54990403	50	-	CGGGATAAATTAGTGAAAGGGAAGAAAGAATAAGAAGAAAGGACTGAAAA	Intron (Gm4221-203/Gm4221-203, intron 1 of 1)	18	54888723	54992555	103833	2	Zfp608-203	2104	Zfp608-201;Zfp608-203	Zfp608;Zfp608	0;0	TRUE	FALSE	FALSE	FALSE	FALSE	FALSE	TRUE	FALSE	FALSE	Intron	16	32	269023	ENSMUSG00000052713	conserved gene and region
cg18030834	NA	NA	NA	NA	0.100518141	NA	Fgfr2	Fgfr2_Intron	7	131542583	131542632	131542631	131542632	50	-	ACTCCCCGCATTTAACTTGGATGACATTTTGATTTCATCATTAGCATCCG	Intron (Fgfr2-217/Fgfr2, intron 2 of 6)	7	130162451	133123350	2960900	2	Fgfr2-217	1580718	Fgfr2-217;Hmx3-201	Fgfr2;Hmx3	0;0	TRUE	FALSE	FALSE	FALSE	FALSE	FALSE	TRUE	FALSE	FALSE	Intron	58	79	14183	ENSMUSG00000030849	mapped to different genes	7	131542631	131543412	782	*	782	92
cg18033250	NA	-0.152345395	NA	NA	NA	NA	Gm11235	Gm11235_Intergenic_upstream	4	72385056	72385105	72385104	72385105	50	+	TGTTTACTTCCTCCAGAAACAAGAGCATCATCAGCACGCTCAGTGCATCG	Distal Intergenic	4	72542666	72542998	333	1	Gm11235-201	-157561	NA	NA	NA	FALSE	TRUE	FALSE	FALSE	FALSE	FALSE	FALSE	FALSE	TRUE	Intergenic_upstream	6	8	NA	NA	mapped to different genes
cg18131423	NA	NA	NA	0.265952798	NA	NA	Atxn2l	Atxn2l_Exon	7	126492776	126492825	126492824	126492825	50	+	CTCCTGGAAATCCAGGCGCCTGGCCAGGCTGCTCACCTTGGGGGTGTCCG	Exon (Atxn2l-201/Atxn2l, exon 22 of 23)	7	126491708	126503437	11730	2	Atxn2l-201	10612	Atxn2l-201;Atxn2l-203;Atxn2l-206;Atxn2l-205;Atxn2l-202;Tufm-201;Tufm-202;Tufm-203;Tufm-204;Tufm-205;Tufm-206	Atxn2l;Atxn2l;Atxn2l;Atxn2l;Atxn2l;Tufm;Tufm;Tufm;Tufm;Tufm;Tufm	0;0;0;0;0;5415;5398;5147;4162;4090;3405	TRUE	FALSE	FALSE	FALSE	FALSE	TRUE	TRUE	FALSE	FALSE	Exon	5	13	233871	ENSMUSG00000032637	conserved gene but different region
cg18135595	NA	NA	NA	NA	0.11828112	NA	Uncx	Uncx_Promoter	5	139540003	139540052	139540051	139540052	50	-	AAAATTAACTTGCGTGAAGTTAATTGAGTAATTAAAACCCTCAACTGCCG	Promoter (3-4kb)	5	139543494	139548179	4686	1	Uncx-201	-3491	Uncx-201;Uncx-202	Uncx;Uncx	0;0	TRUE	FALSE	TRUE	FALSE	FALSE	FALSE	TRUE	FALSE	FALSE	Promoter	22	88	22255	ENSMUSG00000029546	conserved gene and region
cg18160481	NA	NA	NA	0.047010235	NA	NA	Son	Son_Intron	16	91662385	91662434	91662385	91662386	50	+	CGAAATACAGATGTGGCAGCGGCAGAAGCTCTGTTTAGCAGGCCATTATC	Intron (Son-203/Son, intron 4 of 11)	16	91647506	91679207	31702	1	Son-203	14879	Son-203;Son-204;Son-202;Son-208;Son-201;Son-205;Son-212;Son-207	Son;Son;Son;Son;Son;Son;Son;Son	0;0;0;0;0;0;0;0	TRUE	FALSE	FALSE	FALSE	FALSE	FALSE	TRUE	FALSE	FALSE	Intron	3	31	20658	ENSMUSG00000022961	conserved gene and region
cg18194663	NA	-1.311719333	NA	NA	NA	NA	Sin3a	Sin3a_Intron	9	57075743	57075792	57075791	57075792	50	+	TCTAGTGTAAACATTCCACAAAAGGACTGCTAAGGTTCAGCCTCCTCGCG	Intron (Sin3a-209/Sin3a, intron 1 of 2)	9	57072040	57089496	17457	1	Sin3a-209	3703	Sin3a-209;Sin3a-204;Sin3a-208;Sin3a-206;Sin3a-202	Sin3a;Sin3a;Sin3a;Sin3a;Sin3a	0;0;0;0;-836	TRUE	FALSE	FALSE	FALSE	FALSE	FALSE	TRUE	FALSE	FALSE	Intron	1	4	20466	ENSMUSG00000042557	conserved gene and region	9	57075789	57075916	128	*	128	12
cg18257298	NA	NA	NA	NA	-1.540537118	NA	Fezf2	Fezf2_fiveUTR	14	12345694	12345743	12345742	12345743	50	-	ACATTCAGCTGACATCACATGAAGTCACTTGAAGTGGAATGACATGGGCG	Promoter (<=1kb)	14	12342094	12345844	3751	2	Fezf2-203	101	Fezf2-203;Fezf2-201;Fezf2-202	Fezf2;Fezf2;Fezf2	0;0;0	TRUE	FALSE	TRUE	TRUE	FALSE	TRUE	FALSE	FALSE	FALSE	fiveUTR	13	45	54713	ENSMUSG00000021743	conserved gene and region	14	12345742	12345947	206	*	206	23
cg18281552	-0.175321105	-0.511459489	-0.470734385	NA	NA	NA	Cxxc5	Cxxc5_Intron	18	35848074	35848123	35848122	35848123	50	+	CAAAAATGAAACCAATTAAGGACAAACTTTGAAAGCCTCTAATTGCTGCG	Intron (Gm50371-201/Gm50371-201, intron 4 of 4)	18	35829397	35859002	29606	1	Cxxc5-202	18677	Cxxc5-202;Cxxc5-201;Cxxc5-206;Cxxc5-203	Cxxc5;Cxxc5;Cxxc5;Cxxc5	0;0;0;0	TRUE	FALSE	FALSE	FALSE	FALSE	FALSE	TRUE	FALSE	FALSE	Intron	26	49	67393	ENSMUSG00000046668	conserved gene and region
cg18284930	NA	NA	NA	NA	-0.589185576	-0.757079122	Fezf2	Fezf2_fiveUTR	14	12345673	12345722	12345673	12345674	50	-	CGCGTGAGATCACTGTCTTTTACATTCAGCTGACATCACATGAAGTCACT	Promoter (<=1kb)	14	12342094	12345844	3751	2	Fezf2-203	122	Fezf2-203;Fezf2-201;Fezf2-202	Fezf2;Fezf2;Fezf2	0;0;0	TRUE	FALSE	TRUE	TRUE	FALSE	TRUE	FALSE	FALSE	FALSE	fiveUTR	13	45	54713	ENSMUSG00000021743	conserved gene and region
cg18288070	-0.019541358	NA	NA	NA	NA	NA	Gm48316	Gm48316_Intergenic_upstream	13	94710220	94710269	94710268	94710269	50	-	AACTCTCTTTTATTTCCAACAGCCCTAATCAGCCGCTCTCATTACAAACG	Distal Intergenic	13	94752270	94752593	324	1	Gm48316-201	-42050	NA	NA	NA	FALSE	TRUE	FALSE	FALSE	FALSE	FALSE	FALSE	FALSE	TRUE	Intergenic_upstream	36	42	NA	NA	mapped to different genes
cg18334881	NA	-0.220888016	NA	NA	NA	NA	Lbx1	Lbx1_Intergenic_downstream	19	45229374	45229423	45229422	45229423	50	+	TGGGATTAATTACCACGTTCTGGTCCCTCAGACTGGAGTATTACTTATCG	Distal Intergenic	19	45232684	45235812	3129	2	Lbx1-201	6389	Lbx1-201	Lbx1	0	FALSE	TRUE	FALSE	FALSE	FALSE	FALSE	FALSE	FALSE	TRUE	Intergenic_downstream	30	50	16814	ENSMUSG00000025216	mapped to different genes	19	45229389	45229613	225	*	225	22
cg18336804	NA	NA	1.329913241	NA	NA	NA	Gm42715	Gm42715_Exon	7	127534572	127534621	127534572	127534573	50	+	CGAGTTAAGGTGGATGTTGAGAAGCAGATGCCCAAAAAGTACGAGCATGT	Exon (Srcap-204/Srcap, exon 17 of 21)	7	127519584	127567054	47471	1	Gm42715-201	14988	Gm42715-201;Srcap-204;Srcap-201;Srcap-208;Srcap-207;Srcap-206;Srcap-214;Srcap-213	Gm42715;Srcap;Srcap;Srcap;Srcap;Srcap;Srcap;Srcap	0;0;0;0;0;0;0;0	TRUE	FALSE	FALSE	FALSE	FALSE	TRUE	FALSE	FALSE	FALSE	Exon	7	7	NA	NA	mapped to different genes
cg18394148	NA	NA	NA	NA	-3.162654799	NA	Celf6	Celf6_Exon	9	59578588	59578637	59578588	59578589	50	-	CGCATCTACGAGCTGACGGTGCTGAAGGACCGGCTCACCGGCCTCCACAA	Promoter (<=1kb)	9	59577917	59607292	29376	1	Celf6-207	671	Celf6-207;Celf6-203;Celf6-205;Celf6-201	Celf6;Celf6;Celf6;Celf6	0;0;0;0	TRUE	FALSE	TRUE	FALSE	FALSE	TRUE	FALSE	FALSE	FALSE	Exon	6	8	76183	ENSMUSG00000032297	conserved gene but different region	9	59577836	59578646	811	*	811	79
cg18404903	0.025162269	NA	NA	NA	NA	NA	Galnt17	Galnt17_Exon	5	131081560	131081609	131081560	131081561	50	+	CGGCGTCCCACCAGTCTTTTGGGGGGCTGATGTACATGCACCACAGCTCC	Exon (Galnt17-201/Galnt17, exon 5 of 11)	5	130872082	131308497	436416	2	Galnt17-201	226888	Galnt17-201;Galnt17-202;Galnt17-203	Galnt17;Galnt17;Galnt17	0;0;225306	TRUE	FALSE	FALSE	FALSE	FALSE	TRUE	FALSE	FALSE	FALSE	Exon	1	1	212996	ENSMUSG00000034040	conserved gene and region
cg18409102	NA	NA	NA	-0.209273415	NA	NA	Zbtb16	Zbtb16_Intron	9	48733957	48734006	48734005	48734006	50	+	TCTGCTCAGCTGGTTTTAAATGAAGTTATTATGAGTCATTAAAACACCCG	Intron (Zbtb16-201/Zbtb16, intron 3 of 6)	9	48654297	48835945	181649	2	Zbtb16-201	101939	Zbtb16-201;Zbtb16-202	Zbtb16;Zbtb16	0;0	TRUE	FALSE	FALSE	FALSE	FALSE	FALSE	TRUE	FALSE	FALSE	Intron	31	37	235320	ENSMUSG00000066687	conserved gene and region
cg18452899	NA	NA	NA	NA	NA	-0.028029032	Pax2	Pax2_Intron	19	44820311	44820360	44820311	44820312	50	+	CGGCTGATCCATCTGGATCCAAGTGTGAGAAAAGTTCATTTCAGACCCAG	Intron (Pax2-203/Pax2, intron 7 of 9)	19	44756045	44837851	81807	1	Pax2-203	64266	Pax2-203;Pax2-201;Pax2-202	Pax2;Pax2;Pax2	0;0;0	TRUE	FALSE	FALSE	FALSE	FALSE	FALSE	TRUE	FALSE	FALSE	Intron	35	166	18504	ENSMUSG00000004231	conserved gene and region
cg18478130	NA	NA	-0.22295431	NA	NA	NA	Rbm15	Rbm15_Intergenic_downstream	3	107324886	107324935	107324886	107324887	50	-	CGAGGTTAAAATTCAAAACAAGCCCAACAAGCCTGCATTTCAAGGTGGTC	Distal Intergenic	3	107327135	107333101	5967	2	Rbm15-202	8215	Rbm15-201;Rbm15-202	Rbm15;Rbm15	0;0	FALSE	TRUE	FALSE	FALSE	FALSE	FALSE	FALSE	FALSE	TRUE	Intergenic_downstream	5	9	229700	ENSMUSG00000048109	conserved gene but different region
cg18486261	NA	NA	NA	0.209650161	NA	NA	Ccnl1	Ccnl1_threeUTR	3	65946880	65946929	65946928	65946929	50	+	CTGTGACTGCGGGACCTGCTTCTTGATCTCGAGCTGTATGTTCCAGATCG	3' UTR	3	65946151	65958162	12012	2	Ccnl1-203	11233	Ccnl1-203;Ccnl1-214;Ccnl1-202;Ccnl1-201;Ccnl1-205;Ccnl1-206;Ccnl1-212;Ccnl1-207;Ccnl1-213;Ccnl1-211;Ccnl1-208;Ccnl1-204;Ccnl1-209;Ccnl1-210	Ccnl1;Ccnl1;Ccnl1;Ccnl1;Ccnl1;Ccnl1;Ccnl1;Ccnl1;Ccnl1;Ccnl1;Ccnl1;Ccnl1;Ccnl1;Ccnl1	0;0;0;0;0;0;0;0;0;0;0;4939;6064;0	TRUE	FALSE	FALSE	FALSE	TRUE	TRUE	FALSE	FALSE	FALSE	threeUTR	7	7	56706	ENSMUSG00000027829	conserved gene and region
cg18538769	NA	0.093000099	NA	NA	NA	NA	C2cd2l	C2cd2l_Exon	9	44317005	44317054	44317053	44317054	50	-	TTGGTGGCAGTGTCAGAGTGACGTGGTAGGTCTCCATGGAGACGGCAGCG	Exon (C2cd2l-201/C2cd2l, exon 3 of 14)	9	44309237	44320285	11049	2	C2cd2l-201	3231	C2cd2l-201;C2cd2l-208;C2cd2l-202;C2cd2l-204;C2cd2l-203;C2cd2l-206;C2cd2l-209;C2cd2l-207;C2cd2l-205	C2cd2l;C2cd2l;C2cd2l;C2cd2l;C2cd2l;C2cd2l;C2cd2l;C2cd2l;C2cd2l	0;0;-2056;-2550;-3166;0;-1718;-851;-132	TRUE	FALSE	FALSE	FALSE	FALSE	TRUE	FALSE	FALSE	FALSE	Exon	1	1	71764	ENSMUSG00000032120	conserved gene and region
cg18539981	0.368384821	NA	NA	NA	NA	NA	Cacna1e	Cacna1e_Exon	1	154561732	154561781	154561732	154561733	50	-	CGGAAAGCACTCCCAGGACTAGGTTGAGAACAAAGAAGGATCCAATGATG	Exon (Cacna1e-203/Cacna1e, exon 7 of 47)	1	154390731	154726356	335626	2	Cacna1e-203	164575	Cacna1e-203;Cacna1e-201;Cacna1e-207;Cacna1e-206;Cacna1e-209	Cacna1e;Cacna1e;Cacna1e;Cacna1e;Cacna1e	0;0;0;0;0	TRUE	FALSE	FALSE	FALSE	FALSE	TRUE	FALSE	FALSE	FALSE	Exon	10	19	12290	ENSMUSG00000004110	conserved gene and region
cg18639088	NA	NA	NA	NA	0.457278075	NA	Meis2	Meis2_Intergenic_downstream	2	115856506	115856555	115856506	115856507	50	-	CGGACTTGGGGTGTGAGCCCAGCTCAACTTCATCTATTAATTTAACATGT	Distal Intergenic	2	115864227	115868867	4641	2	Meis2-219	12361	NA	NA	NA	FALSE	TRUE	FALSE	FALSE	FALSE	FALSE	FALSE	FALSE	TRUE	Intergenic_downstream	10	97	17536	ENSMUSG00000027210	mapped to different genes
cg18701907	NA	-0.176927743	NA	NA	NA	NA	Usp25	Usp25_Exon	16	77237200	77237249	77237200	77237201	50	+	CGGCCATGCTCGAAGCCAGCTCTGCAGCTCAGCCAATCAGTGACATCATT	Exon (Mir99ahg-214/Mir99ahg-214, exon 2 of 4)	16	77083900	77108205	24306	1	Usp25-203	153300	NA	NA	NA	TRUE	FALSE	FALSE	FALSE	FALSE	TRUE	FALSE	FALSE	FALSE	Exon	4	5	30940	ENSMUSG00000022867	mapped to different genes
cg18766286	-1.542831404	NA	NA	NA	NA	NA	Lcor	Lcor_Exon	19	41558790	41558839	41558838	41558839	50	-	ATCAGTACAGCTATAGCTCTTTGGTAATGGGTTCACAAACGGAGAGCGCG	Exon (Lcor-201/Lcor, exon 8 of 8)	19	41482637	41562261	79625	1	Lcor-201	76153	Lcor-201;Lcor-204;Lcor-206;Lcor-202;Lcor-205	Lcor;Lcor;Lcor;Lcor;Lcor	0;0;0;0;0	TRUE	FALSE	FALSE	FALSE	FALSE	TRUE	TRUE	FALSE	FALSE	Exon	14	25	212391	ENSMUSG00000025019	mapped to different genes
cg18776124	-0.358059351	NA	-0.811449542	NA	NA	NA	Dlg2	Dlg2_Exon	7	90477023	90477072	90477023	90477024	50	-	CGAAGAGATGGCATGATGTGAATGACTCCAGTGTGAAGAAATCTGCTTCG	Promoter (<=1kb)	7	90476672	90479068	2397	1	Dlg2-211	351	Dlg2-211;Dlg2-215;Dlg2-216;Dlg2-217;Tmem126b-201;Tmem126b-202	Dlg2;Dlg2;Dlg2;Dlg2;Tmem126b;Tmem126b	0;0;-100;0;-1022;-1028	TRUE	FALSE	TRUE	FALSE	FALSE	TRUE	TRUE	FALSE	FALSE	Exon	12	21	23859	ENSMUSG00000052572	conserved gene but different region
cg18779960	NA	NA	NA	NA	0.1416087	NA	Hoxc4	Hoxc4_Intergenic_downstream	15	103061674	103061723	103061674	103061675	50	-	CGCAGCCGCCTTTGTACGCGTGATTTATGACTTCAGTCTTGGTTCACCAA	Distal Intergenic	15	103034395	103036852	2458	1	Hoxc4-201	27328	NA	NA	NA	FALSE	TRUE	FALSE	FALSE	FALSE	FALSE	FALSE	FALSE	TRUE	Intergenic_downstream	32	91	15423	ENSMUSG00000075394	mapped to different genes	15	103061537	103061809	273	*	273	19
cg18808650	NA	0.393463237	NA	NA	NA	NA	Map4k4	Map4k4_Exon	1	40000592	40000641	40000640	40000641	50	+	AACAAGAACAAGCATATCTCCTGTCTCTACAGCATGACCATAGGAGGCCG	Exon (Map4k4-201/Map4k4, exon 15 of 31)	1	39900913	40026310	125398	1	Map4k4-201	99679	Map4k4-201;Map4k4-202;Map4k4-213;Map4k4-218;Map4k4-215;Map4k4-217;Map4k4-209;Map4k4-216;Map4k4-208;Map4k4-206;Map4k4-205	Map4k4;Map4k4;Map4k4;Map4k4;Map4k4;Map4k4;Map4k4;Map4k4;Map4k4;Map4k4;Map4k4	0;0;0;0;0;0;0;0;0;0;0	TRUE	FALSE	FALSE	FALSE	FALSE	TRUE	TRUE	FALSE	FALSE	Exon	12	12	26921	ENSMUSG00000026074	conserved gene and region	1	40000626	40000692	67	*	67	7
cg18809289	NA	NA	NA	NA	-0.023318813	NA	Alox5	Alox5_Exon	6	116460887	116460936	116460935	116460936	50	-	GAAGTCGTTGTAGAAGGGCTTGTCCAGCAGGTGCTTCTCGCTGCAGCCCG	Promoter (<=1kb)	6	116410077	116461178	51102	2	Alox5-201	242	Alox5-201;Alox5-204;Alox5-208;Alox5-202;Alox5-207	Alox5;Alox5;Alox5;Alox5;Alox5	0;0;0;0;0	TRUE	FALSE	TRUE	FALSE	FALSE	TRUE	FALSE	FALSE	FALSE	Exon	3	3	11689	ENSMUSG00000025701	conserved gene and region	6	116460821	116461250	430	*	430	34
cg18833170	NA	NA	NA	-0.039814497	NA	NA	Tnrc6a	Tnrc6a_threeUTR	7	123162703	123162752	123162703	123162704	50	-	CGATTTCGCCACCAGGAACACAAACAGCTTCTAAAGAGGGGTCAGCATTT	3' UTR	7	123124177	123193987	69811	1	Tnrc6a-203	38526	Tnrc6a-209;Tnrc6a-203;Tnrc6a-201;Tnrc6a-210	Tnrc6a;Tnrc6a;Tnrc6a;Tnrc6a	0;0;0;0	TRUE	FALSE	FALSE	FALSE	TRUE	TRUE	TRUE	TRUE	FALSE	threeUTR	5	24	233833	ENSMUSG00000052707	conserved gene but different region
cg18862618	NA	0.1620311	NA	NA	NA	NA	Fam102b	Fam102b_Exon	3	108992684	108992733	108992684	108992685	50	-	CGGCGAGTGGTATTTCCTGATCCAGCAAACTCTGCCAGGTTTAGATCTGC	Exon (Fam102b-201/Fam102b, exon 4 of 11)	3	108970997	109027273	56277	2	Fam102b-201	34540	Fam102b-201;Fam102b-202	Fam102b;Fam102b	0;0	TRUE	FALSE	FALSE	FALSE	FALSE	TRUE	FALSE	FALSE	FALSE	Exon	1	3	329739	ENSMUSG00000040339	conserved gene and region
cg18864227	0.04124236	NA	NA	NA	NA	NA	Zeb2	Zeb2_Intergenic_upstream	2	45185320	45185369	45185368	45185369	50	-	TCTCTGTTTCCTTTCTGCCAGTACCTAATATCAGCTATGCCCAGGAGCCG	Distal Intergenic	2	44983632	45117395	133764	2	Zeb2-212	-67974	NA	NA	NA	FALSE	TRUE	FALSE	FALSE	FALSE	FALSE	FALSE	FALSE	TRUE	Intergenic_upstream	9	158	24136	ENSMUSG00000026872	mapped to different genes
cg18872272	0.248355313	NA	NA	NA	NA	NA	Acap2	Acap2_threeUTR	16	31101833	31101882	31101881	31101882	50	+	CCATAAAGTCCTTCTGATTCCCGCATCTCTTCATTCATTCTTGCTAAACG	3' UTR	16	31092412	31201245	108834	2	Acap2-204	99363	Acap2-204;Acap2-201;Acap2-203;Acap2-202;Acap2-206;Acap2-207	Acap2;Acap2;Acap2;Acap2;Acap2;Acap2	0;0;0;0;0;0	TRUE	FALSE	FALSE	FALSE	TRUE	TRUE	FALSE	FALSE	FALSE	threeUTR	1	4	78618	ENSMUSG00000049076	conserved gene but different region
cg18891221	NA	NA	-0.044386291	NA	NA	NA	Lrmda	Lrmda_Intron	14	22783630	22783679	22783630	22783631	50	-	CGTGCTCAGCAGAGGACTGCAATTACAGTTTAAGACAGCTACTTTTTATT	Intron (Lrmda-201/Lrmda, intron 5 of 6)	14	22019712	23056085	1036374	1	Lrmda-201	763918	Lrmda-201;Lrmda-204;Lrmda-206	Lrmda;Lrmda;Lrmda	0;0;0	TRUE	FALSE	FALSE	FALSE	FALSE	FALSE	TRUE	FALSE	FALSE	Intron	157	157	76633	ENSMUSG00000063458	conserved gene and region
cg18913902	NA	0.175545632	NA	NA	NA	0.327918191	Cadps2	Cadps2_Intron	6	23273022	23273071	23273070	23273071	50	+	GCCAGGAGTTGCCACTGACTATGGAAATTGCCACACCAGGGCTATAAACG	Intron (Cadps2-213/Cadps2, intron 28 of 29)	6	23262773	23839137	576365	2	Cadps2-213	566066	Cadps2-213;Cadps2-205;Cadps2-212;Cadps2-201;Cadps2-209;Cadps2-206;Cadps2-211;Cadps2-207;Cadps2-202;Cadps2-210	Cadps2;Cadps2;Cadps2;Cadps2;Cadps2;Cadps2;Cadps2;Cadps2;Cadps2;Cadps2	0;0;0;0;0;0;0;0;0;0	TRUE	FALSE	FALSE	FALSE	FALSE	FALSE	TRUE	FALSE	FALSE	Intron	13	15	320405	ENSMUSG00000017978	conserved gene and region
cg18961523	NA	0.000415809	NA	NA	NA	NA	Fam120a	Fam120a_Exon	13	48910322	48910371	48910370	48910371	50	-	TAAACAGGACTCCGTAAACATACTGACGAACTGGCCTATAGAGCAGAGCG	Exon (Fam120a-201/Fam120a, exon 10 of 18)	13	48879219	48968017	88799	2	Fam120a-201	57646	Fam120a-201	Fam120a	0	TRUE	FALSE	FALSE	FALSE	FALSE	TRUE	FALSE	FALSE	FALSE	Exon	7	8	218236	ENSMUSG00000038014	conserved gene and region
cg18966350	0.03840389	NA	NA	NA	NA	NA	Tfap2d	Tfap2d_Exon	1	19166125	19166174	19166125	19166126	50	-	CGGAAAACTTCAGAGGCTGCCGTGAAAGAGGGCAAAACAGAAAAGACAGA	Exon (Tfap2d-201/Tfap2d, exon 8 of 8)	1	19103022	19166346	63325	1	Tfap2d-201	63103	Tfap2d-201	Tfap2d	0	TRUE	FALSE	FALSE	FALSE	FALSE	TRUE	FALSE	FALSE	FALSE	Exon	14	23	226896	ENSMUSG00000042596	conserved gene and region
cg19046398	-0.349689514	NA	NA	NA	NA	NA	Nol4l	Nol4l_Exon	2	153529491	153529540	153529491	153529492	50	-	CGGCCGCTGCCCAGGCGGAAGCCCTTGGAGCGCACCCAGAACTGGAACTT	Promoter (<=1kb)	2	153407462	153529971	122510	2	Nol4l-201	431	Nol4l-201	Nol4l	0	TRUE	FALSE	TRUE	FALSE	FALSE	TRUE	FALSE	FALSE	FALSE	Exon	10	14	329540	ENSMUSG00000061411	conserved gene and region	2	153528543	153530628	2086	*	2086	233
cg19047543	NA	0.034352192	NA	NA	NA	NA	Eri3	Eri3_Intron	4	117605898	117605947	117605946	117605947	50	+	CCCTCCCCTCTCATACAATATTTATCCAGGGATGGGAGTCAGATGCAGCG	Intron (Eri3-201/Eri3, intron 6 of 8)	4	117550365	117674297	123933	1	Eri3-201	55533	Eri3-201;Eri3-206;Eri3-202;Eri3-204	Eri3;Eri3;Eri3;Eri3	0;0;0;0	TRUE	FALSE	FALSE	FALSE	FALSE	FALSE	TRUE	FALSE	FALSE	Intron	82	97	140546	ENSMUSG00000033423	conserved gene and region
cg19092999	-0.133031327	NA	NA	NA	NA	NA	Usf3	Usf3_Promoter	16	44172956	44173005	44173004	44173005	50	+	CTACCTTTAAGAATATTTCCTGTTTCTTCAACCCAACTTGCACACCTCCG	Promoter (<=1kb)	16	44173246	44227465	54220	1	Usf3-202	-241	Usf3-202;Usf3-201;Usf3-203;Usf3-204	Usf3;Usf3;Usf3;Usf3	-241;-392;-392;-392	FALSE	TRUE	TRUE	FALSE	FALSE	FALSE	FALSE	FALSE	FALSE	Promoter	1	1	207806	ENSMUSG00000068284	conserved gene and region	16	44173004	44173764	761	*	761	86
cg19106010	NA	NA	NA	NA	0.775316195	NA	Ankrd44	Ankrd44_Exon	1	54778303	54778352	54778351	54778352	50	-	ACAGCCCGGTGCAGTGGAGTCAGCCACATGTTGTCCTTGGCATTTACACG	Exon (Ankrd44-210/Ankrd44, exon 4 of 28)	1	54645340	54926387	281048	2	Ankrd44-210	148035	Ankrd44-210;Ankrd44-201;Ankrd44-209;Ankrd44-214;Ankrd44-208;Ankrd44-202	Ankrd44;Ankrd44;Ankrd44;Ankrd44;Ankrd44;Ankrd44	0;0;0;0;0;0	TRUE	FALSE	FALSE	FALSE	FALSE	TRUE	FALSE	FALSE	FALSE	Exon	3	3	329154	ENSMUSG00000052331	conserved gene and region
cg19204561	-0.088026537	NA	NA	NA	NA	NA	Add3	Add3_Intron	19	53194809	53194858	53194809	53194810	50	-	CGTGACATGAACTTTGTGTGTAAGAGTGGGTTCATTGAATTAAAAAAAAG	Intron (Add3-203/Add3, intron 1 of 13)	19	53140443	53247399	106957	1	Add3-203	54366	Add3-203;Add3-208;Add3-205;Add3-212;Add3-216;Add3-204;Add3-211;Add3-202;Add3-215;Add3-213;Add3-214;Add3-201;Add3-206;Add3-207;Add3-209;Add3-210	Add3;Add3;Add3;Add3;Add3;Add3;Add3;Add3;Add3;Add3;Add3;Add3;Add3;Add3;Add3;Add3	0;0;0;0;0;0;0;0;0;0;0;0;0;0;0;-3188	TRUE	FALSE	FALSE	FALSE	FALSE	FALSE	TRUE	FALSE	FALSE	Intron	1	3	27360	ENSMUSG00000025026	conserved gene and region
cg19272508	-2.496807773	NA	NA	NA	NA	NA	Trim8	Trim8_Exon	19	46502797	46502846	46502797	46502798	50	-	CGTGCAGACGCACCTGCAGCAGCCCTCCACCGCCCGCGGGCACCTCCTGG	Exon (Trim8-201/Trim8, exon 1 of 6)	19	46501702	46516848	15147	1	Trim8-201	1095	Trim8-201	Trim8	0	TRUE	FALSE	FALSE	FALSE	FALSE	TRUE	FALSE	FALSE	FALSE	Exon	15	21	93679	ENSMUSG00000025034	conserved gene and region	19	46502503	46503142	640	*	640	53
cg19279211	0.015494531	NA	NA	NA	NA	NA	Pspc1	Pspc1_Exon	14	56771702	56771751	56771750	56771751	50	+	TACGTTGTTAGCAAGAATGCCCCATCACCACATCTTTCCAGAGCCTTTCG	Exon (Pspc1-201/Pspc1, exon 2 of 9)	14	56720710	56778316	57607	2	Pspc1-201	6565	Pspc1-201;Pspc1-202;Pspc1-204	Pspc1;Pspc1;Pspc1	0;0;0	TRUE	FALSE	FALSE	FALSE	FALSE	TRUE	TRUE	FALSE	FALSE	Exon	1	1	66645	ENSMUSG00000021938	conserved gene and region
cg19282146	NA	NA	NA	NA	-1.896054666	NA	Pknox2	Pknox2_Intron	9	37121933	37121982	37121981	37121982	50	+	GCACATAAATTAAAGCGGCCAACTTGTATGCACACATGCACACTGGCACG	Intron (Pknox2-201/Pknox2, intron 1 of 12)	9	36890982	37147407	256426	2	Pknox2-201	25425	Pknox2-201;Pknox2-202;Pknox2-210;Pknox2-209;Pknox2-212;Pknox2-211	Pknox2;Pknox2;Pknox2;Pknox2;Pknox2;Pknox2	0;0;0;0;0;0	TRUE	FALSE	FALSE	FALSE	FALSE	FALSE	TRUE	FALSE	FALSE	Intron	31	47	208076	ENSMUSG00000035934	conserved gene and region
cg19282646	NA	0.304206483	NA	NA	NA	NA	Gm13518	Gm13518_Intergenic_downstream	2	56456270	56456319	56456318	56456319	50	+	TCTTGTATGCTGTCATCCCCTGAGCCTGATAACACAAAATCATTTCCACG	Distal Intergenic	2	56039853	56040085	233	1	Gm13518-201	416417	NA	NA	NA	FALSE	TRUE	FALSE	FALSE	FALSE	FALSE	FALSE	FALSE	TRUE	Intergenic_downstream	37	37	NA	NA	mapped to different genes
cg19291010	-1.0282214	NA	-2.032718931	NA	NA	NA	Bcl9	Bcl9_Exon	3	97215348	97215397	97215396	97215397	50	+	TTGGAATCCAGCTGGGGGTTTCCAGATGGGGACATCACTGTAGGGGGACG	Exon (Bcl9-201/Bcl9, exon 5 of 10)	3	97203662	97227364	23703	2	Bcl9-201	11967	Bcl9-201;Bcl9-207;Bcl9-203;Bcl9-206;Bcl9-204;Bcl9-205;Bcl9-208	Bcl9;Bcl9;Bcl9;Bcl9;Bcl9;Bcl9;Bcl9	0;0;-1339;0;13449;12138;0	TRUE	FALSE	FALSE	FALSE	FALSE	TRUE	FALSE	FALSE	FALSE	Exon	3	10	77578	ENSMUSG00000038256	conserved gene and region
cg19308205	NA	NA	NA	NA	-0.717974785	-0.427624896	Prrc2b	Prrc2b_Exon	2	32183183	32183232	32183183	32183184	50	+	CGCCTGCAAACCTGCCAAGCTTGAAGTCTGAAAACAAAGGAAACGACCCC	Promoter (<=1kb)	2	32183226	32231162	47937	1	Prrc2b-206	0	Prrc2b-201;Prrc2b-202;Prrc2b-206	Prrc2b;Prrc2b;Prrc2b	0;0;0	TRUE	FALSE	TRUE	FALSE	FALSE	TRUE	FALSE	FALSE	FALSE	Exon	5	6	227723	ENSMUSG00000039262	conserved gene and region
cg19323953	0.040382831	NA	NA	NA	NA	NA	Slc35b3	Slc35b3_Intergenic_upstream	13	39297197	39297246	39297245	39297246	50	-	ATGGATGGGATTTCATTTAGTCTGTCTTCTCCCTTTCCAGTTCAGATGCG	Distal Intergenic	13	38932136	38960875	28740	2	Slc35b3-201	-336371	NA	NA	NA	FALSE	TRUE	FALSE	FALSE	FALSE	FALSE	FALSE	FALSE	TRUE	Intergenic_upstream	9	11	108652	ENSMUSG00000021432	mapped to different genes
cg19331623	1.452950836	NA	NA	NA	NA	NA	Tfap2a	Tfap2a_Intron	13	40730627	40730676	40730627	40730628	50	+	CGTTCCTGGAGCCTCCTAATAGCAGATATTCATGACTATTAATATTACAC	Intron (Gm26688-201/Gm26688-201, intron 1 of 2)	13	40715675	40733823	18149	2	Tfap2a-202	3147	Tfap2a-201;Tfap2a-202;Tfap2a-205;Tfap2a-203;Tfap2a-209;Tfap2a-208;Tfap2a-206;Tfap2a-204;Tfap2a-207	Tfap2a;Tfap2a;Tfap2a;Tfap2a;Tfap2a;Tfap2a;Tfap2a;Tfap2a;Tfap2a	0;0;0;0;0;0;0;0;0	TRUE	FALSE	FALSE	FALSE	FALSE	FALSE	TRUE	FALSE	FALSE	Intron	17	57	21418	ENSMUSG00000021359	mapped to different genes	13	40730503	40730628	126	*	126	13
cg19351577	0.182961778	NA	NA	NA	NA	NA	Tcf4	Tcf4_Intron	18	69346892	69346941	69346940	69346941	50	+	CTGTGATCCATTCATTTCTCGCTCTACCTCCTGTTGCATAAAATGATGCG	Intron (Tcf4-259/Tcf4, intron 1 of 6)	18	69343356	69564082	220727	1	Tcf4-259	3536	Tcf4-259;Tcf4-201;Tcf4-207;Tcf4-210;Tcf4-240;Tcf4-254;Tcf4-246;Tcf4-206;Tcf4-202;Tcf4-257;Tcf4-232;Tcf4-215;Tcf4-248;Tcf4-231;Tcf4-205;Tcf4-253;Tcf4-244;Tcf4-233;Tcf4-238;Tcf4-245;Tcf4-249;Tcf4-219;Tcf4-235;Tcf4-227	Tcf4;Tcf4;Tcf4;Tcf4;Tcf4;Tcf4;Tcf4;Tcf4;Tcf4;Tcf4;Tcf4;Tcf4;Tcf4;Tcf4;Tcf4;Tcf4;Tcf4;Tcf4;Tcf4;Tcf4;Tcf4;Tcf4;Tcf4;Tcf4	0;0;0;0;0;0;0;0;0;0;0;0;0;0;0;0;0;0;0;0;0;0;0;0	TRUE	FALSE	FALSE	FALSE	FALSE	FALSE	TRUE	FALSE	FALSE	Intron	42	66	21413	ENSMUSG00000053477	conserved gene but different region
cg19364802	-0.121573889	NA	NA	NA	NA	NA	Bcor	Bcor_Intron	X	12077534	12077583	12077534	12077535	50	-	CGCTAATGAGCTGTGCAGCCCATTGATCCGGAGAACACTTCCTAATTAAC	Intron (Bcor-202/Bcor, intron 1 of 14)	20	12036740	12080553	43814	2	Bcor-202	2970	Bcor-202;Bcor-203;Bcor-204;Bcor-206;Bcor-201;Bcor-207;Bcor-205	Bcor;Bcor;Bcor;Bcor;Bcor;Bcor;Bcor	0;0;0;0;0;0;0	TRUE	FALSE	FALSE	FALSE	FALSE	FALSE	TRUE	FALSE	FALSE	Intron	56	74	71458	ENSMUSG00000040363	conserved gene and region	X	12077216	12077550	335	*	335	28
cg19399365	NA	NA	NA	NA	-0.026204638	-0.515768231	Grem1	Grem1_Promoter	2	113758895	113758944	113758895	113758896	50	-	CGCCTGGAATGCACAGCAAATCACATTTTCCGCTCCCGTTGGAGAGGGAA	Promoter (<=1kb)	2	113746164	113758646	12483	2	Grem1-201	-298	Grem1-201	Grem1	-249	FALSE	TRUE	TRUE	FALSE	FALSE	FALSE	FALSE	FALSE	FALSE	Promoter	4	4	23892	ENSMUSG00000074934	conserved gene but different region	2	113758428	113758970	543	*	543	54
cg19411464	-0.199226016	NA	NA	NA	NA	NA	Srsf11	Srsf11_threeUTR	3	158023344	158023393	158023344	158023345	50	+	CGTGTCGGCTGCTTCACTATAAAGCACACAGAAAAATCAAGATACACAAG	3' UTR	3	158010473	158036639	26167	2	Srsf11-204	13246	Srsf11-204;Srsf11-213;Srsf11-202;Srsf11-207;Srsf11-201;Srsf11-217;Srsf11-218;Srsf11-206;Srsf11-209;Srsf11-210;Srsf11-212;Srsf11-203;Srsf11-208;Srsf11-215	Srsf11;Srsf11;Srsf11;Srsf11;Srsf11;Srsf11;Srsf11;Srsf11;Srsf11;Srsf11;Srsf11;Srsf11;Srsf11;Srsf11	0;0;0;-204;0;-1340;0;0;0;0;0;0;0;0	TRUE	FALSE	FALSE	FALSE	TRUE	TRUE	TRUE	FALSE	FALSE	threeUTR	6	8	69207	ENSMUSG00000055436	conserved gene but different region
cg19442846	NA	NA	-0.274972085	NA	NA	NA	Ostm1	Ostm1_Intron	10	42613814	42613863	42613862	42613863	50	+	CACAATGGGCCTCTTCACTTTTCAGGTTTGGGAGACCTGGGTGACCTACG	Intron (Ostm1-202/Ostm1, intron 2 of 5)	10	42583835	42698323	114489	1	Ostm1-202	29979	Ostm1-202;Ostm1-203	Ostm1;Ostm1	0;0	TRUE	FALSE	FALSE	FALSE	FALSE	FALSE	TRUE	FALSE	FALSE	Intron	21	22	14628	ENSMUSG00000038280	mapped to different genes
cg19458915	-0.013336898	NA	NA	NA	NA	NA	Lmo4	Lmo4_Intron	3	144203990	144204039	144204038	144204039	50	-	ATGAATCAAGAAGACTGACCAGAAACTGACTCCCCTGATAACTAAGGACG	Intron (Lmo4-201/Lmo4, intron 1 of 4)	3	144188530	144205220	16691	2	Lmo4-201	1181	Lmo4-203;Lmo4-201;Lmo4-202;Lmo4-207;Lmo4-208;Lmo4-205;Lmo4-204	Lmo4;Lmo4;Lmo4;Lmo4;Lmo4;Lmo4;Lmo4	0;0;0;0;0;0;0	TRUE	FALSE	FALSE	FALSE	FALSE	FALSE	TRUE	FALSE	FALSE	Intron	13	54	16911	ENSMUSG00000028266	conserved gene and region
cg19482025	NA	NA	-0.266376966	NA	NA	NA	Fli1	Fli1_Promoter	9	32543074	32543123	32543122	32543123	50	-	CCTGTCTGCTTCTCAATCCAGGGGTCTGCTCCGGGGCTCCCCTGGGACCG	Promoter (<=1kb)	9	32428059	32542861	114803	2	Fli1-202	-262	Fli1-201;Fli1-202	Fli1;Fli1	0;0	FALSE	TRUE	TRUE	FALSE	FALSE	FALSE	FALSE	FALSE	FALSE	Promoter	5	15	14247	ENSMUSG00000016087	mapped to different genes
cg19507206	NA	NA	NA	NA	-0.163706986	-0.067331177	Lbx1	Lbx1_Intergenic_upstream	19	45293662	45293711	45293710	45293711	50	-	ATGGTAATTAGGAGGGCCCTCATTACCCTGGCGGAGCCGGCTGAGAGCCG	Distal Intergenic	19	45232684	45235812	3129	2	Lbx1-201	-57899	NA	NA	NA	FALSE	TRUE	FALSE	FALSE	FALSE	FALSE	FALSE	FALSE	TRUE	Intergenic_upstream	15	50	16814	ENSMUSG00000025216	mapped to different genes
cg19510557	NA	NA	-0.006722396	NA	NA	NA	Nog	Nog_Intergenic_downstream	11	89300227	89300276	89300227	89300228	50	-	CGCCCCCAGGGTAGGTGTGAAAGACACGTGTCCCCATTGTGAAGGGCCTG	Distal Intergenic	11	89300638	89302332	1695	2	Nog-201	2105	Nog-201	Nog	0	FALSE	TRUE	FALSE	FALSE	FALSE	FALSE	FALSE	FALSE	TRUE	Intergenic_downstream	16	36	18121	ENSMUSG00000048616	conserved gene and region
cg19604874	NA	NA	NA	NA	0.742383507	NA	Pcdh7	Pcdh7_threeUTR	5	57913162	57913211	57913162	57913163	50	-	CGTAGAGTGACGTTTTCTGTTGTGAGTCAGCCTCAGGACCCACATCAGGG	3' UTR	5	57717967	58133230	415264	1	Pcdh7-203	195195	Pcdh7-203;Pcdh7-202;Pcdh7-205;Pcdh7-206;Pcdh7-207;Pcdh7-204	Pcdh7;Pcdh7;Pcdh7;Pcdh7;Pcdh7;Pcdh7	0;0;0;0;0;0	TRUE	FALSE	FALSE	FALSE	TRUE	TRUE	FALSE	FALSE	FALSE	threeUTR	5	13	54216	ENSMUSG00000029108	conserved gene but different region
cg19615848	NA	0.002405404	NA	NA	0.928339236	0.173287035	Hoxc5	Hoxc5_Exon	15	103009892	103009941	103009940	103009941	50	+	CACAGACCTCAATCGCTCAGGATTTTAGTTCTGAGCAGGGCAGGACTGCG	Exon (Hoxc6-202/Hoxc6, exon 2 of 3)	15	102967443	103015676	48234	1	Hoxc5-202	42449	Hoxc5-202;Hoxc5-201;Hoxc6-202;Hoxc6-203;Hoxc6-201	Hoxc5;Hoxc5;Hoxc6;Hoxc6;Hoxc6	0;0;0;0;0	TRUE	FALSE	FALSE	FALSE	FALSE	TRUE	TRUE	FALSE	FALSE	Exon	72	134	15424	ENSMUSG00000022485	mapped to different genes
cg19673529	-0.04470438	NA	NA	NA	NA	NA	Smad5	Smad5_Exon	13	56727467	56727516	56727515	56727516	50	+	AGTTTAGGAACCTGAGCCACAATGAACCACACATGCCACAAAATGCCACG	Exon (Smad5-201/Smad5, exon 3 of 7)	13	56703010	56742377	39368	1	Smad5-201	24457	Smad5-201;Smad5-206;Smad5-203;Smad5-204;Smad5-202	Smad5;Smad5;Smad5;Smad5;Smad5	0;0;0;0;0	TRUE	FALSE	FALSE	FALSE	FALSE	TRUE	FALSE	FALSE	FALSE	Exon	3	3	17129	ENSMUSG00000021540	conserved gene and region
cg19674753	-0.211287413	NA	NA	NA	NA	NA	Slc6a9	Slc6a9_fiveUTR	4	117835387	117835436	117835435	117835436	50	+	TCGGGAGGCTGATGCAACTTTCCCTTTAAGAAAGCCACCTGGGCGCACCG	Promoter (<=1kb)	4	117835397	117868337	32941	1	Slc6a9-210	0	Slc6a9-202;Slc6a9-208;Slc6a9-201;Slc6a9-207;Slc6a9-210;Slc6a9-206	Slc6a9;Slc6a9;Slc6a9;Slc6a9;Slc6a9;Slc6a9	0;0;0;0;0;0	TRUE	FALSE	TRUE	TRUE	FALSE	TRUE	TRUE	FALSE	FALSE	fiveUTR	5	8	14664	ENSMUSG00000028542	conserved gene and region	4	117835430	117835463	34	*	34	6
cg19676874	NA	NA	NA	NA	-0.016029722	NA	Ostm1	Ostm1_Intron	10	42636447	42636496	42636447	42636448	50	+	CGTGATTGAAGGGTTTTTAACAATTAACATAATCAGAAAATGAGCTGAGA	Intron (Ostm1-202/Ostm1, intron 2 of 5)	10	42583835	42698323	114489	1	Ostm1-202	52612	Ostm1-202;Ostm1-203	Ostm1;Ostm1	0;0	TRUE	FALSE	FALSE	FALSE	FALSE	FALSE	TRUE	FALSE	FALSE	Intron	21	22	14628	ENSMUSG00000038280	conserved gene and region
cg19694311	NA	0.022284697	NA	NA	NA	NA	Cryba4	Cryba4_Intergenic_downstream	5	112098763	112098812	112098811	112098812	50	-	TCATTTTCTGAGGCCTGCAAGTCAGCCAGGAAATAGCTATTATTCCATCG	Distal Intergenic	5	112246494	112251162	4669	2	Cryba4-202	152399	NA	NA	NA	FALSE	TRUE	FALSE	FALSE	FALSE	FALSE	FALSE	FALSE	TRUE	Intergenic_downstream	8	8	12959	ENSMUSG00000066975	mapped to different genes	5	112098700	112098855	156	*	156	13
cg19696052	0.359415196	NA	NA	NA	NA	NA	Dlx1	Dlx1_fiveUTR	2	71529983	71530032	71529983	71529984	50	-	CGCGAGAAGAGATGACCATGACCACCATGCCAGAAAGTCTCAACAGCCCC	5' UTR	2	71528113	71533980	5868	1	Dlx1-201	1870	Dlx1-201;Dlx1-202;Dlx1-205;Dlx1-204;Dlx1-203;Dlx1-206;Metap1d-201;Metap1d-205	Dlx1;Dlx1;Dlx1;Dlx1;Dlx1;Dlx1;Metap1d;Metap1d	0;0;0;0;0;-748;0;0	TRUE	FALSE	FALSE	TRUE	FALSE	TRUE	TRUE	FALSE	FALSE	fiveUTR	12	36	13390	ENSMUSG00000041911	conserved gene and region
cg19705440	NA	-0.062353515	NA	NA	NA	NA	Skor1	Skor1_Promoter	9	63152069	63152118	63152069	63152070	50	+	CGGCAGTTTTCGTCAGTTAATTAGGTTTAATTTACATAATTAGTACAGTA	Promoter (3-4kb)	9	63138170	63148961	10792	2	Skor1-202	-3108	Skor1-202	Skor1	0	FALSE	TRUE	TRUE	FALSE	FALSE	FALSE	FALSE	FALSE	FALSE	Promoter	6	15	207667	ENSMUSG00000022245	conserved gene and region
cg19707231	-0.373674946	NA	NA	NA	NA	NA	Nav1	Nav1_Exon	1	135465846	135465895	135465846	135465847	50	+	CGTGGGGTCTCGGAAGGATCCTGACCGAATCATTCCCTTGGGTCTCTCGG	Exon (Nav1-201/Nav1, exon 10 of 30)	1	135434580	135585355	150776	2	Nav1-201	119460	Nav1-201;Nav1-202;Nav1-208;Nav1-205;Nav1-209;Nav1-206;Nav1-207	Nav1;Nav1;Nav1;Nav1;Nav1;Nav1;Nav1	0;0;0;0;0;0;0	TRUE	FALSE	FALSE	FALSE	FALSE	TRUE	TRUE	FALSE	FALSE	Exon	11	12	215690	ENSMUSG00000009418	mapped to different genes	1	135465776	135465997	222	*	222	16
cg19854621	NA	NA	0.049771802	NA	NA	NA	BC005537	BC005537_Exon	13	24803399	24803448	24803399	24803400	50	-	CGGAAGAAACAAGCTCTGAACAGACTACGTGCTCAGCTTAGAAAGAAAAA	Exon (BC005537-201/BC005537, exon 1 of 5)	13	24801657	24816197	14541	1	BC005537-201	1742	BC005537-201;BC005537-202	BC005537;BC005537	0;0	TRUE	FALSE	FALSE	FALSE	FALSE	TRUE	TRUE	FALSE	FALSE	Exon	4	4	79555	ENSMUSG00000019132	conserved gene and region
cg19923477	-0.292143194	NA	NA	NA	NA	NA	Kiz	Kiz_Intron	2	146958192	146958241	146958240	146958241	50	-	CACTTACTGCAGTCACTCCTTGTGCTTTATTGCTTTTACAAGTGGTCTCG	Intron (Kiz-201/Kiz, intron 12 of 13)	2	146855864	146970097	114234	1	Kiz-201	102328	Kiz-201;Kiz-202	Kiz;Kiz	0;0	TRUE	FALSE	FALSE	FALSE	FALSE	FALSE	TRUE	FALSE	FALSE	Intron	17	29	228730	ENSMUSG00000074749	conserved gene and region
cg19933464	-0.012393707	NA	NA	NA	NA	NA	Gpm6b	Gpm6b_threeUTR	X	166383940	166383989	166383988	166383989	50	+	CATGTCCTATCACCTGTTCATTGTGGCCTGTGCAGGAGCTGGTGCCACCG	3' UTR	20	166238911	166388988	150078	1	Gpm6b-209	145029	Gpm6b-209;Gpm6b-201;Gpm6b-208;Gpm6b-210;Gpm6b-212;Gpm6b-202;Gpm6b-203;Gpm6b-204;Gpm6b-205;Gpm6b-206;Gpm6b-207	Gpm6b;Gpm6b;Gpm6b;Gpm6b;Gpm6b;Gpm6b;Gpm6b;Gpm6b;Gpm6b;Gpm6b;Gpm6b	0;0;0;0;0;0;0;0;0;0;0	TRUE	FALSE	FALSE	FALSE	TRUE	TRUE	FALSE	FALSE	FALSE	threeUTR	1	2	14758	ENSMUSG00000031342	conserved gene but different region
cg19961913	NA	NA	NA	-0.534399338	NA	NA	Hibadh	Hibadh_Intron	6	52584555	52584604	52584555	52584556	50	-	CGTGCCACCCAGCTGCTGCATGGTCACGTCCATCTGGAGCTCTCTAGCTA	Intron (Hibadh-201/Hibadh, intron 4 of 7)	6	52546228	52640389	94162	2	Hibadh-201	55785	Hibadh-201;Hibadh-203	Hibadh;Hibadh	0;0	TRUE	FALSE	FALSE	FALSE	FALSE	FALSE	TRUE	FALSE	FALSE	Intron	11	13	58875	ENSMUSG00000029776	conserved gene and region
cg19964527	NA	0.134645218	NA	NA	NA	NA	Hoxc4	Hoxc4_threeUTR	15	103035744	103035793	103035744	103035745	50	-	CGAAGGAGAAGGATCGAGATCGCCCACTCGCTGTGCCTCTCTGAGAGGCA	3' UTR	15	103018934	103036405	17472	1	Hoxc4-202	16810	Hoxc4-202;Hoxc4-201	Hoxc4;Hoxc4	0;0	TRUE	FALSE	FALSE	FALSE	TRUE	TRUE	FALSE	FALSE	FALSE	threeUTR	17	91	15423	ENSMUSG00000075394	conserved gene but different region
cg19981759	NA	NA	NA	NA	0.003022049	NA	Zic1	Zic1_fiveUTR	9	91365750	91365799	91365750	91365751	50	-	CGGTGAGCGCGAGACTGATAGCAGCAATCATTCCTGCAGATAAATGAATT	Promoter (<=1kb)	9	91358058	91365768	7711	2	Zic1-201	0	Zic1-201;Zic1-202;Zic1-203;Zic4-208;Zic4-206;Zic4-207;Zic4-211;Zic4-204;Zic4-203	Zic1;Zic1;Zic1;Zic4;Zic4;Zic4;Zic4;Zic4;Zic4	0;0;-2696;0;0;0;0;0;0	TRUE	FALSE	TRUE	TRUE	FALSE	TRUE	TRUE	FALSE	FALSE	fiveUTR	4	10	22771	ENSMUSG00000032368	mapped to different genes
cg19993539	-0.111577072	NA	NA	NA	NA	NA	Mxi1	Mxi1_Exon	19	53370310	53370359	53370358	53370359	50	+	ATGGACAGCATTGGATCAACTATTTCTTCAGATCGTTCTGATTCAGAGCG	Exon (Mxi1-201/Mxi1, exon 5 of 6)	19	53310518	53373293	62776	1	Mxi1-201	59792	Gm10197-201;Mxi1-201;Mxi1-208;Mxi1-203;Mxi1-202;Mxi1-205;Mxi1-206;Mxi1-204;Mxi1-207	Gm10197;Mxi1;Mxi1;Mxi1;Mxi1;Mxi1;Mxi1;Mxi1;Mxi1	1407;0;0;0;0;0;0;0;0	TRUE	FALSE	FALSE	FALSE	FALSE	TRUE	FALSE	FALSE	FALSE	Exon	6	10	17859	ENSMUSG00000025025	conserved gene but different region
cg20002283	-1.161622024	NA	NA	NA	NA	NA	Kctd1	Kctd1_Intron	18	15063641	15063690	15063689	15063690	50	-	AATGACCTTCAGCTACCGGGAGGCAAAGCCGGGCTCTTAAAGGAGCCGCG	Intron (Kctd1-201/Kctd1, intron 1 of 4)	18	14968685	15151446	182762	2	Kctd1-201	87756	Kctd1-201;Kctd1-202;Kctd1-206;Kctd1-205	Kctd1;Kctd1;Kctd1;Kctd1	0;0;0;-1752	TRUE	FALSE	FALSE	FALSE	FALSE	FALSE	TRUE	FALSE	FALSE	Intron	7	24	106931	ENSMUSG00000036225	conserved gene and region	18	15063315	15063752	438	*	438	43
cg20012467	NA	NA	NA	0.152144488	NA	NA	Dll4	Dll4_Promoter	2	119322243	119322292	119322291	119322292	50	+	AGGCGGGCGGGAAGCTGCTGCATTAAATTGTAAAATCGATTTATTGACCG	Promoter (3-4kb)	2	119325784	119335962	10179	1	Dll4-201	-3492	Dll4-201	Dll4	0	TRUE	FALSE	TRUE	FALSE	FALSE	FALSE	TRUE	FALSE	FALSE	Promoter	8	20	54485	ENSMUSG00000027314	conserved gene and region	2	119322082	119322448	367	*	367	37
cg20025626	NA	NA	NA	NA	0.111618069	NA	Tfap2a	Tfap2a_Intergenic_downstream	13	40709203	40709252	40709251	40709252	50	+	TTTGGCCCGGGGCGACACTTCCCCCCGGCTGAGCTTAGAGAATGGGAGCG	Distal Intergenic	13	40716724	40728944	12221	2	Tfap2a-209	19692	NA	NA	NA	FALSE	TRUE	FALSE	FALSE	FALSE	FALSE	FALSE	FALSE	TRUE	Intergenic_downstream	15	57	21418	ENSMUSG00000021359	mapped to different genes	13	40709088	40709361	274	*	274	22
cg20031917	NA	NA	NA	0.213044913	NA	NA	Nfib	Nfib_threeUTR	4	82290345	82290394	82290393	82290394	50	-	GTTCATTTGCAACCCACAAAAAGTACCCAAAGAACGTTATCCTCCAACCG	3' UTR	4	82290173	82505308	215136	2	Nfib-201	214914	Nfib-201;Nfib-203;Nfib-202	Nfib;Nfib;Nfib	0;0;0	TRUE	FALSE	FALSE	FALSE	TRUE	TRUE	FALSE	FALSE	FALSE	threeUTR	11	66	18028	ENSMUSG00000008575	conserved gene and region
cg20117682	NA	NA	NA	NA	0.511744366	NA	Sp8	Sp8_Promoter	12	118843996	118844045	118843996	118843997	50	-	CGACATGGATGAGACAGATGATATGATTAAGGGGCTGTGGTCGTTTTAAT	Promoter (2-3kb)	12	118846329	118852576	6248	1	Sp8-201	-2333	Sp8-201;Sp8-202	Sp8;Sp8	0;-3541	FALSE	TRUE	TRUE	FALSE	FALSE	FALSE	FALSE	FALSE	FALSE	Promoter	27	29	320145	ENSMUSG00000048562	conserved gene and region
cg20128261	NA	NA	NA	NA	-0.737710358	NA	Smtn	Smtn_Exon	11	3520815	3520864	3520863	3520864	50	+	CGGTAGAATTCCTGGATGTACGTGTACACGCACTTCCAGTCAGGCTCTCG	Exon (Smtn-201/Smtn, exon 8 of 9)	11	3517523	3527937	10415	2	Smtn-201	7073	Selenom-202;Selenom-203;Selenom-201;Smtn-201;Smtn-204;Smtn-203;Smtn-208;Smtn-202;Smtn-210;Smtn-206	Selenom;Selenom;Selenom;Smtn;Smtn;Smtn;Smtn;Smtn;Smtn;Smtn	6131;6113;5948;0;0;0;0;0;0;0	TRUE	FALSE	FALSE	FALSE	FALSE	TRUE	TRUE	FALSE	FALSE	Exon	4	6	29856	ENSMUSG00000020439	conserved gene and region
cg20128948	0.110964476	NA	NA	NA	NA	NA	Hoxc5	Hoxc5_Exon	15	103009674	103009723	103009674	103009675	50	+	CGTCGCCCTCAATTCCACCGCCTATGATCCAGTGAGGCATTTCTCGACCT	Exon (Hoxc6-202/Hoxc6, exon 2 of 3)	15	102967443	103015676	48234	1	Hoxc5-202	42231	Hoxc5-202;Hoxc5-201;Hoxc6-202;Hoxc6-203;Hoxc6-201	Hoxc5;Hoxc5;Hoxc6;Hoxc6;Hoxc6	0;0;0;0;0	TRUE	FALSE	FALSE	FALSE	FALSE	TRUE	TRUE	FALSE	FALSE	Exon	72	134	15424	ENSMUSG00000022485	mapped to different genes	15	103009647	103009812	166	*	166	14
cg20149183	NA	NA	0.302471163	NA	NA	NA	Otp	Otp_Promoter	13	94875488	94875537	94875488	94875489	50	-	CGGAGTGGGGGACTCTCCGGGCGCTGACATTTGCAGGCTGCCCTCCTGAT	Promoter (<=1kb)	13	94875602	94885130	9529	1	Otp-201	-114	Otp-201	Otp	0	FALSE	TRUE	TRUE	FALSE	FALSE	FALSE	FALSE	FALSE	FALSE	Promoter	27	34	18420	ENSMUSG00000021685	conserved gene but different region	13	94875299	94875591	293	*	293	22
cg20168281	NA	NA	NA	NA	1.019385911	NA	Evx1	Evx1_Exon	6	52314189	52314238	52314237	52314238	50	-	CGAGTCGGATTTCTATGAAGAAATCGAGGTGAGCTGCACCCCGGACTGCG	Promoter (<=1kb)	6	52313498	52318378	4881	1	Evx1-201	691	Evx1-201;Evx1-202	Evx1;Evx1	0;0	TRUE	FALSE	TRUE	FALSE	FALSE	TRUE	TRUE	FALSE	FALSE	Exon	4	19	14028	ENSMUSG00000005503	mapped to different genes
cg20212950	-0.399690085	NA	NA	NA	NA	NA	Qk	Qk_threeUTR	17	10213364	10213413	10213412	10213413	50	-	TCTGCGGTCACAATCCTTTGGTAAGGATGGACACGCATATCGTGCCTTCG	3' UTR	17	10202601	10319380	116780	2	Qk-204	105967	Qk-204;Qk-202;Qk-203;Qk-201;Qk-206;Qk-205	Qk;Qk;Qk;Qk;Qk;Qk	0;0;0;0;0;0	TRUE	FALSE	FALSE	FALSE	TRUE	TRUE	FALSE	FALSE	FALSE	threeUTR	12	17	19317	ENSMUSG00000062078	conserved gene and region
cg20257626	NA	-0.010633292	NA	NA	NA	NA	Fam49a	Fam49a_Intergenic_downstream	12	12401520	12401569	12401568	12401569	50	+	GTCTATAAACAGAAGCAGGTTTTCTGTGATACGTTACCCCGATAAACCCG	Distal Intergenic	12	12262189	12343432	81244	1	Fam49a-204	139331	NA	NA	NA	FALSE	TRUE	FALSE	FALSE	FALSE	FALSE	FALSE	FALSE	TRUE	Intergenic_downstream	2	2	76820	ENSMUSG00000020589	conserved gene and region
cg20267980	NA	NA	0.148721828	NA	NA	NA	Cnot1	Cnot1_threeUTR	8	95728610	95728659	95728658	95728659	50	+	CACACCTTCTGCTGTGGCGTATGTGCCAGCATTCTTGCAATAAATATCCG	3' UTR	8	95719451	95807462	88012	2	Cnot1-202	78803	Cnot1-202;Cnot1-201;Cnot1-203;Cnot1-208;Cnot1-216;Cnot1-211;Cnot1-212;Cnot1-213	Cnot1;Cnot1;Cnot1;Cnot1;Cnot1;Cnot1;Cnot1;Cnot1	0;0;0;0;0;0;0;4077	TRUE	FALSE	FALSE	FALSE	TRUE	TRUE	TRUE	FALSE	FALSE	threeUTR	8	24	234594	ENSMUSG00000036550	conserved gene but different region
cg20315951	NA	NA	NA	NA	0.63927328	NA	Ovol1	Ovol1_Promoter	19	5560740	5560789	5560740	5560741	50	+	CGTTGGGAAATAACGGTGACAACCCACCTATTTGTTACCTGTCGAACCGG	Promoter (<=1kb)	19	5549136	5560646	11511	2	Ovol1-201	-94	Ovol1-201;Ovol1-202	Ovol1;Ovol1	-94;-1337	TRUE	FALSE	TRUE	FALSE	FALSE	FALSE	TRUE	FALSE	FALSE	Promoter	2	2	18426	ENSMUSG00000024922	conserved gene and region	19	5560720	5561128	409	*	409	45
cg20367539	NA	NA	0.747465413	NA	NA	NA	Xpo1	Xpo1_fiveUTR	11	23261832	23261881	23261880	23261881	50	-	CAGTAATCTATGCCAGCAATTATGACAATGTTAGCAGACCATGCAGCTCG	5' UTR	11	23256041	23297597	41557	1	Xpo1-201	5791	Xpo1-201;Xpo1-204;Xpo1-203;Xpo1-206;Xpo1-202;Xpo1-205	Xpo1;Xpo1;Xpo1;Xpo1;Xpo1;Xpo1	0;0;0;0;0;0	TRUE	FALSE	FALSE	TRUE	FALSE	TRUE	TRUE	FALSE	FALSE	fiveUTR	2	14	103573	ENSMUSG00000020290	conserved gene but different region
cg20369280	-0.185106746	NA	NA	NA	NA	NA	BC052040	BC052040_Intron	2	115643920	115643969	115643920	115643921	50	+	CGCAGCAGCACCGCCATTTGTCAAAGTCAACCTTCTGATTGCTTTGGACC	Intron (BC052040-203/BC052040, intron 5 of 10)	2	115581716	115778768	197053	1	BC052040-203	62204	BC052040-203;BC052040-201;BC052040-202	BC052040;BC052040;BC052040	0;0;0	TRUE	FALSE	FALSE	FALSE	FALSE	FALSE	TRUE	FALSE	FALSE	Intron	37	49	399568	ENSMUSG00000040282	conserved gene and region
cg20375718	NA	0.366177365	NA	NA	NA	NA	Nav1	Nav1_Exon	1	135460703	135460752	135460703	135460704	50	+	CGTCTCTGCCAGGTGTCGCAGGCGGGATGTCATATTCACCAGGCTCTGCT	Exon (Nav1-201/Nav1, exon 14 of 30)	1	135434580	135585355	150776	2	Nav1-201	124603	Nav1-201;Nav1-202;Nav1-208;Nav1-205;Nav1-209;Nav1-206;Nav1-207	Nav1;Nav1;Nav1;Nav1;Nav1;Nav1;Nav1	0;0;0;0;0;0;0	TRUE	FALSE	FALSE	FALSE	FALSE	TRUE	FALSE	FALSE	FALSE	Exon	11	12	215690	ENSMUSG00000009418	mapped to different genes	1	135460699	135460813	115	*	115	9
cg20376497	NA	NA	NA	NA	0.480611	NA	Nr2f1	Nr2f1_Exon	13	78181314	78181363	78181314	78181315	50	+	CGCCGGCGCCCAGGATAAGCCAGTGGGGTGATAATTAATGGAATACAATA	Exon (3110006O06Rik-201/3110006O06Rik-201, exon 2 of 2)	13	78189872	78190443	572	2	Nr2f1-204	9080	NA	NA	NA	TRUE	FALSE	FALSE	FALSE	FALSE	TRUE	TRUE	FALSE	FALSE	Exon	25	55	13865	ENSMUSG00000069171	conserved gene and region	13	78181019	78181341	323	*	323	26
cg20377527	NA	-0.171369438	NA	NA	NA	NA	Gm14006	Gm14006_Intron	2	128377864	128377913	128377864	128377865	50	-	CGAAACTGAATGTGGGTTGTGAAAGAACATTAAAATGAAGAAAATTTCCC	Intron (Morrbid-211/Morrbid-211, intron 1 of 6)	2	128557254	128558234	981	2	Gm14006-201	180370	NA	NA	NA	TRUE	FALSE	FALSE	FALSE	FALSE	FALSE	TRUE	FALSE	FALSE	Intron	2	2	383791	NA	mapped to different genes
cg20382695	-0.019719594	NA	NA	NA	NA	NA	Atrnl1	Atrnl1_Exon	19	57611607	57611656	57611655	57611656	50	+	TGGGGGACCAGTGCCAGCACTGCCAGGGCAGGTTCAAGTAAGTGCCTTCG	Promoter (<=1kb)	19	57611034	58133343	522310	1	Atrnl1-201	573	Atrnl1-201	Atrnl1	0	TRUE	FALSE	TRUE	FALSE	FALSE	TRUE	TRUE	FALSE	FALSE	Exon	3	3	226255	ENSMUSG00000054843	conserved gene but different region	19	57611655	57611918	264	*	264	20
cg20421508	-0.051885952	NA	NA	NA	NA	NA	Otp	Otp_Promoter	13	94869079	94869128	94869127	94869128	50	-	TAATCGAGCCCACATGGAGGGCAGCAGCACTAATTACGGCGGGGGATGCG	Promoter (6-7kb)	13	94875602	94885130	9529	1	Otp-201	-6523	NA	NA	NA	FALSE	TRUE	TRUE	FALSE	FALSE	FALSE	FALSE	FALSE	FALSE	Promoter	27	34	18420	ENSMUSG00000021685	conserved gene and region	13	94869063	94869234	172	*	172	30
cg20426932	-0.109910079	NA	NA	NA	NA	NA	Irx4	Irx4_Intergenic_downstream	13	73272082	73272131	73272082	73272083	50	-	CGTTACTTTTCATTAAGCGAGTCTGACAGCAGCATATTCAGGCTCGACAA	Downstream (2-3kb)	13	73260497	73269608	9112	1	Irx4-201	11634	Irx4-202;Irx4-201	Irx4;Irx4	0;0	FALSE	TRUE	FALSE	FALSE	FALSE	FALSE	FALSE	FALSE	FALSE	Intergenic_downstream	6	7	50916	ENSMUSG00000021604	conserved gene and region	13	73271779	73272166	388	*	388	36
cg20432233	NA	0.059596339	NA	NA	NA	NA	Gm11892	Gm11892_Intergenic_upstream	4	23983698	23983747	23983698	23983699	50	+	CGAGCCCAAAAGCGTGAAAGCTCCTTATAGGCTGCAGGATGTGGATGTGA	Distal Intergenic	4	24238100	24239301	1202	1	Gm11892-201	-254353	NA	NA	NA	FALSE	TRUE	FALSE	FALSE	FALSE	FALSE	FALSE	FALSE	TRUE	Intergenic_upstream	16	16	664973	NA	mapped to different genes
cg20462566	NA	NA	NA	NA	0.213252259	NA	Mtx1	Mtx1_Exon	3	89216833	89216882	89216833	89216834	50	-	CGCCAAGACAACACTCGATGGCTGGAGGCCTCTGTTGTAGGCAAGATCAA	Exon (Thbs3-201/Thbs3, exon 2 of 23)	3	89209356	89227052	17697	2	Mtx1-216	10170	Mtx1-219;Mtx1-201;Mtx1-202;Mtx1-203;Mtx1-214;Mtx1-215;Mtx1-216;Mtx1-210;Mtx1-212;Mtx1-211;Mtx1-209;Mtx1-208;Thbs3-201;Thbs3-207;Thbs3-203;Thbs3-202;Thbs3-209;Thbs3-205	Mtx1;Mtx1;Mtx1;Mtx1;Mtx1;Mtx1;Mtx1;Mtx1;Mtx1;Mtx1;Mtx1;Mtx1;Thbs3;Thbs3;Thbs3;Thbs3;Thbs3;Thbs3	-2498;-2403;-2476;-2926;-2993;-2921;0;-2971;-2948;-2956;-3444;-3007;0;0;0;0;-538;-4270	TRUE	FALSE	FALSE	FALSE	FALSE	TRUE	TRUE	FALSE	FALSE	Exon	1	1	17827	ENSMUSG00000064068	mapped to different genes
cg20463887	-0.078373184	NA	-0.414138871	-0.190309322	NA	NA	Nr2f2	Nr2f2_Intergenic_downstream	7	70346587	70346636	70346587	70346588	50	-	CGAAGTACAGAGACATCTCAATGAAATTTCCAAAGAAGAAAGAGAAATCA	Distal Intergenic	7	70353074	70355237	2164	2	Nr2f2-203	8650	NA	NA	NA	FALSE	TRUE	FALSE	FALSE	FALSE	FALSE	FALSE	FALSE	TRUE	Intergenic_downstream	19	69	11819	ENSMUSG00000030551	mapped to different genes
cg20477718	NA	NA	NA	NA	0.793371911	NA	Twist1	Twist1_Exon	12	33958496	33958545	33958544	33958545	50	+	CTCCAAGATGGCAAGCTGCAGCTATGTGGCTCACGAGCGGCTCAGCTACG	Promoter (<=1kb)	12	33957671	33959829	2159	1	Twist1-201	825	Twist1-201	Twist1	0	TRUE	FALSE	TRUE	FALSE	FALSE	TRUE	FALSE	FALSE	FALSE	Exon	2	7	22160	ENSMUSG00000035799	conserved gene and region	12	33958529	33958782	254	*	254	18
cg20504623	NA	NA	NA	NA	-0.131569596	NA	Scube3	Scube3_Exon	17	28166015	28166064	28166015	28166016	50	+	CGGCCAGACGGAGCAGTGTGTGCCATGCCCAGCGGGCACCTTCCAGGAGA	Exon (Scube3-201/Scube3, exon 16 of 22)	17	28142141	28174854	32714	1	Scube3-201	23874	Scube3-201;Scube3-207;Scube3-202;Scube3-203;Scube3-206;Scube3-205;Scube3-204	Scube3;Scube3;Scube3;Scube3;Scube3;Scube3;Scube3	0;0;0;0;7141;0;0	TRUE	FALSE	FALSE	FALSE	FALSE	TRUE	TRUE	FALSE	FALSE	Exon	6	7	268935	ENSMUSG00000038677	conserved gene and region	17	28165967	28166085	119	*	119	9
cg20557137	NA	NA	NA	NA	NA	0.094585438	Gm19311	Gm19311_Exon	14	81685886	81685935	81685934	81685935	50	+	TGGTCATTTCATCAATTCAGTTGAGTACCATTGGGATTTGGATAACACCG	Exon (Gm41219-201/Gm41219-201, exon 1 of 2)	14	81703206	81703671	466	2	Gm19311-201	17736	NA	NA	NA	TRUE	FALSE	FALSE	FALSE	FALSE	TRUE	FALSE	FALSE	FALSE	Exon	3	3	100502666	NA	mapped to different genes
cg20588435	NA	NA	NA	0.218666159	NA	NA	Foxd2	Foxd2_Intergenic_downstream	4	114903590	114903639	114903590	114903591	50	+	CGCTGGATGAAAAGGAATGAAATTGAACGAAATTGAACGAAATGAAGTGA	Downstream (2-3kb)	4	114906282	114908873	2592	2	Foxd2-201	5234	Foxd2-201	Foxd2	0	FALSE	TRUE	FALSE	FALSE	FALSE	FALSE	FALSE	FALSE	FALSE	Intergenic_downstream	2	3	17301	ENSMUSG00000055210	conserved gene and region	4	114903546	114903692	147	*	147	11
cg20607831	NA	NA	-0.448556265	NA	NA	NA	Tbc1d22a	Tbc1d22a_Intron	15	86494733	86494782	86494733	86494734	50	+	CGAGGTCATGATAATATGAAGCGAAGTGGATTAAAAATAAAACCAAAGGT	Intron (Tbc1d22a-201/Tbc1d22a, intron 12 of 12)	15	86214459	86498503	284045	1	Tbc1d22a-201	280274	Tbc1d22a-201	Tbc1d22a	0	TRUE	FALSE	FALSE	FALSE	FALSE	FALSE	TRUE	FALSE	FALSE	Intron	3	3	223754	ENSMUSG00000051864	conserved gene and region
cg20635820	NA	NA	0.102443183	NA	NA	NA	Crebzf	Crebzf_threeUTR	7	90445452	90445501	90445452	90445453	50	+	CGGGACCAGCTGCTGGCCACATTTCCTGCTTTATTTTAAAAGGTAGTATA	3' UTR	7	90442729	90446104	3376	1	Crebzf-201	2723	Crebzf-201;Crebzf-203;Crebzf-204;Crebzf-205;Crebzf-202;Crebzf-208;Crebzf-207;Crebzf-209;Crebzf-206	Crebzf;Crebzf;Crebzf;Crebzf;Crebzf;Crebzf;Crebzf;Crebzf;Crebzf	0;0;0;0;0;0;0;0;0	TRUE	FALSE	FALSE	FALSE	TRUE	TRUE	TRUE	FALSE	FALSE	threeUTR	6	9	233490	ENSMUSG00000051451	conserved gene and region
cg20644522	NA	NA	NA	NA	NA	0.26136868	Pax6	Pax6_Intron	2	105686862	105686911	105686862	105686863	50	+	CGAAATATCTGGTACAAAGGATGCTTCTGTCACTCGCAAGAATTTGTTAT	Intron (Pax6-206/Pax6, intron 7 of 12)	2	105668900	105697364	28465	1	Pax6-206	17962	Pax6-206;Pax6-207;Pax6-210;Pax6-214;Pax6-208;Pax6-202;Pax6-205;Pax6-225;Pax6-204;Pax6-201;Pax6-203;Pax6-224;Pax6-219;Pax6-221;Pax6-213;Pax6-211;Pax6-222;Pax6-212;Pax6-215;Pax6-223;Pax6-209;Pax6-216	Pax6;Pax6;Pax6;Pax6;Pax6;Pax6;Pax6;Pax6;Pax6;Pax6;Pax6;Pax6;Pax6;Pax6;Pax6;Pax6;Pax6;Pax6;Pax6;Pax6;Pax6;Pax6	0;0;0;0;0;0;0;0;0;0;0;0;0;0;0;0;0;0;0;0;0;0	TRUE	FALSE	FALSE	FALSE	FALSE	FALSE	TRUE	FALSE	FALSE	Intron	22	78	18508	ENSMUSG00000027168	conserved gene and region	2	105686550	105686863	314	*	314	18
cg20665157.1	NA	NA	NA	NA	-0.039141788	NA	Cadps2	Cadps2_Intron	6	23273232	23273281	23273280	23273281	50	-	TGTCAATAGAAATTGACAAACCTCATCTCCTAAATAGTGCAGCTGAGCCG	Intron (Cadps2-213/Cadps2, intron 28 of 29)	6	23262773	23839137	576365	2	Cadps2-213	565856	Cadps2-213;Cadps2-205;Cadps2-212;Cadps2-201;Cadps2-209;Cadps2-206;Cadps2-211;Cadps2-207;Cadps2-202;Cadps2-210	Cadps2;Cadps2;Cadps2;Cadps2;Cadps2;Cadps2;Cadps2;Cadps2;Cadps2;Cadps2	0;0;0;0;0;0;0;0;0;0	TRUE	FALSE	FALSE	FALSE	FALSE	FALSE	TRUE	FALSE	FALSE	Intron	13	15	320405	ENSMUSG00000017978	conserved gene and region
cg20668096	NA	0.127221291	NA	NA	NA	NA	Lrba	Lrba_Intron	3	86551296	86551345	86551344	86551345	50	-	CCACTTCAAGTCTTCAGACCGATTCATCTGTATTCTCTTGTTATAATCCG	Intron (Lrba-202/Lrba, intron 40 of 50)	3	86224680	86746712	522033	1	Lrba-202	326616	Lrba-202;Lrba-204;Lrba-201;Lrba-203;Lrba-205;Lrba-206;Mab21l2-201;Mab21l2-202	Lrba;Lrba;Lrba;Lrba;Lrba;Lrba;Mab21l2;Mab21l2	0;0;0;0;0;0;0;0	TRUE	FALSE	FALSE	FALSE	FALSE	FALSE	TRUE	FALSE	FALSE	Intron	23	45	80877	ENSMUSG00000028080	conserved gene and region
cg20682781	NA	NA	NA	NA	-0.80627342	NA	Pax2	Pax2_Intergenic_upstream	19	44671350	44671399	44671398	44671399	50	+	GATAAATAATAACTTACAAACAGGATTAGTTGTAAAGTCACGCTCCGGCG	Distal Intergenic	19	44756045	44837851	81807	1	Pax2-203	-84646	NA	NA	NA	FALSE	TRUE	FALSE	FALSE	FALSE	FALSE	FALSE	FALSE	TRUE	Intergenic_upstream	101	166	18504	ENSMUSG00000004231	conserved gene and region	19	44671390	44671489	100	*	100	13
cg20682817	-0.042969978	NA	NA	NA	NA	NA	Bcor	Bcor_Exon	X	12136925	12136974	12136973	12136974	50	-	GGCAGTTGCAATCAGTTTCCGAAAGGTCAGCCAAGGTCCTCCGGCTCTCG	Exon (Bcor-208/Bcor, exon 3 of 5)	20	12036743	12160355	123613	2	Bcor-201	23381	Bcor-201;Bcor-208	Bcor;Bcor	0;0	TRUE	FALSE	FALSE	FALSE	FALSE	TRUE	TRUE	FALSE	FALSE	Exon	14	74	71458	ENSMUSG00000040363	conserved gene but different region	X	12136836	12137187	352	*	352	27
cg20696319	NA	NA	NA	NA	NA	-0.14457633	Fign	Fign_Intron	2	64079927	64079976	64079927	64079928	50	+	CGTCTCTCAGTATAGCGACAGACAGCTGCTTCCACTTTCTAATGTGCCCT	Intron (Fign-203/Fign, intron 2 of 2)	2	63971507	64098012	126506	2	Fign-203	18036	Fign-203;Fign-201;Fign-202;Fign-204	Fign;Fign;Fign;Fign	0;0;0;0	TRUE	FALSE	FALSE	FALSE	FALSE	FALSE	TRUE	FALSE	FALSE	Intron	22	84	60344	ENSMUSG00000075324	conserved gene and region
cg20718192	0.179452085	NA	NA	NA	NA	NA	Unc79	Unc79_Intron	12	102949933	102949982	102949933	102949934	50	-	CGGCAAATCAGGGGCGGGGAACTGTCAGTTGCAACCAAAGCCTGCCTGGC	Intron (Unc79-202/Unc79, intron 1 of 48)	12	102948859	103184001	235143	1	Unc79-202	1074	Unc79-202;Unc79-208	Unc79;Unc79	0;0	TRUE	FALSE	FALSE	FALSE	FALSE	FALSE	TRUE	FALSE	FALSE	Intron	1	24	217843	ENSMUSG00000021198	conserved gene and region
cg20719273	NA	NA	NA	NA	-0.039574255	NA	Prr29	Prr29_fiveUTR	11	106365599	106365648	106365599	106365600	50	-	CGCTGATGTCACAGGGTCATGAGTGAAACCTGAGGACTGGGCCAATCTTC	Promoter (<=1kb)	11	106365472	106377114	11643	1	Prr29-201	127	Prr29-201	Prr29	0	TRUE	FALSE	TRUE	TRUE	FALSE	TRUE	FALSE	FALSE	FALSE	fiveUTR	2	2	75573	ENSMUSG00000009210	conserved gene but different region
cg20726505	-0.052730758	NA	NA	NA	NA	NA	Lhfpl3	Lhfpl3_Exon	5	22746219	22746268	22746219	22746220	50	-	CGCGATGCTCCCGGCTCAGGAGGCTGCCAAGCTGTACCACACCAACTATG	Promoter (<=1kb)	5	22746059	23275597	529539	1	Lhfpl3-202	160	Lhfpl3-202	Lhfpl3	0	TRUE	FALSE	TRUE	FALSE	FALSE	TRUE	TRUE	FALSE	FALSE	Exon	11	11	269629	ENSMUSG00000106379	conserved gene but different region	5	22745857	22746231	375	*	375	33
cg20735499	-0.414160563	NA	NA	NA	NA	NA	Fign	Fign_Promoter	2	64099046	64099095	64099046	64099047	50	+	CGGAACATAAGGTTTAAGAAACACACACACGTTTTCTGGGGTCTCTTGTT	Promoter (1-2kb)	2	63977337	64098038	120702	2	Fign-201	-1008	Fign-203;Fign-201;Fign-202;Fign-204	Fign;Fign;Fign;Fign	0;0;0;0	FALSE	TRUE	TRUE	FALSE	FALSE	FALSE	FALSE	FALSE	FALSE	Promoter	12	84	60344	ENSMUSG00000075324	conserved gene and region
cg20766695	NA	NA	NA	NA	1.36849171	NA	Pax5	Pax5_fiveUTR	4	44703371	44703420	44703419	44703420	50	+	TATGCATGGATGCAAACGGGTCGTGCTTACAGTGTATTTCCATCGGGGCG	Promoter (<=1kb)	4	44679454	44703413	23960	2	Pax5-216	0	Pax5-201;Pax5-202;Pax5-203;Pax5-204;Pax5-205;Pax5-207;Pax5-206;Pax5-209;Pax5-210;Pax5-212;Pax5-213;Pax5-214;Pax5-215;Pax5-208;Pax5-216;Pax5-217;Pax5-218;Pax5-219	Pax5;Pax5;Pax5;Pax5;Pax5;Pax5;Pax5;Pax5;Pax5;Pax5;Pax5;Pax5;Pax5;Pax5;Pax5;Pax5;Pax5;Pax5	0;0;0;0;0;0;0;0;0;0;0;0;0;0;0;0;0;0	TRUE	FALSE	TRUE	TRUE	FALSE	TRUE	TRUE	FALSE	FALSE	fiveUTR	3	45	18507	ENSMUSG00000014030	conserved gene but different region	4	44703085	44703505	421	*	421	37
cg20771405	-0.001535133	NA	NA	NA	NA	NA	Ptch1	Ptch1_Intron	13	63566290	63566339	63566290	63566291	50	-	CGAAAGAGAAAAAGGCTGGAGCTCCCGCCCCCGGGGCTGTCAGATGGCTT	Intron (Ptch1-204/Ptch1, intron 1 of 23)	13	63508329	63573460	65132	2	Ptch1-204	7121	Ptch1-201;Ptch1-204;Ptch1-206;Ptch1-202;Ptch1-207;Ptch1-203;Ptch1-205	Ptch1;Ptch1;Ptch1;Ptch1;Ptch1;Ptch1;Ptch1	0;0;0;0;0;0;0	TRUE	FALSE	FALSE	FALSE	FALSE	FALSE	TRUE	FALSE	FALSE	Intron	22	36	19206	ENSMUSG00000021466	conserved gene and region
cg20851152	NA	NA	NA	NA	0.118107737	0.169785381	Gm47084	Gm47084_Intergenic_upstream	10	91501691	91501740	91501691	91501692	50	-	CGAGGTAATTTTCCAAAGCCGATTTTCTTAGTGTTCAGCAAAGTGGAATG	Distal Intergenic	10	91448221	91448380	160	2	Gm47084-201	-53360	NA	NA	NA	FALSE	TRUE	FALSE	FALSE	FALSE	FALSE	FALSE	FALSE	TRUE	Intergenic_upstream	2	2	NA	NA	mapped to different genes
cg20865948	-0.172969088	NA	NA	NA	NA	NA	Akap10	Akap10_Exon	11	61903962	61904011	61904010	61904011	50	+	GTTCCACTGGTCAGCACTTCAATCTGGTATTTACAGAAATGGTGACTTCG	Exon (Akap10-202/Akap10, exon 7 of 15)	11	61871307	61930252	58946	2	Akap10-202	26241	Akap10-202;Akap10-201;Akap10-203	Akap10;Akap10;Akap10	0;0;0	TRUE	FALSE	FALSE	FALSE	FALSE	TRUE	FALSE	FALSE	FALSE	Exon	1	2	56697	ENSMUSG00000047804	conserved gene but different region
cg20960545	0.033418551	NA	NA	NA	NA	NA	Slc44a2	Slc44a2_Exon	9	21353036	21353085	21353036	21353037	50	-	CGACCCTACTTCATGTCGCCCGAGCTGAGAGACATCCTGTTGAAGGGGAG	Exon (Slc44a2-205/Slc44a2, exon 6 of 7)	9	21320698	21355028	34331	1	Slc44a2-210	32338	Slc44a2-210;Slc44a2-207;Slc44a2-201;Slc44a2-202;Slc44a2-209;Slc44a2-205;Slc44a2-203	Slc44a2;Slc44a2;Slc44a2;Slc44a2;Slc44a2;Slc44a2;Slc44a2	0;0;0;8154;6052;0;0	TRUE	FALSE	FALSE	FALSE	FALSE	TRUE	TRUE	FALSE	FALSE	Exon	3	3	68682	ENSMUSG00000057193	conserved gene and region
cg21016222	-0.011188328	NA	NA	NA	NA	NA	Thra	Thra_Exon	11	98764351	98764400	98764351	98764352	50	+	CGTCAACCACCGCAAACACAACATTCCGCACTTCTGGCCCAAGCTGCTGA	Exon (Thra-201/Thra, exon 9 of 10)	11	98741811	98769006	27196	1	Thra-201	22540	Nr1d1-201;Nr1d1-202;Thra-201;Thra-202;Thra-203	Nr1d1;Nr1d1;Thra;Thra;Thra	0;6026;0;0;0	TRUE	FALSE	FALSE	FALSE	FALSE	TRUE	FALSE	FALSE	FALSE	Exon	13	18	21833	ENSMUSG00000058756	conserved gene and region	11	98764222	98764378	157	*	157	10
cg21032275	NA	-0.082754236	NA	NA	NA	NA	Sox12	Sox12_threeUTR	2	152394895	152394944	152394943	152394944	50	-	GGCAAGGTCGGGGCAAATACACTTTATTCAGTCCTGGCATCAGACTGGCG	3' UTR	2	152393611	152398063	4453	2	Sox12-202	3119	Sox12-202;Sox12-201	Sox12;Sox12	0;0	TRUE	FALSE	FALSE	FALSE	TRUE	TRUE	FALSE	FALSE	FALSE	threeUTR	7	7	20667	ENSMUSG00000051817	mapped to different genes
cg21066109	-0.095254428	NA	NA	NA	NA	NA	Lmo4	Lmo4_Exon	3	144198443	144198492	144198491	144198492	50	+	ATATAGCAGCTTGCTGTTGATTACCAGGGAAATGAACTCGCTGTCTGGCG	Exon (Gm43445-201/Gm43445-201, exon 1 of 1)	3	144188530	144202396	13867	2	Lmo4-203	3904	Lmo4-203;Lmo4-201;Lmo4-202;Lmo4-207;Lmo4-206;Lmo4-208;Lmo4-205;Lmo4-204	Lmo4;Lmo4;Lmo4;Lmo4;Lmo4;Lmo4;Lmo4;Lmo4	0;0;0;0;0;0;0;0	TRUE	FALSE	FALSE	FALSE	FALSE	TRUE	TRUE	FALSE	FALSE	Exon	18	54	16911	ENSMUSG00000028266	conserved gene but different region	3	144198491	144198963	473	*	473	49
cg21076628	NA	NA	NA	-1.525767033	NA	NA	Samd4b	Samd4b_threeUTR	7	28405959	28406008	28406007	28406008	50	+	GAGTCAGGCACTTTTCGATGAGCTGGAGGTAACTGGTGATGTTCTCCTCG	3' UTR	7	28399522	28436191	36670	2	Samd4b-204	30183	Samd4b-204;Samd4b-201;Samd4b-203;Samd4b-202;Samd4b-205	Samd4b;Samd4b;Samd4b;Samd4b;Samd4b	0;0;0;0;0	TRUE	FALSE	FALSE	FALSE	TRUE	TRUE	FALSE	FALSE	FALSE	threeUTR	9	11	233033	ENSMUSG00000109336	conserved gene but different region
cg21114170	-0.684186502	NA	NA	NA	NA	NA	Hoxc5	Hoxc5_Exon	15	102981693	102981742	102981693	102981694	50	+	CGCTCATCTCTCACGACAATGAAGACCTCCTAGCGTCCAGGTTTCCGGCC	Exon (Hoxc9-201/Hoxc9, exon 2 of 3)	15	102967443	103015676	48234	1	Hoxc5-202	14250	Hoxc5-202;Hoxc9-202;Hoxc9-201	Hoxc5;Hoxc9;Hoxc9	0;0;0	TRUE	FALSE	FALSE	FALSE	FALSE	TRUE	TRUE	FALSE	FALSE	Exon	72	134	15424	ENSMUSG00000022485	conserved gene and region	15	102981651	102982178	528	*	528	70
cg21118011	0.263066683	NA	1.510018477	NA	NA	NA	Phf2	Phf2_threeUTR	13	48802084	48802133	48802084	48802085	50	-	CGTCCCTCCAAACAGGACAAGTGGGAGTGGATAAGGCCTCCACCAAGCTG	3' UTR	13	48801750	48871119	69370	2	Phf2-201	68986	Phf2-201	Phf2	0	TRUE	FALSE	FALSE	FALSE	TRUE	TRUE	FALSE	FALSE	FALSE	threeUTR	1	1	18676	ENSMUSG00000038025	conserved gene and region
cg21126148	0.237214638	NA	NA	NA	NA	NA	Arf6	Arf6_Exon	12	69373105	69373154	69373153	69373154	50	-	CCGCATTATCAATGACCGGGAGATGAGGGACGCCATAATCCTCATCTTCG	Promoter (<=1kb)	12	69372150	69373783	1634	1	Arf6-201	955	Arf6-201;Gm18113-201	Arf6;Gm18113	0;-3082	TRUE	FALSE	TRUE	FALSE	FALSE	TRUE	FALSE	FALSE	FALSE	Exon	8	8	11845	ENSMUSG00000044147	conserved gene and region	12	69371680	69373175	1496	*	1496	186
cg21128693	0.688920995	NA	NA	NA	NA	NA	Ebf3	Ebf3_Exon	7	137199070	137199119	137199070	137199071	50	+	CGTGTGACAAAAACAGACACTTACTGCCGTAGGGAGAGTTAGCGGAGGAG	Exon (Ebf3-204/Ebf3, exon 14 of 16)	7	137193673	137314445	120773	2	Ebf3-204	115326	Ebf3-204;Ebf3-201;Ebf3-202;Ebf3-203;Ebf3-208;Ebf3-205	Ebf3;Ebf3;Ebf3;Ebf3;Ebf3;Ebf3	0;0;0;0;0;0	TRUE	FALSE	FALSE	FALSE	FALSE	TRUE	TRUE	FALSE	FALSE	Exon	12	84	13593	ENSMUSG00000010476	conserved gene but different region
cg21142636	NA	NA	-0.39479967	NA	NA	NA	4931406P16Rik	4931406P16Rik_Exon	7	34285098	34285147	34285098	34285099	50	+	CGGGTATTGCTGGTGCTGCTGCACCTTCTGCTTGGACCCGCCAAGCAGGA	Exon (4931406P16Rik-202/4931406P16Rik, exon 2 of 14)	7	34236707	34313551	76845	2	4931406P16Rik-202	28404	4931406P16Rik-202;4931406P16Rik-201;4931406P16Rik-210;4931406P16Rik-208;4931406P16Rik-203;4931406P16Rik-204	4931406P16Rik;4931406P16Rik;4931406P16Rik;4931406P16Rik;4931406P16Rik;4931406P16Rik	0;0;0;0;28398;20365	TRUE	FALSE	FALSE	FALSE	FALSE	TRUE	TRUE	FALSE	FALSE	Exon	5	8	233103	ENSMUSG00000066571	conserved gene and region	7	34285022	34285154	133	*	133	9
cg21142942	NA	NA	0.435495041	NA	NA	NA	Brpf3	Brpf3_threeUTR	17	28831337	28831386	28831385	28831386	50	-	GAAGACCGCGGAGACCTGGAGCCCTTGGAGCTGGTGTGGGCCAAGTGCCG	3' UTR	17	28801090	28839949	38860	1	Brpf3-201	30247	Brpf3-201;Brpf3-216;Brpf3-217;Brpf3-219;Brpf3-210;Brpf3-218;Brpf3-212;Brpf3-209;Brpf3-207;Brpf3-205;Brpf3-213;Brpf3-214;Brpf3-215;Brpf3-206;Brpf3-203	Brpf3;Brpf3;Brpf3;Brpf3;Brpf3;Brpf3;Brpf3;Brpf3;Brpf3;Brpf3;Brpf3;Brpf3;Brpf3;Brpf3;Brpf3	0;0;0;0;0;0;0;0;0;0;0;0;0;0;0	TRUE	FALSE	FALSE	FALSE	TRUE	TRUE	TRUE	FALSE	FALSE	threeUTR	7	7	268936	ENSMUSG00000063952	conserved gene and region
cg21153937	-0.412695652	NA	NA	NA	NA	NA	Ttbk2	Ttbk2_fiveUTR	2	120850598	120850647	120850598	120850599	50	+	CGCTATCTTCAGGTTTGCCTGAGAGGGCGAGTTACCGGGAAAGGAGCATC	Promoter (<=1kb)	2	120732816	120850604	117789	2	Ttbk2-201	0	Cdan1-207;Ttbk2-202;Ttbk2-203;Ttbk2-201;Ttbk2-206;Ttbk2-204;Ttbk2-205	Cdan1;Ttbk2;Ttbk2;Ttbk2;Ttbk2;Ttbk2;Ttbk2	0;0;0;0;-208;-234;-163	TRUE	FALSE	TRUE	TRUE	FALSE	TRUE	FALSE	FALSE	FALSE	fiveUTR	1	1	140810	ENSMUSG00000090100	conserved gene but different region	2	120849916	120850788	873	*	873	87
cg21154081	NA	NA	NA	NA	-0.243648968	NA	Fgf12	Fgf12_Intron	16	28447224	28447273	28447224	28447225	50	+	CGCAATCCTACGTGATTGAGGTTTGGATGAGAAATTCTCAGAGGCAGAGC	Intron (Fgf12-205/Fgf12, intron 1 of 4)	16	28162354	28753068	590715	2	Fgf12-205	305795	Fgf12-201;Fgf12-205;Fgf12-202;Fgf12-204	Fgf12;Fgf12;Fgf12;Fgf12	0;0;0;0	TRUE	FALSE	FALSE	FALSE	FALSE	FALSE	TRUE	FALSE	FALSE	Intron	1	5	14167	ENSMUSG00000022523	conserved gene and region
cg21246299	-0.261971473	NA	NA	NA	NA	NA	Nfix	Nfix_Intron	8	84712625	84712674	84712673	84712674	50	+	TGGGTGTTACATCATGTCTGGTTGCTCCTGGAAACCAGACGGGTCAGACG	Intron (Nfix-204/Nfix, intron 10 of 10)	8	84704712	84773396	68685	2	Nfix-204	60722	Nfix-207;Nfix-208;Nfix-204;Nfix-201;Nfix-202;Nfix-203;Nfix-206;Nfix-205	Nfix;Nfix;Nfix;Nfix;Nfix;Nfix;Nfix;Nfix	0;0;0;0;0;0;0;0	TRUE	FALSE	FALSE	FALSE	FALSE	FALSE	TRUE	FALSE	FALSE	Intron	23	49	18032	ENSMUSG00000001911	conserved gene and region
cg21249921	-0.166977828	NA	NA	NA	NA	NA	Ssbp2	Ssbp2_Promoter	13	91460796	91460845	91460796	91460797	50	-	CGGCGGAGAGAACAGCCAGTTGTTTAAAATCCTTCTAGAGCAGTTTCTAA	Promoter (<=1kb)	13	91460283	91688866	228584	1	Ssbp2-209	513	Ssbp2-209;Ssbp2-201;Ssbp2-202;Ssbp2-206;Ssbp2-204;Ssbp2-208;Ssbp2-210;Ssbp2-207	Ssbp2;Ssbp2;Ssbp2;Ssbp2;Ssbp2;Ssbp2;Ssbp2;Ssbp2	0;0;0;0;0;0;0;0	TRUE	FALSE	TRUE	FALSE	FALSE	FALSE	TRUE	FALSE	FALSE	Promoter	3	18	66970	ENSMUSG00000003992	conserved gene and region	13	91460385	91460800	416	*	416	49
cg21278764	NA	-0.003415859	-0.222150182	-0.594007546	NA	NA	Utp11	Utp11_Intron	4	124686382	124686431	124686382	124686383	50	+	CGGCACTAAGCAAGCAGTTGCCAGTTGTACTAAAATTACTACCAACTTAA	Intron (Utp11-201/Utp11, intron 1 of 7)	4	124678160	124693600	15441	2	Utp11-201	7169	Utp11-201;Utp11-202	Utp11;Utp11	0;0	TRUE	FALSE	FALSE	FALSE	FALSE	FALSE	TRUE	FALSE	FALSE	Intron	1	1	67205	ENSMUSG00000028907	conserved gene and region
cg21279088	-0.153118482	NA	NA	NA	NA	NA	Hbp1	Hbp1_fiveUTR	12	31950182	31950231	31950230	31950231	50	-	ACTTTCCTACTTACCAAACCCGTCGCCATTACCAAGTCTTTCAAGCTTCG	Promoter (<=1kb)	12	31929383	31950223	20841	2	Hbp1-201	0	Hbp1-202;Hbp1-201;Hbp1-204;Hbp1-208;Hbp1-206;Hbp1-205;Hbp1-203	Hbp1;Hbp1;Hbp1;Hbp1;Hbp1;Hbp1;Hbp1	0;0;0;0;0;0;0	TRUE	FALSE	TRUE	TRUE	FALSE	TRUE	TRUE	FALSE	FALSE	fiveUTR	1	3	73389	ENSMUSG00000002996	conserved gene and region	12	31950045	31950364	320	*	320	31
cg21371906	-0.024381578	NA	-1.291457596	NA	NA	NA	Pknox2	Pknox2_Intron	9	37013735	37013784	37013783	37013784	50	+	ATGCTAATTGTTCTGAATGAACAGCTCCAGCTGGAAAAGCAGGCAGGCCG	Intron (Pknox2-207/Pknox2, intron 1 of 10)	9	36890982	37083309	192328	2	Pknox2-207	69525	Pknox2-207;Pknox2-201;Pknox2-202;Pknox2-206;Pknox2-204;Pknox2-205;Pknox2-208;Pknox2-210;Pknox2-209;Pknox2-212;Pknox2-211	Pknox2;Pknox2;Pknox2;Pknox2;Pknox2;Pknox2;Pknox2;Pknox2;Pknox2;Pknox2;Pknox2	0;0;0;0;0;0;0;0;0;0;0	TRUE	FALSE	FALSE	FALSE	FALSE	FALSE	TRUE	FALSE	FALSE	Intron	31	47	208076	ENSMUSG00000035934	conserved gene and region
cg21376378	NA	NA	NA	NA	0.238597326	NA	Pou3f1	Pou3f1_threeUTR	4	124659645	124659694	124659693	124659694	50	-	TATTTATTCGTGGAGCCTCTCGGCTCCTGGGGTCCTTCTAACTCCGCCCG	3' UTR	4	124656807	124660655	3849	1	Pou3f1-201	2838	Pou3f1-201	Pou3f1	0	TRUE	FALSE	FALSE	FALSE	TRUE	TRUE	FALSE	FALSE	FALSE	threeUTR	6	85	18991	ENSMUSG00000090125	conserved gene and region	4	124659224	124659760	537	*	537	47
cg21390110	-0.199366534	NA	-0.694445557	NA	NA	NA	Ddx3x	Ddx3x_Exon	X	13287316	13287365	13287316	13287317	50	-	CGCTGGTGTGACAAATCAGATGAAGATGATTGGTCAAAACCACTCCCACC	Exon (Ddx3x-201/Ddx3x, exon 5 of 17)	20	13280970	13294052	13083	1	Ddx3x-201	6346	Ddx3x-201;Ddx3x-205;Ddx3x-204;Ddx3x-202;Ddx3x-203	Ddx3x;Ddx3x;Ddx3x;Ddx3x;Ddx3x	0;0;0;0;-420	TRUE	FALSE	FALSE	FALSE	FALSE	TRUE	TRUE	FALSE	FALSE	Exon	2	6	13205	ENSMUSG00000000787	conserved gene but different region
cg21414531	NA	-0.012778978	NA	NA	NA	NA	Nrip1	Nrip1_Intron	16	76320111	76320160	76320111	76320112	50	-	CGGGTGCCAATTACAGCAACCTTTCAACCCTTTAGGTACTGGAAACTACA	Intron (Nrip1-202/Nrip1, intron 3 of 3)	16	76287400	76373827	86428	2	Nrip1-202	53667	Nrip1-202;Nrip1-201;Nrip1-208;Nrip1-204;Nrip1-207	Nrip1;Nrip1;Nrip1;Nrip1;Nrip1	0;0;0;0;0	TRUE	FALSE	FALSE	FALSE	FALSE	FALSE	TRUE	FALSE	FALSE	Intron	5	8	268903	ENSMUSG00000048490	mapped to different genes
cg21419618	0.057960521	NA	0.123800468	NA	NA	NA	Msra	Msra_Intron	14	64233693	64233742	64233693	64233694	50	-	CGTCAATAAATGTCTGCAATCATATTCTTGAGCTCCTGTGTGATTTCAAG	Intron (Msra-201/Msra, intron 9 of 10)	14	64122625	64455903	333279	2	Msra-201	222161	Msra-201;Msra-205;Msra-204	Msra;Msra;Msra	0;0;0	TRUE	FALSE	FALSE	FALSE	FALSE	FALSE	TRUE	FALSE	FALSE	Intron	3	4	110265	ENSMUSG00000054733	conserved gene and region
cg21421053	NA	NA	NA	NA	-0.101415509	0.014173738	Mapkap1	Mapkap1_Intron	2	34556812	34556861	34556812	34556813	50	-	CGGTTCAATTTAGTTACGATTTTTTGCCATTAGGCTGGGGCTGAATGATG	Intron (Mapkap1-204/Mapkap1, intron 6 of 10)	2	34406862	34623475	216614	1	Mapkap1-204	149950	Mapkap1-204;Mapkap1-202;Mapkap1-201;Mapkap1-209;Mapkap1-203	Mapkap1;Mapkap1;Mapkap1;Mapkap1;Mapkap1	0;0;0;0;0	TRUE	FALSE	FALSE	FALSE	FALSE	FALSE	TRUE	FALSE	FALSE	Intron	50	59	227743	ENSMUSG00000038696	conserved gene and region
cg21423577	NA	NA	NA	NA	0.343391464	NA	Uncx	Uncx_Intergenic_downstream	5	139550084	139550133	139550084	139550085	50	-	CGTAAAATGCCGGTTATTTTATCTAAGGTGAACAATTTGTCTGGCAGCGA	Downstream (1-2kb)	5	139543898	139545268	1371	1	Uncx-202	6235	Uncx-201;Uncx-202	Uncx;Uncx	0;0	FALSE	TRUE	FALSE	FALSE	FALSE	FALSE	FALSE	FALSE	FALSE	Intergenic_downstream	59	88	22255	ENSMUSG00000029546	conserved gene and region	5	139550084	139550187	104	*	104	11
cg21473019	0.269348831	NA	NA	NA	NA	NA	Ilf3	Ilf3_Exon	9	21393679	21393728	21393727	21393728	50	-	GTGCCTTGTCTTCTTATTCCATCCATGAATAGAAACGCTATCAGTCAACG	Exon (Ilf3-201/Ilf3, exon 6 of 20)	9	21367871	21405360	37490	1	Ilf3-201	25808	Ilf3-201;Ilf3-203;Ilf3-206;Ilf3-213;Ilf3-210;Ilf3-202;Ilf3-207;Ilf3-204;Ilf3-208;Ilf3-209;Ilf3-216;Ilf3-211	Ilf3;Ilf3;Ilf3;Ilf3;Ilf3;Ilf3;Ilf3;Ilf3;Ilf3;Ilf3;Ilf3;Ilf3	0;0;0;0;25676;0;25147;0;0;0;0;0	TRUE	FALSE	FALSE	FALSE	FALSE	TRUE	TRUE	FALSE	FALSE	Exon	6	11	16201	ENSMUSG00000032178	conserved gene but different region
cg21476366	NA	NA	NA	0.145193464	NA	NA	C1ql3	C1ql3_Exon	2	13010261	13010310	13010309	13010310	50	+	TGGTTGTTTTTGCAGAGATCAGCCCACATGCTGGTGCCGTCCCCTCCGCG	Exon (C1ql3-201/C1ql3, exon 1 of 2)	2	13003457	13011806	8350	2	C1ql3-201	1496	C1ql3-201	C1ql3	0	TRUE	FALSE	FALSE	FALSE	FALSE	TRUE	FALSE	FALSE	FALSE	Exon	5	9	227580	ENSMUSG00000049630	conserved gene and region	2	13010298	13010656	359	*	359	37
[truncated: 227 more rows]
[truncated: 8 more columns]
