# Supplementary material for: Genetic loci and metabolic states associated with murine epigenetic aging
Source: eLife. 2022 Apr 7;11:e75244. doi: 10.7554/eLife.75244 (PMC9049972; doi:10.7554/eLife.75244)
Supplement: Supplementary file 3. [file elife-75244-supp3.xlsx]

## Sheet: Sheet1
Supplementary file 3. Covariates of the DNA methylation based readouts
BW0 is the first body weight measure, taken when mice were ~4 months old. For 48 high fat diet (HFD) cases, BW0 was taken 1 or 2 days after introuction to HFD
BW1 is second measure, taken when mice were ~6 months old
deltaBW = BW1 - BW0
		Correlation with methylome entropy						Correlation with body weight traits										Sex effect
		210 CD mice and 129 HFD mice																n = 40 females; n = 18 males
index	Variable	r (entropy, CD+HFD)	p (entropy, CD+HFD)	r (entropy, CD)	p (entropy, CD)	r (entropy, HFD)	p (entropy, HFD)	r (BW0, 48 cases on HFD 1 or 3 days prior to weighing)	p (BW0, 48 cases on HFD 1 or 3 days prior to weighing)	r (BW1, CD; n=210)	p (BW1, CD; n=210)	r (BW1, HFD; n=128)	p (BW1, HFD; n=128)	r (detlaBW, CD; n=210)	p (deltaBW, CD; n=210)	r (deltaBW, HFD; n=128)	p (deltaBW, HFD; n=128)	FemaleMean	FemaleSD	MaleMean	MaleSD	Sex (p)
1	EAA, pan	0.2768	<.0001	0.1879	0.0063	0.3888	<.0001	0.333	0.0208	0.2581	0.0002	0.272	0.0019	0.1774	0.0117	0.1858	0.0357	-0.035756	0.258998	0.172661	0.215734	0.0043
2	EAA, liver	0.2406	<.0001	0.1939	0.0048	0.3225	0.0002	0.2707	0.0628	0.1268	0.0728	0.3559	<.0001	0.1207	0.0879	0.3073	0.0004	-0.025998	0.217617	0.0847796	0.110732	0.0464
3	dev.EAA, pan	0.1776	0.001	0.0988	0.1538	0.2757	0.0016	0.4404	0.0017	0.1436	0.042	0.4094	<.0001	0.1485	0.0354	0.339	<.0001	-0.00313	0.221831	0.207087	0.211257	0.0013
4	dev.EAA, liver	0.143	0.0084	0.1162	0.0931	0.1907	0.0304	0.3964	0.0053	0.2254	0.0013	0.3728	<.0001	0.085	0.2302	0.255	0.0037	-0.005406	0.229339	0.191801	0.135419	0.0013
5	int.EAA, pan	-0.0083	0.8786	-0.041	0.5544	-0.0026	0.977	0.4469	0.0014	0.1191	0.0922	0.282	0.0013	0.2442	0.0005	0.1923	0.0296	-0.054071	0.305177	0.325358	0.302655	<.0001
6	int.EAA, liver	0.3606	<.0001	0.2532	0.0002	0.4892	<.0001	0.5773	<.0001	0.1139	0.1074	0.4196	<.0001	0.1458	0.039	0.3533	<.0001	0.0237293	0.308578	0.201842	0.253215	0.0365
7	Methylome-wide entropy							0.2924	0.0437	0.0753	0.2882	0.2342	0.0078	-0.0481	0.4982	0.1962	0.0264	2.66896	0.0276558	2.66561	0.0276558	0.6925
