# Supplementary material for: Genetic loci and metabolic states associated with murine epigenetic aging
Source: eLife. 2022 Apr 7;11:e75244. doi: 10.7554/eLife.75244 (PMC9049972; doi:10.7554/eLife.75244)
Supplement: Supplementary file 5. [file elife-75244-supp5.xlsx]

## Sheet: Sheet1
Supplementary file 5. Multivariable regression analysis of epigenetic age acceleration
Regreesion model: lm(outcome ~ glucose + cholesterol + diet + final body weight + age + entropy + batch)
Entropy is entropy computed from the full set of CpGs; batch is the 96-well plates
df = 271 (62 observations deleted due to missingness)
Analysis is R version 4.1.1
	Intercept				Serum glucose as predictor				Serum cholesterol as predictor				Diet as predictor				Final body weight as predictor				Chronological age as predictor				Methylome-wide entropy as predictor				correction for batch (96-well plates)
Outcome	intercept.estimate	intercept.stEr	intercept.tval	intercept.p	gluc.estimate	gluc.stEr	gluc.tval	gluc.p	chol.estimate	chol.stEr	chol.tval	chol.p	dietHFD.estimate	dietHFD.stEr	dietHFD.tval	dietHFD.p	bwf.estimate	bwf.stEr	bwf.tval	bwf.p	age.estimate	age.stEr	age.tval	age.p	entropy.estimate	entropy.stEr	entropy.tval	entropy.p	batch.estimate	batch.stEr	batch.tval	batch.p
EAA, pan	-7.43677	1.25259	-5.93712	8.92302e-09	-0.00616114	0.00367108	-1.67829	0.0944519	0.011279	0.0127031	0.887899	0.375388	0.0324302	0.0304616	1.06463	0.287999	0.00539666	0.00125021	4.3166	2.23e-05	-0.0567424	0.0271558	-2.08951	0.0376011	2.78781	0.470957	5.91946	9.81e-09	-0.0460338	0.00950773	-4.84173	2.17e-06
EAA, liver	-5.21707	1.02109	-5.10932	6.13634e-07	0.000721198	0.00299261	0.240993	0.809744	0.0083937	0.0103553	0.810568	0.41833	-0.0653747	0.0248318	-2.6327	0.00896067	0.00389261	0.00101915	3.81946	0.00016611	-0.0032896	0.022137	-0.148602	0.881979	1.89078	0.383917	4.92498	1.47e-06	0.0169466	0.00775055	2.18651	0.0296403
dev.EAA, pan	-5.5027	1.38799	-3.9645	9.43276e-05	-0.00195716	0.00406793	-0.481119	0.630823	0.0280469	0.0140763	1.9925	0.047327	-0.0650742	0.0337545	-1.92787	0.0549241	0.00588828	0.00138536	4.25036	2.95e-05	-0.0403246	0.0300914	-1.34007	0.181352	1.95486	0.521868	3.74589	0.000219929	0.0342766	0.0105355	3.25344	0.00128588
dev.EAA, liver	-3.15659	1.17611	-2.68392	0.00772772	-0.00301381	0.00344694	-0.874342	0.382712	0.0213571	0.0119274	1.79059	0.0744839	-0.0941908	0.0286017	-3.29319	0.00112326	0.00457797	0.00117388	3.89987	0.00012163	-3.6e-07	0.0254978	-1.41e-05	0.999989	1.11152	0.442202	2.51361	0.012535	0.0183869	0.00892722	2.05965	0.0403947
int.EAA, pan	1.13875	1.81418	0.627691	0.530739	-0.00750904	0.005317	-1.41227	0.159026	0.0452421	0.0183984	2.45902	0.0145616	-0.0602511	0.0441189	-1.36565	0.173189	0.0077254	0.00181074	4.26644	2.75e-05	-0.015036	0.039331	-0.382295	0.702544	-0.547456	0.682109	-0.802593	0.422919	0.0246236	0.0137705	1.78814	0.0748789
int.EAA, liver	-9.9925	1.30872	-7.63532	3.94437e-13	-0.00249483	0.0038356	-0.650441	0.515963	0.0303864	0.0132723	2.28946	0.0228275	-0.0271887	0.0318267	-0.854275	0.393713	0.00594523	0.00130624	4.55142	8.08e-06	-0.0490363	0.0283727	-1.72829	0.0850836	3.64638	0.492062	7.41041	1.63e-12	0.031621	0.0099338	3.18317	0.00162784
