# Supplementary material for: Genetic loci and metabolic states associated with murine epigenetic aging
Source: eLife. 2022 Apr 7;11:e75244. doi: 10.7554/eLife.75244 (PMC9049972; doi:10.7554/eLife.75244)
Supplement: Supplementary file 6. [file elife-75244-supp6.csv]

Supplementary file 6. Epigenome-wide association study results and annotations for 27996 CpG probes
Differentially methylated CpGs (DMCs) selected at Bonferroni p = 0.05 (unadjusted p = 1.8E-0.06)
Regression model: lm(CpG ~ age + diet + strain median lifespan + final body weight + PC1)
		Association with chronological age						Association with strain median lifespan						Association with strain diet						Association with strain final body weight							Probe annotations
Index	CGid	age.estimate	age.stEr	age.tval	unadjusted.age.p	AgeEff	Age-DMC	ls.estimate	ls.stEr	ls.tval	ls.p	lsEff	LS-DMC	diet.estimate	diet.stEr	diet.tval	diet.p	dietEff	diet-DMC	minusLog10diet.p	bwF.estimate	bwF.stEr	bwF.tval	bwF.p	bwFEff	BW-DMC	Mean methylation	SYMBOL	GeneRegionID	seqnames	probeStart	probeEnd	CGstart	CGend	width	strand	seq	annotation	geneChr	geneStart	geneEnd	geneLength	geneStrand	transcriptId	distanceToTSS	flank_txIds	flank_geneIds	flank_gene_distances	genic
26629	cg18711590	0.0000386	0.00000901	4.280476953	0.0000249	gain	ns	-0.000116932	0.0000153	-7.63807722	2.76E-13	neg	yes	0.00726382	0.004485044	1.61956503	0.106342566	pos	ns	0.973292865	-0.001089869	0.00015424	-7.066045082	1.06E-11	neg	yes	0.760627112	Dennd5b	Dennd5b_Exon	6	149044508	149044557	149044508	149044509	50	+	CGGTTGGTCAGCCAGGATTCCATGTCCTGGGCAGTCTGAATGACAAATGC	Exon (Dennd5b-201/Dennd5b, exon 5 of 21)	6	148988071	149101680	113610	2	Dennd5b-201	57123	Dennd5b-201;Dennd5b-205;Dennd5b-207;Gm15781-201	Dennd5b;Dennd5b;Dennd5b;Gm15781	0;0;-1635;3528	TRUE
27070	cg25575366	0.00000784	0.000014	0.559156796	0.576458436	gain	ns	0.000170696	0.0000238	7.165240486	5.70E-12	pos	yes	0.021599854	0.006979263	3.094861718	0.002148641	pos	ns	2.667836191	0.0000581	0.000240016	0.242221479	0.808768718	pos	ns	0.435168755	Ctnnbl1	Ctnnbl1_Intergenic_upstream	2	157664124	157664173	157664172	157664173	50	+	AACACTCATTTTAAACACAGGCAACTGAATTCCTGCAGACAGGCGCCACG	Distal Intergenic	2	157737401	157891614	154214	1	Ctnnbl1-201	-73228	NA	NA	NA	FALSE
16763	cg09498415	0.0000609	0.0000087	6.99517903	1.64E-11	gain	yes	-0.000103779	0.0000148	-7.01757891	1.43E-11	neg	yes	-0.000856762	0.0043325	-0.197752288	0.843368484	neg	ns	0.073982632	-0.000169578	0.000148994	-1.138152219	0.255935768	neg	ns	0.619983198	Syn3	Syn3_Intron	10	86457360	86457409	86457408	86457409	50	-	ACTGTGTGCACATTGTCTCCCTGATAAAAGGGGCCGGGCCTGGGAAAACG	Intron (Syn3-201/Syn3, intron 2 of 13)	10	86055125	86498856	443732	2	Syn3-201	41447	Syn3-201;Syn3-206;Syn3-202;Syn3-203;Syn3-204	Syn3;Syn3;Syn3;Syn3;Syn3	0;0;0;0;0	TRUE
19993	cg18455914	0.00000579	0.0000111	0.521032073	0.602716408	gain	ns	0.000131203	0.0000189	6.945790892	2.22E-11	pos	yes	0.028659231	0.005534009	5.178746789	0.000000403	pos	ns	6.394933051	-0.000560651	0.000190314	-2.945925507	0.003463854	neg	ns	0.218755753	Nhsl2	Nhsl2_fiveUTR	X	102005054	102005103	102005102	102005103	50	-	GGCTGCCAGTCCAGAGCAGAATGATGGGCAACTCTCACCACAAGCAACCG	5' UTR	20	101849385	102076276	226892	1	Nhsl2-202	155669	Nhsl2-202;Nhsl2-201;Nhsl2-207;Nhsl2-206	Nhsl2;Nhsl2;Nhsl2;Nhsl2	0;0;0;0	TRUE
14838	cg19929340	0.0000274	0.000012	2.280405361	0.023262262	gain	ns	0.000140171	0.0000204	6.87870997	3.34E-11	pos	yes	0.007779826	0.00596991	1.303172914	0.193482818	pos	ns	0.713357595	0.000281183	0.000205305	1.369589215	0.171806444	pos	ns	0.491436584	Sez6	Sez6_Promoter	11	77930437	77930486	77930485	77930486	50	-	AGCCCTGGCATTTATTGAGCGCAAAGTAATAATTTATTATCCTTTGTACG	Promoter (<=1kb)	11	77930800	77979048	48249	1	Sez6-202	-363	Sez6-202;Sez6-207;Sez6-205;Sez6-201;Sez6-209	Sez6;Sez6;Sez6;Sez6;Sez6	0;0;0;0;0	FALSE
26920	cg21566778	-0.000015	0.0000925	-0.162391313	0.87110351	loss	ns	0.001078695	0.000157146	6.864287575	3.65E-11	pos	yes	0.16955193	0.046038455	3.682832755	0.000272056	pos	ns	3.565341894	-0.002402388	0.001583259	-1.517369184	0.13019259	neg	ns	0.30862721	Rpl5-ps2	Rpl5-ps2_Intergenic_downstream	2	154708129	154708178	154708129	154708130	50	+	CGGGCCAATTAAGAAGGCAAATGTTTTCAAACAGGAGGATTTATTGGCAT	Distal Intergenic	2	154703809	154704699	891	1	Rpl5-ps2-201	4320	Rpl5-ps2-201	Rpl5-ps2	4320	FALSE
11393	cg13225177	0.0000182	0.0000148	1.230436243	0.219466627	gain	ns	0.000171914	0.0000251	6.837766923	4.29E-11	pos	yes	0.034289644	0.007365714	4.655304741	0.0000048	pos	ns	5.318494381	-0.000621937	0.000253306	-2.455275719	0.014626522	neg	ns	0.319111432	Zic3	Zic3_Intergenic_upstream	X	57918904	57918953	57918904	57918905	50	-	CGAGTAATTGATTTAATGAAGTTCATATGAAACTCCTGAGATTGGCCAAG	Distal Intergenic	20	58022700	58031448	8749	1	Zic3-204	-103796	NA	NA	NA	FALSE
21076	cg14456595	-0.0000155	0.00000495	-3.129889885	0.001915174	loss	ns	0.0000571	0.00000842	6.780071386	6.08E-11	pos	yes	0.001426396	0.0024658	0.57847187	0.563365597	pos	ns	0.249209677	0.000138412	0.0000848	1.632239746	0.103644322	pos	ns	0.906050406	Gm42915	Gm42915_Intergenic_downstream	5	106350215	106350264	106350263	106350264	50	-	TGATGAAACAGACCAGAAATGTATAATGAGGAACATTTAACAAGCTCCCG	Distal Intergenic	5	106355362	106355684	323	2	Gm42915-201	5469	NA	NA	NA	FALSE
22170	cg22237674	0.0000886	0.0000358	2.471294172	0.013999687	gain	ns	-0.000409719	0.0000609	-6.730425757	8.19E-11	neg	yes	-0.007437463	0.017834513	-0.417026433	0.67694771	neg	ns	0.169444877	-0.001268552	0.000613327	-2.068311033	0.039439796	neg	ns	0.789076096	Eif5	Eif5_fiveUTR	12	111539481	111539530	111539481	111539482	50	-	CGAAAATTTTTTCATGTCAGAGACCGAGAACTCTTGCAGTCGTTTATGTC	5' UTR	12	111538016	111546752	8737	1	Eif5-202	1465	Eif5-202;Eif5-214;Eif5-209;Eif5-204;Eif5-212;Eif5-213;Eif5-207;Eif5-210;Eif5-201;Eif5-203;Eif5-208;Eif5-211;Eif5-215;Eif5-217;Eif5-216;Eif5-205;Eif5-206	Eif5;Eif5;Eif5;Eif5;Eif5;Eif5;Eif5;Eif5;Eif5;Eif5;Eif5;Eif5;Eif5;Eif5;Eif5;Eif5;Eif5	0;0;1265;0;0;0;0;0;0;0;0;0;0;0;0;-2695;-3301	TRUE
10793	cg21389633	0.000161577	0.0000115	14.09515403	3.32E-35	gain	yes	-0.000130626	0.0000195	-6.707498448	9.39E-11	neg	yes	-0.007818264	0.005705388	-1.370329933	0.171575439	neg	ns	0.765544881	-0.000764847	0.000196208	-3.898146585	0.000118837	neg	ns	0.731179152	Grk6	Grk6_Exon	13	55451374	55451423	55451374	55451375	50	+	CGACAGCATCTACTTCAACCGTTTCCTGCAGTGGAAGTGGCTGGAAAGGT	Exon (Grk6-205/Grk6, exon 6 of 16)	13	55445072	55460922	15851	1	Grk6-205	6302	Grk6-205;Grk6-201;Grk6-206;Grk6-207;Grk6-202;Grk6-203	Grk6;Grk6;Grk6;Grk6;Grk6;Grk6	0;0;0;0;0;0	TRUE
22817	cg00915901	0.00000901	0.0000219	0.412334112	0.680379546	gain	ns	0.000248425	0.0000371	6.689619634	1.05E-10	pos	yes	0.039296657	0.010879555	3.611972744	0.000354345	pos	ns	3.45057332	-0.00023041	0.000374147	-0.615828369	0.538459683	neg	ns	0.700413372	Faah	Faah_Intron	4	115972817	115972866	115972865	115972866	50	+	ATTGAAAATGATAGAGAGCAGATTGGAAATGGCTTCGCCCGCCCGACCCG	Intron (Faah-202/Faah, intron 13 of 14)	4	115967145	116017675	50531	2	Faah-202	44809	Faah-202	Faah	0	TRUE
276	cg19993195	-0.00000372	0.0000197	-0.188741672	0.850418791	loss	ns	0.00022317	0.0000335	6.668027848	1.19E-10	pos	yes	0.023898785	0.009805191	2.437360405	0.015356926	pos	ns	1.813695713	0.000167786	0.0003372	0.497585447	0.619129022	pos	ns	0.584521719	Npas4	Npas4_threeUTR	19	4985018	4985067	4985018	4985019	50	+	CGTCTTGATGACAATATGCCATACTTGACGACGTTAAGTCACAGACTTAT	3' UTR	19	4984355	4989971	5617	2	Npas4-202	4904	Npas4-202;Npas4-201;Npas4-203	Npas4;Npas4;Npas4	0;0;0	TRUE
21083	cg15868957	0.000004	0.00000829	0.482856096	0.629538725	gain	ns	0.0000933	0.0000141	6.623908567	1.55E-10	pos	yes	0.015398759	0.004125749	3.732354609	0.000225624	pos	ns	3.646614575	-0.0000826	0.000141884	-0.581887622	0.561065287	neg	ns	0.918397905	Gm42915	Gm42915_Intergenic_upstream	5	106386755	106386804	106386755	106386756	50	+	CGGTGATTTTGTGACATGAAACATTGAATGCTCTTTTTTGACACACTATT	Distal Intergenic	5	106355362	106355684	323	2	Gm42915-201	-31071	NA	NA	NA	FALSE
25207	cg15523513	-0.0000183	0.0000127	-1.439563792	0.150999863	loss	ns	0.00014271	0.0000216	6.610443938	1.67E-10	pos	yes	0.025865575	0.006324732	4.08959196	0.0000551	pos	ns	4.258626821	-0.000513309	0.000217507	-2.359965079	0.018896012	neg	ns	0.21329473	Pcdh19	Pcdh19_Promoter	X	133691530	133691579	133691530	133691531	50	+	CGGCCATTAACAATCCCCCAGGTAACGAGAAATGGAAGAATTACTCAGGT	Promoter (2-3kb)	20	133582860	133688987	106128	2	Pcdh19-202	-2543	Pcdh19-202;Pcdh19-203	Pcdh19;Pcdh19	0;0	FALSE
27069	cg23795407	0.0000493	0.000015	3.294848995	0.001098853	gain	ns	0.000163562	0.0000254	6.428137338	4.87E-10	pos	yes	0.030205739	0.00745444	4.052046854	0.0000642	pos	ns	4.192194087	0.00000212	0.000256358	0.008281135	0.993398013	pos	ns	0.297276438	Ctnnbl1	Ctnnbl1_Intergenic_upstream	2	157664119	157664168	157664167	157664168	50	+	ATGTTAACACTCATTTTAAACACAGGCAACTGAATTCCTGCAGACAGGCG	Distal Intergenic	2	157737401	157891614	154214	1	Ctnnbl1-201	-73233	NA	NA	NA	FALSE
24197	cg12232590	0.0000364	0.0000208	1.748442547	0.081377291	gain	ns	-0.000224385	0.0000354	-6.337862709	8.20E-10	neg	yes	0.023104912	0.010372145	2.227592438	0.02662525	pos	ns	1.574706309	-0.001570012	0.000356697	-4.401526933	0.0000148	neg	ns	0.659972778	Pabpc4	Pabpc4_Intron	4	123295693	123295742	123295693	123295694	50	-	CGTGGCCAGTTGGACATCTGCCGCCAACACTGATGTGCATTTGCTGGTCT	Intron (Pabpc4-204/Pabpc4, intron 10 of 13)	4	123282825	123298925	16101	1	Pabpc4-204	12868	Pabpc4-204;Pabpc4-203;Pabpc4-208;Pabpc4-202;Pabpc4-201;Pabpc4-205;Pabpc4-206	Pabpc4;Pabpc4;Pabpc4;Pabpc4;Pabpc4;Pabpc4;Pabpc4	0;0;0;0;0;0;-1438	TRUE
1691	cg03288037	0.0000675	0.0000144	4.687672761	0.00000415	gain	ns	-0.000153908	0.0000244	-6.294968653	1.05E-09	neg	yes	0.036386357	0.007162816	5.079895294	0.000000653	pos	ns	6.184779228	-0.000741768	0.000246329	-3.011295789	0.002815338	neg	ns	0.807313977	Tle4	Tle4_Intron	19	14590347	14590396	14590395	14590396	50	+	GACAGCATTTTCTCCAGCAGATGAAGTAGATGCCGATTGATTTGCTGTCG	Intron (Tle4-201/Tle4, intron 4 of 19)	19	14448150	14598051	149902	2	Tle4-201	7655	Tle4-201;Tle4-202;Tle4-203	Tle4;Tle4;Tle4	0;0;0	TRUE
27054	cg25820606	0.0000135	0.00000699	1.931284025	0.054359382	gain	ns	-0.0000748	0.0000119	-6.294386435	1.05E-09	neg	yes	-0.011184534	0.003479859	-3.214076864	0.001446486	neg	ns	2.839685764	0.000223639	0.000119672	1.868766528	0.062598236	pos	ns	0.935735434	Rpn2	Rpn2_Exon	2	157310243	157310292	157310291	157310292	50	+	GATCTTTCCACCGTGGATAAGGATCAGAGCATTGCACCCAAAACTACCCG	Exon (Rpn2-202/Rpn2, exon 10 of 17)	2	157279059	157326319	47261	1	Rpn2-202	31184	Rpn2-202;Rpn2-201;Rpn2-206;Rpn2-205;Rpn2-203	Rpn2;Rpn2;Rpn2;Rpn2;Rpn2	0;0;0;0;-4259	TRUE
23780	cg12285577	0.000123485	0.0000101	12.26105103	1.91E-28	gain	yes	-0.000107644	0.0000171	-6.291385464	1.07E-09	neg	yes	0.006994482	0.005012595	1.395381337	0.163899633	pos	ns	0.785422019	-0.00072866	0.000172383	-4.226987967	0.0000312	neg	ns	0.790175257	Vps39	Vps39_Exon	2	120338468	120338517	120338468	120338469	50	+	CGAGCTGCAGAGCCAATTCAAACTGCTTGTCCTGGAGAAGTTGTTGGATT	Exon (Vps39-201/Vps39, exon 10 of 25)	2	120316461	120353125	36665	2	Vps39-201	14608	Vps39-201;Vps39-202;Vps39-204;Vps39-209;Vps39-207;Vps39-210	Vps39;Vps39;Vps39;Vps39;Vps39;Vps39	0;0;0;0;0;14604	TRUE
11328	cg20552236	0.0000189	0.00000685	2.756156185	0.0061948	gain	ns	-0.0000731	0.0000116	-6.279366555	1.15E-09	neg	yes	0.011705747	0.003409228	3.433547227	0.00067676	pos	ns	3.169565451	-0.001083425	0.000117243	-9.240846473	4.03E-18	neg	yes	0.803740065	Csk	Csk_Exon	9	57630957	57631006	57631005	57631006	50	-	TGCCGTGGAAGTTGTACTTGGCAATACATTCTGTACCGGATGGCCAGGCG	Promoter (<=1kb)	9	57630477	57630970	494	2	Csk-205	0	Csk-201;Csk-209;Csk-204;Csk-202;Csk-208;Csk-206;Csk-207;Csk-205	Csk;Csk;Csk;Csk;Csk;Csk;Csk;Csk	0;0;0;-2196;0;0;0;0	TRUE
278	cg08221382	0.0000034	0.0000176	0.193501294	0.846693116	gain	ns	0.000187225	0.0000299	6.263463834	1.26E-09	pos	yes	0.033334774	0.008757221	3.806547113	0.000169821	pos	ns	3.770009102	-0.000439793	0.00030116	-1.460329792	0.145212162	neg	ns	0.159592564	Npas4	Npas4_threeUTR	19	4985026	4985075	4985074	4985075	50	+	TGACAATATGCCATACTTGACGACGTTAAGTCACAGACTTATTCAAAACG	3' UTR	19	4984355	4989971	5617	2	Npas4-202	4896	Npas4-202;Npas4-201;Npas4-203	Npas4;Npas4;Npas4	0;0;0	TRUE
13784	cg26303013	0.0000128	0.00000416	3.073023731	0.002307179	gain	ns	-0.000044	0.00000707	-6.226987743	1.54E-09	neg	yes	0.002441986	0.002071157	1.179044331	0.239284652	pos	ns	0.621085157	-0.0000356	0.0000712	-0.500060833	0.617387021	neg	ns	0.83291207	Rfx7	Rfx7_Exon	9	72616723	72616772	72616771	72616772	50	+	CACTCAGCACATGCAGTCTGTGAAACAGGCACCAAAGACTCCCCAGAACG	Exon (Rfx7-202/Rfx7, exon 9 of 9)	9	72532240	72622829	90590	1	Rfx7-202	84483	Rfx7-202;Rfx7-201;Rfx7-203;Rfx7-205;Rfx7-204	Rfx7;Rfx7;Rfx7;Rfx7;Rfx7	0;0;0;0;0	TRUE
24626	cg12713245	-0.00000632	0.0000115	-0.550002465	0.582713729	loss	ns	-0.000120959	0.0000195	-6.193108146	1.87E-09	neg	yes	-0.000444035	0.005721995	-0.077601515	0.938195099	neg	ns	0.02770684	-0.001562248	0.000196779	-7.939102741	3.77E-14	neg	yes	0.757382862	Mbd6	Mbd6_threeUTR	10	127282831	127282880	127282879	127282880	50	-	TGCTATGGGGCCAGTTTCCTCCTCTTGTTTTTGGCAGGACGGCCAGGGCG	Promoter (<=1kb)	10	127281956	127283668	1713	2	Mbd6-204	788	Dctn2-201;Dctn2-205;Dctn2-203;Dctn2-204;Mbd6-204;Mbd6-203;Mbd6-201;Mbd6-202;Mbd6-205;Mbd6-207;Mbd6-206	Dctn2;Dctn2;Dctn2;Dctn2;Mbd6;Mbd6;Mbd6;Mbd6;Mbd6;Mbd6;Mbd6	0;5891;5550;5425;0;0;0;0;0;1491;0	TRUE
26863	cg18463965	-0.000144759	0.000033	-4.381566199	0.0000162	loss	ns	0.000347233	0.0000561	6.186507494	1.94E-09	pos	yes	0.116543776	0.01644345	7.087549969	9.25E-12	pos	yes	11.03394683	-0.002517044	0.000565489	-4.45109294	0.0000119	neg	ns	0.488015044	Nol4l	Nol4l_Intron	2	153494573	153494622	153494573	153494574	50	+	CGGAAAGGGAGATGTTCGTACCTTCTGACATACACTGAGTAATGTGCAAA	Intron (Nol4l-201/Nol4l, intron 1 of 10)	2	153407462	153529971	122510	2	Nol4l-201	35349	4930404H24Rik-201;Nol4l-201;Nol4l-203	4930404H24Rik;Nol4l;Nol4l	0;0;0	TRUE
485	cg22868841	-0.0000231	0.0000134	-1.715849967	0.087188604	loss	ns	0.000140737	0.0000228	6.162706244	2.22E-09	pos	yes	0.006847688	0.006690441	1.023503228	0.306867994	pos	ns	0.513048405	0.000382065	0.000230084	1.660549146	0.097815099	pos	ns	0.794643691	Gm8652	Gm8652_Intron	6	6459559	6459608	6459559	6459560	50	+	CGCTCACTTTAAGCACAGGCAGCTGGAGATTGTCATATTCTGAAAATGAC	Intron (Gm20617-202/Gm20617-202, intron 1 of 1)	6	6351304	6352267	964	2	Gm8652-201	-107292	NA	NA	NA	TRUE
841	cg16754150	-0.00000736	0.000011	-0.670059235	0.503318848	loss	ns	0.000114285	0.0000187	6.121871624	2.79E-09	pos	yes	0.022351409	0.005469191	4.086784903	0.0000558	pos	ns	4.25364295	-0.0000947	0.000188085	-0.503373929	0.61505888	neg	ns	0.795917953	Nxph1	Nxph1_Intron	6	8955146	8955195	8955194	8955195	50	-	AGATTTTCTGCAGACTACAGAAATTGACAGCATTGTCCGGGTAATAACCG	Intron (Nxph1-202/Nxph1, intron 2 of 2)	6	8948614	9249032	300419	1	Nxph1-202	6532	Nxph1-203;Nxph1-202;Nxph1-201	Nxph1;Nxph1;Nxph1	0;0;0	TRUE
10770	cg22979709	-0.0000473	0.0000061	-7.766129979	1.19E-13	loss	yes	-0.0000634	0.0000104	-6.116321903	2.88E-09	neg	yes	0.008569616	0.003034451	2.824107585	0.005048314	pos	ns	2.296853649	-0.000352725	0.000104355	-3.380067854	0.000817384	neg	ns	0.790379541	Nsd1	Nsd1_Exon	13	55312262	55312311	55312310	55312311	50	+	ACTGAGCATGACCCCTGTGGGCCCAATCCTCTGGAACCTGGGGAGATCCG	Exon (Nsd1-207/Nsd1, exon 21 of 21)	13	55209782	55315755	105974	1	Nsd1-207	102480	Nsd1-207;Nsd1-201	Nsd1;Nsd1	0;0	TRUE
27037	cg03584734	-4.88E-09	0.0000109	-0.000446378	0.999644129	loss	ns	-0.000113228	0.0000186	-6.100937805	3.14E-09	neg	yes	-0.027415779	0.005437178	-5.042280549	0.000000784	neg	ns	6.105643008	0.000626649	0.000186984	3.3513495	0.000903709	pos	ns	0.749250218	Dlgap4	Dlgap4_fiveUTR	2	156748373	156748422	156748373	156748374	50	-	CGCTACCAAATTCCAGTCCATCGGGGTTCAGGTAGAGGACGACTGGCGGT	5' UTR	2	156613705	156764361	150657	1	Dlgap4-205	134668	Dlgap4-205;Dlgap4-212;Dlgap4-206;Dlgap4-202;Dlgap4-210;Dlgap4-209;Dlgap4-204;Dlgap4-208;Dlgap4-211;Dlgap4-214;Dlgap4-213;Dlgap4-201;Dlgap4-203	Dlgap4;Dlgap4;Dlgap4;Dlgap4;Dlgap4;Dlgap4;Dlgap4;Dlgap4;Dlgap4;Dlgap4;Dlgap4;Dlgap4;Dlgap4	0;0;0;0;0;0;0;0;0;0;0;0;0	TRUE
14837	cg17977273	0.00000868	0.00000825	1.051864316	0.293681035	gain	ns	0.0000852	0.000014	6.078524015	3.56E-09	pos	yes	0.003591949	0.004105998	0.874805237	0.382357135	pos	ns	0.417530801	0.000183938	0.000141205	1.30262958	0.193668111	pos	ns	0.901692167	Sez6	Sez6_Promoter	11	77930408	77930457	77930456	77930457	50	+	CACAGTTTGCTGCTGATGCAGCTGCCTGGAGCCCTGGCATTTATTGAGCG	Promoter (<=1kb)	11	77930800	77979048	48249	1	Sez6-202	-343	Sez6-202;Sez6-207;Sez6-205;Sez6-201;Sez6-209	Sez6;Sez6;Sez6;Sez6;Sez6	0;0;0;0;0	FALSE
22189	cg04412186	0.0000416	0.0000172	2.418469029	0.016161894	gain	ns	0.000177484	0.0000293	6.067167716	3.79E-09	pos	yes	0.032908425	0.008570207	3.839863362	0.00014926	pos	ns	3.826055372	-0.000145752	0.000294729	-0.494530868	0.621281585	neg	ns	0.242579912	Hdx	Hdx_Promoter	X	111697088	111697137	111697088	111697089	50	+	CGTGTCCGATCATCAATTCTCATCATGATCGTGACGTCACAAAAGACAGC	Promoter (<=1kb)	20	111569933	111697079	127147	2	Hdx-201	-9	Hdx-202;Hdx-201	Hdx;Hdx	0;0	FALSE
9372	cg14084430	-0.00000678	0.00000859	-0.789473829	0.430438531	loss	ns	0.000088	0.0000146	6.030782454	4.64E-09	pos	yes	0.013832081	0.004277326	3.233814915	0.0013532	pos	ns	2.868638	-0.000119439	0.000147097	-0.811977734	0.417427459	neg	ns	0.532109001	Elf4	Elf4_Intron	X	48450036	48450085	48450084	48450085	50	+	AATTGAAACTCAGCAGCCCCTATGAGGTCAGAACCCTCATAAGCACCCCG	Intron (Elf4-202/Elf4, intron 1 of 8)	20	48411046	48454169	43124	2	Elf4-202	4084	Elf4-202;Elf4-201;Elf4-203	Elf4;Elf4;Elf4	0;0;0	TRUE
19682	cg08799387	-0.0000152	0.0000153	-0.994391437	0.320807872	loss	ns	-0.00015576	0.0000259	-6.003034928	5.41E-09	neg	yes	0.042281985	0.007601539	5.562292707	5.76E-08	pos	ns	7.239828412	-0.002174861	0.000261416	-8.319530697	2.84E-15	neg	yes	0.821352267	Dazap2	Dazap2_Exon	15	100619443	100619492	100619443	100619444	50	+	CGGAAGGGGAACTTCTTCATGGGTGGTTCAGATGGTGGCTACACCATCTG	Exon (Dazap2-201/Dazap2, exon 4 of 4)	15	100615349	100620761	5413	1	Dazap2-201	4094	Dazap2-201;Dazap2-204;Dazap2-202;Dazap2-203;Smagp-201;Smagp-205;Smagp-202;Smagp-204;Smagp-203;Smagp-206	Dazap2;Dazap2;Dazap2;Dazap2;Smagp;Smagp;Smagp;Smagp;Smagp;Smagp	0;3509;0;3111;17363;17199;17448;17372;16008;16067	TRUE
3260	cg13721678	0.000505472	0.0000198	25.54895787	2.86E-78	gain	yes	-0.000201265	0.0000336	-5.988034636	5.87E-09	neg	yes	0.013120208	0.009846919	1.332417599	0.183701599	pos	ns	0.735887063	0.000510987	0.000338635	1.508960768	0.132327304	pos	ns	0.507528365	Cadps2	Cadps2_Exon	6	23410880	23410929	23410880	23410881	50	+	CGGGCACAGTACTCATCTAACACAAAGACTTGGCCAGGGCTAAACCATCC	Exon (Cadps2-213/Cadps2, exon 14 of 30)	6	23262773	23839137	576365	2	Cadps2-213	428208	Cadps2-213;Cadps2-205;Cadps2-212;Cadps2-201;Cadps2-209;Cadps2-206;Cadps2-207;Cadps2-202;Cadps2-204	Cadps2;Cadps2;Cadps2;Cadps2;Cadps2;Cadps2;Cadps2;Cadps2;Cadps2	0;0;0;0;0;0;0;0;0	TRUE
22818	cg05950850	0.0000246	0.0000294	0.836967145	0.403255779	gain	ns	0.000297481	0.0000499	5.963056533	6.74E-09	pos	yes	0.039441674	0.01461529	2.698658226	0.007343578	pos	ns	2.134092311	0.0000428	0.000502619	0.085215393	0.932145161	pos	ns	0.489469205	Faah	Faah_Intron	4	115972831	115972880	115972879	115972880	50	+	AGAGCAGATTGGAAATGGCTTCGCCCGCCCGACCCGCAGAGATGGAAACG	Intron (Faah-202/Faah, intron 13 of 14)	4	115967145	116017675	50531	2	Faah-202	44795	Faah-202	Faah	0	TRUE
14429	cg18230281	0.000055	0.0000112	4.917674308	0.00000142	gain	yes	0.000113199	0.000019	5.952549863	7.14E-09	pos	yes	0.033171309	0.005571327	5.953933052	7.09E-09	pos	ns	8.149636371	-0.00045043	0.000191597	-2.35091707	0.019353307	neg	ns	0.188897543	Rab39b	Rab39b_fiveUTR	X	75578173	75578222	75578221	75578222	50	-	GGATGCTGCGCTCGCAAAGGTGATGAAATGGCAGCAGCATCAGCACCACG	Promoter (<=1kb)	20	75572046	75578231	6186	2	Rab39b-201	9	Rab39b-201	Rab39b	0	TRUE
15679	cg06434807	0.00000583	0.0000123	0.472007819	0.637253278	gain	ns	0.000124794	0.000021	5.947932876	7.32E-09	pos	yes	0.011919981	0.006146719	1.939243023	0.053378882	pos	ns	1.272630526	0.000117376	0.000211385	0.555271568	0.579109383	pos	ns	0.508879282	Gm14741	Gm14741_Intergenic_upstream	X	82814731	82814780	82814731	82814732	50	-	CGACTGACGTATCAGATAGTCAGAGTGGTTACCACACCGACGTTGTAGCA	Distal Intergenic	20	82757430	82758438	1009	2	Gm14741-201	-56342	NA	NA	NA	FALSE
21469	cg12652554	0.00000804	0.00000812	0.99029661	0.322801484	gain	ns	0.000082	0.0000138	5.943697972	7.49E-09	pos	yes	0.010184481	0.004039835	2.521014357	0.0122031	pos	ns	1.913529822	-0.0000999	0.00013893	-0.719355538	0.472463815	neg	ns	0.800235369	Bcl11b	Bcl11b_Exon	12	107915498	107915547	107915546	107915547	50	-	AGGGCATCTGGCAGATGTCGCAGCGGTACACCTCCTTGCCGATCTGCCCG	Exon (Bcl11b-201/Bcl11b, exon 4 of 4)	12	107910403	108003602	93200	2	Bcl11b-201	88055	Bcl11b-201;Bcl11b-202;Bcl11b-203	Bcl11b;Bcl11b;Bcl11b	0;0;0	TRUE
14283	cg03724931	0.0000298	0.0000128	2.320293843	0.020973917	gain	ns	-0.000129603	0.0000218	-5.943337869	7.51E-09	neg	yes	0.004179577	0.00638853	0.654231379	0.513447799	pos	ns	0.289503704	-0.000323909	0.000219701	-1.474319283	0.141410426	neg	ns	0.570983868	Smg6	Smg6_Intron	11	75054288	75054337	75054288	75054289	50	+	CGATCATTTCCTCACTTGTTTAAATAGTGCAGCTTGTGTTGGCAGTGCTC	Intron (Smg6-201/Smg6, intron 13 of 18)	11	74925823	75164448	238626	1	Smg6-201	128465	Smg6-201;Smg6-202;Smg6-204	Smg6;Smg6;Smg6	0;0;0	TRUE
16475	cg25117614	0.0000361	0.00000982	3.678255343	0.000276775	gain	ns	-0.0000988	0.0000167	-5.921797315	8.45E-09	neg	yes	-0.007633275	0.004889331	-1.561210521	0.119494344	neg	ns	0.922652649	-0.0000244	0.000168144	-0.144868663	0.884908709	neg	ns	0.638908369	Cntln	Cntln_Intron	4	85118927	85118976	85118975	85118976	50	+	TATTACTGTGTCTTCCCGCATTCTCTACAATATTTTCTACTGAGACCTCG	Intron (Cntln-201/Cntln, intron 25 of 25)	4	84884309	85131921	247613	1	Cntln-201	234618	Cntln-201;Cntln-204;Cntln-203	Cntln;Cntln;Cntln	0;0;0	TRUE
21466	cg13795805	0.00000151	0.00000404	0.374407769	0.70835694	gain	ns	0.0000405	0.00000687	5.895278971	9.76E-09	pos	yes	0.005112631	0.002012024	2.541038254	0.01153959	pos	ns	1.937809603	-0.00000985	0.0000692	-0.142407709	0.886850483	neg	ns	0.960772379	Bcl11b	Bcl11b_Exon	12	107915468	107915517	107915516	107915517	50	+	TGTGTTTCTCCAGGGTGCTGTAGACGCTGAAGGGCATCTGGCAGATGTCG	Exon (Bcl11b-201/Bcl11b, exon 4 of 4)	12	107910403	108003602	93200	2	Bcl11b-201	88085	Bcl11b-201;Bcl11b-202;Bcl11b-203	Bcl11b;Bcl11b;Bcl11b	0;0;0	TRUE
26751	cg07143052	0.0000324	0.0000162	1.998635822	0.046520735	gain	ns	0.000162531	0.0000276	5.894706662	9.79E-09	pos	yes	0.047823866	0.008077746	5.920446919	8.51E-09	pos	ns	8.070031111	-0.001174495	0.000277793	-4.227949068	0.0000311	neg	ns	0.356226296	Smc1a	Smc1a_Exon	X	152016594	152016643	152016594	152016595	50	+	CGGACCATTTCAGAGGTTCACCGCCATCATTGGACCCAATGGCTCTGGTG	Promoter (<=1kb)	20	152016428	152036212	19785	1	Smc1a-206	166	Ribc1-201;Ribc1-202;Smc1a-206;Smc1a-201	Ribc1;Ribc1;Smc1a;Smc1a	-299;-324;0;0	TRUE
5678	cg17453502	-0.00000573	0.0000138	-0.414659125	0.678678257	loss	ns	-0.00013809	0.0000235	-5.87711897	1.08E-08	neg	yes	0.049067902	0.006883611	7.128221422	7.18E-12	pos	yes	11.14394955	-0.001069446	0.000236727	-4.517636248	0.0000089	neg	ns	0.802520691	Mapkap1	Mapkap1_Intron	2	34535261	34535310	34535261	34535262	50	+	CGGCTTTTGCCAGCTGACTGCGCCGTTTGATAACCAGCTCTCTGGATGCC	Intron (Mapkap1-204/Mapkap1, intron 6 of 10)	2	34406862	34623475	216614	1	Mapkap1-204	128399	Mapkap1-204;Mapkap1-202;Mapkap1-201;Mapkap1-209;Mapkap1-203;Mapkap1-207	Mapkap1;Mapkap1;Mapkap1;Mapkap1;Mapkap1;Mapkap1	0;0;0;0;0;0	TRUE
4201	cg23479761	0.0000159	0.0000173	0.9219477	0.357272809	gain	ns	-0.000171936	0.0000293	-5.865750768	1.15E-08	neg	yes	0.027057558	0.008587378	3.150852247	0.001786893	pos	ns	2.747901473	-0.001668519	0.000295319	-5.649884523	3.64E-08	neg	yes	0.703034018	Tasor	Tasor_threeUTR	14	27480682	27480731	27480730	27480731	50	-	GATTTCCCAACATTAAACGTGAACACATTTCGCAGAAGCTTTTAGCATCG	3' UTR	14	27428834	27483555	54722	1	Tasor-201	51848	Ccdc66-202;Ccdc66-203;Ccdc66-201;Tasor-201;Tasor-204	Ccdc66;Ccdc66;Ccdc66;Tasor;Tasor	27729;3144;27714;0;0	TRUE
22815	cg02266179	0.000014	0.0000174	0.802974598	0.422604621	gain	ns	0.00017289	0.0000296	5.837261389	1.34E-08	pos	yes	0.014425909	0.008677164	1.662514127	0.097420459	pos	ns	1.011349829	0.00035206	0.000298407	1.179799122	0.238984693	pos	ns	0.693478573	Faah	Faah_Intron	4	115972724	115972773	115972724	115972725	50	+	CGAGCTGGTGATGAATATGTGTCACTTTACACGGCGCACACTCGGGGGCC	Intron (Faah-202/Faah, intron 13 of 14)	4	115967145	116017675	50531	2	Faah-202	44902	Faah-202	Faah	0	TRUE
6094	cg03225697	0.0000335	0.000014	2.388649196	0.017508455	gain	ns	0.000138839	0.0000238	5.83499526	1.35E-08	pos	yes	0.012239247	0.00697088	1.755767841	0.080115632	pos	ns	1.096282736	-0.000332633	0.000239728	-1.387541943	0.166273169	neg	ns	0.187433763	Nrg2	Nrg2_threeUTR	18	36017680	36017729	36017728	36017729	50	-	CGAAGCTGTAAATCAGGATGTTACATATAAATAGTTTCCCTATAAAAACG	3' UTR	18	36017652	36197380	179729	2	Nrg2-203	179651	Nrg2-203;Nrg2-206;Nrg2-202;Nrg2-205;Psd2-201;Psd2-205;Psd2-206;Psd2-204;Psd2-203	Nrg2;Nrg2;Nrg2;Nrg2;Psd2;Psd2;Psd2;Psd2;Psd2	0;0;0;0;0;0;0;0;0	TRUE
26440	cg04585931	0.000079	0.0000568	1.391808455	0.164978194	gain	ns	-0.000562397	0.0000964	-5.831770522	1.38E-08	neg	yes	-0.065198525	0.028252716	-2.307690566	0.021674672	neg	ns	1.664047456	0.001988808	0.000971609	2.046922657	0.041508578	pos	ns	0.831140327	Foxa2	Foxa2_Intron	2	148036970	148037019	148037018	148037019	50	-	CCTCCCATCCCACGTTGTTGGTTTTCTGTGTGTGGCTTTTGGTGTGAGCG	Intron (9030622O22Rik-203/9030622O22Rik-203, intron 1 of 2)	2	148044240	148045464	1225	2	Foxa2-203	8494	NA	NA	NA	TRUE
13153	cg11493626	0.0000224	0.00000503	4.445610652	0.0000122	gain	ns	-0.0000498	0.00000855	-5.826565164	1.42E-08	neg	yes	-0.00595343	0.002504192	-2.377385408	0.018042246	neg	ns	1.743709389	-0.000110835	0.0000861	-1.286997082	0.199055453	neg	ns	0.811013603	Ikzf2	Ikzf2_Exon	1	69577835	69577884	69577883	69577884	50	+	CACAGACGTCACATTTCAGTTTACCATTCGGAAGCCGGATTCCTCCCTCG	Exon (Ikzf2-201/Ikzf2, exon 4 of 8)	1	69531214	69685821	154608	2	Ikzf2-201	107937	Ikzf2-201;Ikzf2-207;Ikzf2-202;Ikzf2-204;Ikzf2-208;Ikzf2-209;Ikzf2-206	Ikzf2;Ikzf2;Ikzf2;Ikzf2;Ikzf2;Ikzf2;Ikzf2	0;0;0;0;0;0;107416	TRUE
18080	cg06080904	0.0000108	0.00000765	1.416020218	0.157773538	gain	ns	0.0000756	0.000013	5.822972183	1.44E-08	pos	yes	0.013193975	0.003805596	3.466993365	0.000600664	pos	ns	3.221368103	-0.000236631	0.000130874	-1.808077499	0.071563459	neg	ns	0.180280484	Pcyt1b	Pcyt1b_Exon	X	93675471	93675520	93675471	93675472	50	+	CGACTGGTAAGTAAAGACAAAGGATGGAAATGTATGCGTGGCTATGGCAT	Exon (Pcyt1b-201/Pcyt1b, exon 1 of 8)	20	93654863	93749951	95089	1	Pcyt1b-202	20608	Pcyt1b-202;Pcyt1b-201	Pcyt1b;Pcyt1b	0;0	TRUE
26814	cg23754359	-0.0000105	0.00000831	-1.263650302	0.207305013	loss	ns	0.0000819	0.0000141	5.797867704	1.65E-08	pos	yes	0.008638987	0.004136059	2.088700283	0.037550193	pos	ns	1.425387832	-0.00022191	0.000142239	-1.56012222	0.119751269	neg	ns	0.619038064	Rem1	Rem1_Intergenic_downstream	2	152636851	152636900	152636851	152636852	50	-	CGGCAGCAGCCGGGAGAGTGGAAAAAATGATATCAAACCCGGAAAAATGC	Downstream (1-2kb)	2	152632967	152635198	2232	1	Rem1-202	3933	Rem1-201;Rem1-202	Rem1;Rem1	9900;3884	FALSE
25724	cg02730271	-0.000014	0.00000741	-1.892835622	0.059311065	loss	ns	0.0000729	0.0000126	5.792447802	0.000000017	pos	yes	0.009400708	0.00368804	2.548971012	0.011285757	pos	ns	1.947469292	-0.0000827	0.000126831	-0.652199377	0.514755849	neg	ns	0.856587204	Lhx9	Lhx9_Exon	1	138828673	138828722	138828673	138828674	50	+	CGGGATGTTTGGCTGTAATGCCCCAAGATTTGTTCTCCCTGAAAAAAATC	Exon (Lhx9-201/Lhx9, exon 5 of 5)	1	138825186	138842457	17272	2	Lhx9-201	13735	Lhx9-201;Lhx9-203;Lhx9-205;Lhx9-202;Lhx9-204;Lhx9-206;Lhx9-207	Lhx9;Lhx9;Lhx9;Lhx9;Lhx9;Lhx9;Lhx9	0;0;0;0;0;4937;0	TRUE
11402	cg03789534	0.000130059	0.0000312	4.163315922	0.0000407	gain	ns	0.000306704	0.0000531	5.779082096	1.83E-08	pos	yes	0.064923893	0.015548114	4.175676556	0.0000387	pos	ns	4.412801549	-0.000677184	0.000534698	-1.266479222	0.206292346	neg	ns	0.406543033	Zic3	Zic3_Promoter	X	58019044	58019093	58019092	58019093	50	+	GCGCCGCACACTATAAGGAAATAGCGTTTCACGGCTTGCTTTATGGTGCG	Promoter (3-4kb)	20	58022700	58031448	8749	1	Zic3-204	-3607	Zic3-204	Zic3	0	FALSE
15269	cg18536396	-0.00000121	0.0000112	-0.107309848	0.914612587	loss	ns	0.000110255	0.0000191	5.776875494	1.85E-08	pos	yes	0.015273523	0.005591446	2.731587281	0.006664159	pos	ns	2.176254651	-0.000462972	0.000192289	-2.407685313	0.016637909	neg	ns	0.1961653	Zfp36l1	Zfp36l1_threeUTR	12	80109166	80109215	80109166	80109167	50	+	CGGGTGCCCTCTGGCGCTGAAGAGGTAATGTAGTCACAGTGACAAAGTTA	3' UTR	12	80107754	80113013	5260	2	Zfp36l1-201	3798	Zfp36l1-201;Zfp36l1-202;Zfp36l1-204;Zfp36l1-203	Zfp36l1;Zfp36l1;Zfp36l1;Zfp36l1	0;0;0;0	TRUE
1690	cg27370397	0.000110952	0.00000919	12.07754351	8.74E-28	gain	yes	-0.0000901	0.0000156	-5.772910914	1.89E-08	neg	yes	0.00643007	0.00457229	1.406312892	0.160632831	pos	ns	0.794165688	0.0000129	0.000157241	0.081971373	0.934722378	pos	ns	0.818602008	Tle4	Tle4_Intron	19	14590380	14590429	14590380	14590381	50	+	CGATTGATTTGCTGTCGAGCATGGTAAATTAATAGCAACAAATTGCTGAG	Intron (Tle4-201/Tle4, intron 4 of 19)	19	14448150	14598051	149902	2	Tle4-201	7622	Tle4-201;Tle4-202;Tle4-203	Tle4;Tle4;Tle4	0;0;0	TRUE
25206	cg11012613	0.0000065	0.0000109	0.59832792	0.550058048	gain	ns	0.000106064	0.0000184	5.749377666	2.14E-08	pos	yes	0.026953875	0.0054046	4.98720954	0.00000102	pos	ns	5.99061214	-0.000567398	0.000185864	-3.052760596	0.002463844	neg	ns	0.177122442	Pcdh19	Pcdh19_Promoter	X	133691502	133691551	133691502	133691503	50	-	CGGGAGCAAAGAGTCTGAGAAGTAGTCTCGGCCATTAACAATCCCCCAGG	Promoter (2-3kb)	20	133582860	133688987	106128	2	Pcdh19-202	-2564	Pcdh19-202;Pcdh19-203	Pcdh19;Pcdh19	0;0	FALSE
15008	cg12456170	-0.0000298	0.0000166	-1.792192794	0.074077143	loss	ns	0.000162293	0.0000282	5.745687898	2.19E-08	pos	yes	0.011400484	0.008275162	1.377675132	0.169297351	pos	ns	0.771349837	-0.0000664	0.000284582	-0.233432685	0.815579502	neg	ns	0.240314987	Pou4f2	Pou4f2_Promoter	8	78438858	78438907	78438906	78438907	50	-	GTGTAATCTGCTATGCCTCATCTGATTTGTATGCTTAATTCAGCTTGACG	Promoter (2-3kb)	8	78433010	78436645	3636	2	Pou4f2-201	-2262	Pou4f2-201	Pou4f2	0	FALSE
14481	cg15628967	-0.00000675	0.0000033	-2.047785053	0.04142341	loss	ns	-0.0000321	0.0000056	-5.726645812	2.42E-08	neg	yes	0.004655706	0.001640294	2.838336265	0.00483415	pos	ns	2.31567988	-0.000219552	0.0000564	-3.892109683	0.000121692	neg	ns	0.945994909	Smarcb1	Smarcb1_Exon	10	75916768	75916817	75916768	75916769	50	+	CGCACCCTTAGTGTTAGGTTTTGTTTTTTTACCATGTGACGATGCAACTA	Exon (Smarcb1-201/Smarcb1, exon 2 of 9)	10	75896769	75921617	24849	2	Smarcb1-201	4800	Smarcb1-201;Smarcb1-203;Smarcb1-205;Smarcb1-202;Smarcb1-204;Smarcb1-206	Smarcb1;Smarcb1;Smarcb1;Smarcb1;Smarcb1;Smarcb1	0;-2606;-196;0;0;-1604	TRUE
17975	cg04527423	-0.00000767	0.00000752	-1.019701287	0.308665274	loss	ns	0.0000729	0.0000128	5.707523124	2.68E-08	pos	yes	0.009956706	0.003741836	2.660914764	0.008198665	pos	ns	2.086256877	-0.000285518	0.000128681	-2.218793793	0.027224728	neg	ns	0.124363144	Arx	Arx_Intergenic_upstream	X	93069784	93069833	93069784	93069785	50	+	CGATTTAAATTCTGCTTGCCTCATTCTTTGCATAGACAGCAACGGGCTGA	Distal Intergenic	20	93286445	93288382	1938	1	Arx-203	-216612	NA	NA	NA	FALSE
15938	cg25646471	-0.00000496	0.0000174	-0.284139591	0.7764931	loss	ns	0.000168436	0.0000296	5.683686691	3.04E-08	pos	yes	0.022994908	0.008682052	2.648556896	0.008497501	pos	ns	2.070708787	-0.0000139	0.000298575	-0.046465692	0.962968997	neg	ns	0.672207054	Dmd	Dmd_Exon	X	83928764	83928813	83928812	83928813	50	-	GCTAACTGCCCTGGGCCCTGTATTGGTTTTGCTCAATAGGAAATTGATCG	Exon (Dmd-203/Dmd, exon 41 of 79)	20	82948903	85206141	2257239	1	Dmd-203	979861	Dmd-203;Dmd-215;Dmd-209	Dmd;Dmd;Dmd	0;0;0	TRUE
5679	cg26263695	-0.0000362	0.0000101	-3.580469868	0.000397991	loss	ns	-0.0000973	0.0000172	-5.67183355	3.24E-08	neg	yes	0.030346997	0.005027077	6.036708654	4.49E-09	pos	ns	8.347847807	-0.000707189	0.000172881	-4.090618487	0.0000549	neg	ns	0.86260772	Mapkap1	Mapkap1_Intron	2	34535281	34535330	34535281	34535282	50	+	CGCCGTTTGATAACCAGCTCTCTGGATGCCCATCACTGGCCGCAGAGATA	Intron (Mapkap1-204/Mapkap1, intron 6 of 10)	2	34406862	34623475	216614	1	Mapkap1-204	128419	Mapkap1-204;Mapkap1-202;Mapkap1-201;Mapkap1-209;Mapkap1-203;Mapkap1-207	Mapkap1;Mapkap1;Mapkap1;Mapkap1;Mapkap1;Mapkap1	0;0;0;0;0;0	TRUE
17996	cg20086357	0.0000442	0.0000134	3.292198314	0.001108906	gain	ns	0.000129198	0.0000228	5.666574518	3.33E-08	pos	yes	0.033722246	0.006679611	5.048534748	0.000000761	pos	ns	6.118769103	-0.000721929	0.000229711	-3.142768815	0.00183539	neg	ns	0.34985172	Arx	Arx_Intron	X	93292237	93292286	93292285	93292286	50	+	ATTTGGTTGTTAGACAAATCCGCTCAGTTCCAAGCAGGTATTTGGCTGCG	Intron (Arx-201/Arx, intron 3 of 4)	20	93286496	93298357	11862	1	Arx-201	5741	Arx-203;Arx-201;Arx-202	Arx;Arx;Arx	5792;0;0	TRUE
6841	cg09556778	0.0000892	0.0000083	10.75196346	3.98E-23	gain	yes	-0.0000798	0.0000141	-5.661752214	3.42E-08	neg	yes	0.012044909	0.004130357	2.916190701	0.003801828	pos	ns	2.420007513	-0.000498677	0.000142043	-3.510757703	0.000513144	neg	ns	0.708985437	Nr6a1	Nr6a1_Exon	2	38739015	38739064	38739015	38739016	50	+	CGTGTAATCCTTGATTGAGAGCTCGCAGAAGAAAGGCAGTTTCTTGATCC	Exon (Nr6a1-202/Nr6a1, exon 9 of 12)	2	38723370	38927688	204319	2	Nr6a1-202	188624	Nr6a1-202;Nr6a1-210;Nr6a1-201;Nr6a1-204;Nr6a1-205;Nr6a1-207;Nr6a1-206;Nr6a1-208;Nr6a1-209;Nr6a1-211	Nr6a1;Nr6a1;Nr6a1;Nr6a1;Nr6a1;Nr6a1;Nr6a1;Nr6a1;Nr6a1;Nr6a1	0;0;0;0;0;45456;46047;0;45405;24701	TRUE
22811	cg08815464	0.0000294	0.0000247	1.190748191	0.23466343	gain	ns	0.000237136	0.000042	5.647486412	3.68E-08	pos	yes	0.035955687	0.012301559	2.922856054	0.003723551	pos	ns	2.429042739	-0.000150384	0.00042305	-0.355475986	0.722474786	neg	ns	0.598233175	Faah	Faah_Intron	4	115972603	115972652	115972651	115972652	50	-	GGCTGCTGGGGAAAGTGACACGGGCTCCAGGTGATGGATTCGTGCCATCG	Intron (Faah-202/Faah, intron 13 of 14)	4	115967145	116017675	50531	2	Faah-202	45023	Faah-202	Faah	0	TRUE
2908	cg23603747	-0.00000957	0.00000522	-1.834540316	0.06753205	loss	ns	0.00005	0.00000886	5.639619148	3.84E-08	pos	yes	0.004495027	0.002595945	1.731556839	0.084347342	pos	ns	1.0739286	-0.00000664	0.0000893	-0.074348396	0.940781121	neg	ns	0.911115495	Lrmda	Lrmda_Intron	14	22046216	22046265	22046216	22046217	50	-	CGTTTTGCATTTTAATGACAAATCAAGTACGCTAACTTGCATTTGAAACG	Intron (Lrmda-201/Lrmda, intron 2 of 6)	14	22019712	23056085	1036374	1	Lrmda-201	26504	Lrmda-201;Lrmda-204;Lrmda-203;Lrmda-206	Lrmda;Lrmda;Lrmda;Lrmda	0;0;0;0	TRUE
19558	cg14572301	0.0000287	0.0000116	2.46747025	0.01414712	gain	ns	0.00011149	0.0000198	5.638854824	3.85E-08	pos	yes	0.027240891	0.005792475	4.702806641	0.00000387	pos	ns	5.412441526	-0.000575846	0.000199203	-2.890751075	0.004114597	neg	ns	0.488622835	Tmem28	Tmem28_Exon	X	99821496	99821545	99821544	99821545	50	-	TGGACGCAGCTTGCACCAAATTGCAATCTTTGCAGAGACTTTTCGAACCG	Promoter (<=1kb)	20	99821021	99848790	27770	1	Tmem28-201	475	Tmem28-201	Tmem28	0	TRUE
25336	cg14676280	-0.0000593	0.00000951	-6.238025755	1.45E-09	loss	yes	-0.0000908	0.0000162	-5.621937684	4.21E-08	neg	yes	0.026509034	0.004734297	5.599359709	4.74E-08	pos	ns	7.323927295	-0.000602296	0.000162812	-3.699329641	0.000255671	neg	ns	0.837986319	Srrm1	Srrm1_Exon	4	135346367	135346416	135346415	135346416	50	+	ACACTCACTCTGCTGTGACCTAATAAGGTGATGGTGCTATACTTCAGACG	Exon (Srrm1-212/Srrm1, exon 3 of 16)	4	135320484	135353321	32838	2	Srrm1-203	6905	Srrm1-203;Srrm1-202;Srrm1-208;Srrm1-201;Srrm1-212;Srrm1-204;Srrm1-214;Srrm1-205;Srrm1-207;Srrm1-209;Srrm1-206	Srrm1;Srrm1;Srrm1;Srrm1;Srrm1;Srrm1;Srrm1;Srrm1;Srrm1;Srrm1;Srrm1	0;0;0;0;0;0;0;0;0;0;0	TRUE
6818	cg04411685	0.0000147	0.00000549	2.68179738	0.007715103	gain	ns	-0.0000523	0.00000932	-5.612705104	4.42E-08	neg	yes	0.000341468	0.002731548	0.125009046	0.900597415	pos	ns	0.045469304	-0.000151013	0.0000939	-1.607586935	0.10894366	neg	ns	0.821727693	Psmb7	Psmb7_Intron	2	38595091	38595140	38595139	38595140	50	+	CGCTACATGACAAATGGGCAGCACTTGTAAAAGGCACAAAGAGGTCCACG	Intron (Psmb7-201/Psmb7, intron 6 of 7)	2	38588036	38644087	56052	2	Psmb7-201	48947	Nek6-201;Psmb7-201	Nek6;Psmb7	0;0	TRUE
17541	cg03866292	0.0000409	0.0000571	0.716389836	0.474289999	gain	ns	0.000544312	0.0000971	5.607247722	4.55E-08	pos	yes	0.079932027	0.028439076	2.810640767	0.005258913	pos	ns	2.279104014	0.000696836	0.000978017	0.712498332	0.476692163	pos	ns	0.39598174	Mtch2	Mtch2_Exon	2	90847307	90847356	90847307	90847308	50	-	CGCGGCCAGTCAGGTGCTCCTGGGCTCCGGTCTCACCATCCTGTCCCAGC	Promoter (<=1kb)	2	90847155	90866810	19656	1	Mtch2-205	152	Mtch2-205;Mtch2-203;Mtch2-210;Mtch2-211;Mtch2-209;Mtch2-202;Mtch2-201;Mtch2-208	Mtch2;Mtch2;Mtch2;Mtch2;Mtch2;Mtch2;Mtch2;Mtch2	0;0;0;0;0;0;0;-4835	TRUE
22816	cg07085643	0.0000276	0.0000175	1.575300269	0.116207097	gain	ns	0.00016656	0.0000298	5.593819454	4.88E-08	pos	yes	0.017330177	0.008723252	1.986664786	0.047839672	pos	ns	1.320211809	0.000374013	0.000299992	1.246742023	0.213433293	pos	ns	0.712773468	Faah	Faah_Intron	4	115972780	115972829	115972780	115972781	50	-	CGCAGGCATGGAAAATAGAGTGTCTGGGATTAATGATATTGAAAATGATA	Intron (Faah-202/Faah, intron 13 of 14)	4	115967145	116017675	50531	2	Faah-202	44846	Faah-202	Faah	0	TRUE
4941	cg17186761	0.0000224	0.00000585	3.832071801	0.000153846	gain	ns	-0.0000556	0.00000994	-5.593216971	0.000000049	neg	yes	0.014814323	0.002913076	5.085456783	0.000000636	pos	ns	6.19651881	-0.000545818	0.00010018	-5.448346738	0.000000104	neg	yes	0.885765545	Marchf6	Marchf6_Exon	15	31500937	31500986	31500985	31500986	50	+	AGCGTCAGTAGTGAGCTCACGGAGCCAGTAAACAAGCACTTGTAGATGCG	Exon (Marchf6-201/Marchf6, exon 5 of 26)	15	31455891	31531053	75163	2	Marchf6-201	30067	Marchf6-201;Marchf6-202;Marchf6-204	Marchf6;Marchf6;Marchf6	0;0;0	TRUE
27962	cg17612293	0.0000054	0.0000104	0.519270114	0.603942918	gain	ns	0.0000989	0.0000177	5.59205968	4.93E-08	pos	yes	0.014791833	0.005178733	2.856264632	0.004576072	pos	ns	2.339507185	0.0000725	0.000178096	0.407339237	0.684039983	pos	ns	0.593209293	Gm21362	Gm21362_Intergenic_downstream	1	193989180	193989229	193989228	193989229	50	-	AGGAAGAATTGCCCTCCCATCTCTCTTGTAAATGTCGACAGGTTCCATCG	Distal Intergenic	1	193867009	193867936	928	1	Gm21362-201	122220	NA	NA	NA	FALSE
12894	cg26717772	-0.000000634	0.0000122	-0.051884086	0.958654471	loss	ns	0.000116153	0.0000208	5.591847312	4.93E-08	pos	yes	0.01829699	0.006085467	3.006669725	0.002857282	pos	ns	2.544046916	-0.000363258	0.000209279	-1.735759722	0.083599973	neg	ns	0.404583916	Iqcj	Iqcj_Exon	3	68055350	68055399	68055398	68055399	50	+	GCTGAGCAGCTCTGTCAGCATGAACACCTTCTCCGACAGCAGCACACCCG	Exon (Iqcj-201/Iqcj, exon 4 of 4)	3	67892220	68056593	164374	1	Iqcj-201	163130	Iqcj-201;Iqschfp-201	Iqcj;Iqschfp	0;0	TRUE
24918	cg24549671	0.000152952	0.0000188	8.132654056	1.02E-14	gain	yes	-0.000178597	0.000032	-5.589754572	4.99E-08	neg	yes	0.072839532	0.009360512	7.781575806	1.08E-13	pos	yes	12.96831537	-0.002443819	0.000321907	-7.591686979	3.74E-13	neg	yes	0.517179011	Kpna6	Kpna6_Exon	4	129648099	129648148	129648147	129648148	50	-	AGTAGTGCTCAATGAGGTCGAAGGCCTTCTGGTAGATCTCCTGGTTCTCG	Exon (Kpna6-202/Kpna6, exon 14 of 14)	4	129643980	129672767	28788	2	Kpna6-202	24619	Kpna6-202;Kpna6-201	Kpna6;Kpna6	0;0	TRUE
17860	cg15051610	0.000057	0.00000564	10.11768674	5.58E-21	gain	yes	-0.0000535	0.00000958	-5.58733886	5.05E-08	neg	yes	-0.000448904	0.00280547	-0.160010306	0.872977166	neg	ns	0.058997116	-0.000158176	0.0000965	-1.639474054	0.102128934	neg	ns	0.875646224	Phf21a	Phf21a_Intron	2	92165510	92165559	92165510	92165511	50	-	CGGATTGGCAGCTGGGACTGAAGGCGATAGAAATAAGCTATTGATCAAGG	Intron (Phf21a-201/Phf21a, intron 1 of 15)	2	92093117	92364666	271550	1	Phf21a-201	72393	Phf21a-201;Phf21a-202;Phf21a-204;Phf21a-209	Phf21a;Phf21a;Phf21a;Phf21a	0;0;0;0	TRUE
19274	cg23437216	0.000118881	0.0000129	9.228843573	4.40E-18	gain	yes	-0.000121787	0.0000219	-5.565123946	5.67E-08	neg	yes	0.0467354	0.006411246	7.289597014	2.60E-12	pos	yes	11.58462498	-0.001076654	0.000220482	-4.883179351	0.00000167	neg	yes	0.548292498	Lmbr1l	Lmbr1l_Exon	15	98904769	98904818	98904817	98904818	50	+	AAATTGCCCAGCCAGTTGAAGCGTCCAAAGTCACCCAGCAGGTCAAAGCG	Exon (Lmbr1l-201/Lmbr1l, exon 16 of 17)	15	98903917	98918231	14315	2	Lmbr1l-201	13413	Lmbr1l-201;Lmbr1l-202;Lmbr1l-208;Lmbr1l-203;Lmbr1l-205;Lmbr1l-207	Lmbr1l;Lmbr1l;Lmbr1l;Lmbr1l;Lmbr1l;Lmbr1l	0;0;0;4119;4445;4642	TRUE
13484	cg19447278	0.0000358	0.00000801	4.465674919	0.0000112	gain	ns	-0.0000756	0.0000136	-5.559870698	5.83E-08	neg	yes	0.026953401	0.003986128	6.761799408	6.78E-11	pos	yes	10.16866066	-0.000651212	0.000137083	-4.750504345	0.00000311	neg	ns	0.863995901	Tlk1	Tlk1_Exon	2	70768891	70768940	70768891	70768892	50	+	CGTCACTTGCACAGTCCTTTCAGCTGCCTGCCAGTTGTTTCTGTGGAAGG	Exon (Tlk1-205/Tlk1, exon 4 of 22)	2	70712407	70825397	112991	2	Tlk1-205	56457	Tlk1-205;Tlk1-201;Tlk1-203;Tlk1-204;Tlk1-202	Tlk1;Tlk1;Tlk1;Tlk1;Tlk1	0;0;0;0;0	TRUE
19389	cg25996747	0.0000363	0.0000157	2.320840755	0.020943962	gain	ns	0.000147695	0.0000266	5.554337811	0.00000006	pos	yes	0.034002119	0.007790234	4.364710658	0.0000174	pos	ns	4.760363914	-0.000591065	0.000267906	-2.206244825	0.028099961	neg	ns	0.419311937	Efnb1	Efnb1_Intergenic_downstream	X	99199396	99199445	99199396	99199397	50	-	CGGGGCCTGCTCAGGAAGCAGGAGCTGAGCTGAGATAATGGGTCTGAAAT	Distal Intergenic	20	99138131	99147230	9100	1	Efnb1-202	61314	NA	NA	NA	FALSE
11354	cg01370575	0.00000712	0.00000914	0.778947878	0.436604619	gain	ns	-0.0000861	0.0000155	-5.550512614	6.12E-08	neg	yes	0.025226241	0.004546606	5.548366902	6.19E-08	pos	ns	7.208343157	-0.000995785	0.000156357	-6.368646917	6.87E-10	neg	yes	0.879243816	Clk3	Clk3_Exon	9	57758701	57758750	57758701	57758702	50	+	CGCTTACTGCTCTGTTGGCTTCTCTGCATGCACCGCCCCCCGAAACGCCA	Exon (Clk3-207/Clk3, exon 3 of 12)	9	57750624	57765103	14480	2	Clk3-207	6353	Clk3-207;Clk3-201;Clk3-205;Clk3-203;Clk3-206;Clk3-209;Clk3-208;Clk3-204	Clk3;Clk3;Clk3;Clk3;Clk3;Clk3;Clk3;Clk3	0;0;0;0;-3380;0;5558;6103	TRUE
11810	cg16695688	0.000025	0.0000115	2.16460316	0.031181091	gain	ns	0.000108643	0.0000196	5.546865624	6.24E-08	pos	yes	0.02942927	0.005738138	5.128714326	0.000000515	pos	ns	6.288171846	-0.000514585	0.000197334	-2.607684571	0.009556831	neg	ns	0.383500623	Gm14660	Gm14660_Intergenic_downstream	X	60831512	60831561	60831512	60831513	50	+	CGTTTTGTGTTTGCCAAACAAAGCATGAAGGCAGAGTGAGTAAAGGGGGC	Distal Intergenic	20	60818208	60818782	575	1	Gm14660-201	13304	NA	NA	NA	FALSE
3995	cg12034923	0.0000325	0.00000754	4.308515819	0.0000221	gain	ns	-0.000071	0.0000128	-5.543567326	6.35E-08	neg	yes	-0.014003254	0.003750675	-3.73352902	0.000224619	neg	ns	3.648552568	0.000201895	0.000128985	1.565255103	0.118543307	pos	ns	0.770638649	L3mbtl3	L3mbtl3_Exon	10	26327684	26327733	26327732	26327733	50	+	CACCAATAGTCATAGCTCTCATCCCAGTTGTCAAAATGTACCAGGAAACG	Exon (L3mbtl3-202/L3mbtl3, exon 11 of 21)	10	26274468	26373956	99489	2	L3mbtl3-202	46223	L3mbtl3-202;L3mbtl3-201;L3mbtl3-203	L3mbtl3;L3mbtl3;L3mbtl3	0;0;0	TRUE
19560	cg13102615	0.0000229	0.0000134	1.711923702	0.087910834	gain	ns	0.000126054	0.0000227	5.543288253	6.36E-08	pos	yes	0.022468801	0.006662025	3.372668088	0.00083886	pos	ns	3.076310513	-0.000434068	0.000229107	-1.894612745	0.059074174	neg	ns	0.494400932	Tmem28	Tmem28_Exon	X	99821828	99821877	99821828	99821829	50	+	CGACACGCTCAGGAAAAATATGACGAGTTCGACCTCGTGCTGCATAAATA	Promoter (<=1kb)	20	99821021	99848790	27770	1	Tmem28-201	807	Tmem28-201	Tmem28	0	TRUE
25159	cg02115892	0.0000182	0.0000196	0.929734095	0.353232182	gain	ns	-0.000183922	0.0000333	-5.522322402	7.09E-08	neg	yes	0.022803499	0.009757278	2.337075758	0.020071664	pos	ns	1.697416616	0.00048049	0.000335552	1.431939208	0.153168696	pos	ns	0.457510254	Wasf2	Wasf2_threeUTR	4	133198116	133198165	133198116	133198117	50	-	CGATGTGCTATGTTCTCATCCTACAGTTGGTTTGGTAATGATCTGCAAGT	3' UTR	4	133130505	133199756	69252	1	Wasf2-201	67611	Wasf2-201;Wasf2-202	Wasf2;Wasf2	0;0	TRUE
23070	cg24677551	-0.0000164	0.0000176	-0.932532027	0.351787358	loss	ns	-0.000164903	0.0000299	-5.520426209	7.16E-08	neg	yes	0.042574514	0.008751319	4.864925428	0.00000182	pos	ns	5.738740245	-0.002153723	0.000300957	-7.156244624	6.03E-12	neg	yes	0.719003427	Rnf220	Rnf220_Exon	4	117272681	117272730	117272681	117272682	50	-	CGTCCGAGCCTTTTATTACTGTCTCCGGGCGACATTTTAATGGCTGCTCC	Exon (Rnf220-211/Rnf220, exon 2 of 2)	4	117271463	117497052	225590	2	Rnf220-201	224322	Rnf220-201;Rnf220-203;Rnf220-212;Rnf220-202;Rnf220-205;Rnf220-214;Rnf220-211;Rnf220-209;Tmem53-201;Tmem53-204;Tmem53-203;Tmem53-206;Tmem53-202;Tmem53-205	Rnf220;Rnf220;Rnf220;Rnf220;Rnf220;Rnf220;Rnf220;Rnf220;Tmem53;Tmem53;Tmem53;Tmem53;Tmem53;Tmem53	0;0;0;0;0;0;0;0;20730;20641;20639;20619;20341;7310	TRUE
10317	cg14064981	-0.0000124	0.0000152	-0.820475832	0.412575345	loss	ns	0.00014211	0.0000258	5.513985433	0.000000074	pos	yes	0.02632403	0.007550514	3.486389232	0.000560281	pos	ns	3.251593955	-0.000233761	0.000259662	-0.900253729	0.368684048	neg	ns	0.484331216	Phf6	Phf6_Intron	X	52913418	52913467	52913466	52913467	50	-	AGTGCGAAGCATGTAATAATATCGTGCAACCAAATTCAGGTGCCCTTCCG	Intron (Phf6-201/Phf6, intron 1 of 10)	20	52912266	52956943	44678	1	Phf6-201	1152	Phf6-201;Phf6-202;Phf6-203	Phf6;Phf6;Phf6	0;0;0	TRUE
2608	cg23117269	0.0000915	0.00000685	13.36131732	1.80E-32	gain	yes	-0.0000641	0.0000116	-5.507510272	7.65E-08	neg	yes	-0.003550467	0.003407416	-1.041982138	0.298231882	neg	ns	0.525445932	0.00000867	0.000117181	0.073957495	0.941091905	pos	ns	0.829564143	Aftph	Aftph_threeUTR	11	20696787	20696836	20696787	20696788	50	-	CGGGCCCAAAGAAATCAAGGTTCAGAAGAGTGGAACCTCCACTAGCTTGA	3' UTR	11	20685084	20727607	42524	2	Aftph-205	30771	Aftph-205;Aftph-201;Aftph-208;Aftph-209;Aftph-203;Aftph-207;Aftph-206	Aftph;Aftph;Aftph;Aftph;Aftph;Aftph;Aftph	0;0;0;0;-3985;0;0	TRUE
14320	cg12571830	0.0000513	0.00000641	8.014117139	2.28E-14	gain	yes	-0.0000599	0.0000109	-5.506054681	7.71E-08	neg	yes	-0.006936613	0.003188803	-2.17530321	0.030362783	neg	ns	1.517658421	0.000324942	0.000109663	2.963101189	0.003281381	pos	ns	0.84943943	Smg6	Smg6_Intron	11	75156592	75156641	75156640	75156641	50	+	AGCAAAGCTGGTTCCCGTTATTGGTAAACACTCAGCCCTGGCAGATAACG	Intron (Smg6-201/Smg6, intron 16 of 18)	11	74925823	75164448	238626	1	Smg6-201	230769	Smg6-201;Smg6-202;Smg6-206	Smg6;Smg6;Smg6	0;0;0	TRUE
21703	cg22844979	-0.0000277	0.0000202	-1.373517492	0.170584013	loss	ns	0.000188572	0.0000343	5.50487043	7.76E-08	pos	yes	0.010196731	0.010035691	1.016046693	0.310399479	pos	ns	0.508079017	-0.000176886	0.000345127	-0.512525789	0.608648055	neg	ns	0.281713058	Slitrk1	Slitrk1_threeUTR	14	108909992	108910041	108910040	108910041	50	-	AAAACATTTTCGCTTTAATACTGAAAAAATATGCCATTATAAAATCCTCG	3' UTR	14	108908800	108914158	5359	2	Slitrk1-201	4117	Slitrk1-201	Slitrk1	0	TRUE
15183	cg00909225	0.000141061	0.0000183	7.702724963	1.81E-13	gain	yes	-0.000170973	0.0000311	-5.495486346	8.14E-08	neg	yes	0.049187362	0.009114633	5.39652712	0.000000135	pos	ns	6.868971886	-0.001928758	0.000313451	-6.153291131	2.34E-09	neg	yes	0.532946229	Ddx17	Ddx17_Exon	15	79530103	79530152	79530151	79530152	50	+	GGCTGTGCAAACTGTTGTGACATCAGTGGCTGTGGCTGCTGCCCAGACCG	Exon (Ddx17-201/Ddx17, exon 13 of 13)	15	79527736	79546741	19006	2	Ddx17-201	16589	Ddx17-201;Ddx17-203;Ddx17-204;Ddx17-202;Kdelr3-201	Ddx17;Ddx17;Ddx17;Ddx17;Kdelr3	0;0;0;0;13692	TRUE
22812	cg04770203	0.0000161	0.0000245	0.656906942	0.511728128	gain	ns	0.000228985	0.0000417	5.494789539	8.17E-08	pos	yes	0.029235321	0.012208823	2.394606107	0.01723182	pos	ns	1.763668854	-0.0000135	0.00041986	-0.032182311	0.974347373	neg	ns	0.632571291	Faah	Faah_Intron	4	115972611	115972660	115972659	115972660	50	+	GGGAAAGTGACACGGGCTCCAGGTGATGGATTCGTGCCATCGGGGAGCCG	Intron (Faah-202/Faah, intron 13 of 14)	4	115967145	116017675	50531	2	Faah-202	45015	Faah-202	Faah	0	TRUE
11453	cg11320734	0.000014	0.00000499	2.801204662	0.005411196	gain	ns	-0.0000466	0.00000848	-5.493722775	8.22E-08	neg	yes	-0.00099239	0.002483728	-0.399556729	0.689758174	neg	ns	0.161303144	-0.000222531	0.0000854	-2.605284419	0.009622568	neg	ns	0.86278768	Hnrnpk	Hnrnpk_threeUTR	13	58396166	58396215	58396214	58396215	50	-	GTTCAATGGCACTATGACATACATTTAAGCATTCCACAGCATCAGATTCG	3' UTR	13	58391142	58403343	12202	2	Hnrnpk-202	7128	Hnrnpk-202;Hnrnpk-224;Hnrnpk-221;Hnrnpk-232;Hnrnpk-216;Hnrnpk-201;Hnrnpk-205;Hnrnpk-217;Hnrnpk-206;Hnrnpk-209;Hnrnpk-213;Hnrnpk-227;Hnrnpk-234;Hnrnpk-233;Hnrnpk-228;Hnrnpk-214;Hnrnpk-215;Hnrnpk-211;Hnrnpk-208;Hnrnpk-212;Hnrnpk-231;Hnrnpk-230;Hnrnpk-203;Hnrnpk-218;Hnrnpk-226;Hnrnpk-207;Hnrnpk-219;Hnrnpk-225;Hnrnpk-229;Hnrnpk-223;Hnrnpk-220;Hnrnpk-210;Hnrnpk-204;Hnrnpk-222	Hnrnpk;Hnrnpk;Hnrnpk;Hnrnpk;Hnrnpk;Hnrnpk;Hnrnpk;Hnrnpk;Hnrnpk;Hnrnpk;Hnrnpk;Hnrnpk;Hnrnpk;Hnrnpk;Hnrnpk;Hnrnpk;Hnrnpk;Hnrnpk;Hnrnpk;Hnrnpk;Hnrnpk;Hnrnpk;Hnrnpk;Hnrnpk;Hnrnpk;Hnrnpk;Hnrnpk;Hnrnpk;Hnrnpk;Hnrnpk;Hnrnpk;Hnrnpk;Hnrnpk;Hnrnpk	0;0;0;0;0;0;0;-2298;-1381;-2191;-968;-2082;-2277;-1996;-1470;0;-446;0;0;0;0;0;0;0;0;0;0;0;0;0;0;0;6287;5840	TRUE
16277	cg13896129	0.0000671	0.0000086	7.798455742	9.62E-14	gain	yes	-0.00008	0.0000146	-5.477239808	8.94E-08	neg	yes	-0.006728795	0.00428026	-1.572052986	0.11695831	neg	ns	0.931968915	0.000169049	0.000147198	1.148448099	0.251669029	pos	ns	0.833564535	Lrpprc	Lrpprc_Intron	17	84709558	84709607	84709606	84709607	50	-	ATTGGTCCCACGCCTCAATTTGACACAGGGAGTCTACACAAACACAGCCG	Intron (Lrpprc-201/Lrpprc, intron 34 of 37)	17	84705247	84790558	85312	2	Lrpprc-201	80951	Lrpprc-201;Lrpprc-207	Lrpprc;Lrpprc	0;0	TRUE
13476	cg19723283	0.0000607	0.00000896	6.776546057	6.21E-11	gain	yes	-0.000083	0.0000152	-5.453244841	0.000000101	neg	yes	0.016994225	0.004458065	3.812018703	0.00016627	pos	ns	3.779186679	-0.000888138	0.000153312	-5.792993835	0.000000017	neg	yes	0.879933354	Xpo7	Xpo7_Exon	14	70692748	70692797	70692748	70692749	50	-	CGGGCCAGTAGTCTGCAAAACTCATGGTAATTGTTTGGGTCTGATAAACT	Exon (Xpo7-202/Xpo7, exon 10 of 28)	14	70654246	70766628	112383	2	Xpo7-202	73831	Xpo7-202;Xpo7-201;Xpo7-206;Xpo7-203;Xpo7-204	Xpo7;Xpo7;Xpo7;Xpo7;Xpo7	0;0;0;0;0	TRUE
17054	cg05193157	0.0000123	0.0000165	0.746878667	0.455702884	gain	ns	0.000152473	0.000028	5.451671958	0.000000102	pos	yes	0.028434054	0.008193691	3.47023768	0.000593725	pos	ns	3.226414489	-0.000243737	0.00028178	-0.86498849	0.387713968	neg	ns	0.328981686	Il1rapl1	Il1rapl1_Promoter	X	88115998	88116047	88116046	88116047	50	-	CCAATGGATATTTTAGTACTAGCCAATCCACAGACAGCCACCGCTTTGCG	Promoter (<=1kb)	20	86740870	88115645	1374776	2	Il1rapl1-203	-402	Il1rapl1-203;Il1rapl1-202	Il1rapl1;Il1rapl1	0;0	FALSE
17999	cg04118889	0.0000307	0.0000134	2.295587489	0.022366805	gain	ns	0.000123855	0.0000227	5.444464275	0.000000106	pos	yes	0.030973755	0.006664636	4.647478906	0.00000498	pos	ns	5.303089408	-0.000413082	0.000229196	-1.80230858	0.07246812	neg	ns	0.46940161	Arx	Arx_threeUTR	X	93297441	93297490	93297441	93297442	50	-	CGAAAGGTCACCTCACTCAGCACCACTCAAGACCAAATGGAAACAGAGGA	3' UTR	20	93286496	93298357	11862	1	Arx-201	10945	Arx-201;Arx-202	Arx;Arx	0;0	TRUE
16917	cg18662889	0.000137001	0.0000199	6.894765158	3.03E-11	gain	yes	-0.000183567	0.0000338	-5.437889314	0.000000109	neg	yes	0.095559103	0.009889679	9.662508271	1.77E-19	pos	yes	18.75284239	-0.002502164	0.000340105	-7.357028656	1.70E-12	neg	yes	0.634194539	Gigyf2	Gigyf2_fiveUTR	1	87386537	87386586	87386585	87386586	50	+	GTCTTGTCAAAATTCTCCATCTTGATTTGATATTCACCTTTGGAACCTCG	5' UTR	1	87327003	87450796	123794	1	Gigyf2-201	59534	Gigyf2-201;Gigyf2-205;Gigyf2-202;Gigyf2-214;Gigyf2-210;Gigyf2-206;Gigyf2-217;Gigyf2-218;Gigyf2-215;Kcnj13-201;Kcnj13-202	Gigyf2;Gigyf2;Gigyf2;Gigyf2;Gigyf2;Gigyf2;Gigyf2;Gigyf2;Gigyf2;Kcnj13;Kcnj13	0;0;0;0;0;0;0;0;0;0;2803	TRUE
23068	cg22819840	0.0000414	0.0000161	2.563381579	0.010837364	gain	ns	-0.00014923	0.0000274	-5.439306909	0.000000109	neg	yes	0.037429158	0.008037691	4.656705326	0.00000477	pos	ns	5.32125357	-0.001536855	0.000276416	-5.559945982	5.83E-08	neg	yes	0.708055873	Rnf220	Rnf220_Exon	4	117272642	117272691	117272642	117272643	50	+	CGAGATTACACGCGGCCTTTGATCAGGACACAGAGCCCACGTCCGAGCCT	Exon (Rnf220-211/Rnf220, exon 2 of 2)	4	117271463	117497052	225590	2	Rnf220-201	224361	Rnf220-201;Rnf220-203;Rnf220-212;Rnf220-202;Rnf220-205;Rnf220-214;Rnf220-211;Rnf220-209;Tmem53-201;Tmem53-204;Tmem53-203;Tmem53-206;Tmem53-202;Tmem53-205	Rnf220;Rnf220;Rnf220;Rnf220;Rnf220;Rnf220;Rnf220;Rnf220;Tmem53;Tmem53;Tmem53;Tmem53;Tmem53;Tmem53	0;0;0;0;0;0;0;0;20691;20602;20600;20580;20302;7271	TRUE
2076	cg16170739	0.0000854	0.00000688	12.41803639	5.17E-29	gain	yes	-0.0000635	0.0000117	-5.432557828	0.000000112	neg	yes	-0.011586494	0.003423677	-3.384224935	0.000805545	neg	ns	3.093910294	0.00029644	0.00011774	2.517752842	0.012314333	pos	ns	0.796278813	St7	St7_Exon	6	17905699	17905748	17905747	17905748	50	-	TCCTGTAGATCGCCAGTACCTACTGCAACATCTTTTCTCCCTACACAGCG	Exon (St7-215/St7, exon 12 of 13)	6	17693947	17943022	249076	1	St7-209	211752	St7-209;St7-208;St7-202;St7-205;St7-219;St7-217;St7-207;St7-201;St7-204;St7-215;St7-203;St7-206;St7-220;St7-216;St7-221;St7-218;St7-211	St7;St7;St7;St7;St7;St7;St7;St7;St7;St7;St7;St7;St7;St7;St7;St7;St7	0;0;0;0;0;0;0;0;0;0;0;0;0;0;65143;0;0	TRUE
22813	cg15610892	0.0000349	0.000027	1.295059567	0.196263336	gain	ns	0.0002487	0.0000458	5.431223819	0.000000113	pos	yes	0.026564115	0.013415126	1.980161341	0.048569348	pos	ns	1.313637723	0.000219225	0.000461345	0.475186868	0.634988411	pos	ns	0.671826084	Faah	Faah_Intron	4	115972615	115972664	115972663	115972664	50	+	AAGTGACACGGGCTCCAGGTGATGGATTCGTGCCATCGGGGAGCCGGGCG	Intron (Faah-202/Faah, intron 13 of 14)	4	115967145	116017675	50531	2	Faah-202	45011	Faah-202	Faah	0	TRUE
20450	cg15143618	0.000115561	0.0000173	6.671041581	1.17E-10	gain	yes	-0.000159765	0.0000294	-5.428812401	0.000000115	neg	yes	0.035301776	0.008621728	4.094512832	0.000054	pos	ns	4.267370366	-0.000845524	0.000296501	-2.851677476	0.004640882	neg	ns	0.671853494	Csde1	Csde1_Exon	3	103040477	103040526	103040525	103040526	50	-	TCTCCAGCTGCCCCGGGTCAGAGTCCAACAGGGAGTGTATGCTACGAACG	Exon (Csde1-201/Csde1, exon 5 of 20)	3	103020426	103058186	37761	1	Csde1-201	20051	Csde1-201;Csde1-211;Csde1-207;Csde1-214;Csde1-215;Csde1-216;Csde1-206;Csde1-212;Csde1-213;Csde1-205;Csde1-217;Csde1-202;Csde1-210;Csde1-209	Csde1;Csde1;Csde1;Csde1;Csde1;Csde1;Csde1;Csde1;Csde1;Csde1;Csde1;Csde1;Csde1;Csde1	0;0;0;0;0;0;0;0;0;0;0;0;0;-3016	TRUE
17034	cg05111574	0.000115569	0.00000816	14.1645165	1.82E-35	gain	yes	-0.0000752	0.0000139	-5.426437136	0.000000116	neg	yes	-0.005546063	0.004060859	-1.365736469	0.173011758	neg	ns	0.76192438	0.000378556	0.000139653	2.710698555	0.007088226	pos	ns	0.825950085	Mllt3	Mllt3_Intron	4	88030440	88030489	88030488	88030489	50	+	CCAATAAAGATTACGGATCAAATGGAAGATAACTACTAACCATTGTGTCG	Intron (Mllt3-201/Mllt3, intron 2 of 10)	4	87769925	88033364	263440	2	Mllt3-201	2875	Mllt3-201;Mllt3-203;Mllt3-205;Mllt3-206	Mllt3;Mllt3;Mllt3;Mllt3	0;0;0;0	TRUE
11403	cg19446833	0.0000558	0.0000127	4.40938126	0.0000143	gain	ns	0.000116379	0.0000215	5.414348156	0.000000123	pos	yes	0.033623472	0.006297181	5.339448346	0.000000181	pos	ns	6.743271338	-0.000624045	0.00021656	-2.88163342	0.004232288	neg	ns	0.359914644	Zic3	Zic3_fiveUTR	X	58030595	58030644	58030595	58030596	50	+	CGGTTTATGTGCGAGGAGTGAGTGATTGACTTTATCAGTCCAAGGACATT	Promoter (<=1kb)	20	58030643	58036559	5917	1	Zic3-201	0	Zic3-204;Zic3-201;Zic3-203;Zic3-202	Zic3;Zic3;Zic3;Zic3	0;0;0;0	TRUE
14480	cg12658208	-0.00000727	0.00000597	-1.216840536	0.224590485	loss	ns	-0.0000549	0.0000101	-5.412665359	0.000000125	neg	yes	0.012304829	0.002971957	4.14031207	0.0000448	pos	ns	4.349152715	-0.000509695	0.000102205	-4.986968494	0.00000102	neg	yes	0.685414976	Smarcb1	Smarcb1_Exon	10	75916760	75916809	75916760	75916761	50	-	CGTGAAGACGCACCCTTAGTGTTAGGTTTTGTTTTTTTACCATGTGACGA	Exon (Smarcb1-201/Smarcb1, exon 2 of 9)	10	75896769	75921617	24849	2	Smarcb1-201	4808	Smarcb1-201;Smarcb1-203;Smarcb1-205;Smarcb1-202;Smarcb1-204;Smarcb1-206	Smarcb1;Smarcb1;Smarcb1;Smarcb1;Smarcb1;Smarcb1	0;-2598;-188;0;0;-1596	TRUE
13571	cg11765988	-0.00000448	0.00000777	-0.576698937	0.564561363	loss	ns	0.0000714	0.0000132	5.411707078	0.000000125	pos	yes	0.018791528	0.003866937	4.859537718	0.00000187	pos	ns	5.727756259	-0.000316446	0.000132984	-2.379584448	0.017936922	neg	ns	0.3356992	Rmnd5a	Rmnd5a_Exon	6	71398383	71398432	71398383	71398384	50	-	CGGAGAGCCCCAGGAGGGCACAAGCATCCCGTGTAAAGATGTCACAGATA	Exon (Rmnd5a-201/Rmnd5a, exon 6 of 9)	6	71388634	71440637	52004	2	Rmnd5a-201	42205	Rmnd5a-201;Rmnd5a-205;Rmnd5a-204;Rmnd5a-203;Rmnd5a-202	Rmnd5a;Rmnd5a;Rmnd5a;Rmnd5a;Rmnd5a	0;0;-2101;-2196;-1185	TRUE
19254	cg18562542	0.0000127	0.000006	2.123452427	0.034507789	gain	ns	-0.0000551	0.0000102	-5.410687745	0.000000126	neg	yes	0.004319218	0.002985695	1.446637455	0.149008842	pos	ns	0.826787959	-0.000343922	0.000102678	-3.349529322	0.000909457	neg	ns	0.839100968	Tnpo1	Tnpo1_Exon	13	98850120	98850169	98850168	98850169	50	+	AACTGCTGTAGCATGGGGGCCACCTCTTGAGGACAAACGTAACCAAGACG	Exon (Tnpo1-201/Tnpo1, exon 20 of 24)	13	98839019	98891040	52022	2	Tnpo1-201	40871	Tnpo1-201;Tnpo1-202;Tnpo1-206;Tnpo1-204	Tnpo1;Tnpo1;Tnpo1;Tnpo1	0;0;0;0	TRUE
21146	cg25245209	-0.0000248	0.0000144	-1.723046592	0.085877295	loss	ns	0.00013229	0.0000245	5.41049391	0.000000126	pos	yes	0.044707069	0.007163216	6.241200816	1.43E-09	pos	ns	8.846160068	-0.000784573	0.000246342	-3.18488653	0.001595406	neg	ns	0.327157483	Gm17304	Gm17304_Intron	5	106561003	106561052	106561003	106561004	50	+	CGATGTTTGATTACACTTTAATAAAGTACAAGAAAACTGTCTGGCTGCCT	Intron (Gm28050-202/Gm28050-202, intron 1 of 2)	5	106609098	106609201	104	1	Gm17304-201	-48046	NA	NA	NA	TRUE
22303	cg19127048	-0.0000572	0.00000873	-6.552720461	2.35E-10	loss	yes	-0.0000802	0.0000148	-5.407668699	0.000000128	neg	yes	0.010425055	0.004343049	2.40040031	0.016966445	pos	ns	1.770409158	-0.00057539	0.000149357	-3.852443432	0.000142128	neg	ns	0.733086019	Setd5	Setd5_Exon	6	113110128	113110177	113110128	113110129	50	-	CGTCTAGCCCTGCATCATTGTTCTTGTTTTTATGTCCCAGTTGACCTTGG	Exon (Setd5-212/Setd5, exon 4 of 18)	6	113077365	113153435	76071	1	Setd5-201	32763	Setd5-209;Setd5-201;Setd5-206;Setd5-205;Setd5-203;Setd5-212;Setd5-202;Setd5-204;Setd5-210;Setd5-214;Setd5-207	Setd5;Setd5;Setd5;Setd5;Setd5;Setd5;Setd5;Setd5;Setd5;Setd5;Setd5	0;0;0;0;0;0;0;0;0;0;0	TRUE
14428	cg10512285	0.0000293	0.0000109	2.699247654	0.007330887	gain	ns	0.0000998	0.0000185	5.404657814	0.00000013	pos	yes	0.022474317	0.005407709	4.155977839	0.0000419	pos	ns	4.377294256	-0.000427518	0.000185971	-2.298846359	0.022178567	neg	ns	0.18525691	Rab39b	Rab39b_fiveUTR	X	75578185	75578234	75578185	75578186	50	-	CGCAAAGGTGATGAAATGGCAGCAGCATCAGCACCACGCACTCTGACTCA	Promoter (<=1kb)	20	75572046	75578231	6186	2	Rab39b-201	0	Rab39b-201	Rab39b	0	TRUE
19586	cg19940131	0.0000287	0.0000133	2.153870422	0.032020933	gain	ns	0.000122156	0.0000227	5.39270906	0.000000138	pos	yes	0.031928796	0.006636302	4.811233096	0.00000235	pos	ns	5.629706039	-0.000482545	0.000228222	-2.114368266	0.035281906	neg	ns	0.360303799	Eda	Eda_Exon	X	99975881	99975930	99975929	99975930	50	+	CGGGCGAAGGGAACAGCTGCCTGCTCTTCCTGGGTTTCTTTGGCCTCTCG	Promoter (<=1kb)	20	99975606	100311299	335694	1	Eda-211	275	Eda-211;Eda-208;Eda-209;Eda-202;Eda-203;Eda-206;Eda-205;Eda-207;Eda-204;Eda-201	Eda;Eda;Eda;Eda;Eda;Eda;Eda;Eda;Eda;Eda	0;0;0;0;0;0;0;0;0;0	TRUE
22809	cg06184921	0.00000928	0.0000242	0.382762831	0.702157932	gain	ns	0.000221935	0.0000412	5.388966041	0.000000141	pos	yes	0.032025899	0.012065292	2.654382479	0.008355429	pos	ns	2.07803125	-0.000104249	0.000414924	-0.251247356	0.801789335	neg	ns	0.488773472	Faah	Faah_Intron	4	115972575	115972624	115972623	115972624	50	-	ATTACCTCCTAAGTGCCCAAACAAATGTGGCTGCTGGGGAAAGTGACACG	Intron (Faah-202/Faah, intron 13 of 14)	4	115967145	116017675	50531	2	Faah-202	45051	Faah-202	Faah	0	TRUE
22814	cg16072358	0.0000222	0.0000175	1.266108268	0.206424931	gain	ns	0.000160365	0.0000298	5.387439687	0.000000142	pos	yes	0.012083931	0.008720567	1.385681735	0.166840179	pos	ns	0.777699352	0.000327563	0.0002999	1.092241809	0.275574937	pos	ns	0.769758262	Faah	Faah_Intron	4	115972719	115972768	115972719	115972720	50	+	CGCCACGAGCTGGTGATGAATATGTGTCACTTTACACGGCGCACACTCGG	Intron (Faah-202/Faah, intron 13 of 14)	4	115967145	116017675	50531	2	Faah-202	44907	Faah-202	Faah	0	TRUE
22306	cg12386526	-0.0000216	0.00000597	-3.621720728	0.000341779	loss	ns	-0.0000546	0.0000101	-5.385036724	0.000000143	neg	yes	0.001139982	0.002972319	0.383532868	0.701587599	pos	ns	0.153918096	-0.000363052	0.000102218	-3.55175379	0.000442127	neg	ns	0.762165402	Setd5	Setd5_Exon	6	113110654	113110703	113110654	113110655	50	-	CGAATTCTCTGCACTAGGTGAGAATTGCTGACAACAAGGAATGAGAGATT	Exon (Setd5-204/Setd5, exon 1 of 6)	6	113077365	113153435	76071	1	Setd5-201	33289	Setd5-209;Setd5-201;Setd5-206;Setd5-205;Setd5-203;Setd5-212;Setd5-202;Setd5-204;Setd5-210;Setd5-214;Setd5-207	Setd5;Setd5;Setd5;Setd5;Setd5;Setd5;Setd5;Setd5;Setd5;Setd5;Setd5	0;0;0;0;0;0;0;0;0;0;0	TRUE
5651	cg24886640	-0.0000569	0.0000121	-4.710893555	0.00000373	loss	ns	-0.00011014	0.0000205	-5.36687828	0.000000157	neg	yes	0.017606842	0.006012322	2.928459469	0.003658886	pos	ns	2.436651066	-0.000939045	0.000206763	-4.541645072	0.000008	neg	ns	0.588440058	Fam13b	Fam13b_Exon	18	34497992	34498041	34497992	34497993	50	+	CGTGGCGGACTATGAATGGAACCTCATTGTCTGGATGTCCTCCCTGCTGC	Exon (Fam13b-201/Fam13b, exon 3 of 21)	18	34442351	34506823	64473	2	Fam13b-201	8782	Fam13b-201;Fam13b-206;Fam13b-212;Fam13b-209;Fam13b-203;Fam13b-213;Fam13b-205	Fam13b;Fam13b;Fam13b;Fam13b;Fam13b;Fam13b;Fam13b	0;0;-3798;0;0;0;0	TRUE
8886	cg23340456	0.0000223	0.00000392	5.693232419	2.89E-08	gain	yes	-0.0000357	0.00000666	-5.361206456	0.000000162	neg	yes	-0.006069181	0.001951757	-3.109598903	0.002047392	neg	ns	2.688799079	-0.00000411	0.0000671	-0.061294038	0.951164536	neg	ns	0.896843067	Gbf1	Gbf1_Exon	19	46254573	46254622	46254573	46254574	50	-	CGCAGAGCACACTCTCGTAGACATGGTGCAGCTGCTCTTCACAAGGTAAA	Exon (Gbf1-201/Gbf1, exon 7 of 40)	19	46152509	46286510	134002	1	Gbf1-201	102064	Gbf1-201;Gbf1-204;Gbf1-214;Gbf1-213;Gbf1-210	Gbf1;Gbf1;Gbf1;Gbf1;Gbf1	0;0;0;0;0	TRUE
11156	cg07117595	-0.0000632	0.0000134	-4.72613076	0.00000348	loss	ns	0.000121751	0.0000227	5.357319524	0.000000165	pos	yes	0.030946849	0.006657977	4.648086068	0.00000496	pos	ns	5.304283857	-0.000528175	0.000228967	-2.30677239	0.021726515	neg	ns	0.425014641	Fhl1	Fhl1_Exon	X	56791262	56791311	56791310	56791311	50	+	AGCCACCCAGTCTCTAAAGCTAGGAAGCCCCCAGTGTGCCACGGGAAACG	Exon (Fhl1-203/Fhl1, exon 7 of 8)	20	56731787	56793346	61560	1	Fhl1-201	59475	Fhl1-201;Fhl1-203;Fhl1-206;Fhl1-205;Fhl1-204;Fhl1-202;Fhl1-210;Fhl1-207;Fhl1-208;Fhl1-209	Fhl1;Fhl1;Fhl1;Fhl1;Fhl1;Fhl1;Fhl1;Fhl1;Fhl1;Fhl1	0;0;0;0;0;0;11443;0;3537;3264	TRUE
8723	cg16743922	0.0000985	0.00000608	16.20669357	3.24E-43	gain	yes	-0.0000552	0.0000103	-5.339690549	0.00000018	neg	yes	-0.008206272	0.003026302	-2.711650248	0.007068388	neg	ns	2.150679593	0.000204729	0.000104074	1.967138726	0.05005872	pos	ns	0.742959783	Fbxw4	Fbxw4_Intron	19	45616881	45616930	45616929	45616930	50	+	CCTAGTAGAGACACCAGACCTTTTCAAACAAGGGACAACAAGGAAAATCG	Intron (Fbxw4-206/Fbxw4, intron 1 of 4)	19	45578254	45631138	52885	2	Fbxw4-206	14208	Fbxw4-206;Fbxw4-201;Fbxw4-208	Fbxw4;Fbxw4;Fbxw4	0;0;0	TRUE
8388	cg23812660	0.000038	0.00000865	4.395738004	0.0000152	gain	ns	-0.0000784	0.0000147	-5.337105374	0.000000183	neg	yes	-0.004146828	0.004304404	-0.963392077	0.336101689	neg	ns	0.473529305	0.0000984	0.000148028	0.664982637	0.506555995	pos	ns	0.773370707	Zeb2	Zeb2_Intron	2	45083179	45083228	45083227	45083228	50	-	AAAATTTACAGGATTCTTAATCACGCTGCTCATTTGGGTGCGCAGCAGCG	Intron (Zeb2-212/Zeb2, intron 3 of 10)	2	44983632	45117395	133764	2	Zeb2-212	34167	Zeb2-212;Zeb2-213;Zeb2-201;Zeb2-202;Zeb2-215;Zeb2-214;Zeb2-203;Zeb2-221;Zeb2-220;Zeb2-216;Zeb2-222;Zeb2-208;Zeb2-228;Zeb2-226;Zeb2-209;Zeb2-224;Zeb2-207;Zeb2-219	Zeb2;Zeb2;Zeb2;Zeb2;Zeb2;Zeb2;Zeb2;Zeb2;Zeb2;Zeb2;Zeb2;Zeb2;Zeb2;Zeb2;Zeb2;Zeb2;Zeb2;Zeb2	0;0;0;0;0;0;0;0;0;0;0;0;0;0;0;0;0;0	TRUE
15354	cg00251628	0.0000147	0.00000454	3.238159839	0.001333428	gain	ns	-0.0000411	0.00000771	-5.332021788	0.000000188	neg	yes	0.002368044	0.00225895	1.048293769	0.295319879	pos	ns	0.529707319	-0.000172829	0.0000777	-2.224743116	0.026818116	neg	ns	0.860861709	Psmd11	Psmd11_threeUTR	11	80471954	80472003	80472002	80472003	50	-	AAGGCTTACACTACCTAAAGCTGTGCTCTCTGCCTCCTGGGAGAGGGCCG	3' UTR	11	80428625	80473248	44624	1	Psmd11-201	43329	Psmd11-214;Psmd11-201;Psmd11-204;Psmd11-215;Psmd11-209;Psmd11-205;Psmd11-203;Psmd11-213;Psmd11-202	Psmd11;Psmd11;Psmd11;Psmd11;Psmd11;Psmd11;Psmd11;Psmd11;Psmd11	0;0;0;0;0;0;0;0;0	TRUE
25779	cg09851167	0.0000961	0.0000067	14.3436424	3.87E-36	gain	yes	-0.0000606	0.0000114	-5.323059515	0.000000196	neg	yes	0.004270516	0.003332878	1.28132984	0.20103546	pos	ns	0.696727332	-0.000369191	0.000114617	-3.221069392	0.001412777	neg	ns	0.190219571	Uncx	Uncx_Promoter	5	139540711	139540760	139540711	139540712	50	+	CGTCTTATTATCAAGTTAATTAAAGCTAGCATCTGACAATGTCACTCGGC	Promoter (2-3kb)	5	139543494	139548179	4686	1	Uncx-201	-2734	Uncx-201;Uncx-202	Uncx;Uncx	0;0	TRUE
15890	cg24327048	0.00000599	0.000021	0.285420323	0.775512746	gain	ns	0.000189801	0.0000357	5.322933965	0.000000196	pos	yes	0.022453069	0.010446358	2.149368161	0.032378996	pos	ns	1.489736616	-0.000419019	0.000359249	-1.166374914	0.244359412	neg	ns	0.688257317	Gm6411	Gm6411_Intron	13	83750000	83750049	83750048	83750049	50	+	TTTGGAAGCCATGCATAGAAAATAGCTCATTTACATGCATCTGCTTAGCG	Intron (C130071C03Rik-204/C130071C03Rik-204, intron 3 of 3)	13	83761132	83762335	1204	2	Gm6411-201	12286	NA	NA	NA	TRUE
21468	cg01809820	0.0000105	0.00000855	1.2321659	0.21882086	gain	ns	0.0000773	0.0000145	5.320630206	0.000000199	pos	yes	0.008862388	0.00425753	2.081579515	0.038201131	pos	ns	1.417923775	-0.0000576	0.000146416	-0.393319226	0.694354079	neg	ns	0.971986439	Bcl11b	Bcl11b_Exon	12	107915489	107915538	107915537	107915538	50	+	AGACGCTGAAGGGCATCTGGCAGATGTCGCAGCGGTACACCTCCTTGCCG	Exon (Bcl11b-201/Bcl11b, exon 4 of 4)	12	107910403	108003602	93200	2	Bcl11b-201	88064	Bcl11b-201;Bcl11b-202;Bcl11b-203	Bcl11b;Bcl11b;Bcl11b	0;0;0	TRUE
26817	cg27634685	0.00000102	0.00000422	0.241967719	0.808965165	gain	ns	-0.0000381	0.00000717	-5.316699472	0.000000203	neg	yes	0.001971654	0.002099465	0.939122031	0.348399234	pos	ns	0.457922809	-0.0000749	0.0000722	-1.037504114	0.30030956	neg	ns	0.885763762	H13	H13_Exon	2	152681050	152681099	152681098	152681099	50	+	GATATTCTCCCAGGAGTACATCAACCTCCTGCTGTCCATGTATTTCTTCG	Exon (H13-204/H13, exon 3 of 12)	2	152669461	152708670	39210	1	H13-204	11589	H13-204;H13-206;H13-203;H13-202;H13-201	H13;H13;H13;H13;H13	0;0;0;0;0	TRUE
20449	cg10418984	0.0000482	0.0000114	4.218354378	0.0000323	gain	ns	-0.000103236	0.0000194	-5.3128511	0.000000207	neg	yes	0.019196927	0.005692709	3.372195648	0.000840249	pos	ns	3.075592067	-0.000664567	0.000195772	-3.394600376	0.00077669	neg	ns	0.835735737	Csde1	Csde1_Exon	3	103040473	103040522	103040521	103040522	50	-	TAAATCTCCAGCTGCCCCGGGTCAGAGTCCAACAGGGAGTGTATGCTACG	Exon (Csde1-201/Csde1, exon 5 of 20)	3	103020426	103058186	37761	1	Csde1-201	20047	Csde1-201;Csde1-211;Csde1-207;Csde1-214;Csde1-215;Csde1-216;Csde1-206;Csde1-212;Csde1-213;Csde1-205;Csde1-217;Csde1-202;Csde1-210;Csde1-209	Csde1;Csde1;Csde1;Csde1;Csde1;Csde1;Csde1;Csde1;Csde1;Csde1;Csde1;Csde1;Csde1;Csde1	0;0;0;0;0;0;0;0;0;0;0;0;0;-3020	TRUE
2179	cg15656937	0.0000123	0.00000863	1.42112695	0.156284986	gain	ns	-0.0000779	0.0000147	-5.311309926	0.000000208	neg	yes	0.016936259	0.004295987	3.942344125	0.0000998	pos	ns	4.000914675	-0.000696596	0.000147739	-4.715054257	0.00000366	neg	ns	0.853543561	Kdm6a	Kdm6a_threeUTR	X	18278760	18278809	18278808	18278809	50	+	AAACTGTGTCTATGCAACCTTCCAAGTGCGGAGTGTCAACCAACTGGACG	3' UTR	20	18162575	18279936	117362	1	Kdm6a-201	116185	Kdm6a-201;Kdm6a-202;Kdm6a-208;Kdm6a-204	Kdm6a;Kdm6a;Kdm6a;Kdm6a	0;0;0;4248	TRUE
12888	cg12653841	0.00020476	0.0000135	15.20055717	2.22E-39	gain	yes	-0.000121241	0.0000229	-5.297889768	0.000000223	neg	yes	0.006372361	0.006704437	0.950469116	0.342614358	pos	ns	0.465194441	-0.0000688	0.000230565	-0.298236898	0.765722156	neg	ns	0.598592808	Psd3	Psd3_fiveUTR	8	67974149	67974198	67974197	67974198	50	+	CCAGCAGTTACCCATTGATCATAGAAAATGCCCAGTTCATCAGTTTAACG	Promoter (<=1kb)	8	67689082	67974574	285493	2	Psd3-201	376	Psd3-201;Psd3-205;Psd3-204;Psd3-213;Psd3-214;Psd3-210	Psd3;Psd3;Psd3;Psd3;Psd3;Psd3	0;0;0;0;0;0	TRUE
22979	cg21405047	0.000103905	0.0000143	7.264671451	3.05E-12	gain	yes	-0.000128684	0.0000243	-5.295937086	0.000000225	neg	yes	0.022158393	0.007118667	3.112716581	0.002026544	pos	ns	2.693243981	-0.000320649	0.00024481	-1.309783277	0.191238964	neg	ns	0.592800047	Cnot2	Cnot2_fiveUTR	10	116549038	116549087	116549086	116549087	50	+	AGTTTCTTTTCTCAGATAATGTATGTCCATCAGTCCTCACCATAGAGTCG	5' UTR	10	116485161	116581511	96351	2	Cnot2-210	32424	Cnot2-210;Cnot2-204;Cnot2-212;Cnot2-203;Cnot2-202;Cnot2-213;Cnot2-209;Cnot2-214;Cnot2-215;Cnot2-205;Cnot2-207;Cnot2-211;Cnot2-217;Cnot2-216;Cnot2-206;Cnot2-201;Cnot2-208;Cnot2-218	Cnot2;Cnot2;Cnot2;Cnot2;Cnot2;Cnot2;Cnot2;Cnot2;Cnot2;Cnot2;Cnot2;Cnot2;Cnot2;Cnot2;Cnot2;Cnot2;Cnot2;Cnot2	0;0;0;0;0;0;0;0;0;0;0;0;0;0;0;0;0;0	TRUE
4042	cg22916962	-0.0000184	0.00000843	-2.185622957	0.029591189	loss	ns	0.0000759	0.0000143	5.293800594	0.000000227	pos	yes	0.002729135	0.004197789	0.650136174	0.516085762	pos	ns	0.287278123	0.000208413	0.000144362	1.443686275	0.149837048	pos	ns	0.692627108	Gm45647	Gm45647_Intergenic_upstream	8	26626676	26626725	26626724	26626725	50	+	TGTGACTTTACGAGGTCATAAAGAAAACGATGCCACTCTGCACTGAAACG	Distal Intergenic	8	26780315	26780509	195	1	Gm45647-201	-153590	NA	NA	NA	FALSE
4942	cg21808200	0.000163799	0.0000159	10.32731275	1.11E-21	gain	yes	-0.000142321	0.0000269	-5.28186482	0.000000241	neg	yes	0.055622196	0.007894052	7.046089737	1.20E-11	pos	yes	10.9222549	-0.001277382	0.000271476	-4.705326857	0.00000382	neg	ns	0.803057393	Marchf6	Marchf6_Exon	15	31502734	31502783	31502782	31502783	50	-	ACAACTCCCAACCATGCAAAGGCCACAAGTGTATAATGAAACCAATATCG	Exon (Marchf6-201/Marchf6, exon 4 of 26)	15	31455891	31531053	75163	2	Marchf6-201	28270	Marchf6-201;Marchf6-202;Marchf6-204	Marchf6;Marchf6;Marchf6	0;0;0	TRUE
1033	cg24266105	-0.00000112	0.0000108	-0.103312427	0.917781814	loss	ns	0.0000972	0.0000184	5.278096141	0.000000246	pos	yes	0.009238649	0.005392846	1.713130524	0.087688327	pos	ns	1.057058217	-0.000111595	0.00018546	-0.601719442	0.5478007	neg	ns	0.205662578	Grm1	Grm1_Exon	10	11080147	11080196	11080147	11080148	50	-	CGAATGGAAATCAGAGAGTCCCTAATGAACTCAATGCTCTGTTCCAGAGC	Exon (Grm1-201/Grm1, exon 2 of 9)	10	10686059	11082356	396298	2	Grm1-201	2160	Grm1-201;Grm1-203;Grm1-202;Grm1-206	Grm1;Grm1;Grm1;Grm1	0;0;0;2054	TRUE
18380	cg12083852	0.0000929	0.0000136	6.840166911	4.22E-11	gain	yes	-0.000121686	0.0000231	-5.273416094	0.000000252	neg	yes	0.029351054	0.006760324	4.341663665	0.0000192	pos	ns	4.717330185	-0.0000156	0.000232487	-0.06688834	0.946713714	neg	ns	0.52098589	Pi4kb	Pi4kb_Exon	3	94989299	94989348	94989347	94989348	50	+	CCAGGAGCTCTCCTCCAGCACCGAGAGTATTGATAATTCATTCAGTTCCG	Exon (Pi4kb-202/Pi4kb, exon 3 of 12)	3	94974731	95006843	32113	1	Pi4kb-201	14568	Pi4kb-201;Pi4kb-207;Pi4kb-202;Pi4kb-203;Pi4kb-206	Pi4kb;Pi4kb;Pi4kb;Pi4kb;Pi4kb	0;0;0;0;0	TRUE
17542	cg03517030	0.0000499	0.0000677	0.73702167	0.461666601	gain	ns	0.000606106	0.00011497	5.27185273	0.000000254	pos	yes	0.091865651	0.033682375	2.727410124	0.00674708	pos	ns	2.17088411	0.000724379	0.001158334	0.625362644	0.532193155	pos	ns	0.396539854	Mtch2	Mtch2_Exon	2	90847309	90847358	90847309	90847310	50	+	CGGCCAGTCAGGTGCTCCTGGGCTCCGGTCTCACCATCCTGTCCCAGCCG	Promoter (<=1kb)	2	90847155	90866810	19656	1	Mtch2-205	154	Mtch2-205;Mtch2-203;Mtch2-210;Mtch2-211;Mtch2-209;Mtch2-202;Mtch2-201;Mtch2-208	Mtch2;Mtch2;Mtch2;Mtch2;Mtch2;Mtch2;Mtch2;Mtch2	0;0;0;0;0;0;0;-4833	TRUE
21215	cg08666298	-0.0000728	0.0000107	-6.805580714	5.21E-11	loss	yes	-0.0000958	0.0000182	-5.270138134	0.000000256	neg	yes	0.001902124	0.005323839	0.357284361	0.721122042	pos	ns	0.14199123	-0.000478883	0.000183086	-2.615614558	0.009342491	neg	ns	0.635890647	Ddx5	Ddx5_threeUTR	11	106783279	106783328	106783327	106783328	50	-	CCAGGATTCACTTGAGAATGTGTCTCTCTCTGGCAGGTCTCGACATGACG	3' UTR	11	106780355	106788532	8178	2	Ddx5-201	5204	Ddx5-201;Ddx5-208;Ddx5-205;Ddx5-207;Ddx5-203;Ddx5-202;Ddx5-209;Ddx5-206;Ddx5-204;Polg2-201;Polg2-203;Polg2-206;Polg2-204;Polg2-202	Ddx5;Ddx5;Ddx5;Ddx5;Ddx5;Ddx5;Ddx5;Ddx5;Ddx5;Polg2;Polg2;Polg2;Polg2;Polg2	0;0;0;0;0;0;2722;0;0;-3764;-3742;-3806;-3806;-3777	TRUE
16647	cg11831565	-0.000014	0.00000519	-2.690985137	0.007510605	loss	ns	-0.0000464	0.00000881	-5.267898484	0.000000259	neg	yes	0.002197418	0.002582203	0.850985897	0.395434027	pos	ns	0.402925963	-0.000354498	0.0000888	-3.992019744	0.0000818	neg	ns	0.805683892	Erg28	Erg28_Exon	12	85819503	85819552	85819551	85819552	50	+	CAGAGGCAGCGAATCACTGATGAGAGCAGCGTCCAGATCCCAAAGGTCCG	Exon (Erg28-201/Erg28, exon 3 of 5)	12	85815448	85824522	9075	2	Erg28-201	4970	Erg28-201;Erg28-203;Erg28-202;Erg28-205;Erg28-204	Erg28;Erg28;Erg28;Erg28;Erg28	0;0;0;0;0	TRUE
11353	cg03058520	0.0000182	0.0000098	1.852968452	0.06483705	gain	ns	-0.0000877	0.0000166	-5.267538912	0.000000259	neg	yes	0.030975096	0.004877841	6.350164653	7.64E-10	pos	ns	9.116638877	-0.001139984	0.000167749	-6.795792253	5.53E-11	neg	yes	0.865764576	Clk3	Clk3_Exon	9	57758692	57758741	57758692	57758693	50	-	CGGCTGCTGCGCTTACTGCTCTGTTGGCTTCTCTGCATGCACCGCCCCCC	Exon (Clk3-207/Clk3, exon 3 of 12)	9	57750624	57765103	14480	2	Clk3-207	6362	Clk3-207;Clk3-201;Clk3-205;Clk3-203;Clk3-206;Clk3-209;Clk3-208;Clk3-204	Clk3;Clk3;Clk3;Clk3;Clk3;Clk3;Clk3;Clk3	0;0;0;0;-3371;0;5567;6112	TRUE
17059	cg02429698	-0.0000155	0.0000131	-1.185781574	0.236616662	loss	ns	0.000117318	0.0000223	5.267096447	0.00000026	pos	yes	0.0135672	0.006525429	2.079127879	0.038427465	pos	ns	1.41535826	0.000224808	0.000224409	1.001778707	0.317231789	pos	ns	0.777752551	Il1rapl1	Il1rapl1_Promoter	X	88120152	88120201	88120200	88120201	50	-	AATGCCCCAAATGAAACACTGTGTACATAAGCGATGCAAATGCATCCCCG	Promoter (4-5kb)	20	86740870	88115645	1374776	2	Il1rapl1-203	-4556	Il1rapl1-203;Il1rapl1-202	Il1rapl1;Il1rapl1	0;0	FALSE
15438	cg20150985	0.0000163	0.00000379	4.286755636	0.0000242	gain	ns	-0.0000339	0.00000644	-5.263970079	0.000000264	neg	yes	-0.001010547	0.001887742	-0.535320516	0.592812049	neg	ns	0.227082978	0.0000169	0.0000649	0.260325548	0.794785494	pos	ns	0.892797364	Tnrc6b	Tnrc6b_Exon	15	80890219	80890268	80890219	80890220	50	+	CGTCAGCCTTGGAGCAATCGGCACAGGGCTCAACCCCCAAAACTTCGCTG	Exon (Tnrc6b-205/Tnrc6b, exon 2 of 3)	15	80711313	80941085	229773	1	Tnrc6b-201	178906	Tnrc6b-201;Tnrc6b-207;Tnrc6b-208;Tnrc6b-205	Tnrc6b;Tnrc6b;Tnrc6b;Tnrc6b	0;0;0;0	TRUE
21683	cg12378720	0.0000266	0.0000104	2.557556058	0.011016676	gain	ns	0.0000928	0.0000177	5.24801745	0.000000286	pos	yes	0.02294193	0.005181259	4.42786772	0.0000132	pos	ns	4.879224399	-0.000475174	0.000178183	-2.666771481	0.008060367	neg	ns	0.237808611	Brwd3	Brwd3_Intron	X	108832808	108832857	108832856	108832857	50	+	CAGAAACCAGTTTTCTTCCACTAATCCGGAACTCCGGGCTGTTACCAACG	Intron (Brwd3-205/Brwd3, intron 4 of 40)	20	108737016	108834348	97333	2	Brwd3-205	1491	Brwd3-205;Brwd3-201;Brwd3-204;Brwd3-203;Brwd3-202	Brwd3;Brwd3;Brwd3;Brwd3;Brwd3	0;0;0;0;0	TRUE
25156	cg05933505	-0.0000182	0.0000115	-1.579944733	0.115139294	loss	ns	-0.000102421	0.0000195	-5.246825697	0.000000287	neg	yes	0.042231131	0.005718883	7.384507092	1.42E-12	pos	yes	11.84689865	-0.001016276	0.000196672	-5.167365276	0.000000426	neg	yes	0.418629545	Wasf2	Wasf2_Exon	4	133176484	133176533	133176532	133176533	50	-	TGCCGTTAGTAACGAGGAACATCGAGCCAAGGCACCTGTGCCGTCAGACG	Exon (Wasf2-201/Wasf2, exon 2 of 9)	4	133130505	133199756	69252	1	Wasf2-201	45979	Wasf2-201;Wasf2-206;Wasf2-204;Wasf2-203;Wasf2-202	Wasf2;Wasf2;Wasf2;Wasf2;Wasf2	0;0;0;0;0	TRUE
9139	cg07105870	0.000101247	0.0000113	8.944923531	3.46E-17	gain	yes	-0.000100506	0.0000192	-5.226705749	0.000000318	neg	yes	0.001494102	0.005633524	0.265216308	0.791019104	pos	ns	0.101813028	-0.000318726	0.000193736	-1.645153453	0.100951716	neg	ns	0.70980646	Samd4	Samd4_Exon	14	47083524	47083573	47083572	47083573	50	+	TTGTTGTCATGGAAACAGCAGGTGCAGAAGCTCTTTCGGTCTTTCCCTCG	Exon (Samd4-201/Samd4, exon 9 of 13)	14	46882854	47103150	220297	1	Samd4-201	200670	Samd4-201;Samd4-211;Samd4-202;Samd4-206;Samd4-203;Samd4-204;Samd4-210;Samd4-205	Samd4;Samd4;Samd4;Samd4;Samd4;Samd4;Samd4;Samd4	0;0;0;0;0;0;0;-3562	TRUE
24494	cg06385312	0.0000158	0.0000219	0.722284524	0.470664065	gain	ns	0.000194623	0.0000373	5.22106601	0.000000327	pos	yes	0.011807939	0.01092077	1.081236878	0.280432157	pos	ns	0.552172188	0.000200198	0.000375564	0.533057802	0.594375497	pos	ns	0.621845733	Kcna1	Kcna1_Exon	6	126642194	126642243	126642194	126642195	50	+	CGATCTTGCCTCCAATTGTCACAGGGTACATGTCACCGTATCCTACAGTG	Exon (Kcna1-201/Kcna1, exon 2 of 2)	6	126640397	126644796	4400	2	Kcna1-201	2553	Kcna1-201;Kcna1-202;Kcna1-203	Kcna1;Kcna1;Kcna1	0;0;0	TRUE
19702	cg09824710	0.0000422	0.0000151	2.798884565	0.005449247	gain	ns	0.000133698	0.0000256	5.216806605	0.000000334	pos	yes	0.032922666	0.007508214	4.38488666	0.0000159	pos	ns	4.798186404	-0.000771795	0.000258207	-2.989058436	0.003022261	neg	ns	0.39253766	Dlg3	Dlg3_fiveUTR	X	100768058	100768107	100768058	100768059	50	+	CGGGGGGCAGTGCCATGCACAAGCACCAGCACTGCTGTAAGTGCCCTGAG	Promoter (<=1kb)	20	100767722	100818406	50685	1	Dlg3-201	336	Dlg3-201;Dlg3-204;Dlg3-202;Dlg3-206	Dlg3;Dlg3;Dlg3;Dlg3	0;0;0;0	TRUE
6456	cg21089733	-0.0000313	0.0000131	-2.384224596	0.017716455	loss	ns	0.00011614	0.0000223	5.214828988	0.000000337	pos	yes	0.013937106	0.006524658	2.136066845	0.033457047	pos	ns	1.47551239	-0.000235738	0.000224382	-1.050607929	0.294257003	neg	ns	0.554901345	Zfp536	Zfp536_Intron	7	37342999	37343048	37343047	37343048	50	-	ACAGGATGGAACTAAAAGCCATCTATCTCTCTTATACCACATGATCATCG	Intron (Zfp536-211/Zfp536, intron 3 of 3)	7	37318024	37568390	250367	2	Zfp536-211	225342	Zfp536-211	Zfp536	0	TRUE
6746	cg21736204	-0.00000902	0.00000914	-0.985998161	0.324902947	loss	ns	-0.0000806	0.0000155	-5.190215372	0.000000381	neg	yes	0.010544017	0.004551	2.316857099	0.021163009	pos	ns	1.674422592	-0.000542749	0.000156509	-3.467856565	0.000598811	neg	ns	0.635488288	Dennd1a	Dennd1a_Intergenic_upstream	2	38301862	38301911	38301910	38301911	50	-	TTCACCTCACCTGGTTTGTTTACCCAAACAAGCTGCTCATTAACAACACG	Distal Intergenic	2	37816916	38287390	470475	2	Dennd1a-207	-14521	NA	NA	NA	FALSE
5672	cg21333598	0.00000484	0.00000732	0.661091391	0.509044718	gain	ns	-0.0000645	0.0000124	-5.188614493	0.000000384	neg	yes	0.02089188	0.003643423	5.734135447	2.33E-08	pos	ns	7.633279829	-0.000631407	0.000125297	-5.039279391	0.000000796	neg	yes	0.830209302	Mapkap1	Mapkap1_Intron	2	34535049	34535098	34535049	34535050	50	-	CGATAAGAGCTGTAAAAAATGGCAGAGGAGAGCAATTGAATGGAGCAATG	Intron (Mapkap1-204/Mapkap1, intron 6 of 10)	2	34406862	34623475	216614	1	Mapkap1-204	128187	Mapkap1-204;Mapkap1-202;Mapkap1-201;Mapkap1-209;Mapkap1-203;Mapkap1-207	Mapkap1;Mapkap1;Mapkap1;Mapkap1;Mapkap1;Mapkap1	0;0;0;0;0;0	TRUE
5898	cg27278067	0.000148186	0.0000155	9.576976703	3.35E-19	gain	yes	-0.000136131	0.0000263	-5.17865987	0.000000403	neg	yes	0.049754403	0.007701168	6.460631064	4.03E-10	pos	ns	9.394306754	-0.002040117	0.000264843	-7.70313373	1.80E-13	neg	yes	0.531241596	Rab14	Rab14_threeUTR	2	35182268	35182317	35182316	35182317	50	-	CACTAGCAGCCACAGCCTTCTCTCTGGGGTTGGGGTTCACTGGTTAGCCG	3' UTR	2	35180205	35201120	20916	2	Rab14-201	18803	Cntrl-212;Cntrl-202;Cntrl-203;Cntrl-206;Cntrl-210;Rab14-201;Rab14-202;Rab14-204;Rab14-213;Rab14-212;Rab14-205;Rab14-211;Rab14-208	Cntrl;Cntrl;Cntrl;Cntrl;Cntrl;Rab14;Rab14;Rab14;Rab14;Rab14;Rab14;Rab14;Rab14	72776;72776;72649;50034;7020;0;0;0;0;7643;1831;18655;10346	TRUE
11462	cg12583945	-0.0000551	0.0000107	-5.144929637	0.000000476	loss	yes	-0.0000942	0.0000182	-5.178556697	0.000000403	neg	yes	0.027410929	0.005326433	5.146207957	0.000000473	pos	ns	6.325408686	-0.001402696	0.000183176	-7.65765609	2.43E-13	neg	yes	0.703843269	Hnrnpk	Hnrnpk_fiveUTR	13	58397873	58397922	58397873	58397874	50	-	CGTTTGGCAACGAGCACATTTTTGGGCATAGCCAACCAGGGTTTTCACAT	5' UTR	13	58391142	58403343	12202	2	Hnrnpk-202	5421	Hnrnpk-202;Hnrnpk-224;Hnrnpk-221;Hnrnpk-232;Hnrnpk-216;Hnrnpk-201;Hnrnpk-205;Hnrnpk-217;Hnrnpk-206;Hnrnpk-209;Hnrnpk-213;Hnrnpk-227;Hnrnpk-234;Hnrnpk-233;Hnrnpk-228;Hnrnpk-214;Hnrnpk-215;Hnrnpk-211;Hnrnpk-208;Hnrnpk-212;Hnrnpk-231;Hnrnpk-230;Hnrnpk-203;Hnrnpk-218;Hnrnpk-226;Hnrnpk-207;Hnrnpk-219;Hnrnpk-225;Hnrnpk-229;Hnrnpk-223;Hnrnpk-220;Hnrnpk-210;Hnrnpk-204;Hnrnpk-222;Rmi1-205;Rmi1-201;Rmi1-204	Hnrnpk;Hnrnpk;Hnrnpk;Hnrnpk;Hnrnpk;Hnrnpk;Hnrnpk;Hnrnpk;Hnrnpk;Hnrnpk;Hnrnpk;Hnrnpk;Hnrnpk;Hnrnpk;Hnrnpk;Hnrnpk;Hnrnpk;Hnrnpk;Hnrnpk;Hnrnpk;Hnrnpk;Hnrnpk;Hnrnpk;Hnrnpk;Hnrnpk;Hnrnpk;Hnrnpk;Hnrnpk;Hnrnpk;Hnrnpk;Hnrnpk;Hnrnpk;Hnrnpk;Hnrnpk;Rmi1;Rmi1;Rmi1	0;0;0;0;0;0;0;-4005;-3088;-3898;-2675;-3789;-3984;-3703;-3177;0;-2153;0;0;0;0;0;0;0;0;0;0;0;0;0;0;0;4580;4133;-4326;-4341;-4778	TRUE
24491	cg14726883	0.0000186	0.0000122	1.521052543	0.129265965	gain	ns	0.000107306	0.0000208	5.17013424	0.00000042	pos	yes	0.008323205	0.006080513	1.36883268	0.172042623	pos	ns	0.764363945	-0.00012207	0.000209108	-0.583766656	0.559801817	neg	ns	0.536671533	Kcna1	Kcna1_Exon	6	126642106	126642155	126642106	126642107	50	-	CGGTGGTAGAAATAGTTGAAATTGGACACAATGACAGGTACGGGCAGGGC	Exon (Kcna1-201/Kcna1, exon 2 of 2)	6	126640397	126644796	4400	2	Kcna1-201	2641	Kcna1-201;Kcna1-202;Kcna1-203	Kcna1;Kcna1;Kcna1	0;0;0	TRUE
21333	cg05358536	0.0000624	0.0000123	5.089996594	0.000000622	gain	yes	-0.000107658	0.0000208	-5.169091202	0.000000422	neg	yes	0.042286654	0.006101692	6.930315514	2.44E-11	pos	yes	10.61275934	-0.001233041	0.000209837	-5.876195676	1.08E-08	neg	yes	0.70343752	Nfat5	Nfat5_threeUTR	8	107372877	107372926	107372877	107372878	50	+	CGTTTTCAGTAGTACAGGCTTCTTGCCGATATGAAGGGAACTTTTCAGAA	3' UTR	8	107293470	107379516	86047	1	Nfat5-214	79407	Nfat5-213;Nfat5-214;Nfat5-206;Nfat5-211;Nfat5-203;Nfat5-201;Nfat5-202;Nfat5-207;Nfat5-208	Nfat5;Nfat5;Nfat5;Nfat5;Nfat5;Nfat5;Nfat5;Nfat5;Nfat5	0;0;0;0;0;0;0;0;0	TRUE
17997	cg06453041	-0.00000177	0.00001	-0.175968613	0.860433494	loss	ns	0.0000881	0.000017	5.169117048	0.000000422	pos	yes	0.020713764	0.004992855	4.148681521	0.0000432	pos	ns	4.364176737	-0.000567682	0.000171704	-3.306167153	0.001056873	neg	ns	0.18262981	Arx	Arx_Intron	X	93292581	93292630	93292581	93292582	50	-	CGAGTTAGGAGCTGAGTGAATCACTTTACAGTCAAAATCAAGCGCTGATA	Intron (Arx-201/Arx, intron 3 of 4)	20	93286496	93298357	11862	1	Arx-201	6085	Arx-203;Arx-201;Arx-202	Arx;Arx;Arx	6136;0;0	TRUE
9288	cg05894849	0.0000547	0.000012	4.55684481	0.00000748	gain	ns	-0.000105257	0.0000204	-5.162358157	0.000000437	neg	yes	0.028359174	0.005973373	4.747598107	0.00000315	pos	ns	5.501719623	-0.001424827	0.000205424	-6.93603773	2.36E-11	neg	yes	0.73203733	Foxp4	Foxp4_Intron	17	47914934	47914983	47914982	47914983	50	+	CTTTTGAAATTAAATTACTCCCTAATTAGCATATCAAAGCCATTGATTCG	Intron (Foxp4-204/Foxp4, intron 1 of 16)	17	47867133	47924645	57513	2	Foxp4-204	9662	Foxp4-204;Foxp4-203;Foxp4-201;Foxp4-202;Foxp4-207	Foxp4;Foxp4;Foxp4;Foxp4;Foxp4	0;0;0;0;0	TRUE
25625	cg02963783	-0.0000135	0.00000697	-1.930340042	0.05447667	loss	ns	-0.0000611	0.0000118	-5.159488828	0.000000443	neg	yes	0.002082477	0.003468546	0.600389088	0.548685615	pos	ns	0.260676425	-0.000683569	0.000119283	-5.730645193	2.37E-08	neg	yes	0.735313298	Epo	Epo_Exon	5	137525253	137525302	137525253	137525254	50	+	CGCTGGAAGCCAAAGAATTTGCCAAACAATTCCTGGAGCGGAGGGCCAAG	Exon (Gigyf1-201/Gigyf1, exon 22 of 24)	5	137483020	137533242	50223	2	Epo-202	7940	Epo-202;Gigyf1-202;Gigyf1-201;Gnb2-201;Gnb2-213;Gnb2-209;Gnb2-203;Gnb2-204;Gnb2-202;Gnb2-212;Gnb2-214;Gnb2-215;Gnb2-208;Gnb2-205;Gnb2-210;Gnb2-211;Gnb2-206;Gnb2-207	Epo;Gigyf1;Gigyf1;Gnb2;Gnb2;Gnb2;Gnb2;Gnb2;Gnb2;Gnb2;Gnb2;Gnb2;Gnb2;Gnb2;Gnb2;Gnb2;Gnb2;Gnb2	0;6705;0;0;0;0;0;0;0;0;0;0;0;0;0;0;0;0	TRUE
22404	cg08587914	-0.0000123	0.0000108	-1.134981707	0.257259779	loss	ns	0.0000949	0.0000184	5.156422326	0.00000045	pos	yes	0.014418909	0.005393277	2.673496971	0.007904146	pos	ns	2.102145036	-0.000572095	0.000185474	-3.084499347	0.002222574	neg	ns	0.665836694	Gm11692	Gm11692_Intergenic_upstream	11	114300732	114300781	114300732	114300733	50	+	CGGGCTTATCTGTAAACTGACTGAATTCACACTGGGATGCTAAGAAAATA	Distal Intergenic	11	114357129	114358261	1133	1	Gm11692-201	-56348	NA	NA	NA	FALSE
23898	cg04855834	0.0000353	0.00000657	5.36944725	0.000000155	gain	yes	-0.0000575	0.0000112	-5.149085357	0.000000466	neg	yes	-0.00447245	0.003272141	-1.366826655	0.172670056	neg	ns	0.762782971	-0.0000382	0.000112529	-0.339542601	0.734430928	neg	ns	0.826050631	Csnk1d	Csnk1d_threeUTR	11	120963867	120963916	120963867	120963868	50	-	CGACAGACTGAAGACCACTGGAAGCCACCCGACCAGGAATCTGTCGGAGC	3' UTR	11	120958990	120991330	32341	2	Csnk1d-209	27414	Csnk1d-209;Csnk1d-202;Csnk1d-201;Csnk1d-203;Csnk1d-205;Csnk1d-204;Slc16a3-202;Slc16a3-208	Csnk1d;Csnk1d;Csnk1d;Csnk1d;Csnk1d;Csnk1d;Slc16a3;Slc16a3	0;0;0;0;0;4145;14800;14786	TRUE
11392	cg23420041	0.0000411	0.0000149	2.761790761	0.006091466	gain	ns	0.000130335	0.0000253	5.149328963	0.000000466	pos	yes	0.022363971	0.007415302	3.015921848	0.002773959	pos	ns	2.556899892	-0.000117844	0.000255012	-0.462111082	0.644325809	neg	ns	0.382704354	Zic3	Zic3_Intergenic_upstream	X	57918813	57918862	57918813	57918814	50	+	CGTTGTCCCTTCTGTAGCTACATCTGCTCCGACCTATTAAGAAAAGTAAG	Distal Intergenic	20	58022700	58031448	8749	1	Zic3-204	-103838	NA	NA	NA	FALSE
25723	cg08193095	-0.0000138	0.0000147	-0.937632042	0.349163454	loss	ns	0.000128815	0.000025	5.149056768	0.000000466	pos	yes	0.013883455	0.007329189	1.894268842	0.059119955	pos	ns	1.228265905	-0.000000352	0.00025205	-0.001394793	0.998888014	neg	ns	0.64652486	Lhx9	Lhx9_Exon	1	138828670	138828719	138828670	138828671	50	+	CGTCGGGATGTTTGGCTGTAATGCCCCAAGATTTGTTCTCCCTGAAAAAA	Exon (Lhx9-201/Lhx9, exon 5 of 5)	1	138825186	138842457	17272	2	Lhx9-201	13738	Lhx9-201;Lhx9-203;Lhx9-205;Lhx9-202;Lhx9-204;Lhx9-206;Lhx9-207	Lhx9;Lhx9;Lhx9;Lhx9;Lhx9;Lhx9;Lhx9	0;0;0;0;0;4940;0	TRUE
19843	cg05901294	0.0000124	0.00000784	1.580972382	0.114904079	gain	ns	0.0000686	0.0000133	5.147892446	0.000000469	pos	yes	0.01112489	0.003901463	2.851466193	0.004643887	pos	ns	2.333118348	-0.000262441	0.000134171	-1.956020087	0.051360609	neg	ns	0.738105866	Nlgn3	Nlgn3_Exon	X	101303094	101303143	101303094	101303095	50	-	CGCCCGAAAGCCCAACAAGAAAATTTGTAGGAAAGGAGGTAGGTAGCGAG	Exon (Gm21986-201/Gm21986-201, exon 6 of 11)	20	101299168	101325963	26796	1	Nlgn3-202	3926	Nlgn3-202;Nlgn3-203;Nlgn3-206;Nlgn3-201;Nlgn3-205	Nlgn3;Nlgn3;Nlgn3;Nlgn3;Nlgn3	0;0;0;0;0	TRUE
4525	cg24874499	0.000211229	0.00000977	21.62799137	6.99E-64	gain	yes	-0.0000854	0.0000166	-5.145409118	0.000000475	neg	yes	0.012135872	0.004860859	2.496651798	0.013056036	pos	ns	1.884188677	-0.000282689	0.000167165	-1.691082166	0.091826157	neg	ns	0.850791778	Med27	Med27_Intron	2	29452169	29452218	29452169	29452170	50	+	CGGTTGCTATTATCCCTGAACACTGTAAAAATGAACTTTGAAACAGTTGG	Intron (Med27-201/Med27, intron 3 of 7)	2	29346819	29524793	177975	1	Med27-201	105350	Med27-201;Med27-202;Med27-208;Med27-207;Med27-209;Med27-206;Med27-205;Med27-203	Med27;Med27;Med27;Med27;Med27;Med27;Med27;Med27	0;0;0;0;0;0;0;0	TRUE
18884	cg27359924	-0.0000111	0.0000187	-0.591949759	0.554315692	loss	ns	0.000163406	0.0000318	5.143750367	0.000000478	pos	yes	0.035886713	0.00930689	3.855929383	0.000140209	pos	ns	3.853222963	-0.000287571	0.000320063	-0.898481227	0.369626366	neg	ns	0.546999089	Rps18-ps6	Rps18-ps6_Intron	13	97824607	97824656	97824655	97824656	50	+	CTGCCATTTCTCATGACAAACTTTAATGCTTTAATTAGGAGGCATCTGCG	Intron (Gm41031-201/Gm41031-201, intron 1 of 2)	13	97760072	97760632	561	2	Rps18-ps6-201	-63975	NA	NA	NA	TRUE
2643	cg12580399	0.0000758	0.00000465	16.29926354	1.44E-43	gain	yes	-0.0000406	0.0000079	-5.137140056	0.000000494	neg	yes	-0.006615674	0.002313086	-2.860107238	0.004522416	neg	ns	2.344629487	0.000165855	0.0000795	2.084998336	0.037887409	pos	ns	0.823792889	Arhgap21	Arhgap21_Exon	2	20854159	20854208	20854207	20854208	50	+	GTTCCAGCTGTCCATCAGGGACATCACAGAATCCACTAGTGACATTACCG	Exon (Arhgap21-217/Arhgap21, exon 18 of 20)	2	20847919	20967721	119803	2	Arhgap21-210	113513	Arhgap21-210;Arhgap21-201;Arhgap21-213;Arhgap21-208;Arhgap21-205;Arhgap21-217;Arhgap21-203;Arhgap21-209;Arhgap21-206;Arhgap21-218;Arhgap21-216	Arhgap21;Arhgap21;Arhgap21;Arhgap21;Arhgap21;Arhgap21;Arhgap21;Arhgap21;Arhgap21;Arhgap21;Arhgap21	0;0;0;0;-912;0;0;0;0;0;0	TRUE
5083	cg00560327	-0.0000048	0.00000855	-0.561065461	0.575158237	loss	ns	-0.0000745	0.0000145	-5.128354589	0.000000516	neg	yes	0.007499926	0.004254739	1.762722766	0.078932588	pos	ns	1.102743658	-0.000457067	0.00014632	-3.123748747	0.001954334	neg	ns	0.84955712	Brd4	Brd4_Exon	17	32224972	32225021	32225020	32225021	50	-	CATCTGTGGTCTGAACTGTAAACAAATGATCTGGCTTCATGGCACAGCCG	Exon (Brd4-204/Brd4, exon 5 of 11)	17	32196274	32284097	87824	2	Brd4-201	59076	Brd4-201;Brd4-203;Brd4-202;Brd4-212;Brd4-205;Brd4-204;Brd4-210;Brd4-211	Brd4;Brd4;Brd4;Brd4;Brd4;Brd4;Brd4;Brd4	0;0;0;0;0;0;0;0	TRUE
21677	cg05203258	0.000277346	0.0000158	17.55752114	2.16E-48	gain	yes	-0.000137568	0.0000268	-5.126234435	0.000000521	neg	yes	-0.018397584	0.007862053	-2.340048284	0.01991545	neg	ns	1.700809885	0.000744363	0.000270375	2.753072074	0.006252029	pos	ns	0.645754164	Zfhx3	Zfhx3_Intron	8	108823057	108823106	108823057	108823058	50	+	CGAATTATGTCATGTGGTATCCCCTTTGATTTCGACATGCCTCAGTTTGT	Intron (Zfhx3-204/Zfhx3, intron 9 of 15)	8	107942644	108961630	1018987	1	Zfhx3-204	880413	Zfhx3-204;Zfhx3-201	Zfhx3;Zfhx3	0;0	TRUE
26281	cg24856637	0.0000173	0.0000129	1.340270678	0.18113882	gain	ns	0.000112538	0.000022	5.121518073	0.000000533	pos	yes	0.015292287	0.006437522	2.375492772	0.018133331	pos	ns	1.741522422	-0.000256352	0.000221386	-1.157943267	0.247778527	neg	ns	0.3303445	Insm1	Insm1_threeUTR	2	146224311	146224360	146224311	146224312	50	-	CGATTAGCTTTATTATGGCTTGTGAACTGCTGGAGTCTGGCTTTACCTTT	3' UTR	2	146221921	146225020	3100	1	Insm1-201	2390	Insm1-201	Insm1	0	TRUE
18051	cg12645831	-0.00000668	0.00000259	-2.577560867	0.010411766	loss	ns	0.0000225	0.0000044	5.116148504	0.000000548	pos	yes	0.006733635	0.001289727	5.220977594	0.000000327	pos	ns	6.485673395	-0.000148778	0.0000444	-3.354356488	0.000894287	neg	ns	0.936983627	Pola1	Pola1_Intron	X	93409561	93409610	93409609	93409610	50	+	ACCGATTAGGCGATAAATGGACTCGCTTTGAATTGAAGTGAATGCACCCG	Intron (Pola1-201/Pola1, intron 35 of 36)	20	93304767	93632155	327389	2	Pola1-201	222545	Pola1-201	Pola1	0	TRUE
14816	cg01036197	0.0000143	0.0000075	1.908191604	0.05729004	gain	ns	0.0000652	0.0000127	5.115491193	0.000000549	pos	yes	0.017546067	0.003733655	4.699434473	0.00000393	pos	ns	5.40574728	-0.000450524	0.0001284	-3.50874925	0.000516884	neg	ns	0.85586462	Fam172a	Fam172a_Intron	13	77868314	77868363	77868314	77868315	50	-	CGACTTTATTATTGAGTATAACAGCTGAAGTGTTCATATAATTATTTGTT	Intron (Fam172a-203/Fam172a, intron 6 of 10)	13	77708690	78163655	454966	1	Fam172a-203	159624	Fam172a-203;Fam172a-201;Fam172a-202;Fam172a-209;Fam172a-205;Fam172a-207;Fam172a-208	Fam172a;Fam172a;Fam172a;Fam172a;Fam172a;Fam172a;Fam172a	0;0;0;0;0;0;0	TRUE
4733	cg17000486	0.0000313	0.0000074	4.233937461	0.0000303	gain	ns	-0.0000642	0.0000126	-5.110876951	0.000000562	neg	yes	0.031117326	0.003682698	8.449601158	1.15E-15	pos	yes	14.93828326	-0.000763607	0.000126648	-6.02937892	4.68E-09	neg	yes	0.829360866	Sh3glb2	Sh3glb2_Exon	2	30348567	30348616	30348615	30348616	50	-	GGCCGAGAGAATGTAATTACGAGGTCTAGTCTCCTGAAAGTCAGGCACCG	Exon (Sh3glb2-202/Sh3glb2, exon 6 of 12)	2	30344809	30359240	14432	2	Sh3glb2-202	10624	Nup188-201;Nup188-203;Sh3glb2-202;Sh3glb2-201;Sh3glb2-203;Sh3glb2-214;Sh3glb2-204;Sh3glb2-213;Sh3glb2-209;Sh3glb2-205;Sh3glb2-211;Sh3glb2-210;Sh3glb2-207;Sh3glb2-208;Sh3glb2-212;Sh3glb2-206	Nup188;Nup188;Sh3glb2;Sh3glb2;Sh3glb2;Sh3glb2;Sh3glb2;Sh3glb2;Sh3glb2;Sh3glb2;Sh3glb2;Sh3glb2;Sh3glb2;Sh3glb2;Sh3glb2;Sh3glb2	62170;5627;0;0;0;0;0;0;-2466;0;-911;-980;0;0;10629;10644	TRUE
5984	cg18897227	0.0000138	0.0000124	1.110115098	0.267809784	gain	ns	-0.000107624	0.0000211	-5.102193486	0.000000586	neg	yes	-0.011821933	0.006179716	-1.913022006	0.056666328	neg	ns	1.246674932	-0.000512929	0.00021252	-2.41355689	0.016377214	neg	ns	0.680946	Ddr1	Ddr1_Exon	17	35686492	35686541	35686540	35686541	50	+	GTGGGTTTGGCCCAGGCGGGTGTGGGGGGGCCCGGGCCTCGAGGGGGACG	Exon (Ddr1-204/Ddr1, exon 12 of 18)	17	35681567	35700610	19044	2	Ddr1-204	14069	Ddr1-204;Ddr1-203;Ddr1-212;Ddr1-202;Ddr1-201;Ddr1-211;Ddr1-210;Ddr1-209;Ddr1-205;Ddr1-208;Ddr1-207	Ddr1;Ddr1;Ddr1;Ddr1;Ddr1;Ddr1;Ddr1;Ddr1;Ddr1;Ddr1;Ddr1	0;0;0;0;0;0;0;17436;18080;11430;15505	TRUE
3371	cg27284917	0.00000821	0.0000116	0.705382171	0.481102119	gain	ns	0.000100798	0.0000198	5.100791774	0.00000059	pos	yes	0.015918057	0.005789378	2.749528199	0.006318381	pos	ns	2.199394215	-0.000385857	0.000199096	-1.938042056	0.053525876	neg	ns	0.58520158	Apba1	Apba1_Exon	19	23893933	23893982	23893933	23893934	50	+	CGACGAGCCCAAAGAGCCCATCTGGGTCATGCGCCAGGACATTAGCCCCA	Exon (Apba1-201/Apba1, exon 2 of 13)	19	23758887	23949596	190710	1	Apba1-201	135046	Apba1-201	Apba1	0	TRUE
4255	cg19302474	0.0000478	0.0000109	4.379558881	0.0000163	gain	ns	0.0000945	0.0000185	5.097558801	0.0000006	pos	yes	0.018201943	0.005433098	3.350196167	0.000907347	pos	ns	3.042226693	-0.000152981	0.000186844	-0.818762507	0.41355088	neg	ns	0.662202591	Tpm3-rs2	Tpm3-rs2_Intergenic_downstream	4	27988097	27988146	27988097	27988098	50	+	CGTTGTGTAAAGAAATTGAAATGGAATCCTACTTGACCCAGCAGGATGGG	Distal Intergenic	4	27996583	27996905	323	2	Tpm3-rs2-201	8759	NA	NA	NA	FALSE
16807	cg09074860	0.000286957	0.0000134	21.45465196	3.13E-63	gain	yes	-0.00011572	0.0000227	-5.092755851	0.000000614	neg	yes	0.001119945	0.006656899	0.168238277	0.866505538	pos	ns	0.062228658	0.000220315	0.00022893	0.962365881	0.336615907	pos	ns	0.618311355	Lrba	Lrba_Intron	3	86557111	86557160	86557111	86557112	50	+	CGTTAGGTTGTCCTGAAAGCATCAGGCAGTCACAGCCCCTTTCATGTAAG	Intron (Lrba-202/Lrba, intron 40 of 50)	3	86224680	86746712	522033	1	Lrba-202	332431	Lrba-202;Lrba-204;Lrba-201;Lrba-203;Lrba-205;Lrba-206	Lrba;Lrba;Lrba;Lrba;Lrba;Lrba	0;0;0;0;0;0	TRUE
103	cg24468708	0.000100843	0.0000106	9.549467439	4.12E-19	gain	yes	-0.0000913	0.0000179	-5.091078844	0.000000619	neg	yes	-0.02552442	0.005255847	-4.856385574	0.0000019	neg	ns	5.721334393	0.000489396	0.000180748	2.707612651	0.007152897	pos	ns	0.709589494	Bet1	Bet1_Intergenic_upstream	6	4140803	4140852	4140851	4140852	50	+	AGTCATGTCAATCAAAAAGTCATTTCCTTTTGTTTGCGTTTTAACATTCG	Distal Intergenic	6	4080318	4086972	6655	2	Bet1-203	-53831	NA	NA	NA	FALSE
18406	cg11338199	-0.0000333	0.0000136	-2.45084639	0.014804182	loss	ns	0.000117311	0.0000231	5.076331056	0.000000665	pos	yes	0.018395416	0.006770273	2.717086139	0.006956036	pos	ns	2.157638195	-0.000431933	0.000232829	-1.855151905	0.064523725	neg	ns	0.402943726	Arhgef9	Arhgef9_fiveUTR	X	95165866	95165915	95165914	95165915	50	+	CAGGGTCATGGTGCAATGCAGAACACTGTAGTGTTCCAGGTGGGGGGCCG	Promoter (<=1kb)	20	95048935	95166361	117427	2	Arhgef9-202	446	Arhgef9-202;Arhgef9-217;Arhgef9-205;Arhgef9-207;Arhgef9-210;Arhgef9-203;Arhgef9-209;Arhgef9-206;Arhgef9-208;Arhgef9-204;Arhgef9-216;Arhgef9-219;Arhgef9-201;Arhgef9-218;Arhgef9-220;Arhgef9-213;Arhgef9-214	Arhgef9;Arhgef9;Arhgef9;Arhgef9;Arhgef9;Arhgef9;Arhgef9;Arhgef9;Arhgef9;Arhgef9;Arhgef9;Arhgef9;Arhgef9;Arhgef9;Arhgef9;Arhgef9;Arhgef9	0;0;0;0;0;0;0;0;0;0;0;0;0;0;0;0;0	TRUE
23703	cg25118146	0.0000233	0.00000505	4.610003384	0.00000589	gain	ns	-0.0000436	0.00000858	-5.073903401	0.000000673	neg	yes	0.004264147	0.002514654	1.695719201	0.090943074	pos	ns	1.041230369	-0.0000354	0.0000865	-0.409790056	0.682242989	neg	ns	0.625671219	Wnk1	Wnk1_Exon	6	119952906	119952955	119952906	119952907	50	+	CGTTGGAAGAGGGAGCAATATTTGAATCTCCTGGGTACTGTGGTGGCAGT	Exon (Wnk1-202/Wnk1, exon 12 of 28)	6	119923969	120038672	114704	2	Wnk1-202	85717	Wnk1-202;Wnk1-203;Wnk1-223;Wnk1-204;Wnk1-224;Wnk1-222;Wnk1-219;Wnk1-226;Wnk1-215;Wnk1-221;Wnk1-207;Wnk1-214;Wnk1-211;Wnk1-206;Wnk1-210	Wnk1;Wnk1;Wnk1;Wnk1;Wnk1;Wnk1;Wnk1;Wnk1;Wnk1;Wnk1;Wnk1;Wnk1;Wnk1;Wnk1;Wnk1	0;0;0;0;0;-4480;-4801;-2752;-908;0;0;0;0;0;9975	TRUE
11813	cg14754937	0.00000593	0.0000202	0.293915759	0.769018964	gain	ns	0.000173781	0.0000343	5.072804497	0.000000676	pos	yes	0.034256405	0.010036235	3.413272554	0.000727177	pos	ns	3.138359844	-0.000787441	0.000345145	-2.28147718	0.023198034	neg	ns	0.52595218	Sox3	Sox3_Promoter	X	60899625	60899674	60899625	60899626	50	-	CGACGTGGGCCTTTTGATCAGAAAAGAAATTAGCTCTAAAAAACAGACAA	Promoter (6-7kb)	20	60891366	60893430	2065	2	Sox3-201	-6244	NA	NA	NA	FALSE
27245	cg08415412	0.0000158	0.0000102	1.542136372	0.124060606	gain	ns	0.0000883	0.0000174	5.070242475	0.000000685	pos	yes	0.02567302	0.005099682	5.034238904	0.000000815	pos	ns	6.088784186	-0.000645835	0.000175378	-3.682538861	0.000272357	neg	ns	0.521801179	Nhs	Nhs_Exon	X	161908711	161908760	161908759	161908760	50	-	TGGATGCTGCCTTCTGATGAGGAAGTCGACTGGGGAGGTCTCTGCGCACG	Exon (Gm15202-201/Gm15202-201, exon 2 of 2)	20	161833296	162159730	326435	2	Nhs-202	250970	Nhs-202;Nhs-201	Nhs;Nhs	0;0	TRUE
12475	cg03819788	-0.000420662	0.0000379	-11.09783024	2.55E-24	loss	yes	0.000326259	0.0000644	5.06650188	0.000000697	pos	yes	0.088702942	0.018865643	4.701824544	0.00000389	pos	ns	5.410491527	-0.004765552	0.000648788	-7.345316549	1.83E-12	neg	yes	0.605204643	Gm13577	Gm13577_Intergenic_downstream	2	64462496	64462545	64462544	64462545	50	+	CTGCTTCACTGCAAAGCCACTCTTAAAACATAATTCCTTAATGAAGTCCG	Distal Intergenic	2	64474745	64474949	205	2	Gm13577-201	12404	NA	NA	NA	FALSE
15681	cg07340783	-0.0000102	0.000017	-0.600604705	0.548542145	loss	ns	0.000146176	0.0000289	5.059841557	0.00000072	pos	yes	0.024288248	0.008463631	2.869719665	0.004390693	pos	ns	2.357466881	-0.000310561	0.000291064	-1.066987606	0.286807668	neg	ns	0.344668516	Gm14741	Gm14741_Intergenic_upstream	X	82814768	82814817	82814768	82814769	50	-	CGACGTTGTAGCAGCTGCATAATAAATGACTGAAAGAATCATGTTAGGCA	Distal Intergenic	20	82757430	82758438	1009	2	Gm14741-201	-56379	NA	NA	NA	FALSE
27238	cg07998710	0.0000316	0.0000146	2.174322892	0.030436976	gain	ns	0.000125059	0.0000247	5.059089406	0.000000723	pos	yes	0.020203321	0.00724205	2.78972422	0.005601861	pos	ns	2.251667671	-0.0000389	0.000249053	-0.156387103	0.875829697	neg	ns	0.440244522	Rai2	Rai2_Intron	X	161718760	161718809	161718808	161718809	50	-	ATTTTGCTGAGGATAAGTGACATCAACAGAATGATATTCCGCAGAGCCCG	Intron (Rai2-202/Rai2, intron 1 of 1)	20	161717069	161779494	62426	1	Rai2-202	1691	Rai2-202;Rai2-201	Rai2;Rai2	0;0	TRUE
4363	cg00896947	0.0000357	0.00000659	5.413427935	0.000000124	gain	yes	-0.0000566	0.0000112	-5.053771715	0.000000742	neg	yes	0.001913573	0.003278924	0.583597866	0.559915255	pos	ns	0.2518777	-0.00012311	0.000112762	-1.09176715	0.275783239	neg	ns	0.782544311	Snd1	Snd1_Intron	6	28538008	28538057	28538008	28538009	50	-	CGTTTTAGCTGATCTGTGCTGTTTGTAGCCATATGGTCCCCTGAGCACGT	Intron (Snd1-203/Snd1, intron 8 of 16)	6	28480348	28877723	397376	1	Snd1-203	57660	Snd1-203;Snd1-201;Snd1-206	Snd1;Snd1;Snd1	0;0;0	TRUE
6267	cg21533331	0.00000264	0.00000704	0.375389387	0.707627615	gain	ns	0.0000604	0.000012	5.050264446	0.000000754	pos	yes	0.008680106	0.003504789	2.476641728	0.013795796	pos	ns	1.860253238	0.00000312	0.000120529	0.025912728	0.979343621	pos	ns	0.124768892	Tshz3	Tshz3_Promoter	7	36690738	36690787	36690738	36690739	50	+	CGCCAGTCTGGTCAATTTATCATGCAAATGTGGGTGCCCTCCGCGCCAGA	Promoter (7-8kb)	7	36698118	36773553	75436	1	Tshz3-201	-7331	NA	NA	NA	FALSE
20943	cg18408272	0.000184787	0.0000105	17.6667276	8.23E-49	gain	yes	-0.0000897	0.0000178	-5.048669282	0.00000076	neg	yes	-0.010859378	0.005205852	-2.085994317	0.03779643	neg	ns	1.422549216	0.000740372	0.000179029	4.135492386	0.0000457	pos	ns	0.450961871	Elp4	Elp4_Intron	2	105779525	105779574	105779573	105779574	50	+	TATTATCCATCCTCATTAATGACAATGGGAAAGTTTATCTTGGGAACACG	Intron (Elp4-202/Elp4, intron 9 of 9)	2	105701027	105904564	203538	2	Elp4-202	124990	Elp4-202;Elp4-201	Elp4;Elp4	0;0	TRUE
510	cg15044753	0.000195586	0.0000173	11.30675463	4.75E-25	gain	yes	-0.000148311	0.0000294	-5.0467798	0.000000767	neg	yes	0.023012466	0.008609453	2.672930051	0.007917209	pos	ns	2.101427904	-0.001102961	0.000296078	-3.725233104	0.000231807	neg	ns	0.334138921	Tox	Tox_Intron	4	6718460	6718509	6718460	6718461	50	-	CGACTGTGTCTCCAATTAGGAACTTAAGGTTCATTTAGTAATTTACATCT	Intron (Tox-201/Tox, intron 5 of 8)	4	6686353	6990799	304447	2	Tox-201	272290	Tox-201	Tox	0	TRUE
18468	cg16007694	0.0000715	0.00000598	11.96644589	2.19E-27	gain	yes	-0.0000512	0.0000102	-5.044304718	0.000000776	neg	yes	0.004074411	0.002974265	1.369888162	0.171713184	pos	ns	0.765196358	-0.000279073	0.000102285	-2.72838886	0.006727568	neg	ns	0.890602242	Fggy	Fggy_Exon	4	95822042	95822091	95822090	95822091	50	+	GGTTTCCTTACTGTTGATTTACATGTTTGGCCAGATTTCCATGGCAACCG	Exon (Fggy-202/Fggy, exon 11 of 16)	4	95557507	95926939	369433	1	Fggy-202	264535	Fggy-202;Fggy-216;Fggy-208;Fggy-201;Fggy-203;Fggy-211;Fggy-204;Fggy-205;Fggy-215	Fggy;Fggy;Fggy;Fggy;Fggy;Fggy;Fggy;Fggy;Fggy	0;0;0;242621;0;0;185155;0;0	TRUE
1109	cg12231138	-0.0000226	0.0000101	-2.235189456	0.026116893	loss	ns	0.0000868	0.0000172	5.043544152	0.000000779	pos	yes	0.041309733	0.005043217	8.191147152	6.85E-15	pos	yes	14.16420904	-0.001520139	0.000173436	-8.764849733	1.25E-16	neg	yes	0.223552704	Gm14515	Gm14515_Intergenic_downstream	X	11631252	11631301	11631252	11631253	50	+	CGTGTGGTGAAAGAATTTGCTGGAATCTGCAAGGGAGCTCCTGGCAGCAA	Distal Intergenic	20	11601354	11601569	216	1	Gm14515-201	29898	NA	NA	NA	FALSE
22134	cg18396508	-0.00000717	0.00000571	-1.256753915	0.209788884	loss	ns	0.0000489	0.0000097	5.041549285	0.000000787	pos	yes	0.009627947	0.002841122	3.388783178	0.000792747	pos	ns	3.100865275	-0.000168357	0.0000977	-1.723099595	0.085867697	neg	ns	0.909691975	Osbpl8	Osbpl8_Exon	10	111288697	111288746	111288697	111288698	50	-	CGACCATGGGACCCACTTAATGATATGATACAGTTTGAAAAAGATGGTGT	Exon (Osbpl8-202/Osbpl8, exon 21 of 24)	10	111164752	111297249	132498	1	Osbpl8-202	123945	Osbpl8-202;Osbpl8-201;Osbpl8-205	Osbpl8;Osbpl8;Osbpl8	0;0;0	TRUE
190	cg26980821	0.0000126	0.00000512	2.470784857	0.014019245	gain	ns	-0.0000438	0.00000869	-5.039971448	0.000000793	neg	yes	0.009785045	0.002546043	3.843236034	0.000147316	pos	ns	3.831750972	-0.000320888	0.0000876	-3.66485293	0.000291038	neg	ns	0.936024553	Ascc2	Ascc2_Exon	11	4646605	4646654	4646605	4646606	50	+	CGCCCCCTAAAGACAACATTCCCGCCCTAGTGGAGGAGTACCTGGAACGC	Exon (Ascc2-201/Ascc2, exon 3 of 20)	11	4637747	4683385	45639	1	Ascc2-201	8858	Ascc2-201;Ascc2-202	Ascc2;Ascc2	0;0	TRUE
2656	cg24556765	0.00000839	0.00000274	3.065191797	0.002366612	gain	ns	-0.0000234	0.00000465	-5.039801589	0.000000794	neg	yes	-0.002462924	0.001361627	-1.808808727	0.071449457	neg	ns	1.146001066	-0.000054	0.0000468	-1.153143874	0.249739687	neg	ns	0.920794846	Vcl	Vcl_Exon	14	21027178	21027227	21027178	21027179	50	+	CGATTACGAACCTGAGCTGCTGTTAATGCCATCCAATCAGCCGGTCAACC	Exon (Vcl-202/Vcl, exon 3 of 3)	14	20929398	21033676	104279	1	Vcl-201	97780	Ap3m1-206;Vcl-201;Vcl-202	Ap3m1;Vcl;Vcl	25223;0;0	TRUE
27273	cg16372141	0.0000138	0.0000114	1.206194333	0.228662307	gain	ns	0.0000978	0.0000194	5.033757785	0.000000817	pos	yes	0.024018416	0.005691354	4.220158186	0.0000321	pos	ns	4.493475839	-0.000226938	0.000195725	-1.159472999	0.24715572	neg	ns	0.311169038	Rbbp7	Rbbp7_Exon	X	162761641	162761690	162761641	162761642	50	-	CGTTTCTATATGACCTGGTTATGACCCATGCTCTTCAGTGGCCCAGTCTT	Exon (Rbbp7-201/Rbbp7, exon 2 of 12)	20	162760402	162779092	18691	1	Rbbp7-201	1239	Rbbp7-201;Rbbp7-203;Rbbp7-202;Rbbp7-204	Rbbp7;Rbbp7;Rbbp7;Rbbp7	0;0;0;0	TRUE
22171	cg18713221	-0.00000176	0.00000272	-0.645559458	0.51904223	loss	ns	-0.0000233	0.00000463	-5.033820063	0.000000817	neg	yes	0.000475493	0.001355335	0.350830845	0.725953546	pos	ns	0.139091169	-0.0000907	0.0000466	-1.94599066	0.052559281	neg	ns	0.953526127	Eif5	Eif5_threeUTR	12	111540192	111540241	111540192	111540193	50	+	CGTTACATTGTCAATGGATCTCATGAGGCGAATAAGCTGCAAGACATGTT	3' UTR	12	111538016	111546752	8737	1	Eif5-202	2176	Eif5-202;Eif5-214;Eif5-209;Eif5-204;Eif5-212;Eif5-213;Eif5-207;Eif5-210;Eif5-201;Eif5-203;Eif5-208;Eif5-211;Eif5-215;Eif5-217;Eif5-216;Eif5-205;Eif5-206	Eif5;Eif5;Eif5;Eif5;Eif5;Eif5;Eif5;Eif5;Eif5;Eif5;Eif5;Eif5;Eif5;Eif5;Eif5;Eif5;Eif5	0;0;1976;0;0;0;0;0;0;0;0;0;0;0;0;-1984;-2590	TRUE
25594	cg21451202	0.0000191	0.0000165	1.159676115	0.247073107	gain	ns	-0.000140966	0.000028	-5.032681201	0.000000821	neg	yes	0.000321473	0.008205996	0.039175432	0.968775738	pos	ns	0.013776746	-0.0000743	0.000282204	-0.263206915	0.792565956	neg	ns	0.677209909	Srrt	Srrt_threeUTR	5	137301291	137301340	137301291	137301292	50	-	CGCAGGCATCACCTCCAGGATCTTTACCTTGGCCGCTTGGTCAAACAGAG	3' UTR	5	137295704	137307674	11971	2	Srrt-201	6334	Srrt-201;Srrt-212;Srrt-209;Srrt-211;Srrt-202;Srrt-216;Srrt-205;Srrt-206;Srrt-208;Srrt-217;Srrt-207;Srrt-213;Srrt-215;Srrt-204;Srrt-214;Srrt-203;Srrt-218;Srrt-210	Srrt;Srrt;Srrt;Srrt;Srrt;Srrt;Srrt;Srrt;Srrt;Srrt;Srrt;Srrt;Srrt;Srrt;Srrt;Srrt;Srrt;Srrt	0;0;0;0;-1646;-3866;-4357;-4074;-4438;-3724;-2744;-1282;-973;-1405;0;-560;0;6300	TRUE
24685	cg22749775	0.00013383	0.00000841	15.91190955	4.34E-42	gain	yes	-0.0000719	0.0000143	-5.031785905	0.000000825	neg	yes	-0.01014984	0.00418608	-2.424664663	0.015893882	neg	ns	1.798770019	0.000342617	0.000143959	2.37996031	0.017918975	pos	ns	0.248675075	Neurog2	Neurog2_Promoter	3	127625903	127625952	127625951	127625952	50	-	CACTCTTGTAAATATGAAAGATGCTAATCATATGACATATCACGTCTCCG	Promoter (7-8kb)	3	127633135	127635631	2497	1	Neurog2-201	-7232	NA	NA	NA	FALSE
8725	cg12553580	0.0000969	0.00000597	16.23412334	2.55E-43	gain	yes	-0.0000509	0.0000101	-5.022630155	0.000000862	neg	yes	-0.000205666	0.002969825	-0.06925178	0.944833856	neg	ns	0.024644553	0.0000765	0.000102132	0.74891786	0.454474584	pos	ns	0.729247462	Fbxw4	Fbxw4_Intron	19	45617040	45617089	45617088	45617089	50	+	ATTCTTTTGACCTGCACCTAATCAAAGATTCACCGGCCCTTTCAAATCCG	Intron (Fbxw4-206/Fbxw4, intron 1 of 4)	19	45578254	45631138	52885	2	Fbxw4-206	14049	Fbxw4-206;Fbxw4-201;Fbxw4-208	Fbxw4;Fbxw4;Fbxw4	0;0;0	TRUE
18421	cg05560670	0.0000969	0.00000594	16.33104952	1.08E-43	gain	yes	-0.0000506	0.0000101	-5.016046899	0.00000089	neg	yes	-0.003757044	0.002954315	-1.271714064	0.204427963	neg	ns	0.689459698	0.000166808	0.000101599	1.641837311	0.101637755	pos	ns	0.849481828	Csnk2a2	Csnk2a2_threeUTR	8	95477213	95477262	95477261	95477262	50	-	ACGGGGTCCTTTACAGTGTCAATCAGCTTAATGATATTTGTTCCACCACG	3' UTR	8	95446096	95488827	42732	2	Csnk2a2-201	11565	Csnk2a2-201;Csnk2a2-203;Csnk2a2-207;Csnk2a2-210;Csnk2a2-204;Csnk2a2-205;Csnk2a2-202;Csnk2a2-206	Csnk2a2;Csnk2a2;Csnk2a2;Csnk2a2;Csnk2a2;Csnk2a2;Csnk2a2;Csnk2a2	0;0;0;0;0;0;0;0	TRUE
26174	cg05630725	0.000142394	0.0000121	11.72809561	1.55E-26	gain	yes	-0.000103388	0.0000206	-5.012392945	0.000000906	neg	yes	0.017543719	0.006042853	2.903218055	0.003958502	pos	ns	2.402469178	-0.001316069	0.000207813	-6.33294355	8.44E-10	neg	yes	0.485402807	Sox5	Sox5_Intron	6	144210906	144210955	144210954	144210955	50	-	TGATTAGATTTTCTGTGGAGAATTCCACGAGGAAATTCCCTTCAAAGCCG	Intron (Sox5-209/Sox5, intron 4 of 13)	6	143843739	144781977	938239	2	Sox5-209	571022	Sox5-201;Sox5-214;Sox5-205;Sox5-202;Sox5-209;Sox5-210;Sox5-212;Sox5-213	Sox5;Sox5;Sox5;Sox5;Sox5;Sox5;Sox5;Sox5	0;0;0;0;0;0;0;0	TRUE
25506	cg00046614	0.0000722	0.0000068	10.61664087	1.16E-22	gain	yes	-0.0000579	0.0000116	-5.006004434	0.000000934	neg	yes	-0.013493559	0.003386156	-3.984919906	0.0000842	neg	ns	4.074648775	0.000349885	0.00011645	3.004604802	0.002876189	pos	ns	0.860021779	Mgmt	Mgmt_Intron	7	137025278	137025327	137025326	137025327	50	+	AAAGTTGGATTTGAGCAACATCAAGTGAAATGTCTTCCCATCTCACGCCG	Intron (Mgmt-201/Mgmt, intron 2 of 4)	7	136894614	137130266	235653	1	Mgmt-201	130664	Mgmt-201	Mgmt	0	TRUE
25335	cg09169719	-0.0000746	0.0000132	-5.639648989	3.84E-08	loss	yes	-0.000112541	0.0000225	-5.005984334	0.000000934	neg	yes	0.042057206	0.006586258	6.385599055	6.23E-10	pos	ns	9.205329296	-0.000818367	0.000226501	-3.613084406	0.000352891	neg	ns	0.862063108	Srrm1	Srrm1_Exon	4	135346357	135346406	135346357	135346358	50	+	CGACATTGGGACACTCACTCTGCTGTGACCTAATAAGGTGATGGTGCTAT	Exon (Srrm1-212/Srrm1, exon 3 of 16)	4	135320484	135353321	32838	2	Srrm1-203	6915	Srrm1-203;Srrm1-202;Srrm1-208;Srrm1-201;Srrm1-212;Srrm1-204;Srrm1-214;Srrm1-205;Srrm1-207;Srrm1-209;Srrm1-206	Srrm1;Srrm1;Srrm1;Srrm1;Srrm1;Srrm1;Srrm1;Srrm1;Srrm1;Srrm1;Srrm1	0;0;0;0;0;0;0;0;0;0;0	TRUE
17290	cg09667213	0.000120924	0.0000113	10.72016195	5.12E-23	gain	yes	-0.0000959	0.0000192	-5.005139025	0.000000938	neg	yes	0.007790303	0.005614217	1.387602856	0.166254627	pos	ns	0.779226259	0.000107465	0.000193072	0.556605623	0.57819849	pos	ns	0.335306089	Shc1	Shc1_fiveUTR	3	89422261	89422310	89422261	89422262	50	-	CGGGAGCTTTGTCAATAAGCCCACGCGGGGCTGGCTGCATCCCAACGACA	5' UTR	3	89418443	89430015	11573	1	Shc1-201	3818	Cks1b-201;Cks1b-202;Cks1b-203;Shc1-201;Shc1-204;Shc1-210;Shc1-209;Shc1-205;Shc1-203;Shc1-208;Shc1-202;Shc1-206;Shc1-207	Cks1b;Cks1b;Cks1b;Shc1;Shc1;Shc1;Shc1;Shc1;Shc1;Shc1;Shc1;Shc1;Shc1	0;0;0;0;0;0;0;0;0;0;0;0;-2216	TRUE
9140	cg24006557	0.0000744	0.0000207	3.587433174	0.00038793	gain	ns	0.000176373	0.0000353	5.00346519	0.000000945	pos	yes	-0.002462094	0.010327098	-0.238411019	0.811719839	neg	ns	0.090593839	0.000909212	0.000355148	2.560094062	0.010938232	pos	ns	0.674598497	Samd4	Samd4_Exon	14	47083554	47083603	47083602	47083603	50	-	CTCTTTCGGTCTTTCCCTCGGAAAACCCTTCTAGACATATCAGGATATCG	Exon (Samd4-201/Samd4, exon 9 of 13)	14	46882854	47103150	220297	1	Samd4-201	200700	Samd4-201;Samd4-211;Samd4-202;Samd4-206;Samd4-203;Samd4-204;Samd4-210;Samd4-205	Samd4;Samd4;Samd4;Samd4;Samd4;Samd4;Samd4;Samd4	0;0;0;0;0;0;0;-3532	TRUE
16308	cg04952588	-0.00000523	0.0000148	-0.354156523	0.723462353	loss	ns	0.000125581	0.0000251	5.001133072	0.000000956	pos	yes	0.023269537	0.007356556	3.163102091	0.001715651	pos	ns	2.765571005	-0.000401146	0.000252991	-1.585609973	0.11384732	neg	ns	0.752471701	Mrm1	Mrm1_Intergenic_downstream	11	84726276	84726325	84726276	84726277	50	+	CGGTTCTGTAAATGACATTCTGTACTGTTAGCATTTTAAATGTGGCACAA	Distal Intergenic	11	84814743	84815390	648	2	Mrm1-203	89065	NA	NA	NA	FALSE
5675	cg09654498	0.0000855	0.0000225	3.806831253	0.000169635	gain	ns	-0.000190615	0.0000382	-4.996283972	0.000000978	neg	yes	0.091800139	0.011177061	8.213262861	5.89E-15	pos	yes	14.22987078	-0.002326758	0.000384378	-6.053302471	4.09E-09	neg	yes	0.609852301	Mapkap1	Mapkap1_Intron	2	34535181	34535230	34535229	34535230	50	-	AAGCAATTTGGATGCTTGCCAGGAGTCATTGTTCACCCTCGGCTGTGGCG	Intron (Mapkap1-204/Mapkap1, intron 6 of 10)	2	34406862	34623475	216614	1	Mapkap1-204	128319	Mapkap1-204;Mapkap1-202;Mapkap1-201;Mapkap1-209;Mapkap1-203;Mapkap1-207	Mapkap1;Mapkap1;Mapkap1;Mapkap1;Mapkap1;Mapkap1	0;0;0;0;0;0	TRUE
5477	cg04830281	0.0000184	0.00000609	3.020534325	0.002733259	gain	ns	-0.0000517	0.0000103	-4.995625234	0.000000981	neg	yes	0.006667549	0.003029165	2.201117482	0.028464522	pos	ns	1.545696105	-0.000543195	0.000104173	-5.214371214	0.000000338	neg	yes	0.849567205	Dnajc19	Dnajc19_threeUTR	3	34058152	34058201	34058152	34058153	50	+	CGTCTCTTCTGTACAAGGTTCTAGGTCTTATAGCGGAAGAGGCAGAGGTC	3' UTR	3	34056020	34081312	25293	2	Dnajc19-201	23111	Dnajc19-201;Fxr1-201;Fxr1-202;Fxr1-207;Fxr1-206;Fxr1-204;Fxr1-208	Dnajc19;Fxr1;Fxr1;Fxr1;Fxr1;Fxr1;Fxr1	0;0;0;0;0;0;0	TRUE
14740	cg02714778	-0.00000352	0.00000779	-0.452264316	0.651394887	loss	ns	-0.0000661	0.0000132	-4.995579833	0.000000982	neg	yes	0.00769658	0.003878034	1.984660203	0.048063589	pos	ns	1.318183799	-0.000746923	0.000133365	-5.600578073	4.71E-08	neg	yes	0.776714804	Git1	Git1_Exon	11	77506497	77506546	77506497	77506498	50	-	CGCCCCAGTGGACTTCCAGCTGCTGACTCAGCAGGTGATCCAGTGCGCCT	Exon (Git1-201/Git1, exon 20 of 20)	11	77493562	77507786	14225	1	Git1-201	12935	Git1-201;Git1-202;Git1-206;Git1-203;Git1-205;Git1-204;Trp53i13-201;Trp53i13-203;Trp53i13-202;Trp53i13-204	Git1;Git1;Git1;Git1;Git1;Git1;Trp53i13;Trp53i13;Trp53i13;Trp53i13	0;0;7406;5509;4018;1361;6824;6217;6489;9185	TRUE
8593	cg25830020	0.0000436	0.00000449	9.707770265	1.26E-19	gain	yes	-0.0000381	0.00000764	-4.985040999	0.00000103	neg	yes	-0.006331574	0.002237115	-2.830241255	0.004954957	neg	ns	2.304960096	0.000156587	0.0000769	2.035341773	0.042666774	pos	ns	0.801317661	Btrc	Btrc_Exon	19	45423148	45423197	45423196	45423197	50	+	TCTCTGTGGCTGGGCTGCTCCAGCCTGGCGGACAGCATGCCTTCGCTGCG	Exon (Btrc-201/Btrc, exon 2 of 15)	19	45363734	45507736	144003	1	Btrc-204	59414	Btrc-204;Btrc-201;Btrc-210;Btrc-206;Btrc-202;Btrc-207;Btrc-203	Btrc;Btrc;Btrc;Btrc;Btrc;Btrc;Btrc	0;0;0;0;0;0;0	TRUE
1798	cg21202820	-0.000000296	0.0000109	-0.02710672	0.978392056	loss	ns	0.0000923	0.0000185	4.984906594	0.00000103	pos	yes	0.014825159	0.005426044	2.732222421	0.006651632	pos	ns	2.17707181	-0.000223731	0.000186601	-1.198979475	0.231451612	neg	ns	0.685109458	Gm5513	Gm5513_Intergenic_upstream	19	15340846	15340895	15340894	15340895	50	-	ATAATGGATATCCTGGGGGCTGTGAGAACACGTTGATTTATGCAACCTCG	Distal Intergenic	19	14959549	14960766	1218	2	Gm5513-201	-380129	NA	NA	NA	FALSE
23382	cg12939608	0.0000476	0.00000406	11.72214047	1.63E-26	gain	yes	-0.0000344	0.0000069	-4.983087194	0.00000104	neg	yes	-0.000280856	0.002020036	-0.139035063	0.88951272	neg	ns	0.050847837	-0.0000595	0.0000695	-0.856509894	0.392377392	neg	ns	0.863021804	Smg1	Smg1_Exon	7	118212475	118212524	118212523	118212524	50	+	GGTGAACTCAGGGCTGGTCACATTGTTAACCCTCAGCTCTTGCCCCAACG	Exon (Smg1-201/Smg1, exon 3 of 63)	7	118131308	118243637	112330	2	Smg1-201	31113	Smg1-201;Smg1-204;Smg1-209;Smg1-206;Smg1-203;Smg1-205	Smg1;Smg1;Smg1;Smg1;Smg1;Smg1	0;0;0;0;0;0	TRUE
17052	cg18230558	-0.0000173	0.0000173	-1.00070634	0.317749273	loss	ns	0.000146612	0.0000294	4.982853405	0.00000104	pos	yes	0.031356315	0.00862001	3.637619259	0.000322178	pos	ns	3.491904383	-0.000440724	0.000296441	-1.486713906	0.138106731	neg	ns	0.329498792	Il1rapl1	Il1rapl1_fiveUTR	X	88115619	88115668	88115619	88115620	50	-	CGACGGGGTTTTCCTTGTACAGTACTGCTATGTGAAAGCACACAACCCCT	Promoter (<=1kb)	20	86740870	88115645	1374776	2	Il1rapl1-203	0	Il1rapl1-203;Il1rapl1-202	Il1rapl1;Il1rapl1	0;0	TRUE
10293	cg21296237	0.0000449	0.00000311	14.44297076	1.64E-36	gain	yes	-0.0000263	0.00000528	-4.979102285	0.00000106	neg	yes	-0.004058619	0.00154782	-2.622152175	0.009169038	neg	ns	2.03767622	0.000107976	0.0000532	2.02850607	0.04336321	pos	ns	0.942073606	Hibadh	Hibadh_Intron	6	52567451	52567500	52567499	52567500	50	+	TCACAGGGACCATTTACGACTTGCTATGGTGTCTCTATTGTTTACCAGCG	Intron (Hibadh-201/Hibadh, intron 4 of 7)	6	52546228	52640389	94162	2	Hibadh-201	72889	Hibadh-201;Hibadh-203	Hibadh;Hibadh	0;0	TRUE
8403	cg19100188	0.00000252	0.0000104	0.242626447	0.808455239	gain	ns	0.0000879	0.0000176	4.979011197	0.00000106	pos	yes	0.023076457	0.005170143	4.463408083	0.0000113	pos	ns	4.946709886	-0.000444223	0.000177801	-2.498429682	0.012992045	neg	ns	0.339482079	Zeb2	Zeb2_threeUTR	2	45097120	45097169	45097168	45097169	50	-	AAATACCTCCAGGGAAAACCCTGAAACTGATGAACAGTTATGTCAAGTCG	3' UTR	2	44983632	45117395	133764	2	Zeb2-212	20226	Zeb2-212;Zeb2-213;Zeb2-201;Zeb2-202;Zeb2-215;Zeb2-214;Zeb2-203;Zeb2-221;Zeb2-220;Zeb2-216;Zeb2-222;Zeb2-208;Zeb2-228;Zeb2-226;Zeb2-209;Zeb2-224;Zeb2-207;Zeb2-219;Zeb2-211	Zeb2;Zeb2;Zeb2;Zeb2;Zeb2;Zeb2;Zeb2;Zeb2;Zeb2;Zeb2;Zeb2;Zeb2;Zeb2;Zeb2;Zeb2;Zeb2;Zeb2;Zeb2;Zeb2	0;0;0;0;0;0;0;0;0;0;0;0;0;0;0;0;0;0;0	TRUE
25975	cg04745590	0.0000348	0.0000122	2.851824186	0.004638796	gain	ns	0.000103214	0.0000207	4.976572336	0.00000108	pos	yes	0.015282952	0.006076136	2.515242123	0.012400574	pos	ns	1.906558217	-0.00026623	0.000208958	-1.274083717	0.203588075	neg	ns	0.157002553	Tmem164	Tmem164_fiveUTR	X	142682294	142682343	142682342	142682343	50	+	GGCCAACGGCTCCTTTCAACCCTGCCTCGTTGGTGGCCACTGGAGAAGCG	Promoter (<=1kb)	20	142681406	142843494	162089	1	Tmem164-204	888	Tmem164-204;Tmem164-202;Tmem164-205;Tmem164-201;Tmem164-206;Tmem164-208;Tmem164-207	Tmem164;Tmem164;Tmem164;Tmem164;Tmem164;Tmem164;Tmem164	0;0;0;0;0;0;0	TRUE
661	cg11075694	0.0000246	0.0000103	2.379409844	0.017945265	gain	ns	0.0000873	0.0000176	4.969632923	0.00000111	pos	yes	0.022639694	0.0051458	4.399645258	0.0000149	pos	ns	4.825941564	-0.000310857	0.000176964	-1.756612652	0.079971161	neg	ns	0.683070684	Ppp1r3f	Ppp1r3f_Exon	X	7573342	7573391	7573390	7573391	50	+	GCTGCTGCTGGGGCAGCCCTTCGGCATCAGTGGGTGTGGGAGCGGGTGCG	Promoter (<=1kb)	20	7557296	7574283	16988	2	Ppp1r3f-205	892	Foxp3-209;Ppp1r3f-205;Ppp1r3f-201;Ppp1r3f-203	Foxp3;Ppp1r3f;Ppp1r3f;Ppp1r3f	-253;0;0;-499	TRUE
17994	cg05623230	0.0000297	0.0000147	2.016736199	0.044584966	gain	ns	0.000124126	0.000025	4.959107444	0.00000117	pos	yes	0.032644437	0.007332908	4.451772038	0.0000119	pos	ns	4.924567478	-0.000718167	0.000252178	-2.847854324	0.004695535	neg	ns	0.397650322	Arx	Arx_Intron	X	93291098	93291147	93291098	93291099	50	+	CGGTAAACAGGTTGTAAGCCGTTTTACAGCATCTTAATGGTTTCCTATTT	Intron (Arx-201/Arx, intron 2 of 4)	20	93286496	93298357	11862	1	Arx-201	4602	Arx-203;Arx-201;Arx-202	Arx;Arx;Arx	4653;0;0	TRUE
14927	cg08566952	-0.0000329	0.0000167	-1.967429792	0.050025015	loss	ns	0.000140904	0.0000284	4.955912117	0.00000119	pos	yes	0.009468439	0.008329438	1.136744031	0.256523241	pos	ns	0.590873281	-0.0000617	0.000286449	-0.215238101	0.829723221	neg	ns	0.401841059	Nr2f1	Nr2f1_Intron	13	78177904	78177953	78177952	78177953	50	-	ACTTAGCGCTTGTCTGACAAAACAATGTCCTTTAACTTTATTACACATCG	Intron (3110006O06Rik-201/3110006O06Rik-201, intron 1 of 1)	13	78189872	78190443	572	2	Nr2f1-204	12539	NA	NA	NA	TRUE
25205	cg08796800	-0.00000248	0.0000101	-0.244766843	0.806798906	loss	ns	0.0000853	0.0000172	4.951309072	0.00000121	pos	yes	0.013004312	0.005046332	2.576983061	0.010428813	pos	ns	1.981765127	-0.000319111	0.000173543	-1.838802339	0.066900661	neg	ns	0.143622615	Pcdh19	Pcdh19_Promoter	X	133691433	133691482	133691481	133691482	50	-	TTGTGGCGAAGGCTGTCAGGAACCCACTGATCAATAAAAGTAAACTGGCG	Promoter (2-3kb)	20	133582860	133688987	106128	2	Pcdh19-202	-2495	Pcdh19-202;Pcdh19-203	Pcdh19;Pcdh19	0;0	FALSE
27246	cg03837769	0.0000909	0.0000133	6.819158668	4.80E-11	gain	yes	0.000112048	0.0000226	4.947657307	0.00000123	pos	yes	0.03516408	0.006634698	5.300026971	0.00000022	pos	ns	6.657058922	-0.000498189	0.000228167	-2.183441809	0.029752844	neg	ns	0.385864327	Nhs	Nhs_Exon	X	161908714	161908763	161908762	161908763	50	-	ATGCTGCCTTCTGATGAGGAAGTCGACTGGGGAGGTCTCTGCGCACGGCG	Exon (Gm15202-201/Gm15202-201, exon 2 of 2)	20	161833296	162159730	326435	2	Nhs-202	250967	Nhs-202;Nhs-201	Nhs;Nhs	0;0	TRUE
19559	cg03779905	0.0000152	0.00000796	1.913510413	0.056603581	gain	ns	0.0000668	0.0000135	4.944575542	0.00000125	pos	yes	0.020153231	0.003959617	5.089692351	0.000000623	pos	ns	6.205466275	-0.000406176	0.000136171	-2.982837188	0.003082596	neg	ns	0.445428889	Tmem28	Tmem28_Exon	X	99821614	99821663	99821662	99821663	50	+	AAAAAACTTGCTCAAAGGCCACTTTCGGAACTTCACTCTCTCCTTTTGCG	Promoter (<=1kb)	20	99821021	99848790	27770	1	Tmem28-201	593	Tmem28-201	Tmem28	0	TRUE
21315	cg24992459	0.0000792	0.0000106	7.455836349	9.01E-13	gain	yes	-0.0000892	0.000018	-4.943106181	0.00000126	neg	yes	0.004039732	0.005284727	0.764416472	0.445200561	pos	ns	0.351444297	0.000107892	0.000181741	0.59365467	0.553176019	pos	ns	0.777939441	Nfat5	Nfat5_Intron	8	107332191	107332240	107332239	107332240	50	-	CCAGAGACACTTAACCCATCCAATCTCACCCAGGGTATAGGTCGGTCTCG	Intron (Nfat5-213/Nfat5, intron 2 of 14)	8	107293470	107372227	78758	1	Nfat5-213	38721	Nfat5-212;Nfat5-213;Nfat5-214;Nfat5-206;Nfat5-210;Nfat5-211;Nfat5-203;Nfat5-201	Nfat5;Nfat5;Nfat5;Nfat5;Nfat5;Nfat5;Nfat5;Nfat5	0;0;0;0;0;0;0;0	TRUE
19417	cg15840225	0.000226839	0.0000137	16.53070044	1.87E-44	gain	yes	-0.000115147	0.0000233	-4.939328398	0.00000128	neg	yes	0.01035508	0.006829721	1.516179078	0.13049309	pos	ns	0.884412485	-0.000319855	0.000234874	-1.361817335	0.174244348	neg	ns	0.629819431	Gm12689	Gm12689_Intergenic_upstream	4	99282243	99282292	99282243	99282244	50	+	CGAGTTGTAACAAGAACAAGATGAGCTTGTGGCCTCGGGCTTCTAACCTG	Distal Intergenic	4	99295900	99297258	1359	1	Gm12689-201	-13608	NA	NA	NA	FALSE
14732	cg11287852	0.0000377	0.0000192	1.963540914	0.050476914	gain	ns	-0.000161273	0.0000326	-4.940391088	0.00000128	neg	yes	0.010186166	0.009563509	1.06510764	0.287656101	pos	ns	0.54112641	-0.000871094	0.000328888	-2.648601713	0.0084964	neg	ns	0.567794919	Rnf165	Rnf165_Exon	18	77484384	77484433	77484432	77484433	50	+	GCTGCTGCGGCTGCGGGGGGCCCAGGTGGAAGTGGCGGCAGGAGGTAGCG	Exon (Rnf165-201/Rnf165, exon 2 of 8)	18	77456110	77565136	109027	2	Rnf165-201	80703	Rnf165-201;Rnf165-202;Rnf165-204;Rnf165-206	Rnf165;Rnf165;Rnf165;Rnf165	0;0;0;0	TRUE
17989	cg17962021	0.0000287	0.0000184	1.563466783	0.118963072	gain	ns	0.000153939	0.0000312	4.937958166	0.00000129	pos	yes	0.029514591	0.009133102	3.231606525	0.001363353	pos	ns	2.865391639	-0.000860585	0.000314087	-2.739961881	0.006500681	neg	ns	0.253686208	Arx	Arx_Promoter	X	93282673	93282722	93282673	93282674	50	+	CGACGCTTGTTATCCTCACAAGGCTTCAGTTTGTTTGCCTGATCTCAGCA	Promoter (3-4kb)	20	93286445	93288382	1938	1	Arx-203	-3723	Arx-203;Arx-201;Arx-202	Arx;Arx;Arx	-3723;0;0	FALSE
25666	cg22940022	0.0000936	0.000013	7.177716159	5.27E-12	gain	yes	-0.000109392	0.0000222	-4.936288375	0.0000013	neg	yes	0.048718683	0.006492365	7.503996064	6.60E-13	pos	yes	12.18030227	-0.002157097	0.000223272	-9.661302727	1.78E-19	neg	yes	0.632279955	Mcm7	Mcm7_Exon	5	138165338	138165387	138165338	138165339	50	-	CGAGACAAGTGCAATGCCCAGGGCAGCGTCCAGCAATTGCCCAAGTCTCC	Exon (Mcm7-202/Mcm7, exon 1 of 2)	5	138164583	138172422	7840	2	Mcm7-201	7035	Cops6-201;Cops6-202;Cops6-203;Cops6-205;Cops6-204;Mcm7-201;Mcm7-202;Mcm7-208;Mcm7-205;Mcm7-209;Mcm7-203;Mcm7-204;Mcm7-210;Mcm7-207;Mcm7-206	Cops6;Cops6;Cops6;Cops6;Cops6;Mcm7;Mcm7;Mcm7;Mcm7;Mcm7;Mcm7;Mcm7;Mcm7;Mcm7;Mcm7	4267;4238;4229;4169;2561;0;0;0;4994;5879;4256;5630;6428;5274;5854	TRUE
848	cg09194982	-0.000025	0.00000904	-2.768108117	0.005977467	loss	ns	0.0000758	0.0000154	4.93659008	0.0000013	pos	yes	0.007985732	0.004497506	1.775591432	0.076781275	pos	ns	1.114744681	-0.0000317	0.000154669	-0.2051746	0.83757037	neg	ns	0.20190965	Gm49447	Gm49447_Intergenic_upstream	16	9009454	9009503	9009454	9009455	50	+	CGCAGCTTTTTTTGGGTCTAGAGAGCCAGTTTCCATGATGAAAGTGGCAC	Distal Intergenic	16	8996088	8996396	309	2	Gm49447-201	-13058	NA	NA	NA	FALSE
16804	cg20668096	0.0000296	0.0000121	2.44980303	0.014846308	gain	ns	-0.000101158	0.0000205	-4.931481533	0.00000133	neg	yes	-0.00573798	0.006009538	-0.954812133	0.340416659	neg	ns	0.467989195	-0.000339159	0.000206668	-1.641083347	0.101794253	neg	ns	0.871022745	Lrba	Lrba_Intron	3	86551296	86551345	86551344	86551345	50	-	CCACTTCAAGTCTTCAGACCGATTCATCTGTATTCTCTTGTTATAATCCG	Intron (Lrba-202/Lrba, intron 40 of 50)	3	86224680	86746712	522033	1	Lrba-202	326616	Lrba-202;Lrba-204;Lrba-201;Lrba-203;Lrba-205;Lrba-206;Mab21l2-201;Mab21l2-202	Lrba;Lrba;Lrba;Lrba;Lrba;Lrba;Mab21l2;Mab21l2	0;0;0;0;0;0;0;0	TRUE
15682	cg03811583	0.0000131	0.0000132	0.992764547	0.321598972	gain	ns	0.000110596	0.0000224	4.931291911	0.00000133	pos	yes	0.015134722	0.006570488	2.303439535	0.02191561	pos	ns	1.659246444	-0.0000369	0.000225959	-0.163162311	0.870496954	neg	ns	0.224509813	Gm14741	Gm14741_Intergenic_upstream	X	82814771	82814820	82814771	82814772	50	-	CGTTGTAGCAGCTGCATAATAAATGACTGAAAGAATCATGTTAGGCATGC	Distal Intergenic	20	82757430	82758438	1009	2	Gm14741-201	-56382	NA	NA	NA	FALSE
22093	cg22741677	-0.00000296	0.0000217	-0.136362354	0.891623344	loss	ns	0.00018204	0.0000369	4.931832232	0.00000133	pos	yes	0.033095303	0.010813725	3.060490495	0.002402961	pos	ns	2.619253277	-0.000479797	0.000371883	-1.290182841	0.197948727	neg	ns	0.390267337	Pou3f4	Pou3f4_threeUTR	X	110816162	110816211	110816162	110816163	50	+	CGGTGTTTTACTACAATCTGTACACAATATTTGTGAGATAATTTGTATCT	3' UTR	20	110814280	110817207	2928	1	Pou3f4-201	1882	Pou3f4-201	Pou3f4	0	TRUE
2577	cg03817728	-0.0000112	0.00000653	-1.70639821	0.088935442	loss	ns	0.0000547	0.0000111	4.928816078	0.00000135	pos	yes	0.008377536	0.003252281	2.575895151	0.010460977	pos	ns	1.980427771	-0.0000549	0.000111846	-0.490521026	0.62411227	neg	ns	0.884682871	Rbm10	Rbm10_Intron	X	20641117	20641166	20641117	20641118	50	-	CGGGAACGCCGTGTGTCCAAAGCTGTTGACTAACCCACTGCGTCTGTATC	Intron (Rbm10-205/Rbm10, intron 5 of 23)	20	20617503	20650888	33386	1	Rbm10-205	23614	Rbm10-205;Rbm10-204;Rbm10-203;Rbm10-206;Rbm10-201;Rbm10-202;Rbm10-207	Rbm10;Rbm10;Rbm10;Rbm10;Rbm10;Rbm10;Rbm10	0;0;0;0;0;0;0	TRUE
1689	cg10990973	0.000162657	0.0000212	7.685719487	2.02E-13	gain	yes	-0.000176806	0.000036	-4.917537345	0.00000142	neg	yes	0.084740925	0.01053333	8.045027238	1.85E-14	pos	yes	13.73313935	-0.00198351	0.00036224	-5.475672891	9.02E-08	neg	yes	0.64902931	Tle4	Tle4_Intron	19	14590327	14590376	14590327	14590328	50	-	CGAGCCTTTTATCTGCCCTGGACAGCATTTTCTCCAGCAGATGAAGTAGA	Intron (Tle4-201/Tle4, intron 4 of 19)	19	14448150	14598051	149902	2	Tle4-201	7675	Tle4-201;Tle4-202;Tle4-203	Tle4;Tle4;Tle4	0;0;0	TRUE
11250	cg21667939	0.0000331	0.00000917	3.60714428	0.00036073	gain	ns	-0.0000767	0.0000156	-4.918641825	0.00000142	neg	yes	0.002524957	0.004565518	0.553049326	0.580628231	pos	ns	0.236101852	-0.00031858	0.000157008	-2.029068798	0.043305516	neg	ns	0.829214428	Tomm70a	Tomm70a_Exon	16	57134731	57134780	57134731	57134732	50	-	CGTGCAAAAGCCCATGAGAAGCTAGACAATAAGAAGGAATGTTTAGAAGG	Exon (Tomm70a-201/Tomm70a, exon 3 of 12)	16	57121703	57156705	35003	1	Tomm70a-201	13028	Tomm70a-201;Tomm70a-202	Tomm70a;Tomm70a	0;-2718	TRUE
1606	cg20998727	-0.0000117	0.0000162	-0.723747403	0.469766608	loss	ns	0.000135199	0.0000275	4.918859612	0.00000142	pos	yes	0.03560101	0.008052446	4.421142271	0.0000136	pos	ns	4.866502332	-0.000982695	0.000276923	-3.548620782	0.000447211	neg	ns	0.397319487	Cask	Cask_Intron	X	13844889	13844938	13844937	13844938	50	+	CTTGGTTTCATTTCCCAACTGTGGACCTTAAAATAGACAATAAAGCACCG	Intron (Cask-203/Cask, intron 1 of 24)	20	13517080	13846541	329462	2	Cask-203	1603	Cask-203;Cask-204;Cask-201;Cask-210;Cask-205;Cask-208;Cask-211	Cask;Cask;Cask;Cask;Cask;Cask;Cask	0;0;0;0;0;0;1797	TRUE
11898	cg12433048	0.0000675	0.00000673	10.02666321	1.12E-20	gain	yes	-0.0000561	0.0000114	-4.908732452	0.00000148	neg	yes	0.009792647	0.003348867	2.924167271	0.003708326	pos	ns	2.430822079	-0.000327864	0.000115167	-2.846855156	0.004709914	neg	ns	0.717616243	Csnk1a1	Csnk1a1_Intron	18	61571793	61571842	61571793	61571794	50	+	CGGTGTTGCCTGTCTGCGCCGGCCATTGTTGCAATGTAAGCAATACTGTT	Intron (Csnk1a1-204/Csnk1a1, intron 4 of 9)	18	61555274	61590061	34788	1	Csnk1a1-204	16519	Csnk1a1-204;Csnk1a1-206;Csnk1a1-201;Csnk1a1-207;Csnk1a1-202;Csnk1a1-210;Csnk1a1-208;Csnk1a1-203	Csnk1a1;Csnk1a1;Csnk1a1;Csnk1a1;Csnk1a1;Csnk1a1;Csnk1a1;Csnk1a1	0;0;0;0;0;0;0;0	TRUE
4403	cg07962869	0.0000855	0.0000115	7.425348629	1.10E-12	gain	yes	-0.0000959	0.0000196	-4.904313221	0.00000152	neg	yes	0.029066492	0.005729027	5.073547519	0.000000674	pos	ns	6.171392157	-0.000677659	0.000197021	-3.439530906	0.000662516	neg	ns	0.662326269	Lrrc4	Lrrc4_Intron	6	28817178	28817227	28817226	28817227	50	-	TGGACAGGTCCAAGCTGTCTGAGCCATCAGCAGCTGCACCTCCTCCCTCG	Intron (Snd1-203/Snd1, intron 15 of 16)	6	28661831	28830345	168515	2	Lrrc4-202	13118	Lrrc4-202;Snd1-203;Snd1-201;Snd1-206;Snd1-210;Snd1-209	Lrrc4;Snd1;Snd1;Snd1;Snd1;Snd1	0;0;0;0;0;0	TRUE
11158	cg02275649	-0.0000457	0.000012	-3.821130933	0.000160511	loss	ns	0.0000996	0.0000203	4.899916363	0.00000155	pos	yes	0.013606725	0.005954278	2.285201426	0.022976064	pos	ns	1.638724375	-0.000125089	0.000204767	-0.610882623	0.541724927	neg	ns	0.449487641	Fhl1	Fhl1_Exon	X	56791382	56791431	56791430	56791431	50	+	TCGTGGGTGGTGGTTCTTTATAGAAAAAATCGAAGCTTAGCAGCTCCTCG	Exon (Fhl1-203/Fhl1, exon 7 of 8)	20	56731787	56793346	61560	1	Fhl1-201	59595	Fhl1-201;Fhl1-203;Fhl1-206;Fhl1-205;Fhl1-204;Fhl1-202;Fhl1-210;Fhl1-207;Fhl1-208;Fhl1-209	Fhl1;Fhl1;Fhl1;Fhl1;Fhl1;Fhl1;Fhl1;Fhl1;Fhl1;Fhl1	0;0;0;0;0;0;11563;0;3657;3384	TRUE
25667	cg23994606	0.000076	0.0000106	7.143672933	6.52E-12	gain	yes	-0.0000885	0.0000181	-4.894927992	0.00000158	neg	yes	0.041286839	0.005295352	7.79680717	9.73E-14	pos	yes	13.01209095	-0.001792948	0.000182107	-9.84558804	4.44E-20	neg	yes	0.623872236	Mcm7	Mcm7_Exon	5	138165316	138165365	138165364	138165365	50	-	TGTTGGGCCGGCACTGTCAGACCGAGACAAGTGCAATGCCCAGGGCAGCG	Exon (Mcm7-202/Mcm7, exon 1 of 2)	5	138164583	138172422	7840	2	Mcm7-201	7057	Cops6-201;Cops6-202;Cops6-203;Cops6-205;Cops6-204;Mcm7-201;Mcm7-202;Mcm7-208;Mcm7-205;Mcm7-209;Mcm7-203;Mcm7-204;Mcm7-210;Mcm7-207;Mcm7-206	Cops6;Cops6;Cops6;Cops6;Cops6;Mcm7;Mcm7;Mcm7;Mcm7;Mcm7;Mcm7;Mcm7;Mcm7;Mcm7;Mcm7	4245;4216;4207;4147;2539;0;0;0;5016;5901;4278;5652;6450;5296;5876	TRUE
27579	cg16878881	-0.0000294	0.0000102	-2.876444919	0.004300623	loss	ns	0.0000848	0.0000173	4.893073948	0.0000016	pos	yes	0.013174076	0.005078869	2.59389952	0.009939934	pos	ns	2.002616497	-0.000276555	0.000174662	-1.58337433	0.114355788	neg	ns	0.883910754	Tshz2	Tshz2_threeUTR	2	170071274	170071323	170071322	170071323	50	-	TTTTTCATTAAAACTTTGAGGGCCCAATTTTAATTTGTGGAATATTCCCG	3' UTR	2	169884893	170071816	186924	1	Tshz2-203	186381	Tshz2-203;Tshz2-205	Tshz2;Tshz2	0;0	TRUE
26173	cg07322848	0.0000674	0.0000107	6.282067511	1.13E-09	gain	yes	-0.0000892	0.0000182	-4.890544702	0.00000162	neg	yes	0.018976702	0.005340619	3.553277516	0.000439674	pos	ns	3.356869176	-0.00106074	0.000183663	-5.775456954	1.87E-08	neg	yes	0.149945451	Sox5	Sox5_Intron	6	144210933	144210982	144210933	144210934	50	+	CGAGGAAATTCCCTTCAAAGCCGAAGTGATTAACTGGGGGCTATTCTGGA	Intron (Sox5-209/Sox5, intron 4 of 13)	6	143843739	144781977	938239	2	Sox5-209	570995	Sox5-201;Sox5-214;Sox5-205;Sox5-202;Sox5-209;Sox5-210;Sox5-212;Sox5-213	Sox5;Sox5;Sox5;Sox5;Sox5;Sox5;Sox5;Sox5	0;0;0;0;0;0;0;0	TRUE
25160	cg12068417	-0.0000694	0.000028	-2.482420834	0.013578417	loss	ns	-0.000232132	0.0000475	-4.88715608	0.00000164	neg	yes	-0.007850973	0.013915398	-0.564193218	0.573030599	neg	ns	0.241822187	0.001913206	0.000478549	3.997928365	0.0000799	pos	ns	0.774614102	Wasf2	Wasf2_threeUTR	4	133198148	133198197	133198196	133198197	50	+	TGGTAATGATCTGCAAGTCCCGGAGAGCAACAGCACAGCTCTGCCTGACG	3' UTR	4	133130505	133199756	69252	1	Wasf2-201	67643	Wasf2-201;Wasf2-202	Wasf2;Wasf2	0;0	TRUE
56	cg03124868	0.0000289	0.00000998	2.891983641	0.004098918	gain	ns	-0.0000828	0.000017	-4.884683982	0.00000166	neg	yes	0.040866525	0.004966014	8.229241421	5.28E-15	pos	yes	14.27737901	-0.001198258	0.000170781	-7.016349125	1.44E-11	neg	yes	0.842178204	Ankib1	Ankib1_Exon	5	3701925	3701974	3701925	3701926	50	-	CGAAGGTAAGGCCTATTGACTTTCTGGGCAAGGTCTTCAGTGACCATTTC	Exon (Ankib1-201/Ankib1, exon 16 of 20)	5	3690000	3802925	112926	2	Ankib1-201	100951	Ankib1-201;Ankib1-203;Ankib1-206;Ankib1-205	Ankib1;Ankib1;Ankib1;Ankib1	0;0;0;-56	TRUE
23704	cg00321644	0.00000171	0.00000351	0.486027565	0.627290995	gain	ns	-0.0000292	0.00000597	-4.884923369	0.00000166	neg	yes	-0.001730677	0.001748703	-0.989692174	0.323096447	neg	ns	0.490667818	0.0000148	0.0000601	0.245474146	0.806251754	pos	ns	0.908196559	Wnk1	Wnk1_Exon	6	119963553	119963602	119963553	119963554	50	-	CGTTCATGAATAGTTGGGAAAAATATCTGTGATTCTGGGTATGTTGGGGT	Exon (Wnk1-203/Wnk1, exon 9 of 28)	6	119923969	120038672	114704	2	Wnk1-202	75070	Wnk1-202;Wnk1-203;Wnk1-223;Wnk1-204;Wnk1-224;Wnk1-221;Wnk1-214;Wnk1-211;Wnk1-206;Wnk1-210;Wnk1-218	Wnk1;Wnk1;Wnk1;Wnk1;Wnk1;Wnk1;Wnk1;Wnk1;Wnk1;Wnk1;Wnk1	0;0;0;0;0;0;0;0;0;-623;0	TRUE
21214	cg13681420	-0.0000595	0.000012	-4.971549828	0.0000011	loss	yes	-0.0000991	0.0000203	-4.87650361	0.00000173	neg	yes	-0.010594209	0.005953618	-1.779457427	0.076144442	neg	ns	1.118361792	-0.000138733	0.000204744	-0.677591045	0.498536409	neg	ns	0.637733992	Ddx5	Ddx5_threeUTR	11	106783271	106783320	106783319	106783320	50	+	CCAAGAAGCCAGGATTCACTTGAGAATGTGTCTCTCTCTGGCAGGTCTCG	3' UTR	11	106780355	106788532	8178	2	Ddx5-201	5212	Ddx5-201;Ddx5-208;Ddx5-205;Ddx5-207;Ddx5-203;Ddx5-202;Ddx5-209;Ddx5-206;Ddx5-204;Polg2-201;Polg2-203;Polg2-206;Polg2-204;Polg2-202	Ddx5;Ddx5;Ddx5;Ddx5;Ddx5;Ddx5;Ddx5;Ddx5;Ddx5;Polg2;Polg2;Polg2;Polg2;Polg2	0;0;0;0;0;0;2730;0;0;-3756;-3734;-3798;-3798;-3769	TRUE
6284	cg18625283	0.0000853	0.0000183	4.661462305	0.00000467	gain	ns	-0.000151182	0.0000311	-4.862810219	0.00000184	neg	yes	0.031390422	0.009108124	3.44642003	0.000646464	pos	ns	3.189455562	0.001136814	0.000313228	3.629353882	0.000332232	pos	ns	0.445635782	Nrn1	Nrn1_fiveUTR	13	36730127	36730176	36730127	36730128	50	+	CGTCTTGTCGTCCAGGCCCTGCGGGTAGTTGGCCATGCTGTCGCCCAGCT	Promoter (<=1kb)	13	36725361	36730680	5320	2	Nrn1-204	504	Fars2-211;Nrn1-204;Nrn1-201;Nrn1-203;Nrn1-202;Nrn1-205	Fars2;Nrn1;Nrn1;Nrn1;Nrn1;Nrn1	8201;0;0;0;0;0	TRUE
22810	cg19641802	0.0000377	0.00003	1.256150913	0.210007092	gain	ns	0.00024776	0.000051	4.858993341	0.00000188	pos	ns	0.041669371	0.014938312	2.789429741	0.005606831	pos	ns	2.251282551	-0.000375439	0.000513727	-0.730813981	0.465444764	neg	ns	0.537077755	Faah	Faah_Intron	4	115972595	115972644	115972643	115972644	50	+	ACAAATGTGGCTGCTGGGGAAAGTGACACGGGCTCCAGGTGATGGATTCG	Intron (Faah-202/Faah, intron 13 of 14)	4	115967145	116017675	50531	2	Faah-202	45031	Faah-202	Faah	0	TRUE
25360	cg16982757	0.000150777	0.0000111	13.6407193	1.65E-33	gain	yes	-0.0000911	0.0000188	-4.852413424	0.00000194	neg	ns	-0.007930584	0.005501412	-1.441554407	0.150437517	neg	ns	0.822643843	0.000772935	0.000189193	4.085431419	0.0000561	pos	ns	0.820082323	Gm9341	Gm9341_Intergenic_downstream	7	135965751	135965800	135965799	135965800	50	+	TGCCTGTGTTTGTCTTTGGCTCTCAGAAGGACAAAATTCACCATGTGGCG	Distal Intergenic	7	135952798	135953783	986	1	Gm9341-201	12953	NA	NA	NA	FALSE
2553	cg06012376	-0.00000375	0.0000145	-0.259270395	0.795598705	loss	ns	-0.000119069	0.0000246	-4.849289211	0.00000196	neg	ns	0.030063714	0.007193465	4.179309236	0.0000381	pos	ns	4.419364239	-0.001393167	0.000247383	-5.631625851	0.00000004	neg	yes	0.782477438	Ppp3cb	Ppp3cb_Exon	14	20508641	20508690	20508641	20508642	50	+	CGTCCTCCAGCTAACACTCCACTAGGCAACATCCCTGTGGGAGTCAGGCC	Exon (Ppp3cb-202/Ppp3cb, exon 12 of 14)	14	20499364	20546573	47210	2	Ppp3cb-202	37883	Ppp3cb-202;Ppp3cb-205;Ppp3cb-201;Ppp3cb-208;Ppp3cb-206;Ppp3cb-207	Ppp3cb;Ppp3cb;Ppp3cb;Ppp3cb;Ppp3cb;Ppp3cb	0;0;0;0;0;0	TRUE
23441	cg11830277	0.0000325	0.0000094	3.454307037	0.000628534	gain	ns	0.0000775	0.000016	4.84780064	0.00000198	pos	ns	0.016376378	0.00468069	3.498710519	0.000535963	pos	ns	3.270865422	-0.000194353	0.000160969	-1.207400561	0.228198329	neg	ns	0.201561466	Gm5672	Gm5672_Intergenic_upstream	14	118436129	118436178	118436177	118436178	50	+	TATTTGAGAGTAAGTAACCATTTAATCTGATGCTAACTGAAAAATCACCG	Distal Intergenic	14	118375261	118376194	934	2	Gm5672-201	-59935	NA	NA	NA	FALSE
15274	cg01928902	-0.00000114	0.00000834	-0.136591632	0.891442254	loss	ns	0.0000686	0.0000142	4.840705828	0.00000204	pos	ns	0.014393224	0.004152071	3.466517008	0.00060169	pos	ns	3.220627471	-0.000343799	0.000142789	-2.407732908	0.016635781	neg	ns	0.208427413	Zfp36l1	Zfp36l1_Exon	12	80112812	80112861	80112860	80112861	50	-	CCTTTACCTTGCATAAAACTTCGCTCAAGTCGAAGATGGTGGCAGACACG	Promoter (<=1kb)	12	80107754	80113013	5260	2	Zfp36l1-201	152	Zfp36l1-201;Zfp36l1-202;Zfp36l1-204;Zfp36l1-203	Zfp36l1;Zfp36l1;Zfp36l1;Zfp36l1	0;0;0;0	TRUE
26825	cg00857814	0.000178203	0.0000106	16.75964292	2.48E-45	gain	yes	-0.0000874	0.0000181	-4.839850792	0.00000205	neg	ns	0.01195847	0.005292095	2.259685457	0.024534724	pos	ns	1.610218819	-0.000637031	0.000181995	-3.500274869	0.000532947	neg	ns	0.495475954	Smg7	Smg7_Exon	1	152845418	152845467	152845418	152845419	50	+	CGTTGCTGGCTGTAAGGAATGTGGGACTGTTTCCCAGCTTGCACCTGGTT	Exon (Smg7-202/Smg7, exon 16 of 22)	1	152836995	152902622	65628	2	Smg7-202	57155	Smg7-202;Smg7-201;Smg7-203;Smg7-204;Smg7-205;Smg7-206	Smg7;Smg7;Smg7;Smg7;Smg7;Smg7	0;0;0;0;0;3453	TRUE
4424	cg26282474	0.0000965	0.00000805	11.98207519	1.92E-27	gain	yes	-0.0000661	0.0000137	-4.833712612	0.00000211	neg	ns	-0.010576461	0.004008835	-2.638288016	0.008753228	neg	ns	2.05783178	0.00031958	0.000137864	2.318089786	0.021095014	pos	ns	0.827262941	Ddx31	Ddx31_Intron	2	28885202	28885251	28885202	28885203	50	+	CGGTCCTGGCTGCCCGGCTTTCAATATTGCTTTGACAACCATTCTGCCCT	Intron (Ddx31-201/Ddx31, intron 17 of 19)	2	28840459	28905571	65113	1	Ddx31-201	44743	Ddx31-201	Ddx31	0	TRUE
8248	cg15777606	0.0000277	0.00000854	3.244205749	0.001306362	gain	ns	-0.0000701	0.0000145	-4.833004812	0.00000212	neg	ns	0.024468013	0.004248124	5.759721846	2.03E-08	pos	ns	7.692636736	-0.00078143	0.000146093	-5.348864003	0.000000172	neg	yes	0.674178642	Jarid2	Jarid2_Exon	13	44902430	44902479	44902478	44902479	50	-	GTCAACCACACAATCTCAGGGAAAACTGAAAGTAGCAATGCAAAAACCCG	Exon (Jarid2-210/Jarid2, exon 8 of 19)	13	44730774	44920108	189335	1	Jarid2-210	171656	Jarid2-210;Jarid2-201;Jarid2-209;Jarid2-208;Jarid2-216;Jarid2-211	Jarid2;Jarid2;Jarid2;Jarid2;Jarid2;Jarid2	0;0;0;0;0;0	TRUE
11410	cg10839068	0.0000145	0.0000134	1.076844587	0.28238699	gain	ns	0.000110245	0.0000228	4.826807704	0.00000218	pos	ns	0.023469245	0.006691374	3.507387791	0.000519433	pos	ns	3.284470164	-0.000419248	0.000230116	-1.821898731	0.069433847	neg	ns	0.54926047	Zic3	Zic3_Exon	X	58034495	58034544	58034543	58034544	50	+	TAGCACCAGCCACAACCCTGGACTTCCTCCTAATTTTAACGAATGGTACG	Exon (Zic3-201/Zic3, exon 3 of 3)	20	58030643	58036559	5917	1	Zic3-201	3852	Zic3-204;Zic3-201;Zic3-203;Zic3-202	Zic3;Zic3;Zic3;Zic3	0;0;0;0	TRUE
14743	cg02171705	0.0000112	0.0000104	1.080045673	0.2809614	gain	ns	0.000085	0.0000176	4.824845817	0.0000022	pos	ns	0.022467177	0.005162177	4.352267596	0.0000183	pos	ns	4.737107382	-0.000463807	0.000177527	-2.612603673	0.00942336	neg	ns	0.131176408	Tbl1x	Tbl1x_Promoter	X	77509265	77509314	77509313	77509314	50	+	TGATGTCAACTTGTTATTTACTTTCCAAATCTGAATGACTGAGCAAGGCG	Promoter (1-2kb)	20	77511013	77662983	151971	1	Tbl1x-201	-1699	Tbl1x-201;Tbl1x-202	Tbl1x;Tbl1x	-1699;-1900	FALSE
3294	cg18230121	-0.0000537	0.0000125	-4.29170823	0.0000237	loss	ns	0.000102595	0.0000213	4.823905794	0.00000221	pos	ns	0.013938408	0.006230813	2.237012788	0.025996146	pos	ns	1.58509104	-0.000459265	0.000214277	-2.143321344	0.032865317	neg	ns	0.686546049	Gm11889	Gm11889_Intergenic_downstream	4	23505166	23505215	23505166	23505167	50	+	CGATATTATTGTTGACTGTGCTAATAAAACACCTCCCGTGACCCTGATGC	Distal Intergenic	4	23517362	23518440	1079	2	Gm11889-201	13225	NA	NA	NA	FALSE
1112	cg10340181	0.0000354	0.000013	2.71511195	0.006996652	gain	ns	0.00010676	0.0000221	4.821687696	0.00000223	pos	ns	0.034616806	0.006486717	5.336567779	0.000000183	pos	ns	6.736954992	-0.000881687	0.000223078	-3.952376756	0.0000959	neg	ns	0.35945877	Gm14515	Gm14515_Intergenic_downstream	X	11631301	11631350	11631349	11631350	50	+	AGAAAATGCGTTGATTCACTCCCAAATCTGCTTTGCCCAAGCCGGGTGCG	Distal Intergenic	20	11601354	11601569	216	1	Gm14515-201	29947	NA	NA	NA	FALSE
17127	cg21960772	0.0000386	0.0000105	3.684599543	0.000270255	gain	ns	-0.0000858	0.0000178	-4.818958587	0.00000226	neg	ns	0.021569224	0.005218101	4.133539039	0.000046	pos	ns	4.337012272	-0.000751391	0.00017945	-4.187189855	0.0000368	neg	ns	0.746160179	Ubqln4	Ubqln4_Exon	3	88563286	88563335	88563286	88563287	50	+	CGACAGTCTCGAACCCCTTTGGGATCAATGCGGCTAGCCTGGGGTCAGGT	Exon (Ubqln4-201/Ubqln4, exon 6 of 11)	3	88553758	88569725	15968	1	Ubqln4-201	9528	Ubqln4-201;Ubqln4-204;Ubqln4-202;Ubqln4-205	Ubqln4;Ubqln4;Ubqln4;Ubqln4	0;0;0;-572	TRUE
27581	cg20512638	-0.00000448	0.00000459	-0.977228734	0.3292179	loss	ns	0.0000375	0.00000779	4.818627609	0.00000227	pos	ns	0.008948659	0.002282179	3.921102198	0.000108551	pos	ns	3.9643658	-0.0001948	0.0000785	-2.482032763	0.013592918	neg	ns	0.918128839	Tshz2	Tshz2_threeUTR	2	170071378	170071427	170071426	170071427	50	+	ACGTAAAAATTCCAATAGAACTGTATTAGATTTTCTCCATTAAATTAACG	3' UTR	2	169884893	170071816	186924	1	Tshz2-203	186485	Tshz2-203;Tshz2-205	Tshz2;Tshz2	0;0	TRUE
27382	cg15444935	-0.0000526	0.0000114	-4.632175909	0.00000533	loss	ns	-0.0000929	0.0000193	-4.815210408	0.0000023	neg	ns	0.049299264	0.005652411	8.721812012	1.70E-16	pos	yes	15.76904107	-0.001512692	0.000194386	-7.781900982	1.07E-13	neg	yes	0.788561999	Pou2f1	Pou2f1_Exon	1	165902162	165902211	165902162	165902163	50	-	CGTCTTTGTTTGAAGGTCTTGGCAAACTGCTCAAGCTCCTCAAGGTCACT	Exon (Pou2f1-205/Pou2f1, exon 9 of 17)	1	165865154	165934948	69795	2	Pou2f1-205	32737	Pou2f1-205;Pou2f1-208;Pou2f1-207;Pou2f1-206;Pou2f1-216;Pou2f1-209;Pou2f1-204;Pou2f1-201;Pou2f1-202;Pou2f1-213;Pou2f1-203;Pou2f1-215	Pou2f1;Pou2f1;Pou2f1;Pou2f1;Pou2f1;Pou2f1;Pou2f1;Pou2f1;Pou2f1;Pou2f1;Pou2f1;Pou2f1	0;0;0;0;0;0;0;0;0;0;0;0	TRUE
27150	cg08071218	-0.0000172	0.000012	-1.426502879	0.154729557	loss	ns	0.0000984	0.0000204	4.815163034	0.0000023	pos	ns	0.016703348	0.005987163	2.789860455	0.005599563	pos	ns	2.251845851	-0.000563206	0.000205898	-2.735366039	0.00658994	neg	ns	0.527215419	Tnr	Tnr_Intron	1	159578487	159578536	159578487	159578488	50	-	CGAGGCCAATAAAGGCAATGAGAGGCAAGGTTATTGATGTCTGTCTGAGG	Intron (Tnr-202/Tnr, intron 1 of 22)	1	159523769	159931729	407961	1	Tnr-202	54718	Tnr-202;Tnr-205	Tnr;Tnr	0;0	TRUE
5983	cg02458378	-0.0000354	0.0000125	-2.843408835	0.00475982	loss	ns	-0.000101909	0.0000212	-4.812666712	0.00000233	neg	ns	-0.006642392	0.006203603	-1.070731334	0.285123174	neg	ns	0.544967482	-0.000529832	0.000213341	-2.483494991	0.01353835	neg	ns	0.518173739	Ddr1	Ddr1_Exon	17	35686483	35686532	35686531	35686532	50	+	TGGGTGTTGGTGGGTTTGGCCCAGGCGGGTGTGGGGGGGCCCGGGCCTCG	Exon (Ddr1-204/Ddr1, exon 12 of 18)	17	35681567	35700610	19044	2	Ddr1-204	14078	Ddr1-204;Ddr1-203;Ddr1-212;Ddr1-202;Ddr1-201;Ddr1-211;Ddr1-210;Ddr1-209;Ddr1-205;Ddr1-208;Ddr1-207	Ddr1;Ddr1;Ddr1;Ddr1;Ddr1;Ddr1;Ddr1;Ddr1;Ddr1;Ddr1;Ddr1	0;0;0;0;0;0;0;17445;18089;11439;15514	TRUE
1607	cg15931112	0.00000583	0.0000101	0.578292718	0.563486371	gain	ns	0.0000824	0.0000171	4.812941114	0.00000233	pos	ns	0.019401287	0.005015716	3.868099522	0.000133702	pos	ns	3.873863424	-0.000443651	0.00017249	-2.572038118	0.010575724	neg	ns	0.448276386	Cask	Cask_Intron	X	13845267	13845316	13845315	13845316	50	+	ATGAAAGGATGAGCATTTGGACTGTCAGTTCTATATTCTAGACCAGCCCG	Intron (Cask-203/Cask, intron 1 of 24)	20	13517080	13846541	329462	2	Cask-203	1225	Cask-203;Cask-204;Cask-201;Cask-210;Cask-205;Cask-208;Cask-211	Cask;Cask;Cask;Cask;Cask;Cask;Cask	0;0;0;0;0;0;1419	TRUE
25599	cg23102356	-0.0000499	0.00000964	-5.177189066	0.000000406	loss	yes	0.0000787	0.0000164	4.806826219	0.00000239	pos	ns	0.011474675	0.004797954	2.391576979	0.017372005	pos	ns	1.760150047	-0.000358169	0.000165001	-2.17070575	0.030712084	neg	ns	0.674058518	Ebf3	Ebf3_Intron	7	137303022	137303071	137303022	137303023	50	+	CGGCATTAGGCCCAAATTACACGATATTAATACTTGAACAGGTGCAGAAA	Intron (Ebf3-204/Ebf3, intron 6 of 15)	7	137193673	137314445	120773	2	Ebf3-204	11374	Ebf3-204;Ebf3-201;Ebf3-202;Ebf3-203;Ebf3-208;Ebf3-206	Ebf3;Ebf3;Ebf3;Ebf3;Ebf3;Ebf3	0;0;0;0;0;0	TRUE
2962	cg25463057	-0.00000396	0.00000501	-0.790844026	0.429639624	loss	ns	0.0000409	0.00000852	4.807614856	0.00000239	pos	ns	0.006252828	0.002495331	2.505810681	0.012729357	pos	ns	1.895193532	-0.0000514	0.0000858	-0.599361028	0.549369939	neg	ns	0.918890552	Lrmda	Lrmda_Intron	14	22176356	22176405	22176404	22176405	50	-	TAGGTTGTTTGTCTCTGCTGCTGACTAACCATGCAATCTATCAGAGGCCG	Intron (Lrmda-201/Lrmda, intron 2 of 6)	14	22019712	23056085	1036374	1	Lrmda-201	156644	Lrmda-201;Lrmda-204;Lrmda-203;Lrmda-206	Lrmda;Lrmda;Lrmda;Lrmda	0;0;0;0	TRUE
11460	cg06275769	-0.000005	0.0000108	-0.462368454	0.644141468	loss	ns	-0.0000882	0.0000184	-4.803169773	0.00000244	neg	ns	0.031252425	0.005379198	5.809866675	1.55E-08	pos	ns	7.809543026	-0.001084818	0.00018499	-5.864192558	1.16E-08	neg	yes	0.854568483	Hnrnpk	Hnrnpk_fiveUTR	13	58397765	58397814	58397813	58397814	50	+	CTGCTGTCTGGGACTGAAACACTGGCATTGTACTGCATTGGTCATTGGCG	5' UTR	13	58391142	58403343	12202	2	Hnrnpk-202	5529	Hnrnpk-202;Hnrnpk-224;Hnrnpk-221;Hnrnpk-232;Hnrnpk-216;Hnrnpk-201;Hnrnpk-205;Hnrnpk-217;Hnrnpk-206;Hnrnpk-209;Hnrnpk-213;Hnrnpk-227;Hnrnpk-234;Hnrnpk-233;Hnrnpk-228;Hnrnpk-214;Hnrnpk-215;Hnrnpk-211;Hnrnpk-208;Hnrnpk-212;Hnrnpk-231;Hnrnpk-230;Hnrnpk-203;Hnrnpk-218;Hnrnpk-226;Hnrnpk-207;Hnrnpk-219;Hnrnpk-225;Hnrnpk-229;Hnrnpk-223;Hnrnpk-220;Hnrnpk-210;Hnrnpk-204;Hnrnpk-222;Rmi1-205;Rmi1-201;Rmi1-204	Hnrnpk;Hnrnpk;Hnrnpk;Hnrnpk;Hnrnpk;Hnrnpk;Hnrnpk;Hnrnpk;Hnrnpk;Hnrnpk;Hnrnpk;Hnrnpk;Hnrnpk;Hnrnpk;Hnrnpk;Hnrnpk;Hnrnpk;Hnrnpk;Hnrnpk;Hnrnpk;Hnrnpk;Hnrnpk;Hnrnpk;Hnrnpk;Hnrnpk;Hnrnpk;Hnrnpk;Hnrnpk;Hnrnpk;Hnrnpk;Hnrnpk;Hnrnpk;Hnrnpk;Hnrnpk;Rmi1;Rmi1;Rmi1	0;0;0;0;0;0;0;-3897;-2980;-3790;-2567;-3681;-3876;-3595;-3069;0;-2045;0;0;0;0;0;0;0;0;0;0;0;0;0;0;0;4688;4241;-4434;-4449;-4886	TRUE
3285	cg19192708	-0.0000334	0.00000616	-5.420033402	0.00000012	loss	yes	0.0000502	0.0000105	4.800531262	0.00000247	pos	ns	0.011830524	0.003064852	3.860063698	0.000137966	pos	ns	3.860228852	-0.000329181	0.0001054	-3.12315705	0.001958146	neg	ns	0.84821459	Cadps2	Cadps2_Intron	6	23464398	23464447	23464398	23464399	50	+	CGATTCTCAATATGTAATCAAAAATTATGGCTGGAAGTGTTTCACAATGT	Intron (Cadps2-213/Cadps2, intron 9 of 29)	6	23262773	23839137	576365	2	Cadps2-213	374690	Cadps2-213;Cadps2-205;Cadps2-212;Cadps2-201;Cadps2-209;Cadps2-206;Cadps2-207;Cadps2-202;Cadps2-204	Cadps2;Cadps2;Cadps2;Cadps2;Cadps2;Cadps2;Cadps2;Cadps2;Cadps2	0;0;0;0;0;0;0;0;0	TRUE
6362	cg13193974	0.0000188	0.000003	6.273227015	1.19E-09	gain	yes	-0.0000245	0.0000051	-4.799591	0.00000248	neg	ns	0.007034108	0.001495536	4.70340271	0.00000386	pos	ns	5.413625207	-0.000233532	0.0000514	-4.540656503	0.00000804	neg	ns	0.924035374	Hdac2	Hdac2_Exon	10	36997078	36997127	36997078	36997079	50	-	CGATGTTGGACATATGAGACTGCAGTTGCCCTTGATTGTGAGATTCCCAA	Exon (Hdac2-201/Hdac2, exon 9 of 14)	10	36974544	37001889	27346	1	Hdac2-201	22534	Hdac2-201;Hdac2-202;Hdac2-204;Hdac2-203	Hdac2;Hdac2;Hdac2;Hdac2	0;22508;0;-1045	TRUE
22191	cg03039483	0.0000134	0.0000141	0.945648182	0.345064546	gain	ns	0.00011494	0.000024	4.785932729	0.00000264	pos	ns	0.026312758	0.007035909	3.739780749	0.000219342	pos	ns	3.658877324	-0.000393277	0.000241964	-1.625352981	0.105103541	neg	ns	0.401249708	Hdx	Hdx_fiveUTR	X	111697069	111697118	111697117	111697118	50	+	CTTCAGACAATGAAATCAGCGTGTCCGATCATCAATTCTCATCATGATCG	Promoter (<=1kb)	20	111569931	111697079	127149	2	Hdx-202	0	Hdx-202;Hdx-201	Hdx;Hdx	0;0	TRUE
2278	cg05563253	-0.0000355	0.0000134	-2.65387671	0.008367678	loss	ns	-0.000108776	0.0000227	-4.781560521	0.00000269	neg	ns	0.047047813	0.006664692	7.059262621	1.10E-11	pos	yes	10.95769329	-0.001282699	0.000229198	-5.596461078	4.82E-08	neg	yes	0.48289483	Gm28539	Gm28539_threeUTR	16	18896673	18896722	18896673	18896674	50	+	CGGCCTGCTGTCTGAAGGCACAGATGTTGGCTGCACACCTGGGTGAGTTA	3' UTR	16	18836584	18956247	119664	1	Gm28539-201	60089	Gm28539-201;Hira-202;Hira-201;Hira-206;Hira-208;Hira-203	Gm28539;Hira;Hira;Hira;Hira;Hira	0;0;0;0;0;0	TRUE
12156	cg19705440	-0.0000117	0.0000138	-0.84663299	0.397852809	loss	ns	0.000112145	0.0000235	4.781017916	0.0000027	pos	ns	0.018444072	0.006871928	2.683973559	0.007666218	pos	ns	2.115418833	-0.000173913	0.000236325	-0.735906538	0.462344029	neg	ns	0.290956745	Skor1	Skor1_Promoter	9	63152069	63152118	63152069	63152070	50	+	CGGCAGTTTTCGTCAGTTAATTAGGTTTAATTTACATAATTAGTACAGTA	Promoter (3-4kb)	9	63138170	63148961	10792	2	Skor1-202	-3108	Skor1-202	Skor1	0	FALSE
4882	cg10340825	-0.0000152	0.00000446	-3.422088777	0.000704837	loss	ns	-0.0000362	0.00000757	-4.778958996	0.00000273	neg	ns	0.003462403	0.002217569	1.5613509	0.119461236	pos	ns	0.922772998	-0.000465415	0.0000763	-6.102843255	3.11E-09	neg	yes	0.772118577	Aplp2	Aplp2_Exon	9	31152330	31152379	31152378	31152379	50	-	CTCCAACTCTCTCGGCATTGAAAATCATTTCCTTAACATCCAGAGTCTCG	Exon (Aplp2-209/Aplp2, exon 14 of 16)	9	31149557	31211787	62231	2	Aplp2-209	59408	Aplp2-209;Aplp2-201;Aplp2-202;Aplp2-207;Aplp2-205;Aplp2-203	Aplp2;Aplp2;Aplp2;Aplp2;Aplp2;Aplp2	0;0;0;0;0;0	TRUE
22172	cg01914744	-0.00000613	0.00000495	-1.239847507	0.215969506	loss	ns	-0.0000401	0.0000084	-4.773520988	0.00000279	neg	ns	0.01007844	0.002462088	4.093452328	0.0000543	pos	ns	4.265485318	-0.000301285	0.0000847	-3.558296947	0.000431684	neg	ns	0.924822151	Eif5	Eif5_threeUTR	12	111540220	111540269	111540220	111540221	50	-	CGAATAAGCTGCAAGACATGTTGGATGGATTCATTAAAAAATTTGTTCTC	3' UTR	12	111538016	111546752	8737	1	Eif5-202	2204	Eif5-202;Eif5-214;Eif5-209;Eif5-204;Eif5-212;Eif5-213;Eif5-207;Eif5-210;Eif5-201;Eif5-203;Eif5-208;Eif5-211;Eif5-215;Eif5-217;Eif5-216;Eif5-205;Eif5-206	Eif5;Eif5;Eif5;Eif5;Eif5;Eif5;Eif5;Eif5;Eif5;Eif5;Eif5;Eif5;Eif5;Eif5;Eif5;Eif5;Eif5	0;0;2004;0;0;0;0;0;0;0;0;0;0;0;0;-1956;-2562	TRUE
24492	cg21299339	0.0000209	0.0000182	1.147054665	0.25224355	gain	ns	0.00014743	0.0000309	4.773777493	0.00000279	pos	ns	0.006246753	0.009047751	0.690420588	0.490446323	pos	ns	0.309408517	0.0000353	0.000311151	0.113565086	0.909656076	pos	ns	0.712834525	Kcna1	Kcna1_Exon	6	126642146	126642195	126642146	126642147	50	+	CGGGCAGGGCAATTGTTAGCACACCAGCGATGGCACACAAGGAGCCCACG	Exon (Kcna1-201/Kcna1, exon 2 of 2)	6	126640397	126644796	4400	2	Kcna1-201	2601	Kcna1-201;Kcna1-202;Kcna1-203	Kcna1;Kcna1;Kcna1	0;0;0	TRUE
6286	cg14004899	0.0000624	0.0000217	2.877269801	0.004289692	gain	ns	-0.000175733	0.0000368	-4.769860929	0.00000284	neg	ns	0.027508612	0.010793561	2.548613273	0.011297096	pos	ns	1.947033175	0.001592788	0.00037119	4.291035444	0.0000238	pos	ns	0.385367804	Nrn1	Nrn1_fiveUTR	13	36730120	36730169	36730168	36730169	50	+	TGATGTTCGTCTTGTCGTCCAGGCCCTGCGGGTAGTTGGCCATGCTGTCG	Promoter (<=1kb)	13	36725361	36730680	5320	2	Nrn1-204	511	Fars2-211;Nrn1-204;Nrn1-201;Nrn1-203;Nrn1-202;Nrn1-205	Fars2;Nrn1;Nrn1;Nrn1;Nrn1;Nrn1	8194;0;0;0;0;0	TRUE
9831	cg15667675	0.0000332	0.0000107	3.112615347	0.002027218	gain	ns	0.0000865	0.0000181	4.768044167	0.00000287	pos	ns	0.026712661	0.005314597	5.026282019	0.000000847	pos	ns	6.072123785	-0.000551996	0.000182769	-3.020191781	0.002736263	neg	ns	0.20499611	Rap2c	Rap2c_Exon	X	51017766	51017815	51017766	51017767	50	+	CGATCTCTTTGCGGTAGAAATCTTCAATGGTGGGGTCATATTTCTCAATG	Promoter (<=1kb)	20	51003912	51018018	14107	2	Rap2c-201	203	Rap2c-201	Rap2c	0	TRUE
14611	cg15903069	0.0000538	0.0000127	4.230011936	0.0000308	gain	ns	0.000102931	0.0000216	4.764739768	0.00000291	pos	ns	0.006224111	0.006328837	0.98345249	0.326151705	pos	ns	0.486580347	0.000367664	0.000217648	1.689258259	0.092175395	pos	ns	0.204286387	Skor2	Skor2_Intergenic_upstream	18	76845758	76845807	76845758	76845759	50	+	CGTAGAGGCAATGTGTTTACCACATTGTAATTGAACTCATTAGGGCTATG	Distal Intergenic	18	76856405	76900342	43938	1	Skor2-201	-10598	NA	NA	NA	FALSE
26487	cg19261871	0.0000115	0.00000692	1.659349508	0.09805666	gain	ns	0.000056	0.0000118	4.763049063	0.00000293	pos	ns	0.003391535	0.0034464	0.984080649	0.325843276	pos	ns	0.486991237	0.0000442	0.000118521	0.372984759	0.709414689	pos	ns	0.830491652	Casz1	Casz1_Intergenic_upstream	4	148778369	148778418	148778417	148778418	50	-	TTTATGATTTGTCCCTCGTTTGATGAGCATCTCTCCCATCAATTGTGCCG	Distal Intergenic	4	148804429	148954889	150461	1	Casz1-202	-26060	NA	NA	NA	FALSE
2178	cg18754842	0.00000419	0.00000563	0.744992902	0.456840436	gain	ns	-0.0000455	0.00000956	-4.759564763	0.00000298	neg	ns	0.004104293	0.002801493	1.465037859	0.143924029	pos	ns	0.841866692	-0.000244784	0.0000963	-2.540753821	0.011548786	neg	ns	0.878152344	Kdm6a	Kdm6a_threeUTR	X	18278742	18278791	18278742	18278743	50	+	CGTAAGGCTGCTGGCTGAAAACTGTGTCTATGCAACCTTCCAAGTGCGGA	3' UTR	20	18162575	18279936	117362	1	Kdm6a-201	116167	Kdm6a-201;Kdm6a-202;Kdm6a-208;Kdm6a-204	Kdm6a;Kdm6a;Kdm6a;Kdm6a	0;0;0;4230	TRUE
22603	cg19369305	-0.000104634	0.0000183	-5.719984987	2.51E-08	loss	yes	0.000147769	0.0000311	4.754970644	0.00000304	pos	ns	0.032825246	0.009104425	3.605416827	0.00036304	pos	ns	3.440045825	-0.00101635	0.0003131	-3.246082267	0.001298065	neg	ns	0.435083133	BC052040	BC052040_Intergenic_upstream	2	115384960	115385009	115384960	115384961	50	-	CGTTTAAGCCAAATCATTTTGGACTGTGAAAAGAGCCCTGAGTGGTGGAT	Distal Intergenic	2	115581716	115778768	197053	1	BC052040-203	-196756	NA	NA	NA	FALSE
5154	cg11868140	0.00000837	0.00000348	2.406499958	0.01669098	gain	ns	-0.0000281	0.00000591	-4.753595366	0.00000306	neg	ns	-0.007332509	0.001730444	-4.237356481	0.0000299	neg	ns	4.524851337	0.000135615	0.0000595	2.27886304	0.023354956	pos	ns	0.898987645	Mfn1	Mfn1_Exon	3	32561460	32561509	32561460	32561461	50	+	CGCAGGAGTGTATCTCGCAGTCAGCAGTGAAAACAAAGTTCGAACAGCAC	Exon (Mfn1-201/Mfn1, exon 10 of 18)	3	32529465	32579239	49775	1	Mfn1-201	31995	Mfn1-201;Mfn1-202;Mfn1-205;Mfn1-209;Mfn1-207;Mfn1-208	Mfn1;Mfn1;Mfn1;Mfn1;Mfn1;Mfn1	0;0;0;0;-37;-1399	TRUE
2013	cg25317453	0.0000532	0.0000118	4.510328231	0.0000092	gain	ns	-0.0000953	0.00002	-4.751960221	0.00000309	neg	ns	-0.014697916	0.005873319	-2.502488986	0.012846985	neg	ns	1.891198773	-0.000880356	0.000201983	-4.358565245	0.0000178	neg	ns	0.388319068	Tes	Tes_Intron	6	17143169	17143218	17143217	17143218	50	-	TAAGGTCACAAGACAGACAGTTCTTTCTTGATTACTCAAACAAATACACG	Intron (Gm4876-204/Gm4876-204, intron 1 of 1)	6	17065224	17105828	40605	1	Tes-201	77994	NA	NA	NA	TRUE
192	cg19721103	0.00013833	0.0000182	7.592793869	3.71E-13	gain	yes	-0.000147049	0.000031	-4.751055342	0.0000031	neg	ns	0.06868581	0.009067568	7.574888042	4.17E-13	pos	yes	12.37977696	-0.001845965	0.000311833	-5.919725938	8.54E-09	neg	yes	0.547715325	Ascc2	Ascc2_Exon	11	4646604	4646653	4646652	4646653	50	-	CCGCCCCCTAAAGACAACATTCCCGCCCTAGTGGAGGAGTACCTGGAACG	Exon (Ascc2-201/Ascc2, exon 3 of 20)	11	4637747	4683385	45639	1	Ascc2-201	8857	Ascc2-201;Ascc2-202	Ascc2;Ascc2	0;0	TRUE
13470	cg02353150	0.00000386	0.00000243	1.590235981	0.112800876	gain	ns	-0.0000196	0.00000412	-4.748461299	0.00000314	neg	ns	-0.002230221	0.001207988	-1.846227111	0.0658124	neg	ns	1.181692269	-0.0000324	0.0000415	-0.779612055	0.43621404	neg	ns	0.934414612	Xpo7	Xpo7_Intron	14	70683986	70684035	70684034	70684035	50	+	CTGGGGCACTCCAGGGCTGATTTCTGCAGCAAGGGTAAGAGATTTCTGCG	Intron (Xpo7-202/Xpo7, intron 15 of 27)	14	70654246	70766628	112383	2	Xpo7-202	82593	Xpo7-202;Xpo7-201;Xpo7-206;Xpo7-203;Xpo7-204;Xpo7-205	Xpo7;Xpo7;Xpo7;Xpo7;Xpo7;Xpo7	0;0;0;0;0;0	TRUE
20811	cg19101845	-0.000110318	0.0000186	-5.941882131	7.57E-09	loss	yes	0.000149737	0.0000315	4.747314032	0.00000315	pos	ns	-0.011147551	0.009240554	-1.206372626	0.228593684	neg	ns	0.640935773	0.000593157	0.000317782	1.866553597	0.062907917	pos	ns	0.522758142	Kcnd3	Kcnd3_Promoter	3	105449867	105449916	105449867	105449868	50	-	CGACAAGCTCCCAAATTAGCTTTTTAAATAGAAGCTGAGAGTTAAAGGAA	Promoter (2-3kb)	3	105452330	105674002	221673	1	Kcnd3-202	-2463	Kcnd3-202;Kcnd3-204;Kcnd3-203	Kcnd3;Kcnd3;Kcnd3	0;0;0	TRUE
5787	cg13304807	0.0000386	0.00000667	5.787520327	1.75E-08	gain	yes	-0.0000537	0.0000113	-4.740456571	0.00000326	neg	ns	0.037007211	0.003319944	11.14693855	1.72E-24	pos	yes	23.76504882	-0.001535952	0.000114173	-13.45289138	8.25E-33	neg	yes	0.868990052	Cald1	Cald1_threeUTR	6	34771078	34771127	34771078	34771079	50	+	CGGAACCTCTGGGAAAAGCAATCTGTGGATAAGGTCACTTCCCCCACTAA	3' UTR	6	34598500	34775454	176955	1	Cald1-202	172578	Cald1-202;Cald1-205;Cald1-204;Cald1-203;Cald1-214;Cald1-201;Cald1-218;Cald1-209	Cald1;Cald1;Cald1;Cald1;Cald1;Cald1;Cald1;Cald1	0;0;0;0;0;0;8218;6122	TRUE
840	cg20096021	-0.0000213	0.000016	-1.333337706	0.183399942	loss	ns	0.000128789	0.0000272	4.739660903	0.00000327	pos	ns	0.019115625	0.007960645	2.401265845	0.016927114	pos	ns	1.771417084	-0.000314605	0.000273766	-1.14917535	0.251369543	neg	ns	0.309980407	Nxph1	Nxph1_Exon	6	8952269	8952318	8952317	8952318	50	+	GGAGCATTTGAAAACCATTCAGTGTGCAAATTATGCTGATTCAATTACCG	Exon (Nxph1-203/Nxph1, exon 3 of 3)	6	8948431	8952430	4000	1	Nxph1-203	3838	Nxph1-203;Nxph1-202;Nxph1-201	Nxph1;Nxph1;Nxph1	0;0;0	TRUE
26957	cg11134207	0.0000521	0.00000498	10.47215427	3.59E-22	gain	yes	-0.0000401	0.00000846	-4.738592314	0.00000328	neg	ns	0.013350646	0.002478296	5.387027011	0.000000142	pos	ns	6.847979072	-0.000567151	0.0000852	-6.654485264	1.29E-10	neg	yes	0.789316486	Acss2	Acss2_threeUTR	2	155561766	155561815	155561814	155561815	50	-	ATTGCCACACCAGACTACATCCAGAATGCACCTGGCTTGCCTAAAACCCG	3' UTR	2	155517948	155562746	44799	1	Acss2-201	43818	Acss2-201;Acss2-202;Acss2-203;Acss2-205;Acss2-209;Gss-201;Gss-203;Gss-208;Gss-205	Acss2;Acss2;Acss2;Acss2;Acss2;Gss;Gss;Gss;Gss	0;0;0;0;12534;30995;30899;11189;12568	TRUE
17395	cg11129543	-0.0000373	0.00000401	-9.31716624	2.30E-18	loss	yes	-0.0000323	0.00000681	-4.736513488	0.00000331	neg	ns	-0.001974654	0.001995104	-0.98975027	0.323068088	neg	ns	0.490705939	-0.00000775	0.0000686	-0.112923945	0.910163943	neg	ns	0.86173509	Ubap2l	Ubap2l_Exon	3	90038805	90038854	90038853	90038854	50	-	CATTACTGACCCACAGCTGGTTTTGATAAAGCCCCATGCATACACTCTCG	Exon (Ubap2l-215/Ubap2l, exon 5 of 27)	3	90000140	90052455	52316	2	Ubap2l-215	13601	Ubap2l-215;Ubap2l-201;Ubap2l-202;Ubap2l-208;Ubap2l-203;Ubap2l-204;Ubap2l-220;Ubap2l-205;Ubap2l-216;Ubap2l-206;Ubap2l-214;Ubap2l-213;Ubap2l-221	Ubap2l;Ubap2l;Ubap2l;Ubap2l;Ubap2l;Ubap2l;Ubap2l;Ubap2l;Ubap2l;Ubap2l;Ubap2l;Ubap2l;Ubap2l	0;0;0;0;0;0;0;0;0;0;0;0;0	TRUE
14911	cg04398268	-0.0000675	0.00000978	-6.896322411	3.00E-11	loss	yes	-0.0000787	0.0000166	-4.735632744	0.00000333	neg	ns	0.029835631	0.004868537	6.128253793	2.70E-09	pos	ns	8.569415942	-0.001462645	0.000167429	-8.73593373	1.54E-16	neg	yes	0.836824829	Fam222b	Fam222b_fiveUTR	11	78153930	78153979	78153978	78153979	50	+	AAAGTGCCAGCCAAAAGCATACTCAAGGACTTTGACGGCACCCGAGCCCG	5' UTR	11	78094660	78156700	62041	1	Fam222b-201	59270	Fam222b-201;Fam222b-202;Fam222b-203;Gm12571-201;Traf4-203	Fam222b;Fam222b;Fam222b;Gm12571;Traf4	0;0;0;-4492;11610	TRUE
664	cg15958715	0.0000672	0.0000078	8.626636174	3.34E-16	gain	yes	0.0000627	0.0000132	4.733788138	0.00000336	pos	ns	0.022079996	0.003879926	5.690829841	2.93E-08	pos	ns	7.533272121	-0.00049018	0.00013343	-3.6736749	0.000281573	neg	ns	0.476509831	Ppp1r3f	Ppp1r3f_Exon	X	7573420	7573469	7573468	7573469	50	-	CGTGGTTGTTGGCCCAGAAAGTGCCCTCAGGGGTCTCATAGCGCACCACG	Promoter (<=1kb)	20	7557296	7574283	16988	2	Ppp1r3f-205	814	Foxp3-209;Ppp1r3f-205;Ppp1r3f-201;Ppp1r3f-203	Foxp3;Ppp1r3f;Ppp1r3f;Ppp1r3f	-175;0;0;-577	TRUE
499	cg25409637	0.0000766	0.0000101	7.569540074	4.32E-13	gain	yes	-0.0000814	0.0000172	-4.733583621	0.00000336	neg	ns	0.015029445	0.005037956	2.983242609	0.003078631	pos	ns	2.511642349	-0.00039943	0.000173255	-2.305450044	0.021801369	neg	ns	0.604538987	Celf2	Celf2_Exon	2	6604116	6604165	6604164	6604165	50	+	GGAGGCGCCTTTGCTCTTTGTCCTTCTGAGTGTCAGCAAACTTCACCACG	Exon (Celf2-201/Celf2, exon 9 of 16)	2	6539694	7396000	856307	2	Celf2-201	791835	Celf2-201;Celf2-202;Celf2-204;Celf2-214;Celf2-206;Celf2-226;Celf2-223;Celf2-224;Celf2-221;Celf2-205;Celf2-211;Celf2-213;Celf2-225;Celf2-228;Celf2-217;Celf2-227;Celf2-212;Celf2-210	Celf2;Celf2;Celf2;Celf2;Celf2;Celf2;Celf2;Celf2;Celf2;Celf2;Celf2;Celf2;Celf2;Celf2;Celf2;Celf2;Celf2;Celf2	0;0;0;0;0;0;0;0;0;0;0;0;0;0;0;0;0;0	TRUE
2636	cg25824158	-0.000309233	0.0000252	-12.28795612	1.53E-28	loss	yes	-0.000202148	0.0000428	-4.728293753	0.00000344	neg	ns	0.082806579	0.012525145	6.611227266	1.67E-10	pos	yes	9.778375864	-0.003486484	0.000430739	-8.094197428	1.33E-14	neg	yes	0.762049583	Camk2g	Camk2g_Exon	14	20757705	20757754	20757705	20757706	50	-	CGGGGGCGGAGCTCTGCCTGCCAACTGAGGGGATACAGTCTCTCAGTGCA	Exon (Camk2g-209/Camk2g, exon 4 of 11)	14	20734875	20794051	59177	2	Camk2g-203	36297	Camk2g-203;Camk2g-201;Camk2g-202;Camk2g-217;Camk2g-209;Camk2g-204;Camk2g-212;Camk2g-211;Camk2g-214;Camk2g-216;Camk2g-206	Camk2g;Camk2g;Camk2g;Camk2g;Camk2g;Camk2g;Camk2g;Camk2g;Camk2g;Camk2g;Camk2g	0;0;0;0;0;0;0;0;0;0;7755	TRUE
25332	cg25194481	0.0000386	0.00000388	9.953778086	1.95E-20	gain	yes	-0.0000311	0.00000659	-4.726012393	0.00000348	neg	ns	-0.00400661	0.001930331	-2.075607692	0.03875445	neg	ns	1.411678421	0.000105105	0.0000664	1.58329496	0.114373872	pos	ns	0.909377233	Srrm1	Srrm1_Exon	4	135342541	135342590	135342541	135342542	50	+	CGTCTTCTAGGGGAAGGAGATCTGGATTTGCGTCTAGGATGAAAGTAATT	Exon (Srrm1-203/Srrm1, exon 6 of 17)	4	135320484	135353321	32838	2	Srrm1-203	10731	Srrm1-203;Srrm1-202;Srrm1-208;Srrm1-201;Srrm1-212;Srrm1-213;Srrm1-204;Srrm1-214;Srrm1-205;Srrm1-207;Srrm1-209;Srrm1-206	Srrm1;Srrm1;Srrm1;Srrm1;Srrm1;Srrm1;Srrm1;Srrm1;Srrm1;Srrm1;Srrm1;Srrm1	0;0;0;0;0;-4468;0;0;0;0;0;0	TRUE
26464	cg12027384	0.0000104	0.00000276	3.756522119	0.000205781	gain	ns	-0.0000221	0.00000468	-4.72437875	0.0000035	neg	ns	-0.006937076	0.001372521	-5.054258185	0.00000074	neg	ns	6.130792404	0.0000924	0.0000472	1.958188332	0.051104516	pos	ns	0.887220099	Mtor	Mtor_Exon	4	148538823	148538872	148538823	148538824	50	+	CGTGAAAGGCATGTTTGAGGTGCTGGAGCCCTTGCATGCTATGATGGAAC	Exon (Mtor-202/Mtor, exon 44 of 58)	4	148448611	148557683	109073	1	Mtor-202	90212	Mtor-202	Mtor	0	TRUE
9732	cg06937549	0.0000847	0.0000166	5.111440436	0.00000056	gain	yes	-0.000132987	0.0000282	-4.723300085	0.00000352	neg	ns	0.022321722	0.008248638	2.7061101	0.007184578	pos	ns	2.143598726	-0.000333008	0.00028367	-1.173928529	0.241324733	neg	ns	0.400920323	Hnrnph1	Hnrnph1_Exon	11	50381516	50381565	50381516	50381517	50	+	CGGGGGAGGCCTTCGTGCAGTTTGCTTCACAGGAAATAGCTGAAAAGGCT	Exon (Hnrnph1-203/Hnrnph1, exon 6 of 15)	11	50376990	50386528	9539	1	Hnrnph1-203	4526	Hnrnph1-203;Hnrnph1-201;Hnrnph1-205;Hnrnph1-206;Hnrnph1-215;Hnrnph1-204;Hnrnph1-202;Hnrnph1-207;Hnrnph1-208;Hnrnph1-210;Hnrnph1-211;Hnrnph1-213;Hnrnph1-209;Hnrnph1-218;Hnrnph1-216;Hnrnph1-214;Hnrnph1-212;Hnrnph1-217	Hnrnph1;Hnrnph1;Hnrnph1;Hnrnph1;Hnrnph1;Hnrnph1;Hnrnph1;Hnrnph1;Hnrnph1;Hnrnph1;Hnrnph1;Hnrnph1;Hnrnph1;Hnrnph1;Hnrnph1;Hnrnph1;Hnrnph1;Hnrnph1	0;0;0;0;0;0;0;0;0;0;0;0;0;0;0;-2247;-2266;-3398	TRUE
18288	cg10397346	0.000163455	0.0000174	9.397803358	1.27E-18	gain	yes	-0.000139434	0.0000295	-4.718881651	0.00000359	neg	ns	0.054762921	0.008656604	6.326143653	8.78E-10	pos	ns	9.056719338	-0.001636372	0.0002977	-5.496715124	8.09E-08	neg	yes	0.748641807	Dyrk1a	Dyrk1a_Exon	16	94692018	94692067	94692018	94692019	50	-	CGTCTACTCCAATCCCCGCCAAGAGACTGGCATAGCTGGACATCCAACAT	Exon (Dyrk1a-202/Dyrk1a, exon 12 of 12)	16	94570010	94695067	125058	1	Dyrk1a-202	122008	Dyrk1a-202;Dyrk1a-203;Dyrk1a-201	Dyrk1a;Dyrk1a;Dyrk1a	0;0;0	TRUE
8882	cg13653679	0.000142369	0.0000214	6.661062956	1.24E-10	gain	yes	-0.000171182	0.0000363	-4.714405639	0.00000367	neg	ns	0.01377784	0.010637728	1.295186248	0.196219697	pos	ns	0.7072574	-0.001283216	0.000365831	-3.507677548	0.00051889	neg	ns	0.561912321	Gm15217	Gm15217_Intergenic_upstream	14	46240591	46240640	46240591	46240592	50	+	CGGTGCTGAGCAGTGATTTTCCATATCTGACTGCCTTTGTGTTCACCCCA	Distal Intergenic	14	46379414	46383418	4005	1	Gm15217-202	-138774	NA	NA	NA	FALSE
24916	cg07260343	0.0000251	0.00000551	4.544211783	0.00000791	gain	ns	-0.0000441	0.00000937	-4.713543345	0.00000368	neg	ns	0.0076964	0.0027438	2.805015362	0.005349223	pos	ns	2.271709322	-0.000325602	0.0000944	-3.450666021	0.000636753	neg	ns	0.834452262	Wdr11	Wdr11_Exon	7	129606591	129606640	129606591	129606592	50	+	CGTCCCTTCAGTATGGTGTGCTGTCCTGTCAATGAGAATGCAGCCGCCCT	Exon (Wdr11-201/Wdr11, exon 8 of 29)	7	129591863	129635738	43876	1	Wdr11-201	14728	Wdr11-201;Wdr11-205;Wdr11-203;Wdr11-207;Wdr11-206;Wdr11-208;Wdr11-209	Wdr11;Wdr11;Wdr11;Wdr11;Wdr11;Wdr11;Wdr11	0;0;0;0;0;0;-1167	TRUE
23069	cg08113048	-0.0000494	0.00000885	-5.585205292	5.11E-08	loss	yes	-0.0000708	0.000015	-4.712355665	0.0000037	neg	ns	0.012456306	0.004402639	2.829281477	0.004969461	pos	ns	2.303690711	-0.00112058	0.000151406	-7.401137482	1.28E-12	neg	yes	0.774209551	Rnf220	Rnf220_Exon	4	117272654	117272703	117272654	117272655	50	-	CGGCCTTTGATCAGGACACAGAGCCCACGTCCGAGCCTTTTATTACTGTC	Exon (Rnf220-211/Rnf220, exon 2 of 2)	4	117271463	117497052	225590	2	Rnf220-201	224349	Rnf220-201;Rnf220-203;Rnf220-212;Rnf220-202;Rnf220-205;Rnf220-214;Rnf220-211;Rnf220-209;Tmem53-201;Tmem53-204;Tmem53-203;Tmem53-206;Tmem53-202;Tmem53-205	Rnf220;Rnf220;Rnf220;Rnf220;Rnf220;Rnf220;Rnf220;Rnf220;Tmem53;Tmem53;Tmem53;Tmem53;Tmem53;Tmem53	0;0;0;0;0;0;0;0;20703;20614;20612;20592;20314;7283	TRUE
11404	cg26828243	0.0000239	0.0000111	2.165979072	0.031074811	gain	ns	0.0000884	0.0000188	4.709537446	0.00000375	pos	ns	0.018696529	0.005500404	3.39911938	0.000764427	pos	ns	3.11666412	-0.000350289	0.000189158	-1.851829107	0.065001046	neg	ns	0.342056974	Zic3	Zic3_fiveUTR	X	58030606	58030655	58030606	58030607	50	+	CGAGGAGTGAGTGATTGACTTTATCAGTCCAAGGACATTACTCTGGAGGC	Promoter (<=1kb)	20	58030643	58036559	5917	1	Zic3-201	0	Zic3-204;Zic3-201;Zic3-203;Zic3-202	Zic3;Zic3;Zic3;Zic3	0;0;0;0	TRUE
17495	cg02610586	0.00000376	0.00000509	0.738178605	0.460964367	gain	ns	0.0000407	0.00000865	4.7069439	0.0000038	pos	ns	0.007387314	0.002533848	2.915452512	0.003810589	pos	ns	2.419007862	-0.000118138	0.0000871	-1.355742672	0.17616787	neg	ns	0.908667484	Chtop	Chtop_Exon	3	90503239	90503288	90503239	90503240	50	-	CGTGCCTGGATGTTACTCTTACCCAGGCGCTGCTTTAAGCTCTTCTGGAA	Exon (Chtop-205/Chtop, exon 3 of 4)	3	90498956	90509450	10495	2	Chtop-205	6162	Chtop-205;Chtop-201;Chtop-206;Chtop-203;Chtop-202;Chtop-207;Chtop-204;Chtop-209;Chtop-208	Chtop;Chtop;Chtop;Chtop;Chtop;Chtop;Chtop;Chtop;Chtop	0;0;0;0;0;0;0;0;0	TRUE
8957	cg24661451	-0.00000271	0.00000222	-1.219836054	0.223454241	loss	ns	0.0000178	0.00000377	4.705299476	0.00000382	pos	ns	0.002819476	0.001105649	2.550063752	0.011251185	pos	ns	1.948801736	-0.0000164	0.000038	-0.430341788	0.667246055	neg	ns	0.953269395	Kcnc1	Kcnc1_Exon	7	46428159	46428208	46428159	46428160	50	-	CGGCCACCGCAGCTGGGATCTCCCAATTATTGTAAATCTGTCGTAAACTC	Exon (Kcnc1-201/Kcnc1, exon 2 of 2)	7	46396497	46433354	36858	1	Kcnc1-201	31662	Kcnc1-201;Kcnc1-203;Kcnc1-202	Kcnc1;Kcnc1;Kcnc1	0;0;0	TRUE
293	cg23697154	0.0000799	0.00000532	15.01887708	1.09E-38	gain	yes	-0.0000425	0.00000904	-4.701625545	0.00000389	neg	ns	-0.008487157	0.002648196	-3.204882481	0.001491943	neg	ns	2.826247635	0.000307158	0.0000911	3.372723156	0.000838698	pos	ns	0.87969616	Syne1	Syne1_Exon	10	5030382	5030431	5030430	5030431	50	-	TGTGGACTGCTGACAGAGGGTCCAGGCTGTGAGAGACTACACTTGCCTCG	Exon (Syne1-205/Syne1, exon 145 of 146)	10	5020917	5550678	529762	2	Syne1-205	520247	Syne1-205;Syne1-202	Syne1;Syne1	0;0	TRUE
22389	cg11338714	-0.000000183	0.00000194	-0.09396063	0.925201131	loss	ns	-0.0000155	0.0000033	-4.70064057	0.00000391	neg	ns	0.004235964	0.000967885	4.376516806	0.0000165	pos	ns	4.782479115	-0.00016909	0.0000333	-5.079999679	0.000000653	neg	yes	0.955643973	Ubp1	Ubp1_Exon	9	113959436	113959485	113959436	113959437	50	+	CGGACTTTGCCAGCAGACTACGGTGATTCTCTGGCAAAGCGAGGCAGTGT	Exon (Ubp1-202/Ubp1, exon 9 of 17)	9	113930934	113977199	46266	1	Ubp1-201	28502	Fbxl2-202;Ubp1-201;Ubp1-202;Ubp1-204;Ubp1-203;Ubp1-207;Ubp1-206	Fbxl2;Ubp1;Ubp1;Ubp1;Ubp1;Ubp1;Ubp1	67244;0;0;0;0;0;0	TRUE
10040	cg05606175	0.0000893	0.0000202	4.422249083	0.0000135	gain	ns	-0.00016122	0.0000343	-4.69820165	0.00000395	neg	ns	0.064906008	0.010053208	6.456248688	4.14E-10	pos	ns	9.383225432	-0.001726018	0.000345729	-4.992400555	0.000000997	neg	yes	0.407327564	Hnrnpc	Hnrnpc_fiveUTR	14	52098533	52098582	52098533	52098534	50	+	CGCCTTGCTGCCCTGTGAAAGGAGAAGGGACAGATTGAGTCAGAGTTCCT	5' UTR	14	52073377	52104028	30652	2	Hnrnpc-201	5446	Hnrnpc-201;Hnrnpc-202;Hnrnpc-205;Hnrnpc-209;Hnrnpc-211;Hnrnpc-206;Hnrnpc-207;Hnrnpc-210;Hnrnpc-204;Hnrnpc-208;Hnrnpc-203;Hnrnpc-213;Hnrnpc-212	Hnrnpc;Hnrnpc;Hnrnpc;Hnrnpc;Hnrnpc;Hnrnpc;Hnrnpc;Hnrnpc;Hnrnpc;Hnrnpc;Hnrnpc;Hnrnpc;Hnrnpc	0;0;0;0;0;0;0;0;0;0;0;0;0	TRUE
21966	cg15340018	0.00000867	0.00000373	2.324451868	0.020747119	gain	ns	-0.0000297	0.00000633	-4.689313398	0.00000411	neg	ns	-0.0000805	0.001855562	-0.04339192	0.965417054	neg	ns	0.015285034	0.00000467	0.0000638	0.073239748	0.94166257	pos	ns	0.89333402	Ap1g1	Ap1g1_Exon	8	109843354	109843403	109843354	109843355	50	-	CGTGCAATGGAATTGAGTTTTGCCCTGGTAAATGGGAATAATATCCGAGG	Exon (Ap1g1-202/Ap1g1, exon 13 of 24)	8	109778554	109864204	85651	1	Ap1g1-202	64800	Ap1g1-202;Ap1g1-201;Ap1g1-203	Ap1g1;Ap1g1;Ap1g1	0;0;0	TRUE
15937	cg25776150	-0.000000297	0.0000132	-0.02248624	0.982074555	loss	ns	0.000105078	0.0000224	4.688035727	0.00000414	pos	ns	0.022681541	0.006566579	3.454087944	0.000629025	pos	ns	3.20133188	-0.000461448	0.000225824	-2.043395046	0.041858505	neg	ns	0.471965475	Dmd	Dmd_Exon	X	83928749	83928798	83928749	83928750	50	-	CGGTTGATGTGGTTAGCTAACTGCCCTGGGCCCTGTATTGGTTTTGCTCA	Exon (Dmd-209/Dmd, exon 2 of 2)	20	82948903	85206141	2257239	1	Dmd-203	979846	Dmd-203;Dmd-215;Dmd-209	Dmd;Dmd;Dmd	0;0;0	TRUE
5982	cg01382164	-0.0000174	0.0000126	-1.377566805	0.169330782	loss	ns	-0.000100572	0.0000215	-4.685441722	0.00000419	neg	ns	-0.004588482	0.006288442	-0.729669125	0.466143435	neg	ns	0.331480428	-0.00055605	0.000216259	-2.571224253	0.01060008	neg	ns	0.713093067	Ddr1	Ddr1_Exon	17	35686476	35686525	35686524	35686525	50	+	CTTACCCTGGGTGTTGGTGGGTTTGGCCCAGGCGGGTGTGGGGGGGCCCG	Exon (Ddr1-204/Ddr1, exon 12 of 18)	17	35681567	35700610	19044	2	Ddr1-204	14085	Ddr1-204;Ddr1-203;Ddr1-212;Ddr1-202;Ddr1-201;Ddr1-211;Ddr1-210;Ddr1-209;Ddr1-205;Ddr1-208;Ddr1-207	Ddr1;Ddr1;Ddr1;Ddr1;Ddr1;Ddr1;Ddr1;Ddr1;Ddr1;Ddr1;Ddr1	0;0;0;0;0;0;0;17452;18096;11446;15521	TRUE
3222	cg08201223	0.000315368	0.0000131	24.06225049	6.76E-73	gain	yes	-0.000104291	0.0000223	-4.683869649	0.00000422	neg	ns	0.019765786	0.006523166	3.030090647	0.002650673	pos	ns	2.576643821	-0.000121197	0.000224331	-0.540259661	0.589405889	neg	ns	0.274652912	Cadps2	Cadps2_Intron	6	23272823	23272872	23272823	23272824	50	-	CGGAAAACAGAACATCAGTCTAATCTAGTGTTTAAGGTGAGGTTTTCAAA	Intron (Cadps2-213/Cadps2, intron 28 of 29)	6	23262773	23839137	576365	2	Cadps2-213	566265	Cadps2-213;Cadps2-205;Cadps2-212;Cadps2-201;Cadps2-209;Cadps2-206;Cadps2-211;Cadps2-207;Cadps2-202;Cadps2-210	Cadps2;Cadps2;Cadps2;Cadps2;Cadps2;Cadps2;Cadps2;Cadps2;Cadps2;Cadps2	0;0;0;0;0;0;0;0;0;0	TRUE
11159	cg26769410	-0.0000233	0.0000143	-1.629978979	0.104121555	loss	ns	0.000113487	0.0000242	4.682492617	0.00000424	pos	ns	0.01648186	0.007100479	2.321232	0.020922557	pos	ns	1.679385245	-0.000241353	0.000244185	-0.988404274	0.323725525	neg	ns	0.429556849	Fhl1	Fhl1_Exon	X	56791389	56791438	56791437	56791438	50	-	TGGTGGTTCTTTATAGAAAAAATCGAAGCTTAGCAGCTCCTCGAGGCCCG	Exon (Fhl1-203/Fhl1, exon 7 of 8)	20	56731787	56793346	61560	1	Fhl1-201	59602	Fhl1-201;Fhl1-203;Fhl1-206;Fhl1-205;Fhl1-204;Fhl1-202;Fhl1-210;Fhl1-207;Fhl1-208;Fhl1-209	Fhl1;Fhl1;Fhl1;Fhl1;Fhl1;Fhl1;Fhl1;Fhl1;Fhl1;Fhl1	0;0;0;0;0;0;11570;0;3664;3391	TRUE
4458	cg10329153	-0.0000231	0.0000108	-2.131473635	0.033836419	loss	ns	0.000086	0.0000184	4.677939353	0.00000433	pos	ns	0.011911893	0.005387895	2.210862254	0.027775123	pos	ns	1.556344012	0.000393978	0.000185289	2.12628874	0.034269096	pos	ns	0.250552239	Sox4	Sox4_threeUTR	13	28949492	28949541	28949492	28949493	50	+	CGGCATTTAGATAGATCCAGTGGTTTAAACGGCACGTTTTTGCTTATAAA	3' UTR	13	28948919	28953713	4795	2	Sox4-201	4172	Sox4-201	Sox4	0	TRUE
733	cg26237121	0.000101066	0.0000132	7.657389832	2.44E-13	gain	yes	-0.000104839	0.0000224	-4.675605057	0.00000438	neg	ns	0.056157039	0.006569035	8.548750736	5.77E-16	pos	yes	15.23907256	-0.000756802	0.000225909	-3.350034988	0.000907856	neg	ns	0.824133625	Nipbl	Nipbl_Exon	15	8351675	8351724	8351723	8351724	50	-	ATCAATGCTAACCATTAATGCTGGCCTTGACCCATTTCCCGTAGAACCCG	Exon (Nipbl-201/Nipbl, exon 10 of 47)	15	8290617	8444463	153847	2	Nipbl-201	92739	Nipbl-201	Nipbl	0	TRUE
19456	cg25861579	0.00000865	0.0000172	0.503640554	0.614871689	gain	ns	0.000136425	0.0000292	4.673398037	0.00000442	pos	ns	-0.000464401	0.008552245	-0.054301689	0.956729782	neg	ns	0.019210707	0.000437282	0.000294111	1.48679157	0.13808622	pos	ns	0.667876092	Gm12689	Gm12689_Intergenic_downstream	4	99355403	99355452	99355451	99355452	50	+	CCTTGTCCCCTGTTATTGCGGTCACTTGACCTCAGATGTAACTTCTGTCG	Distal Intergenic	4	99295900	99297258	1359	1	Gm12689-201	59503	NA	NA	NA	FALSE
22042	cg25217583	-0.0000436	0.0000148	-2.954627778	0.003370273	loss	ns	0.000117127	0.0000251	4.673205342	0.00000443	pos	ns	0.003979938	0.007342764	0.542021746	0.588192909	pos	ns	0.230480216	-0.000052	0.000252517	-0.205784207	0.83709455	neg	ns	0.393372011	Elavl4	Elavl4_Intron	4	110287687	110287736	110287735	110287736	50	-	ACAGAGACCAGATTTCTGAACTGCTTCTTGTGTCTGGTAATTAAGGCCCG	Intron (Elavl4-205/Elavl4, intron 1 of 6)	4	110203737	110290272	86536	2	Elavl4-205	2536	Elavl4-204;Elavl4-201;Elavl4-203;Elavl4-202;Elavl4-205;Elavl4-206;Elavl4-207;Elavl4-208;Elavl4-212;Elavl4-209	Elavl4;Elavl4;Elavl4;Elavl4;Elavl4;Elavl4;Elavl4;Elavl4;Elavl4;Elavl4	0;0;0;0;0;0;0;0;0;0	TRUE
14962	cg12811653	0.00000631	0.00000595	1.059943723	0.289995339	gain	ns	-0.0000472	0.0000101	-4.67081118	0.00000448	neg	ns	-0.00516554	0.002963487	-1.743061167	0.082314428	neg	ns	1.084524034	-0.000111862	0.000101914	-1.097615666	0.273224174	neg	ns	0.832928286	Supt6	Supt6_Exon	11	78208961	78209010	78209009	78209010	50	-	GCACTGAACATCTGTGAAGTCATGTTCTGAGGCAGGGCATTCACAGCCCG	Exon (Supt6-201/Supt6, exon 35 of 37)	11	78206746	78245987	39242	2	Supt6-201	36977	Proca1-202;Proca1-205;Proca1-201;Proca1-203;Proca1-204;Supt6-201;Supt6-202	Proca1;Proca1;Proca1;Proca1;Proca1;Supt6;Supt6	15569;14896;14257;14227;14215;0;0	TRUE
7274	cg10527498	0.0000026	0.00000282	0.922736636	0.356862077	gain	ns	-0.0000224	0.00000479	-4.668746177	0.00000452	neg	ns	-0.001102773	0.00140338	-0.785797492	0.432586331	neg	ns	0.363927207	-0.0000222	0.0000483	-0.459213037	0.646403023	neg	ns	0.919421672	Zdhhc16	Zdhhc16_threeUTR	19	41938788	41938837	41938836	41938837	50	+	CCTGTGTCCCTTCCTCACAGGTGTGTGCTGAAGATGGATCACCACTGCCG	3' UTR	19	41933490	41944104	10615	1	Zdhhc16-201	5298	Mms19-209;Mms19-217;Zdhhc16-206;Zdhhc16-201;Zdhhc16-209;Zdhhc16-208;Zdhhc16-211;Zdhhc16-207;Zdhhc16-204;Zdhhc16-210;Zdhhc16-203;Zdhhc16-202;Zdhhc16-205	Mms19;Mms19;Zdhhc16;Zdhhc16;Zdhhc16;Zdhhc16;Zdhhc16;Zdhhc16;Zdhhc16;Zdhhc16;Zdhhc16;Zdhhc16;Zdhhc16	42277;42320;5308;0;5266;0;0;0;0;0;-1167;-2533;-2782	TRUE
12576	cg21147196	0.000139506	0.0000179	7.787483299	1.03E-13	gain	yes	-0.000142034	0.0000304	-4.667008609	0.00000455	neg	ns	0.039965501	0.008916018	4.482438325	0.0000104	pos	ns	4.983022177	-0.001714134	0.000306621	-5.590399225	4.97E-08	neg	yes	0.656698484	Clpx	Clpx_Exon	9	65318742	65318791	65318742	65318743	50	-	CGTTCAGCAAGTAAGCAGTTGAGTATTTTGTTCAAGCCCACTAAAAGGAA	Exon (Clpx-201/Clpx, exon 9 of 14)	9	65294260	65330657	36398	1	Clpx-201	24482	Clpx-201;Clpx-202;Clpx-203	Clpx;Clpx;Clpx	0;0;8590	TRUE
18265	cg23114440	0.0000194	0.0000123	1.573561364	0.116608893	gain	ns	0.0000975	0.0000209	4.665607311	0.00000458	pos	ns	0.02065964	0.006124986	3.373010135	0.000837856	pos	ns	3.076830717	-0.000365791	0.000210638	-1.736585702	0.083453731	neg	ns	0.548346792	Ap3b1	Ap3b1_Intergenic_downstream	13	94645521	94645570	94645569	94645570	50	-	TGTTTCGCTTCAGCTCTGCCCCTGCAACAGAGGATCTAATCAATCTGCCG	Distal Intergenic	13	94542303	94547867	5565	1	Ap3b1-202	103267	NA	NA	NA	FALSE
1102	cg12887144	0.000139062	0.0000134	10.34356873	9.75E-22	gain	yes	-0.000106534	0.0000228	-4.66431716	0.00000461	neg	ns	-0.004788622	0.006691386	-0.71563977	0.474752482	neg	ns	0.323532756	0.00000248	0.000230116	0.010788187	0.991399378	pos	ns	0.700831357	Rad54b	Rad54b_Intron	4	11579567	11579616	11579615	11579616	50	-	CTGCGTCAGCTTAAGCTGGAGGAATTTTAATAAACCCTCCCCTGTAGGCG	Intron (Rad54b-206/Rad54b, intron 3 of 4)	4	11558922	11593653	34732	1	Rad54b-206	20645	Fsbp-201;Rad54b-206;Rad54b-202;Rad54b-203;Rad54b-201;Rad54b-207	Fsbp;Rad54b;Rad54b;Rad54b;Rad54b;Rad54b	0;0;0;20618;0;0	TRUE
18883	cg22179638	0.0000134	0.0000126	1.065690417	0.287392911	gain	ns	0.0000996	0.0000214	4.659883987	0.0000047	pos	ns	0.018160397	0.006261117	2.900504437	0.003992011	pos	ns	2.398808322	-0.0000503	0.000215319	-0.233649192	0.815411551	neg	ns	0.682678276	Rps18-ps6	Rps18-ps6_Intron	13	97824452	97824501	97824500	97824501	50	+	AAATTAACTGCCTCTTGCCATTATCTGCTCCCTGAGGACCAATCAGAGCG	Intron (Gm41031-201/Gm41031-201, intron 1 of 2)	13	97760072	97760632	561	2	Rps18-ps6-201	-63820	NA	NA	NA	TRUE
20577	cg20432508	0.0000194	0.0000044	4.414418035	0.000014	gain	ns	-0.0000348	0.00000747	-4.655778896	0.00000479	neg	ns	0.005264305	0.002187601	2.406428774	0.016694172	pos	ns	1.77743512	-0.000138985	0.0000752	-1.847429887	0.065637495	neg	ns	0.89451207	Srek1	Srek1_Exon	13	103760485	103760534	103760533	103760534	50	+	AATTCCACAAAAGCAAACCGAGTTGGCTGAGTCTCATCACCTGCCATCCG	Exon (Srek1-204/Srek1, exon 3 of 10)	13	103739348	103764582	25235	2	Srek1-204	4048	Srek1-204;Srek1-201;Srek1-210;Srek1-205;Srek1-209;Srek1-206;Srek1-202	Srek1;Srek1;Srek1;Srek1;Srek1;Srek1;Srek1	0;0;0;0;0;0;0	TRUE
11484	cg08293311	-0.0000068	0.00000534	-1.27507866	0.203236186	loss	ns	-0.0000422	0.00000907	-4.654484052	0.00000482	neg	ns	0.007704169	0.002655968	2.900700777	0.003989577	pos	ns	2.399073108	-0.000303725	0.0000913	-3.325263576	0.000989408	neg	ns	0.892716107	Acvr1	Acvr1_Exon	2	58479684	58479733	58479684	58479685	50	+	CGTGATGTTCCTGTTACACCAGTCCCCTTGGCAGCACTCCACGGCTTGGC	Exon (Acvr1-206/Acvr1, exon 3 of 11)	2	58388644	58516272	127629	2	Acvr1-206	36539	Acvr1-206;Acvr1-203;Acvr1-202;Acvr1-204;Acvr1-201;Acvr1-205	Acvr1;Acvr1;Acvr1;Acvr1;Acvr1;Acvr1	0;0;0;0;0;0	TRUE
3227	cg05861987	0.000577975	0.0000208	27.76405132	4.54E-86	gain	yes	-0.000164535	0.0000354	-4.652359033	0.00000487	neg	ns	0.043973127	0.010361023	4.244091042	0.000029	pos	ns	4.537165326	-0.0000222	0.000356315	-0.062366751	0.950310964	neg	ns	0.492304102	Cadps2	Cadps2_Intron	6	23273362	23273411	23273410	23273411	50	+	TCAGTCCCAGACTCGGCAATTTTCTAACAAGGATTAAAGTTGTTTCTCCG	Intron (Cadps2-213/Cadps2, intron 28 of 29)	6	23262773	23839137	576365	2	Cadps2-213	565726	Cadps2-213;Cadps2-205;Cadps2-212;Cadps2-201;Cadps2-209;Cadps2-206;Cadps2-211;Cadps2-207;Cadps2-202;Cadps2-210	Cadps2;Cadps2;Cadps2;Cadps2;Cadps2;Cadps2;Cadps2;Cadps2;Cadps2;Cadps2	0;0;0;0;0;0;0;0;0;0	TRUE
782	cg13487069	0.0000775	0.0000081	9.571733112	3.49E-19	gain	yes	-0.000064	0.0000138	-4.648884271	0.00000494	neg	ns	0.0000392	0.004031253	0.00972966	0.992243235	pos	ns	0.003381853	0.000188092	0.000138634	1.356747029	0.17584875	pos	ns	0.800644166	Usp7	Usp7_Exon	16	8715910	8715959	8715910	8715911	50	+	CGTTACTCCCCTGGGAAGGACACAACCCTCATGAGGATTGATGGACATGC	Exon (Usp7-210/Usp7, exon 3 of 32)	16	8689595	8792308	102714	2	Usp7-207	76349	Usp7-207;Usp7-206;Usp7-208;Usp7-210	Usp7;Usp7;Usp7;Usp7	0;0;0;0	TRUE
8840	cg17945038	0.0000313	0.0000111	2.82293001	0.005066419	gain	ns	-0.0000876	0.0000189	-4.645976567	0.00000501	neg	ns	0.020519887	0.005522533	3.71566578	0.000240365	pos	ns	3.619128066	-0.000361067	0.000189919	-1.901157239	0.058208587	neg	ns	0.7237991	Vegfa	Vegfa_Exon	17	46021004	46021053	46021004	46021005	50	-	CGTTTAACTCAAGCTGCCTCGCCTTGCAACGCGAGTCTGTGTTTTTGCAG	Exon (Vegfa-202/Vegfa, exon 6 of 7)	17	46016993	46031815	14823	2	Vegfa-201	10762	Vegfa-201;Vegfa-202;Vegfa-210;Vegfa-207;Vegfa-205;Vegfa-208;Vegfa-204;Vegfa-206;Vegfa-203;Vegfa-209	Vegfa;Vegfa;Vegfa;Vegfa;Vegfa;Vegfa;Vegfa;Vegfa;Vegfa;Vegfa	0;0;0;0;0;0;0;0;0;10303	TRUE
9138	cg16582560	-0.000125134	0.000108086	-1.157728943	0.247865873	loss	ns	0.000853074	0.000183624	4.645771005	0.00000501	pos	ns	-0.077921496	0.053795517	-1.448475655	0.148494756	neg	ns	0.828288882	0.005906883	0.001850023	3.19286917	0.001553331	pos	ns	0.251483536	Samd4	Samd4_Exon	14	47083462	47083511	47083462	47083463	50	-	CGTCACCCATTTAAAAGTCCTGTTTGTTTTTGCAGGCATTTACAGAGACA	Exon (Samd4-201/Samd4, exon 9 of 13)	14	46882854	47103150	220297	1	Samd4-201	200608	Samd4-201;Samd4-211;Samd4-202;Samd4-206;Samd4-203;Samd4-204;Samd4-210;Samd4-205	Samd4;Samd4;Samd4;Samd4;Samd4;Samd4;Samd4;Samd4	0;0;0;0;0;0;0;-3624	TRUE
22190	cg06936709	0.000043	0.0000183	2.346257348	0.019592583	gain	ns	0.000144525	0.0000311	4.640603725	0.00000513	pos	ns	0.034532974	0.009123999	3.784850858	0.00018462	pos	ns	3.73372224	-0.000412494	0.000313774	-1.314622798	0.189608454	neg	ns	0.554825653	Hdx	Hdx_Promoter	X	111697094	111697143	111697094	111697095	50	-	CGATCATCAATTCTCATCATGATCGTGACGTCACAAAAGACAGCGGCCAA	Promoter (<=1kb)	20	111569931	111697079	127149	2	Hdx-202	-64	Hdx-202;Hdx-201	Hdx;Hdx	0;0	FALSE
26435	cg12460733	0.000036	0.00000601	5.984143971	0.000000006	gain	yes	-0.0000474	0.0000102	-4.637354034	0.00000521	neg	ns	-0.014030071	0.002992411	-4.688551544	0.00000413	neg	ns	5.38416903	0.000290903	0.000102909	2.826809347	0.005006997	pos	ns	0.86257713	Clcn6	Clcn6_Exon	4	148010745	148010794	148010745	148010746	50	+	CGCTCCTCCATGGTCCAGTCTTCACTTGGGGACTGGTCAGGGTATAGGTT	Exon (Clcn6-205/Clcn6, exon 20 of 23)	4	148004259	148038821	34563	2	Clcn6-205	28027	Clcn6-205;Clcn6-201;Clcn6-202	Clcn6;Clcn6;Clcn6	0;0;0	TRUE
777	cg12841944	0.0000052	0.00000616	0.843577112	0.399556212	gain	ns	-0.0000485	0.0000105	-4.631106829	0.00000536	neg	ns	0.002465975	0.003068285	0.803698132	0.422187169	pos	ns	0.37449497	-0.000318919	0.000105518	-3.022409908	0.002716866	neg	ns	0.833519769	Usp7	Usp7_Exon	16	8712062	8712111	8712110	8712111	50	-	AAAGCGTGGCATCACCATAATCTTCCATGGCAGATTTCGCACAAAACACG	Exon (Usp7-207/Usp7, exon 4 of 32)	16	8689595	8792308	102714	2	Usp7-207	80197	Usp7-207;Usp7-206;Usp7-208;Usp7-210	Usp7;Usp7;Usp7;Usp7	0;0;0;0	TRUE
13067	cg01462040	0.0000531	0.000013	4.085913012	0.000056	gain	ns	0.000102311	0.0000221	4.6305534	0.00000537	pos	ns	0.026631078	0.006473011	4.114171602	0.0000498	pos	ns	4.302384906	-0.000388376	0.000222606	-1.744675118	0.082032449	neg	ns	0.306718387	Aff2	Aff2_fiveUTR	X	69360277	69360326	69360277	69360278	50	+	CGGCTTCTAGCTGTCCAGGCTCCGCCCCCTGTGAGTGTGTAAGTGTGTGA	Promoter (<=1kb)	20	69360294	69868037	507744	1	Aff2-201	0	Aff2-201;Aff2-202;Aff2-203	Aff2;Aff2;Aff2	0;0;0	TRUE
27610	cg10915888	0.00000723	0.00000352	2.053543713	0.040858509	gain	ns	-0.0000277	0.00000598	-4.626767032	0.00000546	neg	ns	0.005259057	0.001752979	3.000069359	0.00291812	pos	ns	2.534896898	-0.0001844	0.0000603	-3.058809307	0.002416084	neg	ns	0.910390865	Copa	Copa_threeUTR	1	172110646	172110695	172110694	172110695	50	-	ACAGAACACTCATGCCCTTTGCCTCTTACAGCCATTGTGATCTGTAACCG	3' UTR	1	172082529	172122325	39797	1	Copa-206	28117	Copa-206;Copa-203;Copa-201;Copa-210;Copa-205;Copa-202	Copa;Copa;Copa;Copa;Copa;Copa	0;0;0;10910;-1496;0	TRUE
4364	cg04521819	0.0000442	0.00000918	4.812554205	0.00000233	gain	ns	-0.0000721	0.0000156	-4.625494499	0.0000055	neg	ns	0.000779288	0.004567336	0.170622055	0.86463226	pos	ns	0.063168565	-0.000211667	0.00015707	-1.347593755	0.178773121	neg	ns	0.815709858	Snd1	Snd1_Intron	6	28538007	28538056	28538055	28538056	50	+	GCGTTTTAGCTGATCTGTGCTGTTTGTAGCCATATGGTCCCCTGAGCACG	Intron (Snd1-203/Snd1, intron 8 of 16)	6	28480348	28877723	397376	1	Snd1-203	57659	Snd1-203;Snd1-201;Snd1-206	Snd1;Snd1;Snd1	0;0;0	TRUE
17105	cg21421484	-0.0000351	0.000021	-1.669779003	0.095972499	loss	ns	-0.00016476	0.0000357	-4.618340311	0.00000568	neg	ns	0.007690795	0.010451586	0.735849558	0.462378659	pos	ns	0.335002219	-0.000892225	0.000359429	-2.48233903	0.013581473	neg	ns	0.90754248	Gnptab	Gnptab_threeUTR	10	88429557	88429606	88429557	88429558	50	+	CGGAATATTTTCATTGTCACCAACGGGCAGATTCCATCCTGGCTGAACCT	Promoter (<=1kb)	10	88429566	88433288	3723	1	Gnptab-204	0	Gnptab-206;Gnptab-201;Gnptab-204;Gnptab-205	Gnptab;Gnptab;Gnptab;Gnptab	0;0;0;-3755	TRUE
19992	cg13470529	0.0000078	0.0000111	0.703917259	0.482012702	gain	ns	0.000087	0.0000188	4.616828244	0.00000572	pos	ns	0.024902919	0.005518232	4.51284376	0.00000909	pos	ns	5.041295398	-0.000588406	0.000189772	-3.100601297	0.002108672	neg	ns	0.461564021	Nhsl2	Nhsl2_fiveUTR	X	102005048	102005097	102005048	102005049	50	-	CGCGGTGGCTGCCAGTCCAGAGCAGAATGATGGGCAACTCTCACCACAAG	5' UTR	20	101849385	102076276	226892	1	Nhsl2-202	155663	Nhsl2-202;Nhsl2-201;Nhsl2-207;Nhsl2-206	Nhsl2;Nhsl2;Nhsl2;Nhsl2	0;0;0;0	TRUE
24375	cg08519469	-0.0000381	0.00000588	-6.481464796	3.57E-10	loss	yes	-0.0000461	0.00001	-4.615301211	0.00000575	neg	ns	0.000974631	0.002928609	0.332796665	0.739512719	pos	ns	0.131054352	-0.000488194	0.000100715	-4.847304482	0.00000198	neg	ns	0.771389946	Ing4	Ing4_threeUTR	6	125047874	125047923	125047874	125047875	50	+	CGAACCCACCTATTGCCTTTGTCACCAGGTCTCCTATGGAGAGATGATTG	3' UTR	6	125039760	125049002	9243	1	Ing4-205	8114	Acrbp-205;Acrbp-204;Acrbp-202;Acrbp-201;Acrbp-203;Ing4-205;Ing4-203;Ing4-201;Ing4-208;Ing4-207;Ing4-202;Ing4-209;Ing4-204;Ing4-206	Acrbp;Acrbp;Acrbp;Acrbp;Acrbp;Ing4;Ing4;Ing4;Ing4;Ing4;Ing4;Ing4;Ing4;Ing4	-1766;-2024;-2036;-2044;-3931;0;8038;0;0;0;0;0;0;0	TRUE
269	cg16010785	0.000000627	0.0000133	0.047180304	0.962399905	gain	ns	0.000104112	0.0000226	4.612258244	0.00000583	pos	ns	0.022098572	0.006613113	3.341629432	0.0009348	pos	ns	3.029281425	-0.000344914	0.000227424	-1.516607653	0.130384813	neg	ns	0.575703926	Npas4	Npas4_threeUTR	19	4984354	4984403	4984402	4984403	50	-	ACCAAAAAGGCAAACTGGACTTTATTATAAAGTTGGCTACAAAGTCACCG	3' UTR	19	4984355	4989971	5617	2	Npas4-202	5568	Npas4-202;Npas4-201;Npas4-203	Npas4;Npas4;Npas4	0;0;0	TRUE
24851	cg05791576	0.0000697	0.00000725	9.620760032	2.42E-19	gain	yes	-0.0000568	0.0000123	-4.609002111	0.00000592	neg	ns	-0.000493699	0.003608197	-0.136826942	0.891256405	neg	ns	0.049997336	-0.0000225	0.000124086	-0.181700783	0.855936301	neg	ns	0.500184802	Gdf11	Gdf11_Exon	10	128886228	128886277	128886276	128886277	50	-	AGTTGCTCTGTGGCTGGCGGAACCAGCTGTGTAGCACTTGCTTGAAGTCG	Exon (Gdf11-201/Gdf11, exon 2 of 3)	10	128882295	128891718	9424	2	Gdf11-201	5441	Gdf11-201	Gdf11	0	TRUE
11394	cg15129042	0.0000223	0.00000731	3.050258997	0.00248385	gain	ns	0.0000572	0.0000124	4.60707139	0.00000597	pos	ns	0.014142903	0.003639601	3.885838869	0.000124726	pos	ns	3.904043013	-0.000259354	0.000125166	-2.07208658	0.039083894	neg	ns	0.458266	Zic3	Zic3_Intergenic_upstream	X	57921633	57921682	57921633	57921634	50	+	CGATCCTGGAGGACAGAGCGTGAAAGGGTTATCATCATCAGTTTTGACTG	Distal Intergenic	20	58022700	58031448	8749	1	Zic3-204	-101018	NA	NA	NA	FALSE
26939	cg17906950	-0.0000208	0.00000537	-3.875466805	0.000129902	loss	ns	-0.000042	0.00000912	-4.605719811	0.00000601	neg	ns	0.007376955	0.002671416	2.761439846	0.006097855	pos	ns	2.214822885	-0.000492448	0.0000919	-5.360284828	0.000000163	neg	yes	0.740824194	Itch	Itch_Exon	2	155206326	155206375	155206326	155206327	50	+	CGTTTGTGGGTGATTTTTCCAGGAGAAGAAGGTTTAGATTATGGAGGTGT	Exon (Itch-201/Itch, exon 17 of 25)	2	155133509	155226855	93347	1	Itch-201	72817	Itch-201;Itch-206;Itch-202;Itch-203	Itch;Itch;Itch;Itch	0;72795;0;0	TRUE
14900	cg00896768	0.0000077	0.00000281	2.736790149	0.006562164	gain	ns	-0.000022	0.00000478	-4.604006317	0.00000605	neg	ns	-0.002044703	0.001400326	-1.460162377	0.14525813	neg	ns	0.837859551	-0.0000698	0.0000482	-1.449790888	0.148127763	neg	ns	0.899142404	Fam222b	Fam222b_fiveUTR	11	78143140	78143189	78143188	78143189	50	-	CCTGTCTACCAGGGCCAGGTGACCTGTCCTTTCAGCTTCTTTCTCACACG	5' UTR	11	78094660	78156700	62041	1	Fam222b-201	48480	Fam222b-201;Fam222b-202;Fam222b-203	Fam222b;Fam222b;Fam222b	0;0;0	TRUE
24493	cg13326443	0.0000165	0.0000215	0.769048053	0.442450311	gain	ns	0.000168105	0.0000365	4.603150186	0.00000608	pos	ns	0.012976922	0.010698977	1.212912421	0.226086756	pos	ns	0.645724877	0.000215932	0.000367937	0.586871662	0.557717043	pos	ns	0.392696345	Kcna1	Kcna1_Exon	6	126642173	126642222	126642173	126642174	50	-	CGATGGCACACAAGGAGCCCACGATCTTGCCTCCAATTGTCACAGGGTAC	Exon (Kcna1-201/Kcna1, exon 2 of 2)	6	126640397	126644796	4400	2	Kcna1-201	2574	Kcna1-201;Kcna1-202;Kcna1-203	Kcna1;Kcna1;Kcna1	0;0;0	TRUE
24443	cg08593249	0.0000491	0.00000554	8.863091751	6.22E-17	gain	yes	-0.0000433	0.0000094	-4.600911867	0.00000614	neg	ns	-0.003203182	0.002755188	-1.162599931	0.245886067	neg	ns	0.60926608	0.0000102	0.0000948	0.107404708	0.914537397	pos	ns	0.696829041	Map7d1	Map7d1_Exon	4	126238588	126238637	126238588	126238589	50	+	CGTGTTTGGGCAGGTTAACTGCCGACACGGAGCACCTGCTCCCACCTGGA	Exon (Map7d1-203/Map7d1, exon 6 of 18)	4	126232167	126240111	7945	2	Map7d1-204	1474	Map7d1-204;Map7d1-203;Map7d1-201;Map7d1-202;Map7d1-205	Map7d1;Map7d1;Map7d1;Map7d1;Map7d1	0;0;0;0;-3812	TRUE
21440	cg08957853	-0.00000169	0.00000923	-0.183117984	0.85482515	loss	ns	-0.0000721	0.0000157	-4.600649268	0.00000615	neg	ns	0.036302939	0.004592869	7.904196157	4.76E-14	pos	yes	13.32228312	-0.001351088	0.000157948	-8.553983313	5.56E-16	neg	yes	0.758776203	Rbm5	Rbm5_threeUTR	9	107759792	107759841	107759840	107759841	50	+	CAGCTGGTAGCATCTTGCAAGTGATAAAACTCCACGAAGGCGAAACCACG	3' UTR	9	107740371	107770996	30626	2	Rbm5-214	11155	Rbm5-214;Rbm5-219;Rbm5-224;Rbm5-210;Rbm5-201;Rbm5-211;Rbm5-221;Rbm5-220;Rbm5-223;Rbm5-208;Rbm5-203;Rbm5-204;Rbm5-218	Rbm5;Rbm5;Rbm5;Rbm5;Rbm5;Rbm5;Rbm5;Rbm5;Rbm5;Rbm5;Rbm5;Rbm5;Rbm5	0;0;0;0;0;0;0;0;0;0;0;11118;11104	TRUE
23252	cg15713562	0.000145764	0.00000964	15.12394657	4.35E-39	gain	yes	-0.0000753	0.0000164	-4.597147438	0.00000624	neg	ns	-0.005655005	0.004796907	-1.178885713	0.239347721	neg	ns	0.620970703	0.000136525	0.000164965	0.827600835	0.408533225	pos	ns	0.719164426	Eri3	Eri3_Intron	4	117611419	117611468	117611467	117611468	50	+	TGTTGAAATGAGAAACCCCTATTTCCTAGCTTGACCCCCTCACTAATTCG	Intron (Eri3-201/Eri3, intron 6 of 8)	4	117550365	117674297	123933	1	Eri3-201	61054	Eri3-201;Eri3-206;Eri3-202;Eri3-204	Eri3;Eri3;Eri3;Eri3	0;0;0;0	TRUE
21470	cg13080172	0.0000048	0.00000951	0.505086906	0.61385668	gain	ns	0.0000742	0.0000162	4.593299926	0.00000635	pos	ns	0.011351665	0.004732184	2.398821313	0.017038403	pos	ns	1.768571108	-0.000189478	0.000162739	-1.164303359	0.245196347	neg	ns	0.916777924	Bcl11b	Bcl11b_Exon	12	107916615	107916664	107916663	107916664	50	-	GGCCTTGTGCATGTGCGTCTTCATGTGGCGCTTGAGCTTGCTGGCCTGCG	Exon (Bcl11b-201/Bcl11b, exon 4 of 4)	12	107910403	108003602	93200	2	Bcl11b-201	86938	Bcl11b-201;Bcl11b-202;Bcl11b-203	Bcl11b;Bcl11b;Bcl11b	0;0;0	TRUE
4511	cg23405587	-0.0000463	0.0000451	-1.027230945	0.305112578	loss	ns	-0.000351943	0.0000766	-4.592532678	0.00000638	neg	ns	-0.064635418	0.022451071	-2.878945828	0.00426756	neg	ns	2.369820344	-0.000268062	0.00077209	-0.347189786	0.728684327	neg	ns	0.633647077	Echdc1	Echdc1_threeUTR	10	29347353	29347402	29347401	29347402	50	-	ACTCCCTTCTTTGGTATATCTATTATATCTCGCTTAATCTTCCTGCGACG	3' UTR	10	29313500	29347469	33970	1	Echdc1-201	33853	Echdc1-202;Echdc1-204;Echdc1-201;Rnf146-202;Rnf146-201;Rnf146-203;Rnf146-205;Rnf146-204;Rnf146-206	Echdc1;Echdc1;Echdc1;Rnf146;Rnf146;Rnf146;Rnf146;Rnf146;Rnf146	34187;34072;0;0;0;0;0;0;0	TRUE
11025	cg20778764	-0.00000861	0.0000188	-0.457565955	0.647584829	loss	ns	0.000146754	0.000032	4.58913429	0.00000647	pos	ns	0.033603127	0.009368663	3.586758172	0.000388895	pos	ns	3.410168055	-0.000635862	0.000322188	-1.973576298	0.049317727	neg	ns	0.316053016	Mbip	Mbip_Intergenic_downstream	12	56302180	56302229	56302180	56302181	50	-	CGCTGCTCAGGCGCGCACAGTAATATGCAATAAAACAGCAAGAAGTGAAT	Distal Intergenic	12	56340511	56345821	5311	2	Mbip-202	43641	NA	NA	NA	FALSE
6842	cg24991381	0.0000685	0.00000799	8.577423531	4.72E-16	gain	yes	-0.0000622	0.0000136	-4.588415624	0.00000649	neg	ns	0.017316809	0.003974456	4.357026057	0.0000179	pos	ns	4.745994845	-0.000896945	0.000136681	-6.562313785	2.22E-10	neg	yes	0.768605338	Nr6a1	Nr6a1_Exon	2	38739038	38739087	38739038	38739039	50	+	CGCAGAAGAAAGGCAGTTTCTTGATCCAGGCAATCTGCCTAAAGAGCAGC	Exon (Nr6a1-202/Nr6a1, exon 9 of 12)	2	38723370	38927688	204319	2	Nr6a1-202	188601	Nr6a1-202;Nr6a1-210;Nr6a1-201;Nr6a1-204;Nr6a1-205;Nr6a1-207;Nr6a1-206;Nr6a1-208;Nr6a1-209;Nr6a1-211	Nr6a1;Nr6a1;Nr6a1;Nr6a1;Nr6a1;Nr6a1;Nr6a1;Nr6a1;Nr6a1;Nr6a1	0;0;0;0;0;45433;46024;0;45382;24678	TRUE
11024	cg06981318	-0.00000368	0.0000186	-0.197429724	0.843620658	loss	ns	0.00014512	0.0000317	4.582392721	0.00000667	pos	ns	0.032708483	0.009277971	3.525391921	0.000486649	pos	ns	3.312784544	-0.000588776	0.000319069	-1.845294322	0.06594831	neg	ns	0.349635707	Mbip	Mbip_Intergenic_downstream	12	56302140	56302189	56302140	56302141	50	-	CGTGTGCCCTGACTTGATTGTAATTGCCCGAATCTGCTCCCGCTGCTCAG	Distal Intergenic	12	56340511	56345821	5311	2	Mbip-202	43681	NA	NA	NA	FALSE
11811	cg01085723	-0.0000183	0.0000124	-1.46850759	0.142980354	loss	ns	0.0000968	0.0000211	4.580209518	0.00000674	pos	ns	0.019875252	0.006193784	3.208903043	0.001471905	pos	ns	2.832120136	-0.000538174	0.000213004	-2.526594263	0.012014873	neg	ns	0.476528936	Gm14660	Gm14660_Intergenic_downstream	X	60831615	60831664	60831663	60831664	50	+	AAATACAGTTCAGTGGGCCTGAATTGATACGCTCAGCCCCTAAAGCCCCG	Distal Intergenic	20	60818208	60818782	575	1	Gm14660-201	13407	NA	NA	NA	FALSE
13528	cg08357176	0.00000942	0.00000845	1.11450714	0.265924991	gain	ns	0.0000658	0.0000144	4.579683022	0.00000675	pos	ns	0.011786231	0.004207541	2.80121582	0.005411014	pos	ns	2.266721344	-0.000103907	0.000144697	-0.718103352	0.473234396	neg	ns	0.620946298	Adamts16	Adamts16_Intergenic_upstream	13	71165711	71165760	71165759	71165760	50	-	ATGACAGCAGGCACTTAATTTGCATGTTCGACAGACAACAAACGGCCCCG	Distal Intergenic	13	70727802	70841811	114010	2	Adamts16-201	-323949	NA	NA	NA	FALSE
21389	cg01045442	-0.0000602	0.0000111	-5.439422639	0.000000109	loss	yes	0.0000859	0.0000188	4.573966686	0.00000693	pos	ns	0.018361824	0.005504195	3.335968816	0.000953362	pos	ns	3.020742208	-0.000304809	0.000189289	-1.610287463	0.108352857	neg	ns	0.79642571	Psmd7	Psmd7_Intergenic_upstream	8	107603437	107603486	107603485	107603486	50	-	ATTACTGCTTTATTTTGCTGTCTTGGTTTAAAATCATTTTAACCACTCCG	Distal Intergenic	8	107580381	107588464	8084	2	Psmd7-201	-15022	NA	NA	NA	FALSE
4199	cg05950040	0.000000859	0.000017	0.050379171	0.959852679	gain	ns	-0.000132437	0.000029	-4.5734875	0.00000694	neg	ns	0.029643567	0.008483585	3.494226558	0.000544696	pos	ns	3.263845825	-0.001240069	0.00029175	-4.250455403	0.0000283	neg	ns	0.660505052	Tasor	Tasor_threeUTR	14	27480651	27480700	27480699	27480700	50	+	TGACATTAACCCCTTTGGAGCTGGGAGTTGGGATTTCCCAACATTAAACG	3' UTR	14	27428834	27483555	54722	1	Tasor-201	51817	Ccdc66-202;Ccdc66-203;Ccdc66-201;Tasor-201;Tasor-204	Ccdc66;Ccdc66;Ccdc66;Tasor;Tasor	27760;3175;27745;0;0	TRUE
21312	cg08391895	0.000112401	0.0000102	11.0263552	4.51E-24	gain	yes	-0.0000792	0.0000173	-4.57255211	0.00000697	neg	ns	0.042032264	0.005073562	8.284566541	3.61E-15	pos	yes	14.4423113	-0.001243929	0.000174479	-7.129374117	7.13E-12	neg	yes	0.83592508	Rbm15	Rbm15_Exon	3	107330210	107330259	107330210	107330211	50	-	CGCACCACGGACAATGATCATGACCAGGTAATCTTCTTCAGATTTGGCCA	Exon (Rbm15-201/Rbm15, exon 1 of 2)	3	107325421	107333673	8253	2	Rbm15-201	3414	Rbm15-201;Rbm15-202	Rbm15;Rbm15	0;0	TRUE
25180	cg27735940	0.00000293	0.000009	0.325331183	0.745149896	gain	ns	0.0000699	0.0000153	4.567428185	0.00000713	pos	ns	0.001939991	0.004481083	0.432929065	0.665367353	pos	ns	0.176938512	0.000209819	0.000154104	1.361541941	0.174331208	pos	ns	0.58206096	Gm10051	Gm10051_Intergenic_downstream	5	133482428	133482477	133482476	133482477	50	+	CTTATCTAAATTTAGAACTAGGCCAGGCTTTGAGGCTTGCCCTTCGTTCG	Distal Intergenic	5	133475123	133475536	414	1	Gm10051-201	7305	NA	NA	NA	FALSE
11020	cg08743477	-0.0000189	0.0000497	-0.379734458	0.704402549	loss	ns	0.00038567	0.0000845	4.566020481	0.00000718	pos	ns	0.073223503	0.024745462	2.959067904	0.003323422	pos	ns	2.478414543	-0.001036901	0.000850994	-1.218457512	0.223976628	neg	ns	0.489943565	Mbip	Mbip_Intergenic_downstream	12	56302089	56302138	56302089	56302090	50	+	CGATAAGTGCCTCATCAGTATCCTCATCATGCTCGTGTTGCTCCGCCGCG	Distal Intergenic	12	56340511	56345821	5311	2	Mbip-202	43683	NA	NA	NA	FALSE
1973	cg01589578	0.00000309	0.00000868	0.355731838	0.722283344	gain	ns	0.0000674	0.0000148	4.565319482	0.0000072	pos	ns	-0.000315422	0.004322046	-0.072979866	0.941869204	neg	ns	0.026009403	0.000140806	0.000148635	0.94733095	0.344208025	pos	ns	0.705974597	Tfec	Tfec_Intergenic_downstream	6	16727592	16727641	16727640	16727641	50	-	ATTAATCTTATGGAAATCTCCTGAAGCCAGATTCCAGCAAGGTTGCCCCG	Distal Intergenic	6	16834692	16835263	572	2	Tfec-204	107671	NA	NA	NA	FALSE
9942	cg21064897	0.0000315	0.00000769	4.098873035	0.0000531	gain	ns	0.0000596	0.0000131	4.56519068	0.00000721	pos	ns	0.01750993	0.00382791	4.574279089	0.00000692	pos	ns	5.159995215	-0.000435473	0.000131642	-3.308018816	0.001050149	neg	ns	0.500761898	Hs6st2	Hs6st2_Exon	X	51680379	51680428	51680427	51680428	50	-	TTGTTGGATTTCTCATCCATGTTCCCGACGCTGGGGGAAACCCAAGCTCG	Exon (Hs6st2-201/Hs6st2, exon 2 of 5)	20	51387212	51681703	294492	2	Hs6st2-201	1275	Hs6st2-201;Hs6st2-202;Hs6st2-204;Hs6st2-205;Hs6st2-203	Hs6st2;Hs6st2;Hs6st2;Hs6st2;Hs6st2	0;0;0;0;0	TRUE
26356	cg15782392	0.00015096	0.00000918	16.4463208	3.93E-44	gain	yes	-0.0000712	0.0000156	-4.563005852	0.00000728	neg	ns	-0.010545987	0.004568447	-2.308440299	0.021632421	neg	ns	1.664894878	0.000424493	0.000157109	2.701909608	0.007273817	pos	ns	0.838065546	Kiz	Kiz_Intron	2	146958905	146958954	146958905	146958906	50	+	CGATGTTTATTGTATTATAAATCACGGGCAAGTAGGCAGATTGGCAACAG	Intron (Kiz-201/Kiz, intron 12 of 13)	2	146855864	146970097	114234	1	Kiz-201	103041	Kiz-201;Kiz-202	Kiz;Kiz	0;0	TRUE
25602	cg20198417	0.00000932	0.0000159	0.585080506	0.558919204	gain	ns	0.00012331	0.0000271	4.556534134	0.00000749	pos	ns	0.021040904	0.007928337	2.653885992	0.008367453	pos	ns	2.077406703	0.00000168	0.000272655	0.006163982	0.99508585	pos	ns	0.679913766	Ebf3	Ebf3_Intron	7	137306981	137307030	137306981	137306982	50	+	CGACAGCTACAATTGGAAAAAAATTAGGACACATTTTGCAACTAATTGAG	Intron (Ebf3-204/Ebf3, intron 6 of 15)	7	137193673	137314445	120773	2	Ebf3-204	7415	Ebf3-204;Ebf3-201;Ebf3-202;Ebf3-203;Ebf3-208;Ebf3-206	Ebf3;Ebf3;Ebf3;Ebf3;Ebf3;Ebf3	0;0;0;0;0;0	TRUE
20728	cg26114982	0.0000479	0.0000121	3.959254644	0.0000933	gain	ns	0.0000936	0.0000206	4.556152804	0.0000075	pos	ns	0.028390381	0.006021115	4.71513691	0.00000366	pos	ns	5.436951298	-0.000490249	0.000207066	-2.36759992	0.018517555	neg	ns	0.401994718	Zdhhc15	Zdhhc15_Exon	X	104670711	104670760	104670759	104670760	50	+	AGGACAATAACGAGCACTGGCACCCAGGACAGTACCCGGCGGCAGCACCG	Promoter (<=1kb)	20	104536969	104671064	134096	2	Zdhhc15-201	304	Zdhhc15-201	Zdhhc15	0	TRUE
1776	cg14280211	-0.00000438	0.0000121	-0.360341009	0.718837528	loss	ns	0.000094	0.0000206	4.555136667	0.00000754	pos	ns	0.011456587	0.006045294	1.895124767	0.059006068	pos	ns	1.229103321	0.000047	0.000207897	0.22620955	0.821187519	pos	ns	0.135467127	Kctd1	Kctd1_Promoter	18	15151715	15151764	15151763	15151764	50	+	TCTAACTTGCTTTTTACCCTCCTCTTGCACAGAAAAGCTGATTTTAATCG	Promoter (<=1kb)	18	14968685	15151446	182762	2	Kctd1-201	-269	Kctd1-201	Kctd1	0	FALSE
10027	cg14002243	0.0000448	0.0000061	7.330760978	2.00E-12	gain	yes	-0.0000472	0.0000104	-4.55379831	0.00000758	neg	ns	-0.004155923	0.003038381	-1.367808246	0.172362825	neg	ns	0.763556396	0.000210938	0.00010449	2.018740398	0.044374884	pos	ns	0.86145391	Skap2	Skap2_Intron	6	51975873	51975922	51975921	51975922	50	+	TCCACCAGCCACAAACTTAGAAACAGTCTTGAATTATTTGTTGCTGACCG	Intron (Skap2-205/Skap2, intron 4 of 12)	6	51857422	52012549	155128	2	Skap2-205	36627	Skap2-205;Skap2-201	Skap2;Skap2	0;0	TRUE
20316	cg04794183	0.000081	0.00000537	15.08210553	6.27E-39	gain	yes	-0.0000415	0.00000912	-4.55203606	0.00000764	neg	ns	0.000833356	0.002672912	0.31177822	0.75541866	pos	ns	0.121812292	0.00000665	0.0000919	0.072356884	0.942364557	pos	ns	0.166723268	Hoxc5	Hoxc5_Intron	15	102998073	102998122	102998073	102998074	50	-	CGCTACACAAATGCATCGCATTCCCGGTTGTTTGCAGAAAATTTACAGCT	Intron (Hoxc5-202/Hoxc5, intron 1 of 1)	15	102967443	103015676	48234	1	Hoxc5-202	30630	Hoxc5-202;Hoxc6-202;Hoxc6-203;Hoxc8-201;Hoxc8-202	Hoxc5;Hoxc6;Hoxc6;Hoxc8;Hoxc8	0;0;0;0;0	TRUE
17472	cg15562933	-0.0000284	0.0000096	-2.954565075	0.003370939	loss	ns	0.0000742	0.0000163	4.550265141	0.0000077	pos	ns	0.008174949	0.004777347	1.711190069	0.08804632	pos	ns	1.055288791	-0.000199021	0.000164293	-1.21137962	0.226672555	neg	ns	0.57300177	Gm12635	Gm12635_Intergenic_upstream	4	90438060	90438109	90438060	90438061	50	+	CGTGGTGATTGATTCCTTGCCAGTATGGCATCACCACAGGGAGTGCAGCT	Distal Intergenic	4	90452874	90453625	752	1	Gm12635-201	-14765	NA	NA	NA	FALSE
18972	cg25479597	-0.000016	0.0000107	-1.504152447	0.133560219	loss	ns	0.0000823	0.0000181	4.548500756	0.00000776	pos	ns	-0.006073038	0.005301646	-1.145500441	0.252885449	neg	ns	0.597076159	0.000531173	0.000182323	2.913357378	0.003835555	pos	ns	0.848808095	Fbxl20	Fbxl20_Exon	11	98089619	98089668	98089619	98089620	50	+	CGCTGTCTGCTGCCCCCTACTGATGGGGGTGGAGTGACAGGTGCGAAGTA	Exon (Fbxl20-201/Fbxl20, exon 15 of 15)	11	98082556	98149612	67057	2	Fbxl20-201	59944	Fbxl20-201;Fbxl20-202	Fbxl20;Fbxl20	0;0	TRUE
22973	cg18416931	0.00000249	0.00000195	1.280412797	0.201357207	gain	ns	-0.000015	0.00000331	-4.545583094	0.00000786	neg	ns	-0.003341591	0.000968857	-3.449004299	0.000640537	neg	ns	3.193455792	0.0000564	0.0000333	1.693681798	0.091330231	pos	ns	0.9200054	Cnot2	Cnot2_threeUTR	10	116507106	116507155	116507106	116507107	50	-	CGGTAACTGAGTGCCTTGTGATAAGCTGCGATTTAACTGAGGGGTATTGT	3' UTR	10	116485161	116581511	96351	2	Cnot2-210	74356	Cnot2-210;Cnot2-204;Cnot2-212;Cnot2-203;Cnot2-202;Cnot2-213;Cnot2-209;Cnot2-214;Cnot2-215;Cnot2-205;Cnot2-207;Cnot2-211;Cnot2-217;Cnot2-216;Cnot2-206;Cnot2-201;Cnot2-208	Cnot2;Cnot2;Cnot2;Cnot2;Cnot2;Cnot2;Cnot2;Cnot2;Cnot2;Cnot2;Cnot2;Cnot2;Cnot2;Cnot2;Cnot2;Cnot2;Cnot2	0;0;0;0;0;0;0;0;0;0;0;0;0;0;0;0;0	TRUE
11157	cg11754189	-0.0000294	0.0000108	-2.728744728	0.006720486	loss	ns	0.0000831	0.0000183	4.541558253	0.00000801	pos	ns	0.012667082	0.005359458	2.363500731	0.018719914	pos	ns	1.72769616	-0.00037586	0.000184311	-2.039268649	0.04227101	neg	ns	0.24399813	Fhl1	Fhl1_Exon	X	56791383	56791432	56791383	56791384	50	+	CGTGGGTGGTGGTTCTTTATAGAAAAAATCGAAGCTTAGCAGCTCCTCGA	Exon (Fhl1-203/Fhl1, exon 7 of 8)	20	56731787	56793346	61560	1	Fhl1-201	59596	Fhl1-201;Fhl1-203;Fhl1-206;Fhl1-205;Fhl1-204;Fhl1-202;Fhl1-210;Fhl1-207;Fhl1-208;Fhl1-209	Fhl1;Fhl1;Fhl1;Fhl1;Fhl1;Fhl1;Fhl1;Fhl1;Fhl1;Fhl1	0;0;0;0;0;0;11564;0;3658;3385	TRUE
11026	cg25100008	-0.0000363	0.0000125	-2.91141993	0.003858775	loss	ns	0.0000963	0.0000212	4.539773695	0.00000807	pos	ns	0.021016736	0.006213866	3.382231785	0.000811201	pos	ns	3.090871502	-0.000309872	0.000213694	-1.450073459	0.148049008	neg	ns	0.235981371	Mbip	Mbip_Intergenic_downstream	12	56302191	56302240	56302191	56302192	50	-	CGCGCACAGTAATATGCAATAAAACAGCAAGAAGTGAATGTTAACCATCT	Distal Intergenic	12	56340511	56345821	5311	2	Mbip-202	43630	NA	NA	NA	FALSE
5715	cg09909555	-0.00005	0.0000129	-3.867002502	0.000134276	loss	ns	0.0000995	0.000022	4.530524506	0.00000841	pos	ns	0.010082405	0.006431741	1.567601151	0.1179944	pos	ns	0.928138603	-0.000507697	0.000221187	-2.295328964	0.022381797	neg	ns	0.558737415	Kctd15	Kctd15_Intergenic_downstream	7	34606318	34606367	34606366	34606367	50	+	AGACACACGGCCTCAGGCAGCCTAAAACCTTTGGAGACCAAAATGGCTCG	Distal Intergenic	7	34640182	34648744	8563	2	Kctd15-206	42377	NA	NA	NA	FALSE
24199	cg26672023	0.0000329	0.0000107	3.074635044	0.002295123	gain	ns	-0.0000824	0.0000182	-4.530120269	0.00000842	neg	ns	0.015221118	0.005331138	2.855135119	0.004591953	pos	ns	2.338002544	-0.000618463	0.000183337	-3.373362372	0.000836823	neg	ns	0.820974776	Pabpc4	Pabpc4_threeUTR	4	123295719	123295768	123295767	123295768	50	-	ACACTGATGTGCATTTGCTGGTCTGTTGTAGGGTCTGAGTGCCCGGACCG	3' UTR	4	123282825	123298925	16101	1	Pabpc4-204	12894	Pabpc4-204;Pabpc4-203;Pabpc4-208;Pabpc4-202;Pabpc4-201;Pabpc4-205;Pabpc4-206	Pabpc4;Pabpc4;Pabpc4;Pabpc4;Pabpc4;Pabpc4;Pabpc4	0;0;0;0;0;0;-1412	TRUE
22092	cg15309974	0.0000195	0.0000154	1.266119837	0.206420794	gain	ns	0.000118327	0.0000262	4.521245155	0.00000876	pos	ns	0.041781969	0.007667315	5.449361125	0.000000103	pos	ns	6.986239936	-0.000896017	0.000263678	-3.398144387	0.000767057	neg	ns	0.355867955	Pou3f4	Pou3f4_Exon	X	110814575	110814624	110814623	110814624	50	+	TCTCCAAAGTGATTACTTGCAGGGAGTTCCCAGCAATGGGCATCCCCTCG	Promoter (<=1kb)	20	110814280	110817207	2928	1	Pou3f4-201	295	Pou3f4-201	Pou3f4	0	TRUE
21972	cg10121219	0.0000264	0.00000422	6.272409475	1.19E-09	gain	yes	-0.0000324	0.00000716	-4.520976323	0.00000877	neg	ns	-0.004050323	0.002098113	-1.930459782	0.054461781	neg	ns	1.263908161	0.000138116	0.0000722	1.914182385	0.056517346	pos	ns	0.884986734	Phlpp2	Phlpp2_Exon	8	109876863	109876912	109876863	109876864	50	-	CGAGAAAGAGACTGGCTAAGAGAAGATGTAAAGAGAGGCTGTGTTTACCT	Exon (Phlpp2-202/Phlpp2, exon 2 of 4)	8	109868542	109904971	36430	1	Phlpp2-202	8321	Phlpp2-202;Phlpp2-203;Phlpp2-201	Phlpp2;Phlpp2;Phlpp2	0;0;0	TRUE
15839	cg17331449	0.00000947	0.00000751	1.260317824	0.208502581	gain	ns	0.0000576	0.0000128	4.516546634	0.00000895	pos	ns	0.016210802	0.003739358	4.335183243	0.0000197	pos	ns	4.70526268	-0.000367175	0.000128596	-2.855257266	0.004590233	neg	ns	0.457049772	Scube1	Scube1_Exon	15	83651722	83651771	83651770	83651771	50	-	CTCAATTGCAGCCTCATCCTTCTCTAAAACACAAGTAAGGGACAAACACG	Exon (Scube1-201/Scube1, exon 7 of 23)	15	83604999	83725021	120023	2	Scube1-204	73250	Scube1-204;Scube1-202;Scube1-201;Scube1-203;Scube1-205;Scube1-206	Scube1;Scube1;Scube1;Scube1;Scube1;Scube1	0;0;0;0;0;0	TRUE
27528	cg08760632	0.00000404	0.00000717	0.563646699	0.573402094	gain	ns	0.000055	0.0000122	4.516062838	0.00000896	pos	ns	0.003022377	0.003568912	0.846862224	0.397725207	pos	ns	0.400416883	0.0000448	0.000122735	0.365172664	0.71523154	pos	ns	0.571877221	Zfp64	Zfp64_Intergenic_upstream	2	169158811	169158860	169158859	169158860	50	+	TCCCCCTTGCTTTGACAAGTACGTAATTTTCTTCAGAGATGCTCTTCACG	Distal Intergenic	2	168893331	168955587	62257	2	Zfp64-203	-203224	NA	NA	NA	FALSE
19585	cg07459759	0.0000305	0.0000125	2.432218833	0.01557242	gain	ns	0.0000961	0.0000213	4.513610872	0.00000906	pos	ns	0.030757053	0.006237219	4.931212899	0.00000133	pos	ns	5.874664549	-0.000863385	0.000214497	-4.025151879	0.0000716	neg	ns	0.254364841	Eda	Eda_Promoter	X	99975104	99975153	99975104	99975105	50	-	CGTCTGTTAAACGCTTTGAAGATTGGAAGCAACAGATAAGTACTGGATGA	Promoter (<=1kb)	20	99975606	100400762	425157	1	Eda-207	-502	Eda-211;Eda-208;Eda-209;Eda-202;Eda-203;Eda-206;Eda-205;Eda-207;Eda-204;Eda-201	Eda;Eda;Eda;Eda;Eda;Eda;Eda;Eda;Eda;Eda	0;0;0;0;0;0;0;0;0;0	FALSE
10223	cg21447117	0.0000404	0.00000995	4.058830448	0.0000625	gain	ns	-0.0000763	0.0000169	-4.512048016	0.00000913	neg	ns	0.002741332	0.004950978	0.553695195	0.580186603	pos	ns	0.236432304	0.000170044	0.000170264	0.998709757	0.318714227	pos	ns	0.348383116	Hoxa11	Hoxa11_fiveUTR	6	52245778	52245827	52245826	52245827	50	+	CCTCTTTGAAGCGGATCCGTGAAGTAGAAATTTGGAGACGTAAGCTGACG	Promoter (<=1kb)	6	52242106	52245810	3705	2	Hoxa11-201	0	Hoxa10-201;Hoxa10-204;Hoxa11-201;Hoxa11-202	Hoxa10;Hoxa10;Hoxa11;Hoxa11	0;0;0;0	TRUE
27247	cg25103781	0.0000678	0.0000129	5.251610408	0.000000281	gain	yes	0.0000989	0.0000219	4.509767449	0.00000922	pos	ns	0.019980291	0.00642319	3.110649455	0.002040345	pos	ns	2.690296464	-0.000171581	0.000220893	-0.776760063	0.437892627	neg	ns	0.320521015	Nhs	Nhs_Exon	X	161908764	161908813	161908764	161908765	50	+	CGCTCCATCAAAGCAGGGGCATCGGCCCCTCCACTGCTTCAATGCTGCAG	Exon (Gm15202-201/Gm15202-201, exon 2 of 2)	20	161833296	162159730	326435	2	Nhs-202	250917	Nhs-202;Nhs-201	Nhs;Nhs	0;0	TRUE
7292	cg02347319	0.0000264	0.0000176	1.50014571	0.134594405	gain	ns	0.000134559	0.0000298	4.509031259	0.00000925	pos	ns	0.046931281	0.008742718	5.368042112	0.000000156	pos	ns	6.806112642	-0.00083156	0.000300661	-2.765768109	0.006019466	neg	ns	0.343049828	Stag2	Stag2_Intron	X	42151222	42151271	42151270	42151271	50	+	AGAAGGTGTGGGAAACAGCATCAAGTAGTTCCGCAAAACTTTGAGCCCCG	Intron (Stag2-203/Stag2, intron 1 of 33)	20	42149317	42277185	127869	1	Stag2-203	1905	Stag2-203;Stag2-202;Stag2-207;Stag2-205;Stag2-208;Stag2-201;Stag2-204;Stag2-206	Stag2;Stag2;Stag2;Stag2;Stag2;Stag2;Stag2;Stag2	0;0;0;0;0;0;0;-909	TRUE
24921	cg08866851	0.0000267	0.00000763	3.498590793	0.000536194	gain	ns	-0.0000584	0.000013	-4.507937641	0.00000929	neg	ns	0.000629759	0.003797878	0.165818569	0.868407821	pos	ns	0.061276274	-0.0000686	0.000130609	-0.525385134	0.599691059	neg	ns	0.879193142	Tmem39b	Tmem39b_threeUTR	4	129684385	129684434	129684433	129684434	50	-	GCAGCAGGTCACAGTAGCTGGCAGGCAGCAGGTGCTGCATGAGGATCACG	3' UTR	4	129676355	129696796	20442	2	Tmem39b-202	12362	Tmem39b-202;Tmem39b-201	Tmem39b;Tmem39b	0;0	TRUE
8844	cg19346212	0.0000397	0.0000102	3.900313833	0.000117828	gain	ns	-0.0000779	0.0000173	-4.506948801	0.00000933	neg	ns	0.032479266	0.005065344	6.412055863	5.35E-10	pos	ns	9.271782103	-0.00038452	0.000174197	-2.207391796	0.028018965	neg	ns	0.814512693	Vegfa	Vegfa_Exon	17	46021051	46021100	46021099	46021100	50	+	CAGGAACATTTACACGTCTGCGGATCTTGTACAAACAAATGCTTTCTCCG	Exon (Vegfa-202/Vegfa, exon 6 of 7)	17	46016993	46031815	14823	2	Vegfa-201	10715	Vegfa-201;Vegfa-202;Vegfa-210;Vegfa-207;Vegfa-205;Vegfa-208;Vegfa-204;Vegfa-206;Vegfa-203;Vegfa-209	Vegfa;Vegfa;Vegfa;Vegfa;Vegfa;Vegfa;Vegfa;Vegfa;Vegfa;Vegfa	0;0;0;0;0;0;0;0;0;10256	TRUE
4359	cg24246880	0.000224291	0.0000283	7.917692543	4.35E-14	gain	yes	-0.000216763	0.0000481	-4.50415691	0.00000945	neg	ns	-0.02721553	0.014099018	-1.930313786	0.054479935	neg	ns	1.263763415	0.000460948	0.000484864	0.950674763	0.342510089	pos	ns	0.42046946	Wnt5a	Wnt5a_Exon	14	28511616	28511665	28511616	28511617	50	+	CGAAATCAGATTTCCTGGTGAGGTTGCGTGGGTGGATTAATTTGGAAAAA	Exon (Wnt5a-203/Wnt5a, exon 1 of 4)	14	28504750	28527448	22699	1	Wnt5a-201	6866	Wnt5a-201;Wnt5a-204;Wnt5a-206;Wnt5a-203;Wnt5a-202;Wnt5a-205	Wnt5a;Wnt5a;Wnt5a;Wnt5a;Wnt5a;Wnt5a	0;5716;0;0;0;0	TRUE
22107	cg13552338	0.0000491	0.00000663	7.410691151	1.20E-12	gain	yes	-0.0000507	0.0000113	-4.502627691	0.00000951	neg	ns	-0.005349006	0.003298177	-1.621806829	0.105861291	neg	ns	0.975262814	0.0000711	0.000113424	0.62667799	0.531331549	pos	ns	0.798434919	Ctr9	Ctr9_Exon	7	111038394	111038443	111038394	111038395	50	+	CGTTTAGGAATGGGTCATTGCTTTGTGAAACTTAACAAACTGGAAAAAGC	Exon (Ctr9-201/Ctr9, exon 6 of 25)	7	111028951	111056377	27427	1	Ctr9-201	9443	Ctr9-201;Ctr9-207;Ctr9-204;Ctr9-203	Ctr9;Ctr9;Ctr9;Ctr9	0;0;0;4358	TRUE
310	cg15746205	-0.0000222	0.00000703	-3.154029182	0.001768159	loss	ns	-0.0000538	0.0000119	-4.501254859	0.00000957	neg	ns	0.004567127	0.003499563	1.305056113	0.192841606	pos	ns	0.71479926	-0.000578481	0.00012035	-4.806664096	0.0000024	neg	ns	0.810092632	Ewsr1	Ewsr1_Exon	11	5080683	5080732	5080731	5080732	50	+	TGTAACCTGTAGCATATAAATGCGACAAAGCATGTTAAAAAGTTTCCACG	Exon (Ewsr1-204/Ewsr1, exon 9 of 9)	11	5069689	5099266	29578	2	Ewsr1-203	18534	Ewsr1-203;Ewsr1-202;Ewsr1-205;Ewsr1-209;Ewsr1-212;Ewsr1-208;Ewsr1-211;Ewsr1-204;Ewsr1-210	Ewsr1;Ewsr1;Ewsr1;Ewsr1;Ewsr1;Ewsr1;Ewsr1;Ewsr1;Ewsr1	0;0;0;0;-2162;0;0;0;5304	TRUE
25361	cg25667123	0.000124265	0.00000879	14.1345435	2.36E-35	gain	yes	-0.0000672	0.0000149	-4.500534182	0.0000096	neg	ns	-0.000157074	0.004375678	-0.035897055	0.971387547	neg	ns	0.012607468	0.000534378	0.000150479	3.551176795	0.000443059	pos	ns	0.703333498	Gm9341	Gm9341_Intergenic_downstream	7	135965754	135965803	135965802	135965803	50	-	CTGTGTTTGTCTTTGGCTCTCAGAAGGACAAAATTCACCATGTGGCGACG	Distal Intergenic	7	135952798	135953783	986	1	Gm9341-201	13005	NA	NA	NA	FALSE
17171	cg19710076	0.000184178	0.0000256	7.196685181	4.68E-12	gain	yes	-0.000195513	0.0000435	-4.496874034	0.00000976	neg	ns	0.044658754	0.012737458	3.506096208	0.000521863	pos	ns	3.282443427	-0.001407041	0.00043804	-3.212128632	0.00145601	neg	ns	0.62015257	Sall1	Sall1_Exon	8	89030317	89030366	89030317	89030318	50	-	CGCATCTGATGTGTCAACATGTGCTGCTTCAAATTACCCTTTGTGGAAAA	Exon (Sall1-201/Sall1, exon 3 of 4)	8	89027235	89044162	16928	2	Sall1-201	13796	Sall1-201	Sall1	0	TRUE
17291	cg24927174	0.000107973	0.0000121	8.920480779	4.12E-17	gain	yes	-0.0000925	0.0000206	-4.496429982	0.00000978	neg	ns	0.01216241	0.006024257	2.018906367	0.044357525	pos	ns	1.353032697	-0.00035269	0.000207174	-1.702389674	0.089684792	neg	ns	0.31110726	Shc1	Shc1_fiveUTR	3	89422286	89422335	89422286	89422287	50	+	CGGGGCTGGCTGCATCCCAACGACAAAGTCATGGGACCCGGGGTTTCCTA	5' UTR	3	89418443	89430015	11573	1	Shc1-201	3843	Cks1b-201;Cks1b-202;Cks1b-203;Shc1-201;Shc1-204;Shc1-210;Shc1-209;Shc1-205;Shc1-203;Shc1-208;Shc1-202;Shc1-206;Shc1-207	Cks1b;Cks1b;Cks1b;Shc1;Shc1;Shc1;Shc1;Shc1;Shc1;Shc1;Shc1;Shc1;Shc1	0;0;0;0;0;0;0;0;0;0;0;0;-2191	TRUE
15286	cg00080475	-0.0000328	0.0000113	-2.899265973	0.004007389	loss	ns	0.0000864	0.0000192	4.496080663	0.00000979	pos	ns	0.004113663	0.005629043	0.730792612	0.4654578	pos	ns	0.332119688	0.000171506	0.000193582	0.885960466	0.376325564	pos	ns	0.837110326	Gm8371	Gm8371_Intergenic_downstream	13	80195161	80195210	80195209	80195210	50	+	ATGAACATACTTAAGGATATATCAATACGCTCATAAATCATCTGCAGGCG	Distal Intergenic	13	80161328	80161879	552	1	Gm8371-201	33833	NA	NA	NA	FALSE
23353	cg11654257	0.000021	0.0000101	2.074645106	0.038844276	gain	ns	-0.0000773	0.0000172	-4.495344048	0.00000982	neg	ns	-0.009682141	0.005040329	-1.920934311	0.055656945	neg	ns	1.254480633	-0.000319919	0.000173337	-1.845653497	0.06589595	neg	ns	0.71110457	Smg1	Smg1_threeUTR	7	118135402	118135451	118135402	118135403	50	-	CGAGATTTCCTAGGTTTCCTCAGAGTAAGCCCCCAGTTGCATCACCACCG	3' UTR	7	118131308	118243637	112330	2	Smg1-201	108186	Smg1-201;Smg1-204;Smg1-207	Smg1;Smg1;Smg1	0;0;0	TRUE
22193	cg15336560	0.0000506	0.0000183	2.766951863	0.005998186	gain	ns	0.000139537	0.0000311	4.492959839	0.00000993	pos	ns	0.036978177	0.009098596	4.064162987	0.0000612	pos	ns	4.213578666	-0.000520766	0.0003129	-1.664320372	0.097058828	neg	ns	0.393836515	Hdx	Hdx_Promoter	X	111697089	111697138	111697137	111697138	50	+	GTGTCCGATCATCAATTCTCATCATGATCGTGACGTCACAAAAGACAGCG	Promoter (<=1kb)	20	111569933	111697079	127147	2	Hdx-201	-10	Hdx-202;Hdx-201	Hdx;Hdx	0;0	FALSE
2277	cg11293159	0.0000157	0.0000147	1.066880268	0.286856064	gain	ns	-0.000112493	0.000025	-4.491705813	0.00000998	neg	ns	0.054272495	0.007337248	7.396846177	1.31E-12	pos	yes	11.88116293	-0.001280186	0.000252327	-5.073512365	0.000000674	neg	yes	0.52593186	Gm28539	Gm28539_threeUTR	16	18896660	18896709	18896660	18896661	50	+	CGGTAACTCCCCTCGGCCTGCTGTCTGAAGGCACAGATGTTGGCTGCACA	3' UTR	16	18836584	18956247	119664	1	Gm28539-201	60076	Gm28539-201;Hira-202;Hira-201;Hira-206;Hira-208;Hira-203	Gm28539;Hira;Hira;Hira;Hira;Hira	0;0;0;0;0;0	TRUE
21907	cg11819496	0.0000118	0.00000896	1.311661753	0.190604849	gain	ns	0.0000684	0.0000152	4.490130209	0.0000101	pos	ns	0.029421847	0.004459774	6.597161224	1.81E-10	pos	yes	9.742235323	-0.001019909	0.000153371	-6.649938098	1.32E-10	neg	yes	0.114022685	Bdnf	Bdnf_Intron	2	109692288	109692337	109692288	109692289	50	+	CGGAACTCTTCTAATAAAAGATGTATCATTTTAAATGCGCTGAATTTTGA	Intron (Bdnf-201/Bdnf, intron 1 of 1)	2	109674700	109727007	52308	1	Bdnf-201	17588	Bdnf-201;Bdnf-207;Bdnf-208;Bdnf-210;Bdnf-206;Bdnf-209;Bdnf-211;Bdnf-205;Bdnf-203;Bdnf-204	Bdnf;Bdnf;Bdnf;Bdnf;Bdnf;Bdnf;Bdnf;Bdnf;Bdnf;Bdnf	0;0;0;0;0;0;0;0;0;0	TRUE
20521	cg00426154	0.0000312	0.00000411	7.59304929	3.71E-13	gain	yes	-0.0000313	0.00000697	-4.487761576	0.0000102	neg	ns	-0.001567587	0.002043227	-0.767211169	0.443539889	neg	ns	0.353067317	0.00020659	0.0000703	2.940090806	0.003527923	pos	ns	0.842996948	Mycbp2	Mycbp2_Exon	14	103269372	103269421	103269372	103269373	50	+	CGTTTATGCTTTAGCTGTGCTGGATGGGATCTGAGTCTGGCTAGAGCCTG	Exon (Mycbp2-202/Mycbp2, exon 18 of 83)	14	103113411	103346418	233008	2	Mycbp2-202	76997	Mycbp2-202;Mycbp2-201;Mycbp2-209;Mycbp2-208	Mycbp2;Mycbp2;Mycbp2;Mycbp2	0;0;0;0	TRUE
27281	cg13471083	-0.0000577	0.0000112	-5.137036472	0.000000495	loss	yes	0.0000855	0.0000191	4.484746388	0.0000103	pos	ns	-0.003590827	0.005585835	-0.642845087	0.520799803	neg	ns	0.283329189	0.000285894	0.000192096	1.488283245	0.137692734	pos	ns	0.844968158	Gtsf1l	Gtsf1l_Intergenic_upstream	2	163119109	163119158	163119109	163119110	50	-	CGTTCCTCAAATGGATAGTGATAGGTGATCTAAAAAATAATCTTTAAAAA	Distal Intergenic	2	163087034	163087855	822	2	Gtsf1l-201	-31303	NA	NA	NA	FALSE
27909	cg17829746	0.0000448	0.00001	4.466974488	0.0000111	gain	ns	-0.0000764	0.000017	-4.485262133	0.0000103	neg	ns	0.007445813	0.004992973	1.491258247	0.136910557	pos	ns	0.863563063	-0.000281139	0.000171708	-1.637309767	0.102580424	neg	ns	0.79674607	Prox1	Prox1_Exon	1	190161904	190161953	190161904	190161905	50	-	CGCTGGCTTGGAAACTGGGCTCCGTGCCACCATTTTTGTTCATGTTATTT	Exon (Prox1-202/Prox1, exon 2 of 5)	1	190118035	190170714	52680	2	Prox1-202	8761	Prox1-202;Prox1-201;Prox1-203	Prox1;Prox1;Prox1	0;0;0	TRUE
2803	cg03663497	-0.0000449	0.0000117	-3.832881024	0.000153364	loss	ns	0.0000893	0.0000199	4.485501135	0.0000103	pos	ns	-0.000130765	0.005834985	-0.022410558	0.982134876	neg	ns	0.007828867	0.0000246	0.000200665	0.122772598	0.902366728	pos	ns	0.798873393	Ccdc178	Ccdc178_Intron	18	21845300	21845349	21845348	21845349	50	+	AAAGCTGATGAGTAAAATATTTCTACTTCACCCAGTTTAACTCAAAACCG	Intron (Ccdc178-204/Ccdc178, intron 22 of 23)	18	21810893	22171442	360550	2	Ccdc178-204	326093	Ccdc178-204;Ccdc178-201;Ccdc178-202	Ccdc178;Ccdc178;Ccdc178	0;0;0	TRUE
26284	cg24383169	0.0000954	0.00000689	13.84200372	2.94E-34	gain	yes	-0.0000525	0.0000117	-4.482584869	0.0000104	neg	ns	0.000766017	0.003429284	0.223375116	0.823390693	pos	ns	0.084394046	-0.00022861	0.000117933	-1.938473388	0.053473043	neg	ns	0.727743829	Ralgapa2	Ralgapa2_Intron	2	146262373	146262422	146262421	146262422	50	-	GGCCTGAGTGGCCGTCTGGCGAACAGGCACTCTGACACTAAGCTGGCACG	Intron (A930019D19Rik-201/A930019D19Rik-201, intron 2 of 3)	2	146239879	146512004	272126	2	Ralgapa2-202	249582	Ralgapa2-202;Ralgapa2-211;Ralgapa2-210;Ralgapa2-203;Ralgapa2-205;Ralgapa2-208	Ralgapa2;Ralgapa2;Ralgapa2;Ralgapa2;Ralgapa2;Ralgapa2	0;0;0;-998;0;0	TRUE
23503	cg22347395	-0.0000188	0.00000788	-2.385179132	0.017671399	loss	ns	0.00006	0.0000134	4.479338553	0.0000105	pos	ns	0.008649762	0.003922001	2.205445758	0.028156508	pos	ns	1.550421204	-0.000259828	0.000134877	-1.926400703	0.054968419	neg	ns	0.874397903	Gm18441	Gm18441_Intergenic_downstream	12	118720766	118720815	118720814	118720815	50	-	TATTTTTCTTTTTTAGACTTAACCTGGATTATGTCAACACAAAATTTACG	Distal Intergenic	12	118732439	118733055	617	2	Gm18441-201	12289	NA	NA	NA	FALSE
1268	cg24690041	0.000100115	0.000016	6.248357757	1.37E-09	gain	yes	-0.000121898	0.0000272	-4.478203271	0.0000106	neg	ns	-0.0255243	0.007974611	-3.2006953	0.00151308	neg	ns	2.820138025	0.000568626	0.000274246	2.073414334	0.038959386	pos	ns	0.675366827	Zfr	Zfr_Exon	15	12149651	12149700	12149699	12149700	50	+	CTCTGCGATGTGTCTTGTACAGGAGCAGATGCGTATGCTGCCCACATTCG	Exon (Zfr-201/Zfr, exon 7 of 20)	15	12117831	12185683	67853	1	Zfr-201	31820	Zfr-201;Zfr-210;Zfr-203	Zfr;Zfr;Zfr	0;0;0	TRUE
15126	cg08662919	-0.000025	0.0000102	-2.461226902	0.014390795	loss	ns	0.0000772	0.0000173	4.475394572	0.0000107	pos	ns	0.013190521	0.005055043	2.609378702	0.009510674	pos	ns	2.021788717	-0.000193473	0.000173842	-1.112919921	0.266605065	neg	ns	0.393751919	Gm48470	Gm48470_Intergenic_downstream	13	79277995	79278044	79277995	79277996	50	-	CGTGGGGTGGTTCCTATTTCTGTCGGCAAATACAAATTTTTCACTCAGCA	Distal Intergenic	13	79441143	79441407	265	2	Gm48470-201	163412	NA	NA	NA	FALSE
4931	cg17030869	0.0000697	0.0000102	6.847934169	4.03E-11	gain	yes	-0.0000773	0.0000173	-4.473202036	0.0000108	neg	ns	0.021338663	0.005062723	4.214859363	0.0000328	pos	ns	4.483829626	-0.000851291	0.000174107	-4.889480109	0.00000163	neg	yes	0.859414432	Mkln1	Mkln1_Exon	6	31468209	31468258	31468257	31468258	50	+	TTGGATTCCTCTGTGAGGAACAGCAAATCTCTGAAAAGTGACTTCTATCG	Exon (Mkln1-201/Mkln1, exon 10 of 18)	6	31398735	31516811	118077	1	Mkln1-201	69474	Mkln1-201;Mkln1-204;Mkln1-210;Mkln1-208;Mkln1-207	Mkln1;Mkln1;Mkln1;Mkln1;Mkln1	0;0;0;0;0	TRUE
25429	cg09035645	0.00000416	0.0000109	0.381598962	0.703020279	gain	ns	0.0000828	0.0000185	4.473320727	0.0000108	pos	ns	0.001317759	0.005424032	0.242948151	0.808206235	pos	ns	0.092477804	0.000215188	0.000186532	1.153622993	0.249543418	pos	ns	0.77843457	Gm5904	Gm5904_Intergenic_upstream	7	136490830	136490879	136490830	136490831	50	-	CGCAGGAATTGGGCAGTCAGCAAGAGCCAGAGAGTGCTGGCATGTATCAT	Distal Intergenic	7	136657209	136658073	865	1	Gm5904-201	-166379	NA	NA	NA	FALSE
22716	cg22891062	-0.0000252	0.00000944	-2.668763414	0.008013811	loss	ns	0.0000717	0.000016	4.470964873	0.0000109	pos	ns	-0.004816858	0.004696552	-1.025615795	0.305872343	neg	ns	0.51445979	0.000281424	0.000161514	1.742411391	0.082428176	pos	ns	0.698831227	Meis2	Meis2_Intergenic_downstream	2	115813473	115813522	115813521	115813522	50	-	CTAAGAAAGTTCTTGACACCAGCGATTGCTTTTCAGCACCACTGCTTCCG	Distal Intergenic	2	115864227	115868867	4641	2	Meis2-219	55394	NA	NA	NA	FALSE
1796	cg25474998	-0.000000047	0.0000121	-0.003874535	0.996911068	loss	ns	0.0000922	0.0000206	4.470990441	0.0000109	pos	ns	0.014979141	0.006041155	2.479516093	0.013687295	pos	ns	1.863682381	-0.000250786	0.000207755	-1.207125499	0.228304073	neg	ns	0.819200034	Gm5513	Gm5513_Intergenic_upstream	19	15340637	15340686	15340637	15340638	50	-	CGCTTCACACACTAATTAGTTGCCTGCTCTCCACTGAGATGTCAGACCCT	Distal Intergenic	19	14959549	14960766	1218	2	Gm5513-201	-379920	NA	NA	NA	FALSE
27649	cg20925015	-0.000011	0.00000638	-1.730519613	0.084532617	loss	ns	-0.0000485	0.0000108	-4.469978248	0.000011	neg	ns	0.012452204	0.003176934	3.919566345	0.000109212	pos	ns	3.961729373	-0.000436089	0.000109255	-3.991500925	0.000082	neg	ns	0.842826929	Gm20721	Gm20721_threeUTR	2	174345243	174345292	174345243	174345244	50	+	CGTGTCCTGACTTCTGGAATCTTTGAGACCAAGTTCCAGGTGGACAAAGT	3' UTR	2	174330319	174346712	16394	2	Gm20721-201	1420	Gm20721-201;Gnas-211;Gnas-215;Gnas-201;Gnas-209;Gnas-220;Gnas-223;Gnas-224;Gnas-203;Gnas-212;Gnas-221;Gnas-202;Gnas-218;Gnas-207;Gnas-226;Gnas-208;Gnas-206;Gnas-216;Gnas-228;Gnas-225;Gnas-213	Gm20721;Gnas;Gnas;Gnas;Gnas;Gnas;Gnas;Gnas;Gnas;Gnas;Gnas;Gnas;Gnas;Gnas;Gnas;Gnas;Gnas;Gnas;Gnas;Gnas;Gnas	0;0;0;0;0;0;0;0;0;0;0;0;0;0;0;0;0;0;0;0;0	TRUE
18472	cg27029166	0.0000389	0.00000529	7.354303689	1.73E-12	gain	yes	-0.0000402	0.00000899	-4.467419866	0.0000111	neg	ns	-0.00620465	0.002633696	-2.355871543	0.019101714	neg	ns	1.718927669	-0.000083	0.0000906	-0.916197765	0.360275345	neg	ns	0.824508519	Prpf3	Prpf3_threeUTR	3	95849691	95849740	95849739	95849740	50	+	ACACCGGTGGTAGGCTTTGGGTGACATCCCCTCTTCACTAGGAGGGCTCG	3' UTR	3	95830124	95855885	25762	2	Prpf3-201	6145	Prpf3-201;Prpf3-204;Prpf3-207;Prpf3-208;Prpf3-206;Prpf3-203;Prpf3-205	Prpf3;Prpf3;Prpf3;Prpf3;Prpf3;Prpf3;Prpf3	0;0;0;-4524;-3515;0;0	TRUE
19841	cg21138313	0.0000309	0.0000108	2.869991154	0.004387024	gain	ns	0.0000816	0.0000183	4.466131074	0.0000112	pos	ns	0.022093807	0.005352718	4.127586974	0.0000472	pos	ns	4.326356568	-0.000373017	0.00018408	-2.026389602	0.043580788	neg	ns	0.61124073	Nlgn3	Nlgn3_Intron	X	101302738	101302787	101302738	101302739	50	+	CGGGAGGATGCTGGCTCCACCAGGCCCCCCTGTTGCCATTCCACCTGCTT	Intron (Gm21986-201/Gm21986-201, intron 5 of 10)	20	101299168	101325963	26796	1	Nlgn3-202	3570	Nlgn3-202;Nlgn3-203;Nlgn3-206;Nlgn3-201;Nlgn3-205	Nlgn3;Nlgn3;Nlgn3;Nlgn3;Nlgn3	0;0;0;0;0	TRUE
10064	cg05042466	-0.00000962	0.00000786	-1.223732608	0.221982412	loss	ns	0.0000596	0.0000134	4.46460874	0.0000112	pos	ns	0.004311677	0.00391162	1.102273994	0.271197594	pos	ns	0.566714167	-0.0000159	0.00013452	-0.118436712	0.905798345	neg	ns	0.360845712	Rps8-ps3	Rps8-ps3_Intergenic_downstream	6	52119366	52119415	52119414	52119415	50	-	TTGGTCTGTGCTGTGGGATGTAGCATAAATTATCTGCCTTCAGCAAAACG	Downstream (<1kb)	6	52118242	52118891	650	1	Rps8-ps3-201	1173	Rps8-ps3-201	Rps8-ps3	1124	FALSE
10678	cg25813765	0.00000366	0.0000158	0.231866906	0.816794372	gain	ns	0.000119722	0.0000268	4.464062483	0.0000113	pos	ns	0.011806739	0.007857068	1.50269011	0.133936947	pos	ns	0.873099603	0.000148061	0.000270204	0.547960399	0.584113434	pos	ns	0.506773265	Unc5a	Unc5a_Promoter	13	54948259	54948308	54948259	54948260	50	-	CGAGAGAGGGCCTCGTGTCTCAAGAAATATAGGAGAGCTCATATCTCTTT	Promoter (1-2kb)	13	54949411	55006018	56608	1	Unc5a-202	-1152	Unc5a-201;Unc5a-202	Unc5a;Unc5a	0;0	FALSE
24378	cg05916870	0.0000486	0.0000131	3.712934316	0.000242863	gain	ns	-0.0000992	0.0000222	-4.460218126	0.0000115	neg	ns	0.029022328	0.006516076	4.453957707	0.0000118	pos	ns	4.928723102	-0.000426799	0.000224087	-1.904609491	0.057756267	neg	ns	0.474229836	Chd4	Chd4_Promoter	6	125089891	125089940	125089891	125089892	50	-	CGTAACCAGTAAAACAGGCGGCCAGCTATTATGGGATGGCTGCTCCCAGC	Promoter (6-7kb)	6	125095981	125130591	34611	1	Chd4-201	-6090	NA	NA	NA	FALSE
15007	cg20212912	-0.0000437	0.0000161	-2.719770143	0.006901158	loss	ns	0.000121759	0.0000273	4.45714649	0.0000116	pos	ns	0.003091855	0.008003183	0.386328164	0.699518667	pos	ns	0.155200692	0.000108906	0.000275229	0.395694267	0.692602763	pos	ns	0.630776302	Pou4f2	Pou4f2_Promoter	8	78438837	78438886	78438837	78438838	50	-	CGGGAGACACCGCGCTTCACTGTGTAATCTGCTATGCCTCATCTGATTTG	Promoter (2-3kb)	8	78433010	78436645	3636	2	Pou4f2-201	-2241	Pou4f2-201	Pou4f2	0	FALSE
8842	cg16555117	-0.0000103	0.0000115	-0.893461921	0.372302937	loss	ns	-0.0000873	0.0000196	-4.456529263	0.0000117	neg	ns	0.029692031	0.005738102	5.174538269	0.000000411	pos	ns	6.38592169	-0.000441852	0.000197333	-2.239117912	0.025857341	neg	ns	0.846841807	Vegfa	Vegfa_Exon	17	46021035	46021084	46021035	46021036	50	-	CGAGTCTGTGTTTTTGCAGGAACATTTACACGTCTGCGGATCTTGTACAA	Exon (Vegfa-202/Vegfa, exon 6 of 7)	17	46016993	46031815	14823	2	Vegfa-201	10731	Vegfa-201;Vegfa-202;Vegfa-210;Vegfa-207;Vegfa-205;Vegfa-208;Vegfa-204;Vegfa-206;Vegfa-203;Vegfa-209	Vegfa;Vegfa;Vegfa;Vegfa;Vegfa;Vegfa;Vegfa;Vegfa;Vegfa;Vegfa	0;0;0;0;0;0;0;0;0;10272	TRUE
21679	cg17208028	0.000252403	0.0000147	17.19070299	5.51E-47	gain	yes	-0.000110972	0.0000249	-4.448898155	0.000012	neg	ns	0.009826823	0.007307646	1.344731658	0.179694949	pos	ns	0.745464129	-0.000198624	0.000251309	-0.790358327	0.429922717	neg	ns	0.488831877	Zfhx3	Zfhx3_Intron	8	108823101	108823150	108823149	108823150	50	-	GTTTGTAAATACATGAGCCACTCAAAGGCTTGTGGTTAGTGTACACTCCG	Intron (Zfhx3-204/Zfhx3, intron 9 of 15)	8	107942644	108961630	1018987	1	Zfhx3-204	880457	Zfhx3-204;Zfhx3-201	Zfhx3;Zfhx3	0;0	TRUE
26860	cg15517131	0.00000804	0.00000182	4.412391408	0.0000141	gain	ns	0.0000138	0.0000031	4.449747639	0.000012	pos	ns	0.001879826	0.000906903	2.072797575	0.03901718	pos	ns	1.408744126	0.000064	0.0000312	2.052867866	0.040924465	pos	ns	0.045558083	4930404H24Rik	4930404H24Rik_Exon	2	153492881	153492930	153492929	153492930	50	+	TCTCACACAGTAATTAGATACCAGCTGTCAGTGCAGGGGGGACGGCTCCG	Promoter (<=1kb)	2	153492790	153493841	1052	1	4930404H24Rik-201	91	4930404H24Rik-201;Nol4l-201;Nol4l-203	4930404H24Rik;Nol4l;Nol4l	0;0;0	TRUE
9287	cg02745872	0.00000514	0.00000392	1.312137961	0.190444344	gain	ns	-0.0000296	0.00000666	-4.449118678	0.000012	neg	ns	0.003896117	0.001950221	1.997782806	0.04661369	pos	ns	1.331486519	-0.0000998	0.0000671	-1.487637952	0.137862848	neg	ns	0.879802302	Foxp4	Foxp4_Intron	17	47914882	47914931	47914930	47914931	50	-	AGATTACTCCGCTTAACTACAGCATGTCCACAACACCCTTGTTAATTGCG	Intron (Foxp4-204/Foxp4, intron 1 of 16)	17	47867133	47924645	57513	2	Foxp4-204	9714	Foxp4-204;Foxp4-203;Foxp4-201;Foxp4-202;Foxp4-207	Foxp4;Foxp4;Foxp4;Foxp4;Foxp4	0;0;0;0;0	TRUE
21234	cg05176833	0.000102913	0.0000079	13.02967861	3.02E-31	gain	yes	-0.0000597	0.0000134	-4.447189289	0.0000121	neg	ns	-0.009892877	0.00393108	-2.516579729	0.012354562	neg	ns	1.908172661	0.0000825	0.00013519	0.610257453	0.542138378	pos	ns	0.774561524	Dock3	Dock3_Exon	9	106908482	106908531	106908482	106908483	50	+	CGTGGGGTGCTGGTGCCTGAACATGCAGGACTTAGCTTATCCAAACCTGG	Exon (Dock3-201/Dock3, exon 47 of 53)	9	106892825	107231909	339085	2	Dock3-201	323378	Dock3-201;Dock3-211;Dock3-204;Dock3-206	Dock3;Dock3;Dock3;Dock3	0;0;0;4925	TRUE
24056	cg20891401	0.000093	0.0000119	7.824272919	8.11E-14	gain	yes	-0.0000898	0.0000202	-4.446301044	0.0000122	neg	ns	0.04477801	0.005913644	7.571982902	4.25E-13	pos	yes	12.37157832	-0.000474863	0.00020337	-2.334972858	0.020182826	neg	ns	0.639842241	Shf	Shf_Intron	2	122354516	122354565	122354564	122354565	50	+	CTTCAGCACTGATAATATTGTTTCTTTCTCCTCCTCAGAGTTCATTACCG	Intron (Shf-201/Shf, intron 3 of 5)	2	122348892	122366828	17937	2	Shf-201	12263	Shf-201;Shf-203;Shf-208;Shf-204;Shf-210;Shf-206;Shf-205;Shf-202;Shf-209;Shf-207	Shf;Shf;Shf;Shf;Shf;Shf;Shf;Shf;Shf;Shf	0;0;0;0;0;0;0;0;0;-385	TRUE
19455	cg09189256	-0.00000245	0.00000348	-0.705344011	0.481125827	loss	ns	0.0000263	0.00000591	4.446114395	0.0000122	pos	ns	0.002202214	0.001730152	1.272844113	0.204027119	pos	ns	0.690312103	0.0000654	0.0000595	1.100002083	0.272184681	pos	ns	0.946973463	Gm12689	Gm12689_Intergenic_downstream	4	99355421	99355470	99355421	99355422	50	-	CGGTCACTTGACCTCAGATGTAACTTCTGTCGAATACCATCATTTTAACA	Distal Intergenic	4	99295900	99297258	1359	1	Gm12689-201	59570	NA	NA	NA	FALSE
22776	cg20233898	-0.0000392	0.00000601	-6.525253693	2.77E-10	loss	yes	-0.0000454	0.0000102	-4.442401146	0.0000124	neg	ns	0.009661496	0.002992768	3.228281136	0.001378775	pos	ns	2.860506623	-0.000371253	0.000102921	-3.607159003	0.00036071	neg	ns	0.83166182	Sap30bp	Sap30bp_Exon	11	115938018	115938067	115938018	115938019	50	+	CGATTCAGAGACTGAAAAACCTGAGGCTGATGACCCAAAGGTATTTGGTG	Exon (Sap30bp-203/Sap30bp, exon 3 of 11)	11	115933282	115966725	33444	1	Sap30bp-203	4736	Recql5-201;Recql5-205;Recql5-206;Recql5-203;Sap30bp-203;Sap30bp-204;Sap30bp-202;Sap30bp-201	Recql5;Recql5;Recql5;Recql5;Sap30bp;Sap30bp;Sap30bp;Sap30bp	-4541;-4541;-4541;-4541;0;0;0;0	TRUE
14569	cg21244191	0.0000232	0.0000108	2.143342638	0.032863594	gain	ns	0.0000817	0.0000184	4.442858832	0.0000124	pos	ns	0.018870592	0.005384591	3.504554384	0.000524777	pos	ns	3.2800248	-0.000434706	0.000185176	-2.347533019	0.01952682	neg	ns	0.416427924	Scrt1	Scrt1_threeUTR	15	76516473	76516522	76516473	76516474	50	+	CGGGCCCTACTTGTAGAATCAGTACAAAATAGGTGCTACCTAAACGTTCC	3' UTR	15	76516203	76522499	6297	2	Scrt1-201	5977	Dgat1-201;Dgat1-210;Dgat1-212;Dgat1-211;Dgat1-209;Scrt1-201;Scrt1-202	Dgat1;Dgat1;Dgat1;Dgat1;Dgat1;Scrt1;Scrt1	-4522;-4793;-4799;-4520;-4647;0;0	TRUE
23372	cg13989363	-0.0000228	0.0000145	-1.576615703	0.115903877	loss	ns	0.00010926	0.0000246	4.439418788	0.0000126	pos	ns	0.008755458	0.007210279	1.214302258	0.225556534	pos	ns	0.646744588	-0.0000251	0.000247961	-0.101319476	0.919362356	neg	ns	0.502078294	Sox21	Sox21_Intergenic_downstream	14	118194771	118194820	118194771	118194772	50	-	CGGATTCCTTCCAACATATGTTTTTGCCAGATAAGTAAACAGTGTGTGTC	Distal Intergenic	14	118233232	118237030	3799	2	Sox21-201	42259	NA	NA	NA	FALSE
270	cg16988131	-0.00000507	0.00000987	-0.513480812	0.607980793	loss	ns	0.0000745	0.0000168	4.438823142	0.0000126	pos	ns	0.010473585	0.004914654	2.131092911	0.03386803	pos	ns	1.470210063	-0.000138538	0.000169015	-0.819680685	0.413027916	neg	ns	0.379317408	Npas4	Npas4_threeUTR	19	4984364	4984413	4984412	4984413	50	-	CAAACTGGACTTTATTATAAAGTTGGCTACAAAGTCACCGCAGCACCACG	3' UTR	19	4984355	4989971	5617	2	Npas4-202	5558	Npas4-202;Npas4-201;Npas4-203	Npas4;Npas4;Npas4	0;0;0	TRUE
5429	cg03653137	0.00000963	0.0000202	0.475355275	0.634868528	gain	ns	-0.00015269	0.0000344	-4.438766802	0.0000126	neg	ns	0.004004062	0.010077809	0.39731478	0.69140877	pos	ns	0.160265116	-0.001845416	0.000346575	-5.324722877	0.000000195	neg	yes	0.676652257	Rgl2	Rgl2_Exon	17	33932702	33932751	33932750	33932751	50	+	TGGTGTTCCTCGCTGACCACTTGGCCGAACAGCTGACCCTGCTAGATGCG	Exon (Rgl2-201/Rgl2, exon 6 of 18)	17	33929582	33937687	8106	1	Rgl2-201	3120	Rgl2-202;Rgl2-201;Rgl2-205;Rgl2-203;Rgl2-213;Rgl2-210;Rgl2-214;Rgl2-212;Rgl2-207;Rgl2-204;Rgl2-209;Rgl2-208;Rgl2-206;Rgl2-211;Tapbp-201;Tapbp-206;Tapbp-207;Tapbp-204	Rgl2;Rgl2;Rgl2;Rgl2;Rgl2;Rgl2;Rgl2;Rgl2;Rgl2;Rgl2;Rgl2;Rgl2;Rgl2;Rgl2;Tapbp;Tapbp;Tapbp;Tapbp	3159;0;2798;2728;0;1819;0;1794;1767;0;0;0;0;0;13370;13065;12175;6584	TRUE
20787	cg18851363	0.0000911	0.0000126	7.257405902	3.19E-12	gain	yes	-0.0000946	0.0000213	-4.436817566	0.0000127	neg	ns	0.022885964	0.006247084	3.663463827	0.000292555	pos	ns	3.533792685	-0.000640843	0.000214837	-2.982932623	0.003081663	neg	ns	0.791439266	D230025D16Rik	D230025D16Rik_Exon	8	105234475	105234524	105234523	105234524	50	+	TTTGTAGTCTCCTCTAAGCCATGACCTCATTCTTAACCTGACTCAGGACG	Exon (D230025D16Rik-201/D230025D16Rik, exon 3 of 16)	8	105225145	105253053	27909	1	D230025D16Rik-201	9330	D230025D16Rik-201;D230025D16Rik-206;D230025D16Rik-205;D230025D16Rik-202;D230025D16Rik-203	D230025D16Rik;D230025D16Rik;D230025D16Rik;D230025D16Rik;D230025D16Rik	0;0;0;0;0	TRUE
5985	cg08320045	0.0000102	0.0000136	0.744133914	0.457359135	gain	ns	-0.000102874	0.0000232	-4.436851722	0.0000127	neg	ns	-0.014218397	0.006792773	-2.093165478	0.037146868	neg	ns	1.430077799	-0.000267071	0.000233603	-1.143269339	0.253808899	neg	ns	0.772707132	Ddr1	Ddr1_Exon	17	35686496	35686545	35686544	35686545	50	+	GTTTGGCCCAGGCGGGTGTGGGGGGGCCCGGGCCTCGAGGGGGACGGGCG	Exon (Ddr1-204/Ddr1, exon 12 of 18)	17	35681567	35700610	19044	2	Ddr1-204	14065	Ddr1-204;Ddr1-203;Ddr1-212;Ddr1-202;Ddr1-201;Ddr1-211;Ddr1-210;Ddr1-209;Ddr1-205;Ddr1-208;Ddr1-207	Ddr1;Ddr1;Ddr1;Ddr1;Ddr1;Ddr1;Ddr1;Ddr1;Ddr1;Ddr1;Ddr1	0;0;0;0;0;0;0;17432;18076;11426;15501	TRUE
23242	cg21648373	0.0000752	0.00000961	7.827315658	7.94E-14	gain	yes	-0.0000724	0.0000163	-4.433578435	0.0000129	neg	ns	-0.004737681	0.004783687	-0.9903828	0.322759438	neg	ns	0.491121049	0.000148806	0.000164511	0.904534795	0.366414301	pos	ns	0.493232792	Eri3	Eri3_Intron	4	117585817	117585866	117585865	117585866	50	-	CAGAGACAAGTGCTTATGTAATCAACAAACTGTCTTGGTGTCAGAATACG	Intron (Eri3-201/Eri3, intron 4 of 8)	4	117550365	117674297	123933	1	Eri3-201	35452	Eri3-201;Eri3-205;Eri3-206;Eri3-202;Eri3-204	Eri3;Eri3;Eri3;Eri3;Eri3	0;0;0;0;0	TRUE
11401	cg24785205	0.0000258	0.0000102	2.537143948	0.011666054	gain	ns	0.0000765	0.0000173	4.427392104	0.0000132	pos	ns	0.012502228	0.00506405	2.46881986	0.014094929	pos	ns	1.850937112	-0.000134786	0.000174152	-0.773953003	0.439548409	neg	ns	0.189021335	Zic3	Zic3_Promoter	X	58019020	58019069	58019068	58019069	50	-	ATATATCACACTAGCCTTTGAAAAGCGCCGCACACTATAAGGAAATAGCG	Promoter (3-4kb)	20	58022700	58031448	8749	1	Zic3-204	-3680	Zic3-204	Zic3	0	FALSE
11023	cg02860346	0.00000975	0.000019	0.512524229	0.608649145	gain	ns	0.000143156	0.0000323	4.428399437	0.0000132	pos	ns	0.037299305	0.00947064	3.938414358	0.000101358	pos	ns	3.994141131	-0.000643794	0.000325695	-1.976679051	0.048963902	neg	ns	0.331481262	Mbip	Mbip_Intergenic_downstream	12	56302137	56302186	56302137	56302138	50	+	CGGCGTGTGCCCTGACTTGATTGTAATTGCCCGAATCTGCTCCCGCTGCT	Distal Intergenic	12	56340511	56345821	5311	2	Mbip-202	43635	NA	NA	NA	FALSE
10881	cg14478165	0.000168874	0.0000143	11.80196553	8.46E-27	gain	yes	-0.000107609	0.0000243	-4.426718185	0.0000133	neg	ns	0.046064091	0.007121711	6.468121595	3.86E-10	pos	ns	9.413259921	-0.001633715	0.000244915	-6.670537955	1.17E-10	neg	yes	0.653874865	Ralgapa1	Ralgapa1_Exon	12	55722743	55722792	55722743	55722744	50	+	CGGGATGAACTGTCAATGACAGGAACTGCACCTTTGGCTCGTTCAACAGT	Exon (Ralgapa1-211/Ralgapa1, exon 17 of 40)	12	55602896	55820767	217872	2	Ralgapa1-211	97975	Ralgapa1-211;Ralgapa1-212;Ralgapa1-201;Ralgapa1-202;Ralgapa1-204;Ralgapa1-207;Ralgapa1-208	Ralgapa1;Ralgapa1;Ralgapa1;Ralgapa1;Ralgapa1;Ralgapa1;Ralgapa1	0;0;0;0;0;0;0	TRUE
25809	cg01668584	0.0000669	0.00000786	8.511716567	7.47E-16	gain	yes	-0.0000591	0.0000134	-4.426108691	0.0000133	neg	ns	-0.001855356	0.003913701	-0.474066926	0.635785907	neg	ns	0.196689103	-0.00000325	0.000134592	-0.024154599	0.980744833	neg	ns	0.198140214	Uncx	Uncx_Intergenic_downstream	5	139550489	139550538	139550537	139550538	50	+	GTTTTTGCTCTATTATGCATCCGACGCCATCATTTTTCTTTCTAATTACG	Distal Intergenic	5	139543898	139545268	1371	1	Uncx-202	6591	Uncx-201	Uncx	0	FALSE
5481	cg09937229	0.0000253	0.00000311	8.135553613	1.00E-14	gain	yes	-0.0000234	0.00000528	-4.42639928	0.0000133	neg	ns	-0.000119312	0.001546911	-0.077129071	0.938570622	neg	ns	0.027533044	-0.00000997	0.0000532	-0.187493826	0.851396122	neg	ns	0.931147773	Dnajc19	Dnajc19_Exon	3	34065021	34065070	34065021	34065022	50	-	CGCTTCAGGGGTCAGGCAGAAGATAGACAGCCAGGTAACTTGAGTGGACC	Exon (Fxr1-201/Fxr1, exon 15 of 17)	3	34056020	34081312	25293	2	Dnajc19-201	16242	Dnajc19-201;Fxr1-201;Fxr1-202;Fxr1-207;Fxr1-206;Fxr1-204;Fxr1-208	Dnajc19;Fxr1;Fxr1;Fxr1;Fxr1;Fxr1;Fxr1	0;0;0;0;0;0;0	TRUE
5103	cg16139811	-0.00000713	0.00000966	-0.738079001	0.461024801	loss	ns	0.0000727	0.0000164	4.426113876	0.0000133	pos	ns	0.02524812	0.004810263	5.248802352	0.000000285	pos	ns	6.545772175	-0.000695283	0.000165425	-4.203022686	0.0000345	neg	ns	0.215266792	Dnm1	Dnm1_Exon	2	32318525	32318574	32318573	32318574	50	-	CAGTAGTCTGCACATTGGTTAGGCTGGGCTGGGTTAGACCCTCGGCACCG	Exon (Mir199b-201/Mir199b-201, exon 1 of 1)	2	32308471	32353263	44793	2	Dnm1-204	34689	Dnm1-204;Dnm1-209;Dnm1-202;Dnm1-201;Dnm1-203;Dnm1-205;Dnm1-214;Dnm1-206;Dnm1-216;Dnm1-217;Dnm1-213	Dnm1;Dnm1;Dnm1;Dnm1;Dnm1;Dnm1;Dnm1;Dnm1;Dnm1;Dnm1;Dnm1	0;0;0;0;0;0;0;0;0;0;-1194	TRUE
26869	cg21822721	-0.0000913	0.0000184	-4.954427197	0.0000012	loss	yes	0.000138495	0.0000313	4.423770248	0.0000134	pos	ns	0.058494295	0.009171871	6.37757521	6.53E-10	pos	ns	9.185214725	-0.001045661	0.00031542	-3.315140634	0.001024655	neg	ns	0.487527617	Nol4l	Nol4l_Intergenic_upstream	2	153548253	153548302	153548253	153548254	50	-	CGTGGCTGGGACAGAACATCTGTCTGTTGCTATGGTTGCCATACACTTGA	Distal Intergenic	2	153407462	153529971	122510	2	Nol4l-201	-18331	NA	NA	NA	FALSE
5017	cg26717373	0.00000267	0.00000464	0.576371833	0.564782114	gain	ns	-0.0000348	0.00000787	-4.42501497	0.0000134	neg	ns	0.00249023	0.002307089	1.079381863	0.28125662	pos	ns	0.550897246	-0.00010144	0.0000793	-1.278544133	0.202014	neg	ns	0.862560962	Wdr33	Wdr33_Exon	18	31833690	31833739	31833690	31833691	50	-	CGTCAAGATGTTCCAGGCACATAAGGAGGCGATTAGAGAGGCCAGGTTTA	Exon (Wdr33-202/Wdr33, exon 6 of 8)	18	31804090	31841642	37553	1	Wdr33-202	29600	Wdr33-204;Wdr33-202;Wdr33-207;Wdr33-201;Wdr33-205	Wdr33;Wdr33;Wdr33;Wdr33;Wdr33	29600;0;0;0;0	TRUE
11400	cg07200166	0.0000355	0.0000119	2.979999945	0.003110478	gain	ns	0.0000894	0.0000202	4.421075911	0.0000136	pos	ns	0.032154743	0.005924406	5.42750535	0.000000115	pos	ns	6.937623373	-0.000574724	0.00020374	-2.820873008	0.005098186	neg	ns	0.29128738	Zic3	Zic3_Promoter	X	58018949	58018998	58018949	58018950	50	+	CGTGATTGACAAGAGCTTAGTTTGGTAAAGGGAAGACACGCAAGCTTTCA	Promoter (3-4kb)	20	58022700	58031448	8749	1	Zic3-204	-3702	Zic3-204	Zic3	0	FALSE
10297	cg02810163	0.000147263	0.00000992	14.84244145	5.07E-38	gain	yes	-0.0000744	0.0000169	-4.414293637	0.000014	neg	ns	-0.013346459	0.004938143	-2.702728211	0.007256348	neg	ns	2.139281889	0.000424145	0.000169822	2.497579972	0.013022594	pos	ns	0.748466459	Hibadh	Hibadh_Intron	6	52567516	52567565	52567564	52567565	50	-	AGGCGACAGCTGGGACAGAAAGCTGCTACTCAACGAACAATATAATCCCG	Intron (Hibadh-201/Hibadh, intron 4 of 7)	6	52546228	52640389	94162	2	Hibadh-201	72824	Hibadh-201;Hibadh-203	Hibadh;Hibadh	0;0	TRUE
11635	cg12054225	0.000076	0.00000935	8.125188614	1.07E-14	gain	yes	0.0000701	0.0000159	4.41461833	0.000014	pos	ns	0.024806505	0.004654364	5.32973052	0.00000019	pos	ns	6.721973167	-0.000321161	0.000160063	-2.006464856	0.045674894	neg	ns	0.620096404	Fgf13	Fgf13_fiveUTR	X	59567787	59567836	59567835	59567836	50	-	AAGGGAAATGTTTGAACATGTGATGAGCAACGTGTGAGCCTGTTACACCG	Promoter (<=1kb)	20	59250885	59567821	316937	2	Fgf13-208	0	Fgf13-203;Fgf13-205;Fgf13-206;Fgf13-208;Fgf13-209	Fgf13;Fgf13;Fgf13;Fgf13;Fgf13	0;0;0;0;0	TRUE
2627	cg08170671	0.00000777	0.00000599	1.29840973	0.19511166	gain	ns	-0.0000449	0.0000102	-4.414344767	0.000014	neg	ns	-0.012436645	0.002978857	-4.174972416	0.0000388	neg	ns	4.41153	0.000202521	0.000102443	1.976916979	0.048936858	pos	ns	0.885592841	Camk2g	Camk2g_threeUTR	14	20736640	20736689	20736688	20736689	50	-	TTTTTTTTCTTAAATGTAAAAAACACCTCGGTACAGCAGAGACAGACACG	3' UTR	14	20734875	20794051	59177	2	Camk2g-203	57362	Camk2g-203;Camk2g-201;Camk2g-202;Camk2g-205;Camk2g-217;Camk2g-210;Camk2g-209;Camk2g-204;Camk2g-212;Camk2g-211;Ndst2-202	Camk2g;Camk2g;Camk2g;Camk2g;Camk2g;Camk2g;Camk2g;Camk2g;Camk2g;Camk2g;Ndst2	0;0;0;0;0;0;0;0;0;0;0	TRUE
15251	cg21636615	-0.0000149	0.0000125	-1.189666667	0.235087783	loss	ns	0.0000938	0.0000213	4.408642618	0.0000144	pos	ns	0.009930337	0.006236508	1.592291162	0.112338427	pos	ns	0.949471662	-0.000163817	0.000214473	-0.763812577	0.445559877	neg	ns	0.841783545	Gm5197	Gm5197_Intron	13	80000551	80000600	80000599	80000600	50	-	AAGCCCCCAACTGAATTGTTTTTTTCCTTCATAGTCTAAAAAGCACAGCG	Intron (Gm28526-201/Gm28526-201, intron 1 of 2)	13	80098222	80099418	1197	2	Gm5197-201	98867	NA	NA	NA	TRUE
18373	cg13505793	-0.000015	0.0000138	-1.090219331	0.27646324	loss	ns	0.000102984	0.0000234	4.407347325	0.0000144	pos	ns	0.009285072	0.006845574	1.356361435	0.175971216	pos	ns	0.754558366	-0.000115104	0.000235419	-0.48893207	0.625235516	neg	ns	0.34886963	Otp	Otp_Intron	13	94880284	94880333	94880332	94880333	50	+	CACTATTAAACTGTAATGAATTCGGCCCAGAGTTCACGGCTGGCTGATCG	Intron (Otp-201/Otp, intron 2 of 2)	13	94875602	94885130	9529	1	Otp-201	4682	Otp-201;Otp-202	Otp;Otp	0;-2267	TRUE
10760	cg17352520	0.0000213	0.00000748	2.850167334	0.0046624	gain	ns	0.000056	0.0000127	4.405461683	0.0000146	pos	ns	0.018876303	0.00372226	5.071194518	0.000000682	pos	ns	6.166433143	-0.000375255	0.000128008	-2.931494979	0.003624286	neg	ns	0.418594211	Ube2q2	Ube2q2_Exon	9	55149649	55149698	55149697	55149698	50	+	GCTCAAGGCCGAGCTGAAGTTCCTGGCGTCCATCTTCGACAAGAACCACG	Promoter (<=1kb)	9	55148854	55207529	58676	1	Ube2q2-201	795	Ube2q2-201;Ube2q2-202;Ube2q2-203	Ube2q2;Ube2q2;Ube2q2	0;0;-385	TRUE
8777	cg06360155	-0.0000268	0.0000116	-2.298004694	0.02222705	loss	ns	0.0000871	0.0000198	4.404411198	0.0000146	pos	ns	0.012506304	0.005794802	2.158193302	0.031680351	pos	ns	1.499210019	-0.000205964	0.000199283	-1.033526305	0.302163264	neg	ns	0.326494292	Fgf8	Fgf8_Intron	19	45740448	45740497	45740448	45740449	50	+	CGATCCCCCAAACTGGCTCAAGAAGAGGAGAAAGTATTCAGGAAATGTTA	Intron (Fgf8-201/Fgf8, intron 4 of 5)	19	45736798	45742874	6077	2	Fgf8-201	2377	Fgf8-201;Fgf8-206;Fgf8-202;Fgf8-205;Fgf8-203;Fgf8-204	Fgf8;Fgf8;Fgf8;Fgf8;Fgf8;Fgf8	0;0;0;0;0;0	TRUE
21936	cg12483863	0.00000754	0.00000544	1.386146147	0.166698485	gain	ns	-0.0000407	0.00000924	-4.404670622	0.0000146	neg	ns	-0.011027548	0.002707811	-4.072495557	0.0000591	neg	ns	4.228315168	0.000449044	0.0000931	4.822131573	0.00000223	pos	ns	0.884159133	Faf1	Faf1_Intron	4	109763217	109763266	109763217	109763218	50	-	CGTTATTTTTGGGGAGGGTGGATGTATGAAAAGCCAATTGGAGTTTTTTT	Intron (Faf1-201/Faf1, intron 7 of 18)	4	109676588	109963960	287373	1	Faf1-201	86629	Faf1-201	Faf1	0	TRUE
18125	cg02019798	0.0000849	0.0000106	8.003848534	2.44E-14	gain	yes	-0.0000794	0.000018	-4.40354954	0.0000147	neg	ns	0.024292691	0.005282194	4.59897721	0.00000619	pos	ns	5.20807434	-0.000769686	0.000181654	-4.237093447	0.0000299	neg	ns	0.703881942	Spag9	Spag9_fiveUTR	11	94044361	94044410	94044361	94044362	50	-	CGCCATGAGTCCTGGATGCATGCTGCTGTTTGTGTTTGGCTTTGTTGGCG	Promoter (<=1kb)	11	94044365	94126083	81719	1	Spag9-201	0	Spag9-209;Spag9-208;Spag9-202;Spag9-212;Spag9-207;Spag9-206;Spag9-203;Spag9-204;Spag9-205;Spag9-201	Spag9;Spag9;Spag9;Spag9;Spag9;Spag9;Spag9;Spag9;Spag9;Spag9	0;0;0;0;0;0;0;0;0;0	TRUE
19491	cg18929422	-0.0000178	0.0000112	-1.592952249	0.112189991	loss	ns	0.0000835	0.000019	4.403763955	0.0000147	pos	ns	-0.0000519	0.005557231	-0.009347524	0.992547876	neg	ns	0.003248536	0.000199824	0.000191113	1.045582571	0.296568394	pos	ns	0.705306929	Pja1	Pja1_Intergenic_downstream	X	99443802	99443851	99443850	99443851	50	-	TCATTTCCTGTGGCCTAAAGTACTTATTTGCAAGTTGTAAGGACTGCCCG	Distal Intergenic	20	99466146	99470672	4527	2	Pja1-204	26870	NA	NA	NA	FALSE
18407	cg15393941	0.0000744	0.0000124	6.015337048	5.05E-09	gain	yes	-0.0000924	0.000021	-4.398075302	0.000015	neg	ns	-0.010815313	0.006156394	-1.756760955	0.079945821	neg	ns	1.097204233	0.000105452	0.000211718	0.498079794	0.618780963	pos	ns	0.44556929	Jun	Jun_Exon	4	95197453	95197502	95197501	95197502	50	+	TGTTCCCCAAAGTTGCTAAAAATGCCTGCGGGTTTGCACACAAGCAGACG	Exon (Gm12708-201/Gm12708-201, exon 3 of 4)	4	95049034	95052222	3189	2	Jun-201	-145231	NA	NA	NA	TRUE
14744	cg01252899	0.000025	0.00000867	2.886036705	0.004175072	gain	ns	0.0000648	0.0000147	4.398110361	0.000015	pos	ns	0.019968392	0.004313416	4.62936841	0.0000054	pos	ns	5.267518244	-0.000475836	0.000148338	-3.207781401	0.00147747	neg	ns	0.179746846	Tbl1x	Tbl1x_Promoter	X	77509313	77509362	77509361	77509362	50	-	CGAAAGGAGAATCAATCAACCACAATGTGACCCTACAGGCGGAAAAAACG	Promoter (1-2kb)	20	77511013	77662983	151971	1	Tbl1x-201	-1700	Tbl1x-201;Tbl1x-202	Tbl1x;Tbl1x	-1651;-1852	FALSE
14350	cg14443857	-0.0000783	0.00000744	-10.52251993	2.42E-22	loss	yes	-0.0000556	0.0000126	-4.394994269	0.0000152	neg	ns	0.008601454	0.003704081	2.322155748	0.020872093	pos	ns	1.680433997	-0.000959336	0.000127383	-7.531111279	5.54E-13	neg	yes	0.771689748	Specc1l	Specc1l_Exon	10	75246641	75246690	75246689	75246690	50	+	GCTAGTAGCTTGCAGGAAGATCTGGCTCATACCCGAAATGATGCCAATCG	Exon (Specc1l-204/Specc1l, exon 4 of 16)	10	75212073	75311063	98991	1	Specc1l-204	34568	Specc1l-204;Specc1l-205;Specc1l-202;Specc1l-206;Specc1l-201	Specc1l;Specc1l;Specc1l;Specc1l;Specc1l	0;34546;0;34221;0	TRUE
4696	cg24324866	0.0000597	0.00000725	8.226929911	5.36E-15	gain	yes	-0.0000541	0.0000123	-4.394855146	0.0000152	neg	ns	0.01280583	0.003609645	3.547669905	0.000448764	pos	ns	3.347981598	-0.00029233	0.000124135	-2.354928518	0.019149379	neg	ns	0.787786284	Tbc1d13	Tbc1d13_threeUTR	2	30136648	30136697	30136696	30136697	50	+	TGACCTTTGCCTGCTGTGTCCACAGGCATCCCCTGTGAGGGCGGACTGCG	3' UTR	2	30133746	30137296	3551	1	Tbc1d13-207	2902	Tbc1d13-207;Tbc1d13-201;Tbc1d13-208;Tbc1d13-202;Tbc1d13-204;Tbc1d13-206;Tbc1d13-203	Tbc1d13;Tbc1d13;Tbc1d13;Tbc1d13;Tbc1d13;Tbc1d13;Tbc1d13	0;0;2876;0;0;0;-333	TRUE
27480	cg07369538	0.0000786	0.00000463	16.9574139	4.32E-46	gain	yes	-0.0000346	0.00000787	-4.391899851	0.0000154	neg	ns	-0.009790245	0.002306708	-4.244250432	0.000029	neg	ns	4.537456958	0.000377414	0.0000793	4.757671854	0.00000301	pos	ns	0.798446812	Pbx1	Pbx1_Intron	1	168342111	168342160	168342111	168342112	50	-	CGCGAGATGAAATAAACATGAGGACTGTCAGCAGTGACAGCCTAAGCAAA	Intron (Pbx1-208/Pbx1, intron 2 of 7)	1	168119364	168432270	312907	2	Pbx1-208	90110	Pbx1-208;Pbx1-205;Pbx1-206;Pbx1-201;Pbx1-202;Pbx1-204	Pbx1;Pbx1;Pbx1;Pbx1;Pbx1;Pbx1	0;0;0;0;0;0	TRUE
19642	cg01325609	-0.00000547	0.00000742	-0.737309414	0.461491891	loss	ns	0.0000553	0.0000126	4.389235229	0.0000156	pos	ns	0.002425735	0.003692837	0.656875595	0.511748259	pos	ns	0.290943626	0.000182073	0.000126996	1.433683211	0.152670522	pos	ns	0.912039093	Gm28267	Gm28267_Intergenic_upstream	9	100252491	100252540	100252539	100252540	50	-	CTTTTAATGGCATTATAATTTTTTTCCCTGTGCGCTCCATAACTGCGTCG	Distal Intergenic	9	100404495	100404759	265	1	Gm28267-201	-152004	NA	NA	NA	FALSE
12873	cg19155816	-0.000162506	0.000014	-11.64471521	3.06E-26	loss	yes	0.000103984	0.0000237	4.386006379	0.0000158	pos	ns	0.014010875	0.006945706	2.017199474	0.04453633	pos	ns	1.351285574	-0.000454814	0.000238862	-1.904084059	0.05782492	neg	ns	0.409506014	Gm47010	Gm47010_Intergenic_upstream	14	67613273	67613322	67613321	67613322	50	-	CACAATCAACTGCTATTTTCATTGTTCTTTGGCAAATTTATACACAGTCG	Distal Intergenic	14	67588363	67588792	430	2	Gm47010-201	-24530	NA	NA	NA	FALSE
15236	cg14245610	-0.0000225	0.0000115	-1.951589897	0.05188722	loss	ns	-0.0000858	0.0000196	-4.385662421	0.0000159	neg	ns	0.022274815	0.00573233	3.885822418	0.000124734	pos	ns	3.904014975	-0.000429483	0.000197134	-2.178628963	0.030112246	neg	ns	0.719588946	Plppr3	Plppr3_Exon	10	79861747	79861796	79861747	79861748	50	+	CGGAATTTCTTTGCCAACTGACTGCACGGTACTTCTGCTTCCTGTTGTTG	Exon (Ptbp1-204/Ptbp1, exon 1 of 4)	10	79860475	79874570	14096	2	Plppr3-207	12774	Plppr3-207;Plppr3-202;Plppr3-206;Plppr3-201;Plppr3-210;Plppr3-209;Plppr3-204;Ptbp1-216;Ptbp1-210;Ptbp1-206;Ptbp1-205;Ptbp1-203;Ptbp1-201;Ptbp1-215;Ptbp1-208;Ptbp1-212;Ptbp1-202;Ptbp1-209;Ptbp1-211;Ptbp1-214;Ptbp1-207;Ptbp1-204;Ptbp1-213	Plppr3;Plppr3;Plppr3;Plppr3;Plppr3;Plppr3;Plppr3;Ptbp1;Ptbp1;Ptbp1;Ptbp1;Ptbp1;Ptbp1;Ptbp1;Ptbp1;Ptbp1;Ptbp1;Ptbp1;Ptbp1;Ptbp1;Ptbp1;Ptbp1;Ptbp1	0;12570;12774;12838;5485;12428;12612;0;7142;0;0;7106;0;7082;7080;7080;0;6709;2975;2753;0;0;-221	TRUE
17820	cg12777332	-0.00000786	0.00000582	-1.349563922	0.178140624	loss	ns	0.0000434	0.00000989	4.383435738	0.000016	pos	ns	-0.000396187	0.002898029	-0.136709159	0.89134943	neg	ns	0.049952009	0.0000945	0.0000997	0.948026898	0.343854189	pos	ns	0.842306214	Irx3	Irx3_Intergenic_upstream	8	91864228	91864277	91864228	91864229	50	-	CGGCTTTGATTTGTTGAGCTCCCTGAATGAGTTTATCCAAACAATGTGAA	Distal Intergenic	8	91798525	91802067	3543	2	Irx3-202	-62210	NA	NA	NA	FALSE
17498	cg04314650	0.0000078	0.00000954	0.817559619	0.414236602	gain	ns	0.0000711	0.0000162	4.383938836	0.000016	pos	ns	0.018861618	0.004750145	3.970746193	0.0000891	pos	ns	4.050031505	-0.000200242	0.000163357	-1.225795514	0.221206029	neg	ns	0.830710529	Chtop	Chtop_fiveUTR	3	90507541	90507590	90507589	90507590	50	+	TCACCGCTCATTTAGAGACATCTTGGTGGTGCTTTTTAGCACAACTTTCG	5' UTR	3	90498956	90509450	10495	2	Chtop-205	1860	Chtop-205;Chtop-201;Chtop-206;Chtop-203;Chtop-202;Chtop-207;Chtop-204;Chtop-209;Chtop-208;S100a1-201;S100a1-202	Chtop;Chtop;Chtop;Chtop;Chtop;Chtop;Chtop;Chtop;Chtop;S100a1;S100a1	0;0;0;0;0;0;0;0;0;6802;6688	TRUE
15145	cg14433164	0.0000434	0.0000047	9.234082648	4.24E-18	gain	yes	-0.000035	0.00000798	-4.379043272	0.0000163	neg	ns	-0.003082272	0.00233829	-1.318173474	0.188418739	neg	ns	0.724875907	0.000178119	0.0000804	2.215033819	0.027484454	pos	ns	0.866374902	Fanci	Fanci_threeUTR	7	79449980	79450029	79449980	79449981	50	+	CGTTTTTCCAAGGAGCCTTTGGTGAGTTCAATTATCTGGTAAATATCCAG	3' UTR	7	79392312	79450264	57953	1	Fanci-201	57668	Fanci-201;Fanci-204;Fanci-207;Polg-201;Polg-217;Polg-206;Polg-214;Polg-203;Polg-213;Polg-205;Polg-212;Polg-218;Polg-215;Polg-209;Polg-207;Polg-204	Fanci;Fanci;Fanci;Polg;Polg;Polg;Polg;Polg;Polg;Polg;Polg;Polg;Polg;Polg;Polg;Polg	0;0;9312;0;0;0;0;0;0;0;2051;1893;3757;4311;6036;5365	TRUE
2562	cg25479924	-0.00000661	0.0000162	-0.408197148	0.683410739	loss	ns	-0.000120481	0.0000275	-4.379466316	0.0000163	neg	ns	-0.015468025	0.008059639	-1.919195855	0.055877422	neg	ns	1.252763636	0.000444311	0.00027717	1.603025905	0.109947301	pos	ns	0.609868187	Pde7b	Pde7b_Intron	10	20534042	20534091	20534042	20534043	50	+	CGTCAAAAGAATTAGGCTAGAAATCTTATGATTACAGCTTTTCTTGTGAT	Intron (Pde7b-201/Pde7b, intron 2 of 12)	10	20398004	20725078	327075	2	Pde7b-201	190987	Pde7b-201;Pde7b-204;Pde7b-205;Pde7b-206;Pde7b-202;Pde7b-207	Pde7b;Pde7b;Pde7b;Pde7b;Pde7b;Pde7b	0;0;0;0;0;0	TRUE
19641	cg16187601	-0.00000604	0.0000047	-1.285782187	0.199478699	loss	ns	0.000035	0.00000799	4.376928851	0.0000165	pos	ns	0.000307165	0.002339535	0.131293268	0.895628482	pos	ns	0.047872104	0.000151735	0.0000805	1.88592926	0.060239218	pos	ns	0.956099139	Gm28267	Gm28267_Intergenic_upstream	9	100252488	100252537	100252536	100252537	50	-	TAACTTTTAATGGCATTATAATTTTTTTCCCTGTGCGCTCCATAACTGCG	Distal Intergenic	9	100404495	100404759	265	1	Gm28267-201	-152007	NA	NA	NA	FALSE
26486	cg04952455	-0.00000957	0.00000687	-1.392068844	0.164899409	loss	ns	0.0000511	0.0000117	4.375488205	0.0000166	pos	ns	0.002557127	0.003421355	0.747401869	0.455387557	pos	ns	0.341618841	-0.000130196	0.00011766	-1.106545574	0.269348384	neg	ns	0.886463033	Casz1	Casz1_Intergenic_upstream	4	148778267	148778316	148778267	148778268	50	+	CGGAGAATCATTAGCAGAAATCATTAGCTAGAATACAGCCTCCCCCATAA	Distal Intergenic	4	148804429	148945129	140701	1	Casz1-201	-26113	NA	NA	NA	FALSE
25241	cg08277008	0.000229041	0.0000142	16.12430799	6.70E-43	gain	yes	-0.000105533	0.0000241	-4.373204543	0.0000167	neg	ns	-0.009490731	0.007069812	-1.342430602	0.180438648	neg	ns	0.743670436	0.000238127	0.00024313	0.97942241	0.328135029	pos	ns	0.581165934	Etv6	Etv6_Intron	6	134144362	134144411	134144362	134144363	50	+	CGATGCAGGCAGACGTTAATTCCTAGCTCCATGCTTCCTGATAAGGAAGC	Intron (Etv6-201/Etv6, intron 2 of 7)	6	134035700	134270155	234456	1	Etv6-201	108662	Etv6-201;Etv6-202;Etv6-204	Etv6;Etv6;Etv6	0;0;0	TRUE
4234	cg17226346	0.0000258	0.00000492	5.247668511	0.000000286	gain	yes	-0.0000366	0.00000836	-4.373630706	0.0000167	neg	ns	0.006429327	0.002449661	2.624578435	0.009105404	pos	ns	2.040700774	-0.000275535	0.0000842	-3.270691502	0.001193688	neg	ns	0.902173137	Ilrun	Ilrun_Exon	17	27786227	27786276	27786227	27786228	50	+	CGACATATTTAAGACAAACCCCTGGAGGCCAGGCCTCTGCCCCTGAGTTC	Exon (Ilrun-203/Ilrun, exon 3 of 5)	17	27751235	27820625	69391	2	Ilrun-203	34349	Ilrun-203;Ilrun-202;Ilrun-205;Ilrun-206;Ilrun-207;Ilrun-201;Ilrun-204;Rps2-ps9-202;Rps2-ps9-201	Ilrun;Ilrun;Ilrun;Ilrun;Ilrun;Ilrun;Ilrun;Rps2-ps9;Rps2-ps9	0;0;0;0;0;0;0;1848;1803	TRUE
17849	cg21408215	0.000014	0.00000307	4.58054243	0.00000673	gain	ns	-0.0000228	0.00000521	-4.37182602	0.0000168	neg	ns	0.001237805	0.001526604	0.810822631	0.418089581	pos	ns	0.378730655	-0.0000767	0.0000525	-1.460349754	0.145206682	neg	ns	0.924207715	Gm49711	Gm49711_Exon	16	92078065	92078114	92078113	92078114	50	+	ATGCTGGTGTGTGGAAGCAGAGCTGGTTGCTCCAATATTGCTTACCCACG	Exon (Slc5a3-201/Slc5a3, exon 2 of 2)	16	92058316	92187341	129026	1	Gm49711-201	19749	Gm49711-201;Mrps6-201;Mrps6-203;Slc5a3-201;Slc5a3-202	Gm49711;Mrps6;Mrps6;Slc5a3;Slc5a3	0;0;0;0;0	TRUE
6095	cg11217865	0.00000781	0.0000161	0.486057636	0.6272697	gain	ns	0.000119312	0.0000273	4.369245249	0.000017	pos	ns	0.008635672	0.008000094	1.079446279	0.281227963	pos	ns	0.550941499	-0.000196033	0.000275123	-0.712530796	0.476672095	neg	ns	0.695973617	Nrg2	Nrg2_threeUTR	18	36017689	36017738	36017737	36017738	50	+	AAATCAGGATGTTACATATAAATAGTTTCCCTATAAAAACGCCTTTGCCG	3' UTR	18	36017652	36197380	179729	2	Nrg2-203	179642	Nrg2-203;Nrg2-206;Nrg2-202;Nrg2-205;Psd2-201;Psd2-205;Psd2-206;Psd2-204;Psd2-203	Nrg2;Nrg2;Nrg2;Nrg2;Psd2;Psd2;Psd2;Psd2;Psd2	0;0;0;0;0;0;0;0;0	TRUE
18131	cg16652705	0.0000153	0.0000113	1.354740873	0.176486608	gain	ns	0.0000836	0.0000191	4.367812961	0.0000171	pos	ns	0.019494446	0.005610173	3.474838538	0.000584013	pos	ns	3.233577422	-0.000439192	0.000192933	-2.276391779	0.023504152	neg	ns	0.545646177	Zfx	Zfx_fiveUTR	X	94123096	94123145	94123144	94123145	50	-	TGGCGGGTGCTGCAGGCCGGCCTTTCTCTGGAGCACTGGGCCGGGCTCCG	Promoter (<=1kb)	20	94098174	94123109	24936	2	Zfx-202	0	Zfx-201;Zfx-203;Zfx-204;Zfx-207;Zfx-202;Zfx-206;Zfx-205	Zfx;Zfx;Zfx;Zfx;Zfx;Zfx;Zfx	0;-196;0;0;0;0;0	TRUE
275	cg02859575	0.0000197	0.0000132	1.488759241	0.137567355	gain	ns	0.0000981	0.0000225	4.363364525	0.0000175	pos	ns	0.014954546	0.006586868	2.270357478	0.023871954	pos	ns	1.622112035	-0.000161784	0.000226522	-0.714207111	0.475636537	neg	ns	0.821857021	Npas4	Npas4_threeUTR	19	4985010	4985059	4985010	4985011	50	+	CGGCTCCACGTCTTGATGACAATATGCCATACTTGACGACGTTAAGTCAC	3' UTR	19	4984355	4989971	5617	2	Npas4-202	4912	Npas4-202;Npas4-201;Npas4-203	Npas4;Npas4;Npas4	0;0;0	TRUE
8456	cg22976699	0.00000879	0.0000108	0.810123191	0.418490813	gain	ns	-0.0000803	0.0000184	-4.358319388	0.0000178	neg	ns	0.00281707	0.005399193	0.521757542	0.602211733	pos	ns	0.220250788	-0.000363786	0.000185678	-1.959231764	0.050981659	neg	ns	0.767168091	Zeb2	Zeb2_Intergenic_upstream	2	45170401	45170450	45170449	45170450	50	+	ATTAGTGTACCTTGCCAGTTATTAACATCCCCGGGTGCTCAGCAAGCACG	Distal Intergenic	2	45116441	45117395	955	2	Zeb2-230	-53006	NA	NA	NA	FALSE
11461	cg20980840	0.0000278	0.0000165	1.684361874	0.093118251	gain	ns	-0.00012215	0.000028	-4.357147737	0.0000179	neg	ns	0.055963047	0.008213101	6.813875362	4.95E-11	pos	yes	10.30508227	-0.00188689	0.000282448	-6.680487907	1.10E-10	neg	yes	0.765382368	Hnrnpk	Hnrnpk_fiveUTR	13	58397769	58397818	58397817	58397818	50	+	TGTCTGGGACTGAAACACTGGCATTGTACTGCATTGGTCATTGGCGTTCG	5' UTR	13	58391142	58403343	12202	2	Hnrnpk-202	5525	Hnrnpk-202;Hnrnpk-224;Hnrnpk-221;Hnrnpk-232;Hnrnpk-216;Hnrnpk-201;Hnrnpk-205;Hnrnpk-217;Hnrnpk-206;Hnrnpk-209;Hnrnpk-213;Hnrnpk-227;Hnrnpk-234;Hnrnpk-233;Hnrnpk-228;Hnrnpk-214;Hnrnpk-215;Hnrnpk-211;Hnrnpk-208;Hnrnpk-212;Hnrnpk-231;Hnrnpk-230;Hnrnpk-203;Hnrnpk-218;Hnrnpk-226;Hnrnpk-207;Hnrnpk-219;Hnrnpk-225;Hnrnpk-229;Hnrnpk-223;Hnrnpk-220;Hnrnpk-210;Hnrnpk-204;Hnrnpk-222;Rmi1-205;Rmi1-201;Rmi1-204	Hnrnpk;Hnrnpk;Hnrnpk;Hnrnpk;Hnrnpk;Hnrnpk;Hnrnpk;Hnrnpk;Hnrnpk;Hnrnpk;Hnrnpk;Hnrnpk;Hnrnpk;Hnrnpk;Hnrnpk;Hnrnpk;Hnrnpk;Hnrnpk;Hnrnpk;Hnrnpk;Hnrnpk;Hnrnpk;Hnrnpk;Hnrnpk;Hnrnpk;Hnrnpk;Hnrnpk;Hnrnpk;Hnrnpk;Hnrnpk;Hnrnpk;Hnrnpk;Hnrnpk;Hnrnpk;Rmi1;Rmi1;Rmi1	0;0;0;0;0;0;0;-3901;-2984;-3794;-2571;-3685;-3880;-3599;-3073;0;-2049;0;0;0;0;0;0;0;0;0;0;0;0;0;0;0;4684;4237;-4430;-4445;-4882	TRUE
6285	cg18957179	0.0000889	0.00002	4.453108891	0.0000118	gain	ns	-0.000147726	0.0000339	-4.355994329	0.000018	neg	ns	0.028582029	0.009935429	2.876778453	0.0042962	pos	ns	2.366915506	0.001289022	0.000341679	3.772615457	0.000193494	pos	ns	0.38175567	Nrn1	Nrn1_fiveUTR	13	36730148	36730197	36730148	36730149	50	+	CGGGTAGTTGGCCATGCTGTCGCCCAGCTTGAGCAAACAGTCCGAAAAGC	Promoter (<=1kb)	13	36725361	36730680	5320	2	Nrn1-204	483	Fars2-211;Nrn1-204;Nrn1-201;Nrn1-203;Nrn1-202;Nrn1-205	Fars2;Nrn1;Nrn1;Nrn1;Nrn1;Nrn1	8222;0;0;0;0;0	TRUE
25892	cg10921475	0.00000117	0.0000189	0.06196363	0.950631727	gain	ns	0.000140107	0.0000322	4.35476728	0.0000181	pos	ns	0.02804233	0.009425693	2.975094693	0.003159227	pos	ns	2.500419219	-0.000742476	0.000324149	-2.290540099	0.022661105	neg	ns	0.832811236	Frmpd3	Frmpd3_Exon	X	140433292	140433341	140433340	140433341	50	+	GTGCTGAGCAGCCTCATTGAGACCTTCGTGCGGCTGGTGTTCATTGTGCG	Exon (Frmpd3-203/Frmpd3, exon 15 of 15)	20	140342263	140435467	93205	1	Frmpd3-203	91029	Frmpd3-203	Frmpd3	0	TRUE
21968	cg24720513	0.000140524	0.0000104	13.51380592	4.90E-33	gain	yes	-0.0000769	0.0000177	-4.35170705	0.0000184	neg	ns	0.012546017	0.005175471	2.424130501	0.015916833	pos	ns	1.798143337	-0.000284321	0.000177984	-1.597453718	0.111183393	neg	ns	0.812198547	Ap1g1	Ap1g1_Exon	8	109855584	109855633	109855632	109855633	50	-	ATCACAGCATACAGTAAGAATGGCTTGAAGATAGAATTCACCTTTGAACG	Exon (Ap1g1-202/Ap1g1, exon 22 of 24)	8	109778554	109864204	85651	1	Ap1g1-202	77030	Ap1g1-202;Ap1g1-201;Ap1g1-205	Ap1g1;Ap1g1;Ap1g1	0;0;0	TRUE
27667	cg19163499	-0.0000404	0.0000121	-3.35078562	0.000905486	loss	ns	-0.000089	0.0000205	-4.349427748	0.0000185	neg	ns	0.013496722	0.005998091	2.250169777	0.025139135	pos	ns	1.599649665	-0.0000838	0.000206274	-0.406217317	0.6848632	neg	ns	0.745957689	Sdccag8	Sdccag8_Intron	1	176946454	176946503	176946502	176946503	50	-	TCTGTTGCACCATCTGGATTATGAGTTTATTTACCTGTGTTCAAGAAACG	Intron (Sdccag8-204/Sdccag8, intron 15 of 16)	1	176814660	176956360	141701	1	Sdccag8-204	131794	Sdccag8-204;Sdccag8-201;Sdccag8-203	Sdccag8;Sdccag8;Sdccag8	0;0;0	TRUE
21314	cg22351690	0.0000944	0.0000141	6.690550123	1.04E-10	gain	yes	-0.000104229	0.000024	-4.348705227	0.0000186	neg	ns	0.012683887	0.007021761	1.806368322	0.071830511	pos	ns	1.143691042	-0.000169273	0.000241478	-0.700989316	0.483835519	neg	ns	0.738966726	Nfat5	Nfat5_Intron	8	107332093	107332142	107332141	107332142	50	-	TTAATACACTTAACTTGCATTCTAGCTTCGCCATTCAGAGACAGGCATCG	Intron (Nfat5-213/Nfat5, intron 2 of 14)	8	107293470	107372227	78758	1	Nfat5-213	38623	Nfat5-212;Nfat5-213;Nfat5-214;Nfat5-206;Nfat5-210;Nfat5-211;Nfat5-203;Nfat5-201	Nfat5;Nfat5;Nfat5;Nfat5;Nfat5;Nfat5;Nfat5;Nfat5	0;0;0;0;0;0;0;0	TRUE
15533	cg25356922	0.00000362	0.00000335	1.080415933	0.280796823	gain	ns	-0.0000247	0.00000569	-4.34771742	0.0000187	neg	ns	-0.003967206	0.001667693	-2.378858291	0.017971642	neg	ns	1.745412241	-0.0000285	0.0000574	-0.497628145	0.619098956	neg	ns	0.835561288	Ep300	Ep300_Exon	15	81633936	81633985	81633936	81633937	50	-	CGTTGCTTGGCTTGGGCTGTGTTGTGTGAACGGAACAGTTCACCCCAGTA	Promoter (<=1kb)	15	81633979	81640529	6551	1	Ep300-207	0	Ep300-201;Ep300-207;Ep300-204	Ep300;Ep300;Ep300	0;0;-2163	TRUE
17221	cg05694277	0.00000904	0.00000886	1.020338887	0.308363376	gain	ns	0.0000655	0.0000151	4.347367649	0.0000187	pos	ns	0.016201717	0.004411237	3.672828792	0.000282468	pos	ns	3.549030141	-0.000336946	0.000151702	-2.221103865	0.027066213	neg	ns	0.796421638	Nrxn3	Nrxn3_Exon	12	89260409	89260458	89260457	89260458	50	+	CAAGCAGTGTGACAGCTACCCCTGCAAGAATAATGCTGTGTGCAAGGACG	Exon (Nrxn3-209/Nrxn3, exon 8 of 8)	12	88722876	89261571	538696	1	Nrxn3-209	537533	Nrxn3-209;Nrxn3-213;Nrxn3-208;Nrxn3-205;Nrxn3-201;Nrxn3-210	Nrxn3;Nrxn3;Nrxn3;Nrxn3;Nrxn3;Nrxn3	0;0;0;0;0;0	TRUE
26085	cg07239853	-0.00000771	0.00000429	-1.797785319	0.073184003	loss	ns	0.0000317	0.00000729	4.345322081	0.0000189	pos	ns	0.004364825	0.002134469	2.044923051	0.041706625	pos	ns	1.379794955	-0.000203376	0.0000734	-2.770631112	0.005932481	neg	ns	0.903403958	Gm2505	Gm2505_Intron	3	143790415	143790464	143790463	143790464	50	-	TAGTAAATGGCCTCAAAGCAATAATTACCAGTGTAGGTGTGTCAGAAGCG	Intron (Gm42705-201/Gm42705-201, intron 1 of 5)	3	143872995	143873819	825	1	Gm2505-201	-82580	NA	NA	NA	TRUE
170	cg04613586	0.000122664	0.0000119	10.2874519	1.51E-21	gain	yes	-0.000088	0.0000203	-4.341903737	0.0000192	neg	ns	0.034935097	0.005934539	5.886741484	1.02E-08	pos	ns	7.990243357	-0.000798162	0.000204088	-3.910866594	0.000113029	neg	ns	0.652894361	Mtmr3	Mtmr3_Exon	11	4485929	4485978	4485977	4485978	50	+	CTGTGCTGCAGCGAGACAAACAGTTCTGATCCAGATTGCTTTCCGAGTCG	Exon (Mtmr3-207/Mtmr3, exon 1 of 3)	11	4480868	4594815	113948	2	Mtmr3-202	108837	Mtmr3-202;Mtmr3-207;Mtmr3-201;Mtmr3-203;Mtmr3-205;Mtmr3-204	Mtmr3;Mtmr3;Mtmr3;Mtmr3;Mtmr3;Mtmr3	0;0;0;0;0;0	TRUE
5829	cg20650267	-0.0000112	0.00000493	-2.264934471	0.024206766	loss	ns	-0.0000363	0.00000837	-4.341509805	0.0000192	neg	ns	-0.000472144	0.002452863	-0.192487126	0.847486687	neg	ns	0.071867115	-0.000253618	0.0000844	-3.006597942	0.002857937	neg	ns	0.863820438	Mylk	Mylk_Exon	16	34914967	34915016	34914967	34914968	50	-	CGTGTTCACCCTGGTTCTAAAGAAGGTGCAGCCCTGGCATGCCGGCCAGT	Exon (Mylk-201/Mylk, exon 14 of 32)	16	34784921	35002420	217500	1	Mylk-201	130046	Mylk-201;Mylk-207;Mylk-208	Mylk;Mylk;Mylk	0;0;0	TRUE
808	cg21843014	0.0000799	0.0000153	5.214697505	0.000000337	gain	yes	-0.000112729	0.000026	-4.330935485	0.0000201	neg	ns	-0.016057648	0.007625563	-2.10576553	0.03602868	neg	ns	1.44335165	0.000416256	0.000262242	1.587293105	0.113465695	pos	ns	0.762387235	Hnrnpul2	Hnrnpul2_Exon	19	8822890	8822939	8822938	8822939	50	+	GAACATGGCCGAGCTTACTATGAATTCCGAGAGGAGGCTTACCACAGCCG	Exon (Hnrnpul2-201/Hnrnpul2, exon 2 of 14)	19	8820010	8834143	14134	1	Hnrnpul2-201	2880	Hnrnpul2-201;Hnrnpul2-202;Ttc9c-202;Ttc9c-204;Ttc9c-201;Ttc9c-203	Hnrnpul2;Hnrnpul2;Ttc9c;Ttc9c;Ttc9c;Ttc9c	0;0;-3557;-3966;-3596;-3658	TRUE
13973	cg22385855	0.00007	0.0000244	2.864703219	0.004458993	gain	ns	0.000179641	0.0000415	4.330163918	0.0000201	pos	ns	0.039299469	0.012153954	3.23347203	0.001354772	pos	ns	2.868133838	-0.00113015	0.000417973	-2.703878788	0.007231859	neg	ns	0.431990778	Hcfc1	Hcfc1_Promoter	X	73966364	73966413	73966364	73966365	50	-	CGTAGCCCTCCCCCGCCGGAAATGGCGGAGCCCCGGCCCGGTTCCCACAC	Promoter (<=1kb)	20	73942792	73966357	23566	2	Hcfc1-201	-56	Hcfc1-201;Hcfc1-202	Hcfc1;Hcfc1	0;0	FALSE
2915	cg18295902	0.0000501	0.00000519	9.661894341	1.78E-19	gain	yes	-0.0000382	0.00000882	-4.327907659	0.0000203	neg	ns	-0.008724101	0.002582642	-3.377975299	0.000823404	neg	ns	3.084386798	0.000315454	0.0000888	3.551733272	0.00044216	pos	ns	0.910171912	Ehbp1	Ehbp1_Intron	11	22053339	22053388	22053387	22053388	50	-	TCAGGCTTCAAAGATTCACACTTCCAAAACTCTATAAGAGTTTGTGAACG	Intron (Ehbp1-201/Ehbp1, intron 20 of 23)	11	22005828	22285838	280011	2	Ehbp1-201	232450	Ehbp1-201;Ehbp1-202;Ehbp1-207	Ehbp1;Ehbp1;Ehbp1	0;0;0	TRUE
937	cg09103452	0.0000234	0.000012	1.953516831	0.051657613	gain	ns	0.0000881	0.0000204	4.328634214	0.0000203	pos	ns	0.006077809	0.005962495	1.019339937	0.308836457	pos	ns	0.510271438	0.00010336	0.00020505	0.504071522	0.61456917	pos	ns	0.436647177	Gata3	Gata3_Promoter	2	9892577	9892626	9892577	9892578	50	-	CGGCGCTTGCCTGCTCACCAGTGTTTTATGGCGTTTTCTTGCCTCTGACT	Promoter (2-3kb)	2	9874702	9890034	15333	2	Gata3-202	-2592	9230102O04Rik-202;Gata3-202;Gata3-204;Gata3-203	9230102O04Rik;Gata3;Gata3;Gata3	-3037;0;0;0	FALSE
25495	cg16043309	0.00000174	0.00000863	0.201246411	0.840637884	gain	ns	0.0000635	0.0000147	4.328714724	0.0000203	pos	ns	0.009163852	0.004297099	2.132567088	0.033745773	pos	ns	1.47178062	0.00000937	0.000147777	0.063410284	0.949480665	pos	ns	0.744763066	Epha8	Epha8_Exon	4	136936053	136936102	136936101	136936102	50	-	ACCTCCATGGCCTGGCTGAAGCGGCCACAGCCTGCTGAGGTGCGGGCTCG	Exon (Epha8-201/Epha8, exon 7 of 17)	4	136929419	136956816	27398	2	Epha8-201	20714	Epha8-201	Epha8	0	TRUE
5550	cg04841737	0.0000348	0.00000316	11.01717556	4.85E-24	gain	yes	-0.0000232	0.00000536	-4.322176654	0.0000208	neg	ns	-0.000648986	0.001571487	-0.412975358	0.679910161	neg	ns	0.167548468	0.0000894	0.000054	1.653419048	0.099257873	pos	ns	0.958917934	Pbx3	Pbx3_Intron	2	34244868	34244917	34244916	34244917	50	+	TTCCTTTCCCACACACTAGCAAAGTCCATTTTCACAACTGCTATAAAGCG	Intron (Pbx3-202/Pbx3, intron 2 of 7)	2	34171457	34372038	200582	2	Pbx3-202	127121	Pbx3-202;Pbx3-201;Pbx3-210;Pbx3-206;Pbx3-207;Pbx3-209;Pbx3-204;Pbx3-205;Pbx3-203	Pbx3;Pbx3;Pbx3;Pbx3;Pbx3;Pbx3;Pbx3;Pbx3;Pbx3	0;0;0;0;0;0;0;0;0	TRUE
19815	cg00908601	0.0000367	0.0000109	3.368138759	0.000852264	gain	ns	0.0000801	0.0000185	4.322415129	0.0000208	pos	ns	0.015906863	0.005426388	2.931390635	0.003625471	pos	ns	2.440635597	-0.000356955	0.000186613	-1.912808613	0.056693761	neg	ns	0.5809584	Foxo4	Foxo4_threeUTR	X	101260782	101260831	101260782	101260783	50	+	CGCCTGGCCTACCCAGATTGTATCATGTGCTAGATTGGAGTGGGGAAGTG	3' UTR	20	101254528	101260873	6346	1	Foxo4-201	6254	Foxo4-201;Foxo4-203;Foxo4-202;Gm20489-201;Gm614-202;Gm614-201;Il2rg-201;Il2rg-203	Foxo4;Foxo4;Foxo4;Gm20489;Gm614;Gm614;Il2rg;Il2rg	0;0;0;8192;3144;3161;7424;6603	TRUE
5681	cg01368226	-0.00000846	0.00000562	-1.506196458	0.133035022	loss	ns	-0.0000412	0.00000954	-4.322120572	0.0000208	neg	ns	0.006449559	0.002794717	2.307767989	0.021670306	pos	ns	1.664134958	-0.000114599	0.0000961	-1.192370827	0.234027786	neg	ns	0.881567774	Mapkap1	Mapkap1_Intron	2	34535321	34535370	34535321	34535322	50	-	CGCAGAGATAGAATTAAATGATGATGATCTTCCCACAAGTTGGGAGAGGA	Intron (Mapkap1-204/Mapkap1, intron 6 of 10)	2	34406862	34623475	216614	1	Mapkap1-204	128459	Mapkap1-204;Mapkap1-202;Mapkap1-201;Mapkap1-209;Mapkap1-203;Mapkap1-207	Mapkap1;Mapkap1;Mapkap1;Mapkap1;Mapkap1;Mapkap1	0;0;0;0;0;0	TRUE
1052	cg04282184	0.0000675	0.000012	5.603610304	4.64E-08	gain	yes	0.0000884	0.0000205	4.321756941	0.0000209	pos	ns	0.032626548	0.005993043	5.444070753	0.000000106	pos	ns	6.974458136	-0.000585687	0.0002061	-2.841757128	0.004783908	neg	ns	0.464727955	Gm14481	Gm14481_Intergenic_downstream	X	11250261	11250310	11250261	11250262	50	+	CGGTTGGCTTGGAGTGACAGTGATAGATTAAATGCACCAATTAAATTAGA	Distal Intergenic	20	11220607	11221235	629	1	Gm14481-201	29654	NA	NA	NA	FALSE
10310	cg13110075	0.0000377	0.00000965	3.909488965	0.000113645	gain	ns	0.0000708	0.0000164	4.321643469	0.0000209	pos	ns	0.024274004	0.004801324	5.055689649	0.000000735	pos	ns	6.133801164	-0.000325669	0.000165117	-1.9723503	0.049458127	neg	ns	0.215322303	Gm14586	Gm14586_Exon	X	52743952	52744001	52744000	52744001	50	+	ACAAAGCATCATGGGAAACGGAGTTCTCCATTCAAAGCACCAAAAACGCG	Exon (Kis2-202/Kis2-202, exon 1 of 2)	20	52772342	52772749	408	2	Gm14586-201	28748	NA	NA	NA	TRUE
17544	cg06579347	-0.0000193	0.0000151	-1.281296398	0.201047186	loss	ns	-0.000110722	0.0000256	-4.321104237	0.0000209	neg	ns	-0.02246903	0.007506831	-2.993144538	0.002983223	neg	ns	2.525314244	-0.0000811	0.000258159	-0.314290856	0.75351155	neg	ns	0.887665181	Mtch2	Mtch2_Exon	2	90849371	90849420	90849419	90849420	50	+	GTGGGATATGAGCCTCTTCCTCCAACAATAGGACGAAATATTTTTGGGCG	Exon (Mtch2-205/Mtch2, exon 2 of 13)	2	90847155	90866810	19656	1	Mtch2-205	2216	Mtch2-205;Mtch2-203;Mtch2-210;Mtch2-211;Mtch2-209;Mtch2-202;Mtch2-201;Mtch2-208;Mtch2-207	Mtch2;Mtch2;Mtch2;Mtch2;Mtch2;Mtch2;Mtch2;Mtch2;Mtch2	0;0;0;0;0;0;0;-2771;-3406	TRUE
27249	cg26938944	0.0000198	0.0000113	1.753539432	0.080497737	gain	ns	0.0000828	0.0000192	4.317319809	0.0000213	pos	ns	0.032783661	0.005617979	5.835490667	1.35E-08	pos	ns	7.869576191	-0.001445635	0.000193202	-7.482509936	7.58E-13	neg	yes	0.606178353	Nhs	Nhs_Intron	X	161940965	161941014	161941013	161941014	50	+	GCCTGCACACATTTTTCACATTAGGGAACAGATGGAAGCTGTAATTCCCG	Intron (Nhs-202/Nhs, intron 1 of 8)	20	161833296	162159730	326435	2	Nhs-202	218716	Nhs-202;Nhs-201	Nhs;Nhs	0;0	TRUE
17130	cg01980251	0.000076	0.0000106	7.17287878	5.43E-12	gain	yes	-0.0000777	0.000018	-4.31514743	0.0000215	neg	ns	-0.021697042	0.005274118	-4.113870784	0.0000499	neg	ns	4.301848098	0.000577239	0.000181376	3.182544259	0.001607951	pos	ns	0.730943359	Rufy3	Rufy3_Exon	5	88584185	88584234	88584233	88584234	50	+	GACAAGATCACACAGGCTGCCATGGAGACCATCTACCTTTGCAAATTCCG	Exon (Rufy3-207/Rufy3, exon 2 of 15)	5	88565040	88642695	77656	1	Rufy3-203	19145	Rufy3-203;Rufy3-205;Rufy3-207;Rufy3-201;Rufy3-204;Rufy3-206;Rufy3-202	Rufy3;Rufy3;Rufy3;Rufy3;Rufy3;Rufy3;Rufy3	0;0;0;0;0;0;0	TRUE
21682	cg11219763	0.0000177	0.0000126	1.411599549	0.159070805	gain	ns	0.000092	0.0000213	4.314887818	0.0000215	pos	ns	0.020590816	0.006249267	3.294916802	0.001098597	pos	ns	2.959161612	-0.000690071	0.000214912	-3.210951522	0.001461792	neg	ns	0.35107936	Brwd3	Brwd3_Intron	X	108832786	108832835	108832834	108832835	50	-	CGTATTTCAGGCCAGGACCAACCAGAAACCAGTTTTCTTCCACTAATCCG	Intron (Brwd3-205/Brwd3, intron 4 of 40)	20	108737016	108834348	97333	2	Brwd3-205	1513	Brwd3-205;Brwd3-201;Brwd3-204;Brwd3-203;Brwd3-202	Brwd3;Brwd3;Brwd3;Brwd3;Brwd3	0;0;0;0;0	TRUE
1078	cg22102193	-0.0000569	0.0000115	-4.928478272	0.00000135	loss	yes	0.0000846	0.0000196	4.312076308	0.0000218	pos	ns	0.020065845	0.005746919	3.491582982	0.000549907	pos	ns	3.259710725	-0.000371563	0.000197636	-1.880034769	0.061040926	neg	ns	0.604583806	Gm14515	Gm14515_Intergenic_upstream	X	11494376	11494425	11494376	11494377	50	-	CGGCATTTCTTCCGACTGTCAGACTTAGCAGATTGCTTTCTGGAAAGGAT	Distal Intergenic	20	11601354	11601569	216	1	Gm14515-201	-106978	NA	NA	NA	FALSE
21444	cg16165290	0.0000133	0.00000406	3.274684017	0.001177508	gain	ns	-0.0000298	0.0000069	-4.31096358	0.0000219	neg	ns	-0.006068714	0.002022299	-3.00089861	0.002910411	neg	ns	2.536045604	0.000154333	0.0000695	2.219130962	0.027201541	pos	ns	0.846955324	Zswim6	Zswim6_Intron	13	107767420	107767469	107767468	107767469	50	+	AGCCAGAAGCCTGCAGAAAACACCAATTAACTTGCAGATCCCATTTGCCG	Intron (Zswim6-204/Zswim6, intron 4 of 12)	13	107724617	107890064	165448	2	Zswim6-204	122595	Zswim6-204;Zswim6-201	Zswim6;Zswim6	0;0	TRUE
14124	cg26637809	0.0000243	0.0000128	1.900459544	0.058300358	gain	ns	0.0000934	0.0000217	4.306781246	0.0000223	pos	ns	0.018654102	0.006353582	2.935997931	0.00357351	pos	ns	2.446904976	-0.000385449	0.000218499	-1.764075127	0.078704216	neg	ns	0.306478124	Hoxd10	Hoxd10_Exon	2	74692196	74692245	74692244	74692245	50	+	CCTTATATACCTCAAGTAGACAGTTGGACAGATCCGAACAGATCTTGTCG	Promoter (<=1kb)	2	74691924	74695105	3182	1	Hoxd10-201	272	Hoxd10-201	Hoxd10	0	TRUE
24792	cg09201244	-0.0000166	0.00000308	-5.401508491	0.000000132	loss	yes	-0.0000225	0.00000524	-4.305417394	0.0000224	neg	ns	-0.003851552	0.001533688	-2.511301144	0.012537027	neg	ns	1.901805431	-0.000125313	0.0000527	-2.375904248	0.018113494	neg	ns	0.900861363	Smarcc2	Smarcc2_Exon	10	128481662	128481711	128481662	128481663	50	+	CGCCAAGCTCTGTCCCCCAGGGCCGCCAGGTTGATGCTGATACCAAGGCT	Exon (Smarcc2-202/Smarcc2, exon 18 of 29)	10	128459248	128490482	31235	1	Smarcc2-205	22414	Smarcc2-205;Smarcc2-201;Smarcc2-202;Smarcc2-203;Smarcc2-204	Smarcc2;Smarcc2;Smarcc2;Smarcc2;Smarcc2	0;0;0;0;0	TRUE
24994	cg25649770	0.000137597	0.0000272	5.060187918	0.000000719	gain	yes	0.000198817	0.0000462	4.303781659	0.0000225	pos	ns	0.037874022	0.013533801	2.798476394	0.005455966	pos	ns	2.263128364	-0.000959689	0.000465426	-2.061957738	0.04004493	neg	ns	0.464227032	Spef1	Spef1_Exon	2	131171910	131171959	131171958	131171959	50	-	TCTCTTGAGAGGCCAACAGCTCCTGCTCCTTTTCAGCGATCTGGAGGACG	Exon (Spef1-201/Spef1, exon 7 of 8)	2	131170261	131187282	17022	2	Spef1-201	15323	Cenpb-201;Spef1-201;Spef1-202;Spef1-203	Cenpb;Spef1;Spef1;Spef1	8108;0;0;0	TRUE
25425	cg10042482	0.00000842	0.0000098	0.859753026	0.390589572	gain	ns	0.0000716	0.0000166	4.302155344	0.0000227	pos	ns	0.004559369	0.004877102	0.934851912	0.35059225	pos	ns	0.455197688	-0.000115027	0.000167723	-0.685816544	0.493341368	neg	ns	0.872574172	Cux1	Cux1_Intron	5	136462748	136462797	136462796	136462797	50	-	ACTGACAATGTGAATATAGTAATTGGGGCTGATTTCTTGGCGCCTGGCCG	Intron (Cux1-207/Cux1, intron 2 of 22)	5	136248135	136567248	319114	2	Cux1-207	104451	Cux1-207;Cux1-211;Cux1-203;Cux1-213;Cux1-201;Cux1-204;Cux1-212;Cux1-206;Cux1-210	Cux1;Cux1;Cux1;Cux1;Cux1;Cux1;Cux1;Cux1;Cux1	0;0;0;0;0;0;0;0;0	TRUE
6713	cg27236661	0.0000414	0.000012	3.439621164	0.000662303	gain	ns	0.000088	0.0000204	4.301468529	0.0000228	pos	ns	0.023766965	0.005990409	3.967502592	0.0000903	pos	ns	4.044407864	-0.000328669	0.00020601	-1.595405791	0.111640449	neg	ns	0.448671117	Pcdh1	Pcdh1_Intergenic_downstream	18	38158661	38158710	38158661	38158662	50	-	CGCGGGCAGGCAGAGAAGCACCACACAAGAAATTGATTCCATTAAAAAGT	Distal Intergenic	18	38188890	38203163	14274	2	Pcdh1-204	44502	NA	NA	NA	FALSE
18420	cg11591093	0.0000166	0.00000313	5.296590136	0.000000224	gain	yes	-0.0000228	0.00000531	-4.299822516	0.0000229	neg	ns	0.004655755	0.001555525	2.993045019	0.002984169	pos	ns	2.525176656	-0.000134834	0.0000535	-2.52051976	0.01221991	neg	ns	0.951687413	Spop	Spop_fiveUTR	11	95470580	95470629	95470628	95470629	50	-	AACTGGCGATGTCAAGGGTTCCAAGTCCTCCACCTCCGGCAGAAATGTCG	5' UTR	11	95414080	95493406	79327	1	Spop-202	56500	Spop-202;Spop-204;Spop-201;Spop-203;Spop-205	Spop;Spop;Spop;Spop;Spop	0;0;0;0;-3690	TRUE
12227	cg25895486	-0.00000556	0.00000374	-1.484101966	0.138797907	loss	ns	-0.0000273	0.00000636	-4.297753029	0.0000231	neg	ns	0.007650565	0.001863624	4.105209339	0.0000517	pos	ns	4.286405363	-0.000228526	0.0000641	-3.565715025	0.000420125	neg	ns	0.945037348	Ptch1	Ptch1_Exon	13	63540765	63540814	63540765	63540766	50	+	CGCCAGCCAGCCCCACGGCACCCTGGGACTTGGAGCAGTCCCAGCGCAGC	Exon (Ptch1-201/Ptch1, exon 10 of 23)	13	63508328	63565735	57408	2	Ptch1-201	24921	Ptch1-201;Ptch1-204;Ptch1-206;Ptch1-202;Ptch1-210;Ptch1-207;Ptch1-203;Ptch1-205;Ptch1-208	Ptch1;Ptch1;Ptch1;Ptch1;Ptch1;Ptch1;Ptch1;Ptch1;Ptch1	0;0;0;0;-1087;0;0;0;4502	TRUE
22040	cg26227005	-0.0000397	0.0000142	-2.794735515	0.005517898	loss	ns	0.000103634	0.0000241	4.293598702	0.0000235	pos	ns	0.010153883	0.007071291	1.43593059	0.152030386	pos	ns	0.818069602	-0.000169728	0.000243181	-0.697947933	0.485732931	neg	ns	0.398108102	Elavl4	Elavl4_Intron	4	110287601	110287650	110287601	110287602	50	+	CGAAGGGAGGCGTTGCAACATCAGGTGCTATTTAAATTAGCTACTGCCAG	Intron (Elavl4-205/Elavl4, intron 1 of 6)	4	110203737	110290272	86536	2	Elavl4-205	2622	Elavl4-204;Elavl4-201;Elavl4-203;Elavl4-202;Elavl4-205;Elavl4-206;Elavl4-207;Elavl4-208;Elavl4-212;Elavl4-209	Elavl4;Elavl4;Elavl4;Elavl4;Elavl4;Elavl4;Elavl4;Elavl4;Elavl4;Elavl4	0;0;0;0;0;0;0;0;0;0	TRUE
20834	cg09998296	0.0000445	0.0000164	2.705182942	0.00720419	gain	ns	-0.000119883	0.0000279	-4.291230096	0.0000238	neg	ns	0.021083065	0.008184537	2.57596312	0.010458964	pos	ns	1.980511312	-0.001067008	0.000281466	-3.790901518	0.000180374	neg	ns	0.421170363	Rpl10-ps1	Rpl10-ps1_Intron	2	105608248	105608297	105608248	105608249	50	-	CGTGTGGTGGTTTCAGCATGAGACAGTTACTCAGTTTAATGCCAAATACA	Intron (Pax6os1-202/Pax6os1-202, intron 1 of 3)	2	105554201	105554845	645	2	Rpl10-ps1-201	-53452	NA	NA	NA	TRUE
634	cg01125381	0.0000436	0.00000748	5.832193651	1.38E-08	gain	yes	0.0000545	0.0000127	4.289298848	0.000024	pos	ns	0.008661971	0.003724176	2.325876125	0.020669929	pos	ns	1.684661014	-0.000118825	0.000128074	-0.927785921	0.354240422	neg	ns	0.51907986	Usp27x	Usp27x_fiveUTR	X	7375017	7375066	7375065	7375066	50	+	TGCAGGACTTTGCCTTGCTTTTCCTGGTCTCTGGGGTTCCACACCACACG	Promoter (<=1kb)	20	7371274	7375826	4553	2	Usp27x-202	760	Usp27x-202;Usp27x-203;Usp27x-201	Usp27x;Usp27x;Usp27x	0;0;0	TRUE
19516	cg26226631	0.0000327	0.00000609	5.362993144	0.00000016	gain	yes	-0.0000444	0.0000103	-4.288844075	0.000024	neg	ns	-0.010353646	0.003032097	-3.414681965	0.000723562	neg	ns	3.140524327	0.000234812	0.000104274	2.251881493	0.025029466	pos	ns	0.873615105	Armc8	Armc8_threeUTR	9	99520415	99520464	99520415	99520416	50	+	CGACTTTCAGGTTGACGTCACTCCCTGCCTGCTGGCTGTCAGGACTGGGG	3' UTR	9	99478372	99568899	90528	2	Armc8-201	48435	Armc8-201;Armc8-202;Armc8-203	Armc8;Armc8;Armc8	0;0;0	TRUE
708	cg03340793	0.00000385	0.00000741	0.519284846	0.603932658	gain	ns	0.000054	0.0000126	4.288458644	0.0000241	pos	ns	0.008327235	0.003688752	2.257466499	0.024674524	pos	ns	1.607751219	-0.000126408	0.000126856	-0.996465487	0.319801189	neg	ns	0.787192472	Porcn	Porcn_Exon	X	8204272	8204321	8204272	8204273	50	+	CGAGGTAGCACAGGAGGCTGAGCAGCACGACCCAAACCATGTGCAGCTGG	Exon (Porcn-202/Porcn, exon 3 of 14)	20	8193848	8206525	12678	2	Porcn-202	2204	Porcn-202;Porcn-207;Porcn-201;Porcn-203;Porcn-204;Porcn-205;Porcn-206	Porcn;Porcn;Porcn;Porcn;Porcn;Porcn;Porcn	0;0;0;0;0;0;0	TRUE
18418	cg07609421	0.0000139	0.00000343	4.063406543	0.0000613	gain	ns	-0.000025	0.00000582	-4.287255931	0.0000242	neg	ns	0.009828047	0.00170509	5.763945206	1.98E-08	pos	ns	7.702453512	-0.000237759	0.0000586	-4.054695066	0.0000636	neg	ns	0.918496998	Spop	Spop_fiveUTR	11	95470586	95470635	95470586	95470587	50	+	CGATGTCAAGGGTTCCAAGTCCTCCACCTCCGGCAGAAATGTCGAGTGGC	5' UTR	11	95414080	95493406	79327	1	Spop-202	56506	Spop-202;Spop-204;Spop-201;Spop-203;Spop-205	Spop;Spop;Spop;Spop;Spop	0;0;0;0;-3684	TRUE
3551	cg12835446	0.0000391	0.00000548	7.129649615	7.12E-12	gain	yes	-0.0000399	0.00000931	-4.284740042	0.0000244	neg	ns	-0.006872998	0.002726185	-2.521104493	0.012200039	neg	ns	1.913638784	0.000180489	0.0000938	1.92515018	0.055125297	pos	ns	0.880470537	Agap3	Agap3_Intron	5	24490585	24490634	24490633	24490634	50	-	TTAATAGCTTTCCACGCTCTGAACTCGTTGTTAATTCCAGTAATAAAACG	Intron (Agap3-201/Agap3, intron 10 of 17)	5	24452177	24502047	49871	1	Agap3-201	38408	Agap3-201;Agap3-202	Agap3;Agap3	0;0	TRUE
27007	cg05845204	0.0000139	0.00000599	2.326237529	0.020650382	gain	ns	-0.0000436	0.0000102	-4.281478613	0.0000248	neg	ns	0.025110346	0.002982335	8.419692963	1.42E-15	pos	yes	14.84796347	-0.000711347	0.000102562	-6.935755896	2.36E-11	neg	yes	0.880892114	Rbm39	Rbm39_threeUTR	2	156167535	156167584	156167583	156167584	50	-	TACCTCACAGGGCTCTTGTCTTTTCTGAATGGACTTTTGCTTCGGGAACG	3' UTR	2	156147239	156180238	33000	2	Rbm39-203	12654	Rbm39-203;Rbm39-217;Rbm39-215;Rbm39-201;Rbm39-225;Rbm39-223;Rbm39-220;Rbm39-204;Rbm39-209;Rbm39-207;Rbm39-206;Rbm39-216;Rbm39-221;Rbm39-213;Rbm39-214	Rbm39;Rbm39;Rbm39;Rbm39;Rbm39;Rbm39;Rbm39;Rbm39;Rbm39;Rbm39;Rbm39;Rbm39;Rbm39;Rbm39;Rbm39	0;0;0;0;0;0;-2612;0;-2323;0;0;0;0;0;0	TRUE
25944	cg14795764	0.0000423	0.00000875	4.838589274	0.00000207	gain	ns	-0.0000636	0.0000149	-4.280638962	0.0000249	neg	ns	-0.007391047	0.004353111	-1.697877193	0.09053445	neg	ns	1.04318613	0.000425129	0.000149703	2.839813773	0.004812391	pos	ns	0.891257148	Spen	Spen_Exon	4	141517262	141517311	141517262	141517263	50	-	CGTTCATGGTGTCCATAGGCACTATGTTCATAAGCACGCTCCCTGTTATC	Exon (Spen-201/Spen, exon 3 of 15)	4	141467890	141538449	70560	2	Spen-201	21138	Spen-201;Spen-202;Spen-203;Spen-205	Spen;Spen;Spen;Spen	0;0;0;0	TRUE
16819	cg03257592	0.000031	0.0000153	2.030192366	0.043190516	gain	ns	0.000110781	0.0000259	4.271573756	0.0000258	pos	ns	0.008541887	0.007597945	1.124236508	0.261782482	pos	ns	0.582059418	0.0000267	0.000261293	0.102284868	0.918596696	pos	ns	0.746555562	Gm8504	Gm8504_Intergenic_upstream	12	86635946	86635995	86635946	86635947	50	-	CGCTGGTAAATCTTTATTAATTTTAATTGGCGGCACCCATTTATAAGAAC	Distal Intergenic	12	86650573	86651662	1090	1	Gm8504-201	-14627	NA	NA	NA	FALSE
16285	cg03328885	0.000182912	0.0000175	10.47575137	3.49E-22	gain	yes	-0.000126641	0.0000297	-4.269306855	0.0000261	neg	ns	0.004949193	0.008690272	0.56950949	0.569422869	pos	ns	0.244565095	0.000225946	0.000298858	0.756033259	0.450203368	pos	ns	0.46263081	Nfix	Nfix_Exon	8	84716282	84716331	84716282	84716283	50	-	CGTTGGGCTGCGAACAACATAAATAGAGTGACGCATGAAGGCACATCACA	Exon (Nfix-204/Nfix, exon 9 of 11)	8	84704712	84773396	68685	2	Nfix-204	57065	Nfix-204;Nfix-201;Nfix-202;Nfix-203;Nfix-206;Nfix-205	Nfix;Nfix;Nfix;Nfix;Nfix;Nfix	0;0;0;0;0;0	TRUE
6820	cg09463627	0.0000292	0.00000465	6.292768783	1.06E-09	gain	yes	-0.0000337	0.0000079	-4.26639033	0.0000264	neg	ns	-0.000828313	0.002313055	-0.358103396	0.720509655	neg	ns	0.142360195	-0.000108951	0.0000795	-1.369665369	0.171782683	neg	ns	0.904714867	Psmb7	Psmb7_Intron	2	38595172	38595221	38595172	38595173	50	-	CGAGTGCTTGAGGGGACAAAACAGACCCCCAAGTTCATTAAACTGACCAG	Intron (Psmb7-201/Psmb7, intron 6 of 7)	2	38588036	38644087	56052	2	Psmb7-201	48866	Nek6-201;Psmb7-201	Nek6;Psmb7	0;0	TRUE
23371	cg05101180	-0.0000116	0.000011	-1.060599448	0.289697586	loss	ns	0.0000794	0.0000186	4.263744232	0.0000267	pos	ns	0.000272623	0.005453526	0.049990269	0.960162337	pos	ns	0.017655334	0.0000748	0.000187546	0.39880663	0.690310256	pos	ns	0.431339528	Sox21	Sox21_Intergenic_downstream	14	118194728	118194777	118194728	118194729	50	+	CGTTTCCATTGCACTTTTACCCAAGGCAATGGGCAGAATTTAACGGATTC	Distal Intergenic	14	118233232	118237030	3799	2	Sox21-201	42253	NA	NA	NA	FALSE
8105	cg11540609	-0.00000402	0.0000181	-0.222318457	0.824212381	loss	ns	0.000131051	0.0000308	4.261314091	0.000027	pos	ns	0.015822584	0.009009795	1.756153683	0.080049623	pos	ns	1.09664071	0.000321642	0.000309846	1.038069448	0.300046727	pos	ns	0.447602384	Pax2	Pax2_Promoter	19	44748175	44748224	44748223	44748224	50	+	ATGGTGTTGAAGATGGAATTCAATTGAGAGCCCATCTGTGCACCCCCTCG	Promoter (7-8kb)	19	44756045	44837851	81807	1	Pax2-203	-7821	NA	NA	NA	FALSE
11542	cg01759284	0.00000203	0.00000259	0.784907086	0.433107464	gain	ns	-0.0000187	0.00000439	-4.259672607	0.0000272	neg	ns	0.001260009	0.001286988	0.979037202	0.328325012	pos	ns	0.483696031	-0.0000593	0.0000443	-1.340882483	0.180940289	neg	ns	0.876209287	Pnn	Pnn_Exon	12	59071443	59071492	59071443	59071444	50	-	CGCATCGAATTTGCAGAACAAATAAATAAAATGGAGGCTAGGCCTAGAAG	Exon (Pnn-201/Pnn, exon 9 of 9)	12	59066884	59073998	7115	1	Pnn-201	4559	Pnn-201;Pnn-203;Pnn-204;Pnn-202	Pnn;Pnn;Pnn;Pnn	0;0;0;0	TRUE
13151	cg23976139	0.0000151	0.00000338	4.463525428	0.0000113	gain	ns	-0.0000244	0.00000574	-4.258697589	0.0000273	neg	ns	-0.002875548	0.001680609	-1.71101515	0.088078649	neg	ns	1.055129356	0.0000241	0.0000578	0.417357597	0.676705759	pos	ns	0.891099278	Ikzf2	Ikzf2_Exon	1	69577815	69577864	69577863	69577864	50	-	GGGCCCAATGCAAACCATGCCACAGACGTCACATTTCAGTTTACCATTCG	Exon (Ikzf2-201/Ikzf2, exon 4 of 8)	1	69531214	69685821	154608	2	Ikzf2-201	107957	Ikzf2-201;Ikzf2-207;Ikzf2-202;Ikzf2-204;Ikzf2-208;Ikzf2-209;Ikzf2-206	Ikzf2;Ikzf2;Ikzf2;Ikzf2;Ikzf2;Ikzf2;Ikzf2	0;0;0;0;0;0;107436	TRUE
3036	cg13885520	-0.000140693	0.0000637	-2.210301557	0.027814394	loss	ns	0.00046049	0.000108139	4.258327676	0.0000273	pos	ns	-0.001407611	0.031680998	-0.044430765	0.964589645	neg	ns	0.015657405	0.002745519	0.001089507	2.519964382	0.012238811	pos	ns	0.861792337	Lrmda	Lrmda_Intron	14	22457711	22457760	22457759	22457760	50	+	ACTCCTTCCTTTCTTTATAGAATGCAAATTGTAACCTGTTTTTAAAGCCG	Intron (Lrmda-201/Lrmda, intron 2 of 6)	14	22019712	23056085	1036374	1	Lrmda-201	437999	Lrmda-201;Lrmda-204;Lrmda-203;Lrmda-206;Lrmda-202	Lrmda;Lrmda;Lrmda;Lrmda;Lrmda	0;0;0;0;0	TRUE
11022	cg16238815	0.00000507	0.000023	0.220626607	0.825528415	gain	ns	0.000166239	0.000039	4.257883482	0.0000274	pos	ns	0.038713096	0.011438202	3.384543808	0.000804643	pos	ns	3.094396587	-0.000605598	0.000393359	-1.53955554	0.124688816	neg	ns	0.318592622	Mbip	Mbip_Intergenic_downstream	12	56302135	56302184	56302135	56302136	50	-	CGCGGCGTGTGCCCTGACTTGATTGTAATTGCCCGAATCTGCTCCCGCTG	Distal Intergenic	12	56340511	56345821	5311	2	Mbip-202	43686	NA	NA	NA	FALSE
5101	cg18722778	-0.00000691	0.0000127	-0.543632639	0.587085021	loss	ns	0.0000918	0.0000216	4.254910111	0.0000277	pos	ns	0.024195571	0.006321834	3.82730274	0.000156719	pos	ns	3.804879063	-0.000665128	0.000217407	-3.059365413	0.002411736	neg	ns	0.514960243	Dnm1	Dnm1_Exon	2	32318479	32318528	32318479	32318480	50	+	CGTCTACCCAGTGTTTAGACTATCTGTTCAGGACTCCCAAATTGTACAGT	Exon (Mir199b-201/Mir199b-201, exon 1 of 1)	2	32308471	32353263	44793	2	Dnm1-204	34735	Dnm1-204;Dnm1-209;Dnm1-202;Dnm1-201;Dnm1-203;Dnm1-205;Dnm1-214;Dnm1-206;Dnm1-216;Dnm1-217;Dnm1-213	Dnm1;Dnm1;Dnm1;Dnm1;Dnm1;Dnm1;Dnm1;Dnm1;Dnm1;Dnm1;Dnm1	0;0;0;0;0;0;0;0;0;0;-1148	TRUE
21884	cg11514271	-0.00000231	0.00000718	-0.321680785	0.74791133	loss	ns	0.0000519	0.0000122	4.252669745	0.000028	pos	ns	0.005850906	0.003575127	1.636558719	0.102737471	pos	ns	0.988271128	0.000132378	0.000122948	1.076699266	0.282451825	pos	ns	0.875741917	Gm13925	Gm13925_Intergenic_downstream	2	109544141	109544190	109544189	109544190	50	-	GATAAAAATTTAGCATTTTGGTCACTCCCTGTCCCCTGAGCAGAGCTCCG	Distal Intergenic	2	109477003	109499200	22198	1	Gm13925-201	67187	NA	NA	NA	FALSE
14741	cg24676204	0.0000185	0.00000694	2.669393943	0.007999125	gain	ns	-0.0000501	0.0000118	-4.25216083	0.0000281	neg	ns	0.018971702	0.003451636	5.496437304	0.000000081	pos	ns	7.091465981	-0.000716252	0.000118701	-6.034063598	4.56E-09	neg	yes	0.740403372	Git1	Git1_Exon	11	77506506	77506555	77506554	77506555	50	+	GGACTTCCAGCTGCTGACTCAGCAGGTGATCCAGTGCGCCTATGACATCG	Exon (Git1-201/Git1, exon 20 of 20)	11	77493562	77507786	14225	1	Git1-201	12944	Git1-201;Git1-202;Git1-206;Git1-203;Git1-205;Git1-204;Trp53i13-201;Trp53i13-203;Trp53i13-202;Trp53i13-204	Git1;Git1;Git1;Git1;Git1;Git1;Trp53i13;Trp53i13;Trp53i13;Trp53i13	0;0;7415;5518;4027;1370;6815;6208;6480;9176	TRUE
14906	cg24543303	-0.0000167	0.00000245	-6.790714655	5.70E-11	loss	yes	-0.0000177	0.00000417	-4.247236375	0.0000286	neg	ns	0.004240759	0.0012215	3.471764348	0.000590486	pos	ns	3.228790466	-0.000145463	0.000042	-3.462807739	0.000609729	neg	ns	0.976645262	Fam222b	Fam222b_fiveUTR	11	78153792	78153841	78153840	78153841	50	+	AAAATCTTCCCCAACAGTGTGAAGGTTCCCCAGCGGAAACACGTTCGTCG	5' UTR	11	78094660	78156700	62041	1	Fam222b-201	59132	Fam222b-201;Fam222b-202;Fam222b-203;Gm12571-201;Traf4-203	Fam222b;Fam222b;Fam222b;Gm12571;Traf4	0;0;0;-4354;11748	TRUE
4677	cg09260569	0.0000613	0.00000562	10.91527648	1.09E-23	gain	yes	-0.0000405	0.00000954	-4.246895038	0.0000287	neg	ns	0.004966256	0.002796104	1.776134347	0.07669158	pos	ns	1.115252315	-0.000226389	0.0000962	-2.354346149	0.019178867	neg	ns	0.861277549	Cacna1d	Cacna1d_Exon	14	30089831	30089880	30089879	30089880	50	+	GCTGAGGGCCACGTCTATAATGCTGCCGATTACGATGAGGGAGTCAAACG	Exon (Cacna1d-202/Cacna1d, exon 30 of 47)	14	30039941	30491453	451513	2	Cacna1d-202	401573	Cacna1d-202;Cacna1d-201;Cacna1d-208;Cacna1d-209;Cacna1d-214;Cacna1d-204;Cacna1d-207;Cacna1d-218;Cacna1d-216;Cacna1d-217;Cacna1d-210;Cacna1d-219	Cacna1d;Cacna1d;Cacna1d;Cacna1d;Cacna1d;Cacna1d;Cacna1d;Cacna1d;Cacna1d;Cacna1d;Cacna1d;Cacna1d	0;0;0;0;0;0;0;0;0;0;0;0	TRUE
26619	cg26438184	-0.0000203	0.00000402	-5.048502305	0.000000761	loss	yes	-0.000029	0.00000682	-4.245822833	0.0000288	neg	ns	0.007116139	0.001998926	3.559981558	0.000429033	pos	ns	3.367509327	-0.000439533	0.0000687	-6.393868985	5.94E-10	neg	yes	0.873450031	Dennd5b	Dennd5b_Intron	6	149032449	149032498	149032497	149032498	50	-	GGTCCCACTCCCAGAATGCCATGGAGTTCTGACAGACCAAAAGTTCCCCG	Intron (Dennd5b-201/Dennd5b, intron 8 of 20)	6	148988071	149101680	113610	2	Dennd5b-201	69182	Dennd5b-201;Dennd5b-205	Dennd5b;Dennd5b	0;0	TRUE
25636	cg23832435	0.0000335	0.00000752	4.456761233	0.0000116	gain	ns	-0.0000542	0.0000128	-4.244240332	0.000029	neg	ns	-0.000319186	0.003741081	-0.085319213	0.932062693	neg	ns	0.030554875	0.0000652	0.000128655	0.50700855	0.612509274	pos	ns	0.797034107	Btbd3	Btbd3_Intron	2	137687310	137687359	137687358	137687359	50	+	CAGAGCTGGGGACACCAGGAGGGACAATGACCATGTAAGTGGTTCTCACG	Intron (Gm14064-201/Gm14064-201, intron 2 of 4)	2	138256565	138287422	30858	1	Btbd3-202	-569206	NA	NA	NA	TRUE
4309	cg04312977	0.00000233	0.00000498	0.468420266	0.63981327	gain	ns	0.0000359	0.00000847	4.242660115	0.0000292	pos	ns	0.00243575	0.002480794	0.981842985	0.32694285	pos	ns	0.485528156	0.000103754	0.0000853	1.216135316	0.224858588	pos	ns	0.695331921	Dll3	Dll3_Exon	7	28298628	28298677	28298676	28298677	50	+	GTGGAGACAGGGACCGTGCAGAGGGGTCCAGTCCAGCCCTCTAGGCATCG	Exon (Dll3-201/Dll3, exon 5 of 9)	7	28293553	28302238	8686	2	Dll3-201	3561	Dll3-201;Dll3-202;Dll3-203	Dll3;Dll3;Dll3	0;-4147;0	TRUE
1342	cg14764790	-0.0000019	0.0000246	-0.077382083	0.938369514	loss	ns	0.000177435	0.0000418	4.243022228	0.0000292	pos	ns	0.021982082	0.012251265	1.794270405	0.073744304	pos	ns	1.132271521	0.0000377	0.00042132	0.089412416	0.928811894	pos	ns	0.797639664	Cadps	Cadps_Intron	14	12389311	12389360	12389359	12389360	50	+	CAACAGATTGAGCCTCGTATAAAGGCCTGAGACTGTGCAAGGGTTCCCCG	Intron (Cadps-210/Cadps, intron 27 of 28)	14	12372563	12823053	450491	2	Cadps-210	433693	Cadps-210;Cadps-202;Cadps-203;Cadps-204;Cadps-201;Cadps-212;Cadps-208	Cadps;Cadps;Cadps;Cadps;Cadps;Cadps;Cadps	0;0;0;0;0;0;0	TRUE
19228	cg03850330	0.0000177	0.00000391	4.531453653	0.00000837	gain	ns	-0.0000282	0.00000664	-4.240944222	0.0000294	neg	ns	0.009183969	0.001944678	4.722615981	0.00000353	pos	ns	5.451842751	-0.000223451	0.0000669	-3.341208033	0.00093617	neg	ns	0.939775459	Msl1	Msl1_Exon	11	98800335	98800384	98800335	98800336	50	+	CGTTACCATTACGGGAATCCTCTCCAAAGAAGGAGGAGACTGTAGCAAGT	Exon (Msl1-201/Msl1, exon 3 of 9)	11	98795516	98807859	12344	1	Msl1-201	4819	Casc3-201;Msl1-201;Msl1-203;Msl1-204;Msl1-202;Msl1-205;Msl1-206	Casc3;Msl1;Msl1;Msl1;Msl1;Msl1;Msl1	-4521;0;0;0;0;0;0	TRUE
26689	cg22112884	0.00000907	0.00000421	2.155785414	0.031869672	gain	ns	0.0000303	0.00000715	4.240446265	0.0000295	pos	ns	0.00421283	0.002093545	2.012294958	0.045053506	pos	ns	1.346271412	-0.000121444	0.000072	-1.686797545	0.092648267	neg	ns	0.854495793	Fgd1	Fgd1_Exon	X	151086556	151086605	151086556	151086557	50	-	CGGGAAAAGGAAGTCACCATGTGCATGCGCTGCCAGGAGCCCTTCAATTC	Exon (Fgd1-202/Fgd1, exon 15 of 18)	20	151046150	151089521	43372	1	Fgd1-202	40406	Fgd1-202;Fgd1-201;Fgd1-204;Tsr2-202;Tsr2-201;Tsr2-203;Tsr2-204	Fgd1;Fgd1;Fgd1;Tsr2;Tsr2;Tsr2;Tsr2	0;0;0;9938;9938;9938;9918	TRUE
20096	cg07992814	0.000085	0.0000165	5.136639758	0.000000495	gain	yes	-0.000119099	0.0000281	-4.238551966	0.0000297	neg	ns	0.038330354	0.008232023	4.656249479	0.00000478	pos	ns	5.320355466	-0.001281425	0.000283099	-4.526426807	0.00000856	neg	ns	0.57988444	Gpatch8	Gpatch8_Exon	11	102531308	102531357	102531308	102531309	50	-	CGAACCTGGCTTTAAAAACTGGGCTGTCAAAAGAACAGTTAAATGTAACA	Exon (Gpatch8-205/Gpatch8, exon 3 of 6)	11	102475915	102556199	80285	2	Gpatch8-206	24842	Gpatch8-206;Gpatch8-205;Gpatch8-203	Gpatch8;Gpatch8;Gpatch8	0;0;0	TRUE
22039	cg08106706	-0.0000523	0.0000126	-4.162032885	0.0000409	loss	ns	0.0000905	0.0000213	4.2386872	0.0000297	pos	ns	-0.00473886	0.006251705	-0.758010808	0.44902036	neg	ns	0.347733966	0.0000281	0.000214996	0.130921773	0.895922111	pos	ns	0.269072693	Elavl4	Elavl4_fiveUTR	4	110287479	110287528	110287527	110287528	50	-	CTAGGATGTAGATAAGAACAACTGAACAGAGCCTTGCTGAAATTGGCTCG	Promoter (<=1kb)	4	110203722	110287527	83806	2	Elavl4-204	0	Elavl4-204;Elavl4-201;Elavl4-203;Elavl4-202;Elavl4-205;Elavl4-206;Elavl4-207;Elavl4-208;Elavl4-212;Elavl4-209	Elavl4;Elavl4;Elavl4;Elavl4;Elavl4;Elavl4;Elavl4;Elavl4;Elavl4;Elavl4	0;0;0;0;0;0;0;0;0;0	TRUE
23006	cg00672291	0.0000314	0.00000627	5.004676379	0.00000094	gain	yes	-0.0000451	0.0000106	-4.237064389	0.0000299	neg	ns	0.013641038	0.003119318	4.373083887	0.0000167	pos	ns	4.776043667	-0.000466907	0.000107273	-4.352509799	0.0000183	neg	ns	0.864543	Toe1	Toe1_Exon	4	116806308	116806357	116806308	116806309	50	+	CGGGTCCTGGCAGCATGACACACGGCCTTGTAACGTTCCTCAATGCACCT	Exon (Toe1-202/Toe1, exon 4 of 9)	4	116794310	116807548	13239	2	Toe1-202	1191	Mutyh-201;Mutyh-203;Mutyh-202;Mutyh-206;Tesk2-201;Tesk2-203;Tesk2-202;Tesk2-204;Toe1-202;Toe1-201;Toe1-208;Toe1-207;Toe1-204;Toe1-203;Toe1-206;Toe1-205	Mutyh;Mutyh;Mutyh;Mutyh;Tesk2;Tesk2;Tesk2;Tesk2;Toe1;Toe1;Toe1;Toe1;Toe1;Toe1;Toe1;Toe1	-1366;-1368;-1381;-1391;85360;0;64625;34545;0;0;-1116;-703;0;0;0;0	TRUE
14432	cg01933423	0.0000207	0.0000105	1.980065243	0.048580201	gain	ns	-0.0000753	0.0000178	-4.236375455	0.00003	neg	ns	0.024101278	0.005209852	4.62609615	0.00000548	pos	ns	5.261102902	-0.000924533	0.000179166	-5.160191568	0.000000441	neg	yes	0.882243688	Ppp2r5e	Ppp2r5e_Exon	12	75593236	75593285	75593236	75593237	50	-	CGACCTCTTCTGTCTGGCTTTTCTGACGGACTTCCGAGAAAATCCGTCTA	Exon (Ppp2r5e-201/Ppp2r5e, exon 2 of 14)	12	75450881	75596200	145320	2	Ppp2r5e-201	2915	Ppp2r5e-201;Ppp2r5e-205;Ppp2r5e-202;Ppp2r5e-204	Ppp2r5e;Ppp2r5e;Ppp2r5e;Ppp2r5e	0;0;0;0	TRUE
10696	cg11736686	-0.0000627	0.0000133	-4.724478747	0.0000035	loss	ns	0.0000955	0.0000225	4.235698505	0.0000301	pos	ns	-0.011070345	0.006603381	-1.676466287	0.094655006	neg	ns	1.023856412	0.000481835	0.00022709	2.121780992	0.034649118	pos	ns	0.704150069	Myh7	Myh7_Exon	14	54989287	54989336	54989287	54989288	50	+	CGCTGCTTCAGCTTGAACTTCATGTTTCCAAAGTGCATGATGGCGCCTGT	Exon (Myh7-201/Myh7, exon 13 of 41)	14	54970684	54994626	23943	2	Myh7-201	5290	Myh7-201;Myh7-204;Myh7-202;Myh7-208;Myh7-207;Myh7-203;Myh7-205	Myh7;Myh7;Myh7;Myh7;Myh7;Myh7;Myh7	0;0;-1869;4355;5207;5212;5207	TRUE
5428	cg06196984	0.0000352	0.00000711	4.951817725	0.00000121	gain	yes	-0.0000511	0.0000121	-4.234721353	0.0000302	neg	ns	0.000927177	0.003536363	0.262183857	0.793353833	pos	ns	0.100533076	-0.000523316	0.000121615	-4.303050722	0.0000226	neg	ns	0.825628279	Rgl2	Rgl2_Exon	17	33932673	33932722	33932673	33932674	50	+	CGATCCCCCTGCTGACCCCACGGATGTCCTGGTGTTCCTCGCTGACCACT	Exon (Rgl2-201/Rgl2, exon 6 of 18)	17	33929582	33937687	8106	1	Rgl2-201	3091	Rgl2-202;Rgl2-201;Rgl2-205;Rgl2-203;Rgl2-213;Rgl2-210;Rgl2-214;Rgl2-212;Rgl2-207;Rgl2-204;Rgl2-209;Rgl2-208;Rgl2-206;Rgl2-211;Tapbp-201;Tapbp-206;Tapbp-207;Tapbp-204	Rgl2;Rgl2;Rgl2;Rgl2;Rgl2;Rgl2;Rgl2;Rgl2;Rgl2;Rgl2;Rgl2;Rgl2;Rgl2;Rgl2;Tapbp;Tapbp;Tapbp;Tapbp	3130;0;2769;2699;0;1790;0;1765;1738;0;0;0;0;0;13341;13036;12146;6555	TRUE
10410	cg14576207	0.0000169	0.00000426	3.979227913	0.0000861	gain	ns	-0.0000306	0.00000723	-4.232237357	0.0000305	neg	ns	0.003161293	0.002118153	1.49247642	0.136591275	pos	ns	0.864577041	-0.0000728	0.0000728	-0.998840516	0.318650972	neg	ns	0.911340462	Aff4	Aff4_Exon	11	53380569	53380618	53380617	53380618	50	+	TAATAATTACATTTCAGGAGATGACGCATTCATGGCCTCCCCCTCTAACG	Exon (Aff4-201/Aff4, exon 5 of 21)	11	53350833	53421830	70998	1	Aff4-201	29736	Aff4-201;Aff4-205;Aff4-204;Aff4-206;Aff4-203	Aff4;Aff4;Aff4;Aff4;Aff4	0;0;0;0;0	TRUE
15055	cg17870945	-0.0000269	0.0000202	-1.330752132	0.18424856	loss	ns	0.000145146	0.0000343	4.231634122	0.0000306	pos	ns	0.026230171	0.010048821	2.610273529	0.009486375	pos	ns	2.022899733	-0.00034003	0.000345578	-0.983944193	0.32591026	neg	ns	0.65164026	Elfn2	Elfn2_Exon	15	78673115	78673164	78673115	78673116	50	-	CGATAACCATGCCAAAGAGGCAGCCCAGGATGGTCATGATGTAGTGGGTG	Exon (Elfn2-202/Elfn2, exon 2 of 2)	15	78667331	78718113	50783	2	Elfn2-202	44949	Elfn2-202;Elfn2-201;Elfn2-204;Elfn2-203	Elfn2;Elfn2;Elfn2;Elfn2	0;0;2062;0	TRUE
807	cg13362034	0.0000651	0.0000106	6.157759141	2.28E-09	gain	yes	-0.000076	0.000018	-4.22923606	0.0000309	neg	ns	-0.015094039	0.005265625	-2.866523921	0.004434093	neg	ns	2.3531952	0.000385497	0.000181084	2.128827017	0.034056688	pos	ns	0.735389872	Hnrnpul2	Hnrnpul2_Exon	19	8822899	8822948	8822899	8822900	50	+	CGAGCTTACTATGAATTCCGAGAGGAGGCTTACCACAGCCGGTGAGGGAA	Exon (Hnrnpul2-201/Hnrnpul2, exon 2 of 14)	19	8820010	8834143	14134	1	Hnrnpul2-201	2889	Hnrnpul2-201;Hnrnpul2-202;Ttc9c-202;Ttc9c-204;Ttc9c-201;Ttc9c-203	Hnrnpul2;Hnrnpul2;Ttc9c;Ttc9c;Ttc9c;Ttc9c	0;0;-3566;-3975;-3605;-3667	TRUE
18413	cg08695452	0.0000628	0.0000078	8.055303188	1.73E-14	gain	yes	-0.000056	0.0000133	-4.228809808	0.000031	neg	ns	0.014729407	0.003882362	3.793929164	0.000178285	pos	ns	3.748885324	-0.000419382	0.000133514	-3.141104894	0.001845522	neg	ns	0.756876348	Mmp15	Mmp15_Exon	8	95368195	95368244	95368195	95368196	50	-	CGCAGATGAGCCCTGGACCTTCTCCAGCACTGACCTGCATGGTGAGGACA	Exon (Mmp15-201/Mmp15, exon 4 of 10)	8	95352268	95375080	22813	1	Mmp15-201	15927	Mmp15-201;Mmp15-202	Mmp15;Mmp15	0;-1627	TRUE
17050	cg06792724	-0.00001	0.0000172	-0.58301401	0.560307733	loss	ns	0.000123776	0.0000293	4.226843899	0.0000312	pos	ns	0.019301546	0.008579037	2.249850027	0.025159668	pos	ns	1.599295095	-0.0000679	0.000295032	-0.23020762	0.818082276	neg	ns	0.446262899	Il1rapl1	Il1rapl1_fiveUTR	X	88115557	88115606	88115557	88115558	50	-	CGGGATGCAGCCATAAGAAAGAATCCTATGTATATTTCACAAGTATCCCG	Promoter (<=1kb)	20	86740870	88115645	1374776	2	Il1rapl1-203	39	Il1rapl1-203;Il1rapl1-202	Il1rapl1;Il1rapl1	0;0	TRUE
9564	cg17548032	0.000146096	0.00000807	18.11384816	1.59E-50	gain	yes	-0.0000579	0.0000137	-4.22644133	0.0000313	neg	ns	0.00521006	0.004014249	1.297891742	0.195289401	pos	ns	0.709321326	0.000194769	0.00013805	1.410861695	0.159288119	pos	ns	0.271938994	Foxg1	Foxg1_Promoter	12	49381698	49381747	49381746	49381747	50	-	CATATCAGAGTACAAATAGTATAGTTACTCCACATCAGTAAATGTTTACG	Promoter (<=1kb)	12	49382660	49384364	1705	1	Foxg1-202	-962	Foxg1-202;Foxg1-203;Foxg1-204;Foxg1-201;Gm43517-201	Foxg1;Foxg1;Foxg1;Foxg1;Gm43517	0;-1053;0;0;0	TRUE
18241	cg09645993	0.000174843	0.0000105	16.62064983	8.44E-45	gain	yes	-0.0000754	0.0000179	-4.220189781	0.0000321	neg	ns	-0.008755923	0.005235724	-1.672342527	0.095465714	neg	ns	1.020152573	0.000162101	0.000180056	0.900281817	0.368669128	pos	ns	0.81988207	Ap3b1	Ap3b1_Intergenic_downstream	13	94576089	94576138	94576089	94576090	50	-	CGGTCCCATTGTTTGCCCTTGATGAGCATGTCATTAATGGAAATAGAAGA	Distal Intergenic	13	94542303	94547867	5565	1	Ap3b1-202	33835	NA	NA	NA	FALSE
5427	cg22745440	0.0000711	0.0000201	3.532495161	0.000474256	gain	ns	-0.000144353	0.0000342	-4.220366548	0.0000321	neg	ns	0.019767519	0.010020561	1.972695814	0.049418525	pos	ns	1.306110219	-0.001788483	0.000344606	-5.189931046	0.000000381	neg	yes	0.495854854	Rgl2	Rgl2_Exon	17	33932485	33932534	33932533	33932534	50	-	GCCTCTCACCCTGAGGATTTTGGCTCTGAGGCCAAGGGTCAGCTTGACCG	Exon (Rgl2-201/Rgl2, exon 6 of 18)	17	33929582	33937687	8106	1	Rgl2-201	2903	Rgl2-202;Rgl2-201;Rgl2-205;Rgl2-203;Rgl2-213;Rgl2-210;Rgl2-214;Rgl2-212;Rgl2-207;Rgl2-204;Rgl2-209;Rgl2-208;Rgl2-206;Rgl2-211;Tapbp-201;Tapbp-206;Tapbp-207;Tapbp-204	Rgl2;Rgl2;Rgl2;Rgl2;Rgl2;Rgl2;Rgl2;Rgl2;Rgl2;Rgl2;Rgl2;Rgl2;Rgl2;Rgl2;Tapbp;Tapbp;Tapbp;Tapbp	2942;0;2581;2511;0;1602;0;1577;1550;0;0;0;0;0;13153;12848;11958;6367	TRUE
7565	cg08530886	0.000000733	0.00000172	0.425425943	0.670821374	gain	ns	0.0000123	0.00000293	4.219454136	0.0000322	pos	ns	0.003213916	0.000857046	3.749991441	0.000210974	pos	ns	3.675770242	-0.0000593	0.0000295	-2.012108108	0.045073309	neg	ns	0.965527469	Zbtb20	Zbtb20_Intron	16	43254423	43254472	43254471	43254472	50	+	TCATTTTACATTATAAATAAATAACAAACCAATTTGGCACATGCCCACCG	Intron (Zbtb20-209/Zbtb20, intron 5 of 7)	16	42875881	43463175	587295	1	Zbtb20-209	378542	Zbtb20-209;Zbtb20-211;Zbtb20-217;Zbtb20-218;Zbtb20-204;Zbtb20-215;Zbtb20-212;Zbtb20-201;Zbtb20-203	Zbtb20;Zbtb20;Zbtb20;Zbtb20;Zbtb20;Zbtb20;Zbtb20;Zbtb20;Zbtb20	0;0;0;0;0;0;0;0;0	TRUE
23684	cg05659128	-0.00000298	0.00000401	-0.742894483	0.45810815	loss	ns	-0.0000287	0.00000681	-4.217672245	0.0000324	neg	ns	0.005245852	0.001995726	2.628542986	0.009002277	pos	ns	2.045647615	-0.000248304	0.0000686	-3.617860642	0.000346704	neg	ns	0.900837367	Ptpn4	Ptpn4_Exon	1	119802402	119802451	119802450	119802451	50	+	AACTCTGATGCTCGTACATTGTAGGTTCTGCCAGCAGGCAATCGGAAACG	Promoter (<=1kb)	1	119743405	119802422	59018	2	Ptpn4-210	0	Ptpn4-201;Ptpn4-203;Ptpn4-210;Ptpn4-207;Ptpn4-209;Ptpn4-205;Ptpn4-204	Ptpn4;Ptpn4;Ptpn4;Ptpn4;Ptpn4;Ptpn4;Ptpn4	0;0;0;0;0;0;0	TRUE
22133	cg23623568	-0.00000286	0.00000394	-0.725242595	0.46885031	loss	ns	0.0000282	0.00000669	4.218020056	0.0000324	pos	ns	0.004905771	0.001960759	2.501975679	0.012865249	pos	ns	1.89058182	-0.0000904	0.0000674	-1.340074451	0.181202531	neg	ns	0.934799703	Osbpl8	Osbpl8_Exon	10	111275019	111275068	111275019	111275020	50	+	CGTTTGAAGAAAGTAGTGAAATGGTATTTGTCAGGATTCTATAAAAAGCC	Exon (Osbpl8-202/Osbpl8, exon 13 of 24)	10	111164752	111297249	132498	1	Osbpl8-202	110267	Osbpl8-202;Osbpl8-201;Osbpl8-205	Osbpl8;Osbpl8;Osbpl8	0;0;0	TRUE
27117	cg08587172	0.00000548	0.0000234	0.234346521	0.814870672	gain	ns	-0.0001675	0.0000397	-4.216387163	0.0000326	neg	ns	-0.037415259	0.011638369	-3.214819951	0.001442869	neg	ns	2.840773173	0.001150656	0.000400243	2.874896252	0.004321214	pos	ns	0.505639141	Slc32a1	Slc32a1_Exon	2	158602834	158602883	158602882	158602883	50	-	GGCTTGTCCCAGTCCAATAGTTCCCTTAATTGCCTTTTTATAGCACGTCG	Promoter (7-8kb)	2	158610767	158615748	4982	1	Slc32a1-201	-7933	NA	NA	NA	TRUE
22808	cg07547913	0.0000277	0.0000143	1.933563655	0.054077014	gain	ns	0.000102683	0.0000244	4.215786097	0.0000327	pos	ns	0.011505259	0.007135719	1.612347509	0.10790389	pos	ns	0.966962898	0.0000639	0.000245397	0.260432752	0.794702884	pos	ns	0.324339059	Faah	Faah_Intron	4	115971650	115971699	115971650	115971651	50	-	CGAGTTTGCATTTTAAATGCGAATTTGACAAGACGGGCAATTTGTCTGCT	Intron (Faah-202/Faah, intron 13 of 14)	4	115967145	116017675	50531	2	Faah-202	45976	Faah-202	Faah	0	TRUE
19196	cg14346040	0.00000683	0.00000736	0.92838613	0.353929601	gain	ns	-0.0000527	0.0000125	-4.215030978	0.0000328	neg	ns	0.009765475	0.003660713	2.667642887	0.00803997	pos	ns	2.094745545	-0.000654783	0.000125892	-5.201167658	0.000000361	neg	yes	0.755207888	Nr1d1	Nr1d1_Exon	11	98769178	98769227	98769226	98769227	50	+	GCAGGCTGTAGGTGGTGCGGCTTAGGAACATCACTGTCTGGTCCTTCACG	Exon (Nr1d1-201/Nr1d1, exon 7 of 8)	11	98767932	98775333	7402	2	Nr1d1-201	6106	Nr1d1-201;Nr1d1-202;Thra-201;Thra-202;Thra-203	Nr1d1;Nr1d1;Thra;Thra;Thra	0;1199;0;0;0	TRUE
20491	cg08638594	0.0000278	0.00000588	4.723176045	0.00000352	gain	ns	0.0000421	0.00000999	4.214050561	0.0000329	pos	ns	0.007829058	0.002927214	2.67457684	0.007879318	pos	ns	2.103511357	-0.0000693	0.000100667	-0.6888113	0.491457206	neg	ns	0.539080036	Mier1	Mier1_fiveUTR	4	103115574	103115623	103115574	103115575	50	+	CGATTCTCCCAGTGCCTGGCTGAGTTTCGGACGTGGTTAAGAACCAACTG	5' UTR	4	103114390	103115904	1515	1	Mier1-209	1184	Mier1-209;Mier1-205;Mier1-210;Mier1-214;Mier1-211;Mier1-212;Mier1-208;Mier1-201;Mier1-202;Mier1-213;Mier1-204;Mier1-215;Mier1-206;Wdr78-201;Wdr78-202;Wdr78-204;Wdr78-203	Mier1;Mier1;Mier1;Mier1;Mier1;Mier1;Mier1;Mier1;Mier1;Mier1;Mier1;Mier1;Mier1;Wdr78;Wdr78;Wdr78;Wdr78	0;0;0;0;0;0;0;0;0;-1672;0;0;0;-1275;-1275;-1350;-1019	TRUE
13938	cg08675781	-0.00000454	0.00000297	-1.531261093	0.126724688	loss	ns	0.0000212	0.00000504	4.213526195	0.000033	pos	ns	0.001100144	0.001475934	0.745388043	0.456601942	pos	ns	0.340462246	0.00000736	0.0000508	0.144997059	0.884807419	pos	ns	0.950629505	Atp2b3	Atp2b3_Exon	X	73559915	73559964	73559915	73559916	50	+	CGCCGGCGGTCTTCGGTCCTCAGCCAGCTTCATGACGTAACCAATCTTTC	Exon (Atp2b3-203/Atp2b3, exon 21 of 22)	20	73503086	73571005	67920	1	Atp2b3-202	56829	Atp2b3-201;Atp2b3-202;Atp2b3-203	Atp2b3;Atp2b3;Atp2b3	0;0;0	TRUE
12067	cg01710150	0.000011	0.00000764	1.440780772	0.150655877	gain	ns	-0.0000547	0.000013	-4.213334178	0.000033	neg	ns	0.022142491	0.003804145	5.820621751	1.46E-08	pos	ns	7.83471638	-0.000758701	0.000130824	-5.799390297	1.64E-08	neg	yes	0.149555311	Nrp2	Nrp2_Intron	1	62704529	62704578	62704529	62704530	50	+	CGGTGTTCATATGTCACATATGGACTGAATCAAAGGTTTAAAAATACTAC	Intron (Nrp2-207/Nrp2, intron 1 of 2)	1	62703285	62739932	36648	1	Nrp2-207	1244	Nrp2-207;Nrp2-203;Nrp2-204;Nrp2-201;Nrp2-205;Nrp2-202;Nrp2-206	Nrp2;Nrp2;Nrp2;Nrp2;Nrp2;Nrp2;Nrp2	0;0;0;0;0;0;0	TRUE
14479	cg02990488	-0.0000208	0.00000584	-3.56661077	0.000418749	loss	ns	-0.0000418	0.00000992	-4.212511087	0.0000331	neg	ns	0.011291635	0.002907541	3.883567948	0.000125842	pos	ns	3.900173336	-0.000327842	0.0001	-3.278748524	0.001161245	neg	ns	0.877417086	Smarcb1	Smarcb1_Exon	10	75916729	75916778	75916729	75916730	50	-	CGAGTGGTTTTGAAACAGGTTTACAAACCCTCGTGAAGACGCACCCTTAG	Exon (Smarcb1-201/Smarcb1, exon 2 of 9)	10	75896769	75921617	24849	2	Smarcb1-201	4839	Smarcb1-201;Smarcb1-203;Smarcb1-205;Smarcb1-202;Smarcb1-204;Smarcb1-206	Smarcb1;Smarcb1;Smarcb1;Smarcb1;Smarcb1;Smarcb1	0;-2567;-157;0;0;-1565	TRUE
2842	cg23407421	-0.0000054	0.00000833	-0.648103357	0.517397837	loss	ns	0.0000596	0.0000141	4.21249187	0.0000331	pos	ns	0.007133458	0.004144748	1.72108376	0.086233348	pos	ns	1.064324752	0.0000809	0.000142538	0.567909808	0.570507299	pos	ns	0.869284043	Zfp503	Zfp503_Intergenic_downstream	14	21967645	21967694	21967645	21967646	50	-	CGATGTTGATTTTATCTCCCGAGATTAGCATGATTTACTTCGGATGGATA	Distal Intergenic	14	21983959	21989601	5643	2	Zfp503-201	21956	NA	NA	NA	FALSE
12775	cg14792969	-0.0000278	0.0000178	-1.567184837	0.118091659	loss	ns	0.000127106	0.0000302	4.212058378	0.0000332	pos	ns	0.028905841	0.008840763	3.269609344	0.001198109	pos	ns	2.921503561	-0.000408962	0.000304033	-1.34512301	0.179568693	neg	ns	0.839570018	Rsrc1	Rsrc1_Intron	3	67147384	67147433	67147384	67147385	50	+	CGGCCTTATTGAATGGAATAACAGTGTAATGTACCATTGAAGGCAGGATT	Intron (Rsrc1-206/Rsrc1, intron 4 of 9)	3	66981390	67356559	375170	1	Rsrc1-206	165994	Rsrc1-206;Rsrc1-203;Rsrc1-202;Rsrc1-201;Rsrc1-209;Rsrc1-205	Rsrc1;Rsrc1;Rsrc1;Rsrc1;Rsrc1;Rsrc1	0;0;0;0;0;0	TRUE
21001	cg01432400	-0.0000381	0.0000169	-2.256111507	0.024760232	loss	ns	0.000120725	0.0000287	4.210414331	0.0000334	pos	ns	0.017443833	0.008400186	2.076600885	0.038661954	pos	ns	1.412716197	-0.000316688	0.000288882	-1.096254925	0.273818116	neg	ns	0.607850848	Vrk1	Vrk1_Intergenic_upstream	12	105960104	105960153	105960104	105960105	50	+	CGCAGTTAACAATTAGCAATTAAACCTGCAGTGTCTACAAAGAGCACGGA	Distal Intergenic	12	106010228	106075220	64993	1	Vrk1-202	-50075	NA	NA	NA	FALSE
23613	cg05341636	0.000031	0.0000121	2.568807251	0.010672708	gain	ns	0.0000864	0.0000205	4.208857615	0.0000337	pos	ns	0.023847067	0.006013938	3.965299885	0.0000911	pos	ns	4.040590998	-0.000436424	0.000206819	-2.110175611	0.035644181	neg	ns	0.17622592	Dll4	Dll4_Promoter	2	119322613	119322662	119322613	119322614	50	-	CGCCGGCCTCATTTCAATGTGAATGGATCGAATGGAGCAGCCATGTGGCA	Promoter (3-4kb)	2	119325784	119335962	10179	1	Dll4-201	-3171	Dll4-201	Dll4	0	TRUE
21465	cg25729109	0.00000949	0.00000534	1.777935945	0.076394552	gain	ns	0.0000382	0.00000907	4.208526242	0.0000337	pos	ns	0.002134947	0.002655928	0.803842434	0.422103941	pos	ns	0.374580593	0.0000236	0.0000913	0.258921322	0.795867787	pos	ns	0.89411134	Bcl11b	Bcl11b_Exon	12	107915453	107915502	107915453	107915454	50	+	CGTGCCACTTTTTCATGTGTTTCTCCAGGGTGCTGTAGACGCTGAAGGGC	Exon (Bcl11b-201/Bcl11b, exon 4 of 4)	12	107910403	108003602	93200	2	Bcl11b-201	88100	Bcl11b-201;Bcl11b-202;Bcl11b-203	Bcl11b;Bcl11b;Bcl11b	0;0;0	TRUE
7152	cg08579332	-0.00020433	0.0000161	-12.71739059	4.21E-30	loss	yes	0.00011485	0.0000273	4.207645807	0.0000338	pos	ns	0.037225585	0.007996705	4.655115197	0.00000481	pos	ns	5.318121024	-0.001300865	0.000275006	-4.730315803	0.00000341	neg	ns	0.335132451	Immp2l	Immp2l_fiveUTR	12	41485926	41485975	41485926	41485927	50	+	CGTTCACCCGATCAGTTGTCACACTGACATGGTGCTGCCTGCTCAGCGGT	5' UTR	12	41024090	41955588	931499	1	Immp2l-202	461836	Immp2l-202;Immp2l-203;Lrrn3-201	Immp2l;Immp2l;Lrrn3	0;0;0	TRUE
24830	cg02164420	0.000026	0.00000439	5.927793278	8.18E-09	gain	yes	-0.0000314	0.00000746	-4.206803162	0.0000339	neg	ns	0.009211077	0.002186717	4.21228606	0.0000332	pos	ns	4.479148579	-0.000346813	0.0000752	-4.611817729	0.00000585	neg	ns	0.906831351	Phc2	Phc2_threeUTR	4	128745828	128745877	128745876	128745877	50	+	GAGCTCTGTGGCCGGGTGGACTTTGCCTATAAGTTCAAGCGTTCCAAGCG	3' UTR	4	128654702	128752881	98180	1	Phc2-201	91126	Phc2-201;Phc2-203;Phc2-209;Phc2-202;Phc2-208;Phc2-205;Phc2-210;Phc2-204;Phc2-206	Phc2;Phc2;Phc2;Phc2;Phc2;Phc2;Phc2;Phc2;Phc2	0;0;0;0;0;0;0;0;0	TRUE
861	cg07131970	0.0000283	0.00000634	4.457963344	0.0000116	gain	ns	-0.0000453	0.0000108	-4.205562896	0.0000341	neg	ns	-0.007099199	0.003155006	-2.250138028	0.025141173	neg	ns	1.599614457	-0.000212954	0.0001085	-1.962705841	0.050574399	neg	ns	0.800383025	Larp4b	Larp4b_Exon	13	9143792	9143841	9143792	9143793	50	-	CGAGAAGTACTTAAAAAAACATTGGAATTCTGCTTATCTAGGTAAGGCTG	Exon (Larp4b-202/Larp4b, exon 6 of 18)	13	9093881	9173988	80108	1	Larp4b-202	49911	Gm28155-201;Larp4b-202;Larp4b-204;Larp4b-201;Larp4b-203	Gm28155;Larp4b;Larp4b;Larp4b;Larp4b	-2911;0;0;0;7577	TRUE
27458	cg05112916	0.00000305	0.00000381	0.799537154	0.424591216	gain	ns	0.0000272	0.00000647	4.204222728	0.0000343	pos	ns	0.009439348	0.001896706	4.976706527	0.00000107	pos	ns	5.968786169	-0.000215269	0.0000652	-3.300283605	0.001078506	neg	ns	0.904452562	Pbx1	Pbx1_Intron	1	168275925	168275974	168275925	168275926	50	+	CGGCAGCTTATGATTATCCAGCGCTACAGACTATACAATTCCAGCTTCAT	Intron (Pbx1-208/Pbx1, intron 2 of 7)	1	168119364	168432270	312907	2	Pbx1-208	156296	Pbx1-208;Pbx1-205;Pbx1-206;Pbx1-201;Pbx1-202;Pbx1-204	Pbx1;Pbx1;Pbx1;Pbx1;Pbx1;Pbx1	0;0;0;0;0;0	TRUE
23375	cg11421980	-0.0000188	0.00000609	-3.081327583	0.002245668	loss	ns	0.0000435	0.0000104	4.203496607	0.0000344	pos	ns	-0.001131166	0.003032444	-0.373021276	0.709387538	neg	ns	0.149116445	0.000156748	0.000104286	1.503063246	0.133840742	pos	ns	0.889111567	Sox21	Sox21_Intergenic_downstream	14	118194840	118194889	118194888	118194889	50	+	CAATTTAATGACATTACAGCTCTCAGCTTAGGCTGGCGTGCTGCGAGGCG	Distal Intergenic	14	118233232	118237030	3799	2	Sox21-201	42141	NA	NA	NA	FALSE
17844	cg08535442	-0.00000744	0.00000289	-2.569847145	0.010641406	loss	ns	-0.0000206	0.00000492	-4.198995352	0.0000351	neg	ns	-0.004310176	0.001440657	-2.991812409	0.002995899	neg	ns	2.523472842	0.00000766	0.0000495	0.154664817	0.877186215	pos	ns	0.898492674	G3bp2	G3bp2_Exon	5	92066491	92066540	92066539	92066540	50	+	CCTTCATCAAGTTCAGGCTCAGAATCACCAAACACTTCATCTTCATAACG	Exon (G3bp2-203/G3bp2, exon 5 of 11)	5	92052146	92083557	31412	2	G3bp2-203	17017	G3bp2-203;G3bp2-201;G3bp2-202;G3bp2-204;G3bp2-209;G3bp2-210;G3bp2-206;G3bp2-207;G3bp2-205;G3bp2-208	G3bp2;G3bp2;G3bp2;G3bp2;G3bp2;G3bp2;G3bp2;G3bp2;G3bp2;G3bp2	0;0;0;0;0;0;0;0;0;0	TRUE
299	cg24276148	-0.0000196	0.00000463	-4.23091125	0.0000307	loss	ns	-0.000033	0.00000786	-4.197573032	0.0000353	neg	ns	0.00566114	0.002304162	2.45691981	0.01456106	pos	ns	1.836807014	-0.000292484	0.0000792	-3.691119688	0.000263705	neg	ns	0.820804808	U2af2	U2af2_fiveUTR	7	5068711	5068760	5068759	5068760	50	-	TTGTTTCCATTTCTCTTTAAAGTGAAATATTGTGGGGCTGAGATCCCTCG	5' UTR	7	5062143	5079938	17796	1	U2af2-201	6568	U2af2-201;U2af2-209;U2af2-203;U2af2-207;U2af2-208;U2af2-205;U2af2-204;U2af2-202;U2af2-206	U2af2;U2af2;U2af2;U2af2;U2af2;U2af2;U2af2;U2af2;U2af2	0;0;6436;6428;6419;6407;0;0;0	TRUE
26855	cg22167768	0.000049	0.0000177	2.773994804	0.005872982	gain	ns	-0.000125932	0.00003	-4.197747968	0.0000353	neg	ns	-0.025667283	0.00878896	-2.920400481	0.003752216	neg	ns	2.425712187	0.000138265	0.000302252	0.457450004	0.647668059	pos	ns	0.351084715	Nol4l	Nol4l_Exon	2	153483759	153483808	153483759	153483760	50	-	CGAGTAGATGATGTCAAAGAAATCTTCCACCACAGCGACCCGCTTCAGAG	Exon (Nol4l-201/Nol4l, exon 2 of 11)	2	153407462	153529971	122510	2	Nol4l-201	46163	Nol4l-201;Nol4l-205;Nol4l-203;Nol4l-206	Nol4l;Nol4l;Nol4l;Nol4l	0;0;0;-4033	TRUE
15854	cg13463879	-0.00000354	0.00000873	-0.405815599	0.685158055	loss	ns	0.0000623	0.0000148	4.195715502	0.0000356	pos	ns	0.014266039	0.004347228	3.281640466	0.001149801	pos	ns	2.939377132	-0.000327203	0.000149501	-2.188636885	0.029369063	neg	ns	0.81184314	Mef2c	Mef2c_threeUTR	13	83662906	83662955	83662954	83662955	50	-	CTTTGCAAAATGTATGTTACAATAGATAGTGTCATGTTGCAGGTTCAACG	3' UTR	13	83504034	83663343	159310	1	Mef2c-218	158872	Mef2c-218;Mef2c-228;Mef2c-201;Mef2c-202;Mef2c-222;Mef2c-223;Mef2c-227;Mef2c-213;Mef2c-214;Mef2c-212;Mef2c-203;Mef2c-219;Mef2c-225;Mef2c-230;Mef2c-211	Mef2c;Mef2c;Mef2c;Mef2c;Mef2c;Mef2c;Mef2c;Mef2c;Mef2c;Mef2c;Mef2c;Mef2c;Mef2c;Mef2c;Mef2c	0;0;0;0;0;0;0;0;0;0;0;0;0;0;0	TRUE
4932	cg12787746	0.0000226	0.0000051	4.431877308	0.000013	gain	ns	-0.0000364	0.00000867	-4.193441439	0.0000359	neg	ns	0.006130586	0.002540597	2.413049099	0.016399616	pos	ns	1.78516632	-0.000272719	0.0000874	-3.121389699	0.001969573	neg	ns	0.891356654	Marchf6	Marchf6_Exon	15	31471716	31471765	31471764	31471765	50	-	ATAGAGACCACAAGCAGCTGTGTAGAGCTCATGGATTTTGGCAGTCCCCG	Exon (Marchf6-201/Marchf6, exon 21 of 26)	15	31455891	31531053	75163	2	Marchf6-201	59288	Marchf6-201;Marchf6-203	Marchf6;Marchf6	0;0	TRUE
4117	cg02894327	-0.00000705	0.00000327	-2.15834467	0.031668482	loss	ns	0.0000233	0.00000555	4.192417686	0.0000361	pos	ns	0.004810517	0.001625296	2.959778408	0.00331598	pos	ns	2.479388066	-0.000137562	0.0000559	-2.461135442	0.014394392	neg	ns	0.914085427	Gm12072	Gm12072_Promoter	11	26824640	26824689	26824688	26824689	50	+	TTCGATTTAACCATCTGATTTAATTGACAGAATAAATGCACCTGTCAACG	Promoter (8-9kb)	11	26832804	26845457	12654	1	Gm12072-201	-8115	NA	NA	NA	FALSE
9438	cg05847200	0.00000951	0.00000763	1.246218933	0.213624956	gain	ns	0.0000543	0.000013	4.192242558	0.0000361	pos	ns	0.000185934	0.003796183	0.048979297	0.960967335	pos	ns	0.017291374	0.000166787	0.00013055	1.277566847	0.202358118	pos	ns	0.517332504	Gm48909	Gm48909_Intron	14	48738291	48738340	48738339	48738340	50	-	CCTACACAGTGGAACAAAGCCCAGCAAAGCCTTTGAACACTGTTCAGCCG	Intron (Otx2os1-206/Otx2os1-206, intron 2 of 4)	14	48695601	48695981	381	2	Gm48909-201	-42359	NA	NA	NA	TRUE
18284	cg12983763	-0.00000649	0.0000173	-0.375135284	0.707816384	loss	ns	0.000123263	0.0000294	4.191108331	0.0000362	pos	ns	0.011221895	0.008616299	1.302403159	0.193745366	pos	ns	0.712768677	-0.000355951	0.000296314	-1.201264727	0.230565505	neg	ns	0.598134992	Gm48316	Gm48316_Intergenic_upstream	13	94680629	94680678	94680677	94680678	50	+	TGGACATTCAAATGTGTCGGCTTTGATTAGCACCATTGCTTTTCAAGTCG	Distal Intergenic	13	94752270	94752593	324	1	Gm48316-201	-71592	NA	NA	NA	FALSE
23049	cg25000361	0.0000122	0.00000867	1.406446365	0.160593251	gain	ns	-0.0000617	0.0000147	-4.186317012	0.000037	neg	ns	0.029285362	0.004317582	6.78281624	5.98E-11	pos	yes	10.22362929	-0.000595555	0.000148481	-4.010979558	0.0000758	neg	ns	0.731121099	Cxcl12	Cxcl12_Exon	6	117176090	117176139	117176090	117176091	50	-	CGCAGAGAAGAAAAAGTGGGGAAAAAAGAAAAGATAGGAAAAAAGAAGCG	Exon (Cxcl12-204/Cxcl12, exon 3 of 3)	6	117168574	117181366	12793	1	Cxcl12-203	7516	Cxcl12-202;Cxcl12-203;Cxcl12-204;Cxcl12-201	Cxcl12;Cxcl12;Cxcl12;Cxcl12	0;0;0;0	TRUE
11104	cg15831187	-0.0000078	0.0000131	-0.597671135	0.550495726	loss	ns	0.0000928	0.0000222	4.185378399	0.0000371	pos	ns	0.027905424	0.006496223	4.295638385	0.0000233	pos	ns	4.631937203	-0.000435533	0.000223405	-1.949527126	0.052133964	neg	ns	0.734194335	Lingo1	Lingo1_Exon	9	56619845	56619894	56619845	56619846	50	+	CGTTGTCCTGTACCTGGGCGTAGCGCACCTCCAGCGTGCCATCAGGGAAG	Exon (Lingo1-201/Lingo1, exon 4 of 4)	9	56618475	56685253	66779	2	Lingo1-201	65359	Lingo1-201;Lingo1-206;Lingo1-203;Lingo1-202	Lingo1;Lingo1;Lingo1;Lingo1	0;0;0;0	TRUE
14349	cg18527971	-0.0000328	0.0000105	-3.11871996	0.00198695	loss	ns	0.0000747	0.0000179	4.184196635	0.0000373	pos	ns	-0.001120919	0.005231473	-0.214264546	0.830481632	neg	ns	0.080669969	0.0000748	0.00017991	0.415702126	0.677915593	pos	ns	0.281706083	Gm13653	Gm13653_Intron	2	75246418	75246467	75246466	75246467	50	+	AGAACATTGCATTTCATGTGGAATGTCAATTATTAAAATGCAGTGTCCCG	Intron (2600014E21Rik-210/2600014E21Rik-210, intron 2 of 6)	2	75192277	75192759	483	1	Gm13653-201	54141	NA	NA	NA	TRUE
2920	cg07549765	0.0000716	0.00000428	16.70645458	3.96E-45	gain	yes	-0.0000304	0.00000728	-4.1809906	0.0000378	neg	ns	-0.003843677	0.00213173	-1.80307835	0.072346866	neg	ns	1.140580277	0.000129249	0.0000733	1.763048468	0.078877537	pos	ns	0.896656271	Ehbp1	Ehbp1_Exon	11	22053471	22053520	22053471	22053472	50	+	CGGCACGGGTGTCAATTTGCTTTTGCTCATTCTCTAGTGCTGCCAATTCT	Exon (Ehbp1-201/Ehbp1, exon 20 of 24)	11	22005828	22285838	280011	2	Ehbp1-201	232318	Ehbp1-201;Ehbp1-202;Ehbp1-207	Ehbp1;Ehbp1;Ehbp1	0;0;0	TRUE
12039	cg02323424	0.0000454	0.00000471	9.638263386	2.12E-19	gain	yes	-0.0000334	0.000008	-4.180867103	0.0000378	neg	ns	-0.004348706	0.002342301	-1.856595808	0.064317215	neg	ns	1.191672766	0.000148058	0.0000806	1.838056655	0.067010775	pos	ns	0.857396446	Fbxo38	Fbxo38_Exon	18	62515046	62515095	62515046	62515047	50	+	CGGCTGGTTGAAGGACGTTCCTCATCAGAACACCTGCTAGTTCTCCTTTG	Exon (Fbxo38-201/Fbxo38, exon 15 of 22)	18	62504155	62548695	44541	2	Fbxo38-201	33600	Fbxo38-201;Fbxo38-203;Fbxo38-204	Fbxo38;Fbxo38;Fbxo38	0;0;5634	TRUE
19589	cg05612157	0.00000651	0.00000874	0.745244414	0.456688623	gain	ns	0.0000621	0.0000148	4.180314313	0.0000379	pos	ns	0.018333799	0.00434885	4.215780693	0.0000327	pos	ns	4.485506159	-0.000395041	0.000149557	-2.641416911	0.008674586	neg	ns	0.41236882	Eda	Eda_Promoter	X	99976604	99976653	99976652	99976653	50	+	GGCTCCCCTTTGGAGTTGGAGCTGTAAACAGCTGTAATAACTGTTCCACG	Promoter (<=1kb)	20	99975606	100311299	335694	1	Eda-211	998	Eda-211;Eda-208;Eda-209;Eda-202;Eda-203;Eda-206;Eda-205;Eda-207;Eda-204;Eda-201	Eda;Eda;Eda;Eda;Eda;Eda;Eda;Eda;Eda;Eda	0;0;0;0;0;0;0;0;0;0	TRUE
1665	cg05120647	0.0000211	0.00000741	2.851345147	0.00464561	gain	ns	0.0000526	0.0000126	4.179659617	0.000038	pos	ns	0.008545281	0.003686155	2.318209848	0.021088402	pos	ns	1.675956325	-0.0000788	0.000126767	-0.621903723	0.53446228	neg	ns	0.114821311	Gm26993	Gm26993_Intergenic_upstream	19	14124090	14124139	14124138	14124139	50	-	AGAACATCGGAAACAGGACAAAATAGCCTTCTTGAAGCTGAAATCCCTCG	Distal Intergenic	19	14017583	14018371	789	2	Gm26993-201	-105768	NA	NA	NA	FALSE
837	cg10118204	-0.0000794	0.0000113	-7.046976977	1.19E-11	loss	yes	-0.00008	0.0000191	-4.178944619	0.0000381	neg	ns	0.005149212	0.00560985	0.917887788	0.359391191	pos	ns	0.444432572	-0.001585965	0.000192922	-8.220748397	5.60E-15	neg	yes	0.433468552	Abcb4	Abcb4_Exon	5	8909167	8909216	8909167	8909168	50	-	CGTTTTTTGCAGGATTCATAGTGGGATTCATCAGAGGATGGAAGCTCACC	Exon (Abcb4-201/Abcb4, exon 7 of 28)	5	8893717	8959226	65510	1	Abcb4-201	15450	Abcb4-201;Abcb4-202;Gm17936-201	Abcb4;Abcb4;Gm17936	0;0;-3755	TRUE
8383	cg05152013	0.0000441	0.00000763	5.77895086	1.83E-08	gain	yes	-0.0000541	0.000013	-4.17753672	0.0000384	neg	ns	-0.004101447	0.003797385	-1.080071506	0.280949915	neg	ns	0.551371095	0.000057	0.000130592	0.436822983	0.662543837	pos	ns	0.581206747	Zeb2	Zeb2_Intron	2	45073182	45073231	45073230	45073231	50	+	GTGACAATTAGTTTCAGGTGAGCTGATTTCTATGCAGCTTGCCCAAGACG	Intron (Zeb2-212/Zeb2, intron 3 of 10)	2	44983632	45117395	133764	2	Zeb2-212	44164	Zeb2-212;Zeb2-213;Zeb2-201;Zeb2-202;Zeb2-215;Zeb2-214;Zeb2-203;Zeb2-221;Zeb2-220;Zeb2-216;Zeb2-222;Zeb2-208;Zeb2-228;Zeb2-226;Zeb2-209;Zeb2-224;Zeb2-207;Zeb2-219	Zeb2;Zeb2;Zeb2;Zeb2;Zeb2;Zeb2;Zeb2;Zeb2;Zeb2;Zeb2;Zeb2;Zeb2;Zeb2;Zeb2;Zeb2;Zeb2;Zeb2;Zeb2	0;0;0;0;0;0;0;0;0;0;0;0;0;0;0;0;0;0	TRUE
21951	cg22779638	0.0000011	0.00000547	0.201853069	0.840163987	gain	ns	0.0000388	0.00000929	4.177288024	0.0000384	pos	ns	0.016610591	0.002721384	6.10372859	3.09E-09	pos	ns	8.509815699	-0.000283938	0.0000936	-3.033910179	0.002618311	neg	ns	0.872336465	Faf1	Faf1_Intron	4	109806381	109806430	109806429	109806430	50	+	TGGCAGTTACATATCAAACCTCACGGGGGTTTGACAGGCAACGAATATCG	Intron (Faf1-201/Faf1, intron 8 of 18)	4	109676588	109963960	287373	1	Faf1-201	129793	Faf1-201	Faf1	0	TRUE
6740	cg13763783	-0.00000948	0.00000294	-3.225888519	0.001389971	loss	ns	0.0000209	0.00000499	4.176665301	0.0000385	pos	ns	0.003395163	0.001463173	2.320410891	0.020967503	pos	ns	1.678453286	-0.0000347	0.0000503	-0.690585064	0.490343069	neg	ns	0.047417084	Lgi1	Lgi1_Promoter	19	38264484	38264533	38264532	38264533	50	+	AATAAGACATAATGCCGTCCTATTTTTGGTAACAATTAAAGGGCCTCCCG	Promoter (<=1kb)	19	38264536	38312214	47679	1	Lgi1-207	-3	Lgi1-207;Lgi1-201;Lgi1-209;Lgi1-206;Lgi1-205;Lgi1-204;Lgi1-208;Lgi1-203;Lgi1-202	Lgi1;Lgi1;Lgi1;Lgi1;Lgi1;Lgi1;Lgi1;Lgi1;Lgi1	0;0;0;0;0;0;0;0;0	FALSE
5102	cg21642467	-0.0000198	0.0000148	-1.338113841	0.181840013	loss	ns	0.000104972	0.0000251	4.174879182	0.0000388	pos	ns	0.035773814	0.007366278	4.856430067	0.0000019	pos	ns	5.721425017	-0.000981727	0.000253326	-3.875353266	0.00012996	neg	ns	0.318843422	Dnm1	Dnm1_Exon	2	32318519	32318568	32318567	32318568	50	-	ATTGTACAGTAGTCTGCACATTGGTTAGGCTGGGCTGGGTTAGACCCTCG	Exon (Mir199b-201/Mir199b-201, exon 1 of 1)	2	32308471	32353263	44793	2	Dnm1-204	34695	Dnm1-204;Dnm1-209;Dnm1-202;Dnm1-201;Dnm1-203;Dnm1-205;Dnm1-214;Dnm1-206;Dnm1-216;Dnm1-217;Dnm1-213	Dnm1;Dnm1;Dnm1;Dnm1;Dnm1;Dnm1;Dnm1;Dnm1;Dnm1;Dnm1;Dnm1	0;0;0;0;0;0;0;0;0;0;-1188	TRUE
14715	cg03064443	0.000132496	0.0000208	6.366926019	6.94E-10	gain	yes	-0.000147557	0.0000354	-4.173742905	0.000039	neg	ns	0.098644476	0.010357389	9.524067622	4.97E-19	pos	yes	18.30339048	-0.001594597	0.00035619	-4.476819906	0.0000107	neg	ns	0.416574094	Zfp385b	Zfp385b_Exon	2	77450200	77450249	77450248	77450249	50	+	ATTAGCCTTTGCGCTGTCCTTGGAAGGAACCATTTTGGGTTTATTTTTCG	Exon (Zfp385b-203/Zfp385b, exon 4 of 8)	2	77410634	77519618	108985	2	Zfp385b-203	69369	Zfp385b-203;Zfp385b-211;Zfp385b-201;Zfp385b-204;Zfp385b-209;Zfp385b-207	Zfp385b;Zfp385b;Zfp385b;Zfp385b;Zfp385b;Zfp385b	0;0;0;0;0;0	TRUE
12805	cg23832187	-0.0000496	0.0000177	-2.804480012	0.00535789	loss	ns	0.000125282	0.0000301	4.166869063	0.0000401	pos	ns	-0.009778793	0.008808367	-1.110170943	0.267785761	neg	ns	0.57221252	0.000463013	0.000302919	1.528504007	0.127407143	pos	ns	0.247642537	Tmem33	Tmem33_Intergenic_upstream	5	67222098	67222147	67222146	67222147	50	-	GCATTGTTGGCCTGAAAGGATATCTATTTATCATCTTATAAGACAGCTCG	Distal Intergenic	5	67260565	67291461	30897	1	Tmem33-201	-38467	NA	NA	NA	FALSE
24592	cg18508905	0.0000715	0.00000761	9.399264997	1.26E-18	gain	yes	-0.0000538	0.0000129	-4.16241431	0.0000408	neg	ns	-0.011088924	0.003786566	-2.928490677	0.003658529	neg	ns	2.436693472	0.000257219	0.00013022	1.975273146	0.049123959	pos	ns	0.82722763	Sfpq	Sfpq_Exon	4	127035428	127035477	127035428	127035429	50	-	CGTTGTCACATACCTTCACATAAGGGATAGTATATTTTGGGTTGCAGTCA	Exon (Gm12940-201/Gm12940-201, exon 1 of 3)	4	127023527	127037013	13487	1	Sfpq-206	11901	Sfpq-201;Sfpq-206	Sfpq;Sfpq	0;0	TRUE
22730	cg23282125	0.0000427	0.00000503	8.493621912	8.48E-16	gain	yes	-0.0000355	0.00000854	-4.159526022	0.0000413	neg	ns	-0.007627748	0.002501935	-3.048739403	0.002496074	neg	ns	2.602742465	0.000348744	0.000086	4.053216981	0.0000639	pos	ns	0.862465261	Mknk1	Mknk1_Intron	4	115863982	115864031	115864030	115864031	50	+	CAGAGAGTGCTCACCGGGGAAGGCCACAAGTGCTACAGTGGCCAGGAACG	Intron (Mknk1-201/Mknk1, intron 5 of 12)	4	115839198	115879250	40053	1	Mknk1-201	24784	Mknk1-201;Mknk1-207;Mknk1-208;Mknk1-212;Mknk1-202;Mknk1-203;Mknk1-210;Mknk1-206;Mknk1-211;Mknk1-209;Mknk1-213	Mknk1;Mknk1;Mknk1;Mknk1;Mknk1;Mknk1;Mknk1;Mknk1;Mknk1;Mknk1;Mknk1	0;0;0;0;0;0;0;24722;0;0;-2236	TRUE
26643	cg03836368	0.0000281	0.00000588	4.785511751	0.00000264	gain	ns	-0.0000415	0.00000999	-4.158990568	0.0000414	neg	ns	0.007850428	0.002925748	2.683220784	0.007683096	pos	ns	2.114463723	-0.000184451	0.000100616	-1.83321218	0.067729808	neg	ns	0.859437683	Pex14	Pex14_Intron	4	149061998	149062047	149062046	149062047	50	-	AAATACAGATCTTTTCTGTAACAGTCAATATGACAGCTCCCGGCAATACG	Intron (Pex14-201/Pex14, intron 2 of 8)	4	148960535	149099876	139342	2	Pex14-201	37829	Pex14-201;Pex14-202;Pex14-205;Pex14-203;Pex14-204	Pex14;Pex14;Pex14;Pex14;Pex14	0;0;0;0;0	TRUE
6464	cg15369744	0.00000733	0.00000254	2.882884458	0.00421596	gain	ns	-0.0000179	0.00000432	-4.154151332	0.0000423	neg	ns	-0.003182539	0.001265718	-2.514414748	0.012429111	neg	ns	1.905559935	0.0000934	0.0000435	2.146141826	0.032637701	pos	ns	0.952499452	Zfp536	Zfp536_Intron	7	37364368	37364417	37364416	37364417	50	-	GCAACATAATACCAGTCTTTATTCAGTAACAATGTAACATAATGAGATCG	Intron (Zfp536-211/Zfp536, intron 3 of 3)	7	37318024	37568390	250367	2	Zfp536-211	203973	Zfp536-211	Zfp536	0	TRUE
9395	cg21329721	0.000000337	0.0000174	0.019384834	0.984546579	gain	ns	0.000122469	0.0000295	4.152631877	0.0000425	pos	ns	0.018551374	0.008640105	2.147123574	0.032558792	pos	ns	1.487331723	-0.000178866	0.000297133	-0.601973214	0.547631978	neg	ns	0.446799138	Slc25a14	Slc25a14_fiveUTR	X	48624139	48624188	48624187	48624188	50	-	TCTTTCCCGGAATAATCCTAATTTTTCTAAGGGTGAAGTTTGCAACGGCG	Promoter (<=1kb)	20	48623413	48631036	7624	1	Slc25a14-203	726	Slc25a14-203;Slc25a14-201;Slc25a14-204;Slc25a14-205;Slc25a14-207;Slc25a14-202;Slc25a14-206;Slc25a14-208	Slc25a14;Slc25a14;Slc25a14;Slc25a14;Slc25a14;Slc25a14;Slc25a14;Slc25a14	0;0;0;0;0;0;0;0	TRUE
5707	cg19109725	0.00022128	0.0000198	11.17519072	1.37E-24	gain	yes	-0.000139678	0.0000336	-4.152215765	0.0000426	neg	ns	0.07650405	0.009855171	7.762833626	1.22E-13	pos	yes	12.9145251	-0.002000124	0.000338919	-5.901488586	9.44E-09	neg	yes	0.572723716	Mapkap1	Mapkap1_Intron	2	34602460	34602509	34602508	34602509	50	+	CTGTTGAGAGCTGCCAGGGAAGTCGACATTTTGATTGATGTTGGTACACG	Intron (Mapkap1-204/Mapkap1, intron 9 of 10)	2	34406862	34623475	216614	1	Mapkap1-204	195598	Mapkap1-204;Mapkap1-202;Mapkap1-201;Mapkap1-209;Mapkap1-203	Mapkap1;Mapkap1;Mapkap1;Mapkap1;Mapkap1	0;0;0;0;0	TRUE
3609	cg23441889	-0.00000248	0.00000437	-0.567163648	0.571013461	loss	ns	0.0000309	0.00000743	4.152474695	0.0000426	pos	ns	0.008590684	0.00217725	3.945658667	0.0000985	pos	ns	4.006632014	-0.000243194	0.0000749	-3.247977707	0.001289735	neg	ns	0.899958186	Gm12067	Gm12067_Intergenic_upstream	11	24764492	24764541	24764492	24764493	50	+	CGAGGAATCAATTAAAGTTGATTTGGCATATCTGCTTTTGACAAATATAA	Distal Intergenic	11	24552438	24553962	1525	2	Gm12067-201	-210530	NA	NA	NA	FALSE
18702	cg25548142	0.0000527	0.00000853	6.176899351	2.05E-09	gain	yes	-0.0000602	0.0000145	-4.151582504	0.0000427	neg	ns	0.012647309	0.004247132	2.977846626	0.003131792	pos	ns	2.504207074	-0.000673699	0.000146059	-4.612527835	0.00000583	neg	ns	0.621105213	Snx11	Snx11_Intron	11	96767293	96767342	96767341	96767342	50	-	CATTTGGAGCATTGGGCTCATTAATATTCATGAGCCATCCCCACCAATCG	Intron (Gm11537-201/Gm11537-201, intron 1 of 1)	11	96770098	96771050	953	2	Snx11-203	3757	Snx11-201;Snx11-202;Snx11-204;Snx11-203	Snx11;Snx11;Snx11;Snx11	10189;10217;10150;3708	TRUE
14247	cg14398903	0.00000378	0.0000106	0.358080443	0.720526814	gain	ns	0.0000744	0.0000179	4.151424392	0.0000427	pos	ns	0.016207106	0.005253122	3.085233142	0.002217262	pos	ns	2.65418289	-0.000327373	0.000180654	-1.812148097	0.070930734	neg	ns	0.80914945	Onecut1	Onecut1_Intergenic_downstream	9	74893672	74893721	74893720	74893721	50	-	TTTGTAAACTCCTAGGACGAGTGCCTTGCTTGAACCAAAGTGTTAAACCG	Downstream (1-2kb)	9	74866484	74890360	23877	1	Onecut1-202	27237	Onecut1-201;Onecut1-202	Onecut1;Onecut1	0;0	FALSE
17598	cg18736756	0.00000466	0.00000664	0.701716761	0.483382291	gain	ns	0.0000468	0.0000113	4.151166783	0.0000428	pos	ns	0.008936292	0.003303543	2.7050632	0.007206727	pos	ns	2.142261953	-0.000120811	0.000113609	-1.063395833	0.288430123	neg	ns	0.946440655	Aktip	Aktip_Exon	8	91171149	91171198	91171197	91171198	50	-	CAGAAAGATTTTATTAAACCAAATGAGCAAATCATCTGCGTATTATTGCG	Exon (Gm45666-201/Gm45666-201, exon 2 of 2)	8	91125916	91199976	74061	2	Aktip-209	28778	Aktip-209;Aktip-207	Aktip;Aktip	0;0	TRUE
1076	cg20509119	-0.00000431	0.0000146	-0.294542073	0.768540857	loss	ns	0.000103244	0.0000249	4.149556236	0.0000431	pos	ns	0.012326253	0.007289227	1.691023291	0.091837413	pos	ns	1.036980358	-0.0000921	0.000250676	-0.367594179	0.713426693	neg	ns	0.298723578	Gm14515	Gm14515_Intergenic_upstream	X	11494210	11494259	11494258	11494259	50	-	CCCAGATGGTCAGGGAAGCCCTTTCCCGCCTCACAAAGAGGATCGCTGCG	Distal Intergenic	20	11601354	11601569	216	1	Gm14515-201	-107144	NA	NA	NA	FALSE
9232	cg11069909	0.000029	0.00000339	8.556065788	5.48E-16	gain	yes	-0.0000239	0.00000576	-4.148802548	0.0000432	neg	ns	-0.007150985	0.001688704	-4.234598868	0.0000302	neg	ns	4.519813629	0.000194357	0.0000581	3.346684696	0.000918508	pos	ns	0.897807963	Cadm1	Cadm1_Intron	9	47803301	47803350	47803301	47803302	50	+	CGCTCTTGTTTGTGACATTTCCCTGTTGGGTGCTCGTTTGCAAGCTCATT	Intron (Cadm1-204/Cadm1, intron 5 of 9)	9	47530173	47853385	323213	1	Cadm1-204	273128	Cadm1-204;Cadm1-209;Cadm1-206;Cadm1-202;Cadm1-203;Cadm1-205;Cadm1-211;Cadm1-208;Cadm1-201	Cadm1;Cadm1;Cadm1;Cadm1;Cadm1;Cadm1;Cadm1;Cadm1;Cadm1	0;0;0;0;0;0;0;0;0	TRUE
12228	cg08716112	-0.00000118	0.00000467	-0.253552644	0.80000926	loss	ns	-0.0000329	0.00000794	-4.148136338	0.0000433	neg	ns	0.005066449	0.002325947	2.178230776	0.030142148	pos	ns	1.520825806	-0.000301455	0.00008	-3.768696601	0.000196421	neg	ns	0.887759122	Ptch1	Ptch1_Exon	13	63540780	63540829	63540780	63540781	50	-	CGGCACCCTGGGACTTGGAGCAGTCCCAGCGCAGCATGGTTAGACAGGCA	Exon (Ptch1-201/Ptch1, exon 10 of 23)	13	63508328	63565735	57408	2	Ptch1-201	24906	Ptch1-201;Ptch1-204;Ptch1-206;Ptch1-202;Ptch1-210;Ptch1-207;Ptch1-203;Ptch1-205;Ptch1-208	Ptch1;Ptch1;Ptch1;Ptch1;Ptch1;Ptch1;Ptch1;Ptch1;Ptch1	0;0;0;0;-1102;0;0;0;4487	TRUE
13648	cg10510607	-0.0000173	0.0000192	-0.900804703	0.368391439	loss	ns	0.00013497	0.0000326	4.145098417	0.0000439	pos	ns	0.002512254	0.009539364	0.263356603	0.792450697	pos	ns	0.101027748	0.000694484	0.000328058	2.116955602	0.035059921	pos	ns	0.745867985	Gpr50	Gpr50_Exon	X	71667226	71667275	71667274	71667275	50	-	CTCAATGAGAATTTCCGAAGAGAATACTGGACCATCTTCCATGCTATGCG	Exon (Gpr50-201/Gpr50, exon 2 of 2)	20	71663667	71669257	5591	1	Gpr50-201	3559	Gpr50-201;Gpr50-202;Gpr50-203	Gpr50;Gpr50;Gpr50	0;0;0	TRUE
26108	cg26601187	0.0000158	0.0000171	0.922857303	0.356799282	gain	ns	0.000120577	0.0000291	4.14404456	0.0000441	pos	ns	0.012466853	0.008524307	1.462506307	0.144615566	pos	ns	0.839784958	-0.0000439	0.00029315	-0.149854453	0.880976896	neg	ns	0.756587118	Dcx	Dcx_Exon	X	143931090	143931139	143931138	143931139	50	-	ACAGCGTACACAATCCCCTTGAAGTAGCGGTCCCCATTGCGGTAGAAACG	Exon (Dcx-201/Dcx, exon 2 of 7)	20	143855842	143933311	77470	2	Dcx-201	2172	Dcx-201;Dcx-203;Dcx-202;Dcx-204;Dcx-206;Dcx-205	Dcx;Dcx;Dcx;Dcx;Dcx;Dcx	0;0;0;0;0;0	TRUE
11949	cg20252108	0.0000604	0.00000598	10.10841658	5.99E-21	gain	yes	-0.0000421	0.0000102	-4.141270829	0.0000446	neg	ns	-0.004463721	0.002975443	-1.500186882	0.134583747	neg	ns	0.871007386	0.000248486	0.000102325	2.428392247	0.015734532	pos	ns	0.719976268	Psmd14	Psmd14_Intron	2	61794987	61795036	61794987	61794988	50	-	CGTTTCTAGTGTGAATAGCCACAAACATTTTCAGTGCTTTTTTGTTGGTT	Intron (Psmd14-201/Psmd14, intron 10 of 11)	2	61711694	61800376	88683	1	Psmd14-201	83293	Psmd14-201;Psmd14-208;Psmd14-202	Psmd14;Psmd14;Psmd14	0;0;0	TRUE
8843	cg10083965	0.0000419	0.0000141	2.982886462	0.003082114	gain	ns	-0.0000988	0.0000239	-4.137571656	0.0000453	neg	ns	0.049728159	0.006998365	7.10568269	8.26E-12	pos	yes	11.08293662	-0.000647904	0.000240673	-2.692049155	0.007487241	neg	ns	0.566614227	Vegfa	Vegfa_Exon	17	46021017	46021066	46021065	46021066	50	+	CTGCCTCGCCTTGCAACGCGAGTCTGTGTTTTTGCAGGAACATTTACACG	Exon (Vegfa-202/Vegfa, exon 6 of 7)	17	46016993	46031815	14823	2	Vegfa-201	10749	Vegfa-201;Vegfa-202;Vegfa-210;Vegfa-207;Vegfa-205;Vegfa-208;Vegfa-204;Vegfa-206;Vegfa-203;Vegfa-209	Vegfa;Vegfa;Vegfa;Vegfa;Vegfa;Vegfa;Vegfa;Vegfa;Vegfa;Vegfa	0;0;0;0;0;0;0;0;0;10290	TRUE
25415	cg19416390	-0.00000463	0.00000246	-1.88399506	0.060501315	loss	ns	0.0000173	0.00000417	4.136250991	0.0000455	pos	ns	0.001516778	0.001222022	1.241203838	0.215468852	pos	ns	0.666615503	0.00000287	0.000042	0.06818893	0.9456792	pos	ns	0.953321218	Hnrnpr	Hnrnpr_Exon	4	136332384	136332433	136332432	136332433	50	+	TGTTGGTTTAACAGAGGGTTTGGTGGACGTTATTCTCTATCATCAACCCG	Exon (Hnrnpr-204/Hnrnpr, exon 7 of 10)	4	136310942	136340681	29740	1	Hnrnpr-204	21442	Hnrnpr-204;Hnrnpr-202;Hnrnpr-207;Hnrnpr-201;Hnrnpr-206;Hnrnpr-205;Hnrnpr-208	Hnrnpr;Hnrnpr;Hnrnpr;Hnrnpr;Hnrnpr;Hnrnpr;Hnrnpr	0;0;0;0;0;20793;-3640	TRUE
8145	cg22414596	-0.0000384	0.0000103	-3.739934149	0.000219214	loss	ns	0.0000721	0.0000174	4.135154073	0.0000457	pos	ns	0.005019538	0.005107968	0.982687858	0.326527401	pos	ns	0.486080369	-0.000169485	0.000175663	-0.96483507	0.335379478	neg	ns	0.342491169	Pax2	Pax2_Intron	19	44797690	44797739	44797690	44797691	50	-	CGTGTGAGGTGACATTTGAATTTACAATTCCGCTGAGAAAAGCCATTAAT	Intron (Pax2-203/Pax2, intron 5 of 9)	19	44756045	44837851	81807	1	Pax2-203	41645	Pax2-203;Pax2-201;Pax2-202	Pax2;Pax2;Pax2	0;0;0	TRUE
6692	cg19977633	0.00000311	0.00000904	0.344206822	0.730924123	gain	ns	0.0000635	0.0000154	4.134822103	0.0000458	pos	ns	0.009702581	0.004497469	2.157342687	0.03174712	pos	ns	1.498295672	-0.000150109	0.000154668	-0.970525426	0.332541278	neg	ns	0.467276918	Arap3	Arap3_Intron	18	38059448	38059497	38059448	38059449	50	+	CGAGGAGGCCTTTTGCATTTGATGTAAATATTATGGTGATGAGAGGTGAC	Intron (Gm30093-201/Gm30093-201, intron 3 of 3)	18	37996312	37998969	2658	2	Arap3-203	-60479	NA	NA	NA	TRUE
20516	cg01856529	0.000319082	0.0000212	15.03306204	9.62E-39	gain	yes	-0.000149084	0.0000361	-4.134449291	0.0000459	neg	ns	-0.020110751	0.010564071	-1.903693319	0.057876018	neg	ns	1.237501355	0.000433235	0.000363298	1.192506999	0.233974498	pos	ns	0.576706111	Cbx5	Cbx5_fiveUTR	15	103215011	103215060	103215059	103215060	50	+	CCACCACTCACCTTGGAATTTCCGGGAGCTGAGCAGTTTAGGTCAGAGCG	5' UTR	15	103191544	103239816	48273	2	Cbx5-202	24756	Cbx5-202;Cbx5-201;Cbx5-203;Cbx5-204	Cbx5;Cbx5;Cbx5;Cbx5	0;0;0;0	TRUE
23510	cg12211405	0.0000122	0.0000173	0.704826104	0.481447657	gain	ns	0.000121621	0.0000294	4.132604083	0.0000462	pos	ns	0.002016078	0.008621866	0.233833146	0.81526886	pos	ns	0.088699146	0.000397221	0.000296505	1.339675931	0.181331972	pos	ns	0.741145993	Gm18441	Gm18441_Promoter	12	118739536	118739585	118739536	118739537	50	+	CGACAATTGCACCACCAGAAAAACACTGGCTGATGAAATCTGAGCAGTTA	Promoter (6-7kb)	12	118732439	118733055	617	2	Gm18441-201	-6481	NA	NA	NA	FALSE
3221	cg12307242	0.000434507	0.000017	25.55465448	2.73E-78	gain	yes	-0.000119357	0.0000289	-4.132023197	0.0000463	neg	ns	0.026848677	0.008462588	3.172631933	0.001662054	pos	ns	2.779354962	0.000236163	0.000291028	0.811478134	0.417713761	pos	ns	0.743135186	Cadps2	Cadps2_Intron	6	23272710	23272759	23272758	23272759	50	-	TCACACTTATTGTGCATGACTGTAGACTGGTAAATCATATTAGCAGCCCG	Intron (Cadps2-213/Cadps2, intron 28 of 29)	6	23262773	23839137	576365	2	Cadps2-213	566378	Cadps2-213;Cadps2-205;Cadps2-212;Cadps2-201;Cadps2-209;Cadps2-206;Cadps2-211;Cadps2-207;Cadps2-202;Cadps2-210	Cadps2;Cadps2;Cadps2;Cadps2;Cadps2;Cadps2;Cadps2;Cadps2;Cadps2;Cadps2	0;0;0;0;0;0;0;0;0;0	TRUE
25708	cg13449577	0.0000519	0.00000855	6.069448729	3.74E-09	gain	yes	-0.00006	0.0000145	-4.131832938	0.0000463	neg	ns	0.015586469	0.004255649	3.662536486	0.000293572	pos	ns	3.532285541	-0.000348369	0.000146351	-2.380357248	0.017900038	neg	ns	0.755259525	Nek7	Nek7_Intron	1	138500316	138500365	138500364	138500365	50	+	CTCCCAGCAGCTGAATTTTTCAGGCTAATTTGATCCTCCACACTGAGACG	Intron (Nek7-202/Nek7, intron 8 of 9)	1	138482875	138619749	136875	2	Nek7-202	119384	Nek7-202;Nek7-203;Nek7-201	Nek7;Nek7;Nek7	0;0;0	TRUE
25976	cg01608469	0.0000773	0.0000142	5.431247664	0.000000113	gain	yes	0.0000999	0.0000242	4.132010447	0.0000463	pos	ns	0.032956858	0.007080539	4.654569216	0.00000482	pos	ns	5.31704564	-0.000764177	0.000243499	-3.138316412	0.001862619	neg	ns	0.312072653	Tmem164	Tmem164_Exon	X	142682610	142682659	142682610	142682611	50	+	CGTGGACCCCAGTTTTGCAGGCAATGGGGGCCCCGACTGTGCTGCCTTCC	Exon (Tmem164-201/Tmem164, exon 2 of 7)	20	142681406	142843494	162089	1	Tmem164-204	1204	Tmem164-204;Tmem164-202;Tmem164-205;Tmem164-201;Tmem164-206;Tmem164-208;Tmem164-207	Tmem164;Tmem164;Tmem164;Tmem164;Tmem164;Tmem164;Tmem164	0;0;0;0;0;0;0	TRUE
21421	cg07714022	0.0000466	0.00000642	7.266938774	3.00E-12	gain	yes	-0.000045	0.0000109	-4.12787172	0.0000471	neg	ns	-0.004506546	0.003193505	-1.411159726	0.159200315	neg	ns	0.798056076	0.000023	0.000109824	0.209160743	0.834460134	pos	ns	0.752323679	Rbm5	Rbm5_Intergenic_downstream	9	107729940	107729989	107729988	107729989	50	-	CATAGTAACAGAAAGGTGCATCCCATCACCATGGCAACAGGCAAACACCG	Distal Intergenic	9	107743333	107744234	902	2	Rbm5-207	14294	NA	NA	NA	FALSE
22547	cg24695375	-0.0000473	0.0000123	-3.842267553	0.000147872	loss	ns	0.0000863	0.0000209	4.126219098	0.0000474	pos	ns	0.022662584	0.006128925	3.697643985	0.000257302	pos	ns	3.589557641	-0.001108586	0.000210773	-5.25961445	0.00000027	neg	yes	0.279445132	Olfm3	Olfm3_fiveUTR	3	115081012	115081061	115081012	115081013	50	+	CGGGATCTTAATCAGTCACTATGAAAACTCATTAGCTCCACAGCAATGAG	5' UTR	3	114904078	115125722	221645	1	Olfm3-202	176934	Olfm3-202;Olfm3-203;Olfm3-201	Olfm3;Olfm3;Olfm3	0;0;0	TRUE
7693	cg20498067	0.000156965	0.0000218	7.200747966	4.56E-12	gain	yes	-0.000152797	0.000037	-4.12601918	0.0000475	neg	ns	0.070603763	0.010849305	6.507675867	3.06E-10	pos	ns	9.513605086	-0.00255592	0.000373107	-6.850371545	3.97E-11	neg	yes	0.584390555	Fbxl5	Fbxl5_Exon	5	43745304	43745353	43745304	43745305	50	+	CGCCAGAGCGGCAGCAGGCTCGAAAACCACACTGCAAATTCTGGCATCCA	Exon (Fbxl5-204/Fbxl5, exon 11 of 11)	5	43744615	43782143	37529	2	Fbxl5-204	36790	Cc2d2a-201;Fbxl5-204;Fbxl5-209;Fbxl5-211;Fbxl5-201;Fbxl5-203	Cc2d2a;Fbxl5;Fbxl5;Fbxl5;Fbxl5;Fbxl5	0;0;0;0;0;0	TRUE
23951	cg04695476	0.00000705	0.00000479	1.470898837	0.14233278	gain	ns	-0.0000336	0.00000814	-4.1238636	0.0000479	neg	ns	-0.001934534	0.002384223	-0.811389725	0.417764437	neg	ns	0.379068532	-0.00011014	0.000082	-1.343277332	0.180164719	neg	ns	0.844213099	Hectd4	Hectd4_Exon	5	121304369	121304418	121304369	121304370	50	-	CGGATCAGACTGCCTCCAGGAATCATGATAAAGCTCAGGGAAATTTCTGG	Exon (Hectd4-201/Hectd4, exon 25 of 76)	5	121220219	121368577	148359	1	Hectd4-201	84150	Hectd4-201;Hectd4-207;Hectd4-203;Hectd4-205;Hectd4-202	Hectd4;Hectd4;Hectd4;Hectd4;Hectd4	0;0;0;0;-1312	TRUE
23640	cg22315785	0.00000299	0.0000173	0.172902196	0.862841139	gain	ns	0.000121242	0.0000294	4.123582597	0.000048	pos	ns	0.013394086	0.008613818	1.554953458	0.120977443	pos	ns	0.9172956	-0.0000749	0.000296228	-0.252865685	0.800539601	neg	ns	0.915015932	Ino80	Ino80_Exon	2	119423723	119423772	119423723	119423724	50	+	CGTAGCTGATGGAGCCTGTAGGAGGCTTTCAGAGACAGGAAAAGAGCTAA	Exon (Ino80-201/Ino80, exon 24 of 36)	2	119373042	119477687	104646	2	Ino80-201	53915	Ino80-201;Ino80-202	Ino80;Ino80	0;0	TRUE
23369	cg24028289	0.00000738	0.0000123	0.60020288	0.548809532	gain	ns	0.0000861	0.0000209	4.121699521	0.0000483	pos	ns	-0.000737468	0.006122775	-0.120446736	0.904207297	neg	ns	0.043731993	0.000250023	0.000210562	1.187408597	0.235975531	pos	ns	0.646514387	Sox21	Sox21_Intergenic_downstream	14	118194620	118194669	118194668	118194669	50	+	TAATCTCCCGCTGTATCTTCATTTTTCATTGAACTAGCCAGTTTTCTGCG	Distal Intergenic	14	118233232	118237030	3799	2	Sox21-201	42361	NA	NA	NA	FALSE
12814	cg17341782	0.000147932	0.0000123	12.01363866	1.48E-27	gain	yes	-0.0000861	0.0000209	-4.114533136	0.0000498	neg	ns	-0.003281508	0.00612866	-0.535436411	0.592732021	neg	ns	0.22714161	0.000286435	0.000210764	1.359031927	0.175124372	pos	ns	0.680461752	Tmem33	Tmem33_Intergenic_upstream	5	67228751	67228800	67228751	67228752	50	+	CGCCACTCGATTCCGGGATAATTTTTAATATATATGCAATAAATGTTCAC	Distal Intergenic	5	67260565	67291461	30897	1	Tmem33-201	-31765	NA	NA	NA	FALSE
22117	cg08981150	0.0000198	0.00000315	6.289664712	1.08E-09	gain	yes	-0.000022	0.00000535	-4.107148518	0.0000513	neg	ns	0.001388613	0.001567717	0.885754798	0.376436231	pos	ns	0.424308583	-0.0000697	0.0000539	-1.291976212	0.197327708	neg	ns	0.930017025	Eif4g2	Eif4g2_Exon	7	111078444	111078493	111078492	111078493	50	-	TGACCCTCTGCTGCTGGGCCATCAAAGTTTGGTGCATCTTCTGCCAATCG	Exon (Eif4g2-213/Eif4g2, exon 6 of 22)	7	111067750	111083030	15281	2	Eif4g2-213	4537	Eif4g2-213;Eif4g2-206;Eif4g2-208;Eif4g2-214;Eif4g2-202;Eif4g2-204;Eif4g2-211;Eif4g2-210;Eif4g2-209;Eif4g2-203;Eif4g2-201;Eif4g2-212;Eif4g2-205	Eif4g2;Eif4g2;Eif4g2;Eif4g2;Eif4g2;Eif4g2;Eif4g2;Eif4g2;Eif4g2;Eif4g2;Eif4g2;Eif4g2;Eif4g2	0;0;0;-4195;-3745;-3059;-2235;0;0;0;0;0;0	TRUE
19147	cg16797109	0.0000253	0.00000543	4.653113215	0.00000485	gain	ns	-0.0000379	0.00000923	-4.106642576	0.0000514	neg	ns	-0.007115371	0.002703134	-2.632267255	0.008906357	neg	ns	2.050299919	0.000122555	0.000093	1.318356847	0.188357447	pos	ns	0.871975631	Ddx23	Ddx23_Exon	15	98650970	98651019	98650970	98650971	50	+	CGTGACTGCTCTCGCTTCTGCTGCTTGAGGTCAATGCCTGCAATGAAGCC	Exon (Ddx23-201/Ddx23, exon 9 of 17)	15	98645134	98662889	17756	2	Ddx23-201	11870	Ddx23-201;Ddx23-204;Ddx23-203;Ddx23-205	Ddx23;Ddx23;Ddx23;Ddx23	0;0;0;11865	TRUE
23374	cg26490921	-0.0000296	0.0000117	-2.53416923	0.011763486	loss	ns	0.0000815	0.0000198	4.104240847	0.0000519	pos	ns	-0.009024135	0.005814584	-1.551982907	0.121686594	neg	ns	0.914757264	0.000416097	0.000199963	2.080867705	0.038266728	pos	ns	0.740924976	Sox21	Sox21_Intergenic_downstream	14	118194835	118194884	118194883	118194884	50	-	ATTTGCAATTTAATGACATTACAGCTCTCAGCTTAGGCTGGCGTGCTGCG	Distal Intergenic	14	118233232	118237030	3799	2	Sox21-201	42195	NA	NA	NA	FALSE
21438	cg24911138	0.0000237	0.0000177	1.340942587	0.180920794	gain	ns	-0.000123392	0.0000301	-4.103689966	0.000052	neg	ns	0.043752498	0.008809057	4.966763107	0.00000113	pos	ns	5.948156334	-0.00151251	0.000302943	-4.992724496	0.000000995	neg	yes	0.429523927	Rbm5	Rbm5_threeUTR	9	107759826	107759875	107759826	107759827	50	+	CGAAGGCGAAACCACGGCTTACACCTAGAGACAGCATTCAGATATAGACG	3' UTR	9	107740371	107770996	30626	2	Rbm5-214	11121	Rbm5-214;Rbm5-219;Rbm5-224;Rbm5-210;Rbm5-201;Rbm5-211;Rbm5-221;Rbm5-220;Rbm5-223;Rbm5-208;Rbm5-203;Rbm5-204;Rbm5-218	Rbm5;Rbm5;Rbm5;Rbm5;Rbm5;Rbm5;Rbm5;Rbm5;Rbm5;Rbm5;Rbm5;Rbm5;Rbm5	0;0;0;0;0;0;0;0;0;0;0;11084;11070	TRUE
301	cg13888366	0.0000407	0.00000586	6.951905836	2.14E-11	gain	yes	-0.0000408	0.00000995	-4.099690161	0.0000529	neg	ns	0.014296089	0.002915579	4.903344258	0.00000152	pos	ns	5.817342824	-0.000594513	0.000100267	-5.929323278	8.11E-09	neg	yes	0.616674488	U2af2	U2af2_Exon	7	5068807	5068856	5068855	5068856	50	-	TTCTGACTTTCTCAACCTGCACTTTGCTACATTTGATAAACCAGCCCCCG	Exon (U2af2-206/U2af2, exon 2 of 8)	7	5062143	5079938	17796	1	U2af2-201	6664	U2af2-201;U2af2-209;U2af2-203;U2af2-207;U2af2-208;U2af2-205;U2af2-204;U2af2-202;U2af2-206	U2af2;U2af2;U2af2;U2af2;U2af2;U2af2;U2af2;U2af2;U2af2	0;0;6532;6524;6515;6503;0;0;0	TRUE
994	cg22603530	0.0000107	0.0000142	0.753191783	0.451906296	gain	ns	0.0000985	0.000024	4.095688918	0.0000538	pos	ns	0.022332679	0.007044733	3.170124321	0.001676005	pos	ns	2.775724745	-0.000662804	0.000242268	-2.735831242	0.006580855	neg	ns	0.624877927	Syt7	Syt7_threeUTR	19	10426594	10426643	10426642	10426643	50	+	CGCTCCAACCCAGGCAGCTGGGACCACGTGGTGGGGCAGATTCGAAACCG	3' UTR	19	10389090	10448444	59355	1	Syt7-201	37504	Syt7-201;Syt7-208;Syt7-206;Syt7-203;Syt7-202;Syt7-210;Syt7-211;Syt7-204;Syt7-205;Syt7-207;Syt7-209;Syt7-213;Syt7-214;Syt7-215;Syt7-212	Syt7;Syt7;Syt7;Syt7;Syt7;Syt7;Syt7;Syt7;Syt7;Syt7;Syt7;Syt7;Syt7;Syt7;Syt7	0;0;0;0;0;0;0;0;0;0;0;0;0;0;0	TRUE
23058	cg25285086	0.000130186	0.00000759	17.14603186	8.18E-47	gain	yes	-0.0000528	0.0000129	-4.094054883	0.0000541	neg	ns	-0.003430088	0.003778996	-0.907671735	0.364756721	neg	ns	0.437996697	0.0000923	0.000129959	0.710472995	0.477945015	pos	ns	0.634585419	Taok3	Taok3_fiveUTR	5	117241100	117241149	117241148	117241149	50	-	ATGTATTCATAAGGGATGAGGCGGGCCACGGCGATCCCAGGCCTGAGCCG	5' UTR	5	117120129	117275217	155089	1	Taok3-203	120971	Taok3-203;Taok3-210;Taok3-201;Taok3-205;Taok3-208;Taok3-202	Taok3;Taok3;Taok3;Taok3;Taok3;Taok3	0;0;0;0;0;0	TRUE
5823	cg10823530	-0.00000213	0.00000537	-0.397279753	0.691434569	loss	ns	-0.0000373	0.00000912	-4.09106722	0.0000548	neg	ns	0.00177865	0.002670536	0.666027144	0.505889056	pos	ns	0.295944715	-0.000336777	0.0000918	-3.667019713	0.000288686	neg	ns	0.682445448	Prpf4b	Prpf4b_threeUTR	13	34901987	34902036	34901987	34901988	50	+	CGTTTTCCTAGGTGTGTGTGTGCAGGCCACAGCAGCATGCCCTTGGTGTA	3' UTR	13	34875302	34906064	30763	1	Prpf4b-201	26685	Prpf4b-201;Prpf4b-208;Prpf4b-202;Prpf4b-203;Prpf4b-210;Prpf4b-207;Prpf4b-204;Prpf4b-205;Prpf4b-209	Prpf4b;Prpf4b;Prpf4b;Prpf4b;Prpf4b;Prpf4b;Prpf4b;Prpf4b;Prpf4b	0;0;0;9863;0;0;0;0;0	TRUE
20088	cg02262384	0.0000675	0.00000932	7.239836656	3.56E-12	gain	yes	-0.0000648	0.0000158	-4.090269192	0.000055	neg	ns	-0.007280824	0.004640894	-1.568840736	0.117705183	neg	ns	0.929204412	0.000116216	0.0001596	0.72817026	0.467059031	pos	ns	0.725687565	Map3k12	Map3k12_Exon	15	102502357	102502406	102502357	102502358	50	+	CGGTGCAGACAGGTCCCTTCTGACTTAATCTTTTCAAAGTGCAGTTTTAC	Exon (Map3k12-201/Map3k12, exon 8 of 14)	15	102497646	102516836	19191	2	Map3k12-201	14430	Gm10337-201;Map3k12-201;Map3k12-208;Map3k12-207;Map3k12-206;Map3k12-203;Map3k12-205;Map3k12-202;Pcbp2-201;Pcbp2-212;Pcbp2-214;Pcbp2-216;Pcbp2-203;Pcbp2-217;Pcbp2-202;Pcbp2-206;Pcbp2-219;Pcbp2-230;Pcbp2-210;Pcbp2-204;Pcbp2-215;Pcbp2-225	Gm10337;Map3k12;Map3k12;Map3k12;Map3k12;Map3k12;Map3k12;Map3k12;Pcbp2;Pcbp2;Pcbp2;Pcbp2;Pcbp2;Pcbp2;Pcbp2;Pcbp2;Pcbp2;Pcbp2;Pcbp2;Pcbp2;Pcbp2;Pcbp2	0;0;0;0;14598;14569;14410;14406;0;0;0;0;0;0;0;0;0;0;0;0;0;0	TRUE
8056	cg07410014	0.0000203	0.0000109	1.868842633	0.062587608	gain	ns	0.0000754	0.0000184	4.089819341	0.0000551	pos	ns	0.00801603	0.005401462	1.484048299	0.138812136	pos	ns	0.857572562	0.000101744	0.000185756	0.547729218	0.584271992	pos	ns	0.54428424	Pax5	Pax5_Intron	4	44708577	44708626	44708625	44708626	50	-	GATTAAATGATTATTCAGGCAATTGAACTAATCAAAGAGCCCATCGACCG	Intron (Pax5-201/Pax5, intron 1 of 9)	4	44524757	44710487	185731	2	Pax5-201	1861	Pax5-201;Pax5-202;Pax5-203;Pax5-204;Pax5-205;Pax5-207;Pax5-206;Pax5-209;Pax5-210;Pax5-212;Pax5-213;Pax5-214;Pax5-215;Pax5-208	Pax5;Pax5;Pax5;Pax5;Pax5;Pax5;Pax5;Pax5;Pax5;Pax5;Pax5;Pax5;Pax5;Pax5	0;0;0;0;0;0;0;0;0;0;0;0;0;0	TRUE
11409	cg12271854	0.00000783	0.0000151	0.519112833	0.604052457	gain	ns	0.000104772	0.0000256	4.089110609	0.0000552	pos	ns	0.024141398	0.007506408	3.216105169	0.001436632	pos	ns	2.842654393	-0.000499794	0.000258145	-1.936098637	0.053764463	neg	ns	0.53447227	Zic3	Zic3_Exon	X	58034486	58034535	58034534	58034535	50	+	AGTTCAAACTAGCACCAGCCACAACCCTGGACTTCCTCCTAATTTTAACG	Exon (Zic3-201/Zic3, exon 3 of 3)	20	58030643	58036559	5917	1	Zic3-201	3843	Zic3-204;Zic3-201;Zic3-203;Zic3-202	Zic3;Zic3;Zic3;Zic3	0;0;0;0	TRUE
5196	cg01810880	0.0000205	0.00000776	2.648988087	0.008486911	gain	ns	0.0000539	0.0000132	4.088798648	0.0000553	pos	ns	-0.000988666	0.003861046	-0.25606168	0.798073043	neg	ns	0.097957358	0.000376133	0.000132781	2.832727202	0.004917569	pos	ns	0.736699427	Gm13852	Gm13852_Intergenic_downstream	6	32706716	32706765	32706716	32706717	50	-	CGGAAAGGGTTTCCCAAGACAATGGAGATGCAATTTGAATTCCCAAGCCC	Distal Intergenic	6	32610119	32610360	242	1	Gm13852-201	96646	NA	NA	NA	FALSE
27333	cg15569619	0.0000263	0.00000432	6.090687604	3.33E-09	gain	yes	-0.00003	0.00000734	-4.088592681	0.0000554	neg	ns	-0.005404254	0.002150222	-2.5133473	0.012466015	neg	ns	1.904272362	0.000184435	0.0000739	2.494183336	0.013145346	pos	ns	0.807593209	Ncoa5	Ncoa5_Exon	2	165023101	165023150	165023149	165023150	50	-	GAGCCCAACTCTCCCAAGGTAACTCACGGCTTCAGGGTACTTTACCTTCG	Exon (Ncoa5-201/Ncoa5, exon 2 of 8)	2	165000357	165034867	34511	2	Ncoa5-201	11717	Ncoa5-201;Ncoa5-202;Ncoa5-203;Ncoa5-206;Ncoa5-208;Ncoa5-205;Ncoa5-207	Ncoa5;Ncoa5;Ncoa5;Ncoa5;Ncoa5;Ncoa5;Ncoa5	0;0;0;0;0;0;0	TRUE
20854	cg04638311	0.00000288	0.0000116	0.248054533	0.804256444	gain	ns	0.0000807	0.0000197	4.088419592	0.0000554	pos	ns	0.006491821	0.005782335	1.122698861	0.262434174	pos	ns	0.580979613	0.0000571	0.000198854	0.286900695	0.774380023	pos	ns	0.253165009	Pax6	Pax6_Promoter	2	105665093	105665142	105665141	105665142	50	+	TGATGAGAGATCTTTCCGCTCATTGCCCATTCAAATACAATTGTAGATCG	Promoter (3-4kb)	2	105668900	105697364	28465	1	Pax6-206	-3758	Pax6-206;Pax6-207;Pax6-210;Pax6-214	Pax6;Pax6;Pax6;Pax6	0;0;0;0	TRUE
4599	cg19264807	0.0000648	0.00000784	8.269309136	4.01E-15	gain	yes	-0.0000544	0.0000133	-4.085210948	0.0000561	neg	ns	0.001944657	0.003902584	0.498299955	0.61862598	pos	ns	0.208571845	0.0000531	0.00013421	0.395750088	0.692561621	pos	ns	0.769711629	E2f3	E2f3_Exon	13	29916865	29916914	29916865	29916866	50	+	CGGTTAACAGTTTGAGGTCCAGGGTGCAGCTTTGGATCAGTTCATCTAAT	Exon (E2f3-203/E2f3, exon 4 of 7)	13	29906575	29984391	77817	2	E2f3-203	67477	E2f3-203;E2f3-204;E2f3-201;E2f3-202	E2f3;E2f3;E2f3;E2f3	0;0;0;0	TRUE
4787	cg02179615	0.0000745	0.00000703	10.60426667	1.28E-22	gain	yes	-0.0000488	0.0000119	-4.084435551	0.0000563	neg	ns	-0.010078245	0.003498978	-2.880339865	0.004249231	neg	ns	2.371689623	0.000175008	0.00012033	1.454409314	0.146844585	pos	ns	0.690689001	Kcnk3	Kcnk3_Intergenic_upstream	5	30572061	30572110	30572061	30572062	50	+	CGGGCCAGGTGGGCCTCTGACACACAGCAGGAATTTTCCACTGGCGCATC	Distal Intergenic	5	30588170	30625271	37102	1	Kcnk3-201	-16060	NA	NA	NA	FALSE
3355	cg17179896	-0.0000137	0.0000121	-1.13723485	0.256318373	loss	ns	-0.0000837	0.0000205	-4.082725491	0.0000567	neg	ns	0.019287239	0.006006748	3.210928577	0.001461905	pos	ns	2.835080894	-0.001388558	0.000206572	-6.721922832	8.62E-11	neg	yes	0.714149368	Srrm2	Srrm2_fiveUTR	17	23808098	23808147	23808098	23808099	50	-	CGACCTTTCGACTCATGTTGCTGGAGAAGGATGTGAACCCTGGGGGCAAG	Promoter (<=1kb)	17	23808098	23808708	611	1	Srrm2-208	0	Srrm2-206;Srrm2-210;Srrm2-201;Srrm2-212;Srrm2-211;Srrm2-208;Srrm2-203;Srrm2-207	Srrm2;Srrm2;Srrm2;Srrm2;Srrm2;Srrm2;Srrm2;Srrm2	0;0;0;0;0;0;0;-3753	TRUE
7295	cg27456819	-0.00000185	0.00000411	-0.449521893	0.65336935	loss	ns	0.0000285	0.00000698	4.08255054	0.0000567	pos	ns	0.002269735	0.002044515	1.110158426	0.267791145	pos	ns	0.572203787	-0.0000245	0.0000703	-0.347861876	0.72818	neg	ns	0.955673602	Lsamp	Lsamp_threeUTR	16	42174154	42174203	42174154	42174155	50	+	CGGTGAGAGGAATAAATGGATCCATCAGTCTGGCCGTACCACTGTGGCTG	3' UTR	16	39984371	42176295	2191925	1	Lsamp-206	2189783	Lsamp-206;Lsamp-202;Lsamp-204;Lsamp-203	Lsamp;Lsamp;Lsamp;Lsamp	0;0;0;0	TRUE
23507	cg15587557	0.0000106	0.00000388	2.728853474	0.006718324	gain	ns	-0.0000269	0.00000659	-4.082416508	0.0000568	neg	ns	0.002241998	0.001930441	1.161391935	0.246376013	pos	ns	0.608401577	-0.000196133	0.0000664	-2.954364289	0.003373072	neg	ns	0.81361809	Med13l	Med13l_Exon	5	118728670	118728719	118728670	118728671	50	+	CGTAGGCCAAAGACTGCCTCTCATGGCAGAGGTCAGCGAGACAGCCTTAT	Exon (Med13l-201/Med13l, exon 10 of 31)	5	118560719	118765438	204720	1	Med13l-201	167951	Med13l-201;Med13l-202	Med13l;Med13l	0;0	TRUE
13860	cg23374309	-0.0000115	0.00000985	-1.163281874	0.245609784	loss	ns	0.0000683	0.0000167	4.078574822	0.0000577	pos	ns	0.007936369	0.004903542	1.618497059	0.106572453	pos	ns	0.972355038	0.000218711	0.000168632	1.29697119	0.195605571	pos	ns	0.737935876	Rpl31-ps2	Rpl31-ps2_Intergenic_upstream	13	73117211	73117260	73117259	73117260	50	+	TTCTGTAAGATTGTAATTACAAGCTTCGTTGGTTTGCTACTTATCACACG	Distal Intergenic	13	73233395	73233737	343	1	Rpl31-ps2-201	-116135	NA	NA	NA	FALSE
5325	cg09080324	0.00000115	0.00000496	0.231884668	0.816780588	gain	ns	0.0000344	0.00000843	4.077224626	0.000058	pos	ns	0.012879786	0.002469653	5.215220096	0.000000336	pos	ns	6.473268709	-0.00017826	0.0000849	-2.098870107	0.036636986	neg	ns	0.103827092	Nkx1-1	Nkx1-1_Promoter	5	33443622	33443671	33443670	33443671	50	-	TCAGGATGGCAGATGACGGCTAAAATTACCCGGAATCAATATTCTCACCG	Promoter (9-10kb)	5	33430734	33433976	3243	2	Nkx1-1-201	-9695	NA	NA	NA	FALSE
2615	cg11580199	0.000363389	0.0000182	19.93477413	1.75E-57	gain	yes	-0.000126248	0.000031	-4.076666675	0.0000581	neg	ns	-0.023260076	0.009072709	-2.563741114	0.010826383	neg	ns	1.965516623	0.000641124	0.00031201	2.054822161	0.040733992	pos	ns	0.467384262	Etl4	Etl4_Intron	2	20722310	20722359	20722358	20722359	50	+	CATTGAGAGGTTATGACAACATGAGCCATATTGTATTTATAAACATCACG	Intron (Etl4-207/Etl4, intron 7 of 7)	2	19909780	20744816	835037	1	Etl4-207	812530	Etl4-207;Etl4-209;Etl4-201;Etl4-208;Etl4-203;Etl4-202;Etl4-211;Etl4-217;Etl4-212;Etl4-205	Etl4;Etl4;Etl4;Etl4;Etl4;Etl4;Etl4;Etl4;Etl4;Etl4	0;0;0;0;0;0;0;-19;-19;-266	TRUE
27008	cg05809127	-0.0000421	0.00000777	-5.419227318	0.00000012	loss	yes	-0.0000538	0.0000132	-4.076350037	0.0000582	neg	ns	0.004011062	0.003864807	1.037842739	0.300152109	pos	ns	0.522658601	-0.000640247	0.00013291	-4.817135393	0.00000228	neg	ns	0.848257012	Rbm39	Rbm39_threeUTR	2	156167673	156167722	156167721	156167722	50	+	ATGTTTAAAAACCTTAATTTGATGCTATGAGGCAACCCAATCTTTCCTCG	3' UTR	2	156147239	156180238	33000	2	Rbm39-203	12516	Rbm39-203;Rbm39-217;Rbm39-215;Rbm39-201;Rbm39-225;Rbm39-223;Rbm39-220;Rbm39-204;Rbm39-209;Rbm39-207;Rbm39-206;Rbm39-216;Rbm39-221;Rbm39-213;Rbm39-214	Rbm39;Rbm39;Rbm39;Rbm39;Rbm39;Rbm39;Rbm39;Rbm39;Rbm39;Rbm39;Rbm39;Rbm39;Rbm39;Rbm39;Rbm39	0;0;0;0;0;0;-2750;0;-2461;0;0;0;0;0;0	TRUE
5024	cg06392275	0.00001	0.00000526	1.9059975	0.057575237	gain	ns	-0.0000364	0.00000893	-4.074790751	0.0000586	neg	ns	-0.006285655	0.002616664	-2.402163854	0.016886393	neg	ns	1.772463119	-0.000140743	0.00009	-1.564042292	0.118827858	neg	ns	0.832202724	Dlg1	Dlg1_threeUTR	16	31846825	31846874	31846873	31846874	50	+	CTTCTTCAGCAGTCATTCAATGACAAGCGTAAAAAGAACCTCTTTTCCCG	3' UTR	16	31663443	31875129	211687	1	Dlg1-206	183382	Dlg1-206;Dlg1-205;Dlg1-203;Dlg1-209;Dlg1-202;Dlg1-201;Dlg1-204;Dlg1-208;Dlg1-207;Dlg1-213;Dlg1-214	Dlg1;Dlg1;Dlg1;Dlg1;Dlg1;Dlg1;Dlg1;Dlg1;Dlg1;Dlg1;Dlg1	0;0;0;0;0;0;0;55054;0;0;0	TRUE
24612	cg06759265	0.00000077	0.0000134	0.057263997	0.954371791	gain	ns	0.000093	0.0000228	4.074621981	0.0000586	pos	ns	0.018781318	0.006688428	2.808031724	0.005300625	pos	ns	2.275672936	-0.000339597	0.000230014	-1.476414233	0.140847787	neg	ns	0.671521283	Dlgap3	Dlgap3_Exon	4	127214398	127214447	127214398	127214399	50	-	CGGCTGTTTCCGCATGCGGAGCCACAGCTACCTCCGGGCCATCCAGGCCG	Exon (Dlgap3-201/Dlgap3, exon 6 of 12)	4	127169204	127237022	67819	1	Dlgap3-201	45194	Dlgap3-201;Dlgap3-203;Dlgap3-202;Dlgap3-204	Dlgap3;Dlgap3;Dlgap3;Dlgap3	0;0;0;0	TRUE
27571	cg14830513	0.0000437	0.0000207	2.110825909	0.035587783	gain	ns	0.000143308	0.0000352	4.070623981	0.0000596	pos	ns	0.031245745	0.010314021	3.029443647	0.002656191	pos	ns	2.575740638	-0.000410091	0.000354698	-1.156168647	0.248502418	neg	ns	0.348854906	Tshz2	Tshz2_Intron	2	169962278	169962327	169962278	169962279	50	+	CGCTGACATGACCTTTCTTGATTGAGTTTCACTGAGGAAATTTTTTGATG	Intron (Tshz2-203/Tshz2, intron 1 of 1)	2	169884893	170071816	186924	1	Tshz2-203	77385	Tshz2-203;Tshz2-205	Tshz2;Tshz2	0;0	TRUE
2001	cg03543715	0.0000292	0.0000142	2.054185222	0.040795988	gain	ns	0.0000981	0.0000241	4.070318157	0.0000596	pos	ns	0.015592339	0.00706377	2.207367753	0.028020661	pos	ns	1.552521622	-0.00022653	0.000242922	-0.932521683	0.351792693	neg	ns	0.402322788	Gm5721	Gm5721_Intergenic_downstream	6	16992236	16992285	16992284	16992285	50	+	TTCTGAAAAGCAATGTCACACTCTGATGACCTCTTCTCCTCATTAAAACG	Distal Intergenic	6	16925231	16926926	1696	1	Gm5721-201	67005	NA	NA	NA	FALSE
10222	cg04189329	0.000107563	0.0000078	13.7855835	4.77E-34	gain	yes	-0.0000539	0.0000133	-4.068941567	0.00006	neg	ns	0.004533339	0.003883417	1.167358365	0.243962791	pos	ns	0.612676406	0.00020524	0.00013355	1.536800216	0.125362248	pos	ns	0.285806261	Hoxa11	Hoxa11_Exon	6	52245816	52245865	52245816	52245817	50	-	CGTAAGCTGACGTGGAAATCTATCCCCATCCTTAGCAGGGAGGTGCTGGT	Promoter (<=1kb)	6	52242106	52245810	3705	2	Hoxa11-201	-55	Hoxa10-201;Hoxa11-201;Hoxa11-202	Hoxa10;Hoxa11;Hoxa11	0;0;0	TRUE
27395	cg11332417	-0.0000212	0.00000722	-2.940563119	0.003522697	loss	ns	-0.0000499	0.0000123	-4.068040977	0.0000602	neg	ns	0.005650867	0.003593024	1.572732848	0.116800717	pos	ns	0.93255449	-0.000361283	0.000123564	-2.923855106	0.003711946	neg	ns	0.946047468	Ildr2	Ildr2_Exon	1	166291430	166291479	166291478	166291479	50	+	CTTGCTGATCTCTTGCCCAGTTTTGCTGTGGAGATTATGCCAGGTATTCG	Exon (Ildr2-201/Ildr2, exon 4 of 10)	1	166254139	166316823	62685	1	Ildr2-201	37291	Ildr2-201;Ildr2-202;Ildr2-203;Ildr2-204;Ildr2-205;Ildr2-206;Ildr2-207	Ildr2;Ildr2;Ildr2;Ildr2;Ildr2;Ildr2;Ildr2	0;0;0;0;0;0;0	TRUE
5387	cg22256767	-0.00000925	0.00000729	-1.269536041	0.205202162	loss	ns	-0.0000503	0.0000124	-4.066700288	0.0000605	neg	ns	0.005422204	0.003626822	1.495029058	0.135924104	pos	ns	0.866703521	-0.000120561	0.000124726	-0.966605626	0.334494696	neg	ns	0.852820333	Fgfr3	Fgfr3_Exon	5	33732193	33732242	33732241	33732242	50	+	AGTACACCTGCCTGGCGGGCAATTCTATTGGGTTTTCTCATCACTCTGCG	Exon (Fgfr3-201/Fgfr3, exon 8 of 18)	5	33721724	33737067	15344	1	Fgfr3-201	10469	Fgfr3-214;Fgfr3-201;Fgfr3-203;Fgfr3-210;Fgfr3-209;Fgfr3-202;Fgfr3-211;Fgfr3-215;Fgfr3-216;Fgfr3-205;Fgfr3-208;Fgfr3-212;Fgfr3-204;Fgfr3-213;Fgfr3-217;Fgfr3-207;Fgfr3-206	Fgfr3;Fgfr3;Fgfr3;Fgfr3;Fgfr3;Fgfr3;Fgfr3;Fgfr3;Fgfr3;Fgfr3;Fgfr3;Fgfr3;Fgfr3;Fgfr3;Fgfr3;Fgfr3;Fgfr3	10519;0;0;0;0;0;0;0;9749;0;8421;0;0;0;-1010;-1450;-2363	TRUE
27141	cg00953793	-0.00000335	0.0000146	-0.229453739	0.818667588	loss	ns	0.000100729	0.0000248	4.065043241	0.0000609	pos	ns	0.022113763	0.007259468	3.046196086	0.002516659	pos	ns	2.599175639	-0.000674321	0.000249653	-2.701036796	0.007292485	neg	ns	0.187357637	Rps6ka3	Rps6ka3_Intron	X	159257235	159257284	159257283	159257284	50	+	TAATAGTTACTGAGTGAGTGACCCCATTTCTGGAAAGCATGACTGAAACG	Intron (Rps6ka3-204/Rps6ka3, intron 2 of 24)	20	159210307	159364502	154196	1	Rps6ka3-204	46928	Rps6ka3-204;Rps6ka3-205;Rps6ka3-201;Rps6ka3-203;Rps6ka3-207	Rps6ka3;Rps6ka3;Rps6ka3;Rps6ka3;Rps6ka3	0;0;0;0;0	TRUE
305	cg16886381	0.000102436	0.0000144	7.107425608	8.17E-12	gain	yes	-0.0000995	0.0000245	-4.06427827	0.0000611	neg	ns	0.039787909	0.007173278	5.546684714	6.24E-08	pos	ns	7.204543928	-0.001475226	0.000246688	-5.980120353	6.14E-09	neg	yes	0.280299487	Ewsr1	Ewsr1_Exon	11	5079547	5079596	5079595	5079596	50	-	AGGCCTTTCCCTTTAAAAGCCAGTACCGCTCTGAGCCTTGGGGGGGCTCG	Exon (Ewsr1-208/Ewsr1, exon 1 of 5)	11	5069689	5099266	29578	2	Ewsr1-203	19670	Ewsr1-203;Ewsr1-202;Ewsr1-205;Ewsr1-209;Ewsr1-212;Ewsr1-208;Ewsr1-211;Ewsr1-204;Ewsr1-210	Ewsr1;Ewsr1;Ewsr1;Ewsr1;Ewsr1;Ewsr1;Ewsr1;Ewsr1;Ewsr1	0;0;0;0;-1026;0;0;0;6440	TRUE
6107	cg01011077	0.000019	0.000021	0.904136003	0.366625363	gain	ns	0.000145016	0.0000357	4.064330743	0.0000611	pos	ns	-0.002480922	0.010453105	-0.237338256	0.812551159	neg	ns	0.090149286	0.000668281	0.000359481	1.859014548	0.063972512	pos	ns	0.215353966	Rpl17-ps9	Rpl17-ps9_Intergenic_upstream	7	36071766	36071815	36071814	36071815	50	-	TTTCCGCAGGTGCAGCTGAGGCAATCAGTCAATTCAATCAAAAGCCTCCG	Distal Intergenic	7	36118274	36118828	555	1	Rpl17-ps9-201	-46508	NA	NA	NA	FALSE
17167	cg27462914	-0.0000264	0.0000144	-1.838652376	0.066922794	loss	ns	-0.0000991	0.0000244	-4.063804891	0.0000612	neg	ns	-0.009108037	0.007147395	-1.274315514	0.203506054	neg	ns	0.691422667	-0.000205543	0.000245798	-0.836224992	0.403672441	neg	ns	0.867870471	Ano4	Ano4_threeUTR	10	88982231	88982280	88982279	88982280	50	-	AAAAGAAACATTTTCAGGGTGAAGCTGTTCTCCCACTCAGACTCTGTGCG	3' UTR	10	88948994	89257790	308797	2	Ano4-206	275510	Ano4-206;Ano4-204;Ano4-208;Ano4-210;Ano4-207	Ano4;Ano4;Ano4;Ano4;Ano4	0;0;0;0;0	TRUE
24621	cg14363797	0.00018824	0.000011	17.18391516	5.85E-47	gain	yes	-0.0000756	0.0000186	-4.062262015	0.0000616	neg	ns	-0.008203707	0.005452131	-1.504678946	0.133424784	neg	ns	0.87476349	0.000450409	0.000187498	2.402201545	0.016884685	pos	ns	0.45293682	Kif5a	Kif5a_Exon	10	127262785	127262834	127262785	127262786	50	+	CGTCCCCTTGGAAAATGGGGATGAACTTGTCTCCCCGCAGAATCTCAGCC	Promoter (<=1kb)	10	127225696	127263348	37653	2	Kif5a-201	514	Dctn2-202;Dctn2-201;Kif5a-201;Kif5a-202;Kif5a-203	Dctn2;Dctn2;Kif5a;Kif5a;Kif5a	-3534;0;0;0;0	TRUE
22395	cg05754145	0.0000233	0.00000291	8.002290374	2.47E-14	gain	yes	-0.0000201	0.00000494	-4.062390063	0.0000616	neg	ns	-0.001451115	0.001446832	-1.002960178	0.3166623	neg	ns	0.499403638	0.0000633	0.0000498	1.271196161	0.204611863	pos	ns	0.939972953	Actc1	Actc1_Exon	2	114047542	114047591	114047590	114047591	50	-	GTGGACAGAGAGGCCAGGATGGAGCCCCCAATCCAGACAGAGTATTTACG	Exon (Actc1-201/Actc1, exon 7 of 7)	2	114047282	114052887	5606	2	Actc1-201	5296	Actc1-201;Actc1-202	Actc1;Actc1	0;5957	TRUE
10294	cg11266179	0.000120509	0.00000681	17.69665805	6.32E-49	gain	yes	-0.000047	0.0000116	-4.060848458	0.000062	neg	ns	-0.005174182	0.003389255	-1.526642663	0.1278695	neg	ns	0.893233034	0.000351425	0.000116556	3.015068156	0.002781553	pos	ns	0.878877064	Hibadh	Hibadh_Intron	6	52567458	52567507	52567506	52567507	50	+	GACCATTTACGACTTGCTATGGTGTCTCTATTGTTTACCAGCGACATTCG	Intron (Hibadh-201/Hibadh, intron 4 of 7)	6	52546228	52640389	94162	2	Hibadh-201	72882	Hibadh-201;Hibadh-203	Hibadh;Hibadh	0;0	TRUE
15840	cg25595588	0.00000835	0.0000108	0.775360217	0.438717894	gain	ns	0.0000743	0.0000183	4.059106136	0.0000624	pos	ns	0.015293884	0.005360191	2.853234713	0.004618787	pos	ns	2.335472043	-0.000466052	0.000184337	-2.528265456	0.011959004	neg	ns	0.679520007	Scube1	Scube1_Intron	15	83651753	83651802	83651801	83651802	50	+	CAAGTAAGGGACAAACACGGAGCCAGTGGTTAATGACAGCCCACTTCCCG	Intron (Scube1-204/Scube1, intron 6 of 20)	15	83604999	83725021	120023	2	Scube1-204	73219	Scube1-204;Scube1-202;Scube1-201;Scube1-203;Scube1-205;Scube1-206	Scube1;Scube1;Scube1;Scube1;Scube1;Scube1	0;0;0;0;0;0	TRUE
16150	cg23314394	0.0000267	0.00000506	5.283265199	0.00000024	gain	yes	-0.0000349	0.00000859	-4.05807477	0.0000627	neg	ns	-0.005481976	0.002517072	-2.177917491	0.030165692	neg	ns	1.520486708	0.000245992	0.0000866	2.841804221	0.00478322	pos	ns	0.870845589	Lin52	Lin52_Intron	12	84532573	84532622	84532573	84532574	50	-	CGGCTGGAGTTTGCCGCTAAGACTCTTGCTGTTTGGGTCCCAGCAACACA	Intron (Lin52-202/Lin52, intron 4 of 4)	12	84456248	84546145	89898	1	Lin52-202	76325	Lin52-201;Lin52-202;Lin52-203;Lin52-204	Lin52;Lin52;Lin52;Lin52	0;0;0;0	TRUE
26595	cg09319435	-0.00000222	0.0000051	-0.434728609	0.664061892	loss	ns	-0.0000352	0.00000867	-4.058166011	0.0000627	neg	ns	0.001873459	0.002540636	0.737397657	0.461438319	pos	ns	0.335886343	-0.000311532	0.0000874	-3.565575934	0.000420339	neg	ns	0.921327881	Pex14	Pex14_Intron	4	148964792	148964841	148964792	148964793	50	+	CGCATATGGTGCCAGATGCCAGGATTTAGAAATAAAATCTGACATCTGGG	Intron (Gm17029-201/Gm17029-201, intron 1 of 2)	4	148960535	149099876	139342	2	Pex14-201	135035	Pex14-201;Pex14-202	Pex14;Pex14	0;0	TRUE
20213	cg01163536	-0.00000109	0.00000397	-0.27390115	0.784343	loss	ns	0.0000274	0.00000675	4.053249203	0.0000639	pos	ns	0.003084511	0.001977152	1.560077698	0.119761789	pos	ns	0.921681726	-0.0000538	0.000068	-0.791686406	0.429148897	neg	ns	0.075477137	Hoxc11	Hoxc11_Exon	15	102949857	102949906	102949857	102949858	50	+	CGAGGCTCTCCAAGTTTGGGGCCAGGCGATAAATCTCTGGCGAATCTTCC	Promoter (4-5kb)	15	102954427	102957708	3282	1	Hoxc11-201	-4521	Hoxc11-201	Hoxc11	0	TRUE
12937	cg14466155	-0.0000254	0.0000114	-2.23436706	0.026171514	loss	ns	0.0000782	0.0000193	4.052209125	0.0000642	pos	ns	0.010730204	0.005650937	1.898836147	0.058514359	pos	ns	1.232737547	-0.0000359	0.000194335	-0.184868546	0.853453028	neg	ns	0.396457009	Gm44887	Gm44887_Intron	7	68482735	68482784	68482735	68482736	50	-	CGACTGGATAGATCATTAAGAGAATTGGTTTACAAGGCTCTTGCTGAGCT	Intron (Gm34549-203/Gm34549-203, intron 4 of 6)	7	68598677	68598854	178	2	Gm44887-201	116119	NA	NA	NA	TRUE
25149	cg10400390	-0.0000238	0.0000198	-1.19961027	0.231206779	loss	ns	-0.000136309	0.0000336	-4.051656225	0.0000643	neg	ns	0.01485222	0.009856202	1.506890769	0.132856988	pos	ns	0.876615597	0.0000321	0.000338954	0.09483203	0.924509513	pos	ns	0.706532975	Ahdc1	Ahdc1_Intergenic_downstream	4	133086130	133086179	133086178	133086179	50	-	GCGGTTGCCTAGCAACCCCACAGCTGTCTGTTGACCTAGAAGAAGCTGCG	Distal Intergenic	4	133066249	133072063	5815	1	Ahdc1-208	19930	NA	NA	NA	FALSE
7622	cg10570966	0.000204863	0.0000125	16.41384223	5.23E-44	gain	yes	-0.0000859	0.0000212	-4.051251198	0.0000644	neg	ns	-0.007961984	0.006211984	-1.281713607	0.200900926	neg	ns	0.697018061	0.000339545	0.00021363	1.589409169	0.112987347	pos	ns	0.442507967	Zbtb20	Zbtb20_Intron	16	43503054	43503103	43503102	43503103	50	+	CCGAGCCTGCTGACAGATCATTCAAATTCAATTGTTTTATGTCTAAGCCG	Intron (Zbtb20-211/Zbtb20, intron 4 of 4)	16	42907542	43569781	662240	1	Zbtb20-211	595512	Zbtb20-211;Zbtb20-217;Zbtb20-204;Zbtb20-215;Zbtb20-201;Zbtb20-203;Zbtb20-214;Zbtb20-213;Zbtb20-219;Zbtb20-216;Zbtb20-208;Zbtb20-207;Zbtb20-220;Zbtb20-206	Zbtb20;Zbtb20;Zbtb20;Zbtb20;Zbtb20;Zbtb20;Zbtb20;Zbtb20;Zbtb20;Zbtb20;Zbtb20;Zbtb20;Zbtb20;Zbtb20	0;0;0;0;0;0;0;0;0;0;0;0;0;0	TRUE
4457	cg22103215	-0.000037	0.0000128	-2.889020832	0.004136699	loss	ns	0.0000881	0.0000217	4.05069128	0.0000646	pos	ns	0.005313653	0.006369045	0.834293499	0.404758043	pos	ns	0.392804512	0.000640424	0.000219031	2.923895503	0.003711477	pos	ns	0.520533525	Sox4	Sox4_threeUTR	13	28949481	28949530	28949481	28949482	50	+	CGAACTCAAATCGGCATTTAGATAGATCCAGTGGTTTAAACGGCACGTTT	3' UTR	13	28948919	28953713	4795	2	Sox4-201	4183	Sox4-201	Sox4	0	TRUE
18294	cg19107537	0.0000217	0.0000138	1.56544198	0.11849951	gain	ns	0.0000952	0.0000235	4.050139656	0.0000647	pos	ns	0.01925762	0.006888011	2.795817482	0.00549992	pos	ns	2.259643624	-0.000303787	0.000236878	-1.282463025	0.2006384	neg	ns	0.73430864	Gm48316	Gm48316_Intron	13	94702289	94702338	94702337	94702338	50	+	CCAAATTCACCCGTTTAAGCCATAATTGCAGAAACTATCAAATAATTACG	Intron (Gm32351-201/Gm32351-201, intron 1 of 2)	13	94752270	94752593	324	1	Gm48316-201	-49932	NA	NA	NA	TRUE
123	cg27356290	0.0000365	0.00000856	4.261848311	0.0000269	gain	ns	-0.0000589	0.0000145	-4.049650206	0.0000649	neg	ns	0.010183504	0.00425891	2.391105624	0.017393909	pos	ns	1.759602799	-0.000316943	0.000146464	-2.163971419	0.031229994	neg	ns	0.885230113	Kdm2a	Kdm2a_threeUTR	19	4317824	4317873	4317872	4317873	50	+	AGTGCAAAAAGCTCTCTGCTGCCCTAGAGAGAGGATCTTTGGACAGGCCG	3' UTR	19	4314419	4398285	83867	2	Kdm2a-201	80412	Kdm2a-201;Kdm2a-202;Kdm2a-213;Kdm2a-211;Kdm2a-207	Kdm2a;Kdm2a;Kdm2a;Kdm2a;Kdm2a	0;0;0;0;0	TRUE
1035	cg25922496	-0.0000115	0.00000607	-1.89142557	0.059499589	loss	ns	0.0000417	0.0000103	4.046775472	0.0000656	pos	ns	-0.001922995	0.003021036	-0.636534889	0.524897569	neg	ns	0.279925439	0.000122803	0.000103893	1.182015771	0.238105326	pos	ns	0.861784043	Gm14485	Gm14485_Intergenic_upstream	X	11088975	11089024	11089023	11089024	50	+	ACATGCTATCTTCCTCCTTGCTCACACCTCTGTAGGCAAGACTGGCTGCG	Distal Intergenic	20	11020515	11021007	493	2	Gm14485-201	-67968	NA	NA	NA	FALSE
26924	cg26883243	0.0000382	0.0000236	1.617305099	0.106829496	gain	ns	0.000162507	0.0000402	4.047061874	0.0000656	pos	ns	0.025455711	0.011763862	2.163890596	0.031236255	pos	ns	1.50534104	0.000248146	0.000404558	0.613374206	0.540078711	pos	ns	0.445727041	Cacna1e	Cacna1e_fiveUTR	1	154725652	154725701	154725700	154725701	50	-	GCCAATCGATGAGCTTCTTGGCATATTTCCTGACAATGTTATCTTCTCCG	Promoter (<=1kb)	1	154390731	154726356	335626	2	Cacna1e-203	655	Cacna1e-203;Cacna1e-201;Cacna1e-207;Cacna1e-206;Cacna1e-209;Cacna1e-204	Cacna1e;Cacna1e;Cacna1e;Cacna1e;Cacna1e;Cacna1e	0;0;0;0;0;0	TRUE
11466	cg08195802	-0.00000113	0.00000438	-0.259035606	0.795779689	loss	ns	-0.0000301	0.00000744	-4.04556866	0.000066	neg	ns	-0.002317208	0.002178708	-1.063569994	0.288351308	neg	ns	0.540078074	-0.0001125	0.0000749	-1.50148614	0.134247734	neg	ns	0.897380653	Hnrnpk	Hnrnpk_fiveUTR	13	58397900	58397949	58397948	58397949	50	+	ATAGCCAACCAGGGTTTTCACATGGGCGTTCAGGGGCGGATGGGCCAACG	5' UTR	13	58391142	58403343	12202	2	Hnrnpk-202	5394	Hnrnpk-202;Hnrnpk-224;Hnrnpk-221;Hnrnpk-232;Hnrnpk-216;Hnrnpk-201;Hnrnpk-205;Hnrnpk-217;Hnrnpk-206;Hnrnpk-209;Hnrnpk-213;Hnrnpk-227;Hnrnpk-234;Hnrnpk-233;Hnrnpk-228;Hnrnpk-214;Hnrnpk-215;Hnrnpk-211;Hnrnpk-208;Hnrnpk-212;Hnrnpk-231;Hnrnpk-230;Hnrnpk-203;Hnrnpk-218;Hnrnpk-226;Hnrnpk-207;Hnrnpk-219;Hnrnpk-225;Hnrnpk-229;Hnrnpk-223;Hnrnpk-220;Hnrnpk-210;Hnrnpk-204;Hnrnpk-222;Rmi1-205;Rmi1-201;Rmi1-20…	Hnrnpk;Hnrnpk;Hnrnpk;Hnrnpk;Hnrnpk;Hnrnpk;Hnrnpk;Hnrnpk;Hnrnpk;Hnrnpk;Hnrnpk;Hnrnpk;Hnrnpk;Hnrnpk;Hnrnpk;Hnrnpk;Hnrnpk;Hnrnpk;Hnrnpk;Hnrnpk;Hnrnpk;Hnrnpk;Hnrnpk;Hnrnpk;Hnrnpk;Hnrnpk;Hnrnpk;Hnrnpk;Hnrnpk;Hnrnpk;Hnrnpk;Hnrnpk;Hnrnpk;Hnrnpk;Rmi1;Rmi1;Rmi1;Rmi1	0;0;0;0;0;0;0;-4032;-3115;-3925;-2702;-3816;-4011;-3730;-3204;0;-2180;0;0;0;0;0;0;0;0;0;0;0;0;0;0;0;4553;4106;-4299;-4314;-4751;-4994	TRUE
11942	cg12277614	0.0000239	0.00000382	6.257757693	1.30E-09	gain	yes	-0.0000263	0.00000649	-4.045041736	0.0000661	neg	ns	-0.000772004	0.001901379	-0.406023196	0.685005676	neg	ns	0.16430583	0.0000261	0.0000654	0.398952329	0.690203007	pos	ns	0.862268357	Psmd14	Psmd14_Exon	2	61761052	61761101	61761052	61761053	50	-	CGTCAGAGTGATTGATGTGTTTGCTATGCCACAGTCAGGAACAGTGAGTA	Exon (Psmd14-201/Psmd14, exon 5 of 12)	2	61711694	61800376	88683	1	Psmd14-201	49358	Psmd14-201;Psmd14-206;Psmd14-207;Psmd14-208	Psmd14;Psmd14;Psmd14;Psmd14	0;0;0;0	TRUE
11636	cg08719385	0.000039	0.0000178	2.189377687	0.029314688	gain	ns	0.000122221	0.0000302	4.040643503	0.0000673	pos	ns	0.033803581	0.008861592	3.814617061	0.000164608	pos	ns	3.783548662	-0.000754784	0.000304749	-2.476737866	0.013792155	neg	ns	0.511250485	Fgf13	Fgf13_fiveUTR	X	59567795	59567844	59567843	59567844	50	+	TGTTTGAACATGTGATGAGCAACGTGTGAGCCTGTTACACCGCAGAGTCG	Promoter (<=1kb)	20	59250885	59567821	316937	2	Fgf13-208	0	Fgf13-203;Fgf13-205;Fgf13-206;Fgf13-208;Fgf13-209	Fgf13;Fgf13;Fgf13;Fgf13;Fgf13	0;0;0;0;0	TRUE
25197	cg07810218	0.0000116	0.000013	0.892239471	0.372956639	gain	ns	0.0000893	0.0000221	4.038751324	0.0000678	pos	ns	0.004192001	0.006480479	0.646865944	0.51819737	pos	ns	0.285504795	-0.000198227	0.000222863	-0.889455889	0.374447814	neg	ns	0.354957653	Pcdh19	Pcdh19_Exon	X	133682157	133682206	133682157	133682158	50	+	CGAGATGCAATGCAGACACTTGCTGTTTTGTCCTTTTATAAAACAGCCGA	Exon (Pcdh19-202/Pcdh19, exon 2 of 6)	20	133582860	133688987	106128	2	Pcdh19-202	6781	Pcdh19-202;Pcdh19-203;Pcdh19-201;Pcdh19-205	Pcdh19;Pcdh19;Pcdh19;Pcdh19	0;0;0;0	TRUE
26368	cg04050203	-0.00000288	0.00000305	-0.946459913	0.344651208	loss	ns	0.0000209	0.00000518	4.037614668	0.0000681	pos	ns	0.002147283	0.001517116	1.415371489	0.157963405	pos	ns	0.801443513	-0.000031	0.0000522	-0.594082237	0.552890387	neg	ns	0.962043926	Htr2c	Htr2c_Intron	X	147169802	147169851	147169850	147169851	50	+	CTATGCTCAATACTTTCGGATTATGTACTGTGAACAACGTACAGACGTCG	Intron (Htr2c-201/Htr2c, intron 5 of 5)	20	146962513	147197274	234762	1	Htr2c-201	207289	Htr2c-201;Htr2c-202;Htr2c-207;Htr2c-203	Htr2c;Htr2c;Htr2c;Htr2c	0;0;0;0	TRUE
15607	cg20031917	0.0000128	0.00000317	4.032637471	0.0000695	gain	ns	-0.0000217	0.00000538	-4.036615816	0.0000684	neg	ns	0.0018553	0.001577143	1.176367935	0.240350416	pos	ns	0.619155122	-0.0000443	0.0000542	-0.816785558	0.414678223	neg	ns	0.928812302	Nfib	Nfib_threeUTR	4	82290345	82290394	82290393	82290394	50	-	GTTCATTTGCAACCCACAAAAAGTACCCAAAGAACGTTATCCTCCAACCG	3' UTR	4	82290173	82505308	215136	2	Nfib-201	214914	Nfib-201;Nfib-203;Nfib-202	Nfib;Nfib;Nfib	0;0;0	TRUE
18419	cg23075928	0.0000182	0.00000372	4.903026192	0.00000153	gain	yes	-0.0000255	0.00000632	-4.033229955	0.0000693	neg	ns	0.008673718	0.001850295	4.687748319	0.00000414	pos	ns	5.382577998	-0.000295844	0.0000636	-4.649337468	0.00000493	neg	ns	0.925425509	Spop	Spop_fiveUTR	11	95470568	95470617	95470616	95470617	50	-	GTTTAACCTTCAAACTGGCGATGTCAAGGGTTCCAAGTCCTCCACCTCCG	5' UTR	11	95414080	95493406	79327	1	Spop-202	56488	Spop-202;Spop-204;Spop-201;Spop-203;Spop-205	Spop;Spop;Spop;Spop;Spop	0;0;0;0;-3702	TRUE
21051	cg22879048	-0.0000285	0.00000929	-3.069338555	0.002334971	loss	ns	0.0000636	0.0000158	4.032508901	0.0000695	pos	ns	0.011060277	0.004622851	2.392522839	0.017328124	pos	ns	1.761248448	-0.00018843	0.000158979	-1.185249822	0.236826467	neg	ns	0.553120947	Vrk1	Vrk1_Intergenic_downstream	12	106173354	106173403	106173354	106173355	50	+	CGAAGCAAACAGGGGGTGAGACTTTGGCGTAATATTTTAATCAAATTGTC	Distal Intergenic	12	106030717	106075409	44693	1	Vrk1-204	142637	NA	NA	NA	FALSE
24777	cg08019530	0.0000128	0.00000404	3.176583017	0.001640289	gain	ns	-0.0000276	0.00000686	-4.032282609	0.0000696	neg	ns	0.001100926	0.002008477	0.548139572	0.58399056	pos	ns	0.233594173	-0.0000736	0.0000691	-1.065498005	0.287479789	neg	ns	0.896669126	Tial1	Tial1_Exon	7	128448716	128448765	128448764	128448765	50	-	TATGCTGCAAAACAGAAAATCCAACAGAAGAGTTGACCCTTCTGCTATCG	Exon (Tial1-202/Tial1, exon 3 of 12)	7	128439777	128461672	21896	2	Tial1-202	12907	Tial1-202;Tial1-208;Tial1-203;Tial1-211;Tial1-206;Tial1-214;Tial1-201;Tial1-204;Tial1-209;Tial1-205;Tial1-210;Tial1-212;Tial1-213;Tial1-207	Tial1;Tial1;Tial1;Tial1;Tial1;Tial1;Tial1;Tial1;Tial1;Tial1;Tial1;Tial1;Tial1;Tial1	0;0;0;0;0;0;0;0;0;0;0;0;-146;0	TRUE
659	cg03474625	0.000052	0.0000103	5.025092136	0.000000852	gain	yes	0.0000709	0.0000176	4.030324499	0.0000701	pos	ns	0.026632438	0.005150346	5.170999672	0.000000418	pos	ns	6.378349191	-0.000343938	0.00017712	-1.941838647	0.053062344	neg	ns	0.550667575	Ppp1r3f	Ppp1r3f_Exon	X	7573259	7573308	7573259	7573260	50	-	CGGCTTCATGCAGCTCTTCAGCTGCCTGGCCTCAGCCTCCACGGGACCCT	Promoter (<=1kb)	20	7557296	7574283	16988	2	Ppp1r3f-205	975	Foxp3-209;Ppp1r3f-205;Ppp1r3f-201;Ppp1r3f-203	Foxp3;Ppp1r3f;Ppp1r3f;Ppp1r3f	-336;0;0;-416	TRUE
20064	cg14450387	0.0000148	0.00000777	1.908411184	0.057261564	gain	ns	-0.0000532	0.0000132	-4.028520978	0.0000707	neg	ns	0.019505646	0.003866586	5.044668598	0.000000775	pos	ns	6.11065346	-0.000852671	0.000132972	-6.412431418	5.34E-10	neg	yes	0.820000542	Rundc3a	Rundc3a_Exon	11	102402015	102402064	102402015	102402016	50	-	CGGCTCCCTGGCCTCCATTCCCAGCTGCAAGTCCCTGGCGAGCTTCAAAT	Exon (Rundc3a-201/Rundc3a, exon 11 of 11)	11	102393403	102402555	9153	1	Rundc3a-201	8612	Rundc3a-202;Rundc3a-203;Rundc3a-204;Rundc3a-201;Rundc3a-209;Rundc3a-205;Rundc3a-210;Rundc3a-208;Rundc3a-206;Rundc3a-207;Slc25a39-202;Slc25a39-201;Slc25a39-205;Slc25a39-213;Slc25a39-207;Slc25a39-208;Slc25a39-215;Slc25a39-209;Slc25a39-203;Slc25a39-212;Slc25a39-206;Slc25a39-214;Slc25a39-204;Slc25a39-210;Slc25a39-211	Rundc3a;Rundc3a;Rundc3a;Rundc3a;Rundc3a;Rundc3a;Rundc3a;Rundc3a;Rundc3a;Rundc3a;Slc25a39;Slc25a39;Slc25a39;Slc25a39;Slc25a39;Slc25a39;Slc25a39;Slc25a39;Slc25a39;Slc25a39;Slc25a39;Slc25a39;Slc25a39;Slc25a39;Slc25a39	0;0;0;0;0;0;0;0;0;2157;5425;5480;2429;5442;5444;5392;4752;5423;5399;5251;4891;5319;5882;4744;4820	TRUE
9558	cg10227581	0.00000635	0.00000554	1.146291482	0.252558604	gain	ns	-0.0000379	0.00000941	-4.026400913	0.0000713	neg	ns	-0.004090433	0.002758056	-1.48308576	0.139067539	neg	ns	0.85677423	0.000164789	0.0000948	1.737375935	0.083314012	pos	ns	0.871081359	Bicd2	Bicd2_Intron	13	49352951	49353000	49352999	49353000	50	+	TGCCCAGGGATGAATTCCCAGTTTTCTAAAAGCAGCTTAGCATTTGGACG	Intron (Bicd2-201/Bicd2, intron 1 of 6)	13	49341585	49387019	45435	1	Bicd2-201	11366	Bicd2-201;Bicd2-202;Bicd2-203	Bicd2;Bicd2;Bicd2	0;0;0	TRUE
22299	cg17489709	-0.0000348	0.00000505	-6.893307677	3.06E-11	loss	yes	-0.0000346	0.00000858	-4.025605395	0.0000715	neg	ns	0.003755416	0.002514689	1.493391773	0.136351742	pos	ns	0.865339309	-0.000157504	0.0000865	-1.821274224	0.069528931	neg	ns	0.855255268	Setd5	Setd5_Exon	6	113109620	113109669	113109620	113109621	50	+	CGTTTGTGTTTGTCATTAGGGACACCTTGTATCTCAGGTGCCTGCCTTCA	Exon (Setd5-204/Setd5, exon 1 of 6)	6	113077365	113153435	76071	1	Setd5-201	32255	Setd5-209;Setd5-201;Setd5-206;Setd5-205;Setd5-203;Setd5-212;Setd5-202;Setd5-204;Setd5-210;Setd5-214;Setd5-207	Setd5;Setd5;Setd5;Setd5;Setd5;Setd5;Setd5;Setd5;Setd5;Setd5;Setd5	0;0;0;0;0;0;0;0;0;0;0	TRUE
9121	cg27342032	-0.0000697	0.0000318	-2.192423574	0.02909203	loss	ns	0.00021735	0.000054	4.02547762	0.0000715	pos	ns	0.014547531	0.015818273	0.919666158	0.358462299	pos	ns	0.445556515	0.000306761	0.000543989	0.563909358	0.573223538	pos	ns	0.434466352	Samd4	Samd4_Exon	14	47016612	47016661	47016660	47016661	50	+	CACCAAAGACAGAACTCTGATGACAAGCTCAATGGGTGGCAGAACTCTCG	Exon (Samd4-201/Samd4, exon 3 of 13)	14	46882854	47103150	220297	1	Samd4-201	133758	Samd4-201;Samd4-211;Samd4-202;Samd4-206;Samd4-203	Samd4;Samd4;Samd4;Samd4;Samd4	0;0;0;0;0	TRUE
7625	cg12958012	0.000247485	0.0000141	17.54255431	2.47E-48	gain	yes	-0.0000965	0.000024	-4.024838391	0.0000717	neg	ns	-0.001914818	0.007021538	-0.272706297	0.785260559	neg	ns	0.104986215	0.000237751	0.00024147	0.984596484	0.325590141	pos	ns	0.302148627	Zbtb20	Zbtb20_Intron	16	43503441	43503490	43503441	43503442	50	+	CGGAGATTTGTGCATTGTGTCTGGTTTCCTACGGGCAGGCTGACCCAGTG	Intron (Zbtb20-211/Zbtb20, intron 4 of 4)	16	42907542	43569781	662240	1	Zbtb20-211	595899	Zbtb20-211;Zbtb20-217;Zbtb20-204;Zbtb20-215;Zbtb20-201;Zbtb20-203;Zbtb20-214;Zbtb20-213;Zbtb20-219;Zbtb20-216;Zbtb20-208;Zbtb20-207;Zbtb20-220;Zbtb20-206;Zbtb20-221;Zbtb20-202	Zbtb20;Zbtb20;Zbtb20;Zbtb20;Zbtb20;Zbtb20;Zbtb20;Zbtb20;Zbtb20;Zbtb20;Zbtb20;Zbtb20;Zbtb20;Zbtb20;Zbtb20;Zbtb20	0;0;0;0;0;0;0;0;0;0;0;0;0;0;0;0	TRUE
23373	cg18589741	-0.0000066	0.0000125	-0.528034086	0.597853443	loss	ns	0.0000855	0.0000212	4.024359385	0.0000719	pos	ns	-0.005498558	0.006221348	-0.88382106	0.377477734	neg	ns	0.423108661	0.000368866	0.000213952	1.72406159	0.085693646	pos	ns	0.601991803	Sox21	Sox21_Intergenic_downstream	14	118194772	118194821	118194820	118194821	50	+	GGATTCCTTCCAACATATGTTTTTGCCAGATAAGTAAACAGTGTGTGTCG	Distal Intergenic	14	118233232	118237030	3799	2	Sox21-201	42209	NA	NA	NA	FALSE
19845	cg23438859	-0.00000366	0.00000864	-0.423584515	0.672162591	loss	ns	0.000059	0.0000147	4.021626832	0.0000727	pos	ns	0.007162962	0.004300114	1.665760903	0.096771191	pos	ns	1.014253914	-0.000117659	0.000147881	-0.795636696	0.426852029	neg	ns	0.723438222	Nlgn3	Nlgn3_Intron	X	101307011	101307060	101307059	101307060	50	-	TGAATTCTCTCTCTGTTTTGTTCTCTGTTCTGTGCTGTTGTGTCTCCCCG	Intron (Gm21986-201/Gm21986-201, intron 6 of 10)	20	101299168	101325963	26796	1	Nlgn3-202	7843	Nlgn3-202;Nlgn3-203;Nlgn3-206;Nlgn3-201;Nlgn3-205	Nlgn3;Nlgn3;Nlgn3;Nlgn3;Nlgn3	0;0;0;0;0	TRUE
27568	cg26959509	0.0000137	0.0000251	0.547915256	0.584144394	gain	ns	0.000171158	0.0000426	4.018259809	0.0000736	pos	ns	0.027570677	0.012478879	2.209387329	0.027878529	pos	ns	1.554730146	-0.000479023	0.000429148	-1.116220297	0.265192303	neg	ns	0.355753278	Tshz2	Tshz2_Intron	2	169962082	169962131	169962130	169962131	50	+	TGTCACACATTGTCTAGAGAAAGTTGTGCCTGGCAATCTTCCCTGTTTCG	Intron (Tshz2-203/Tshz2, intron 1 of 1)	2	169884893	170071816	186924	1	Tshz2-203	77189	Tshz2-203;Tshz2-205	Tshz2;Tshz2	0;0	TRUE
12954	cg18203890	-0.00000516	0.00000604	-0.853120907	0.394250935	loss	ns	-0.0000412	0.0000103	-4.017520093	0.0000739	neg	ns	-0.010442475	0.003007843	-3.47174923	0.000590518	neg	ns	3.228766934	0.000170605	0.000103439	1.649319461	0.100095118	pos	ns	0.845939936	Fmr1	Fmr1_Exon	X	68712235	68712284	68712283	68712284	50	-	TAATTCTGAAGCATCAAATGCTTCTGAAACAGAATCTGACCACAGAGACG	Exon (Fmr1-201/Fmr1, exon 15 of 17)	20	68678541	68717963	39423	1	Fmr1-201	33694	Fmr1-201;Fmr1-213;Fmr1-205;Fmr1-203;Fmr1-204;Fmr1-206;Fmr1-202;Fmr1-208	Fmr1;Fmr1;Fmr1;Fmr1;Fmr1;Fmr1;Fmr1;Fmr1	0;33653;0;0;0;0;0;0	TRUE
18000	cg08257516	0.0000281	0.000011	2.546133862	0.011375963	gain	ns	0.0000752	0.0000188	4.010472779	0.000076	pos	ns	0.017400117	0.005493977	3.167126149	0.001692827	pos	ns	2.771387362	-0.000100879	0.000188937	-0.533929448	0.593772999	neg	ns	0.257550202	Arx	Arx_threeUTR	X	93298095	93298144	93298095	93298096	50	+	CGCAATTGCACTCAGCGTGGTATGGTAAAAGTTTGTCCTCCCGTAGATTC	3' UTR	20	93286496	93298357	11862	1	Arx-201	11599	Arx-201;Arx-202	Arx;Arx	0;0	TRUE
14966	cg12985822	0.00000405	0.00000995	0.40655798	0.684613196	gain	ns	0.0000678	0.0000169	4.010257707	0.0000761	pos	ns	-0.004295858	0.004953461	-0.867243694	0.386479292	neg	ns	0.412873772	0.000439442	0.000170349	2.579655729	0.010350171	pos	ns	0.726857333	Ptprd	Ptprd_Exon	4	78214015	78214064	78214015	78214016	50	+	CGCAGGAAGCTTTTAACAAGATGCAGCTGAGCGTGTCGATATCTTATATC	Promoter (2-3kb)	4	77351290	78211961	860672	2	Ptprd-210	-2054	Ptprd-205;Ptprd-211;Ptprd-209;Ptprd-215;Ptprd-210;Ptprd-207;Ptprd-208	Ptprd;Ptprd;Ptprd;Ptprd;Ptprd;Ptprd;Ptprd	0;0;0;0;0;0;0	TRUE
2535	cg22036689	0.0000274	0.0000128	2.144126789	0.032800178	gain	ns	0.0000872	0.0000217	4.009124751	0.0000764	pos	ns	0.016713571	0.006371467	2.623190552	0.009141756	pos	ns	2.038970386	-0.00059583	0.000219114	-2.719265117	0.006911454	neg	ns	0.585867195	Elmo1	Elmo1_Intron	13	20354135	20354184	20354135	20354136	50	-	CGACATAATTACAGGACAGTGTGTAATGTGCAATTAAACTTAACTATGAA	Intron (Elmo1-201/Elmo1, intron 14 of 21)	13	20090619	20608353	517735	1	Elmo1-201	263516	Elmo1-201;Elmo1-207	Elmo1;Elmo1	0;0	TRUE
17284	cg23094735	-0.0000019	0.00000502	-0.377863778	0.705790384	loss	ns	0.0000342	0.00000853	4.007386361	0.0000769	pos	ns	0.00312242	0.002499054	1.249440941	0.212446375	pos	ns	0.672750674	0.0000478	0.0000859	0.555827193	0.578729919	pos	ns	0.882772253	Cks1b	Cks1b_threeUTR	3	89416271	89416320	89416319	89416320	50	-	GACCTGGTTCATGGATCATATAATGGACCCATCCCTGACTCTGCTGAACG	3' UTR	3	89415472	89418383	2912	2	Cks1b-201	2063	Cks1b-201;Cks1b-202;Cks1b-203;Flad1-201;Flad1-204;Flad1-202;Flad1-203;Flad1-205;Shc1-201;Shc1-204;Shc1-210;Shc1-209;Shc1-205;Shc1-203;Shc1-208	Cks1b;Cks1b;Cks1b;Flad1;Flad1;Flad1;Flad1;Flad1;Shc1;Shc1;Shc1;Shc1;Shc1;Shc1;Shc1	0;0;0;-4401;-4408;-4402;-4490;-4401;0;0;0;0;0;0;0	TRUE
27937	cg26334717	-0.000021	0.0000137	-1.525014644	0.128274972	loss	ns	0.0000935	0.0000233	4.005610578	0.0000775	pos	ns	0.014631932	0.006837536	2.139942327	0.033139805	pos	ns	1.479650051	-0.00016725	0.000235142	-0.711270625	0.477451393	neg	ns	0.732696917	Rps6kc1	Rps6kc1_Intergenic_downstream	1	190690916	190690965	190690916	190690917	50	-	CGAGGCAGTGCTGCAGCTGCCAGGCAATAACTTAGATAGTTACAGCTGCC	Distal Intergenic	1	190808888	190810463	1576	2	Rps6kc1-207	119547	NA	NA	NA	FALSE
18128	cg23701418	0.000170089	0.0000101	16.76265466	2.41E-45	gain	yes	-0.000069	0.0000172	-4.003286089	0.0000782	neg	ns	0.0025686	0.005050228	0.508610685	0.611386905	pos	ns	0.213683867	-0.000101263	0.000173677	-0.583052597	0.56028179	neg	ns	0.255410211	Spag9	Spag9_Exon	11	94044436	94044485	94044484	94044485	50	+	CTTAGTATCTCTCTCTGTTTTGCTGCTTGTGCACTTTTCTATTTCTACCG	Exon (Spag9-207/Spag9, exon 1 of 16)	11	93996103	94050649	54547	1	Spag9-208	48333	Spag9-209;Spag9-208;Spag9-202;Spag9-212;Spag9-207;Spag9-206;Spag9-203;Spag9-204;Spag9-205;Spag9-201	Spag9;Spag9;Spag9;Spag9;Spag9;Spag9;Spag9;Spag9;Spag9;Spag9	0;0;0;0;0;0;0;0;0;0	TRUE
11021	cg19633001	0.000000661	0.0000183	0.036176739	0.971164717	gain	ns	0.000124301	0.0000311	4.003027817	0.0000783	pos	ns	0.032321989	0.009097094	3.553001591	0.000440117	pos	ns	3.356431595	-0.000547962	0.000312848	-1.751526261	0.080844212	neg	ns	0.209271513	Mbip	Mbip_Intergenic_downstream	12	56302074	56302123	56302122	56302123	50	-	ATGATGTGGGGTTTTCGATAAGTGCCTCATCAGTATCCTCATCATGCTCG	Distal Intergenic	12	56340511	56345821	5311	2	Mbip-202	43747	NA	NA	NA	FALSE
8820	cg23333310	0.000131562	0.0000116	11.32887356	3.97E-25	gain	yes	-0.0000789	0.0000197	-3.999960504	0.0000793	neg	ns	0.027447177	0.005779884	4.748741952	0.00000313	pos	ns	5.504008296	-0.000964618	0.00019877	-4.852943051	0.00000193	neg	ns	0.760248699	Clint1	Clint1_Intron	11	45886658	45886707	45886658	45886659	50	-	CGAGTGCAGAATCCAAGACGTGGGGCCCTAGAGTATTAATTAGTGAAGAC	Intron (Clint1-201/Clint1, intron 4 of 11)	11	45851964	45910625	58662	1	Clint1-201	34694	Clint1-201;Clint1-202;Clint1-203	Clint1;Clint1;Clint1	0;0;0	TRUE
14312	cg10616581	0.00012783	0.0000174	7.345202808	1.83E-12	gain	yes	-0.000118244	0.0000296	-3.999353067	0.0000795	neg	ns	0.027430027	0.008661758	3.166796907	0.001694684	pos	ns	2.770911254	-0.001042459	0.000297877	-3.499626779	0.000534194	neg	ns	0.359321696	Smg6	Smg6_Intron	11	75147350	75147399	75147398	75147399	50	-	ATATGCGTGAACCCTGGAGTCTGTGCCGAGGTGGCTGTAAAACAGGGCCG	Intron (Smg6-201/Smg6, intron 15 of 18)	11	74925823	75164448	238626	1	Smg6-201	221527	Smg6-201;Smg6-202	Smg6;Smg6	0;0	TRUE
24645	cg27582354	0.0000036	0.0000112	0.32036004	0.748911243	gain	ns	-0.0000763	0.0000191	-3.999199794	0.0000795	neg	ns	0.008935327	0.005590086	1.598423838	0.1109674	pos	ns	0.954804591	-0.000688902	0.000192243	-3.583501387	0.000393581	neg	ns	0.918837717	R3hdm2	R3hdm2_threeUTR	10	127458817	127458866	127458865	127458866	50	+	TTCAAGAAGTTCCCTCAGATGACCTCATATCACCGGATGCTATTACACCG	3' UTR	10	127380662	127499360	118699	1	R3hdm2-212	78155	R3hdm2-212;R3hdm2-202;R3hdm2-204;R3hdm2-201;R3hdm2-218;R3hdm2-208;R3hdm2-210;R3hdm2-205;R3hdm2-203;R3hdm2-211;R3hdm2-207;R3hdm2-216;R3hdm2-221	R3hdm2;R3hdm2;R3hdm2;R3hdm2;R3hdm2;R3hdm2;R3hdm2;R3hdm2;R3hdm2;R3hdm2;R3hdm2;R3hdm2;R3hdm2	0;0;0;0;0;0;0;0;0;0;0;0;0	TRUE
25072	cg24187520	-0.0000283	0.0000107	-2.645833706	0.008564654	loss	ns	-0.0000725	0.0000181	-3.99843873	0.0000798	neg	ns	0.022838264	0.005314367	4.29745672	0.0000232	pos	ns	4.63529702	-0.000976322	0.000182761	-5.342078556	0.000000178	neg	yes	0.89965478	Rbbp5	Rbbp5_Exon	1	132498035	132498084	132498035	132498036	50	-	CGAAACTCTACAAAGGGGACAGAGGTTTACCTCTGGAAGGATCAGCGAAG	Exon (Rbbp5-206/Rbbp5, exon 13 of 14)	1	132477365	132504490	27126	1	Rbbp5-206	20670	Rbbp5-206;Rbbp5-207;Rbbp5-202;Rbbp5-201	Rbbp5;Rbbp5;Rbbp5;Rbbp5	0;0;0;0	TRUE
24198	cg20121509	0.0000487	0.0000143	3.413452085	0.000726716	gain	ns	-0.0000969	0.0000242	-3.997820546	0.00008	neg	ns	0.021824189	0.007100071	3.07379848	0.002301375	pos	ns	2.63801257	-0.000968955	0.000244171	-3.968349947	0.00009	neg	ns	0.735412031	Pabpc4	Pabpc4_threeUTR	4	123295714	123295763	123295762	123295763	50	+	CGCCAACACTGATGTGCATTTGCTGGTCTGTTGTAGGGTCTGAGTGCCCG	3' UTR	4	123282825	123298925	16101	1	Pabpc4-204	12889	Pabpc4-204;Pabpc4-203;Pabpc4-208;Pabpc4-202;Pabpc4-201;Pabpc4-205;Pabpc4-206	Pabpc4;Pabpc4;Pabpc4;Pabpc4;Pabpc4;Pabpc4;Pabpc4	0;0;0;0;0;0;-1417	TRUE
14876	cg11125928	0.0000222	0.00000375	5.937045326	7.77E-09	gain	yes	-0.0000254	0.00000636	-3.994468901	0.000081	neg	ns	-0.004177335	0.001864486	-2.240475879	0.025768143	neg	ns	1.588916874	0.0000749	0.0000641	1.167577957	0.243874293	pos	ns	0.904625893	Flot2	Flot2_fiveUTR	11	78053346	78053395	78053394	78053395	50	+	CCCTGGCTGCTCCTCAGACTGTCTCTGGAGGTTATGACCATCCTGTGTCG	5' UTR	11	78037931	78060434	22504	1	Flot2-201	15415	Flot2-201;Flot2-205;Flot2-203;Flot2-202;Flot2-204	Flot2;Flot2;Flot2;Flot2;Flot2	0;0;0;0;0	TRUE
12232	cg24399485	0.0000327	0.0000068	4.812558313	0.00000233	gain	ns	-0.0000462	0.0000116	-3.994618535	0.000081	neg	ns	0.018353088	0.003386212	5.419947281	0.00000012	pos	ns	6.920845928	-0.000462777	0.000116452	-3.973986609	0.000088	neg	ns	0.858574959	Ptch1	Ptch1_Intron	13	63554647	63554696	63554695	63554696	50	-	GGAGGTAAGCTTTGGCGGCCCTGACCTGCAGCTGGAACACAATACTTTCG	Intron (Ptch1-201/Ptch1, intron 2 of 22)	13	63508328	63565735	57408	2	Ptch1-201	11039	Ptch1-201;Ptch1-204;Ptch1-206;Ptch1-202;Ptch1-207;Ptch1-203;Ptch1-205	Ptch1;Ptch1;Ptch1;Ptch1;Ptch1;Ptch1;Ptch1	0;0;0;0;0;0;0	TRUE
11670	cg26808264	0.000187086	0.0000117	15.96733513	2.67E-42	gain	yes	-0.0000795	0.0000199	-3.99428772	0.0000811	neg	ns	-0.020936546	0.005831554	-3.590217232	0.000383975	neg	ns	3.41569756	0.000564548	0.000200547	2.815047915	0.00518913	pos	ns	0.600976629	Tanc1	Tanc1_Exon	2	59772421	59772470	59772421	59772422	50	-	CGATAGCCCCTGCTCAACCTTGAATAGCTGTGTCAGCAAGACGGCAGCCA	Exon (Tanc1-203/Tanc1, exon 7 of 27)	2	59612042	59845717	233676	1	Tanc1-203	160379	Tanc1-203;Tanc1-201;Tanc1-208;Tanc1-202;Tanc1-204	Tanc1;Tanc1;Tanc1;Tanc1;Tanc1	0;0;0;0;0	TRUE
19341	cg11122179	-0.0000284	0.00000666	-4.259257989	0.0000272	loss	ns	0.0000452	0.0000113	3.994191469	0.0000811	pos	ns	-0.003404946	0.003315591	-1.02694997	0.305244658	neg	ns	0.515351928	0.000209329	0.000114023	1.835853388	0.067337004	pos	ns	0.854872528	Cdh8	Cdh8_threeUTR	8	99030801	99030850	99030801	99030802	50	+	CGACATCAACACCATTTGGAACTGGAGCAAGCCCTTGCCTTGGCATAAAC	3' UTR	8	99024471	99416427	391957	2	Cdh8-207	385577	Cdh8-207;Cdh8-204;Cdh8-201;Cdh8-206;Cdh8-203	Cdh8;Cdh8;Cdh8;Cdh8;Cdh8	0;0;0;0;0	TRUE
2916	cg19057807	0.0000578	0.00000401	14.41591959	2.07E-36	gain	yes	-0.0000272	0.00000681	-3.994099525	0.0000812	neg	ns	-0.00298632	0.001994048	-1.49761723	0.13525023	neg	ns	0.868861988	0.000174493	0.0000686	2.544551042	0.011426567	pos	ns	0.928908723	Ehbp1	Ehbp1_Intron	11	22053379	22053428	22053427	22053428	50	-	TTTGTGAACGCTCAATTTGCCAAAACTGTTTACAGTGTAATTGGGCACCG	Intron (Ehbp1-201/Ehbp1, intron 20 of 23)	11	22005828	22285838	280011	2	Ehbp1-201	232410	Ehbp1-201;Ehbp1-202;Ehbp1-207	Ehbp1;Ehbp1;Ehbp1	0;0;0	TRUE
15918	cg26885075	-0.0000385	0.0000049	-7.857826679	6.49E-14	loss	yes	0.0000333	0.00000833	3.993486511	0.0000814	pos	ns	0.001964621	0.00243992	0.805199057	0.421321965	pos	ns	0.375385899	-0.000031	0.0000839	-0.369170563	0.712252621	neg	ns	0.884998074	Gm5452	Gm5452_Intron	13	83869284	83869333	83869284	83869285	50	-	CGGTTCACAGACCTCTTGAAGGAAAGTTTGTTTTCCACTCATAGATGAAA	Intron (C130071C03Rik-204/C130071C03Rik-204, intron 3 of 3)	13	83832340	83833336	997	1	Gm5452-201	36993	NA	NA	NA	TRUE
19812	cg08477918	0.000153431	0.0000158	9.739776395	9.88E-20	gain	yes	-0.000106866	0.0000268	-3.993146941	0.0000815	neg	ns	0.071977662	0.007840469	9.18027471	6.28E-18	pos	yes	17.20226099	-0.001435466	0.000269633	-5.323775467	0.000000195	neg	yes	0.72672551	Fchsd2	Fchsd2_Exon	7	101246313	101246362	101246313	101246314	50	-	CGCCCAACTGGTGGATATTGAGCTCTCCCCTGTCAGTGCTCTGAGAATGA	Exon (Fchsd2-201/Fchsd2, exon 11 of 21)	7	101108733	101284405	175673	1	Fchsd2-201	137580	Fchsd2-201;Fchsd2-202;Fchsd2-207;Fchsd2-210	Fchsd2;Fchsd2;Fchsd2;Fchsd2	0;0;0;-4480	TRUE
24908	cg05759182	-0.00000225	0.00000129	-1.751176043	0.08090461	loss	ns	0.00000873	0.00000219	3.992990929	0.0000815	pos	ns	0.00148051	0.000640631	2.311018879	0.021487653	pos	ns	1.667811023	-0.0000294	0.000022	-1.335666637	0.182638052	neg	ns	0.050641948	Sfswap	Sfswap_Exon	5	129501543	129501592	129501591	129501592	50	+	ACAGGGACAGCACCTCATCCCCTGGATGGGGGACCACAAGATCCTCATCG	Promoter (<=1kb)	5	129501221	129571384	70164	1	Sfswap-201	322	Sfswap-201;Sfswap-204;Sfswap-212;Sfswap-213;Sfswap-214;Sfswap-208;Sfswap-203;Sfswap-215	Sfswap;Sfswap;Sfswap;Sfswap;Sfswap;Sfswap;Sfswap;Sfswap	0;0;0;0;0;0;0;-2749	TRUE
8875	cg23927870	0.0000408	0.00000452	9.022693512	1.97E-17	gain	yes	-0.0000307	0.00000768	-3.992373468	0.0000817	neg	ns	0.012497966	0.002249345	5.556267758	5.94E-08	pos	ns	7.226199041	-0.000171651	0.0000774	-2.219005174	0.027210189	neg	ns	0.905948317	Gbf1	Gbf1_Intron	19	46173749	46173798	46173797	46173798	50	-	ACGGAGTGTGTTTGATCAGGTGTGGCAGGAATATCCACTGTCAAGCTGCG	Intron (Gbf1-201/Gbf1, intron 3 of 39)	19	46152509	46286510	134002	1	Gbf1-201	21240	Gbf1-201;Gbf1-204;Gbf1-214;Gbf1-207;Gbf1-216	Gbf1;Gbf1;Gbf1;Gbf1;Gbf1	0;0;0;0;21169	TRUE
13473	cg14261993	-0.00000288	0.00000443	-0.649892849	0.516242723	loss	ns	-0.00003	0.00000752	-3.99037331	0.0000824	neg	ns	-0.002444301	0.002203489	-1.109286762	0.268166286	neg	ns	0.571595822	-0.000142141	0.0000758	-1.875761344	0.06162769	neg	ns	0.875665619	Xpo7	Xpo7_Intron	14	70684707	70684756	70684755	70684756	50	+	CTAAGCACAGCTTGTCACACACTCAAATGCACAATTTTCTGACGCAAACG	Intron (Xpo7-202/Xpo7, intron 15 of 27)	14	70654246	70766628	112383	2	Xpo7-202	81872	Xpo7-202;Xpo7-201;Xpo7-206;Xpo7-203;Xpo7-204;Xpo7-205	Xpo7;Xpo7;Xpo7;Xpo7;Xpo7;Xpo7	0;0;0;0;0;0	TRUE
4967	cg06444905	-0.0000286	0.00000973	-2.934223079	0.003593446	loss	ns	-0.000066	0.0000165	-3.98918578	0.0000828	neg	ns	0.01087225	0.004845009	2.244010498	0.025537226	pos	ns	1.592826287	-0.000667571	0.000166619	-4.006558749	0.0000772	neg	ns	0.78909519	Fubp3	Fubp3_threeUTR	2	31596583	31596632	31596631	31596632	50	-	TCTTCTTATAGAGAGTTCTGGGATTCCAGAGAGGCCCTGTGTACTTACCG	3' UTR	2	31572651	31617526	44876	1	Fubp3-202	23932	Fubp3-202;Fubp3-208;Fubp3-211;Fubp3-201;Fubp3-210	Fubp3;Fubp3;Fubp3;Fubp3;Fubp3	0;23792;0;0;0	TRUE
11463	cg25517295	-0.0000595	0.0000112	-5.299003472	0.000000221	loss	yes	-0.0000761	0.0000191	-3.988851929	0.0000829	neg	ns	0.029126194	0.005591027	5.209453129	0.000000346	pos	ns	6.460854273	-0.00133074	0.000192275	-6.921023592	2.58E-11	neg	yes	0.738899343	Hnrnpk	Hnrnpk_fiveUTR	13	58397883	58397932	58397883	58397884	50	-	CGAGCACATTTTTGGGCATAGCCAACCAGGGTTTTCACATGGGCGTTCAG	5' UTR	13	58391142	58403343	12202	2	Hnrnpk-202	5411	Hnrnpk-202;Hnrnpk-224;Hnrnpk-221;Hnrnpk-232;Hnrnpk-216;Hnrnpk-201;Hnrnpk-205;Hnrnpk-217;Hnrnpk-206;Hnrnpk-209;Hnrnpk-213;Hnrnpk-227;Hnrnpk-234;Hnrnpk-233;Hnrnpk-228;Hnrnpk-214;Hnrnpk-215;Hnrnpk-211;Hnrnpk-208;Hnrnpk-212;Hnrnpk-231;Hnrnpk-230;Hnrnpk-203;Hnrnpk-218;Hnrnpk-226;Hnrnpk-207;Hnrnpk-219;Hnrnpk-225;Hnrnpk-229;Hnrnpk-223;Hnrnpk-220;Hnrnpk-210;Hnrnpk-204;Hnrnpk-222;Rmi1-205;Rmi1-201;Rmi1-204	Hnrnpk;Hnrnpk;Hnrnpk;Hnrnpk;Hnrnpk;Hnrnpk;Hnrnpk;Hnrnpk;Hnrnpk;Hnrnpk;Hnrnpk;Hnrnpk;Hnrnpk;Hnrnpk;Hnrnpk;Hnrnpk;Hnrnpk;Hnrnpk;Hnrnpk;Hnrnpk;Hnrnpk;Hnrnpk;Hnrnpk;Hnrnpk;Hnrnpk;Hnrnpk;Hnrnpk;Hnrnpk;Hnrnpk;Hnrnpk;Hnrnpk;Hnrnpk;Hnrnpk;Hnrnpk;Rmi1;Rmi1;Rmi1	0;0;0;0;0;0;0;-4015;-3098;-3908;-2685;-3799;-3994;-3713;-3187;0;-2163;0;0;0;0;0;0;0;0;0;0;0;0;0;0;0;4570;4123;-4316;-4331;-4768	TRUE
6840	cg18224101	-0.00000287	0.00000363	-0.790203263	0.43001312	loss	ns	-0.0000246	0.00000616	-3.988307771	0.0000831	neg	ns	-0.000166352	0.001805235	-0.092149983	0.926638397	neg	ns	0.033089708	-0.0000868	0.0000621	-1.398663231	0.162913625	neg	ns	0.880587403	Nr6a1	Nr6a1_Exon	2	38738997	38739046	38738997	38738998	50	+	CGTAGAGCTCAAGAGGCACGTGTAATCCTTGATTGAGAGCTCGCAGAAGA	Exon (Nr6a1-202/Nr6a1, exon 9 of 12)	2	38723370	38927688	204319	2	Nr6a1-202	188642	Nr6a1-202;Nr6a1-210;Nr6a1-201;Nr6a1-204;Nr6a1-205;Nr6a1-207;Nr6a1-206;Nr6a1-208;Nr6a1-209;Nr6a1-211	Nr6a1;Nr6a1;Nr6a1;Nr6a1;Nr6a1;Nr6a1;Nr6a1;Nr6a1;Nr6a1;Nr6a1	0;0;0;0;0;45474;46065;0;45423;24719	TRUE
13150	cg07900685	0.0000107	0.0000035	3.056121627	0.002437199	gain	ns	-0.0000237	0.00000595	-3.985189526	0.0000841	neg	ns	-0.003753831	0.001743754	-2.152729965	0.032111309	neg	ns	1.493341986	0.0000228	0.00006	0.380102054	0.70412995	pos	ns	0.82779359	Ikzf2	Ikzf2_Exon	1	69577793	69577842	69577841	69577842	50	-	TTTTATGTACCATAAGCACATTGGGCCCAATGCAAACCATGCCACAGACG	Exon (Ikzf2-201/Ikzf2, exon 4 of 8)	1	69531214	69685821	154608	2	Ikzf2-201	107979	Ikzf2-201;Ikzf2-207;Ikzf2-202;Ikzf2-204;Ikzf2-208;Ikzf2-209;Ikzf2-206	Ikzf2;Ikzf2;Ikzf2;Ikzf2;Ikzf2;Ikzf2;Ikzf2	0;0;0;0;0;0;107458	TRUE
13951	cg26399970	0.0000363	0.0000164	2.208936968	0.02791017	gain	ns	0.000111201	0.0000279	3.984836668	0.0000842	pos	ns	0.034412605	0.008175535	4.209217663	0.0000336	pos	ns	4.473569916	-0.000835525	0.000281156	-2.971748515	0.003192882	neg	ns	0.417920605	Slc6a8	Slc6a8_fiveUTR	X	73673531	73673580	73673531	73673532	50	-	CGGGCCCCCGACACACATGAGATTCTTCAGGCTCACTTTCAAGTGCTTCG	Promoter (<=1kb)	20	73673150	73682502	9353	1	Slc6a8-201	381	Slc6a8-201;Slc6a8-204;Slc6a8-206;Slc6a8-203;Slc6a8-205;Slc6a8-210;Slc6a8-213;Slc6a8-202;Slc6a8-209;Slc6a8-212	Slc6a8;Slc6a8;Slc6a8;Slc6a8;Slc6a8;Slc6a8;Slc6a8;Slc6a8;Slc6a8;Slc6a8	0;0;0;0;0;0;0;0;-3479;-4574	TRUE
26862	cg00897651	0.00000237	0.00000186	1.275276415	0.203166298	gain	ns	0.0000126	0.00000315	3.984544748	0.0000843	pos	ns	0.002363009	0.000923574	2.558549875	0.0109859	pos	ns	1.959164368	0.0000117	0.0000318	0.368239318	0.712946118	pos	ns	0.052568787	4930404H24Rik	4930404H24Rik_Promoter	2	153492894	153492943	153492942	153492943	50	+	TTAGATACCAGCTGTCAGTGCAGGGGGGACGGCTCCGCGGCTGCAGCCCG	Promoter (<=1kb)	2	153492790	153493841	1052	1	4930404H24Rik-201	104	4930404H24Rik-201;Nol4l-201;Nol4l-203	4930404H24Rik;Nol4l;Nol4l	0;0;0	TRUE
17991	cg21426639	0.0000167	0.0000144	1.165399613	0.244753195	gain	ns	0.0000972	0.0000244	3.980407138	0.0000857	pos	ns	0.020710113	0.007151126	2.89606324	0.004047411	pos	ns	2.392822676	-0.000304918	0.000245927	-1.239874478	0.215959543	neg	ns	0.381643035	Arx	Arx_Promoter	X	93282789	93282838	93282837	93282838	50	+	ATTGTTGTTTTCTCTCTCTCTTTCTCTCCTCCTAACACTGCAATAACGCG	Promoter (3-4kb)	20	93286445	93288382	1938	1	Arx-203	-3607	Arx-203;Arx-201;Arx-202	Arx;Arx;Arx	-3607;0;0	FALSE
5625	cg18128160	-0.0000284	0.00000649	-4.379386941	0.0000163	loss	ns	-0.0000439	0.000011	-3.979081688	0.0000862	neg	ns	0.00923527	0.003230045	2.859176786	0.004535355	pos	ns	2.34338867	-0.000365109	0.000111081	-3.286871963	0.001129365	neg	ns	0.806360405	Fam193a	Fam193a_Exon	5	34410699	34410748	34410699	34410700	50	-	CGAGCAAATTGGCCCTTTCCATGGCTCCCAAGGGCAACAGCGTGCTGCAC	Exon (Fam193a-202/Fam193a, exon 2 of 21)	5	34369933	34486456	116524	1	Fam193a-202	40766	Fam193a-202	Fam193a	0	TRUE
10975	cg08262939	-0.000033	0.0000132	-2.490499283	0.013279646	loss	ns	0.0000895	0.0000225	3.978187483	0.0000865	pos	ns	0.000581779	0.006588742	0.088298949	0.929696088	pos	ns	0.031658997	0.0000607	0.000226586	0.267726245	0.789088089	pos	ns	0.52481787	Brms1l	Brms1l_Intergenic_downstream	12	55939695	55939744	55939695	55939696	50	+	CGTTGCTATAGCAACAGAATCTGCCTCCCAGCACCACAAGAGAAGCTATG	Distal Intergenic	12	55844192	55865983	21792	1	Brms1l-206	95503	NA	NA	NA	FALSE
15939	cg16242270	0.0000188	0.0000111	1.682337687	0.093510297	gain	ns	0.0000753	0.0000189	3.977867421	0.0000866	pos	ns	0.00245545	0.00554807	0.442577251	0.658380182	pos	ns	0.18152325	0.000124429	0.000190798	0.652150649	0.514787237	pos	ns	0.774214319	Dmd	Dmd_Exon	X	83928886	83928935	83928886	83928887	50	+	CGCAATGGCAGTGGAGCCAACTCAGATCCAGCTCAGCAAGCGCTGGCGGG	Exon (Dmd-203/Dmd, exon 41 of 79)	20	82948903	85206141	2257239	1	Dmd-203	979983	Dmd-203;Dmd-215;Dmd-209	Dmd;Dmd;Dmd	0;0;0	TRUE
27097	cg16384274	0.0000162	0.00000526	3.073853676	0.002300962	gain	ns	-0.0000355	0.00000893	-3.976659036	0.000087	neg	ns	0.009601152	0.002615505	3.670859743	0.000284562	pos	ns	3.545823758	-0.000318748	0.0000899	-3.543730996	0.000455255	neg	ns	0.894044052	Srsf11	Srsf11_Exon	3	158026740	158026789	158026740	158026741	50	+	CGACTATCAAAGCTCTGTCAACGAATACAGTGTTTGTCAGATGCTGTGCC	Exon (Srsf11-204/Srsf11, exon 3 of 13)	3	158010473	158036639	26167	2	Srsf11-204	9850	Srsf11-204;Srsf11-213;Srsf11-202;Srsf11-207;Srsf11-201;Srsf11-217;Srsf11-218;Srsf11-206;Srsf11-209;Srsf11-210;Srsf11-212;Srsf11-203;Srsf11-208;Srsf11-215;Srsf11-219;Srsf11-216	Srsf11;Srsf11;Srsf11;Srsf11;Srsf11;Srsf11;Srsf11;Srsf11;Srsf11;Srsf11;Srsf11;Srsf11;Srsf11;Srsf11;Srsf11;Srsf11	0;0;0;-3600;0;-4736;0;0;0;0;0;0;0;0;4965;9825	TRUE
19837	cg24618784	0.00000838	0.00000654	1.281351663	0.201027808	gain	ns	0.0000442	0.0000111	3.975171161	0.0000876	pos	ns	0.004076212	0.003255662	1.252037669	0.211499956	pos	ns	0.674689718	-0.000148394	0.000111962	-1.325398465	0.186014981	neg	ns	0.749254556	Nlgn3	Nlgn3_fiveUTR	X	101301874	101301923	101301874	101301875	50	+	CGAGAGCTCAGTTTTGAGGTTCAAGTCAGTGTGGCCATGAAGGGGCTGCC	5' UTR	20	101299168	101325963	26796	1	Nlgn3-202	2706	Med12-204;Med12-203;Med12-201;Med12-202;Med12-208;Med12-206;Nlgn3-202;Nlgn3-203;Nlgn3-206;Nlgn3-201;Nlgn3-205	Med12;Med12;Med12;Med12;Med12;Med12;Nlgn3;Nlgn3;Nlgn3;Nlgn3;Nlgn3	0;0;0;0;0;5305;0;0;0;0;0	TRUE
17292	cg09025625	0.0000659	0.0000097	6.797944358	5.45E-11	gain	yes	-0.0000654	0.0000165	-3.971234294	0.0000889	neg	ns	0.005724151	0.004827791	1.185666641	0.236661998	pos	ns	0.625871473	-0.0001944	0.000166027	-1.170889915	0.242542281	neg	ns	0.277211909	Shc1	Shc1_fiveUTR	3	89422295	89422344	89422343	89422344	50	+	CTGCATCCCAACGACAAAGTCATGGGACCCGGGGTTTCCTACTTGGTTCG	5' UTR	3	89418443	89430015	11573	1	Shc1-201	3852	Cks1b-201;Cks1b-202;Cks1b-203;Shc1-201;Shc1-204;Shc1-210;Shc1-209;Shc1-205;Shc1-203;Shc1-208;Shc1-202;Shc1-206;Shc1-207	Cks1b;Cks1b;Cks1b;Shc1;Shc1;Shc1;Shc1;Shc1;Shc1;Shc1;Shc1;Shc1;Shc1	0;0;0;0;0;0;0;0;0;0;0;0;-2182	TRUE
23370	cg21298229	-0.00000488	0.0000121	-0.403324265	0.686987732	loss	ns	0.0000817	0.0000206	3.970747574	0.0000891	pos	ns	-0.002225046	0.006025729	-0.369257513	0.712187881	neg	ns	0.147405421	0.0000937	0.000207224	0.45210039	0.65151284	pos	ns	0.652528955	Sox21	Sox21_Intergenic_downstream	14	118194626	118194675	118194674	118194675	50	-	CCCGCTGTATCTTCATTTTTCATTGAACTAGCCAGTTTTCTGCGAAGCCG	Distal Intergenic	14	118233232	118237030	3799	2	Sox21-201	42404	NA	NA	NA	FALSE
24788	cg22192672	0.0000625	0.0000119	5.259925547	0.000000269	gain	yes	-0.0000802	0.0000202	-3.970096569	0.0000894	neg	ns	0.004361452	0.005918486	0.736920236	0.461728198	pos	ns	0.335613602	-0.000597613	0.000203536	-2.936152233	0.003571782	neg	ns	0.182061659	Smarcc2	Smarcc2_Promoter	10	128458485	128458534	128458533	128458534	50	-	CTGTGCGGGGAAACCCCATTGGATTTCGAGTCCAACGCCTTAACCACTCG	Promoter (<=1kb)	10	128459248	128490482	31235	1	Smarcc2-205	-763	Smarcc2-205;Smarcc2-201;Smarcc2-202;Smarcc2-203;Smarcc2-206	Smarcc2;Smarcc2;Smarcc2;Smarcc2;Smarcc2	0;0;0;0;0	FALSE
23607	cg09786645	0.0000661	0.0000122	5.422160799	0.000000119	gain	yes	0.0000822	0.0000207	3.968255992	0.00009	pos	ns	0.028237573	0.006071773	4.650630391	0.00000491	pos	ns	5.309290557	-0.000590336	0.000208808	-2.827173345	0.005001454	neg	ns	0.203388407	Dll4	Dll4_Promoter	2	119322230	119322279	119322230	119322231	50	-	CGGCATCTGTCCCAGGCGGGCGGGAAGCTGCTGCATTAAATTGTAAAATC	Promoter (3-4kb)	2	119325784	119335962	10179	1	Dll4-201	-3554	Dll4-201	Dll4	0	TRUE
3803	cg15576772	0.0000272	0.00000402	6.772886468	6.34E-11	gain	yes	-0.0000271	0.00000682	-3.967379733	0.0000903	neg	ns	-0.006860372	0.001999241	-3.43148818	0.000681727	neg	ns	3.166389513	0.0000955	0.0000688	1.38931925	0.16573279	pos	ns	0.915660005	Celf4	Celf4_threeUTR	18	25481726	25481775	25481726	25481727	50	+	CGCCATCATGTCACACTGTGAACTTTGAGTTGATTTGAACTTACGGATGG	3' UTR	18	25477632	25753983	276352	2	Celf4-202	272208	Celf4-202;Celf4-201;Celf4-203;Celf4-207;Celf4-206;Celf4-208;Celf4-204	Celf4;Celf4;Celf4;Celf4;Celf4;Celf4;Celf4	0;0;0;0;0;0;0	TRUE
5781	cg07241706	0.00000459	0.00000217	2.116238809	0.035121299	gain	ns	-0.0000146	0.00000368	-3.966995179	0.0000905	neg	ns	-0.001306001	0.001079299	-1.210044604	0.227183651	neg	ns	0.643622925	-0.0000174	0.0000371	-0.468510654	0.639748718	neg	ns	0.919010303	Gapvd1	Gapvd1_Exon	2	34706705	34706754	34706753	34706754	50	-	AACACTGAGGCCTGGTGTGCTGGGGCGGGAACTGACCTCCCTGACATCCG	Exon (Gapvd1-202/Gapvd1, exon 13 of 27)	2	34674594	34755232	80639	2	Gapvd1-202	48478	Gapvd1-202;Gapvd1-206;Gapvd1-201;Gapvd1-203;Gapvd1-204;Gapvd1-213;Gapvd1-208;Gapvd1-205;Gapvd1-207;Gapvd1-211;Gapvd1-212	Gapvd1;Gapvd1;Gapvd1;Gapvd1;Gapvd1;Gapvd1;Gapvd1;Gapvd1;Gapvd1;Gapvd1;Gapvd1	0;0;0;0;0;0;0;0;0;0;5975	TRUE
4050	cg23025641	-0.0000294	0.0000099	-2.968533387	0.003225528	loss	ns	0.0000667	0.0000168	3.966240188	0.0000907	pos	ns	0.000192821	0.004929322	0.039117152	0.968822166	pos	ns	0.013755934	0.0000382	0.000169519	0.225364128	0.821844509	pos	ns	0.844423039	Gm45647	Gm45647_Intergenic_upstream	8	26661167	26661216	26661215	26661216	50	-	AATGGCCAGTTTATTAGAGCGTTAACCATCCTTGGCAATGGGCTGAGTCG	Distal Intergenic	8	26780315	26780509	195	1	Gm45647-201	-119148	NA	NA	NA	FALSE
15021	cg11275232	0.00000652	0.00000372	1.750430125	0.081033373	gain	ns	-0.0000251	0.00000633	-3.964138655	0.0000915	neg	ns	0.002562741	0.00185305	1.382985802	0.167664517	pos	ns	0.775558838	-0.0000491	0.0000637	-0.770130506	0.441808956	neg	ns	0.893765555	Gphn	Gphn_Exon	12	78522911	78522960	78522911	78522912	50	+	CGGATGAAAGCAAAGGAGTTGCTAGTAGAGTTGGATCCCTCAAAGTAAAT	Exon (Gphn-201/Gphn, exon 9 of 24)	12	78226379	78684772	458394	1	Gphn-201	296532	Gphn-201;Gphn-202	Gphn;Gphn	0;0	TRUE
[truncated: 27,247 more rows]
[truncated: 29 more columns]
