# Supplementary material for: Genetic loci and metabolic states associated with murine epigenetic aging
Source: eLife. 2022 Apr 7;11:e75244. doi: 10.7554/eLife.75244 (PMC9049972; doi:10.7554/eLife.75244)
Supplement: Supplementary file 7. [file elife-75244-supp7.xlsx]

## Sheet: Sheet1
Supplementary file 7. Multivariable regression analysis of entropy by age-effect
Entropy is entropy computed for age-gain CpGs, age-loss CpGs, and age-ns (CpG that were.not strongly associated with age)
Predictor variables were chronological age, diet, final body weight (bwf), strain median lifespan (ls), fasted serum glucose (gluc), total cholesterol (chol)
Batch (96-well plates) included as a covariate
Analysis is R version 4.1.1
age-Gains DMCs							age-loss DMCs							Age-ns
all:							Call:							Call:
lm(formula = d$AgeGain_entropy20bin ~ age + diet + bwf + ls + gluc + chol + batch)							lm(formula = d$AgeLoss_entropy20bin ~ age + diet + bwf + ls + gluc + chol + batch)							lm(formula = d$AgeNS_entropy20bin ~ age + diet + bwf + ls + gluc + gluc + chol + batch)
Residuals:							Residuals:							Residuals:
Min 1Q Median 3Q Max							Min 1Q Median 3Q Max							Min 1Q Median 3Q Max
-0.095762 -0.016106 -0.001893 0.011858 0.114320							-0.115027 -0.026285 -0.004415 0.017118 0.248534							-0.07041 -0.01720 -0.00282 0.01380 0.12763
Coefficients:							Coefficients:							Coefficients:
	Estimate	Std. Error	t value	Pr(>|t|)				Estimate	Std. Error	t value	Pr(>|t|)				Estimate	Std. Error	t value	Pr(>|t|)
(Intercept)	2.69085	0.0174337	154.348	2e-16			(Intercept)	2.37111	0.0278407	85.167	2e-16			(Intercept)	2.53869	0.0164537	154.292	2e-16
age	0.0706385	0.0043201	16.351	2e-16			age	0.0800534	0.006899	11.604	2e-16			age	0.005523	0.0040773	1.355	0.177
dietHFD	0.0180382	0.0054821	3.29	0.001152			dietHFD	-0.0179483	0.0087547	-2.05	0.04144			dietHFD	-0.0059868	0.005174	-1.157	0.248
bwf	-0.0002172	0.0002165	-1.003	0.316926			bwf	0.0012857	0.0003458	3.718	0.00025			bwf	0.0002573	0.0002044	1.259	0.209
ls	-0.0291218	0.0070936	-4.105	5.54e-05			ls	-0.0231421	0.0113281	-2.043	0.04216			ls	-0.0003647	0.0066949	-0.054	0.957
gluc	-0.0022684	0.0006287	-3.608	0.000376			gluc	-0.0030429	0.001004	-3.031	0.00271			gluc	-0.0003261	0.0005933	-0.55	0.583
chol	-0.0023016	0.0027522	-0.836	0.403825			chol	0.0015901	0.004395	0.362	0.71783			chol	-0.0013631	0.0025975	-0.525	0.6
batch	0.0113679	0.0015981	7.113	1.31e-11			batch	0.0053206	0.002552	2.085	0.03815			batch	-0.0076276	0.0015082	-5.057	8.47e-07
---							---							---
Signif. codes: 0 ‘***’ 0.001 ‘**’ 0.01 ‘*’ 0.05 ‘.’ 0.1 ‘ ’ 1							Signif. codes: 0 ‘***’ 0.001 ‘**’ 0.01 ‘*’ 0.05 ‘.’ 0.1 ‘ ’ 1							Signif. codes: 0 ‘***’ 0.001 ‘**’ 0.01 ‘*’ 0.05 ‘.’ 0.1 ‘ ’ 1
Residual standard error: 0.0289 on 239 degrees of freedom							Residual standard error: 0.04615 on 239 degrees of freedom							Residual standard error: 0.02727 on 239 degrees of freedom
(92 observations deleted due to missingness)							(92 observations deleted due to missingness)							(92 observations deleted due to missingness)
Multiple R-squared: 0.6463,	Adjusted R-squared: 0.636						Multiple R-squared: 0.4843,	Adjusted R-squared: 0.4692						Multiple R-squared: 0.1314,	Adjusted R-squared: 0.1059
F-statistic: 62.39 on 7 and 239 DF, p-value: < 2.2e-16							F-statistic: 32.06 on 7 and 239 DF, p-value: < 2.2e-16							F-statistic: 5.163 on 7 and 239 DF, p-value: 1.72e-05
