# Supplementary material for: Genetic loci and metabolic states associated with murine epigenetic aging
Source: eLife. 2022 Apr 7;11:e75244. doi: 10.7554/eLife.75244 (PMC9049972; doi:10.7554/eLife.75244)
Supplement: Supplementary file 8. [file elife-75244-supp8.csv]

Supplementary file 8. Genomic regions enrichments analyses for the differentially methylated CpGs
Analysis done using the R package "rGREAT", version 3.0.0; array as background
	DM-CpG group	Database	ID	name	Hyper_Total_Regions	Hyper_Expected	Hyper_Foreground_Region_Hits	Hyper_Fold_Enrichment	Hyper_Region_Set_Coverage	Hyper_Term_Region_Coverage	Hyper_Foreground_Gene_Hits	Hyper_Background_Gene_Hits	Total_Genes_Annotated	Hyper_Raw_PValue	Hyper_Adjp_BH
1	Age-gain	GO Molecular Function	GO:0043565	sequence-specific DNA binding	7550	1357.953	1990	1.465442	0.3956262	0.2635762	291	471	714	7.75E-103	2.70E-99
2	Age-gain	GO Molecular Function	GO:0003700	sequence-specific DNA binding transcription factor activity	8584	1543.929	2178	1.410687	0.433002	0.2537279	341	565	898	2.52E-97	4.40E-94
3	Age-gain	GO Molecular Function	GO:0001071	nucleic acid binding transcription factor activity	8634	1552.922	2182	1.405093	0.4337972	0.2527218	342	566	899	1.30E-95	1.51E-92
4	Age-gain	GO Molecular Function	GO:0003677	DNA binding	12396	2229.56	2820	1.264823	0.5606362	0.2274927	518	1034	1956	3.66E-76	3.19E-73
5	Age-gain	GO Molecular Function	GO:0000976	transcription regulatory region sequence-specific DNA binding	2060	370.5142	637	1.719232	0.1266402	0.3092233	73	125	164	4.44E-50	3.10E-47
6	Age-gain	GO Molecular Function	GO:0003676	nucleic acid binding	14713	2646.299	3111	1.175604	0.6184891	0.2114457	647	1495	3325	3.09E-48	1.80E-45
7	Age-gain	GO Molecular Function	GO:0044212	transcription regulatory region DNA binding	3729	670.7026	950	1.416425	0.1888668	0.25476	135	245	347	5.42E-35	2.70E-32
8	Age-gain	GO Molecular Function	GO:0000975	regulatory region DNA binding	3737	672.1415	950	1.413393	0.1888668	0.2542146	135	248	355	1.30E-34	5.69E-32
9	Age-gain	GO Molecular Function	GO:0071837	HMG box domain binding	392	70.50561	168	2.382789	0.0333996	0.4285714	10	14	18	1.12E-30	4.36E-28
10	Age-gain	GO Molecular Function	GO:0000979	RNA polymerase II core promoter sequence-specific DNA binding	333	59.8938	145	2.420952	0.02882704	0.4354354	12	20	27	1.63E-27	5.69E-25
11	Age-gain	GO Molecular Function	GO:0001012	RNA polymerase II regulatory region DNA binding	1161	208.8189	357	1.709615	0.07097416	0.3074935	47	80	103	2.52E-27	7.98E-25
12	Age-gain	GO Molecular Function	GO:0000977	RNA polymerase II regulatory region sequence-specific DNA binding	1155	207.7398	355	1.708869	0.07057654	0.3073593	46	78	100	3.89E-27	1.13E-24
13	Age-gain	GO Molecular Function	GO:1901363	heterocyclic compound binding	17508	3149.011	3442	1.093042	0.6842942	0.1965958	871	2298	5316	1.05E-21	2.82E-19
14	Age-gain	GO Molecular Function	GO:0097159	organic cyclic compound binding	17560	3158.364	3446	1.091071	0.6850895	0.1962415	875	2320	5380	5.05E-21	1.26E-18
15	Age-gain	GO Molecular Function	GO:0001159	core promoter proximal region DNA binding	854	153.6015	263	1.712223	0.05228628	0.3079625	22	38	48	1.87E-20	4.35E-18
16	Age-gain	GO Molecular Function	GO:0001046	core promoter sequence-specific DNA binding	445	80.03826	160	1.999044	0.03180915	0.3595506	16	25	36	8.76E-20	1.91E-17
17	Age-gain	GO Molecular Function	GO:0004844	uracil DNA N-glycosylase activity	57	10.25209	40	3.901643	0.007952286	0.7017544	1	1	3	7.48E-18	1.45E-15
18	Age-gain	GO Molecular Function	GO:0017065	single-strand selective uracil DNA N-glycosylase activity	57	10.25209	40	3.901643	0.007952286	0.7017544	1	1	1	7.48E-18	1.45E-15
19	Age-gain	GO Molecular Function	GO:0000987	core promoter proximal region sequence-specific DNA binding	833	149.8244	248	1.655271	0.04930417	0.2977191	21	37	47	2.52E-17	4.62E-15
20	Age-gain	GO Molecular Function	GO:0000978	RNA polymerase II core promoter proximal region sequence-specific DNA binding	451	81.11743	151	1.861499	0.03001988	0.3348115	15	27	36	1.30E-15	2.27E-13
21	Age-gain	GO Molecular Function	GO:0000981	sequence-specific DNA binding RNA polymerase II transcription factor activity	2845	511.7053	669	1.307393	0.133002	0.2351494	103	179	263	2.43E-15	4.04E-13
22	Age-gain	GO Molecular Function	GO:0001047	core promoter binding	515	92.62855	164	1.770512	0.03260437	0.3184466	19	38	56	1.26E-14	2.00E-12
23	Age-gain	GO Molecular Function	GO:0000702	oxidized base lesion DNA N-glycosylase activity	72	12.95001	40	3.088801	0.007952286	0.5555556	1	2	2	8.71E-13	1.32E-10
24	Age-gain	GO Molecular Function	GO:0000980	RNA polymerase II distal enhancer sequence-specific DNA binding	201	36.15211	79	2.185211	0.01570577	0.3930348	11	16	19	9.25E-13	1.34E-10
25	Age-gain	GO Molecular Function	GO:0008607	phosphorylase kinase regulator activity	57	10.25209	34	3.316396	0.006759443	0.5964912	1	1	4	2.82E-12	3.93E-10
26	Age-gain	GO Molecular Function	GO:0019104	DNA N-glycosylase activity	77	13.84932	41	2.960435	0.008151093	0.5324675	2	5	11	2.95E-12	3.97E-10
27	Age-gain	GO Molecular Function	GO:0016799	hydrolase activity, hydrolyzing N-glycosyl compounds	78	14.02918	41	2.922481	0.008151093	0.525641	2	6	20	5.15E-12	6.62E-10
28	Age-gain	GO Molecular Function	GO:0001228	RNA polymerase II transcription regulatory region sequence-specific DNA binding transcription factor activity involved in positive regulation of transcription	1145	205.9411	297	1.44216	0.05904573	0.2593886	41	68	89	5.31E-12	6.62E-10
29	Age-gain	GO Molecular Function	GO:0036139	peptidyl-histidine dioxygenase activity	134	24.10141	56	2.323516	0.0111332	0.4179104	1	1	1	1.13E-10	1.31E-08
30	Age-gain	GO Molecular Function	GO:0036140	peptidyl-asparagine 3-dioxygenase activity	134	24.10141	56	2.323516	0.0111332	0.4179104	1	1	1	1.13E-10	1.31E-08
31	Age-gain	GO Molecular Function	GO:0071532	ankyrin repeat binding	137	24.64099	56	2.272636	0.0111332	0.4087591	1	2	3	3.12E-10	3.52E-08
32	Age-gain	GO Molecular Function	GO:0001078	RNA polymerase II core promoter proximal region sequence-specific DNA binding transcription factor activity involved in negative regulation of transcription	281	50.54101	91	1.800518	0.01809145	0.3238434	12	22	32	3.67E-09	4.00E-07
33	Age-gain	GO Molecular Function	GO:0000982	RNA polymerase II core promoter proximal region sequence-specific DNA binding transcription factor activity	1154	207.5599	283	1.363462	0.05626243	0.245234	41	69	94	8.17E-09	8.64E-07
34	Age-gain	GO Molecular Function	GO:0001205	RNA polymerase II distal enhancer sequence-specific DNA binding transcription factor activity involved in positive regulation of transcription	100	17.98613	42	2.335133	0.008349901	0.42	5	9	13	1.92E-08	1.97E-06
35	Age-gain	GO Molecular Function	GO:0001077	RNA polymerase II core promoter proximal region sequence-specific DNA binding transcription factor activity involved in positive regulation of transcription	982	176.6238	243	1.375806	0.04831014	0.2474542	33	52	66	4.22E-08	4.21E-06
36	Age-gain	GO Molecular Function	GO:0019904	protein domain specific binding	2135	384.0038	478	1.244779	0.09502982	0.2238876	95	241	459	4.55E-08	4.41E-06
37	Age-gain	GO Molecular Function	GO:0001158	enhancer sequence-specific DNA binding	463	83.27576	130	1.561078	0.02584493	0.2807775	17	27	32	4.88E-08	4.60E-06
38	Age-gain	GO Molecular Function	GO:0005112	Notch binding	194	34.89308	66	1.891492	0.01312127	0.3402062	6	10	12	6.10E-08	5.60E-06
39	Age-gain	GO Molecular Function	GO:0016175	superoxide-generating NADPH oxidase activity	235	42.2674	76	1.798076	0.01510934	0.3234043	3	4	7	7.27E-08	6.34E-06
40	Age-gain	GO Molecular Function	GO:0050664	oxidoreductase activity, acting on NAD(P)H, oxygen as acceptor	235	42.2674	76	1.798076	0.01510934	0.3234043	3	4	10	7.27E-08	6.34E-06
41	Age-gain	GO Molecular Function	GO:0035326	enhancer binding	474	85.25424	131	1.536581	0.02604374	0.2763713	18	29	36	1.17E-07	9.97E-06
42	Age-gain	GO Molecular Function	GO:0001105	RNA polymerase II transcription coactivator activity	348	62.59172	102	1.629609	0.02027833	0.2931034	12	19	20	1.40E-07	1.16E-05
43	Age-gain	GO Molecular Function	GO:0070742	C2H2 zinc finger domain binding	260	46.76393	81	1.732104	0.01610338	0.3115385	4	9	13	1.67E-07	1.35E-05
44	Age-gain	GO Molecular Function	GO:0005488	binding	24772	4455.523	4557	1.022776	0.9059642	0.1839577	1635	4820	11602	2.25E-07	1.79E-05
45	Age-gain	GO Molecular Function	GO:0016286	small conductance calcium-activated potassium channel activity	22	3.956948	15	3.790801	0.002982107	0.6818182	1	3	4	3.09E-07	2.40E-05
46	Age-gain	GO Molecular Function	GO:0070888	E-box binding	279	50.18129	84	1.673931	0.0166998	0.3010753	12	22	25	5.04E-07	3.82E-05
47	Age-gain	GO Molecular Function	GO:0043566	structure-specific DNA binding	711	127.8814	178	1.391915	0.03538767	0.2503516	43	90	170	1.23E-06	9.11E-05
48	Age-gain	GO Molecular Function	GO:0016651	oxidoreductase activity, acting on NAD(P)H	281	50.54101	83	1.642231	0.01650099	0.2953737	6	12	65	1.39E-06	0.000100742
49	Age-gain	GO Molecular Function	GO:0001227	RNA polymerase II transcription regulatory region sequence-specific DNA binding transcription factor activity involved in negative regulation of transcription	334	60.07366	95	1.581392	0.01888668	0.2844311	14	25	35	1.59E-06	0.000113376
50	Age-gain	GO Molecular Function	GO:0051059	NF-kappaB binding	198	35.61253	63	1.76904	0.01252485	0.3181818	3	9	18	1.69E-06	0.000117817
51	Age-gain	GO Molecular Function	GO:0001190	RNA polymerase II transcription factor binding transcription factor activity involved in positive regulation of transcription	410	73.74312	112	1.518786	0.0222664	0.2731707	18	30	34	1.72E-06	0.000117817
52	Age-gain	GO Molecular Function	GO:0051082	unfolded protein binding	198	35.61253	62	1.74096	0.01232604	0.3131313	9	17	61	3.67E-06	0.000246366
53	Age-gain	GO Molecular Function	GO:0070412	R-SMAD binding	359	64.57019	99	1.533215	0.01968191	0.275766	11	18	21	4.30E-06	0.000283113
54	Age-gain	GO Molecular Function	GO:0003705	RNA polymerase II distal enhancer sequence-specific DNA binding transcription factor activity	932	167.6307	221	1.318374	0.04393638	0.2371245	38	63	90	4.60E-06	0.000296967
55	Age-gain	GO Molecular Function	GO:0042805	actinin binding	94	16.90696	35	2.070154	0.00695825	0.3723404	4	11	18	7.82E-06	0.000496205
56	Age-gain	GO Molecular Function	GO:0019887	protein kinase regulator activity	233	41.90767	69	1.646477	0.01371769	0.2961373	16	42	93	9.32E-06	0.000580898
57	Age-gain	GO Molecular Function	GO:0051393	alpha-actinin binding	34	6.115283	17	2.77992	0.003379722	0.5	3	8	14	2.14E-05	0.001308655
58	Age-gain	GO Molecular Function	GO:0004303	estradiol 17-beta-dehydrogenase activity	27	4.856254	14	2.88288	0.0027833	0.5185185	1	2	10	6.86E-05	0.004128015
59	Age-gain	GO Molecular Function	GO:0070410	co-SMAD binding	152	27.33891	47	1.719161	0.009343936	0.3092105	6	10	10	7.33E-05	0.004333297
60	Age-gain	GO Molecular Function	GO:0019207	kinase regulator activity	253	45.5049	70	1.538296	0.0139165	0.2766798	17	49	109	9.04E-05	0.005258938
61	Age-gain	GO Molecular Function	GO:0003682	chromatin binding	2691	484.0067	556	1.148745	0.1105368	0.2066146	115	229	362	0.000100267	0.005734944
62	Age-gain	GO Molecular Function	GO:0001106	RNA polymerase II transcription corepressor activity	255	45.86462	70	1.526231	0.0139165	0.2745098	7	12	16	0.000117512	0.00661291
63	Age-gain	GO Molecular Function	GO:0019903	protein phosphatase binding	256	46.04448	70	1.520269	0.0139165	0.2734375	17	42	79	0.000133661	0.007402279
64	Age-gain	GO Molecular Function	GO:0035035	histone acetyltransferase binding	143	25.72016	44	1.71072	0.008747515	0.3076923	3	12	19	0.000138501	0.007550447
65	Age-gain	GO Molecular Function	GO:0003697	single-stranded DNA binding	174	31.29586	51	1.629609	0.01013917	0.2931034	4	18	50	0.000169037	0.009073359
66	Age-gain	GO Molecular Function	GO:0003690	double-stranded DNA binding	350	62.95144	89	1.413788	0.01769384	0.2542857	28	48	91	0.000297543	0.02
67	Age-gain	GO Molecular Function	GO:0031406	carboxylic acid binding	520	93.52786	124	1.325808	0.02465209	0.2384615	22	58	137	0.000415678	0.02
68	Age-gain	GO Molecular Function	GO:0004879	ligand-activated sequence-specific DNA binding RNA polymerase II transcription factor activity	434	78.05979	106	1.357934	0.02107356	0.2442396	17	29	41	0.000427615	0.02
69	Age-gain	GO Molecular Function	GO:0004190	aspartic-type endopeptidase activity	45	8.093757	18	2.223936	0.003578529	0.4	1	5	27	0.000445599	0.02
70	Age-gain	GO Molecular Function	GO:0070001	aspartic-type peptidase activity	45	8.093757	18	2.223936	0.003578529	0.4	1	5	28	0.000445599	0.02
71	Age-gain	GO Molecular Function	GO:0043177	organic acid binding	521	93.70772	124	1.323263	0.02465209	0.2380038	22	59	138	0.000450287	0.02
72	Age-gain	GO Molecular Function	GO:0033293	monocarboxylic acid binding	153	27.51877	44	1.598909	0.008747515	0.2875817	8	13	32	0.000706906	0.03
73	Age-gain	GO Molecular Function	GO:0031072	heat shock protein binding	202	36.33197	55	1.513818	0.01093439	0.2722772	6	15	44	0.000732299	0.03
74	Age-gain	GO Molecular Function	GO:0017095	heparan sulfate 6-O-sulfotransferase activity	11	1.978474	7	3.538081	0.00139165	0.6363636	2	2	3	0.001013778	0.05
75	Age-gain	GO Molecular Function	GO:0000404	loop DNA binding	4	0.719445	4	5.559841	0.000795229	1	1	1	2	0.001045504	0.05
76	Age-gain	GO Molecular Function	GO:0000406	double-strand/single-strand DNA junction binding	4	0.719445	4	5.559841	0.000795229	1	1	1	2	0.001045504	0.05
77	Age-gain	GO Molecular Function	GO:0019237	centromeric DNA binding	4	0.719445	4	5.559841	0.000795229	1	1	1	3	0.001045504	0.05
78	Age-gain	GO Molecular Function	GO:0032181	dinucleotide repeat insertion binding	4	0.719445	4	5.559841	0.000795229	1	1	1	2	0.001045504	0.05
79	Age-gain	GO Molecular Function	GO:0016798	hydrolase activity, acting on glycosyl bonds	179	32.19517	49	1.521968	0.009741551	0.273743	8	39	125	0.001214891	0.05
80	Age-gain	GO Molecular Function	GO:0005104	fibroblast growth factor receptor binding	80	14.3889	26	1.806948	0.005168986	0.325	8	14	22	0.001247035	0.05
81	Age-gain	GO Biological Process	GO:0007389	pattern specification process	4583	824.3042	1481	1.796667	0.2944334	0.3231508	190	311	427	7.00E-149	7.05E-145
82	Age-gain	GO Biological Process	GO:0003002	regionalization	3615	650.1985	1237	1.902496	0.2459245	0.3421853	154	238	313	1.10E-141	5.56E-138
83	Age-gain	GO Biological Process	GO:0009952	anterior/posterior pattern specification	2308	415.1198	859	2.069282	0.1707753	0.3721837	101	162	202	5.18E-117	1.74E-113
84	Age-gain	GO Biological Process	GO:0048562	embryonic organ morphogenesis	2930	526.9935	945	1.793191	0.1878728	0.3225256	131	203	276	9.97E-88	2.51E-84
85	Age-gain	GO Biological Process	GO:0009887	organ morphogenesis	5531	994.8126	1523	1.530942	0.3027833	0.2753571	254	494	755	1.81E-87	3.63E-84
86	Age-gain	GO Biological Process	GO:0048598	embryonic morphogenesis	4571	822.1458	1297	1.577579	0.2578529	0.2837454	208	360	530	4.06E-81	6.82E-78
87	Age-gain	GO Biological Process	GO:0048568	embryonic organ development	3573	642.6443	1070	1.664996	0.2127237	0.2994682	167	288	418	3.96E-79	5.70E-76
88	Age-gain	GO Biological Process	GO:0001501	skeletal system development	3038	546.4185	931	1.703822	0.1850895	0.3064516	147	258	367	3.23E-73	4.06E-70
89	Age-gain	GO Biological Process	GO:0048706	embryonic skeletal system development	1477	265.6551	541	2.036475	0.1075547	0.366283	71	101	120	9.68E-69	1.08E-65
90	Age-gain	GO Biological Process	GO:0009653	anatomical structure morphogenesis	9675	1740.158	2268	1.30333	0.4508946	0.2344186	467	1012	1740	3.38E-65	3.40E-62
91	Age-gain	GO Biological Process	GO:0048731	system development	14347	2580.469	3122	1.209857	0.6206759	0.2176065	711	1660	3113	1.29E-64	1.18E-61
92	Age-gain	GO Biological Process	GO:0009790	embryo development	6376	1146.795	1615	1.408272	0.3210736	0.2532936	298	591	981	7.28E-64	6.11E-61
93	Age-gain	GO Biological Process	GO:0048513	organ development	11728	2109.413	2636	1.249637	0.5240557	0.2247613	561	1246	2334	1.74E-61	1.35E-58
94	Age-gain	GO Biological Process	GO:0045165	cell fate commitment	2872	516.5615	856	1.657111	0.1701789	0.2980501	126	175	220	1.27E-60	9.16E-58
95	Age-gain	GO Biological Process	GO:0048856	anatomical structure development	15211	2735.87	3231	1.180977	0.6423459	0.2124121	780	1872	3631	5.26E-55	3.53E-52
96	Age-gain	GO Biological Process	GO:0007275	multicellular organismal development	15651	2815.009	3305	1.174064	0.6570577	0.2111686	792	1894	3663	2.00E-54	1.26E-51
97	Age-gain	GO Biological Process	GO:0007399	nervous system development	9901	1780.806	2261	1.26965	0.449503	0.2283608	450	922	1503	5.78E-54	3.42E-51
98	Age-gain	GO Biological Process	GO:0048705	skeletal system morphogenesis	1749	314.5773	572	1.818313	0.1137177	0.327044	84	144	197	2.33E-53	1.30E-50
99	Age-gain	GO Biological Process	GO:0044767	single-organism developmental process	13889	2498.093	2988	1.196112	0.5940358	0.2151343	710	1687	3221	5.62E-53	2.98E-50
100	Age-gain	GO Biological Process	GO:0044707	single-multicellular organism process	17126	3080.304	3551	1.152808	0.7059642	0.2073456	911	2255	5677	8.47E-53	4.26E-50
101	Age-gain	GO Biological Process	GO:0007417	central nervous system development	5823	1047.332	1458	1.392109	0.2898608	0.2503864	239	437	652	9.32E-53	4.47E-50
102	Age-gain	GO Biological Process	GO:0006355	regulation of transcription, DNA-dependent	14754	2653.673	3139	1.182889	0.6240557	0.2127559	689	1478	2959	1.71E-52	7.47E-50
103	Age-gain	GO Biological Process	GO:2001141	regulation of RNA biosynthetic process	14754	2653.673	3139	1.182889	0.6240557	0.2127559	689	1478	2962	1.71E-52	7.47E-50
104	Age-gain	GO Biological Process	GO:0032501	multicellular organismal process	17280	3108.003	3575	1.150256	0.7107356	0.2068866	923	2308	6118	2.50E-52	1.05E-49
105	Age-gain	GO Biological Process	GO:0032502	developmental process	16361	2942.71	3413	1.159815	0.6785288	0.2086058	852	2071	4098	2.94E-51	1.19E-48
106	Age-gain	GO Biological Process	GO:0051252	regulation of RNA metabolic process	15188	2731.733	3207	1.17398	0.6375746	0.2111535	714	1534	3033	8.87E-51	3.43E-48
107	Age-gain	GO Biological Process	GO:0048704	embryonic skeletal system morphogenesis	1086	195.3293	398	2.037584	0.07912525	0.3664825	53	72	88	2.82E-50	1.05E-47
108	Age-gain	GO Biological Process	GO:0007420	brain development	4580	823.7646	1184	1.437304	0.2353877	0.2585153	185	345	514	2.19E-48	7.87E-46
109	Age-gain	GO Biological Process	GO:0009792	embryo development ending in birth or egg hatching	4317	776.4611	1118	1.439866	0.2222664	0.2589761	192	377	623	1.16E-45	4.02E-43
110	Age-gain	GO Biological Process	GO:2000112	regulation of cellular macromolecule biosynthetic process	15249	2742.704	3192	1.163815	0.6345924	0.2093252	720	1613	3210	1.33E-45	4.46E-43
111	Age-gain	GO Biological Process	GO:0006357	regulation of transcription from RNA polymerase II promoter	9071	1631.521	2062	1.263851	0.4099404	0.2273178	393	745	1233	2.17E-45	7.04E-43
112	Age-gain	GO Biological Process	GO:0010556	regulation of macromolecule biosynthetic process	15291	2750.259	3198	1.1628	0.6357853	0.2091426	725	1634	3272	2.46E-45	7.73E-43
113	Age-gain	GO Biological Process	GO:0051171	regulation of nitrogen compound metabolic process	16246	2922.026	3361	1.150229	0.6681909	0.2068817	786	1780	3555	1.11E-44	3.40E-42
114	Age-gain	GO Biological Process	GO:0019219	regulation of nucleobase-containing compound metabolic process	16177	2909.616	3347	1.150324	0.6654076	0.2068987	780	1766	3520	2.81E-44	8.33E-42
115	Age-gain	GO Biological Process	GO:0009889	regulation of biosynthetic process	15447	2778.317	3217	1.157895	0.6395626	0.2082605	741	1694	3418	1.01E-43	2.89E-41
116	Age-gain	GO Biological Process	GO:0030154	cell differentiation	12414	2232.798	2675	1.198049	0.5318091	0.2154825	609	1344	2495	1.27E-43	3.56E-41
117	Age-gain	GO Biological Process	GO:0010468	regulation of gene expression	15872	2854.758	3290	1.152462	0.6540755	0.2072833	770	1732	3434	1.70E-43	4.63E-41
118	Age-gain	GO Biological Process	GO:0031326	regulation of cellular biosynthetic process	15408	2771.302	3208	1.157579	0.6377734	0.2082035	736	1678	3388	2.62E-43	6.94E-41
119	Age-gain	GO Biological Process	GO:0043009	chordate embryonic development	4284	770.5256	1101	1.428895	0.2188867	0.2570028	191	375	616	3.38E-43	8.72E-41
120	Age-gain	GO Biological Process	GO:0048869	cellular developmental process	12562	2259.417	2695	1.192785	0.5357853	0.2145359	621	1391	2634	2.48E-42	6.23E-40
121	Age-gain	GO Biological Process	GO:0048663	neuron fate commitment	1091	196.2286	379	1.93142	0.07534791	0.3473877	52	65	68	1.24E-41	3.04E-39
122	Age-gain	GO Biological Process	GO:0030182	neuron differentiation	5594	1006.144	1362	1.353683	0.2707753	0.2434752	261	480	703	1.98E-41	4.75E-39
123	Age-gain	GO Biological Process	GO:0001708	cell fate specification	1234	221.9488	414	1.865295	0.08230616	0.3354943	44	59	69	2.66E-41	6.22E-39
124	Age-gain	GO Biological Process	GO:0010628	positive regulation of gene expression	7840	1410.112	1804	1.279331	0.3586481	0.230102	357	681	1098	3.87E-41	8.87E-39
125	Age-gain	GO Biological Process	GO:0045893	positive regulation of transcription, DNA-dependent	7577	1362.809	1752	1.28558	0.3483101	0.2312261	335	630	1002	6.04E-41	1.35E-38
126	Age-gain	GO Biological Process	GO:0009953	dorsal/ventral pattern formation	1033	185.7967	361	1.942984	0.07176938	0.3494676	48	69	93	2.68E-40	5.86E-38
127	Age-gain	GO Biological Process	GO:0001763	morphogenesis of a branching structure	1605	288.6773	501	1.735502	0.09960239	0.3121495	72	132	191	2.85E-40	6.11E-38
128	Age-gain	GO Biological Process	GO:0022008	neurogenesis	7811	1404.896	1791	1.274827	0.3560636	0.229292	341	675	1065	1.05E-39	2.20E-37
129	Age-gain	GO Biological Process	GO:0051254	positive regulation of RNA metabolic process	7794	1401.839	1787	1.274754	0.3552684	0.2292789	342	650	1035	1.44E-39	2.95E-37
130	Age-gain	GO Biological Process	GO:0006351	transcription, DNA-dependent	12089	2174.343	2593	1.192544	0.515507	0.2144925	503	1050	1853	1.87E-39	3.77E-37
131	Age-gain	GO Biological Process	GO:0032774	RNA biosynthetic process	12093	2175.062	2593	1.19215	0.515507	0.2144216	504	1055	1864	2.53E-39	5.00E-37
132	Age-gain	GO Biological Process	GO:0045944	positive regulation of transcription from RNA polymerase II promoter	5920	1064.779	1410	1.324219	0.2803181	0.2381757	263	468	729	8.65E-38	1.67E-35
133	Age-gain	GO Biological Process	GO:0010557	positive regulation of macromolecule biosynthetic process	7781	1399.5	1772	1.266166	0.3522863	0.2277342	347	693	1147	3.30E-37	6.28E-35
134	Age-gain	GO Biological Process	GO:0061138	morphogenesis of a branching epithelium	1550	278.785	478	1.714583	0.09502982	0.3083871	69	127	183	6.64E-37	1.24E-34
135	Age-gain	GO Biological Process	GO:0030878	thyroid gland development	215	38.67017	120	3.103167	0.02385686	0.5581395	11	14	19	9.35E-36	1.71E-33
136	Age-gain	GO Biological Process	GO:0045935	positive regulation of nucleobase-containing compound metabolic process	8003	1439.43	1806	1.254664	0.3590457	0.2256654	352	702	1150	1.34E-35	2.42E-33
137	Age-gain	GO Biological Process	GO:0051173	positive regulation of nitrogen compound metabolic process	8031	1444.466	1811	1.253751	0.3600398	0.2255012	354	708	1172	1.57E-35	2.78E-33
138	Age-gain	GO Biological Process	GO:0048665	neuron fate specification	716	128.7807	266	2.065528	0.0528827	0.3715084	27	33	33	7.62E-35	1.32E-32
139	Age-gain	GO Biological Process	GO:0031328	positive regulation of cellular biosynthetic process	7870	1415.508	1776	1.254673	0.3530815	0.2256671	352	718	1224	8.41E-35	1.43E-32
140	Age-gain	GO Biological Process	GO:0009891	positive regulation of biosynthetic process	7900	1420.904	1781	1.253427	0.3540755	0.225443	356	731	1245	1.16E-34	1.94E-32
141	Age-gain	GO Biological Process	GO:0002009	morphogenesis of an epithelium	2838	510.4463	759	1.486934	0.1508946	0.2674419	125	251	385	1.38E-34	2.28E-32
142	Age-gain	GO Biological Process	GO:0034654	nucleobase-containing compound biosynthetic process	12502	2248.625	2635	1.171827	0.5238569	0.2107663	527	1137	2082	9.43E-34	1.53E-31
143	Age-gain	GO Biological Process	GO:0051216	cartilage development	1367	245.8703	425	1.728553	0.08449304	0.3108998	59	109	148	1.16E-33	1.86E-31
144	Age-gain	GO Biological Process	GO:0019438	aromatic compound biosynthetic process	12574	2261.575	2647	1.170423	0.5262425	0.2105138	536	1164	2153	1.42E-33	2.23E-31
145	Age-gain	GO Biological Process	GO:0048699	generation of neurons	7320	1316.584	1662	1.262357	0.3304175	0.2270492	323	641	994	2.10E-33	3.25E-31
146	Age-gain	GO Biological Process	GO:0031323	regulation of cellular metabolic process	17472	3142.536	3511	1.117251	0.6980119	0.2009501	884	2169	4421	2.37E-33	3.62E-31
147	Age-gain	GO Biological Process	GO:0080090	regulation of primary metabolic process	17404	3130.305	3499	1.117782	0.6956262	0.2010457	874	2137	4394	2.69E-33	4.05E-31
148	Age-gain	GO Biological Process	GO:1901362	organic cyclic compound biosynthetic process	12762	2295.389	2679	1.167122	0.5326044	0.2099201	546	1202	2260	3.12E-33	4.60E-31
149	Age-gain	GO Biological Process	GO:0061448	connective tissue development	1530	275.1877	462	1.678854	0.09184891	0.3019608	69	130	189	3.15E-33	4.60E-31
150	Age-gain	GO Biological Process	GO:0018130	heterocycle biosynthetic process	12586	2263.734	2647	1.169307	0.5262425	0.210313	536	1167	2153	3.22E-33	4.63E-31
151	Age-gain	GO Biological Process	GO:0044271	cellular nitrogen compound biosynthetic process	12621	2270.029	2653	1.168708	0.5274354	0.2102052	541	1181	2190	3.67E-33	5.21E-31
152	Age-gain	GO Biological Process	GO:0048729	tissue morphogenesis	3372	606.4922	866	1.427883	0.172167	0.2568209	150	316	492	6.35E-33	8.87E-31
153	Age-gain	GO Biological Process	GO:2000027	regulation of organ morphogenesis	1385	249.1078	427	1.714117	0.08489066	0.3083032	57	103	143	6.55E-33	9.03E-31
154	Age-gain	GO Biological Process	GO:0060255	regulation of macromolecule metabolic process	16859	3032.281	3401	1.121598	0.6761431	0.201732	841	2038	4168	1.30E-32	1.77E-30
155	Age-gain	GO Biological Process	GO:0060764	cell-cell signaling involved in mammary gland development	53	9.532647	49	5.14023	0.009741551	0.9245283	2	2	2	3.48E-32	4.67E-30
156	Age-gain	GO Biological Process	GO:0042471	ear morphogenesis	1235	222.1287	389	1.751237	0.07733598	0.3149798	57	87	120	4.00E-32	5.29E-30
157	Age-gain	GO Biological Process	GO:0060480	lung goblet cell differentiation	54	9.712508	49	5.045041	0.009741551	0.9074074	2	2	3	3.10E-31	4.05E-29
158	Age-gain	GO Biological Process	GO:0048732	gland development	2178	391.7378	601	1.534189	0.1194831	0.2759412	89	176	261	5.49E-31	7.09E-29
159	Age-gain	GO Biological Process	GO:0034645	cellular macromolecule biosynthetic process	13168	2368.413	2738	1.156048	0.544334	0.2079283	579	1360	2686	6.29E-31	8.02E-29
160	Age-gain	GO Biological Process	GO:0009059	macromolecule biosynthetic process	13180	2370.571	2740	1.155839	0.5447316	0.2078907	581	1368	2708	6.68E-31	8.40E-29
161	Age-gain	GO Biological Process	GO:0060574	intestinal epithelial cell maturation	53	9.532647	48	5.035328	0.009542744	0.9056604	1	2	3	1.58E-30	1.96E-28
162	Age-gain	GO Biological Process	GO:0060442	branching involved in prostate gland morphogenesis	175	31.47572	99	3.145281	0.01968191	0.5657143	8	12	13	2.18E-30	2.68E-28
163	Age-gain	GO Biological Process	GO:0060482	lobar bronchus development	58	10.43195	50	4.792966	0.009940358	0.862069	3	3	4	1.88E-29	2.28E-27
164	Age-gain	GO Biological Process	GO:0016070	RNA metabolic process	13275	2387.658	2745	1.149662	0.5457256	0.2067797	580	1315	2461	4.98E-29	5.97E-27
165	Age-gain	GO Biological Process	GO:0060527	prostate epithelial cord arborization involved in prostate glandular acinus morphogenesis	144	25.90002	86	3.320461	0.01709742	0.5972222	5	6	7	6.28E-29	7.43E-27
166	Age-gain	GO Biological Process	GO:0060435	bronchiole development	55	9.892369	48	4.852225	0.009542744	0.8727273	1	3	3	7.59E-29	8.88E-27
167	Age-gain	GO Biological Process	GO:0010870	positive regulation of receptor biosynthetic process	57	10.25209	49	4.779512	0.009741551	0.8596491	2	4	6	9.10E-29	1.05E-26
168	Age-gain	GO Biological Process	GO:0060173	limb development	1695	304.8648	485	1.590869	0.09642147	0.2861357	82	118	161	9.30E-29	1.06E-26
169	Age-gain	GO Biological Process	GO:2000026	regulation of multicellular organismal development	7153	1286.548	1602	1.245193	0.3184891	0.223962	306	688	1196	1.28E-28	1.45E-26
170	Age-gain	GO Biological Process	GO:0042472	inner ear morphogenesis	1004	180.5807	323	1.788674	0.06421471	0.3217131	46	69	100	1.51E-28	1.69E-26
171	Age-gain	GO Biological Process	GO:0060429	epithelium development	5047	907.7598	1187	1.307615	0.2359841	0.2351892	215	446	792	2.30E-28	2.55E-26
172	Age-gain	GO Biological Process	GO:0031128	developmental induction	481	86.51327	188	2.173077	0.03737575	0.3908524	21	29	33	4.71E-28	5.15E-26
173	Age-gain	GO Biological Process	GO:0030326	embryonic limb morphogenesis	1371	246.5898	408	1.65457	0.08111332	0.297593	67	95	128	6.52E-28	7.06E-26
174	Age-gain	GO Biological Process	GO:0019222	regulation of metabolic process	18009	3239.121	3568	1.101533	0.7093439	0.1981232	937	2349	4941	1.55E-27	1.66E-25
175	Age-gain	GO Biological Process	GO:0003016	respiratory system process	67	12.0507	53	4.398083	0.01053678	0.7910448	4	7	11	1.72E-27	1.82E-25
176	Age-gain	GO Biological Process	GO:0002069	columnar/cuboidal epithelial cell maturation	57	10.25209	48	4.681971	0.009542744	0.8421053	1	3	4	2.29E-27	2.40E-25
177	Age-gain	GO Biological Process	GO:0060687	regulation of branching involved in prostate gland morphogenesis	158	28.41808	89	3.131809	0.01769384	0.5632911	5	7	7	2.83E-27	2.93E-25
178	Age-gain	GO Biological Process	GO:0010604	positive regulation of macromolecule metabolic process	9314	1675.228	2004	1.196255	0.3984095	0.21516	435	962	1717	3.84E-27	3.94E-25
179	Age-gain	GO Biological Process	GO:0021569	rhombomere 3 development	43	7.734034	40	5.171945	0.007952286	0.9302326	3	3	4	9.64E-27	9.80E-25
180	Age-gain	GO Biological Process	GO:0009888	tissue development	7678	1380.975	1691	1.224497	0.3361829	0.2202396	330	735	1351	1.10E-26	1.11E-24
181	Age-gain	GO Biological Process	GO:0042733	embryonic digit morphogenesis	539	96.94522	200	2.063021	0.03976143	0.3710575	30	40	57	2.27E-26	2.27E-24
182	Age-gain	GO Biological Process	GO:0002064	epithelial cell development	1141	205.2217	349	1.7006	0.0693837	0.305872	53	121	239	2.88E-26	2.84E-24
183	Age-gain	GO Biological Process	GO:0035108	limb morphogenesis	1562	280.9433	446	1.587509	0.08866799	0.2855314	76	110	149	3.09E-26	3.02E-24
184	Age-gain	GO Biological Process	GO:0045168	cell-cell signaling involved in cell fate commitment	499	89.75077	189	2.105832	0.03757455	0.3787575	22	30	34	3.13E-26	3.03E-24
185	Age-gain	GO Biological Process	GO:0060688	regulation of morphogenesis of a branching structure	664	119.4279	232	1.942595	0.04612326	0.3493976	22	41	55	3.91E-26	3.75E-24
186	Age-gain	GO Biological Process	GO:0090304	nucleic acid metabolic process	14101	2536.224	2873	1.132787	0.571173	0.2037444	632	1508	3028	4.92E-26	4.68E-24
187	Age-gain	GO Biological Process	GO:0031325	positive regulation of cellular metabolic process	9194	1653.644	1974	1.193727	0.3924453	0.2147052	425	954	1741	5.11E-26	4.81E-24
188	Age-gain	GO Biological Process	GO:0060284	regulation of cell development	4481	805.9583	1060	1.315205	0.2107356	0.2365543	169	359	535	6.88E-26	6.38E-24
189	Age-gain	GO Biological Process	GO:0060525	prostate glandular acinus development	172	30.93614	92	2.973868	0.01829026	0.5348837	7	10	12	6.90E-26	6.38E-24
190	Age-gain	GO Biological Process	GO:0016477	cell migration	3057	549.8359	768	1.39678	0.1526839	0.2512267	142	297	508	7.22E-26	6.61E-24
191	Age-gain	GO Biological Process	GO:0010467	gene expression	13523	2432.264	2768	1.138034	0.5502982	0.2046883	596	1405	2799	7.69E-26	6.97E-24
192	Age-gain	GO Biological Process	GO:0060602	branch elongation of an epithelium	207	37.23128	103	2.766491	0.02047714	0.4975845	10	13	17	1.73E-25	1.55E-23
193	Age-gain	GO Biological Process	GO:0060433	bronchus development	73	13.12987	54	4.112759	0.01073559	0.739726	4	5	7	1.90E-25	1.70E-23
194	Age-gain	GO Biological Process	GO:0001709	cell fate determination	909	163.4939	291	1.779883	0.05785288	0.320132	27	31	35	2.05E-25	1.81E-23
195	Age-gain	GO Biological Process	GO:0030900	forebrain development	3154	567.2824	785	1.38379	0.1560636	0.2488903	118	213	301	3.46E-25	3.03E-23
196	Age-gain	GO Biological Process	GO:0060535	trachea cartilage morphogenesis	63	11.33126	49	4.324321	0.009741551	0.7777778	2	3	4	6.50E-25	5.64E-23
197	Age-gain	GO Biological Process	GO:0021953	central nervous system neuron differentiation	2379	427.8899	620	1.448971	0.1232604	0.2606137	91	131	161	7.26E-25	6.25E-23
198	Age-gain	GO Biological Process	GO:0043583	ear development	1753	315.2968	483	1.53189	0.09602386	0.2755277	85	146	203	1.11E-24	9.45E-23
199	Age-gain	GO Biological Process	GO:0035270	endocrine system development	1342	241.3738	390	1.615751	0.07753479	0.290611	58	94	126	1.54E-24	1.31E-22
200	Age-gain	GO Biological Process	GO:0042127	regulation of cell proliferation	5232	941.0341	1202	1.277318	0.2389662	0.2297401	237	560	1047	1.68E-24	1.41E-22
201	Age-gain	GO Biological Process	GO:0009893	positive regulation of metabolic process	9507	1709.941	2021	1.181912	0.4017893	0.2125802	451	1019	1858	2.57E-24	2.14E-22
202	Age-gain	GO Biological Process	GO:1901576	organic substance biosynthetic process	14094	2534.965	2859	1.127826	0.5683897	0.2028523	653	1622	3435	3.09E-24	2.55E-22
203	Age-gain	GO Biological Process	GO:0048754	branching morphogenesis of an epithelial tube	1393	250.5467	400	1.596509	0.07952286	0.28715	60	112	158	4.53E-24	3.71E-22
204	Age-gain	GO Biological Process	GO:0048870	cell motility	3200	575.556	789	1.370848	0.1568588	0.2465625	151	325	573	4.71E-24	3.82E-22
205	Age-gain	GO Biological Process	GO:0001759	organ induction	180	32.37503	92	2.841696	0.01829026	0.5111111	10	16	19	5.36E-24	4.32E-22
206	Age-gain	GO Biological Process	GO:0060485	mesenchyme development	1469	264.2162	416	1.574468	0.08270378	0.2831858	58	104	137	9.79E-24	7.82E-22
207	Age-gain	GO Biological Process	GO:0060534	trachea cartilage development	66	11.87084	49	4.127761	0.009741551	0.7424242	2	4	5	2.46E-23	1.95E-21
208	Age-gain	GO Biological Process	GO:0044249	cellular biosynthetic process	14084	2533.166	2850	1.125074	0.5666004	0.2023573	648	1600	3369	2.99E-23	2.36E-21
209	Age-gain	GO Biological Process	GO:0007267	cell-cell signaling	2347	422.1344	606	1.435562	0.1204771	0.258202	142	275	448	3.07E-23	2.39E-21
210	Age-gain	GO Biological Process	GO:0060571	morphogenesis of an epithelial fold	207	37.23128	99	2.659054	0.01968191	0.4782609	6	12	20	6.70E-23	5.19E-21
211	Age-gain	GO Biological Process	GO:0060562	epithelial tube morphogenesis	2489	447.6747	634	1.416207	0.1260437	0.2547208	105	203	302	9.20E-23	7.07E-21
212	Age-gain	GO Biological Process	GO:0021877	forebrain neuron fate commitment	192	34.53336	94	2.722005	0.01868787	0.4895833	9	10	10	9.75E-23	7.44E-21
213	Age-gain	GO Biological Process	GO:0030539	male genitalia development	259	46.58407	114	2.447189	0.02266402	0.4401544	8	18	22	2.15E-22	1.63E-20
214	Age-gain	GO Biological Process	GO:0002066	columnar/cuboidal epithelial cell development	310	55.75699	128	2.295676	0.02544732	0.4129032	10	16	25	5.90E-22	4.43E-20
215	Age-gain	GO Biological Process	GO:0060425	lung morphogenesis	343	61.69241	137	2.220694	0.02723658	0.3994169	17	26	39	8.27E-22	6.17E-20
216	Age-gain	GO Biological Process	GO:0051960	regulation of nervous system development	4035	725.7402	947	1.304875	0.1882704	0.2346964	151	318	483	1.00E-21	7.42E-20
217	Age-gain	GO Biological Process	GO:0045647	negative regulation of erythrocyte differentiation	100	17.98613	61	3.391503	0.01212724	0.61	5	7	8	1.30E-21	9.58E-20
218	Age-gain	GO Biological Process	GO:0023019	signal transduction involved in regulation of gene expression	185	33.27433	90	2.704787	0.01789264	0.4864865	12	16	19	1.37E-21	9.97E-20
219	Age-gain	GO Biological Process	GO:0021871	forebrain regionalization	565	101.6216	195	1.918883	0.0387674	0.3451327	21	24	24	1.88E-21	1.36E-19
220	Age-gain	GO Biological Process	GO:0021510	spinal cord development	1321	237.5967	374	1.574096	0.07435388	0.2831188	50	65	84	2.24E-21	1.61E-19
221	Age-gain	GO Biological Process	GO:0060441	epithelial tube branching involved in lung morphogenesis	235	42.2674	105	2.484184	0.02087475	0.4468085	11	16	24	2.41E-21	1.72E-19
222	Age-gain	GO Biological Process	GO:0022603	regulation of anatomical structure morphogenesis	3450	620.5213	826	1.331139	0.1642147	0.2394203	159	356	609	2.76E-21	1.96E-19
223	Age-gain	GO Biological Process	GO:0048522	positive regulation of cellular process	12589	2264.273	2565	1.132814	0.5099404	0.2037493	608	1486	2897	3.43E-21	2.42E-19
224	Age-gain	GO Biological Process	GO:0003401	axis elongation	243	43.70629	107	2.44816	0.02127237	0.4403292	13	20	27	4.01E-21	2.80E-19
225	Age-gain	GO Biological Process	GO:0009058	biosynthetic process	14315	2574.714	2874	1.116241	0.5713718	0.2007684	657	1641	3507	5.69E-21	3.95E-19
226	Age-gain	GO Biological Process	GO:0002070	epithelial cell maturation	89	16.00765	56	3.498327	0.0111332	0.6292135	4	7	14	6.88E-21	4.71E-19
227	Age-gain	GO Biological Process	GO:0021546	rhombomere development	89	16.00765	56	3.498327	0.0111332	0.6292135	6	7	8	6.88E-21	4.71E-19
228	Age-gain	GO Biological Process	GO:0022612	gland morphogenesis	845	151.9828	262	1.72388	0.05208748	0.3100592	38	74	107	7.98E-21	5.43E-19
229	Age-gain	GO Biological Process	GO:0048839	inner ear development	1514	272.3099	415	1.523999	0.08250497	0.2741083	72	123	176	8.21E-21	5.55E-19
230	Age-gain	GO Biological Process	GO:0009954	proximal/distal pattern formation	593	106.6577	200	1.875157	0.03976143	0.3372681	25	30	32	1.19E-20	7.98E-19
231	Age-gain	GO Biological Process	GO:0060850	regulation of transcription involved in cell fate commitment	468	84.17507	168	1.99584	0.0333996	0.3589744	11	13	14	1.27E-20	8.45E-19
232	Age-gain	GO Biological Process	GO:0060439	trachea morphogenesis	90	16.18751	56	3.459457	0.0111332	0.6222222	5	7	8	1.50E-20	9.95E-19
233	Age-gain	GO Biological Process	GO:0040011	locomotion	4155	747.3235	964	1.289937	0.1916501	0.2320096	194	420	766	1.65E-20	1.09E-18
234	Age-gain	GO Biological Process	GO:0006928	cellular component movement	4580	823.7646	1048	1.272208	0.2083499	0.228821	211	478	850	2.15E-20	1.41E-18
235	Age-gain	GO Biological Process	GO:0021872	forebrain generation of neurons	885	159.1772	270	1.696223	0.05367793	0.3050847	32	48	57	2.40E-20	1.56E-18
236	Age-gain	GO Biological Process	GO:0051239	regulation of multicellular organismal process	9041	1626.126	1904	1.170881	0.3785288	0.2105962	425	1004	1913	3.14E-20	2.03E-18
237	Age-gain	GO Biological Process	GO:0060575	intestinal epithelial cell differentiation	86	15.46807	54	3.491063	0.01073559	0.627907	5	9	15	3.92E-20	2.52E-18
238	Age-gain	GO Biological Process	GO:0035239	tube morphogenesis	2592	466.2004	642	1.37709	0.1276342	0.2476852	111	213	316	6.25E-20	3.99E-18
239	Age-gain	GO Biological Process	GO:0060576	intestinal epithelial cell development	79	14.20904	51	3.589264	0.01013917	0.6455696	3	6	10	7.10E-20	4.50E-18
240	Age-gain	GO Biological Process	GO:0050793	regulation of developmental process	8476	1524.504	1794	1.176776	0.35666	0.2116564	371	869	1543	1.04E-19	6.56E-18
241	Age-gain	GO Biological Process	GO:0048468	cell development	6421	1154.889	1402	1.213969	0.2787276	0.2183461	319	704	1180	1.45E-19	9.06E-18
242	Age-gain	GO Biological Process	GO:0003310	pancreatic A cell differentiation	124	22.3028	67	3.004108	0.01332008	0.5403226	4	4	5	1.46E-19	9.06E-18
243	Age-gain	GO Biological Process	GO:0048518	positive regulation of biological process	13406	2411.22	2699	1.11935	0.5365805	0.2013278	665	1632	3270	1.77E-19	1.09E-17
244	Age-gain	GO Biological Process	GO:0021879	forebrain neuron differentiation	797	143.3494	246	1.716086	0.04890656	0.3086575	28	38	45	2.42E-19	1.49E-17
245	Age-gain	GO Biological Process	GO:0035115	embryonic forelimb morphogenesis	458	82.37646	162	1.966581	0.03220676	0.3537118	20	27	33	3.26E-19	1.99E-17
246	Age-gain	GO Biological Process	GO:0006139	nucleobase-containing compound metabolic process	15016	2700.797	2984	1.104859	0.5932406	0.1987214	702	1747	3671	4.22E-19	2.56E-17
247	Age-gain	GO Biological Process	GO:0051093	negative regulation of developmental process	4145	745.5249	951	1.275611	0.1890656	0.2294331	176	340	581	1.06E-18	6.38E-17
248	Age-gain	GO Biological Process	GO:0007423	sensory organ development	3610	649.2991	843	1.298323	0.1675944	0.233518	161	316	485	1.44E-18	8.64E-17
249	Age-gain	GO Biological Process	GO:0048486	parasympathetic nervous system development	222	39.9292	96	2.404256	0.01908549	0.4324324	10	14	16	1.91E-18	1.13E-16
250	Age-gain	GO Biological Process	GO:0046483	heterocycle metabolic process	15159	2726.517	3004	1.101772	0.5972167	0.1981661	713	1793	3802	1.91E-18	1.13E-16
251	Age-gain	GO Biological Process	GO:0050767	regulation of neurogenesis	3611	649.479	842	1.296424	0.1673956	0.2331764	136	285	425	2.29E-18	1.35E-16
252	Age-gain	GO Biological Process	GO:0051094	positive regulation of developmental process	4519	812.793	1023	1.258623	0.2033797	0.2263775	193	420	714	2.35E-18	1.38E-16
253	Age-gain	GO Biological Process	GO:0006725	cellular aromatic compound metabolic process	15227	2738.747	3015	1.100868	0.5994036	0.1980035	715	1803	3829	2.57E-18	1.50E-16
254	Age-gain	GO Biological Process	GO:0060484	lung-associated mesenchyme development	103	18.52571	58	3.130784	0.01153082	0.5631068	7	9	11	2.86E-18	1.65E-16
255	Age-gain	GO Biological Process	GO:0035136	forelimb morphogenesis	659	118.5286	209	1.763288	0.0415507	0.3171472	26	34	40	4.72E-18	2.72E-16
256	Age-gain	GO Biological Process	GO:0034641	cellular nitrogen compound metabolic process	15170	2728.495	3002	1.10024	0.5968191	0.1978906	720	1824	3909	5.67E-18	3.24E-16
257	Age-gain	GO Biological Process	GO:0021602	cranial nerve morphogenesis	440	79.13895	154	1.945944	0.0306163	0.35	11	18	20	7.52E-18	4.28E-16
258	Age-gain	GO Biological Process	GO:0021797	forebrain anterior/posterior pattern specification	254	45.68476	104	2.27647	0.02067594	0.4094488	6	7	7	8.46E-18	4.79E-16
259	Age-gain	GO Biological Process	GO:0060512	prostate gland morphogenesis	316	56.83616	121	2.128926	0.02405567	0.3829114	15	24	27	1.03E-17	5.77E-16
260	Age-gain	GO Biological Process	GO:0060740	prostate gland epithelium morphogenesis	316	56.83616	121	2.128926	0.02405567	0.3829114	15	24	26	1.03E-17	5.77E-16
261	Age-gain	GO Biological Process	GO:0045595	regulation of cell differentiation	7025	1263.525	1504	1.19032	0.299006	0.2140925	290	648	1090	1.04E-17	5.78E-16
262	Age-gain	GO Biological Process	GO:0048483	autonomic nervous system development	517	92.98827	173	1.86045	0.03439364	0.3346228	26	36	45	1.17E-17	6.48E-16
263	Age-gain	GO Biological Process	GO:0048532	anatomical structure arrangement	324	58.27505	123	2.11068	0.02445328	0.3796296	4	9	12	1.23E-17	6.77E-16
264	Age-gain	GO Biological Process	GO:0021545	cranial nerve development	728	130.939	224	1.71072	0.0445328	0.3076923	23	34	41	1.52E-17	8.32E-16
265	Age-gain	GO Biological Process	GO:0060272	embryonic skeletal joint morphogenesis	196	35.25281	86	2.439522	0.01709742	0.4387755	9	10	12	3.78E-17	2.05E-15
266	Age-gain	GO Biological Process	GO:0021761	limbic system development	914	164.3932	266	1.618072	0.0528827	0.2910284	35	49	74	4.19E-17	2.27E-15
267	Age-gain	GO Biological Process	GO:0021798	forebrain dorsal/ventral pattern formation	160	28.7778	75	2.606175	0.01491054	0.46875	6	6	6	4.35E-17	2.34E-15
268	Age-gain	GO Biological Process	GO:1901360	organic cyclic compound metabolic process	15468	2782.094	3047	1.095218	0.6057654	0.1969873	729	1868	4011	4.75E-17	2.54E-15
269	Age-gain	GO Biological Process	GO:0021515	cell differentiation in spinal cord	859	154.5008	253	1.637532	0.05029821	0.2945285	37	43	54	5.13E-17	2.73E-15
270	Age-gain	GO Biological Process	GO:0003156	regulation of organ formation	293	52.69935	113	2.144239	0.02246521	0.3856655	16	29	33	6.65E-17	3.52E-15
271	Age-gain	GO Biological Process	GO:0021700	developmental maturation	946	170.1488	272	1.598601	0.05407555	0.2875264	49	105	183	9.99E-17	5.26E-15
272	Age-gain	GO Biological Process	GO:0060638	mesenchymal-epithelial cell signaling	93	16.7271	52	3.108728	0.01033797	0.5591398	2	9	9	2.36E-16	1.24E-14
273	Age-gain	GO Biological Process	GO:0021766	hippocampus development	706	126.982	215	1.693153	0.04274354	0.3045326	27	37	54	2.40E-16	1.25E-14
274	Age-gain	GO Biological Process	GO:0045746	negative regulation of Notch signaling pathway	229	41.18823	94	2.282205	0.01868787	0.4104803	7	14	18	2.59E-16	1.35E-14
275	Age-gain	GO Biological Process	GO:0001656	metanephros development	1130	203.2432	311	1.530186	0.06182903	0.2752212	37	63	80	4.57E-16	2.36E-14
276	Age-gain	GO Biological Process	GO:0031076	embryonic camera-type eye development	626	112.5931	195	1.731899	0.0387674	0.3115016	15	28	39	4.90E-16	2.51E-14
277	Age-gain	GO Biological Process	GO:0060216	definitive hemopoiesis	186	33.45419	81	2.421221	0.01610338	0.4354839	11	16	16	5.23E-16	2.67E-14
278	Age-gain	GO Biological Process	GO:0060438	trachea development	109	19.60488	57	2.90744	0.01133201	0.5229358	6	10	15	5.25E-16	2.67E-14
279	Age-gain	GO Biological Process	GO:0045664	regulation of neuron differentiation	2994	538.5046	703	1.305467	0.1397614	0.2348029	111	225	333	5.72E-16	2.89E-14
280	Age-gain	GO Biological Process	GO:0021783	preganglionic parasympathetic nervous system development	163	29.31739	74	2.5241	0.01471173	0.4539877	8	11	13	6.18E-16	3.10E-14
281	Age-gain	GO Biological Process	GO:0048935	peripheral nervous system neuron development	163	29.31739	74	2.5241	0.01471173	0.4539877	7	7	9	6.18E-16	3.10E-14
282	Age-gain	GO Biological Process	GO:0021543	pallium development	1426	256.4822	375	1.46209	0.07455268	0.2629734	53	83	118	8.04E-16	4.01E-14
283	Age-gain	GO Biological Process	GO:0030850	prostate gland development	360	64.75005	128	1.976832	0.02544732	0.3555556	18	31	39	1.13E-15	5.58E-14
284	Age-gain	GO Biological Process	GO:0072498	embryonic skeletal joint development	217	39.02989	89	2.280303	0.01769384	0.4101382	11	12	14	1.70E-15	8.37E-14
285	Age-gain	GO Biological Process	GO:0021537	telencephalon development	2137	384.3635	524	1.363293	0.104175	0.2452036	78	130	180	1.96E-15	9.61E-14
286	Age-gain	GO Biological Process	GO:0045665	negative regulation of neuron differentiation	963	173.2064	271	1.564607	0.05387674	0.2814123	32	45	57	2.10E-15	1.03E-13
287	Age-gain	GO Biological Process	GO:0000122	negative regulation of transcription from RNA polymerase II promoter	4827	868.1903	1063	1.224386	0.211332	0.2202196	182	337	538	2.21E-15	1.07E-13
288	Age-gain	GO Biological Process	GO:0010869	regulation of receptor biosynthetic process	100	17.98613	53	2.946716	0.01053678	0.53	4	9	12	2.62E-15	1.27E-13
289	Age-gain	GO Biological Process	GO:0006807	nitrogen compound metabolic process	15505	2788.749	3038	1.089377	0.6039761	0.1959368	750	1951	4240	2.65E-15	1.28E-13
290	Age-gain	GO Biological Process	GO:0048596	embryonic camera-type eye morphogenesis	580	104.3195	180	1.725468	0.03578529	0.3103448	13	23	28	9.73E-15	4.67E-13
291	Age-gain	GO Biological Process	GO:0021568	rhombomere 2 development	26	4.676393	23	4.918321	0.004572565	0.8846154	2	2	2	1.04E-14	4.94E-13
292	Age-gain	GO Biological Process	GO:0031016	pancreas development	868	156.1196	246	1.575715	0.04890656	0.2834101	35	54	77	1.82E-14	8.65E-13
293	Age-gain	GO Biological Process	GO:0001710	mesodermal cell fate commitment	276	49.64171	103	2.074868	0.02047714	0.3731884	4	8	13	1.94E-14	9.16E-13
294	Age-gain	GO Biological Process	GO:0048048	embryonic eye morphogenesis	601	108.0966	184	1.702181	0.03658052	0.3061564	15	27	33	2.04E-14	9.58E-13
295	Age-gain	GO Biological Process	GO:0046546	development of primary male sexual characteristics	640	115.1112	193	1.67664	0.03836978	0.3015625	34	70	116	2.37E-14	1.11E-12
296	Age-gain	GO Biological Process	GO:0000904	cell morphogenesis involved in differentiation	3054	549.2963	705	1.28346	0.140159	0.2308448	135	276	407	2.52E-14	1.17E-12
297	Age-gain	GO Biological Process	GO:0060536	cartilage morphogenesis	183	32.91461	77	2.339387	0.01530815	0.420765	6	8	10	2.59E-14	1.20E-12
298	Age-gain	GO Biological Process	GO:0021915	neural tube development	1491	268.1731	382	1.424453	0.07594433	0.2562039	56	98	148	2.77E-14	1.28E-12
299	Age-gain	GO Biological Process	GO:0007501	mesodermal cell fate specification	263	47.30351	99	2.092868	0.01968191	0.3764259	3	5	6	3.29E-14	1.51E-12
300	Age-gain	GO Biological Process	GO:0021658	rhombomere 3 morphogenesis	18	3.237503	18	5.559841	0.003578529	1	1	1	2	3.78E-14	1.73E-12
301	Age-gain	GO Biological Process	GO:0021603	cranial nerve formation	283	50.90074	104	2.043192	0.02067594	0.3674912	3	3	3	4.63E-14	2.11E-12
302	Age-gain	GO Biological Process	GO:0060351	cartilage development involved in endochondral bone morphogenesis	164	29.49725	71	2.407004	0.01411531	0.4329268	9	16	22	4.66E-14	2.11E-12
303	Age-gain	GO Biological Process	GO:0001658	branching involved in ureteric bud morphogenesis	726	130.5793	212	1.623535	0.04214712	0.292011	26	38	48	4.81E-14	2.17E-12
304	Age-gain	GO Biological Process	GO:0021675	nerve development	840	151.0835	238	1.575288	0.0473161	0.2833333	30	52	67	5.06E-14	2.27E-12
305	Age-gain	GO Biological Process	GO:0046661	male sex differentiation	655	117.8091	195	1.65522	0.0387674	0.2977099	37	74	123	6.82E-14	3.05E-12
306	Age-gain	GO Biological Process	GO:0021610	facial nerve morphogenesis	66	11.87084	39	3.285361	0.007753479	0.5909091	3	5	6	1.09E-13	4.86E-12
307	Age-gain	GO Biological Process	GO:0030902	hindbrain development	1330	239.2155	344	1.438034	0.06838966	0.2586466	59	96	123	1.52E-13	6.74E-12
308	Age-gain	GO Biological Process	GO:0045597	positive regulation of cell differentiation	3698	665.1269	825	1.240365	0.1640159	0.2230936	149	321	510	4.18E-13	1.85E-11
309	Age-gain	GO Biological Process	GO:0021520	spinal cord motor neuron cell fate specification	284	51.0806	102	1.996844	0.02027833	0.3591549	10	14	14	4.25E-13	1.87E-11
310	Age-gain	GO Biological Process	GO:0048333	mesodermal cell differentiation	319	57.37574	111	1.934616	0.02206759	0.3479624	7	12	18	4.47E-13	1.96E-11
311	Age-gain	GO Biological Process	GO:0060675	ureteric bud morphogenesis	834	150.0043	233	1.553289	0.04632207	0.2793765	31	46	57	4.66E-13	2.03E-11
312	Age-gain	GO Biological Process	GO:0030855	epithelial cell differentiation	3053	549.1164	696	1.267491	0.1383698	0.2279725	134	265	491	5.60E-13	2.43E-11
313	Age-gain	GO Biological Process	GO:0060348	bone development	907	163.1342	249	1.526351	0.04950298	0.2745314	41	73	115	5.72E-13	2.47E-11
314	Age-gain	GO Biological Process	GO:0008593	regulation of Notch signaling pathway	396	71.22506	130	1.8252	0.02584493	0.3282828	18	33	44	6.17E-13	2.65E-11
315	Age-gain	GO Biological Process	GO:0072006	nephron development	917	164.9328	251	1.521832	0.0499006	0.2737186	31	59	88	6.52E-13	2.79E-11
316	Age-gain	GO Biological Process	GO:0048646	anatomical structure formation involved in morphogenesis	4145	745.5249	911	1.221958	0.1811133	0.2197829	201	454	772	7.36E-13	3.14E-11
317	Age-gain	GO Biological Process	GO:0021561	facial nerve development	69	12.41043	39	3.142519	0.007753479	0.5652174	3	6	7	7.94E-13	3.37E-11
318	Age-gain	GO Biological Process	GO:0002072	optic cup morphogenesis involved in camera-type eye development	287	51.62018	102	1.975971	0.02027833	0.3554007	3	4	7	8.96E-13	3.79E-11
319	Age-gain	GO Biological Process	GO:0021604	cranial nerve structural organization	269	48.38268	97	2.00485	0.01928429	0.3605948	3	6	7	1.20E-12	5.07E-11
320	Age-gain	GO Biological Process	GO:0060041	retina development in camera-type eye	1091	196.2286	288	1.467676	0.05725646	0.263978	32	75	117	1.33E-12	5.57E-11
321	Age-gain	GO Biological Process	GO:0060579	ventral spinal cord interneuron fate commitment	259	46.58407	94	2.017857	0.01868787	0.3629344	10	13	13	1.74E-12	7.25E-11
322	Age-gain	GO Biological Process	GO:0048666	neuron development	3598	647.1408	800	1.236207	0.1590457	0.2223457	171	354	539	2.22E-12	9.25E-11
323	Age-gain	GO Biological Process	GO:0060749	mammary gland alveolus development	137	24.64099	60	2.434967	0.01192843	0.4379562	6	16	23	2.28E-12	9.43E-11
324	Age-gain	GO Biological Process	GO:0072210	metanephric nephron development	600	107.9168	177	1.640153	0.03518887	0.295	19	29	34	2.32E-12	9.58E-11
325	Age-gain	GO Biological Process	GO:0021978	telencephalon regionalization	265	47.66323	95	1.993151	0.01888668	0.3584906	11	11	11	3.02E-12	1.24E-10
326	Age-gain	GO Biological Process	GO:0001764	neuron migration	1224	220.1502	315	1.430841	0.06262425	0.2573529	47	80	112	3.26E-12	1.33E-10
327	Age-gain	GO Biological Process	GO:0060349	bone morphogenesis	676	121.5862	194	1.595576	0.03856859	0.2869822	30	49	75	3.26E-12	1.33E-10
328	Age-gain	GO Biological Process	GO:0021511	spinal cord patterning	281	50.54101	99	1.958805	0.01968191	0.3523132	13	18	23	3.49E-12	1.42E-10
329	Age-gain	GO Biological Process	GO:0050794	regulation of cellular process	21669	3897.414	4078	1.046335	0.8107356	0.1881951	1273	3505	9070	4.61E-12	1.86E-10
330	Age-gain	GO Biological Process	GO:0048863	stem cell differentiation	2169	390.1191	511	1.309856	0.1015905	0.2355924	99	179	249	5.73E-12	2.31E-10
331	Age-gain	GO Biological Process	GO:0048708	astrocyte differentiation	211	37.95073	80	2.107997	0.01590457	0.3791469	10	13	23	5.95E-12	2.39E-10
332	Age-gain	GO Biological Process	GO:0021903	rostrocaudal neural tube patterning	226	40.64864	84	2.06649	0.0166998	0.3716814	8	11	13	6.11E-12	2.44E-10
333	Age-gain	GO Biological Process	GO:0021513	spinal cord dorsal/ventral patterning	268	48.20282	95	1.970839	0.01888668	0.3544776	11	16	21	6.34E-12	2.52E-10
334	Age-gain	GO Biological Process	GO:0071331	cellular response to hexose stimulus	284	51.0806	99	1.938114	0.01968191	0.3485915	6	9	26	7.12E-12	2.81E-10
335	Age-gain	GO Biological Process	GO:0071333	cellular response to glucose stimulus	284	51.0806	99	1.938114	0.01968191	0.3485915	6	9	24	7.12E-12	2.81E-10
336	Age-gain	GO Biological Process	GO:0001655	urogenital system development	2394	430.5879	556	1.291258	0.1105368	0.2322473	94	188	284	7.57E-12	2.98E-10
337	Age-gain	GO Biological Process	GO:0045765	regulation of angiogenesis	502	90.29035	152	1.683458	0.03021869	0.3027888	32	73	150	9.59E-12	3.76E-10
338	Age-gain	GO Biological Process	GO:0030216	keratinocyte differentiation	283	50.90074	98	1.925316	0.0194831	0.3462898	17	30	75	1.40E-11	5.47E-10
339	Age-gain	GO Biological Process	GO:0035883	enteroendocrine cell differentiation	245	44.06601	88	1.997004	0.01749503	0.3591837	10	12	16	1.67E-11	6.48E-10
340	Age-gain	GO Biological Process	GO:0008284	positive regulation of cell proliferation	3136	564.0449	702	1.244582	0.1395626	0.223852	151	330	585	1.82E-11	7.05E-10
341	Age-gain	GO Biological Process	GO:0042481	regulation of odontogenesis	300	53.95838	102	1.890346	0.02027833	0.34	12	17	23	1.87E-11	7.20E-10
342	Age-gain	GO Biological Process	GO:0071322	cellular response to carbohydrate stimulus	293	52.69935	100	1.897557	0.01988072	0.3412969	7	12	30	2.28E-11	8.76E-10
343	Age-gain	GO Biological Process	GO:0044699	single-organism process	23019	4140.226	4299	1.038349	0.854672	0.1867588	1479	4267	11383	2.29E-11	8.76E-10
344	Age-gain	GO Biological Process	GO:0045666	positive regulation of neuron differentiation	901	162.055	241	1.487149	0.04791252	0.2674806	33	47	66	2.36E-11	9.00E-10
345	Age-gain	GO Biological Process	GO:0072017	distal tubule development	382	68.707	122	1.775656	0.02425447	0.3193717	4	9	12	2.44E-11	9.29E-10
346	Age-gain	GO Biological Process	GO:0072172	mesonephric tubule formation	262	47.12365	92	1.952311	0.01829026	0.351145	4	5	5	2.46E-11	9.30E-10
347	Age-gain	GO Biological Process	GO:0060231	mesenchymal to epithelial transition	346	62.232	113	1.815786	0.02246521	0.3265896	10	13	13	2.81E-11	1.06E-09
348	Age-gain	GO Biological Process	GO:0072044	collecting duct development	314	56.47644	105	1.859182	0.02087475	0.3343949	4	8	11	2.93E-11	1.10E-09
349	Age-gain	GO Biological Process	GO:0048762	mesenchymal cell differentiation	1199	215.6537	305	1.414305	0.06063618	0.2543786	44	83	109	3.05E-11	1.14E-09
350	Age-gain	GO Biological Process	GO:0040007	growth	1927	346.5926	457	1.318551	0.09085487	0.2371562	98	205	354	3.16E-11	1.18E-09
351	Age-gain	GO Biological Process	GO:0021902	commitment of neuronal cell to specific neuron type in forebrain	107	19.24515	49	2.546095	0.009741551	0.4579439	4	4	4	3.24E-11	1.20E-09
352	Age-gain	GO Biological Process	GO:0048854	brain morphogenesis	467	83.99521	142	1.690573	0.02823062	0.3040685	12	20	31	3.28E-11	1.22E-09
353	Age-gain	GO Biological Process	GO:0021570	rhombomere 4 development	32	5.75556	23	3.996136	0.004572565	0.71875	2	3	3	3.62E-11	1.33E-09
354	Age-gain	GO Biological Process	GO:0021612	facial nerve structural organization	32	5.75556	23	3.996136	0.004572565	0.71875	2	3	4	3.62E-11	1.33E-09
355	Age-gain	GO Biological Process	GO:0072074	kidney mesenchyme development	315	56.6563	105	1.85328	0.02087475	0.3333333	8	15	16	3.62E-11	1.33E-09
356	Age-gain	GO Biological Process	GO:0021532	neural tube patterning	398	71.58478	125	1.746181	0.02485089	0.3140704	19	26	39	4.82E-11	1.76E-09
357	Age-gain	GO Biological Process	GO:0002067	glandular epithelial cell differentiation	321	57.73546	106	1.83596	0.02107356	0.3302181	16	22	28	5.50E-11	2.00E-09
358	Age-gain	GO Biological Process	GO:0031018	endocrine pancreas development	449	80.75771	137	1.696433	0.02723658	0.3051225	23	33	48	5.57E-11	2.02E-09
359	Age-gain	GO Biological Process	GO:0072171	mesonephric tubule morphogenesis	266	47.8431	92	1.922953	0.01829026	0.3458647	4	6	6	6.29E-11	2.27E-09
360	Age-gain	GO Biological Process	GO:0045646	regulation of erythrocyte differentiation	216	38.85003	79	2.03346	0.01570577	0.3657407	11	23	33	6.43E-11	2.31E-09
361	Age-gain	GO Biological Process	GO:0003326	pancreatic A cell fate commitment	35	6.295144	24	3.812462	0.004771372	0.6857143	2	2	2	6.60E-11	2.35E-09
362	Age-gain	GO Biological Process	GO:0003329	pancreatic PP cell fate commitment	35	6.295144	24	3.812462	0.004771372	0.6857143	2	2	2	6.60E-11	2.35E-09
363	Age-gain	GO Biological Process	GO:0016331	morphogenesis of embryonic epithelium	1306	234.8988	326	1.387832	0.06481113	0.2496172	54	94	139	6.77E-11	2.41E-09
364	Age-gain	GO Biological Process	GO:2000378	negative regulation of reactive oxygen species metabolic process	314	56.47644	104	1.841476	0.02067594	0.3312102	5	7	13	6.83E-11	2.42E-09
365	Age-gain	GO Biological Process	GO:0048469	cell maturation	571	102.7008	165	1.606609	0.03280318	0.2889667	33	68	123	7.60E-11	2.68E-09
366	Age-gain	GO Biological Process	GO:0048286	lung alveolus development	275	49.46185	94	1.900455	0.01868787	0.3418182	9	22	43	8.15E-11	2.87E-09
367	Age-gain	GO Biological Process	GO:1901342	regulation of vasculature development	537	96.5855	157	1.625503	0.03121272	0.292365	34	83	165	8.44E-11	2.96E-09
368	Age-gain	GO Biological Process	GO:0021913	regulation of transcription from RNA polymerase II promoter involved in ventral spinal cord interneuron specification	151	27.15905	61	2.246028	0.01212724	0.4039735	4	5	5	9.19E-11	3.21E-09
369	Age-gain	GO Biological Process	GO:0021884	forebrain neuron development	113	20.32432	50	2.460107	0.009940358	0.4424779	7	11	16	9.54E-11	3.32E-09
370	Age-gain	GO Biological Process	GO:0001678	cellular glucose homeostasis	296	53.23893	99	1.859541	0.01968191	0.3344595	6	14	35	1.05E-10	3.64E-09
371	Age-gain	GO Biological Process	GO:0042474	middle ear morphogenesis	245	44.06601	86	1.951618	0.01709742	0.3510204	13	22	24	1.10E-10	3.82E-09
372	Age-gain	GO Biological Process	GO:0036138	peptidyl-histidine hydroxylation	134	24.10141	56	2.323516	0.0111332	0.4179104	1	1	1	1.13E-10	3.88E-09
373	Age-gain	GO Biological Process	GO:0042265	peptidyl-asparagine hydroxylation	134	24.10141	56	2.323516	0.0111332	0.4179104	1	1	1	1.13E-10	3.88E-09
374	Age-gain	GO Biological Process	GO:0003382	epithelial cell morphogenesis	428	76.98062	131	1.701727	0.02604374	0.3060748	14	24	36	1.16E-10	3.97E-09
375	Age-gain	GO Biological Process	GO:0030879	mammary gland development	883	158.8175	234	1.473389	0.04652087	0.2650057	38	75	120	1.20E-10	4.09E-09
376	Age-gain	GO Biological Process	GO:0008347	glial cell migration	46	8.273618	28	3.384251	0.0055666	0.6086957	4	6	12	1.21E-10	4.10E-09
377	Age-gain	GO Biological Process	GO:0065007	biological regulation	22235	3999.215	4160	1.040204	0.8270378	0.1870924	1365	3806	10007	1.68E-10	5.70E-09
378	Age-gain	GO Biological Process	GO:2000241	regulation of reproductive process	380	68.34728	119	1.741108	0.02365805	0.3131579	19	39	68	1.70E-10	5.75E-09
379	Age-gain	GO Biological Process	GO:0003322	pancreatic A cell development	85	15.28821	41	2.681806	0.008151093	0.4823529	1	1	1	1.74E-10	5.84E-09
380	Age-gain	GO Biological Process	GO:0021905	forebrain-midbrain boundary formation	85	15.28821	41	2.681806	0.008151093	0.4823529	2	2	2	1.74E-10	5.84E-09
381	Age-gain	GO Biological Process	GO:0021918	regulation of transcription from RNA polymerase II promoter involved in somatic motor neuron fate commitment	85	15.28821	41	2.681806	0.008151093	0.4823529	2	2	2	1.74E-10	5.84E-09
382	Age-gain	GO Biological Process	GO:0001838	embryonic epithelial tube formation	1208	217.2724	303	1.394563	0.06023857	0.2508278	45	79	115	1.87E-10	6.24E-09
383	Age-gain	GO Biological Process	GO:0042264	peptidyl-aspartic acid hydroxylation	136	24.46113	56	2.289346	0.0111332	0.4117647	1	2	2	2.24E-10	7.43E-09
384	Age-gain	GO Biological Process	GO:0072175	epithelial tube formation	1215	218.5314	304	1.391104	0.06043738	0.2502058	46	80	116	2.33E-10	7.71E-09
385	Age-gain	GO Biological Process	GO:0003337	mesenchymal to epithelial transition involved in metanephros morphogenesis	308	55.39727	101	1.823195	0.02007952	0.3279221	7	9	9	2.40E-10	7.93E-09
386	Age-gain	GO Biological Process	GO:0021542	dentate gyrus development	300	53.95838	99	1.834748	0.01968191	0.33	8	11	13	2.44E-10	8.01E-09
387	Age-gain	GO Biological Process	GO:0050789	regulation of biological process	21941	3946.336	4108	1.040966	0.8166998	0.1872294	1317	3659	9610	2.93E-10	9.61E-09
388	Age-gain	GO Biological Process	GO:0048593	camera-type eye morphogenesis	1208	217.2724	302	1.38996	0.06003976	0.25	35	70	99	2.94E-10	9.61E-09
389	Age-gain	GO Biological Process	GO:0072221	metanephric distal convoluted tubule development	290	52.15977	96	1.840499	0.01908549	0.3310345	3	3	5	3.74E-10	1.22E-08
390	Age-gain	GO Biological Process	GO:0035284	brain segmentation	45	8.093757	27	3.335905	0.005367793	0.6	2	2	3	4.12E-10	1.34E-08
391	Age-gain	GO Biological Process	GO:0072079	nephron tubule formation	381	68.52714	118	1.721945	0.02345924	0.3097113	10	12	14	4.31E-10	1.40E-08
392	Age-gain	GO Biological Process	GO:0090184	positive regulation of kidney development	291	52.33963	96	1.834174	0.01908549	0.3298969	6	8	10	4.61E-10	1.49E-08
393	Age-gain	GO Biological Process	GO:0060795	cell fate commitment involved in formation of primary germ layer	394	70.86534	121	1.707464	0.02405567	0.3071066	10	16	24	4.65E-10	1.50E-08
394	Age-gain	GO Biological Process	GO:0048485	sympathetic nervous system development	369	66.3688	115	1.732742	0.02286282	0.3116531	15	20	23	4.73E-10	1.52E-08
395	Age-gain	GO Biological Process	GO:0072080	nephron tubule development	664	119.4279	183	1.532306	0.03638171	0.2756024	18	27	37	4.97E-10	1.59E-08
396	Age-gain	GO Biological Process	GO:0021522	spinal cord motor neuron differentiation	611	109.8952	171	1.556028	0.03399602	0.2798691	23	29	37	5.24E-10	1.67E-08
397	Age-gain	GO Biological Process	GO:0072235	metanephric distal tubule development	292	52.51949	96	1.827893	0.01908549	0.3287671	3	5	7	5.66E-10	1.80E-08
398	Age-gain	GO Biological Process	GO:0002118	aggressive behavior	30	5.395838	21	3.891889	0.00417495	0.7	1	1	9	5.78E-10	1.83E-08
399	Age-gain	GO Biological Process	GO:0021764	amygdala development	30	5.395838	21	3.891889	0.00417495	0.7	1	1	1	5.78E-10	1.83E-08
400	Age-gain	GO Biological Process	GO:0003404	optic vesicle morphogenesis	43	7.734034	26	3.361764	0.005168986	0.6046512	1	1	1	6.85E-10	2.13E-08
401	Age-gain	GO Biological Process	GO:0003409	optic cup structural organization	43	7.734034	26	3.361764	0.005168986	0.6046512	1	1	1	6.85E-10	2.13E-08
402	Age-gain	GO Biological Process	GO:0070172	positive regulation of tooth mineralization	43	7.734034	26	3.361764	0.005168986	0.6046512	1	1	2	6.85E-10	2.13E-08
403	Age-gain	GO Biological Process	GO:0071281	cellular response to iron ion	43	7.734034	26	3.361764	0.005168986	0.6046512	1	1	2	6.85E-10	2.13E-08
404	Age-gain	GO Biological Process	GO:0043066	negative regulation of apoptotic process	2118	380.9461	487	1.278396	0.09681909	0.2299339	108	259	493	7.97E-10	2.48E-08
405	Age-gain	GO Biological Process	GO:0061303	cornea development in camera-type eye	46	8.273618	27	3.263385	0.005367793	0.5869565	2	3	6	8.25E-10	2.56E-08
406	Age-gain	GO Biological Process	GO:0072073	kidney epithelium development	827	148.7453	218	1.465593	0.04333996	0.2636034	28	43	66	8.56E-10	2.64E-08
407	Age-gain	GO Biological Process	GO:0090191	negative regulation of branching involved in ureteric bud morphogenesis	38	6.834728	24	3.511478	0.004771372	0.6315789	3	3	4	8.70E-10	2.67E-08
408	Age-gain	GO Biological Process	GO:0021796	cerebral cortex regionalization	211	37.95073	75	1.976247	0.01491054	0.3554502	7	7	7	8.72E-10	2.67E-08
409	Age-gain	GO Biological Process	GO:0072179	nephric duct formation	258	46.40421	87	1.87483	0.01729622	0.3372093	4	5	5	8.74E-10	2.67E-08
410	Age-gain	GO Biological Process	GO:0010720	positive regulation of cell development	1378	247.8488	335	1.35163	0.0666004	0.243106	49	112	163	9.39E-10	2.87E-08
411	Age-gain	GO Biological Process	GO:0060900	embryonic camera-type eye formation	390	70.14589	119	1.696464	0.02365805	0.3051282	5	8	11	9.94E-10	3.02E-08
412	Age-gain	GO Biological Process	GO:2001053	regulation of mesenchymal cell apoptotic process	295	53.05907	96	1.809304	0.01908549	0.3254237	7	13	13	1.04E-09	3.16E-08
413	Age-gain	GO Biological Process	GO:0033599	regulation of mammary gland epithelial cell proliferation	159	28.59794	61	2.133021	0.01212724	0.3836478	5	9	13	1.07E-09	3.23E-08
414	Age-gain	GO Biological Process	GO:0021882	regulation of transcription from RNA polymerase II promoter involved in forebrain neuron fate commitment	41	7.374312	25	3.390147	0.004970179	0.6097561	2	2	2	1.14E-09	3.41E-08
415	Age-gain	GO Biological Process	GO:0021893	cerebral cortex GABAergic interneuron fate commitment	41	7.374312	25	3.390147	0.004970179	0.6097561	2	2	2	1.14E-09	3.41E-08
416	Age-gain	GO Biological Process	GO:0090183	regulation of kidney development	490	88.13202	142	1.611219	0.02823062	0.2897959	17	31	47	1.27E-09	3.81E-08
417	Age-gain	GO Biological Process	GO:0090103	cochlea morphogenesis	333	59.8938	105	1.753103	0.02087475	0.3153153	8	17	21	1.29E-09	3.86E-08
418	Age-gain	GO Biological Process	GO:0048645	organ formation	565	101.6216	159	1.564628	0.03161034	0.2814159	18	24	28	1.37E-09	4.09E-08
419	Age-gain	GO Biological Process	GO:0021506	anterior neuropore closure	44	7.913895	26	3.285361	0.005168986	0.5909091	1	2	2	1.39E-09	4.11E-08
420	Age-gain	GO Biological Process	GO:2000377	regulation of reactive oxygen species metabolic process	350	62.95144	109	1.731493	0.02166998	0.3114286	9	21	52	1.39E-09	4.11E-08
421	Age-gain	GO Biological Process	GO:0043069	negative regulation of programmed cell death	2158	388.1406	493	1.270158	0.09801193	0.2284523	111	265	504	1.61E-09	4.74E-08
422	Age-gain	GO Biological Process	GO:0090189	regulation of branching involved in ureteric bud morphogenesis	406	73.02367	122	1.670691	0.02425447	0.3004926	11	17	24	1.73E-09	5.09E-08
423	Age-gain	GO Biological Process	GO:0048701	embryonic cranial skeleton morphogenesis	502	90.29035	144	1.594855	0.02862823	0.2868526	25	31	38	2.06E-09	6.05E-08
424	Age-gain	GO Biological Process	GO:0050678	regulation of epithelial cell proliferation	1822	327.7072	424	1.293838	0.08429423	0.2327113	68	127	208	2.31E-09	6.75E-08
425	Age-gain	GO Biological Process	GO:0021898	commitment of multipotent stem cells to neuronal lineage in forebrain	42	7.554173	25	3.309429	0.004970179	0.5952381	2	3	3	2.32E-09	6.78E-08
426	Age-gain	GO Biological Process	GO:0002065	columnar/cuboidal epithelial cell differentiation	795	142.9897	209	1.461644	0.0415507	0.2628931	35	53	74	2.43E-09	7.07E-08
427	Age-gain	GO Biological Process	GO:0003309	type B pancreatic cell differentiation	231	41.54795	79	1.901417	0.01570577	0.3419913	9	11	15	2.46E-09	7.14E-08
428	Age-gain	GO Biological Process	GO:0071711	basement membrane organization	45	8.093757	26	3.212353	0.005168986	0.5777778	1	2	8	2.72E-09	7.87E-08
429	Age-gain	GO Biological Process	GO:0006284	base-excision repair	212	38.13059	74	1.940699	0.01471173	0.3490566	5	15	29	2.82E-09	8.13E-08
430	Age-gain	GO Biological Process	GO:0061326	renal tubule development	678	121.9459	183	1.500665	0.03638171	0.2699115	18	30	40	2.88E-09	8.26E-08
431	Age-gain	GO Biological Process	GO:0072075	metanephric mesenchyme development	292	52.51949	94	1.789812	0.01868787	0.3219178	6	13	13	2.88E-09	8.26E-08
432	Age-gain	GO Biological Process	GO:0072197	ureter morphogenesis	236	42.44726	80	1.884692	0.01590457	0.3389831	3	3	4	3.11E-09	8.89E-08
433	Age-gain	GO Biological Process	GO:0035799	ureter maturation	244	43.88615	82	1.868471	0.01630219	0.3360656	2	4	4	3.14E-09	8.97E-08
434	Age-gain	GO Biological Process	GO:0045596	negative regulation of cell differentiation	3312	595.7005	719	1.206982	0.1429423	0.2170894	143	276	458	3.40E-09	9.67E-08
435	Age-gain	GO Biological Process	GO:0090190	positive regulation of branching involved in ureteric bud morphogenesis	389	69.96603	117	1.67224	0.02326044	0.3007712	9	15	21	3.48E-09	9.86E-08
436	Age-gain	GO Biological Process	GO:0072009	nephron epithelium development	799	143.7091	209	1.454326	0.0415507	0.261577	24	37	47	3.79E-09	1.07E-07
437	Age-gain	GO Biological Process	GO:0018196	peptidyl-asparagine modification	145	26.07988	56	2.147249	0.0111332	0.3862069	1	9	12	3.81E-09	1.07E-07
438	Age-gain	GO Biological Process	GO:0048592	eye morphogenesis	1381	248.3884	332	1.336616	0.06600398	0.2404055	46	97	134	4.08E-09	1.15E-07
439	Age-gain	GO Biological Process	GO:0040034	regulation of development, heterochronic	210	37.77086	73	1.932707	0.01451292	0.347619	7	7	13	4.40E-09	1.23E-07
440	Age-gain	GO Biological Process	GO:0048505	regulation of timing of cell differentiation	210	37.77086	73	1.932707	0.01451292	0.347619	7	7	12	4.40E-09	1.23E-07
441	Age-gain	GO Biological Process	GO:0048714	positive regulation of oligodendrocyte differentiation	73	13.12987	35	2.665677	0.00695825	0.4794521	7	9	11	4.53E-09	1.26E-07
442	Age-gain	GO Biological Process	GO:0061564	axon development	2154	387.4212	489	1.262192	0.0972167	0.2270195	101	191	267	4.63E-09	1.29E-07
443	Age-gain	GO Biological Process	GO:0032808	lacrimal gland development	110	19.78474	46	2.325024	0.009145129	0.4181818	4	5	5	4.88E-09	1.35E-07
444	Age-gain	GO Biological Process	GO:0007409	axonogenesis	2135	384.0038	485	1.263008	0.09642147	0.2271663	99	185	255	4.93E-09	1.36E-07
445	Age-gain	GO Biological Process	GO:0042063	gliogenesis	1263	227.1648	307	1.351442	0.0610338	0.2430721	49	84	131	4.93E-09	1.36E-07
446	Age-gain	GO Biological Process	GO:0010039	response to iron ion	49	8.813202	27	3.063586	0.005367793	0.5510204	2	6	15	5.61E-09	1.54E-07
447	Age-gain	GO Biological Process	GO:0060021	palate development	892	160.4362	228	1.421125	0.04532803	0.2556054	36	63	80	6.44E-09	1.77E-07
448	Age-gain	GO Biological Process	GO:0072078	nephron tubule morphogenesis	410	73.74312	121	1.640831	0.02405567	0.295122	12	18	21	6.51E-09	1.78E-07
449	Age-gain	GO Biological Process	GO:0061428	negative regulation of transcription from RNA polymerase II promoter in response to hypoxia	147	26.43961	56	2.118035	0.0111332	0.3809524	1	2	2	6.80E-09	1.86E-07
450	Age-gain	GO Biological Process	GO:0008582	regulation of synaptic growth at neuromuscular junction	23	4.136809	17	4.109448	0.003379722	0.7391304	2	2	4	7.01E-09	1.91E-07
451	Age-gain	GO Biological Process	GO:0072205	metanephric collecting duct development	236	42.44726	79	1.861133	0.01570577	0.3347458	3	5	7	7.38E-09	2.00E-07
452	Age-gain	GO Biological Process	GO:0021895	cerebral cortex neuron differentiation	322	57.91533	100	1.726659	0.01988072	0.310559	11	18	19	7.64E-09	2.07E-07
453	Age-gain	GO Biological Process	GO:0007626	locomotory behavior	1144	205.7613	281	1.36566	0.05586481	0.2456294	53	112	191	7.84E-09	2.12E-07
454	Age-gain	GO Biological Process	GO:0010719	negative regulation of epithelial to mesenchymal transition	101	18.16599	43	2.367061	0.008548708	0.4257426	7	9	11	8.00E-09	2.15E-07
455	Age-gain	GO Biological Process	GO:0042593	glucose homeostasis	565	101.6216	156	1.535107	0.03101392	0.2761062	20	55	118	8.14E-09	2.19E-07
456	Age-gain	GO Biological Process	GO:0051240	positive regulation of multicellular organismal process	2199	395.5149	496	1.254061	0.09860835	0.2255571	108	262	509	8.87E-09	2.37E-07
457	Age-gain	GO Biological Process	GO:0001823	mesonephros development	425	76.44104	124	1.622165	0.02465209	0.2917647	13	20	21	8.96E-09	2.39E-07
458	Age-gain	GO Biological Process	GO:0021562	vestibulocochlear nerve development	245	44.06601	81	1.838151	0.01610338	0.3306122	2	2	4	9.09E-09	2.42E-07
459	Age-gain	GO Biological Process	GO:0014031	mesenchymal cell development	835	150.1842	215	1.431576	0.04274354	0.257485	39	72	96	9.22E-09	2.45E-07
460	Age-gain	GO Biological Process	GO:0030198	extracellular matrix organization	361	64.92991	109	1.678733	0.02166998	0.3019391	24	74	160	9.31E-09	2.46E-07
461	Age-gain	GO Biological Process	GO:0043062	extracellular structure organization	361	64.92991	109	1.678733	0.02166998	0.3019391	24	74	161	9.31E-09	2.46E-07
462	Age-gain	GO Biological Process	GO:0035295	tube development	3692	664.0478	789	1.188168	0.1568588	0.2137053	147	301	462	9.60E-09	2.53E-07
463	Age-gain	GO Biological Process	GO:0001822	kidney development	1685	303.0662	392	1.293447	0.07793241	0.2326409	62	126	197	1.01E-08	2.65E-07
464	Age-gain	GO Biological Process	GO:0090102	cochlea development	383	68.88686	114	1.654887	0.02266402	0.2976501	13	27	35	1.05E-08	2.74E-07
465	Age-gain	GO Biological Process	GO:0048753	pigment granule organization	95	17.08682	41	2.39951	0.008151093	0.4315789	2	4	10	1.10E-08	2.87E-07
466	Age-gain	GO Biological Process	GO:0021521	ventral spinal cord interneuron specification	238	42.80698	79	1.845493	0.01570577	0.3319328	9	12	12	1.13E-08	2.94E-07
467	Age-gain	GO Biological Process	GO:0072289	metanephric nephron tubule formation	234	42.08753	78	1.85328	0.01550696	0.3333333	3	3	4	1.13E-08	2.94E-07
468	Age-gain	GO Biological Process	GO:0008285	negative regulation of cell proliferation	2248	404.3281	505	1.248986	0.1003976	0.2246441	101	245	458	1.14E-08	2.95E-07
469	Age-gain	GO Biological Process	GO:0000902	cell morphogenesis	3796	682.7533	808	1.183443	0.1606362	0.2128556	172	371	620	1.28E-08	3.29E-07
470	Age-gain	GO Biological Process	GO:0006622	protein targeting to lysosome	92	16.54724	40	2.417322	0.007952286	0.4347826	1	2	6	1.28E-08	3.29E-07
471	Age-gain	GO Biological Process	GO:0072665	protein localization to vacuole	92	16.54724	40	2.417322	0.007952286	0.4347826	1	2	9	1.28E-08	3.29E-07
472	Age-gain	GO Biological Process	GO:0045892	negative regulation of transcription, DNA-dependent	6292	1131.687	1283	1.133706	0.2550696	0.2039097	253	491	811	1.34E-08	3.45E-07
473	Age-gain	GO Biological Process	GO:0007021	tubulin complex assembly	113	20.32432	46	2.263298	0.009145129	0.4070796	1	1	4	1.35E-08	3.45E-07
474	Age-gain	GO Biological Process	GO:0021650	vestibulocochlear nerve formation	219	39.38962	74	1.878668	0.01471173	0.3378995	1	1	1	1.39E-08	3.52E-07
475	Age-gain	GO Biological Process	GO:0035566	regulation of metanephros size	219	39.38962	74	1.878668	0.01471173	0.3378995	1	1	2	1.39E-08	3.52E-07
476	Age-gain	GO Biological Process	GO:0061360	optic chiasma development	219	39.38962	74	1.878668	0.01471173	0.3378995	1	1	1	1.39E-08	3.52E-07
477	Age-gain	GO Biological Process	GO:2000597	positive regulation of optic nerve formation	219	39.38962	74	1.878668	0.01471173	0.3378995	1	1	1	1.39E-08	3.52E-07
478	Age-gain	GO Biological Process	GO:0002068	glandular epithelial cell development	231	41.54795	77	1.85328	0.01530815	0.3333333	7	10	13	1.40E-08	3.54E-07
479	Age-gain	GO Biological Process	GO:0072202	cell differentiation involved in metanephros development	313	56.29657	97	1.723018	0.01928429	0.3099042	5	8	11	1.43E-08	3.61E-07
480	Age-gain	GO Biological Process	GO:0071695	anatomical structure maturation	364	65.4695	109	1.664897	0.02166998	0.2994505	14	31	47	1.53E-08	3.84E-07
481	Age-gain	GO Biological Process	GO:0060017	parathyroid gland development	63	11.33126	31	2.735795	0.006163022	0.4920635	4	5	7	1.57E-08	3.94E-07
482	Age-gain	GO Biological Process	GO:1902337	regulation of apoptotic process involved in morphogenesis	248	44.60559	81	1.815916	0.01610338	0.3266129	4	5	10	1.68E-08	4.21E-07
483	Age-gain	GO Biological Process	GO:1902338	negative regulation of apoptotic process involved in morphogenesis	248	44.60559	81	1.815916	0.01610338	0.3266129	4	5	6	1.68E-08	4.21E-07
484	Age-gain	GO Biological Process	GO:0021781	glial cell fate commitment	236	42.44726	78	1.837575	0.01550696	0.3305085	12	13	15	1.72E-08	4.25E-07
485	Age-gain	GO Biological Process	GO:0045918	negative regulation of cytolysis	220	39.56948	74	1.870128	0.01471173	0.3363636	1	2	3	1.72E-08	4.25E-07
486	Age-gain	GO Biological Process	GO:0039003	pronephric field specification	228	41.00837	76	1.85328	0.01510934	0.3333333	2	2	2	1.73E-08	4.25E-07
487	Age-gain	GO Biological Process	GO:0072305	negative regulation of mesenchymal cell apoptotic process involved in metanephric nephron morphogenesis	228	41.00837	76	1.85328	0.01510934	0.3333333	2	2	2	1.73E-08	4.25E-07
488	Age-gain	GO Biological Process	GO:1900215	negative regulation of apoptotic process involved in metanephric collecting duct development	228	41.00837	76	1.85328	0.01510934	0.3333333	2	2	2	1.73E-08	4.25E-07
489	Age-gain	GO Biological Process	GO:1900218	negative regulation of apoptotic process involved in metanephric nephron tubule development	228	41.00837	76	1.85328	0.01510934	0.3333333	2	2	2	1.73E-08	4.25E-07
490	Age-gain	GO Biological Process	GO:2000594	positive regulation of metanephric DCT cell differentiation	228	41.00837	76	1.85328	0.01510934	0.3333333	2	2	2	1.73E-08	4.25E-07
491	Age-gain	GO Biological Process	GO:0021536	diencephalon development	1072	192.8113	264	1.369215	0.05248509	0.2462687	36	54	72	1.75E-08	4.27E-07
492	Age-gain	GO Biological Process	GO:0060548	negative regulation of cell death	2421	435.4441	538	1.23552	0.1069583	0.2222222	118	280	534	1.75E-08	4.27E-07
493	Age-gain	GO Biological Process	GO:0035148	tube formation	1283	230.762	308	1.334709	0.0612326	0.2400624	49	89	128	1.76E-08	4.29E-07
494	Age-gain	GO Biological Process	GO:0021954	central nervous system neuron development	758	136.3348	197	1.444972	0.03916501	0.2598945	30	51	64	1.80E-08	4.38E-07
495	Age-gain	GO Biological Process	GO:0032989	cellular component morphogenesis	3902	701.8186	827	1.178367	0.1644135	0.2119426	180	398	696	1.84E-08	4.46E-07
496	Age-gain	GO Biological Process	GO:0002475	antigen processing and presentation via MHC class Ib	93	16.7271	40	2.391329	0.007952286	0.4301075	1	2	9	1.85E-08	4.47E-07
497	Age-gain	GO Biological Process	GO:0032438	melanosome organization	93	16.7271	40	2.391329	0.007952286	0.4301075	1	3	9	1.85E-08	4.47E-07
498	Age-gain	GO Biological Process	GO:0048007	antigen processing and presentation, exogenous lipid antigen via MHC class Ib	93	16.7271	40	2.391329	0.007952286	0.4301075	1	2	4	1.85E-08	4.47E-07
499	Age-gain	GO Biological Process	GO:0044708	single-organism behavior	1977	355.5857	449	1.262705	0.08926441	0.2271118	93	215	389	2.00E-08	4.79E-07
500	Age-gain	GO Biological Process	GO:0051451	myoblast migration	24	4.31667	17	3.938221	0.003379722	0.7083333	2	3	4	2.00E-08	4.79E-07
501	Age-gain	GO Biological Process	GO:0060350	endochondral bone morphogenesis	422	75.90145	122	1.607347	0.02425447	0.2890995	18	30	47	2.10E-08	5.01E-07
502	Age-gain	GO Biological Process	GO:0072003	kidney rudiment formation	229	41.18823	76	1.845187	0.01510934	0.3318777	2	3	3	2.14E-08	5.07E-07
503	Age-gain	GO Biological Process	GO:0042268	regulation of cytolysis	221	39.74934	74	1.861666	0.01471173	0.3348416	1	3	6	2.14E-08	5.07E-07
504	Age-gain	GO Biological Process	GO:0072300	positive regulation of metanephric glomerulus development	221	39.74934	74	1.861666	0.01471173	0.3348416	1	2	3	2.14E-08	5.07E-07
505	Age-gain	GO Biological Process	GO:0035564	regulation of kidney size	225	40.46878	75	1.85328	0.01491054	0.3333333	2	2	4	2.14E-08	5.07E-07
506	Age-gain	GO Biological Process	GO:0001707	mesoderm formation	524	94.2473	145	1.538506	0.02882704	0.2767176	18	41	58	2.32E-08	5.49E-07
507	Age-gain	GO Biological Process	GO:0030334	regulation of cell migration	1569	282.2023	366	1.296942	0.07276342	0.2332696	79	209	408	2.35E-08	5.53E-07
508	Age-gain	GO Biological Process	GO:0072234	metanephric nephron tubule development	337	60.61324	102	1.682801	0.02027833	0.3026706	8	11	16	2.39E-08	5.63E-07
509	Age-gain	GO Biological Process	GO:0021778	oligodendrocyte cell fate specification	190	34.17364	66	1.931313	0.01312127	0.3473684	6	6	6	2.45E-08	5.74E-07
510	Age-gain	GO Biological Process	GO:0090193	positive regulation of glomerulus development	254	45.68476	82	1.794909	0.01630219	0.3228346	2	3	4	2.48E-08	5.80E-07
511	Age-gain	GO Biological Process	GO:0070170	regulation of tooth mineralization	194	34.89308	67	1.920151	0.01332008	0.3453608	2	3	5	2.50E-08	5.83E-07
512	Age-gain	GO Biological Process	GO:0048589	developmental growth	1336	240.2946	318	1.323375	0.06322068	0.238024	64	127	204	2.55E-08	5.95E-07
513	Age-gain	GO Biological Process	GO:0072668	tubulin complex biogenesis	115	20.68404	46	2.223936	0.009145129	0.4	1	2	6	2.57E-08	5.97E-07
514	Age-gain	GO Biological Process	GO:0061004	pattern specification involved in kidney development	363	65.28964	108	1.654168	0.02147117	0.2975207	8	9	9	2.59E-08	6.00E-07
515	Age-gain	GO Biological Process	GO:0048664	neuron fate determination	171	30.75628	61	1.983335	0.01212724	0.3567251	7	8	8	2.68E-08	6.20E-07
516	Age-gain	GO Biological Process	GO:0007610	behavior	2252	405.0476	503	1.241829	0.1	0.223357	110	246	450	2.70E-08	6.23E-07
517	Age-gain	GO Biological Process	GO:0021523	somatic motor neuron differentiation	119	21.40349	47	2.195904	0.009343936	0.394958	4	5	7	2.91E-08	6.71E-07
518	Age-gain	GO Biological Process	GO:0042059	negative regulation of epidermal growth factor receptor signaling pathway	52	9.352786	27	2.88684	0.005367793	0.5192308	2	5	14	3.07E-08	7.03E-07
519	Age-gain	GO Biological Process	GO:1901185	negative regulation of ERBB signaling pathway	52	9.352786	27	2.88684	0.005367793	0.5192308	2	5	15	3.07E-08	7.03E-07
520	Age-gain	GO Biological Process	GO:0010771	negative regulation of cell morphogenesis involved in differentiation	109	19.60488	44	2.244339	0.008747515	0.4036697	8	13	19	3.71E-08	8.50E-07
521	Age-gain	GO Biological Process	GO:0007519	skeletal muscle tissue development	924	166.1918	231	1.38996	0.04592445	0.25	33	73	123	3.76E-08	8.59E-07
522	Age-gain	GO Biological Process	GO:0014020	primary neural tube formation	962	173.0265	239	1.381291	0.04751491	0.2484407	28	54	81	3.84E-08	8.74E-07
523	Age-gain	GO Biological Process	GO:0060538	skeletal muscle organ development	948	170.5085	236	1.384095	0.04691849	0.2489451	35	77	129	3.90E-08	8.87E-07
524	Age-gain	GO Biological Process	GO:0072040	negative regulation of mesenchymal cell apoptotic process involved in nephron morphogenesis	236	42.44726	77	1.814016	0.01530815	0.3262712	3	4	4	3.94E-08	8.93E-07
525	Age-gain	GO Biological Process	GO:0072307	regulation of metanephric nephron tubule epithelial cell differentiation	232	41.72781	76	1.821327	0.01510934	0.3275862	2	3	5	3.98E-08	9.00E-07
526	Age-gain	GO Biological Process	GO:0021633	optic nerve structural organization	224	40.28892	74	1.836733	0.01471173	0.3303571	1	2	2	4.03E-08	9.08E-07
527	Age-gain	GO Biological Process	GO:0001841	neural tube formation	991	178.2425	245	1.374532	0.04870775	0.247225	32	60	94	4.04E-08	9.08E-07
528	Age-gain	GO Biological Process	GO:0090192	regulation of glomerulus development	273	49.10212	86	1.751452	0.01709742	0.3150183	3	7	10	4.05E-08	9.08E-07
529	Age-gain	GO Biological Process	GO:0016525	negative regulation of angiogenesis	220	39.56948	73	1.844856	0.01451292	0.3318182	11	28	59	4.05E-08	9.08E-07
530	Age-gain	GO Biological Process	GO:0035726	common myeloid progenitor cell proliferation	85	15.28821	37	2.420166	0.007355865	0.4352941	1	1	3	4.27E-08	9.55E-07
531	Age-gain	GO Biological Process	GO:0072170	metanephric tubule development	345	62.05213	103	1.659895	0.02047714	0.2985507	9	13	18	4.43E-08	9.90E-07
532	Age-gain	GO Biological Process	GO:0007041	lysosomal transport	154	27.69863	56	2.02176	0.0111332	0.3636364	6	17	32	4.58E-08	1.02E-06
533	Age-gain	GO Biological Process	GO:0072108	positive regulation of mesenchymal to epithelial transition involved in metanephros morphogenesis	233	41.90767	76	1.81351	0.01510934	0.3261803	2	3	4	4.87E-08	1.08E-06
534	Age-gain	GO Biological Process	GO:0072163	mesonephric epithelium development	350	62.95144	104	1.652067	0.02067594	0.2971429	9	14	14	4.98E-08	1.11E-06
535	Age-gain	GO Biological Process	GO:0072207	metanephric epithelium development	342	61.51255	102	1.658198	0.02027833	0.2982456	8	12	19	5.44E-08	1.20E-06
536	Age-gain	GO Biological Process	GO:0007034	vacuolar transport	155	27.8785	56	2.008717	0.0111332	0.3612903	6	18	38	5.92E-08	1.30E-06
537	Age-gain	GO Biological Process	GO:0061418	regulation of transcription from RNA polymerase II promoter in response to hypoxia	155	27.8785	56	2.008717	0.0111332	0.3612903	1	4	5	5.92E-08	1.30E-06
538	Age-gain	GO Biological Process	GO:0045638	negative regulation of myeloid cell differentiation	478	85.97368	133	1.546985	0.02644135	0.2782427	21	35	74	6.15E-08	1.35E-06
539	Age-gain	GO Biological Process	GO:2000648	positive regulation of stem cell proliferation	668	120.1473	175	1.456545	0.03479125	0.261976	28	51	61	6.20E-08	1.36E-06
540	Age-gain	GO Biological Process	GO:1900212	negative regulation of mesenchymal cell apoptotic process involved in metanephros development	239	42.98684	77	1.791246	0.01530815	0.3221757	3	4	4	7.16E-08	1.57E-06
541	Age-gain	GO Biological Process	GO:0072298	regulation of metanephric glomerulus development	227	40.82851	74	1.812459	0.01471173	0.3259912	1	4	6	7.46E-08	1.63E-06
542	Age-gain	GO Biological Process	GO:0043618	regulation of transcription from RNA polymerase II promoter in response to stress	160	28.7778	57	1.980693	0.01133201	0.35625	2	7	15	7.94E-08	1.73E-06
543	Age-gain	GO Biological Process	GO:0051253	negative regulation of RNA metabolic process	6398	1150.752	1294	1.124482	0.2572565	0.2022507	261	515	846	8.16E-08	1.78E-06
544	Age-gain	GO Biological Process	GO:0048806	genitalia development	516	92.80841	141	1.519259	0.02803181	0.2732558	19	34	49	8.27E-08	1.79E-06
545	Age-gain	GO Biological Process	GO:0072088	nephron epithelium morphogenesis	543	97.66466	147	1.50515	0.02922465	0.2707182	18	27	30	8.28E-08	1.79E-06
546	Age-gain	GO Biological Process	GO:0021983	pituitary gland development	648	116.5501	170	1.4586	0.03379722	0.2623457	22	35	43	8.61E-08	1.86E-06
547	Age-gain	GO Biological Process	GO:0003406	retinal pigment epithelium development	236	42.44726	76	1.790457	0.01510934	0.3220339	2	3	4	8.85E-08	1.90E-06
548	Age-gain	GO Biological Process	GO:0048667	cell morphogenesis involved in neuron differentiation	2272	408.6448	503	1.230898	0.1	0.2213908	106	207	291	8.86E-08	1.90E-06
549	Age-gain	GO Biological Process	GO:2000179	positive regulation of neural precursor cell proliferation	463	83.27576	129	1.54907	0.02564612	0.2786177	16	29	37	8.87E-08	1.90E-06
550	Age-gain	GO Biological Process	GO:0021615	glossopharyngeal nerve morphogenesis	45	8.093757	24	2.965249	0.004771372	0.5333333	2	3	3	9.14E-08	1.96E-06
551	Age-gain	GO Biological Process	GO:0014032	neural crest cell development	649	116.73	170	1.456353	0.03379722	0.2619414	25	42	53	9.62E-08	2.06E-06
552	Age-gain	GO Biological Process	GO:0010092	specification of organ identity	433	77.87993	122	1.566514	0.02425447	0.2817552	10	12	13	1.01E-07	2.16E-06
553	Age-gain	GO Biological Process	GO:0021623	oculomotor nerve formation	64	11.51112	30	2.606175	0.005964215	0.46875	2	2	2	1.07E-07	2.28E-06
554	Age-gain	GO Biological Process	GO:0007422	peripheral nervous system development	465	83.63549	129	1.542407	0.02564612	0.2774194	21	38	61	1.16E-07	2.46E-06
555	Age-gain	GO Biological Process	GO:0003327	type B pancreatic cell fate commitment	21	3.777086	15	3.971315	0.002982107	0.7142857	1	1	1	1.18E-07	2.50E-06
556	Age-gain	GO Biological Process	GO:0060580	ventral spinal cord interneuron fate determination	21	3.777086	15	3.971315	0.002982107	0.7142857	1	1	1	1.18E-07	2.50E-06
557	Age-gain	GO Biological Process	GO:0003339	regulation of mesenchymal to epithelial transition involved in metanephros morphogenesis	238	42.80698	76	1.775411	0.01510934	0.3193277	2	5	7	1.30E-07	2.75E-06
558	Age-gain	GO Biological Process	GO:0021987	cerebral cortex development	876	157.5585	218	1.383613	0.04333996	0.2488584	36	61	82	1.32E-07	2.78E-06
559	Age-gain	GO Biological Process	GO:0021517	ventral spinal cord development	862	155.0404	215	1.386735	0.04274354	0.24942	31	39	48	1.34E-07	2.82E-06
560	Age-gain	GO Biological Process	GO:0072282	metanephric nephron tubule morphogenesis	255	45.86462	80	1.744264	0.01590457	0.3137255	5	7	8	1.43E-07	3.00E-06
561	Age-gain	GO Biological Process	GO:0051172	negative regulation of nitrogen compound metabolic process	6547	1177.552	1319	1.120121	0.2622266	0.2014663	272	551	923	1.43E-07	3.00E-06
562	Age-gain	GO Biological Process	GO:0001843	neural tube closure	953	171.4078	234	1.365166	0.04652087	0.2455404	27	51	76	1.46E-07	3.05E-06
563	Age-gain	GO Biological Process	GO:0071599	otic vesicle development	99	17.80626	40	2.2464	0.007952286	0.4040404	8	11	15	1.48E-07	3.07E-06
564	Age-gain	GO Biological Process	GO:0045934	negative regulation of nucleobase-containing compound metabolic process	6532	1174.854	1316	1.120139	0.2616302	0.2014697	270	547	911	1.49E-07	3.09E-06
565	Age-gain	GO Biological Process	GO:0072095	regulation of branch elongation involved in ureteric bud branching	40	7.19445	22	3.057913	0.004373757	0.55	4	4	4	1.52E-07	3.16E-06
566	Age-gain	GO Biological Process	GO:0072107	positive regulation of ureteric bud formation	49	8.813202	25	2.836654	0.004970179	0.5102041	3	4	4	1.55E-07	3.21E-06
567	Age-gain	GO Biological Process	GO:0035264	multicellular organism growth	366	65.82922	106	1.610227	0.02107356	0.2896175	23	43	77	1.56E-07	3.22E-06
568	Age-gain	GO Biological Process	GO:0060606	tube closure	954	171.5876	234	1.363735	0.04652087	0.245283	27	52	77	1.60E-07	3.29E-06
569	Age-gain	GO Biological Process	GO:0007224	smoothened signaling pathway	320	57.5556	95	1.650578	0.01888668	0.296875	22	36	58	1.94E-07	3.98E-06
570	Age-gain	GO Biological Process	GO:0048332	mesoderm morphogenesis	546	98.20425	146	1.486697	0.02902584	0.2673993	19	45	62	2.05E-07	4.21E-06
571	Age-gain	GO Biological Process	GO:2000677	regulation of transcription regulatory region DNA binding	137	24.64099	50	2.029139	0.009940358	0.3649635	6	14	17	2.06E-07	4.22E-06
572	Age-gain	GO Biological Process	GO:0007517	muscle organ development	1755	315.6565	397	1.257696	0.07892644	0.2262108	70	140	233	2.19E-07	4.49E-06
573	Age-gain	GO Biological Process	GO:0021563	glossopharyngeal nerve development	56	10.07223	27	2.680638	0.005367793	0.4821429	3	4	4	2.24E-07	4.56E-06
574	Age-gain	GO Biological Process	GO:0072028	nephron morphogenesis	552	99.28342	147	1.48061	0.02922465	0.2663043	18	31	34	2.43E-07	4.95E-06
575	Age-gain	GO Biological Process	GO:0043010	camera-type eye development	2058	370.1545	457	1.23462	0.09085487	0.2220603	74	165	262	2.53E-07	5.14E-06
576	Age-gain	GO Biological Process	GO:0071260	cellular response to mechanical stimulus	254	45.68476	79	1.729242	0.01570577	0.3110236	5	16	47	2.54E-07	5.16E-06
577	Age-gain	GO Biological Process	GO:0048565	digestive tract development	770	138.4932	194	1.400791	0.03856859	0.2519481	43	79	113	2.58E-07	5.23E-06
578	Age-gain	GO Biological Process	GO:0021819	layer formation in cerebral cortex	63	11.33126	29	2.559292	0.005765408	0.4603175	5	7	10	2.83E-07	5.72E-06
579	Age-gain	GO Biological Process	GO:0072164	mesonephric tubule development	344	61.87227	100	1.616233	0.01988072	0.2906977	8	13	13	2.84E-07	5.73E-06
580	Age-gain	GO Biological Process	GO:0072173	metanephric tubule morphogenesis	263	47.30351	81	1.712346	0.01610338	0.3079848	6	9	10	2.85E-07	5.73E-06
581	Age-gain	GO Biological Process	GO:0072161	mesenchymal cell differentiation involved in kidney development	259	46.58407	80	1.717325	0.01590457	0.3088803	4	6	7	2.94E-07	5.91E-06
582	Age-gain	GO Biological Process	GO:0043620	regulation of DNA-dependent transcription in response to stress	166	29.85697	57	1.909102	0.01133201	0.3433735	2	8	18	3.30E-07	6.63E-06
583	Age-gain	GO Biological Process	GO:0043524	negative regulation of neuron apoptotic process	768	138.1334	193	1.3972	0.03836978	0.2513021	32	70	115	3.35E-07	6.71E-06
584	Age-gain	GO Biological Process	GO:0071496	cellular response to external stimulus	529	95.14661	141	1.481924	0.02803181	0.2665406	26	67	162	4.01E-07	8.02E-06
585	Age-gain	GO Biological Process	GO:0072215	regulation of metanephros development	265	47.66323	81	1.699423	0.01610338	0.3056604	4	12	18	4.03E-07	8.04E-06
586	Age-gain	GO Biological Process	GO:0021530	spinal cord oligodendrocyte cell fate specification	33	5.935422	19	3.201121	0.003777336	0.5757576	3	3	3	4.11E-07	8.18E-06
587	Age-gain	GO Biological Process	GO:1901215	negative regulation of neuron death	771	138.673	193	1.391763	0.03836978	0.2503243	32	72	120	4.47E-07	8.87E-06
588	Age-gain	GO Biological Process	GO:0071773	cellular response to BMP stimulus	152	27.33891	53	1.938629	0.01053678	0.3486842	9	14	18	4.86E-07	9.64E-06
589	Age-gain	GO Biological Process	GO:0055123	digestive system development	805	144.7883	200	1.381327	0.03976143	0.2484472	47	86	123	4.89E-07	9.68E-06
590	Age-gain	GO Biological Process	GO:0072283	metanephric renal vesicle morphogenesis	361	64.92991	103	1.586326	0.02047714	0.2853186	8	11	11	5.06E-07	9.99E-06
591	Age-gain	GO Biological Process	GO:0019884	antigen processing and presentation of exogenous antigen	103	18.52571	40	2.159162	0.007952286	0.3883495	1	7	29	5.13E-07	1.01E-05
592	Age-gain	GO Biological Process	GO:0051091	positive regulation of sequence-specific DNA binding transcription factor activity	513	92.26883	137	1.484792	0.02723658	0.2670565	37	85	155	5.18E-07	1.02E-05
593	Age-gain	GO Biological Process	GO:0061333	renal tubule morphogenesis	504	90.65008	135	1.489243	0.02683897	0.2678571	14	22	25	5.23E-07	1.03E-05
594	Age-gain	GO Biological Process	GO:0072513	positive regulation of secondary heart field cardioblast proliferation	28	5.036115	17	3.375618	0.003379722	0.6071429	2	3	4	5.92E-07	1.16E-05
595	Age-gain	GO Biological Process	GO:0033059	cellular pigmentation	115	20.68404	43	2.078897	0.008548708	0.373913	4	8	23	6.65E-07	1.30E-05
596	Age-gain	GO Biological Process	GO:0021912	regulation of transcription from RNA polymerase II promoter involved in spinal cord motor neuron fate specification	119	21.40349	44	2.05574	0.008747515	0.3697479	3	4	4	7.11E-07	1.39E-05
597	Age-gain	GO Biological Process	GO:0072077	renal vesicle morphogenesis	368	66.18894	104	1.571259	0.02067594	0.2826087	9	12	12	7.32E-07	1.42E-05
598	Age-gain	GO Biological Process	GO:0030534	adult behavior	838	150.7237	206	1.366739	0.04095427	0.2458234	36	85	137	7.39E-07	1.44E-05
599	Age-gain	GO Biological Process	GO:0048812	neuron projection morphogenesis	2316	416.5587	504	1.209914	0.1001988	0.2176166	109	217	304	7.71E-07	1.50E-05
600	Age-gain	GO Biological Process	GO:0072162	metanephric mesenchymal cell differentiation	248	44.60559	76	1.703822	0.01510934	0.3064516	3	5	5	8.08E-07	1.57E-05
601	Age-gain	GO Biological Process	GO:0010629	negative regulation of gene expression	6774	1218.38	1352	1.10967	0.2687873	0.1995867	280	553	909	8.11E-07	1.57E-05
602	Age-gain	GO Biological Process	GO:0072001	renal system development	2136	384.1837	468	1.218167	0.09304175	0.2191011	83	165	250	9.02E-07	1.74E-05
603	Age-gain	GO Biological Process	GO:0042462	eye photoreceptor cell development	147	26.43961	51	1.928924	0.01013917	0.3469388	8	20	32	9.41E-07	1.81E-05
604	Age-gain	GO Biological Process	GO:0043491	protein kinase B signaling cascade	279	50.18129	83	1.654003	0.01650099	0.297491	6	15	30	1.01E-06	1.94E-05
605	Age-gain	GO Biological Process	GO:0021772	olfactory bulb development	542	97.4848	142	1.456637	0.02823062	0.2619926	17	27	34	1.05E-06	2.01E-05
606	Age-gain	GO Biological Process	GO:2000177	regulation of neural precursor cell proliferation	612	110.0751	157	1.426299	0.03121272	0.2565359	24	44	60	1.13E-06	2.17E-05
607	Age-gain	GO Biological Process	GO:0021988	olfactory lobe development	543	97.66466	142	1.453955	0.02823062	0.2615101	17	28	35	1.17E-06	2.24E-05
608	Age-gain	GO Biological Process	GO:0003334	keratinocyte development	84	15.10835	34	2.250412	0.006759443	0.4047619	3	4	6	1.18E-06	2.24E-05
609	Age-gain	GO Biological Process	GO:2001055	positive regulation of mesenchymal cell apoptotic process	29	5.215977	17	3.259217	0.003379722	0.5862069	2	3	3	1.19E-06	2.27E-05
610	Age-gain	GO Biological Process	GO:0072091	regulation of stem cell proliferation	815	146.5869	200	1.364378	0.03976143	0.2453988	34	62	81	1.21E-06	2.30E-05
611	Age-gain	GO Biological Process	GO:0042330	taxis	1985	357.0246	437	1.224005	0.08687873	0.2201511	92	180	340	1.26E-06	2.38E-05
612	Age-gain	GO Biological Process	GO:0006935	chemotaxis	1970	354.3267	434	1.224858	0.08628231	0.2203046	91	179	339	1.27E-06	2.40E-05
613	Age-gain	GO Biological Process	GO:0044260	cellular macromolecule metabolic process	17338	3118.435	3265	1.047	0.6491054	0.1883147	897	2490	5259	1.28E-06	2.41E-05
614	Age-gain	GO Biological Process	GO:0061180	mammary gland epithelium development	660	118.7084	167	1.406808	0.0332008	0.2530303	24	44	63	1.30E-06	2.46E-05
615	Age-gain	GO Biological Process	GO:0002686	negative regulation of leukocyte migration	41	7.374312	21	2.847723	0.00417495	0.5121951	4	6	15	1.40E-06	2.64E-05
616	Age-gain	GO Biological Process	GO:2000145	regulation of cell motility	1672	300.728	374	1.243649	0.07435388	0.2236842	83	218	427	1.60E-06	3.00E-05
617	Age-gain	GO Biological Process	GO:0002098	tRNA wobble uridine modification	12	2.158335	10	4.633201	0.001988072	0.8333333	2	2	5	1.63E-06	3.04E-05
618	Age-gain	GO Biological Process	GO:0034227	tRNA thio-modification	12	2.158335	10	4.633201	0.001988072	0.8333333	2	2	4	1.63E-06	3.04E-05
619	Age-gain	GO Biological Process	GO:0010944	negative regulation of transcription by competitive promoter binding	78	14.02918	32	2.28096	0.006361829	0.4102564	3	5	7	1.69E-06	3.16E-05
620	Age-gain	GO Biological Process	GO:0060479	lung cell differentiation	379	68.16742	105	1.540325	0.02087475	0.2770449	13	23	29	1.78E-06	3.32E-05
621	Age-gain	GO Biological Process	GO:0060428	lung epithelium development	397	71.40492	109	1.526505	0.02166998	0.2745592	15	28	36	1.82E-06	3.38E-05
622	Age-gain	GO Biological Process	GO:0051865	protein autoubiquitination	182	32.73475	59	1.802366	0.01172962	0.3241758	4	12	34	1.82E-06	3.38E-05
623	Age-gain	GO Biological Process	GO:0060560	developmental growth involved in morphogenesis	858	154.321	208	1.34784	0.04135189	0.2424242	35	69	90	1.83E-06	3.40E-05
624	Age-gain	GO Biological Process	GO:2001054	negative regulation of mesenchymal cell apoptotic process	266	47.8431	79	1.651231	0.01570577	0.2969925	5	10	10	1.95E-06	3.60E-05
625	Age-gain	GO Biological Process	GO:0042476	odontogenesis	674	121.2265	169	1.394085	0.03359841	0.2507418	38	65	87	2.04E-06	3.77E-05
626	Age-gain	GO Biological Process	GO:2000178	negative regulation of neural precursor cell proliferation	97	17.44654	37	2.120764	0.007355865	0.3814433	5	10	17	2.24E-06	4.13E-05
627	Age-gain	GO Biological Process	GO:0042696	menarche	30	5.395838	17	3.150577	0.003379722	0.5666667	1	1	1	2.29E-06	4.21E-05
628	Age-gain	GO Biological Process	GO:0060487	lung epithelial cell differentiation	372	66.90839	103	1.539418	0.02047714	0.2768817	12	22	28	2.29E-06	4.21E-05
629	Age-gain	GO Biological Process	GO:0008344	adult locomotory behavior	713	128.2411	177	1.380213	0.03518887	0.2482468	28	59	90	2.30E-06	4.22E-05
630	Age-gain	GO Biological Process	GO:0021799	cerebral cortex radially oriented cell migration	229	41.18823	70	1.699515	0.0139165	0.3056769	10	18	25	2.38E-06	4.35E-05
631	Age-gain	GO Biological Process	GO:0031327	negative regulation of cellular biosynthetic process	6743	1212.804	1340	1.104877	0.2664016	0.1987246	282	573	969	2.40E-06	4.39E-05
632	Age-gain	GO Biological Process	GO:0022601	menstrual cycle phase	39	7.014589	20	2.8512	0.003976143	0.5128205	3	5	5	2.43E-06	4.43E-05
633	Age-gain	GO Biological Process	GO:0032908	regulation of transforming growth factor beta1 production	39	7.014589	20	2.8512	0.003976143	0.5128205	2	2	7	2.43E-06	4.43E-05
634	Age-gain	GO Biological Process	GO:0019882	antigen processing and presentation	120	21.58335	43	1.992276	0.008548708	0.3583333	2	9	81	2.48E-06	4.51E-05
635	Age-gain	GO Biological Process	GO:2000113	negative regulation of cellular macromolecule biosynthetic process	6622	1191.041	1317	1.105755	0.261829	0.1988825	272	546	907	2.61E-06	4.73E-05
636	Age-gain	GO Biological Process	GO:0043525	positive regulation of neuron apoptotic process	213	38.31045	66	1.722768	0.01312127	0.3098592	10	22	37	2.72E-06	4.93E-05
637	Age-gain	GO Biological Process	GO:0010558	negative regulation of macromolecule biosynthetic process	6645	1195.178	1321	1.105275	0.2626243	0.1987961	275	559	940	2.74E-06	4.95E-05
638	Age-gain	GO Biological Process	GO:0048514	blood vessel morphogenesis	1631	293.3537	364	1.240823	0.07236581	0.223176	92	218	358	2.76E-06	4.99E-05
639	Age-gain	GO Biological Process	GO:0072176	nephric duct development	338	60.79311	95	1.562677	0.01888668	0.2810651	8	12	12	2.78E-06	5.01E-05
640	Age-gain	GO Biological Process	GO:0072199	regulation of mesenchymal cell proliferation involved in ureter development	52	9.352786	24	2.56608	0.004771372	0.4615385	4	4	4	2.79E-06	5.02E-05
641	Age-gain	GO Biological Process	GO:0001755	neural crest cell migration	528	94.96675	137	1.44261	0.02723658	0.2594697	21	29	37	2.80E-06	5.03E-05
642	Age-gain	GO Biological Process	GO:0009890	negative regulation of biosynthetic process	6760	1215.862	1342	1.103744	0.2667992	0.1985207	283	579	985	2.93E-06	5.25E-05
643	Age-gain	GO Biological Process	GO:2000736	regulation of stem cell differentiation	768	138.1334	188	1.361003	0.03737575	0.2447917	36	56	72	2.96E-06	5.29E-05
644	Age-gain	GO Biological Process	GO:0021885	forebrain cell migration	543	97.66466	140	1.433476	0.027833	0.2578269	18	38	51	3.16E-06	5.65E-05
645	Age-gain	GO Biological Process	GO:0002088	lens development in camera-type eye	642	115.4709	161	1.39429	0.03200795	0.2507788	19	37	63	3.50E-06	6.23E-05
646	Age-gain	GO Biological Process	GO:0007379	segment specification	194	34.89308	61	1.748197	0.01212724	0.314433	10	14	16	3.77E-06	6.71E-05
647	Age-gain	GO Biological Process	GO:2000117	negative regulation of cysteine-type endopeptidase activity	421	75.72159	113	1.492309	0.02246521	0.2684086	9	27	60	3.83E-06	6.80E-05
648	Age-gain	GO Biological Process	GO:0072087	renal vesicle development	385	69.24659	105	1.51632	0.02087475	0.2727273	10	14	14	3.86E-06	6.84E-05
649	Age-gain	GO Biological Process	GO:0007411	axon guidance	1657	298.0301	368	1.234775	0.07316103	0.2220881	73	124	157	3.92E-06	6.93E-05
650	Age-gain	GO Biological Process	GO:0002052	positive regulation of neuroblast proliferation	249	44.78545	74	1.652322	0.01471173	0.2971888	8	17	20	3.93E-06	6.94E-05
651	Age-gain	GO Biological Process	GO:0010001	glial cell differentiation	1204	216.553	277	1.279133	0.05506958	0.2300664	43	74	114	4.00E-06	7.06E-05
652	Age-gain	GO Biological Process	GO:0048490	anterograde synaptic vesicle transport	122	21.94307	43	1.959616	0.008548708	0.352459	2	5	15	4.07E-06	7.16E-05
653	Age-gain	GO Biological Process	GO:0045137	development of primary sexual characteristics	1106	198.9266	257	1.291934	0.05109344	0.2323689	55	120	210	4.10E-06	7.20E-05
654	Age-gain	GO Biological Process	GO:0009605	response to external stimulus	3504	630.2339	727	1.15354	0.1445328	0.2074772	162	380	793	4.11E-06	7.21E-05
655	Age-gain	GO Biological Process	GO:0031175	neuron projection development	2611	469.6178	555	1.181812	0.110338	0.2125622	128	273	412	4.13E-06	7.22E-05
656	Age-gain	GO Biological Process	GO:0018202	peptidyl-histidine modification	207	37.23128	64	1.718985	0.01272366	0.3091787	3	5	9	4.14E-06	7.24E-05
657	Age-gain	GO Biological Process	GO:0007498	mesoderm development	815	146.5869	197	1.343912	0.03916501	0.2417178	32	71	95	4.16E-06	7.26E-05
658	Age-gain	GO Biological Process	GO:0060291	long-term synaptic potentiation	103	18.52571	38	2.051203	0.007554672	0.368932	5	12	19	4.21E-06	7.33E-05
659	Age-gain	GO Biological Process	GO:1901216	positive regulation of neuron death	216	38.85003	66	1.69884	0.01312127	0.3055556	10	23	38	4.61E-06	8.01E-05
660	Age-gain	GO Biological Process	GO:0051138	positive regulation of NK T cell differentiation	111	19.9646	40	2.003546	0.007952286	0.3603604	1	4	5	4.67E-06	8.11E-05
661	Age-gain	GO Biological Process	GO:0021514	ventral spinal cord interneuron differentiation	360	64.75005	99	1.528956	0.01968191	0.275	11	15	15	4.90E-06	8.48E-05
662	Age-gain	GO Biological Process	GO:0021631	optic nerve morphogenesis	259	46.58407	76	1.631459	0.01510934	0.2934363	3	5	6	4.91E-06	8.50E-05
663	Age-gain	GO Biological Process	GO:0072178	nephric duct morphogenesis	330	59.35422	92	1.550016	0.01829026	0.2787879	7	9	9	5.70E-06	9.84E-05
664	Age-gain	GO Biological Process	GO:0048844	artery morphogenesis	521	93.70772	134	1.429978	0.02664016	0.2571977	21	42	50	5.81E-06	0.000100207
665	Age-gain	GO Biological Process	GO:0071453	cellular response to oxygen levels	243	43.70629	72	1.64736	0.01431412	0.2962963	11	28	61	5.92E-06	0.000101748
666	Age-gain	GO Biological Process	GO:0072273	metanephric nephron morphogenesis	402	72.30423	108	1.493689	0.02147117	0.2686567	12	20	21	5.92E-06	0.000101748
667	Age-gain	GO Biological Process	GO:0072593	reactive oxygen species metabolic process	326	58.63477	91	1.55198	0.01809145	0.2791411	10	26	66	6.04E-06	0.00010357
668	Age-gain	GO Biological Process	GO:0001704	formation of primary germ layer	724	130.2196	177	1.359243	0.03518887	0.2444751	26	55	79	6.19E-06	0.000105963
669	Age-gain	GO Biological Process	GO:0042461	photoreceptor cell development	168	30.21669	54	1.787092	0.01073559	0.3214286	10	24	40	6.45E-06	0.000110117
670	Age-gain	GO Biological Process	GO:0035137	hindlimb morphogenesis	592	106.4779	149	1.399352	0.02962227	0.2516892	23	37	40	6.45E-06	0.000110117
671	Age-gain	GO Biological Process	GO:0021516	dorsal spinal cord development	578	103.9598	146	1.404389	0.02902584	0.2525952	15	17	20	6.49E-06	0.000110573
672	Age-gain	GO Biological Process	GO:2000729	positive regulation of mesenchymal cell proliferation involved in ureter development	41	7.374312	20	2.712118	0.003976143	0.4878049	3	3	3	6.56E-06	0.000111581
673	Age-gain	GO Biological Process	GO:0021535	cell migration in hindbrain	136	24.46113	46	1.880534	0.009145129	0.3382353	6	10	13	6.82E-06	0.000115714
674	Age-gain	GO Biological Process	GO:0003338	metanephros morphogenesis	408	73.38339	109	1.48535	0.02166998	0.2671569	13	23	27	7.05E-06	0.000119576
675	Age-gain	GO Biological Process	GO:0014706	striated muscle tissue development	1552	279.1447	345	1.235918	0.06858847	0.2222938	69	157	257	7.27E-06	0.000122801
676	Age-gain	GO Biological Process	GO:0003266	regulation of secondary heart field cardioblast proliferation	90	16.18751	34	2.100384	0.006759443	0.3777778	6	8	9	7.27E-06	0.000122801
677	Age-gain	GO Biological Process	GO:0048539	bone marrow development	29	5.215977	16	3.067498	0.003180915	0.5517241	3	3	6	7.30E-06	0.000123029
678	Age-gain	GO Biological Process	GO:0002003	angiotensin maturation	35	6.295144	18	2.859347	0.003578529	0.5142857	1	1	2	7.37E-06	0.000123612
679	Age-gain	GO Biological Process	GO:0032914	positive regulation of transforming growth factor beta1 production	35	6.295144	18	2.859347	0.003578529	0.5142857	1	1	4	7.37E-06	0.000123612
680	Age-gain	GO Biological Process	GO:0045617	negative regulation of keratinocyte differentiation	35	6.295144	18	2.859347	0.003578529	0.5142857	4	5	7	7.37E-06	0.000123612
681	Age-gain	GO Biological Process	GO:0009950	dorsal/ventral axis specification	202	36.33197	62	1.706486	0.01232604	0.3069307	11	15	16	7.52E-06	0.000125899
682	Age-gain	GO Biological Process	GO:0070301	cellular response to hydrogen peroxide	288	51.80004	82	1.58301	0.01630219	0.2847222	9	21	43	7.60E-06	0.000127063
683	Age-gain	GO Biological Process	GO:2000036	regulation of stem cell maintenance	289	51.9799	82	1.577533	0.01630219	0.283737	5	12	14	8.76E-06	0.000146227
684	Age-gain	GO Biological Process	GO:0043154	negative regulation of cysteine-type endopeptidase activity involved in apoptotic process	419	75.36187	111	1.472893	0.02206759	0.2649165	8	26	59	8.81E-06	0.000146792
685	Age-gain	GO Biological Process	GO:0071456	cellular response to hypoxia	229	41.18823	68	1.650957	0.01351889	0.2969432	9	25	56	9.75E-06	0.000162317
686	Age-gain	GO Biological Process	GO:0045880	positive regulation of smoothened signaling pathway	150	26.97919	49	1.816215	0.009741551	0.3266667	11	16	23	1.03E-05	0.000171729
687	Age-gain	GO Biological Process	GO:0008089	anterograde axon cargo transport	126	22.66252	43	1.897406	0.008548708	0.3412698	2	7	19	1.04E-05	0.00017226
688	Age-gain	GO Biological Process	GO:0021892	cerebral cortex GABAergic interneuron differentiation	251	45.14518	73	1.617006	0.01451292	0.2908367	7	10	10	1.05E-05	0.000173971
689	Age-gain	GO Biological Process	GO:0045766	positive regulation of angiogenesis	247	44.42573	72	1.620682	0.01431412	0.291498	18	39	85	1.10E-05	0.000182532
690	Age-gain	GO Biological Process	GO:0014033	neural crest cell differentiation	755	135.7953	182	1.340253	0.0361829	0.2410596	27	47	59	1.13E-05	0.000186539
691	Age-gain	GO Biological Process	GO:0021801	cerebral cortex radial glia guided migration	107	19.24515	38	1.974523	0.007554672	0.3551402	7	12	16	1.18E-05	0.000194245
692	Age-gain	GO Biological Process	GO:0036294	cellular response to decreased oxygen levels	239	42.98684	70	1.628405	0.0139165	0.292887	10	26	57	1.22E-05	0.000200285
693	Age-gain	GO Biological Process	GO:0014812	muscle cell migration	36	6.475005	18	2.77992	0.003578529	0.5	3	7	11	1.23E-05	0.00020131
694	Age-gain	GO Biological Process	GO:2000146	negative regulation of cell motility	501	90.11049	128	1.420478	0.02544732	0.255489	30	64	133	1.31E-05	0.000214963
695	Age-gain	GO Biological Process	GO:0021554	optic nerve development	279	50.18129	79	1.574292	0.01570577	0.2831541	4	8	9	1.37E-05	0.000224471
696	Age-gain	GO Biological Process	GO:0045582	positive regulation of T cell differentiation	223	40.10906	66	1.645513	0.01312127	0.2959641	13	25	58	1.47E-05	0.000240175
697	Age-gain	GO Biological Process	GO:0072182	regulation of nephron tubule epithelial cell differentiation	324	58.27505	89	1.52724	0.01769384	0.2746914	6	7	11	1.50E-05	0.000244377
698	Age-gain	GO Biological Process	GO:2000696	regulation of epithelial cell differentiation involved in kidney development	324	58.27505	89	1.52724	0.01769384	0.2746914	6	7	13	1.50E-05	0.000244377
699	Age-gain	GO Biological Process	GO:0007160	cell-matrix adhesion	152	27.33891	49	1.792317	0.009741551	0.3223684	8	38	72	1.54E-05	0.000251207
700	Age-gain	GO Biological Process	GO:0006829	zinc ion transport	120	21.58335	41	1.899612	0.008151093	0.3416667	2	12	26	1.60E-05	0.000259315
701	Age-gain	GO Biological Process	GO:0010721	negative regulation of cell development	731	131.4786	176	1.338621	0.03499006	0.2407661	35	78	109	1.68E-05	0.000273111
702	Age-gain	GO Biological Process	GO:0021557	oculomotor nerve development	82	14.74862	31	2.101891	0.006163022	0.3780488	3	3	4	1.78E-05	0.000287984
703	Age-gain	GO Biological Process	GO:0048793	pronephros development	308	55.39727	85	1.534372	0.01689861	0.275974	7	7	8	1.91E-05	0.000308439
704	Age-gain	GO Biological Process	GO:0010172	embryonic body morphogenesis	113	20.32432	39	1.918883	0.007753479	0.3451327	3	7	8	1.95E-05	0.000315025
705	Age-gain	GO Biological Process	GO:0048857	neural nucleus development	291	52.33963	81	1.547585	0.01610338	0.2783505	12	16	19	2.12E-05	0.000341371
706	Age-gain	GO Biological Process	GO:2000826	regulation of heart morphogenesis	200	35.97225	60	1.667952	0.01192843	0.3	12	17	22	2.25E-05	0.000361796
707	Age-gain	GO Biological Process	GO:0048536	spleen development	332	59.71394	90	1.507186	0.01789264	0.2710843	11	20	33	2.34E-05	0.000375599
708	Age-gain	GO Biological Process	GO:0045621	positive regulation of lymphocyte differentiation	226	40.64864	66	1.62367	0.01312127	0.2920354	13	27	68	2.35E-05	0.000376555
709	Age-gain	GO Biological Process	GO:0010951	negative regulation of endopeptidase activity	442	79.49868	114	1.433986	0.02266402	0.2579186	10	38	145	2.44E-05	0.000390028
710	Age-gain	GO Biological Process	GO:0009743	response to carbohydrate stimulus	536	96.40564	134	1.38996	0.02664016	0.25	19	44	97	2.59E-05	0.000414593
711	Age-gain	GO Biological Process	GO:0030336	negative regulation of cell migration	471	84.71465	120	1.41652	0.02385686	0.2547771	29	61	129	2.74E-05	0.000437617
712	Age-gain	GO Biological Process	GO:0001657	ureteric bud development	1204	216.553	271	1.251426	0.05387674	0.2250831	48	75	93	2.79E-05	0.000443889
713	Age-gain	GO Biological Process	GO:0060644	mammary gland epithelial cell differentiation	347	62.41186	93	1.490101	0.01848907	0.2680115	7	11	15	2.79E-05	0.000443952
714	Age-gain	GO Biological Process	GO:0003158	endothelium development	329	59.17435	89	1.50403	0.01769384	0.2705167	11	28	47	2.82E-05	0.00044741
715	Age-gain	GO Biological Process	GO:0009749	response to glucose stimulus	509	91.54938	128	1.398153	0.02544732	0.2514735	15	34	75	2.91E-05	0.000461415
716	Age-gain	GO Biological Process	GO:0007435	salivary gland morphogenesis	172	30.93614	53	1.713207	0.01053678	0.3081395	7	19	30	2.94E-05	0.000465548
717	Age-gain	GO Biological Process	GO:0042542	response to hydrogen peroxide	352	63.31116	94	1.48473	0.01868787	0.2670455	14	34	71	2.95E-05	0.000466277
718	Age-gain	GO Biological Process	GO:0003007	heart morphogenesis	1310	235.6183	292	1.239293	0.05805169	0.2229008	63	128	195	2.97E-05	0.000468288
719	Age-gain	GO Biological Process	GO:0045619	regulation of lymphocyte differentiation	316	56.83616	86	1.513121	0.01709742	0.2721519	23	47	112	3.00E-05	0.000472412
720	Age-gain	GO Biological Process	GO:0061205	paramesonephric duct development	276	49.64171	77	1.551115	0.01530815	0.2789855	3	4	4	3.06E-05	0.000481896
721	Age-gain	GO Biological Process	GO:0042415	norepinephrine metabolic process	38	6.834728	18	2.633609	0.003578529	0.4736842	4	6	11	3.14E-05	0.000493216
722	Age-gain	GO Biological Process	GO:0046635	positive regulation of alpha-beta T cell activation	181	32.55489	55	1.689454	0.01093439	0.3038674	10	20	46	3.25E-05	0.000510455
723	Age-gain	GO Biological Process	GO:0060235	lens induction in camera-type eye	211	37.95073	62	1.633697	0.01232604	0.2938389	5	7	7	3.33E-05	0.000521216
724	Age-gain	GO Biological Process	GO:0018126	protein hydroxylation	224	40.28892	65	1.613347	0.01292247	0.2901786	2	3	4	3.35E-05	0.000523506
725	Age-gain	GO Biological Process	GO:0002317	plasma cell differentiation	6	1.079168	6	5.559841	0.001192843	1	1	1	3	3.38E-05	0.000526349
726	Age-gain	GO Biological Process	GO:0048621	post-embryonic digestive tract morphogenesis	6	1.079168	6	5.559841	0.001192843	1	1	1	1	3.38E-05	0.000526349
727	Age-gain	GO Biological Process	GO:0009746	response to hexose stimulus	511	91.9091	128	1.39268	0.02544732	0.2504892	15	36	79	3.53E-05	0.00054916
728	Age-gain	GO Biological Process	GO:0001654	eye development	2349	422.4941	495	1.171614	0.09840954	0.210728	87	191	303	3.58E-05	0.000555763
729	Age-gain	GO Biological Process	GO:0003008	system process	4460	802.1812	897	1.118201	0.17833	0.2011211	229	597	2307	3.64E-05	0.000564444
730	Age-gain	GO Biological Process	GO:0021559	trigeminal nerve development	140	25.18058	45	1.787092	0.008946322	0.3214286	4	6	6	3.64E-05	0.000564444
731	Age-gain	GO Biological Process	GO:0048858	cell projection morphogenesis	2687	483.2872	560	1.158731	0.111332	0.2084109	129	271	439	3.72E-05	0.000574594
732	Age-gain	GO Biological Process	GO:0034284	response to monosaccharide stimulus	521	93.70772	130	1.387292	0.02584493	0.2495202	16	39	83	3.73E-05	0.000576227
733	Age-gain	GO Biological Process	GO:0003006	developmental process involved in reproduction	2211	397.6732	468	1.176846	0.09304175	0.2116689	97	238	432	3.81E-05	0.000586193
734	Age-gain	GO Biological Process	GO:0034614	cellular response to reactive oxygen species	336	60.43338	90	1.489243	0.01789264	0.2678571	11	30	62	3.81E-05	0.000586193
735	Age-gain	GO Biological Process	GO:0001944	vasculature development	1949	350.5496	417	1.189561	0.08290258	0.2139559	114	274	457	3.84E-05	0.000590183
736	Age-gain	GO Biological Process	GO:0071542	dopaminergic neuron differentiation	318	57.19588	86	1.503605	0.01709742	0.2704403	7	11	12	3.85E-05	0.000590183
737	Age-gain	GO Biological Process	GO:0060134	prepulse inhibition	29	5.215977	15	2.87578	0.002982107	0.5172414	4	6	11	3.92E-05	0.000600451
738	Age-gain	GO Biological Process	GO:0001754	eye photoreceptor cell differentiation	221	39.74934	64	1.61009	0.01272366	0.2895928	12	27	41	4.10E-05	0.000626859
739	Age-gain	GO Biological Process	GO:1901214	regulation of neuron death	997	179.3217	228	1.271458	0.04532803	0.2286861	44	100	169	4.21E-05	0.000643281
740	Age-gain	GO Biological Process	GO:0048742	regulation of skeletal muscle fiber development	490	88.13202	123	1.395634	0.02445328	0.2510204	12	25	34	4.49E-05	0.000684236
741	Age-gain	GO Biological Process	GO:0061325	cell proliferation involved in outflow tract morphogenesis	49	8.813202	21	2.382789	0.00417495	0.4285714	2	2	2	4.62E-05	0.000702999
742	Age-gain	GO Biological Process	GO:0040012	regulation of locomotion	1800	323.7503	387	1.195366	0.07693837	0.215	91	237	458	4.79E-05	0.000728404
743	Age-gain	GO Biological Process	GO:1901213	regulation of transcription from RNA polymerase II promoter involved in heart development	82	14.74862	30	2.034088	0.005964215	0.3658537	5	9	11	4.98E-05	0.000756899
744	Age-gain	GO Biological Process	GO:0043523	regulation of neuron apoptotic process	985	177.1633	225	1.270014	0.04473161	0.2284264	43	96	160	5.08E-05	0.00077049
745	Age-gain	GO Biological Process	GO:0007431	salivary gland development	188	33.81392	56	1.656123	0.0111332	0.2978723	9	22	36	5.15E-05	0.000779254
746	Age-gain	GO Biological Process	GO:0060218	hematopoietic stem cell differentiation	60	10.79168	24	2.223936	0.004771372	0.4	6	8	10	5.32E-05	0.000804177
747	Age-gain	GO Biological Process	GO:0032990	cell part morphogenesis	2696	484.906	560	1.154863	0.111332	0.2077151	129	276	465	5.36E-05	0.00080879
748	Age-gain	GO Biological Process	GO:0061056	sclerotome development	36	6.475005	17	2.62548	0.003379722	0.4722222	2	2	3	5.46E-05	0.000823191
749	Age-gain	GO Biological Process	GO:0030856	regulation of epithelial cell differentiation	800	143.889	187	1.299613	0.03717694	0.23375	29	58	90	5.73E-05	0.00086183
750	Age-gain	GO Biological Process	GO:2000136	regulation of cell proliferation involved in heart morphogenesis	122	21.94307	40	1.822899	0.007952286	0.3278689	8	12	16	5.85E-05	0.000879536
751	Age-gain	GO Biological Process	GO:0048712	negative regulation of astrocyte differentiation	118	21.22363	39	1.837575	0.007753479	0.3305085	6	11	12	5.90E-05	0.000885197
752	Age-gain	GO Biological Process	GO:0008283	cell proliferation	2304	414.4003	484	1.167953	0.09622266	0.2100694	103	224	410	6.00E-05	0.000899351
753	Age-gain	GO Biological Process	GO:0003407	neural retina development	363	65.28964	95	1.455055	0.01888668	0.261708	14	25	36	6.18E-05	0.00092411
754	Age-gain	GO Biological Process	GO:0043170	macromolecule metabolic process	17720	3187.142	3306	1.037293	0.6572565	0.1865688	942	2658	5909	6.20E-05	0.000926437
755	Age-gain	GO Biological Process	GO:0061351	neural precursor cell proliferation	670	120.507	160	1.327723	0.03180915	0.238806	22	41	59	6.21E-05	0.000926437
756	Age-gain	GO Biological Process	GO:0048149	behavioral response to ethanol	30	5.395838	15	2.77992	0.002982107	0.5	1	4	10	6.53E-05	0.000973244
757	Age-gain	GO Biological Process	GO:0030901	midbrain development	452	81.29729	114	1.402261	0.02266402	0.2522124	17	26	33	6.76E-05	0.001005064
758	Age-gain	GO Biological Process	GO:0048864	stem cell development	1547	278.2454	336	1.207567	0.0667992	0.2171946	73	140	195	6.78E-05	0.001007382
759	Age-gain	GO Biological Process	GO:0060839	endothelial cell fate commitment	177	31.83544	53	1.664811	0.01053678	0.299435	3	4	5	6.91E-05	0.001024553
760	Age-gain	GO Biological Process	GO:0031061	negative regulation of histone methylation	229	41.18823	65	1.578121	0.01292247	0.2838428	3	6	12	6.97E-05	0.001032563
761	Age-gain	GO Biological Process	GO:0031589	cell-substrate adhesion	296	53.23893	80	1.50266	0.01590457	0.2702703	15	55	108	7.17E-05	0.001060023
762	Age-gain	GO Biological Process	GO:0050905	neuromuscular process	711	127.8814	168	1.313718	0.0333996	0.2362869	38	65	99	7.43E-05	0.001097406
763	Age-gain	GO Biological Process	GO:0045446	endothelial cell differentiation	292	52.51949	79	1.504204	0.01570577	0.2705479	8	25	43	7.63E-05	0.001125422
764	Age-gain	GO Biological Process	GO:0045686	negative regulation of glial cell differentiation	261	46.94379	72	1.533749	0.01431412	0.2758621	12	22	23	8.02E-05	0.0011805
765	Age-gain	GO Biological Process	GO:0060840	artery development	558	100.3626	136	1.355087	0.02703777	0.2437276	23	49	57	8.09E-05	0.001189596
766	Age-gain	GO Biological Process	GO:0010960	magnesium ion homeostasis	84	15.10835	30	1.985657	0.005964215	0.3571429	2	2	2	8.35E-05	0.001225689
767	Age-gain	GO Biological Process	GO:0072177	mesonephric duct development	302	54.3181	81	1.491216	0.01610338	0.2682119	5	9	9	8.59E-05	0.001258583
768	Age-gain	GO Biological Process	GO:0010769	regulation of cell morphogenesis involved in differentiation	1385	249.1078	303	1.216341	0.06023857	0.2187726	55	128	183	8.99E-05	0.001315212
769	Age-gain	GO Biological Process	GO:0021723	medullary reticular formation development	44	7.913895	19	2.40084	0.003777336	0.4318182	1	1	1	9.29E-05	0.001351732
770	Age-gain	GO Biological Process	GO:0048894	efferent axon development in a lateral line nerve	44	7.913895	19	2.40084	0.003777336	0.4318182	1	1	1	9.29E-05	0.001351732
771	Age-gain	GO Biological Process	GO:0061452	retrotrapezoid nucleus neuron differentiation	44	7.913895	19	2.40084	0.003777336	0.4318182	1	1	1	9.29E-05	0.001351732
772	Age-gain	GO Biological Process	GO:1901166	neural crest cell migration involved in autonomic nervous system development	44	7.913895	19	2.40084	0.003777336	0.4318182	1	1	1	9.29E-05	0.001351732
773	Age-gain	GO Biological Process	GO:0001568	blood vessel development	1896	341.0169	403	1.181759	0.08011928	0.2125527	108	260	428	9.32E-05	0.001353862
774	Age-gain	GO Biological Process	GO:0072189	ureter development	432	77.70006	109	1.40283	0.02166998	0.2523148	7	9	12	9.46E-05	0.001372048
775	Age-gain	GO Biological Process	GO:0003151	outflow tract morphogenesis	560	100.7223	136	1.350247	0.02703777	0.2428571	28	45	53	9.62E-05	0.001393231
776	Age-gain	GO Biological Process	GO:0008088	axon cargo transport	154	27.69863	47	1.696835	0.009343936	0.3051948	4	17	33	0.000104246	0.001507978
777	Age-gain	GO Biological Process	GO:0060847	endothelial cell fate specification	11	1.978474	8	4.043521	0.001590457	0.7272727	1	1	2	0.000106891	0.001541961
778	Age-gain	GO Biological Process	GO:0042058	regulation of epidermal growth factor receptor signaling pathway	85	15.28821	30	1.962297	0.005964215	0.3529412	4	16	35	0.000107055	0.001541961
779	Age-gain	GO Biological Process	GO:1901184	regulation of ERBB signaling pathway	85	15.28821	30	1.962297	0.005964215	0.3529412	4	16	38	0.000107055	0.001541961
780	Age-gain	GO Biological Process	GO:0009956	radial pattern formation	89	16.00765	31	1.936574	0.006163022	0.3483146	1	1	1	0.000109791	0.00157911
781	Age-gain	GO Biological Process	GO:0051823	regulation of synapse structural plasticity	19	3.417364	11	3.218855	0.002186879	0.5789474	1	4	7	0.000114151	0.001639473
782	Age-gain	GO Biological Process	GO:0030917	midbrain-hindbrain boundary development	138	24.82085	43	1.732414	0.008548708	0.3115942	6	8	9	0.00011954	0.001714428
783	Age-gain	GO Biological Process	GO:0090427	activation of meiosis	22	3.956948	12	3.032641	0.002385686	0.5454545	2	4	4	0.000121123	0.001734659
784	Age-gain	GO Biological Process	GO:0046530	photoreceptor cell differentiation	242	43.52642	67	1.539295	0.01332008	0.2768595	14	31	49	0.000123577	0.001767294
785	Age-gain	GO Biological Process	GO:2000679	positive regulation of transcription regulatory region DNA binding	78	14.02918	28	1.99584	0.0055666	0.3589744	4	6	7	0.000128284	0.001831999
786	Age-gain	GO Biological Process	GO:0008589	regulation of smoothened signaling pathway	370	66.54867	95	1.427527	0.01888668	0.2567568	20	32	53	0.000131579	0.001876401
787	Age-gain	GO Biological Process	GO:0048880	sensory system development	147	26.43961	45	1.701992	0.008946322	0.3061224	6	6	7	0.000133628	0.00190292
788	Age-gain	GO Biological Process	GO:0060430	lung saccule development	45	8.093757	19	2.347488	0.003777336	0.4222222	2	6	8	0.000133831	0.001903125
789	Age-gain	GO Biological Process	GO:0010594	regulation of endothelial cell migration	464	83.45562	115	1.377978	0.02286282	0.2478448	16	39	69	0.000135539	0.001924693
790	Age-gain	GO Biological Process	GO:0045663	positive regulation of myoblast differentiation	389	69.96603	99	1.414972	0.01968191	0.2544987	6	9	11	0.000137169	0.001945095
791	Age-gain	GO Biological Process	GO:0021544	subpallium development	234	42.08753	65	1.5444	0.01292247	0.2777778	13	18	23	0.000139233	0.001971591
792	Age-gain	GO Biological Process	GO:0045136	development of secondary sexual characteristics	67	12.0507	25	2.074568	0.004970179	0.3731343	4	7	15	0.000142809	0.002016548
793	Age-gain	GO Biological Process	GO:0046543	development of secondary female sexual characteristics	67	12.0507	25	2.074568	0.004970179	0.3731343	4	7	12	0.000142809	0.002016548
794	Age-gain	GO Biological Process	GO:0042421	norepinephrine biosynthetic process	35	6.295144	16	2.541642	0.003180915	0.4571429	2	3	5	0.000146047	0.002059384
795	Age-gain	GO Biological Process	GO:0030502	negative regulation of bone mineralization	156	28.05836	47	1.67508	0.009343936	0.3012821	3	6	13	0.000146664	0.00206231
796	Age-gain	GO Biological Process	GO:0070168	negative regulation of biomineral tissue development	156	28.05836	47	1.67508	0.009343936	0.3012821	3	6	15	0.000146664	0.00206231
797	Age-gain	GO Biological Process	GO:0048755	branching morphogenesis of a nerve	56	10.07223	22	2.184223	0.004373757	0.3928571	3	4	4	0.000147396	0.002069711
798	Age-gain	GO Biological Process	GO:0046634	regulation of alpha-beta T cell activation	239	42.98684	66	1.535354	0.01312127	0.2761506	13	27	59	0.000149806	0.002100625
799	Age-gain	GO Biological Process	GO:0046638	positive regulation of alpha-beta T cell differentiation	169	30.39655	50	1.644923	0.009940358	0.295858	7	16	31	0.000151365	0.00211953
800	Age-gain	GO Biological Process	GO:0010466	negative regulation of peptidase activity	508	91.36952	124	1.357127	0.02465209	0.2440945	18	56	225	0.000151969	0.002125037
801	Age-gain	GO Biological Process	GO:0035881	amacrine cell differentiation	14	2.518058	9	3.574183	0.001789264	0.6428571	1	1	2	0.00016299	0.002272827
802	Age-gain	GO Biological Process	GO:0060730	regulation of intestinal epithelial structure maintenance	14	2.518058	9	3.574183	0.001789264	0.6428571	1	1	1	0.00016299	0.002272827
803	Age-gain	GO Biological Process	GO:0042423	catecholamine biosynthetic process	111	19.9646	36	1.803192	0.007157058	0.3243243	5	8	16	0.0001709	0.002379829
804	Age-gain	GO Biological Process	GO:0045685	regulation of glial cell differentiation	500	89.93063	122	1.356601	0.02425447	0.244	23	38	44	0.000173798	0.002416844
805	Age-gain	GO Biological Process	GO:0043065	positive regulation of apoptotic process	1115	200.5453	247	1.231642	0.04910537	0.2215247	51	140	260	0.000178644	0.002477399
806	Age-gain	GO Biological Process	GO:0045580	regulation of T cell differentiation	290	52.15977	77	1.476234	0.01530815	0.2655172	20	39	87	0.000178644	0.002477399
807	Age-gain	GO Biological Process	GO:0045661	regulation of myoblast differentiation	439	78.95909	109	1.380462	0.02166998	0.2482916	10	19	26	0.000185074	0.002563028
808	Age-gain	GO Biological Process	GO:0035272	exocrine system development	241	43.34656	66	1.522612	0.01312127	0.2738589	13	30	46	0.000194442	0.002689066
809	Age-gain	GO Biological Process	GO:0043068	positive regulation of programmed cell death	1122	201.8043	248	1.228913	0.04930417	0.2210339	52	141	265	0.000199989	0.002761981
810	Age-gain	GO Biological Process	GO:0035773	insulin secretion involved in cellular response to glucose stimulus	23	4.136809	12	2.900787	0.002385686	0.5217391	1	1	3	0.000211832	0.002918357
811	Age-gain	GO Biological Process	GO:0045656	negative regulation of monocyte differentiation	20	3.597225	11	3.057913	0.002186879	0.55	1	3	5	0.000212413	0.002918357
812	Age-gain	GO Biological Process	GO:0060163	subpallium neuron fate commitment	20	3.597225	11	3.057913	0.002186879	0.55	2	2	2	0.000212413	0.002918357
813	Age-gain	GO Biological Process	GO:0035914	skeletal muscle cell differentiation	370	66.54867	94	1.4125	0.01868787	0.2540541	14	30	54	0.000212471	0.002918357
814	Age-gain	GO Biological Process	GO:0021934	hindbrain tangential cell migration	50	8.993063	20	2.223936	0.003976143	0.4	2	2	2	0.000218572	0.002998064
815	Age-gain	GO Biological Process	GO:0060037	pharyngeal system development	150	26.97919	45	1.667952	0.008946322	0.3	8	13	16	0.00022297	0.003054239
816	Age-gain	GO Biological Process	GO:0035909	aorta morphogenesis	329	59.17435	85	1.436433	0.01689861	0.2583587	10	21	22	0.00023083	0.003157609
817	Age-gain	GO Biological Process	GO:0021550	medulla oblongata development	65	11.69098	24	2.052864	0.004771372	0.3692308	3	3	3	0.00023199	0.003169167
818	Age-gain	GO Biological Process	GO:0035282	segmentation	742	133.4571	171	1.281311	0.03399602	0.2304582	33	63	87	0.0002452	0.00334509
819	Age-gain	GO Biological Process	GO:0046637	regulation of alpha-beta T cell differentiation	221	39.74934	61	1.534617	0.01212724	0.2760181	10	20	40	0.000263936	0.003595815
820	Age-gain	GO Biological Process	GO:0016486	peptide hormone processing	47	8.453479	19	2.247595	0.003777336	0.4042553	2	5	14	0.000265236	0.003608637
821	Age-gain	GO Biological Process	GO:0031324	negative regulation of cellular metabolic process	7383	1327.916	1427	1.074616	0.2836978	0.1932819	326	714	1277	0.00026694	0.003626931
822	Age-gain	GO Biological Process	GO:0009798	axis specification	704	126.6223	163	1.287293	0.03240557	0.2315341	27	54	75	0.000268206	0.003639218
823	Age-gain	GO Biological Process	GO:0021852	pyramidal neuron migration	12	2.158335	8	3.706561	0.001590457	0.6666667	1	1	1	0.000269842	0.003656481
824	Age-gain	GO Biological Process	GO:0021920	regulation of transcription from RNA polymerase II promoter involved in spinal cord association neuron specification	93	16.7271	31	1.85328	0.006163022	0.3333333	1	1	1	0.000272028	0.003677026
825	Age-gain	GO Biological Process	GO:0002762	negative regulation of myeloid leukocyte differentiation	89	16.00765	30	1.874104	0.005964215	0.3370787	6	14	32	0.000272088	0.003677026
826	Age-gain	GO Biological Process	GO:0035904	aorta development	331	59.53408	85	1.427754	0.01689861	0.2567976	10	23	24	0.000285482	0.003852854
827	Age-gain	GO Biological Process	GO:0035418	protein localization to synapse	62	11.1514	23	2.062522	0.004572565	0.3709677	5	8	10	0.000286848	0.003863066
828	Age-gain	GO Biological Process	GO:0065001	specification of axis polarity	143	25.72016	43	1.67184	0.008548708	0.3006993	2	2	4	0.000287006	0.003863066
829	Age-gain	GO Biological Process	GO:0000302	response to reactive oxygen species	411	73.92298	102	1.379815	0.02027833	0.2481752	16	46	110	0.000296878	0.00398529
830	Age-gain	GO Biological Process	GO:0060324	face development	411	73.92298	102	1.379815	0.02027833	0.2481752	17	34	43	0.000296878	0.00398529
831	Age-gain	GO Biological Process	GO:0031057	negative regulation of histone modification	290	52.15977	76	1.457062	0.01510934	0.262069	6	13	27	0.000301947	0.004047935
832	Age-gain	GO Biological Process	GO:0010842	retina layer formation	209	37.591	58	1.542922	0.01153082	0.277512	6	12	14	0.000316255	0.004234119
833	Age-gain	GO Biological Process	GO:0033131	regulation of glucokinase activity	27	4.856254	13	2.67696	0.002584493	0.4814815	2	3	8	0.000324419	0.004337655
834	Age-gain	GO Biological Process	GO:0051270	regulation of cellular component movement	1837	330.4051	386	1.168263	0.07673956	0.2101252	90	241	470	0.00033284	0.004444346
835	Age-gain	GO Biological Process	GO:0040013	negative regulation of locomotion	595	107.0174	140	1.308198	0.027833	0.2352941	35	74	149	0.000341862	0.004558768
836	Age-gain	GO Biological Process	GO:0002089	lens morphogenesis in camera-type eye	389	69.96603	97	1.386387	0.01928429	0.2493573	10	19	25	0.000344822	0.004592159
837	Age-gain	GO Biological Process	GO:0022029	telencephalon cell migration	513	92.26883	123	1.333061	0.02445328	0.2397661	17	37	48	0.000348287	0.004632166
838	Age-gain	GO Biological Process	GO:2000678	negative regulation of transcription regulatory region DNA binding	59	10.61181	22	2.073161	0.004373757	0.3728814	2	8	10	0.000354584	0.004709694
839	Age-gain	GO Biological Process	GO:0010942	positive regulation of cell death	1153	207.38	252	1.21516	0.0500994	0.2185603	55	151	280	0.000363826	0.004826092
840	Age-gain	GO Biological Process	GO:0051271	negative regulation of cellular component movement	538	96.76536	128	1.322787	0.02544732	0.2379182	30	66	136	0.000374183	0.004956933
841	Age-gain	GO Biological Process	GO:0007585	respiratory gaseous exchange	376	67.62783	94	1.38996	0.01868787	0.25	11	22	32	0.00038396	0.005079777
842	Age-gain	GO Biological Process	GO:0044763	single-organism cellular process	21096	3794.353	3887	1.024417	0.7727634	0.1842529	1309	3806	9961	0.000398969	0.005271419
843	Age-gain	GO Biological Process	GO:0010632	regulation of epithelial cell migration	510	91.72924	122	1.330001	0.02425447	0.2392157	21	53	93	0.000403902	0.005329595
844	Age-gain	GO Biological Process	GO:0072358	cardiovascular system development	3495	628.6151	701	1.11515	0.1393638	0.2005722	184	429	720	0.000408147	0.005378569
845	Age-gain	GO Biological Process	GO:0048608	reproductive structure development	1369	246.2301	294	1.194005	0.0584493	0.2147553	68	148	250	0.000413938	0.005447749
846	Age-gain	GO Biological Process	GO:0060322	head development	560	100.7223	132	1.310534	0.02624254	0.2357143	25	45	56	0.00045916	0.006035012
847	Age-gain	GO Biological Process	GO:0042475	odontogenesis of dentin-containing tooth	445	80.03826	108	1.349355	0.02147117	0.2426966	28	51	68	0.000485398	0.006371561
848	Age-gain	GO Biological Process	GO:0003203	endocardial cushion morphogenesis	142	25.5403	42	1.64446	0.008349901	0.2957746	8	14	18	0.000491447	0.006442556
849	Age-gain	GO Biological Process	GO:0097274	urea homeostasis	76	13.66946	26	1.902051	0.005168986	0.3421053	1	1	2	0.000522777	0.006817773
850	Age-gain	GO Biological Process	GO:0097275	cellular ammonia homeostasis	76	13.66946	26	1.902051	0.005168986	0.3421053	1	1	1	0.000522777	0.006817773
851	Age-gain	GO Biological Process	GO:0097276	cellular creatinine homeostasis	76	13.66946	26	1.902051	0.005168986	0.3421053	1	1	1	0.000522777	0.006817773
852	Age-gain	GO Biological Process	GO:0097277	cellular urea homeostasis	76	13.66946	26	1.902051	0.005168986	0.3421053	1	1	1	0.000522777	0.006817773
853	Age-gain	GO Biological Process	GO:0072148	epithelial cell fate commitment	351	63.1313	88	1.39392	0.01749503	0.2507123	13	16	17	0.000523496	0.006818314
854	Age-gain	GO Biological Process	GO:2001251	negative regulation of chromosome organization	300	53.95838	77	1.427026	0.01530815	0.2566667	7	16	39	0.000543126	0.007064848
855	Age-gain	GO Biological Process	GO:0000433	negative regulation of transcription from RNA polymerase II promoter by glucose	25	4.496532	12	2.668724	0.002385686	0.48	1	1	1	0.000570512	0.007373444
856	Age-gain	GO Biological Process	GO:0033132	negative regulation of glucokinase activity	25	4.496532	12	2.668724	0.002385686	0.48	1	1	4	0.000570512	0.007373444
857	Age-gain	GO Biological Process	GO:0051594	detection of glucose	25	4.496532	12	2.668724	0.002385686	0.48	1	1	2	0.000570512	0.007373444
858	Age-gain	GO Biological Process	GO:2000971	negative regulation of detection of glucose	25	4.496532	12	2.668724	0.002385686	0.48	1	1	1	0.000570512	0.007373444
859	Age-gain	GO Biological Process	GO:2000976	regulation of transcription from RNA polymerase II promoter involved in detection of glucose	25	4.496532	12	2.668724	0.002385686	0.48	1	1	1	0.000570512	0.007373444
860	Age-gain	GO Biological Process	GO:0045616	regulation of keratinocyte differentiation	57	10.25209	21	2.048362	0.00417495	0.3684211	5	12	21	0.000577333	0.007452038
861	Age-gain	GO Biological Process	GO:2000763	positive regulation of transcription from RNA polymerase II promoter involved in norepinephrine biosynthetic process	13	2.338196	8	3.421441	0.001590457	0.6153846	1	1	1	0.000590665	0.007604624
862	Age-gain	GO Biological Process	GO:2000764	positive regulation of semaphorin-plexin signaling pathway involved in outflow tract morphogenesis	13	2.338196	8	3.421441	0.001590457	0.6153846	1	1	1	0.000590665	0.007604624
863	Age-gain	GO Biological Process	GO:0010605	negative regulation of macromolecule metabolic process	7592	1365.507	1459	1.068468	0.2900596	0.192176	335	739	1309	0.000597793	0.007686558
864	Age-gain	GO Biological Process	GO:0000415	negative regulation of histone H3-K36 methylation	139	25.00072	41	1.639953	0.008151093	0.294964	1	1	1	0.000605206	0.007762057
865	Age-gain	GO Biological Process	GO:0070171	negative regulation of tooth mineralization	139	25.00072	41	1.639953	0.008151093	0.294964	1	1	2	0.000605206	0.007762057
866	Age-gain	GO Biological Process	GO:0061458	reproductive system development	1378	247.8488	294	1.186207	0.0584493	0.2133527	68	150	254	0.000637105	0.008160775
867	Age-gain	GO Biological Process	GO:0060317	cardiac epithelial to mesenchymal transition	73	13.12987	25	1.904055	0.004970179	0.3424658	6	14	20	0.000651757	0.008337857
868	Age-gain	GO Biological Process	GO:0055075	potassium ion homeostasis	77	13.84932	26	1.877349	0.005168986	0.3376623	1	2	6	0.000655816	0.008379133
869	Age-gain	GO Biological Process	GO:2000675	negative regulation of type B pancreatic cell apoptotic process	16	2.87778	9	3.127411	0.001789264	0.5625	1	2	2	0.000657456	0.008389444
870	Age-gain	GO Biological Process	GO:0048713	regulation of oligodendrocyte differentiation	302	54.3181	77	1.417575	0.01530815	0.2549669	15	22	24	0.000669168	0.008528085
871	Age-gain	GO Biological Process	GO:1902105	regulation of leukocyte differentiation	556	100.0029	130	1.299963	0.02584493	0.2338129	36	85	192	0.000707452	0.008998075
872	Age-gain	GO Biological Process	GO:0000414	regulation of histone H3-K36 methylation	140	25.18058	41	1.628239	0.008151093	0.2928571	1	2	3	0.000709198	0.008998075
873	Age-gain	GO Biological Process	GO:0055081	anion homeostasis	140	25.18058	41	1.628239	0.008151093	0.2928571	8	16	36	0.000709198	0.008998075
874	Age-gain	GO Biological Process	GO:0090049	regulation of cell migration involved in sprouting angiogenesis	106	19.06529	33	1.730894	0.006560636	0.3113208	4	8	11	0.000709622	0.008998075
875	Age-gain	GO Biological Process	GO:0043122	regulation of I-kappaB kinase/NF-kappaB cascade	493	88.6716	117	1.319475	0.02326044	0.2373225	21	59	158	0.000715762	0.009058581
876	Age-gain	GO Biological Process	GO:0001936	regulation of endothelial cell proliferation	359	64.57019	89	1.378345	0.01769384	0.2479109	13	37	65	0.000716193	0.009058581
877	Age-gain	GO Biological Process	GO:0042981	regulation of apoptotic process	3643	655.2346	725	1.106474	0.1441352	0.1990118	172	491	961	0.000757455	0.009568449
878	Age-gain	GO Biological Process	GO:0001667	ameboidal cell migration	854	153.6015	190	1.236967	0.03777336	0.2224824	39	77	119	0.000760721	0.009597669
879	Age-gain	GO Biological Process	GO:0060166	olfactory pit development	29	5.215977	13	2.492342	0.002584493	0.4482759	2	2	3	0.000767436	0.009670267
880	Age-gain	GO Biological Process	GO:0030858	positive regulation of epithelial cell differentiation	285	51.26046	73	1.4241	0.01451292	0.2561404	14	26	38	0.000790505	0.009948509
881	Age-gain	GO Biological Process	GO:0014013	regulation of gliogenesis	543	97.66466	127	1.300368	0.02524851	0.2338858	25	47	57	0.000798459	0.01
882	Age-gain	GO Biological Process	GO:0035640	exploration behavior	66	11.87084	23	1.93752	0.004572565	0.3484848	5	11	17	0.000801048	0.01
883	Age-gain	GO Biological Process	GO:0071636	positive regulation of transforming growth factor beta production	66	11.87084	23	1.93752	0.004572565	0.3484848	4	8	11	0.000801048	0.01
884	Age-gain	GO Biological Process	GO:0010830	regulation of myotube differentiation	548	98.56397	128	1.298649	0.02544732	0.2335766	16	33	53	0.000805746	0.01
885	Age-gain	GO Biological Process	GO:0050769	positive regulation of neurogenesis	835	150.1842	186	1.23848	0.03697813	0.2227545	31	78	121	0.000808306	0.01
886	Age-gain	GO Biological Process	GO:0006584	catecholamine metabolic process	128	23.02224	38	1.650578	0.007554672	0.296875	7	19	37	0.000820177	0.01
887	Age-gain	GO Biological Process	GO:0051572	negative regulation of histone H3-K4 methylation	141	25.36044	41	1.616691	0.008151093	0.2907801	1	2	4	0.000828683	0.01
888	Age-gain	GO Biological Process	GO:0050877	neurological system process	3641	654.8748	724	1.105555	0.1439364	0.1988465	178	452	2009	0.000834562	0.01
889	Age-gain	GO Biological Process	GO:0071300	cellular response to retinoic acid	380	68.34728	93	1.360698	0.01848907	0.2447368	11	22	35	0.000861981	0.01
890	Age-gain	GO Biological Process	GO:0048853	forebrain morphogenesis	199	35.79239	54	1.508701	0.01073559	0.2713568	7	10	16	0.000885858	0.01
891	Age-gain	GO Biological Process	GO:0045014	negative regulation of transcription by glucose	26	4.676393	12	2.56608	0.002385686	0.4615385	1	2	3	0.000887015	0.01
892	Age-gain	GO Biological Process	GO:0048489	synaptic vesicle transport	291	52.33963	74	1.413843	0.01471173	0.2542955	13	30	61	0.000909052	0.01
893	Age-gain	GO Biological Process	GO:0097479	synaptic vesicle localization	291	52.33963	74	1.413843	0.01471173	0.2542955	13	30	63	0.000909052	0.01
894	Age-gain	GO Biological Process	GO:0043401	steroid hormone mediated signaling pathway	506	91.0098	119	1.307552	0.02365805	0.2351779	20	36	51	0.000924672	0.01
895	Age-gain	GO Biological Process	GO:0061029	eyelid development in camera-type eye	116	20.86391	35	1.677538	0.00695825	0.3017241	5	11	11	0.00093787	0.01
896	Age-gain	GO Biological Process	GO:0031536	positive regulation of exit from mitosis	6	1.079168	5	4.633201	0.000994036	0.8333333	1	1	4	0.000958675	0.01
897	Age-gain	GO Biological Process	GO:0046671	negative regulation of retinal cell programmed cell death	6	1.079168	5	4.633201	0.000994036	0.8333333	2	2	2	0.000958675	0.01
898	Age-gain	GO Biological Process	GO:0006287	base-excision repair, gap-filling	91	16.36737	29	1.771817	0.005765408	0.3186813	2	2	7	0.000960627	0.01
899	Age-gain	GO Biological Process	GO:0045836	positive regulation of meiosis	59	10.61181	21	1.978926	0.00417495	0.3559322	5	7	10	0.000973572	0.01
900	Age-gain	GO Biological Process	GO:0043067	regulation of programmed cell death	3684	662.6089	731	1.103215	0.145328	0.1984256	175	496	973	0.000983081	0.01
901	Age-gain	GO Biological Process	GO:0021854	hypothalamus development	182	32.73475	50	1.527429	0.009940358	0.2747253	7	11	18	0.001001374	0.01
902	Age-gain	GO Biological Process	GO:0046189	phenol-containing compound biosynthetic process	125	22.48266	37	1.645713	0.007355865	0.296	6	12	27	0.001011681	0.01
903	Age-gain	GO Biological Process	GO:0055062	phosphate ion homeostasis	79	14.20904	26	1.829821	0.005168986	0.3291139	1	3	10	0.001012686	0.01
904	Age-gain	GO Biological Process	GO:0010224	response to UV-B	11	1.978474	7	3.538081	0.00139165	0.6363636	3	4	14	0.001013778	0.01
905	Age-gain	GO Biological Process	GO:0002076	osteoblast development	108	19.42502	33	1.69884	0.006560636	0.3055556	7	13	18	0.001017289	0.01
906	Age-gain	GO Biological Process	GO:0010520	regulation of reciprocal meiotic recombination	4	0.719445	4	5.559841	0.000795229	1	1	1	3	0.001045504	0.01
907	Age-gain	GO Biological Process	GO:0030221	basophil differentiation	4	0.719445	4	5.559841	0.000795229	1	1	1	2	0.001045504	0.01
908	Age-gain	GO Biological Process	GO:0045128	negative regulation of reciprocal meiotic recombination	4	0.719445	4	5.559841	0.000795229	1	1	1	1	0.001045504	0.01
909	Age-gain	GO Biological Process	GO:0045799	positive regulation of chromatin assembly or disassembly	4	0.719445	4	5.559841	0.000795229	1	1	1	2	0.001045504	0.01
910	Age-gain	GO Biological Process	GO:0048050	post-embryonic eye morphogenesis	4	0.719445	4	5.559841	0.000795229	1	1	1	4	0.001045504	0.01
911	Age-gain	GO Biological Process	GO:0060217	hemangioblast cell differentiation	4	0.719445	4	5.559841	0.000795229	1	1	1	1	0.001045504	0.01
912	Age-gain	GO Biological Process	GO:0048730	epidermis morphogenesis	147	26.43961	42	1.588526	0.008349901	0.2857143	10	22	34	0.001061516	0.01
913	Age-gain	GO Biological Process	GO:0048715	negative regulation of oligodendrocyte differentiation	117	21.04377	35	1.6632	0.00695825	0.2991453	7	11	11	0.001110082	0.01
914	Age-gain	GO Biological Process	GO:0061312	BMP signaling pathway involved in heart development	37	6.654867	15	2.25399	0.002982107	0.4054054	3	4	4	0.001112663	0.01
915	Age-gain	GO Biological Process	GO:0048892	lateral line nerve development	96	17.26668	30	1.73745	0.005964215	0.3125	4	4	5	0.001130812	0.01
916	Age-gain	GO Biological Process	GO:0001649	osteoblast differentiation	543	97.66466	126	1.290129	0.0250497	0.2320442	31	52	75	0.001141907	0.01
917	Age-gain	GO Biological Process	GO:0048523	negative regulation of cellular process	11481	2064.987	2162	1.04698	0.4298211	0.1883111	558	1386	2712	0.001144674	0.01
918	Age-gain	GO Biological Process	GO:0015721	bile acid and bile salt transport	14	2.518058	8	3.177052	0.001590457	0.5714286	1	4	10	0.001160899	0.01
919	Age-gain	GO Biological Process	GO:0010810	regulation of cell-substrate adhesion	317	57.01602	79	1.385576	0.01570577	0.2492114	23	61	102	0.001171167	0.01
920	Age-gain	GO Biological Process	GO:2000674	regulation of type B pancreatic cell apoptotic process	17	3.057641	9	2.943445	0.001789264	0.5294118	1	3	3	0.001174572	0.01
921	Age-gain	GO Biological Process	GO:0007596	blood coagulation	252	45.32504	65	1.434086	0.01292247	0.2579365	12	33	98	0.001221469	0.01
922	Age-gain	GO Biological Process	GO:1901379	regulation of potassium ion transmembrane transport	68	12.23057	23	1.880534	0.004572565	0.3382353	5	8	12	0.001275683	0.02
923	Age-gain	GO Biological Process	GO:0014014	negative regulation of gliogenesis	285	51.26046	72	1.404591	0.01431412	0.2526316	12	27	29	0.001276313	0.02
924	Age-gain	GO Biological Process	GO:0007369	gastrulation	919	165.2925	201	1.216026	0.03996024	0.218716	36	80	124	0.001314389	0.02
925	Age-gain	GO Biological Process	GO:0007599	hemostasis	253	45.5049	65	1.428418	0.01292247	0.256917	12	34	100	0.001359749	0.02
926	Age-gain	GO Biological Process	GO:0044344	cellular response to fibroblast growth factor stimulus	267	48.02296	68	1.415989	0.01351889	0.2546816	21	35	52	0.001367588	0.02
927	Age-gain	GO Biological Process	GO:0071774	response to fibroblast growth factor stimulus	267	48.02296	68	1.415989	0.01351889	0.2546816	21	35	53	0.001367588	0.02
928	Age-gain	GO Biological Process	GO:0009913	epidermal cell differentiation	580	104.3195	133	1.274929	0.02644135	0.2293103	30	57	116	0.001372534	0.02
929	Age-gain	GO Biological Process	GO:0051090	regulation of sequence-specific DNA binding transcription factor activity	1289	231.8412	273	1.17753	0.05427435	0.2117921	71	150	277	0.001512255	0.02
930	Age-gain	GO Biological Process	GO:0071634	regulation of transforming growth factor beta production	81	14.56876	26	1.78464	0.005168986	0.3209877	6	11	18	0.001526738	0.02
931	Age-gain	GO Biological Process	GO:0097070	ductus arteriosus closure	81	14.56876	26	1.78464	0.005168986	0.3209877	1	3	5	0.001526738	0.02
932	Age-gain	GO Biological Process	GO:0071214	cellular response to abiotic stimulus	646	116.1904	146	1.256558	0.02902584	0.2260062	19	61	154	0.001536027	0.02
933	Age-gain	GO Biological Process	GO:0060849	regulation of transcription involved in lymphatic endothelial cell fate commitment	163	29.31739	45	1.534925	0.008946322	0.2760736	2	2	2	0.001558822	0.02
934	Age-gain	GO Biological Process	GO:0021955	central nervous system neuron axonogenesis	363	65.28964	88	1.34784	0.01749503	0.2424242	14	25	31	0.001574827	0.02
935	Age-gain	GO Biological Process	GO:0003360	brainstem development	65	11.69098	22	1.881792	0.004373757	0.3384615	2	4	4	0.001594511	0.02
936	Age-gain	GO Biological Process	GO:0010035	response to inorganic substance	923	166.0119	201	1.210756	0.03996024	0.2177681	35	120	265	0.001628888	0.02
937	Age-gain	GO Biological Process	GO:0021942	radial glia guided migration of Purkinje cell	42	7.554173	16	2.118035	0.003180915	0.3809524	2	3	3	0.001685575	0.02
938	Age-gain	GO Biological Process	GO:0030512	negative regulation of transforming growth factor beta receptor signaling pathway	302	54.3181	75	1.380755	0.01491054	0.2483444	15	26	40	0.001693479	0.02
939	Age-gain	GO Biological Process	GO:0010941	regulation of cell death	3816	686.3506	752	1.09565	0.149503	0.197065	182	515	1010	0.001700258	0.02
940	Age-gain	GO Biological Process	GO:0001525	angiogenesis	904	162.5946	197	1.211603	0.03916501	0.2179204	63	155	268	0.00174083	0.02
941	Age-gain	GO Biological Process	GO:0007268	synaptic transmission	1287	231.4814	272	1.17504	0.05407555	0.2113442	74	170	290	0.00174123	0.02
942	Age-gain	GO Biological Process	GO:0021846	cell proliferation in forebrain	495	89.03132	115	1.29168	0.02286282	0.2323232	11	20	28	0.001742437	0.02
943	Age-gain	GO Biological Process	GO:0034599	cellular response to oxidative stress	743	133.6369	165	1.234689	0.03280318	0.2220727	20	44	100	0.001759914	0.02
944	Age-gain	GO Biological Process	GO:0007096	regulation of exit from mitosis	21	3.777086	10	2.647543	0.001988072	0.4761905	3	3	8	0.001779349	0.02
945	Age-gain	GO Biological Process	GO:0003198	epithelial to mesenchymal transition involved in endocardial cushion formation	46	8.273618	17	2.054724	0.003379722	0.3695652	2	7	10	0.001802027	0.02
946	Age-gain	GO Biological Process	GO:0055078	sodium ion homeostasis	82	14.74862	26	1.762876	0.005168986	0.3170732	1	2	8	0.001858707	0.02
947	Age-gain	GO Biological Process	GO:0003272	endocardial cushion formation	50	8.993063	18	2.001543	0.003578529	0.36	3	9	13	0.001887749	0.02
948	Age-gain	GO Biological Process	GO:0003253	cardiac neural crest cell migration involved in outflow tract morphogenesis	74	13.30973	24	1.803192	0.004771372	0.3243243	3	3	3	0.001944177	0.02
949	Age-gain	GO Biological Process	GO:0050807	regulation of synapse organization	313	56.29657	77	1.367756	0.01530815	0.2460064	19	35	54	0.001953372	0.02
950	Age-gain	GO Biological Process	GO:0008653	lipopolysaccharide metabolic process	28	5.036115	12	2.382789	0.002385686	0.4285714	3	6	8	0.001960184	0.02
951	Age-gain	GO Biological Process	GO:0035880	embryonic nail plate morphogenesis	18	3.237503	9	2.77992	0.001789264	0.5	1	2	3	0.001975871	0.02
952	Age-gain	GO Biological Process	GO:0021855	hypothalamus cell migration	58	10.43195	20	1.917187	0.003976143	0.3448276	2	2	2	0.001980525	0.02
953	Age-gain	GO Biological Process	GO:0019233	sensory perception of pain	156	28.05836	43	1.53252	0.008548708	0.275641	8	27	55	0.002017495	0.02
954	Age-gain	GO Biological Process	GO:0060678	dichotomous subdivision of terminal units involved in ureteric bud branching	12	2.158335	7	3.243241	0.00139165	0.5833333	1	1	1	0.002055289	0.02
955	Age-gain	GO Biological Process	GO:0072267	metanephric capsule specification	12	2.158335	7	3.243241	0.00139165	0.5833333	1	1	1	0.002055289	0.02
956	Age-gain	GO Biological Process	GO:0045995	regulation of embryonic development	596	107.1973	135	1.25936	0.02683897	0.2265101	37	72	93	0.002063522	0.02
957	Age-gain	GO Biological Process	GO:0070344	regulation of fat cell proliferation	39	7.014589	15	2.1384	0.002982107	0.3846154	2	4	5	0.002085196	0.02
958	Age-gain	GO Biological Process	GO:0003278	apoptotic process involved in heart morphogenesis	15	2.697919	8	2.965249	0.001590457	0.5333333	1	2	3	0.002096464	0.02
959	Age-gain	GO Biological Process	GO:0045639	positive regulation of myeloid cell differentiation	314	56.47644	77	1.3634	0.01530815	0.2452229	14	40	70	0.002139913	0.02
960	Age-gain	GO Biological Process	GO:0002011	morphogenesis of an epithelial sheet	152	27.33891	42	1.536272	0.008349901	0.2763158	5	22	33	0.002146982	0.02
961	Age-gain	GO Biological Process	GO:0009892	negative regulation of metabolic process	7811	1404.896	1488	1.059153	0.295825	0.1905006	350	782	1398	0.002150695	0.02
962	Age-gain	GO Biological Process	GO:0003091	renal water homeostasis	87	15.64793	27	1.725468	0.005367793	0.3103448	2	4	9	0.002177267	0.02
963	Age-gain	GO Biological Process	GO:0072132	mesenchyme morphogenesis	166	29.85697	45	1.507186	0.008946322	0.2710843	10	17	22	0.002306196	0.03
964	Age-gain	GO Biological Process	GO:0035993	deltoid tuberosity development	47	8.453479	17	2.011006	0.003379722	0.3617021	2	2	3	0.002356207	0.03
965	Age-gain	GO Biological Process	GO:0055067	monovalent inorganic cation homeostasis	189	33.99378	50	1.470857	0.009940358	0.2645503	7	26	61	0.002395913	0.03
966	Age-gain	GO Biological Process	GO:0008210	estrogen metabolic process	55	9.892369	19	1.920672	0.003777336	0.3454545	3	8	15	0.002478872	0.03
967	Age-gain	GO Biological Process	GO:0003357	noradrenergic neuron differentiation	92	16.54724	28	1.692126	0.0055666	0.3043478	4	5	5	0.00250917	0.03
968	Age-gain	GO Biological Process	GO:0009755	hormone-mediated signaling pathway	530	95.32647	121	1.269322	0.02405567	0.2283019	22	46	77	0.002563197	0.03
969	Age-gain	GO Biological Process	GO:0030030	cell projection organization	3166	569.4407	627	1.10108	0.1246521	0.1980417	156	375	669	0.002740499	0.03
970	Age-gain	GO Biological Process	GO:0000432	positive regulation of transcription from RNA polymerase II promoter by glucose	29	5.215977	12	2.300624	0.002385686	0.4137931	1	2	3	0.002802124	0.03
971	Age-gain	GO Biological Process	GO:0060973	cell migration involved in heart development	76	13.66946	24	1.755739	0.004771372	0.3157895	3	5	8	0.002893498	0.03
972	Age-gain	GO Biological Process	GO:0006703	estrogen biosynthetic process	44	7.913895	16	2.02176	0.003180915	0.3636364	2	5	8	0.002942372	0.03
973	Age-gain	GO Biological Process	GO:0021795	cerebral cortex cell migration	390	70.14589	92	1.311552	0.01829026	0.2358974	14	28	38	0.002972509	0.03
974	Age-gain	GO Biological Process	GO:0043589	skin morphogenesis	159	28.59794	43	1.503605	0.008548708	0.2704403	11	26	41	0.002981106	0.03
975	Age-gain	GO Biological Process	GO:0061101	neuroendocrine cell differentiation	48	8.63334	17	1.96911	0.003379722	0.3541667	5	5	6	0.003045551	0.03
976	Age-gain	GO Biological Process	GO:0050870	positive regulation of T cell activation	318	57.19588	77	1.346251	0.01530815	0.2421384	21	45	122	0.003051817	0.03
977	Age-gain	GO Biological Process	GO:0032506	cytokinetic process	19	3.417364	9	2.633609	0.001789264	0.4736842	3	4	13	0.003159085	0.04
978	Age-gain	GO Biological Process	GO:0035810	positive regulation of urine volume	85	15.28821	26	1.700657	0.005168986	0.3058824	1	6	9	0.003248246	0.04
979	Age-gain	GO Biological Process	GO:0007219	Notch signaling pathway	319	57.37574	77	1.342031	0.01530815	0.2413793	21	42	75	0.003326945	0.04
980	Age-gain	GO Biological Process	GO:0045055	regulated secretory pathway	37	6.654867	14	2.103724	0.0027833	0.3783784	3	10	30	0.003468039	0.04
981	Age-gain	GO Biological Process	GO:0060018	astrocyte fate commitment	10	1.798613	6	3.335905	0.001192843	0.6	2	2	4	0.003647992	0.04
982	Age-gain	GO Biological Process	GO:0060323	head morphogenesis	383	68.88686	90	1.30649	0.01789264	0.2349869	17	29	38	0.003669778	0.04
983	Age-gain	GO Biological Process	GO:0002074	extraocular skeletal muscle development	41	7.374312	15	2.034088	0.002982107	0.3658537	3	3	3	0.003676187	0.04
984	Age-gain	GO Biological Process	GO:0001945	lymph vessel development	202	36.33197	52	1.431246	0.01033797	0.2574257	5	13	20	0.003682652	0.04
985	Age-gain	GO Biological Process	GO:0015015	heparan sulfate proteoglycan biosynthetic process, enzymatic modification	13	2.338196	7	2.993761	0.00139165	0.5384615	2	3	4	0.003764016	0.04
986	Age-gain	GO Biological Process	GO:0032355	response to estradiol stimulus	249	44.78545	62	1.384378	0.01232604	0.248996	14	29	68	0.003767858	0.04
987	Age-gain	GO Biological Process	GO:0043086	negative regulation of catalytic activity	1207	217.0925	253	1.165402	0.05029821	0.2096106	61	190	526	0.003806216	0.04
988	Age-gain	GO Biological Process	GO:0035809	regulation of urine volume	86	15.46807	26	1.680882	0.005168986	0.3023256	1	7	13	0.003873081	0.04
989	Age-gain	GO Biological Process	GO:0046015	regulation of transcription by glucose	30	5.395838	12	2.223936	0.002385686	0.4	1	3	6	0.003914938	0.04
990	Age-gain	GO Biological Process	GO:0072488	ammonium transmembrane transport	30	5.395838	12	2.223936	0.002385686	0.4	2	2	4	0.003914938	0.04
991	Age-gain	GO Biological Process	GO:0007520	myoblast fusion	82	14.74862	25	1.695073	0.004970179	0.304878	7	9	15	0.004041886	0.04
992	Age-gain	GO Biological Process	GO:0051570	regulation of histone H3-K9 methylation	78	14.02918	24	1.71072	0.004771372	0.3076923	2	3	8	0.004207191	0.05
993	Age-gain	GO Biological Process	GO:0030225	macrophage differentiation	34	6.115283	13	2.125822	0.002584493	0.3823529	3	7	11	0.004311509	0.05
994	Age-gain	GO Biological Process	GO:0050679	positive regulation of epithelial cell proliferation	1107	199.1064	233	1.170228	0.04632207	0.2104788	43	77	116	0.004367297	0.05
995	Age-gain	GO Biological Process	GO:0008543	fibroblast growth factor receptor signaling pathway	135	24.28127	37	1.523808	0.007355865	0.2740741	13	24	36	0.004394839	0.05
996	Age-gain	GO Biological Process	GO:0033555	multicellular organismal response to stress	337	60.61324	80	1.319844	0.01590457	0.2373887	15	43	67	0.004470526	0.05
997	Age-gain	GO Biological Process	GO:0051153	regulation of striated muscle cell differentiation	780	140.2918	169	1.204632	0.03359841	0.2166667	26	48	76	0.00447137	0.05
998	Age-gain	GO Biological Process	GO:0016050	vesicle organization	294	52.87921	71	1.342683	0.01411531	0.2414966	12	40	73	0.00460148	0.05
999	Age-gain	GO Biological Process	GO:0051445	regulation of meiotic cell cycle	100	17.98613	29	1.612354	0.005765408	0.29	9	16	34	0.004633445	0.05
1000	Age-gain	GO Biological Process	GO:0043535	regulation of blood vessel endothelial cell migration	195	35.07295	50	1.4256	0.009940358	0.2564103	8	20	35	0.004710865	0.05
1001	Age-gain	GO Biological Process	GO:0072227	metanephric macula densa development	62	11.1514	20	1.793497	0.003976143	0.3225806	1	1	1	0.00476632	0.05
1002	Age-gain	GO Biological Process	GO:0072233	metanephric thick ascending limb development	62	11.1514	20	1.793497	0.003976143	0.3225806	1	1	2	0.00476632	0.05
1003	Age-gain	GO Biological Process	GO:0072240	metanephric DCT cell differentiation	62	11.1514	20	1.793497	0.003976143	0.3225806	1	1	1	0.00476632	0.05
1004	Age-gain	GO Biological Process	GO:0007088	regulation of mitosis	214	38.49031	54	1.402951	0.01073559	0.2523364	19	42	77	0.00488075	0.05
1005	Age-gain	GO Biological Process	GO:0010463	mesenchymal cell proliferation	96	17.26668	28	1.62162	0.0055666	0.2916667	8	12	13	0.004890807	0.05
1006	Age-gain	GO Biological Process	GO:0035518	histone H2A monoubiquitination	154	27.69863	41	1.480217	0.008151093	0.2662338	1	5	7	0.004939833	0.05
1007	Age-gain	GO Cellular Component	GO:0005634	nucleus	18640	3352.614	3593	1.071701	0.7143141	0.1927575	955	2566	5357	6.07E-16	7.32E-13
1008	Age-gain	GO Cellular Component	GO:0033588	Elongator holoenzyme complex	57	10.25209	34	3.316396	0.006759443	0.5964912	1	1	6	2.82E-12	1.70E-09
1009	Age-gain	GO Cellular Component	GO:0005667	transcription factor complex	2972	534.5477	673	1.259008	0.1337972	0.2264468	108	191	319	5.62E-12	2.26E-09
1010	Age-gain	GO Cellular Component	GO:0030123	AP-3 adaptor complex	92	16.54724	40	2.417322	0.007952286	0.4347826	1	2	4	1.28E-08	3.85E-06
1011	Age-gain	GO Cellular Component	GO:0043227	membrane-bounded organelle	22086	3972.416	4113	1.03539	0.8176938	0.1862266	1337	3963	9119	2.94E-08	7.08E-06
1012	Age-gain	GO Cellular Component	GO:0043231	intracellular membrane-bounded organelle	22053	3966.48	4106	1.035175	0.8163022	0.1861878	1333	3949	9085	3.95E-08	7.94E-06
1013	Age-gain	GO Cellular Component	GO:0034451	centriolar satellite	238	42.80698	75	1.752051	0.01491054	0.3151261	2	6	9	2.84E-07	4.89E-05
1014	Age-gain	GO Cellular Component	GO:0005790	smooth endoplasmic reticulum	50	8.993063	24	2.668724	0.004771372	0.48	4	7	12	1.16E-06	0.000174143
1015	Age-gain	GO Cellular Component	GO:0043229	intracellular organelle	22986	4134.291	4237	1.024843	0.8423459	0.1843296	1461	4374	10165	1.29E-05	0.001726046
1016	Age-gain	GO Cellular Component	GO:0043226	organelle	23004	4137.528	4238	1.024283	0.8425447	0.1842288	1463	4386	10194	1.89E-05	0.002277121
1017	Age-gain	GO Cellular Component	GO:0030119	AP-type membrane coat adaptor complex	181	32.55489	53	1.62802	0.01053678	0.2928177	7	19	37	0.000131138	0.01
1018	Age-gain	MSigDB Pathway	REACTOME_BASE_EXCISION_REPAIR	Genes involved in Base Excision Repair	76	13.66946	41	2.999388	0.008151093	0.5394737	2	4	19	1.67E-12	5.51E-10
1019	Age-gain	MSigDB Pathway	REACTOME_BASE_FREE_SUGAR_PHOSPHATE_REMOVAL_VIA_THE_SINGLE_NUCLEOTIDE_REPLACEMENT_PATHWAY	Genes involved in Base-free sugar-phosphate removal via the single-nucleotide replacement pathway	76	13.66946	41	2.999388	0.008151093	0.5394737	2	4	10	1.67E-12	5.51E-10
1020	Age-gain	MSigDB Pathway	REACTOME_RESOLUTION_OF_AP_SITES_VIA_THE_MULTIPLE_NUCLEOTIDE_PATCH_REPLACEMENT_PATHWAY	Genes involved in Resolution of AP sites via the multiple-nucleotide patch replacement pathway	76	13.66946	41	2.999388	0.008151093	0.5394737	2	4	17	1.67E-12	5.51E-10
1021	Age-gain	MSigDB Pathway	REACTOME_RESOLUTION_OF_AP_SITES_VIA_THE_SINGLE_NUCLEOTIDE_REPLACEMENT_PATHWAY	Genes involved in Resolution of AP sites via the single-nucleotide replacement pathway	76	13.66946	41	2.999388	0.008151093	0.5394737	2	4	12	1.67E-12	5.51E-10
1022	Age-gain	MSigDB Pathway	KEGG_MATURITY_ONSET_DIABETES_OF_THE_YOUNG	Maturity onset diabetes of the young	308	55.39727	104	1.877349	0.02067594	0.3376623	13	19	24	1.90E-11	5.00E-09
1023	Age-gain	MSigDB Pathway	KEGG_BASE_EXCISION_REPAIR	Base excision repair	147	26.43961	59	2.231501	0.01172962	0.4013605	3	8	33	2.52E-10	5.53E-08
1024	Age-gain	MSigDB Pathway	REACTOME_REGULATION_OF_GENE_EXPRESSION_IN_BETA_CELLS	Genes involved in Regulation of gene expression in beta cells	259	46.58407	88	1.889058	0.01749503	0.3397683	9	13	19	4.55E-10	7.79E-08
1025	Age-gain	MSigDB Pathway	REACTOME_SYNTHESIS_SECRETION_AND_INACTIVATION_OF_GLP1	Genes involved in Synthesis, Secretion, and Inactivation of Glucagon-like Peptide-1 (GLP-1)	128	23.02224	53	2.302122	0.01053678	0.4140625	5	8	17	5.27E-10	7.79E-08
1026	Age-gain	MSigDB Pathway	REACTOME_INCRETIN_SYNTHESIS_SECRETION_AND_INACTIVATION	Genes involved in Incretin Synthesis, Secretion, and Inactivation	153	27.51877	60	2.18033	0.01192843	0.3921569	7	10	20	5.31E-10	7.79E-08
1027	Age-gain	MSigDB Pathway	REACTOME_POST_CHAPERONIN_TUBULIN_FOLDING_PATHWAY	Genes involved in Post-chaperonin tubulin folding pathway	116	20.86391	46	2.204765	0.009145129	0.3965517	1	3	16	3.52E-08	4.64E-06
1028	Age-gain	MSigDB Pathway	REACTOME_REGULATION_OF_BETA_CELL_DEVELOPMENT	Genes involved in Regulation of beta-cell development	390	70.14589	113	1.610928	0.02246521	0.2897436	15	21	29	6.01E-08	7.21E-06
1029	Age-gain	MSigDB Pathway	REACTOME_SYNTHESIS_SECRETION_AND_INACTIVATION_OF_GIP	Genes involved in Synthesis, Secretion, and Inactivation of Glucose-dependent Insulinotropic Polypeptide (GIP)	127	22.84238	48	2.101357	0.009542744	0.3779528	3	6	13	1.05E-07	1.15E-05
1030	Age-gain	MSigDB Pathway	REACTOME_PROTEIN_FOLDING	Genes involved in Protein folding	208	37.41114	67	1.79091	0.01332008	0.3221154	8	18	48	4.92E-07	4.99E-05
1031	Age-gain	MSigDB Pathway	REACTOME_REGULATION_OF_INSULIN_SECRETION	Genes involved in Regulation of Insulin Secretion	273	49.10212	81	1.649623	0.01610338	0.2967033	17	39	86	1.52E-06	0.000142975
1032	Age-gain	MSigDB Pathway	WNT_SIGNALING	Genes related to Wnt-mediated signal transduction	484	87.05285	128	1.470371	0.02544732	0.2644628	32	59	87	2.08E-06	0.000183052
1033	Age-gain	MSigDB Pathway	PID_WNT_SIGNALING_PATHWAY	Wnt signaling network	134	24.10141	45	1.867111	0.008946322	0.3358209	11	17	28	1.05E-05	0.000867557
1034	Age-gain	MSigDB Pathway	REACTOME_INTEGRATION_OF_ENERGY_METABOLISM	Genes involved in Integration of energy metabolism	321	57.73546	86	1.489552	0.01709742	0.2679128	21	47	113	5.54E-05	0.004296731
1035	Age-gain	MSigDB Pathway	PID_HNF3BPATHWAY	FOXA2 and FOXA3 transcription factor networks	141	25.36044	44	1.734986	0.008747515	0.3120567	9	21	43	9.66E-05	0.007075699
1036	Age-gain	MSigDB Pathway	REACTOME_SIGNALING_BY_FGFR3_MUTANTS	Genes involved in Signaling by FGFR3 mutants	49	8.813202	20	2.269323	0.003976143	0.4081633	7	8	11	0.000157605	0.01
1037	Age-gain	MSigDB Pathway	PID_HIF1APATHWAY	Hypoxic and oxygen homeostasis regulation of HIF-1-alpha	245	44.06601	67	1.520446	0.01332008	0.2734694	3	8	17	0.000182817	0.01
1038	Age-gain	MSigDB Pathway	REACTOME_SYNTHESIS_OF_VERY_LONG_CHAIN_FATTY_ACYL_COAS	Genes involved in Synthesis of very long-chain fatty acyl-CoAs	29	5.215977	14	2.684061	0.0027833	0.4827586	1	3	14	0.000184904	0.01
1039	Age-gain	MSigDB Pathway	KEGG_HEDGEHOG_SIGNALING_PATHWAY	Hedgehog signaling pathway	374	67.26811	95	1.412259	0.01888668	0.2540107	26	40	54	0.000198643	0.01
1040	Age-gain	MSigDB Pathway	REACTOME_TRANS_GOLGI_NETWORK_VESICLE_BUDDING	Genes involved in trans-Golgi Network Vesicle Budding	214	38.49031	58	1.506873	0.01153082	0.271028	11	20	52	0.000605781	0.03
1041	Age-gain	MSigDB Pathway	KEGG_BIOSYNTHESIS_OF_UNSATURATED_FATTY_ACIDS	Biosynthesis of unsaturated fatty acids	36	6.475005	15	2.3166	0.002982107	0.4166667	2	5	19	0.000792152	0.04
1042	Age-gain	MSigDB Predicted Promoter Motifs	TGATTTRY_V$GFI1_01	Motif TGATTTRY matches GFI1: growth factor independent 1	2692	484.1865	836	1.726607	0.1662028	0.3105498	106	179	270	5.86E-68	3.60E-65
1043	Age-gain	MSigDB Predicted Promoter Motifs	V$TST1_01	Motif NNKGAATTAVAVTDN matches POU3F1: POU domain, class 3, transcription factor 1	2709	487.2442	818	1.67883	0.1626243	0.3019564	90	172	235	2.23E-60	6.85E-58
1044	Age-gain	MSigDB Predicted Promoter Motifs	V$MEIS1BHOXA9_01	Motif TGACAGTTTTAYGR matches MEIS1: Meis1, myeloid ecotropic viral integration site 1 homolog (mouse)&lt;br&gt; HOXA9: homeobox A9	1519	273.2093	491	1.797157	0.09761431	0.323239	52	95	135	5.25E-44	1.08E-41
1045	Age-gain	MSigDB Predicted Promoter Motifs	CATRRAGC_UNKNOWN	Motif CATRRAGC (no known TF)	1087	195.5092	382	1.953872	0.07594433	0.3514259	39	81	121	2.77E-43	4.25E-41
1046	Age-gain	MSigDB Predicted Promoter Motifs	AACTTT_UNKNOWN	Motif AACTTT (no known TF)	12140	2183.516	2609	1.194862	0.5186879	0.2149094	528	1179	1748	1.17E-40	1.44E-38
1047	Age-gain	MSigDB Predicted Promoter Motifs	TAATTA_V$CHX10_01	Motif TAATTA matches VSX1: visual system homeobox 1 homolog, CHX10-like (zebrafish)	5870	1055.786	1410	1.335498	0.2803181	0.2402044	231	484	737	7.61E-40	7.80E-38
1048	Age-gain	MSigDB Predicted Promoter Motifs	V$MSX1_01	Motif CNGTAWNTG matches MSX1: msh homeobox homolog 1 (Drosophila)	1805	324.6496	546	1.681813	0.1085487	0.3024931	70	120	164	1.27E-39	1.11E-37
1049	Age-gain	MSigDB Predicted Promoter Motifs	CTTTGT_V$LEF1_Q2	Motif CTTTGT matches LEF1: lymphoid enhancer-binding factor 1	10370	1865.161	2269	1.216517	0.4510934	0.2188042	468	1147	1802	2.91E-38	2.24E-36
1050	Age-gain	MSigDB Predicted Promoter Motifs	V$NKX25_01	Motif TYAAGTG matches NKX2-5: NK2 transcription factor related, locus 5 (Drosophila)	1460	262.5974	457	1.740306	0.09085487	0.3130137	47	81	115	5.22E-37	3.56E-35
1051	Age-gain	MSigDB Predicted Promoter Motifs	RACTNNRTTTNC_UNKNOWN	Motif RACTNNRTTTNC (no known TF)	785	141.1911	289	2.046871	0.05745527	0.3681529	22	57	104	5.78E-37	3.56E-35
1052	Age-gain	MSigDB Predicted Promoter Motifs	V$CHX10_01	Motif NNNTAATTAGCNNN matches VSX1: visual system homeobox 1 homolog, CHX10-like (zebrafish)	2353	423.2135	654	1.545319	0.1300199	0.2779431	85	150	209	7.65E-35	4.28E-33
1053	Age-gain	MSigDB Predicted Promoter Motifs	V$SRF_Q6	Motif GNCCAWATAWGGMN matches SRF: serum response factor (c-fos serum response element-binding transcription factor)	1542	277.3461	461	1.662183	0.0916501	0.2989624	67	145	228	4.90E-32	2.51E-30
1054	Age-gain	MSigDB Predicted Promoter Motifs	YNTTTNNNANGCARM_UNKNOWN	Motif YNTTTNNNANGCARM (no known TF)	733	131.8383	262	1.987283	0.05208748	0.3574352	23	45	65	3.55E-31	1.68E-29
1055	Age-gain	MSigDB Predicted Promoter Motifs	V$PAX_Q6	Motif CTGGAACTMAC matches PAX2: paired box gene 2	2095	376.8093	583	1.547202	0.1159046	0.2782816	73	147	237	4.35E-31	1.91E-29
1056	Age-gain	MSigDB Predicted Promoter Motifs	V$NCX_01	Motif NNGTAAKTNG matches TLX2: T-cell leukemia homeobox 2	1610	289.5766	473	1.633419	0.09403579	0.2937888	63	126	161	6.56E-31	2.69E-29
1057	Age-gain	MSigDB Predicted Promoter Motifs	V$PAX4_02	Motif NAAWAATTANS matches PAX4: paired box gene 4	2769	498.0358	727	1.459734	0.1445328	0.2625497	95	159	224	2.27E-30	8.74E-29
1058	Age-gain	MSigDB Predicted Promoter Motifs	V$OCT1_05	Motif MKVATTTGCATATT matches POU2F1: POU domain, class 2, transcription factor 1	2124	382.0253	584	1.528694	0.1161034	0.2749529	74	160	229	1.21E-29	4.38E-28
1059	Age-gain	MSigDB Predicted Promoter Motifs	GGGAGGRR_V$MAZ_Q6	Motif GGGAGGRR matches MAZ: MYC-associated zinc finger protein (purine-binding transcription factor)	10610	1908.328	2258	1.183235	0.4489066	0.2128181	525	1279	2092	5.08E-29	1.74E-27
1060	Age-gain	MSigDB Predicted Promoter Motifs	V$POU6F1_01	Motif GCATAAWTTAT matches POU6F1: POU domain, class 6, transcription factor 1	2769	498.0358	719	1.443671	0.1429423	0.2596605	97	164	220	1.74E-28	5.63E-27
1061	Age-gain	MSigDB Predicted Promoter Motifs	V$TEF_Q6	Motif ATGTTWAYATAA matches TEF: thyrotrophic embryonic factor	2296	412.9615	616	1.491665	0.1224652	0.2682927	83	159	222	3.40E-28	1.04E-26
1062	Age-gain	MSigDB Predicted Promoter Motifs	V$SREBP_Q3	Motif VNNVTCACCCYA (no known TF)	1786	321.2322	502	1.562732	0.09980119	0.281075	63	148	234	8.64E-28	2.53E-26
1063	Age-gain	MSigDB Predicted Promoter Motifs	V$OCT1_Q5_01	Motif TNATTTGCATW matches POU2F1: POU domain, class 2, transcription factor 1	1669	300.1884	474	1.579008	0.09423459	0.2840024	66	142	246	2.59E-27	7.24E-26
1064	Age-gain	MSigDB Predicted Promoter Motifs	V$MYCMAX_B	Motif GCCAYGYGSN matches MYC: v-myc myelocytomatosis viral oncogene homolog (avian)&lt;br&gt; MAX: MYC associated factor X	1498	269.4322	435	1.614507	0.08648111	0.2903872	62	159	236	2.98E-27	7.97E-26
1065	Age-gain	MSigDB Predicted Promoter Motifs	WGTTNNNNNAAA_UNKNOWN	Motif WGTTNNNNNAAA (no known TF)	4408	792.8284	1052	1.326895	0.2091451	0.238657	161	344	490	3.80E-27	9.73E-26
1066	Age-gain	MSigDB Predicted Promoter Motifs	CTTTGA_V$LEF1_Q2	Motif CTTTGA matches LEF1: lymphoid enhancer-binding factor 1	7180	1291.404	1598	1.237413	0.3176938	0.2225627	317	706	1109	4.17E-27	1.03E-25
1067	Age-gain	MSigDB Predicted Promoter Motifs	V$IK2_01	Motif NNNTGGGAWNNC (no known TF)	1760	316.5558	491	1.551069	0.09761431	0.2789773	89	175	253	2.20E-26	5.04E-25
1068	Age-gain	MSigDB Predicted Promoter Motifs	V$MYCMAX_03	Motif NNNNNNNCACGTGNNNNNNN matches MYC: v-myc myelocytomatosis viral oncogene homolog (avian)&lt;br&gt; MAX: MYC associated factor X	1072	192.8113	333	1.727077	0.06620278	0.3106343	51	131	232	2.22E-26	5.04E-25
1069	Age-gain	MSigDB Predicted Promoter Motifs	V$CDX2_Q5	Motif ANANTTTTATKRCC matches CDX2: caudal type homeobox transcription factor 2	2832	509.3671	723	1.419409	0.1437376	0.2552966	108	183	226	2.29E-26	5.04E-25
1070	Age-gain	MSigDB Predicted Promoter Motifs	V$VDR_Q6	Motif CNSNNTGAACCN matches VDR: vitamin D (1,25- dihydroxyvitamin D3) receptor	1544	277.7058	442	1.591613	0.08787276	0.2862694	74	168	243	2.94E-26	6.24E-25
1071	Age-gain	MSigDB Predicted Promoter Motifs	V$NKX3A_01	Motif NWATAAGTATWT matches NKX3-1: NK3 transcription factor related, locus 1 (Drosophila)	2616	470.5171	676	1.436717	0.1343936	0.2584098	79	145	207	4.25E-26	8.72E-25
1072	Age-gain	MSigDB Predicted Promoter Motifs	V$SREBP1_Q6	Motif CACSCCA matches SREBF1: sterol regulatory element binding transcription factor 1	1789	321.7718	494	1.53525	0.09821074	0.2761319	76	156	228	1.81E-25	3.58E-24
1073	Age-gain	MSigDB Predicted Promoter Motifs	V$OCT1_04	Motif NNNNNNNWATGCAAATNNNWNNA matches POU2F1: POU domain, class 2, transcription factor 1	3054	549.2963	765	1.392691	0.1520875	0.2504912	89	160	209	2.29E-25	4.41E-24
1074	Age-gain	MSigDB Predicted Promoter Motifs	V$GR_Q6_01	Motif NNTGTYCT matches NR3C1: nuclear receptor subfamily 3, group C, member 1 (glucocorticoid receptor)	2018	362.96	543	1.496033	0.1079523	0.2690783	74	150	242	4.07E-25	7.58E-24
1075	Age-gain	MSigDB Predicted Promoter Motifs	V$GATA_C	Motif NGATAAGNMNN matches GATA1: GATA binding protein 1 (globin transcription factor 1)	1825	328.2468	500	1.523244	0.09940358	0.2739726	73	140	241	5.85E-25	1.06E-23
1076	Age-gain	MSigDB Predicted Promoter Motifs	V$TBP_01	Motif TATAAATW matches TBP: TATA box binding protein	1441	259.1801	414	1.597345	0.08230616	0.2873005	64	130	225	6.02E-25	1.06E-23
1077	Age-gain	MSigDB Predicted Promoter Motifs	V$HNF1_Q6	Motif WRGTTAATNATTAACNNN matches TCF1: transcription factor 1, hepatic; LF-B1, hepatic nuclear factor (HNF1), albumin proximal factor	2178	391.7378	574	1.465266	0.1141153	0.2635445	69	142	228	3.23E-24	5.53E-23
1078	Age-gain	MSigDB Predicted Promoter Motifs	V$PPAR_DR1_Q2	Motif TGACCTTTGNCCY matches PPARA: peroxisome proliferative activated receptor, alpha	1073	192.9911	326	1.689197	0.06481113	0.3038211	60	140	240	4.83E-24	8.03E-23
1079	Age-gain	MSigDB Predicted Promoter Motifs	V$HNF1_C	Motif DGTTAATKAWTNACCAM matches TCF1: transcription factor 1, hepatic; LF-B1, hepatic nuclear factor (HNF1), albumin proximal factor	2099	377.5288	556	1.472735	0.1105368	0.264888	62	144	220	5.36E-24	8.67E-23
1080	Age-gain	MSigDB Predicted Promoter Motifs	V$HNF6_Q6	Motif HWAAATCAATAW matches ONECUT1: one cut domain, family member 1	2641	475.0136	671	1.412591	0.1333996	0.2540704	96	175	217	8.13E-24	1.28E-22
1081	Age-gain	MSigDB Predicted Promoter Motifs	V$P53_DECAMER_Q2	Motif RGRCAWGNCY matches TP53: tumor protein p53 (Li-Fraumeni syndrome)	1511	271.7704	425	1.56382	0.08449304	0.2812707	61	147	237	1.30E-23	2.00E-22
1082	Age-gain	MSigDB Predicted Promoter Motifs	TTGTTT_V$FOXO4_01	Motif TTGTTT matches MLLT7: myeloid/lymphoid or mixed-lineage leukemia (trithorax homolog, Drosophila); translocated to, 7	11063	1989.805	2304	1.157902	0.4580517	0.2082618	470	1175	1868	1.53E-23	2.30E-22
1083	Age-gain	MSigDB Predicted Promoter Motifs	V$P300_01	Motif NNNGGGAGTNNNNS matches PCAF: p300/CBP-associated factor	1738	312.5989	473	1.513121	0.09403579	0.2721519	75	147	231	5.71E-23	8.35E-22
1084	Age-gain	MSigDB Predicted Promoter Motifs	CCAWWNAAGG_V$SRF_Q4	Motif CCAWWNAAGG matches SRF: serum response factor (c-fos serum response element-binding transcription factor)	625	112.4133	214	1.90369	0.04254473	0.3424	22	46	83	6.24E-23	8.92E-22
1085	Age-gain	MSigDB Predicted Promoter Motifs	V$SRF_Q5_01	Motif CCAWATAWGGMNMNG matches SRF: serum response factor (c-fos serum response element-binding transcription factor)	1469	264.2162	413	1.563114	0.08210736	0.2811436	61	127	205	6.43E-23	8.98E-22
1086	Age-gain	MSigDB Predicted Promoter Motifs	V$NKX62_Q2	Motif NWADTAAWTANN matches NKX6-2: NK6 transcription factor related, locus 2 (Drosophila)	2460	442.4587	628	1.419342	0.1248509	0.2552846	96	164	222	8.57E-23	1.17E-21
1087	Age-gain	MSigDB Predicted Promoter Motifs	RGTTAMWNATT_V$HNF1_01	Motif RGTTAMWNATT matches TCF1: transcription factor 1, hepatic; LF-B1, hepatic nuclear factor (HNF1), albumin proximal factor	405	72.84381	155	2.12784	0.03081511	0.382716	12	36	67	2.86E-22	3.82E-21
1088	Age-gain	MSigDB Predicted Promoter Motifs	V$TCF4_Q5	Motif SCTTTGAW matches TCF4: transcription factor 4	1928	346.7725	511	1.473589	0.1015905	0.2650415	81	154	220	4.12E-22	5.40E-21
1089	Age-gain	MSigDB Predicted Promoter Motifs	TGGAAA_V$NFAT_Q4_01	Motif TGGAAA matches NFAT&lt;br&gt; NFATC	8760	1575.585	1865	1.183688	0.3707753	0.2128995	406	1014	1710	4.46E-22	5.72E-21
1090	Age-gain	MSigDB Predicted Promoter Motifs	RACCACAR_V$AML_Q6	Motif RACCACAR matches RUNX1: runt-related transcription factor 1 (acute myeloid leukemia 1; aml1 oncogene)	1570	282.3822	431	1.5263	0.08568588	0.2745223	53	131	238	9.95E-22	1.25E-20
1091	Age-gain	MSigDB Predicted Promoter Motifs	V$TFIII_Q6	Motif RGAGGKAGG matches GTF2A1: general transcription factor IIA, 1, 19/37kDa&lt;br&gt; GTF2A2: general transcription factor IIA, 2, 12kDa	1955	351.6288	515	1.464613	0.1023857	0.2634271	71	135	191	1.12E-21	1.38E-20
1092	Age-gain	MSigDB Predicted Promoter Motifs	V$AFP1_Q6	Motif ATTAAYTRCAC matches ZHX2: zinc fingers and homeoboxes 2	2742	493.1796	681	1.380836	0.1353877	0.2483589	83	165	234	1.78E-21	2.15E-20
1093	Age-gain	MSigDB Predicted Promoter Motifs	RTTTNNNYTGGM_UNKNOWN	Motif RTTTNNNYTGGM (no known TF)	1691	304.1454	456	1.499283	0.09065606	0.2696629	47	101	137	2.61E-21	3.08E-20
1094	Age-gain	MSigDB Predicted Promoter Motifs	V$IK1_01	Motif NHNTGGGAATRCC (no known TF)	1843	331.4843	489	1.475183	0.0972167	0.2653283	78	171	257	2.86E-21	3.32E-20
1095	Age-gain	MSigDB Predicted Promoter Motifs	CCAWNWWNNNGGC_UNKNOWN	Motif CCAWNWWNNNGGC (no known TF)	639	114.9313	213	1.85328	0.04234592	0.3333333	26	55	78	3.24E-21	3.69E-20
1096	Age-gain	MSigDB Predicted Promoter Motifs	V$PR_01	Motif NNNNNNGGNACRNNNTGTTCTNNNNNN matches PGR: progesterone receptor	1158	208.2793	336	1.613218	0.0667992	0.2901554	50	86	137	4.10E-21	4.58E-20
1097	Age-gain	MSigDB Predicted Promoter Motifs	YATTNATC_UNKNOWN	Motif YATTNATC (no known TF)	2823	507.7483	696	1.370758	0.1383698	0.2465462	100	228	344	4.20E-21	4.61E-20
1098	Age-gain	MSigDB Predicted Promoter Motifs	V$OSF2_Q6	Motif ACCACANM matches RUNX2: runt-related transcription factor 2	1573	282.9218	429	1.51632	0.08528827	0.2727273	68	161	239	4.72E-21	5.09E-20
1099	Age-gain	MSigDB Predicted Promoter Motifs	V$HNF4ALPHA_Q6	Motif VTGAACTTTGMMB matches HNF4A: hepatocyte nuclear factor 4, alpha	1847	332.2037	487	1.465968	0.09681909	0.2636708	83	161	245	1.35E-20	1.43E-19
1100	Age-gain	MSigDB Predicted Promoter Motifs	V$POU3F2_02	Motif TTATGYTAAT matches POU3F2: POU domain, class 3, transcription factor 2	2412	433.8254	607	1.399181	0.1206759	0.2516584	75	163	237	1.75E-20	1.83E-19
1101	Age-gain	MSigDB Predicted Promoter Motifs	V$TTF1_Q6	Motif NNNNCAAGNRNN matches TITF1: thyroid transcription factor 1	1753	315.2968	466	1.477973	0.09264414	0.26583	76	163	237	1.86E-20	1.91E-19
1102	Age-gain	MSigDB Predicted Promoter Motifs	CAGCTG_V$AP4_Q5	Motif CAGCTG matches REPIN1: replication initiator 1	6351	1142.299	1394	1.220346	0.2771372	0.219493	317	768	1372	2.39E-20	2.38E-19
1103	Age-gain	MSigDB Predicted Promoter Motifs	GGATTA_V$PITX2_Q2	Motif GGATTA matches PITX2: paired-like homeodomain transcription factor 2	3851	692.6457	902	1.302253	0.1793241	0.2342249	144	356	540	2.40E-20	2.38E-19
1104	Age-gain	MSigDB Predicted Promoter Motifs	GGGTGGRR_V$PAX4_03	Motif GGGTGGRR matches PAX4: paired box gene 4	5433	977.1862	1215	1.243366	0.2415507	0.2236334	293	712	1200	3.05E-20	2.98E-19
1105	Age-gain	MSigDB Predicted Promoter Motifs	V$NKX25_02	Motif CWTAATTG matches NKX2-5: NK2 transcription factor related, locus 5 (Drosophila)	2139	384.7232	548	1.424401	0.1089463	0.2561945	79	173	238	3.18E-20	3.06E-19
1106	Age-gain	MSigDB Predicted Promoter Motifs	CTGRYYYNATT_UNKNOWN	Motif CTGRYYYNATT (no known TF)	376	67.62783	142	2.099727	0.02823062	0.3776596	15	32	63	6.67E-20	6.31E-19
1107	Age-gain	MSigDB Predicted Promoter Motifs	YTAATTAA_V$LHX3_01	Motif YTAATTAA matches LHX3: LIM homeobox 3	2165	389.3996	552	1.417567	0.1097416	0.2549654	70	126	176	6.78E-20	6.32E-19
1108	Age-gain	MSigDB Predicted Promoter Motifs	V$MYCMAX_02	Motif NANCACGTGNNW matches MYC: v-myc myelocytomatosis viral oncogene homolog (avian)&lt;br&gt; MAX: MYC associated factor X	1545	277.8856	418	1.504216	0.08310139	0.2705502	71	157	246	7.52E-20	6.90E-19
1109	Age-gain	MSigDB Predicted Promoter Motifs	V$CACCCBINDINGFACTOR_Q6	Motif CANCCNNWGGGTGDGG (no known TF)	1985	357.0246	511	1.431274	0.1015905	0.2574307	82	170	253	2.56E-19	2.32E-18
1110	Age-gain	MSigDB Predicted Promoter Motifs	TATAAA_V$TATA_01	Motif TATAAA matches TAF&lt;br&gt; TATA	6021	1082.945	1323	1.221669	0.2630219	0.2197309	278	639	1159	2.62E-19	2.34E-18
1111	Age-gain	MSigDB Predicted Promoter Motifs	V$OCT1_06	Motif CWNAWTKWSATRYN matches POU2F1: POU domain, class 2, transcription factor 1	2764	497.1365	673	1.353753	0.1337972	0.2434877	87	174	242	5.14E-19	4.51E-18
1112	Age-gain	MSigDB Predicted Promoter Motifs	V$TITF1_Q3	Motif WCTCAAGTGT matches TITF1: thyroid transcription factor 1	2370	426.2712	590	1.384095	0.1172962	0.2489451	77	156	218	8.20E-19	7.10E-18
1113	Age-gain	MSigDB Predicted Promoter Motifs	GCGSCMNTTT_UNKNOWN	Motif GCGSCMNTTT (no known TF)	525	94.42716	178	1.885051	0.03538767	0.3390476	18	47	63	8.72E-19	7.45E-18
1114	Age-gain	MSigDB Predicted Promoter Motifs	V$OCT_C	Motif CTNATTTGCATAY (no known TF)	1634	293.8933	433	1.473324	0.0860835	0.2649939	65	147	234	8.85E-19	7.45E-18
1115	Age-gain	MSigDB Predicted Promoter Motifs	V$IRF1_Q6	Motif TTCACTT matches IRF1: interferon regulatory factor 1	2624	471.9559	641	1.358178	0.1274354	0.2442835	73	157	238	1.93E-18	1.61E-17
1116	Age-gain	MSigDB Predicted Promoter Motifs	V$HOXA4_Q2	Motif AWAATTRG matches HOXA4: homeobox A4	2218	398.9323	555	1.391214	0.110338	0.2502254	84	167	247	3.46E-18	2.84E-17
1117	Age-gain	MSigDB Predicted Promoter Motifs	V$STAT1_02	Motif CANTTCCS matches STAT1: signal transducer and activator of transcription 1, 91kDa	1072	192.8113	305	1.581858	0.06063618	0.2845149	47	124	230	6.41E-18	5.19E-17
1118	Age-gain	MSigDB Predicted Promoter Motifs	RRAGTTGT_UNKNOWN	Motif RRAGTTGT (no known TF)	1917	344.794	490	1.421138	0.09741551	0.2556077	76	147	226	6.50E-18	5.19E-17
1119	Age-gain	MSigDB Predicted Promoter Motifs	V$ZIC3_01	Motif NGGGKGGTC matches ZIC3: Zic family member 3 heterotaxy 1 (odd-paired homolog, Drosophila)	1756	315.8364	455	1.440619	0.09045726	0.2591116	75	146	231	8.66E-18	6.83E-17
1120	Age-gain	MSigDB Predicted Promoter Motifs	V$STAT1_03	Motif NNTTTCCN matches STAT1: signal transducer and activator of transcription 1, 91kDa	1232	221.5891	340	1.534372	0.06759443	0.275974	52	134	225	1.16E-17	9.00E-17
1121	Age-gain	MSigDB Predicted Promoter Motifs	V$CDP_01	Motif CCAATAATCGAT matches CUTL1: cut-like 1, CCAAT displacement protein (Drosophila)	799	143.7091	241	1.676998	0.04791252	0.301627	33	63	82	1.29E-17	9.92E-17
1122	Age-gain	MSigDB Predicted Promoter Motifs	V$EFC_Q6	Motif MGTTACYAGGCAAM matches RFX1: regulatory factor X, 1 (influences HLA class II expression)	1921	345.5135	489	1.415285	0.0972167	0.2545549	72	151	245	1.61E-17	1.22E-16
1123	Age-gain	MSigDB Predicted Promoter Motifs	V$CDPCR3_01	Motif CACCRATANNTATBG matches CUTL1: cut-like 1, CCAAT displacement protein (Drosophila)	464	83.45562	159	1.905204	0.03161034	0.3426724	22	46	52	2.09E-17	1.56E-16
1124	Age-gain	MSigDB Predicted Promoter Motifs	V$S8_01	Motif WNNANYYAATTANCNN matches PRRX2: paired related homeobox 2	2632	473.3948	637	1.3456	0.1266402	0.2420213	94	166	231	2.22E-17	1.64E-16
1125	Age-gain	MSigDB Predicted Promoter Motifs	V$COMP1_01	Motif NVTNWTGATTGACNACAAVARRBN matches MYOG: myogenin (myogenic factor 4)	1547	278.2454	408	1.466332	0.08111332	0.2637363	48	82	104	2.30E-17	1.69E-16
1126	Age-gain	MSigDB Predicted Promoter Motifs	V$HNF4_DR1_Q3	Motif TGAMCTTTGNCCN matches HNF4A: hepatocyte nuclear factor 4, alpha	1015	182.5592	290	1.588526	0.05765408	0.2857143	52	144	242	2.34E-17	1.70E-16
1127	Age-gain	MSigDB Predicted Promoter Motifs	TAAYNRNNTCC_UNKNOWN	Motif TAAYNRNNTCC (no known TF)	1276	229.503	348	1.51632	0.06918489	0.2727273	53	106	153	3.24E-17	2.32E-16
1128	Age-gain	MSigDB Predicted Promoter Motifs	V$NFAT_Q6	Motif NANWGGAAAANN matches NFAT&lt;br&gt; NFATC	1700	305.7641	440	1.439018	0.08747515	0.2588235	66	137	228	3.92E-17	2.77E-16
1129	Age-gain	MSigDB Predicted Promoter Motifs	V$MAF_Q6	Motif TRGRRGGAAGTKKSST matches MAF: v-maf musculoaponeurotic fibrosarcoma oncogene homolog (avian)	2047	368.176	512	1.390639	0.1017893	0.2501221	74	161	240	9.06E-17	6.33E-16
1130	Age-gain	MSigDB Predicted Promoter Motifs	V$GATA4_Q3	Motif AGATADMAGGGA matches GATA4: GATA binding protein 4	2576	463.3226	622	1.342477	0.1236581	0.2414596	80	155	227	9.56E-17	6.61E-16
1131	Age-gain	MSigDB Predicted Promoter Motifs	V$NKX61_01	Motif TWTTTAATTGGTT matches NKX6-1: NK6 transcription factor related, locus 1 (Drosophila)	2732	491.381	654	1.330943	0.1300199	0.2393851	90	162	220	9.83E-17	6.72E-16
1132	Age-gain	MSigDB Predicted Promoter Motifs	V$AHRARNT_01	Motif KNNKNNTYGCGTGCMS matches AHR: aryl hydrocarbon receptor	1935	348.0315	487	1.399298	0.09681909	0.2516796	59	99	129	1.72E-16	1.17E-15
1133	Age-gain	MSigDB Predicted Promoter Motifs	V$CACBINDINGPROTEIN_Q6	Motif GRGGSTGGG (no known TF)	1381	248.3884	368	1.481551	0.07316103	0.2664736	60	152	221	1.81E-16	1.21E-15
1134	Age-gain	MSigDB Predicted Promoter Motifs	V$PBX1_01	Motif ANCAATCAW matches PBX1: pre-B-cell leukemia transcription factor 1	1881	338.319	475	1.404	0.0944334	0.2525253	73	154	227	2.27E-16	1.50E-15
1135	Age-gain	MSigDB Predicted Promoter Motifs	V$PIT1_Q6	Motif NMTTCATAAWTATWNMNA matches POU1F1: POU domain, class 1, transcription factor 1 (Pit1, growth hormone factor 1)	2280	410.0837	558	1.360698	0.1109344	0.2447368	76	156	206	3.08E-16	2.02E-15
1136	Age-gain	MSigDB Predicted Promoter Motifs	YATGNWAAT_V$OCT_C	Motif YATGNWAAT (no known TF)	2658	478.0712	636	1.330346	0.1264414	0.2392777	90	211	327	3.13E-16	2.02E-15
1137	Age-gain	MSigDB Predicted Promoter Motifs	V$CRX_Q4	Motif YNNNTAATCYCMN matches CRX: cone-rod homeobox	2517	452.7108	606	1.338603	0.1204771	0.2407628	81	164	247	4.77E-16	3.06E-15
1138	Age-gain	MSigDB Predicted Promoter Motifs	V$AP2_Q6_01	Motif SNNNCCNCAGGCN matches GTF3A: general transcription factor IIIA	1738	312.5989	443	1.417152	0.08807157	0.2548907	87	176	249	4.96E-16	3.14E-15
1139	Age-gain	MSigDB Predicted Promoter Motifs	V$PBX1_02	Motif NNCATCAATCAANNW matches PBX1: pre-B-cell leukemia transcription factor 1	1276	229.503	343	1.494534	0.06819085	0.2688088	46	89	115	5.40E-16	3.39E-15
1140	Age-gain	MSigDB Predicted Promoter Motifs	V$ARNT_02	Motif NNNNNRTCACGTGAYNNNNN matches ARNT: aryl hydrocarbon receptor nuclear translocator	1075	193.3509	298	1.54124	0.05924453	0.2772093	48	124	230	6.99E-16	4.34E-15
1141	Age-gain	MSigDB Predicted Promoter Motifs	V$GFI1_01	Motif NNNNNNNAAATCACWGYNNNNNNN matches GFI1: growth factor independent 1	2378	427.7101	576	1.346707	0.1145129	0.2422204	78	173	249	8.31E-16	5.11E-15
1142	Age-gain	MSigDB Predicted Promoter Motifs	V$WHN_B	Motif ANNGACGCTNN matches FOXN1: forkhead box N1	1821	327.5274	459	1.40141	0.09125249	0.2520593	75	167	234	1.07E-15	6.54E-15
1143	Age-gain	MSigDB Predicted Promoter Motifs	V$RREB1_01	Motif CCCCAAACMMCCCC matches RREB1: ras responsive element binding protein 1	1881	338.319	470	1.389221	0.09343936	0.2498671	71	142	190	2.33E-15	1.40E-14
1144	Age-gain	MSigDB Predicted Promoter Motifs	V$POU1F1_Q6	Motif ATGAATAAWT matches POU1F1: POU domain, class 1, transcription factor 1 (Pit1, growth hormone factor 1)	2058	370.1545	507	1.369698	0.1007952	0.2463557	68	152	210	2.46E-15	1.47E-14
1145	Age-gain	MSigDB Predicted Promoter Motifs	V$CP2_01	Motif GCHCDAMCCAG matches TFCP2: transcription factor CP2	1456	261.878	379	1.447239	0.07534791	0.2603022	68	161	246	2.91E-15	1.72E-14
1146	Age-gain	MSigDB Predicted Promoter Motifs	V$CEBP_C	Motif NGWVTKNKGYAAKNSAYA matches CEBPA: CCAAT/enhancer binding protein (C/EBP), alpha	1286	231.3016	342	1.478589	0.06799205	0.2659409	62	134	186	3.07E-15	1.80E-14
1147	Age-gain	MSigDB Predicted Promoter Motifs	V$MZF1_02	Motif KNNNKAGGGGNAA (no known TF)	2186	393.1767	532	1.353081	0.1057654	0.2433669	77	166	215	5.01E-15	2.91E-14
1148	Age-gain	MSigDB Predicted Promoter Motifs	V$SRY_01	Motif AAACWAM matches SRY: sex determining region Y	1681	302.3468	426	1.408978	0.08469185	0.2534206	55	136	203	5.14E-15	2.96E-14
1149	Age-gain	MSigDB Predicted Promoter Motifs	GAANYNYGACNY_UNKNOWN	Motif GAANYNYGACNY (no known TF)	523	94.06744	167	1.775322	0.0332008	0.3193117	24	39	67	5.50E-15	3.13E-14
1150	Age-gain	MSigDB Predicted Promoter Motifs	V$MTF1_Q4	Motif TBTGCACHCGGCCC matches MTF1: metal-regulatory transcription factor 1	1283	230.762	340	1.47338	0.06759443	0.2650039	77	163	229	6.29E-15	3.55E-14
1151	Age-gain	MSigDB Predicted Promoter Motifs	V$SREBP1_01	Motif NATCACGTGAY matches SREBF1: sterol regulatory element binding transcription factor 1	663	119.248	200	1.677177	0.03976143	0.3016591	30	77	160	7.72E-15	4.32E-14
1152	Age-gain	MSigDB Predicted Promoter Motifs	V$PAX3_B	Motif NNNNNNCGTCACGSTYNNNNN matches PAX3: paired box gene 3 (Waardenburg syndrome 1)	893	160.6161	253	1.575185	0.05029821	0.2833147	29	64	83	7.98E-15	4.42E-14
1153	Age-gain	MSigDB Predicted Promoter Motifs	V$TATA_01	Motif STATAAAWRNNNNNN matches TAF&lt;br&gt; TATA	1091	196.2286	297	1.513541	0.05904573	0.2722273	51	119	232	9.83E-15	5.40E-14
1154	Age-gain	MSigDB Predicted Promoter Motifs	V$GRE_C	Motif GGTACAANNTGTYCTK matches NR3C1: nuclear receptor subfamily 3, group C, member 1 (glucocorticoid receptor)	1024	184.1779	282	1.531128	0.05606362	0.2753906	45	86	116	1.05E-14	5.69E-14
1155	Age-gain	MSigDB Predicted Promoter Motifs	CAGGTG_V$E12_Q6	Motif CAGGTG matches TCF3: transcription factor 3 (E2A immunoglobulin enhancer binding factors E12/E47)	9952	1789.979	2027	1.132415	0.4029821	0.2036777	493	1264	2274	1.09E-14	5.88E-14
1156	Age-gain	MSigDB Predicted Promoter Motifs	V$MZF1_01	Motif NGNGGGGA (no known TF)	1570	282.3822	400	1.41652	0.07952286	0.2547771	72	145	215	1.60E-14	8.57E-14
1157	Age-gain	MSigDB Predicted Promoter Motifs	V$HMGIY_Q6	Motif GGAAAWT matches HMGA1: high mobility group AT-hook 1	2095	376.8093	510	1.35347	0.1013917	0.2434368	60	132	231	1.88E-14	9.99E-14
1158	Age-gain	MSigDB Predicted Promoter Motifs	V$NFY_Q6_01	Motif NNNNRRCCAATSR (no known TF)	1021	183.6383	280	1.524736	0.055666	0.2742409	52	136	243	2.26E-14	1.19E-13
1159	Age-gain	MSigDB Predicted Promoter Motifs	V$COUP_DR1_Q6	Motif TGACCTTTGACCC matches PITX2: paired-like homeodomain transcription factor 2	1098	197.4877	297	1.503891	0.05904573	0.2704918	49	126	226	2.35E-14	1.22E-13
1160	Age-gain	MSigDB Predicted Promoter Motifs	V$OCT1_01	Motif NNNNWTATGCAAATNTNNN matches POU2F1: POU domain, class 2, transcription factor 1	2744	493.5393	642	1.300808	0.1276342	0.233965	77	166	242	2.90E-14	1.50E-13
1161	Age-gain	MSigDB Predicted Promoter Motifs	V$GR_01	Motif NNNNNNNGKACNNNNTGTTCTNNNNNN matches NR3C1: nuclear receptor subfamily 3, group C, member 1 (glucocorticoid receptor)	1475	265.2954	377	1.421058	0.0749503	0.2555932	62	126	186	5.96E-14	3.06E-13
1162	Age-gain	MSigDB Predicted Promoter Motifs	V$NERF_Q2	Motif YRNCAGGAAGYRNSTBDS matches ELF2: E74-like factor 2 (ets domain transcription factor)	1161	208.8189	309	1.479751	0.06143141	0.2661499	42	121	227	6.43E-14	3.27E-13
1163	Age-gain	MSigDB Predicted Promoter Motifs	V$AR_Q2	Motif AGWACATNWTGTTCT matches AR: androgen receptor (dihydrotestosterone receptor; testicular feminization; spinal and bulbar muscular atrophy; Kennedy disease)	1301	233.9995	339	1.448721	0.06739563	0.2605688	45	81	116	8.08E-14	4.07E-13
1164	Age-gain	MSigDB Predicted Promoter Motifs	V$PAX4_03	Motif NNNNNYCACCCB matches PAX4: paired box gene 4	1961	352.7079	478	1.355229	0.09502982	0.2437532	70	161	231	1.10E-13	5.51E-13
1165	Age-gain	MSigDB Predicted Promoter Motifs	V$SMAD3_Q6	Motif TGTCTGTCT matches SMAD3: SMAD, mothers against DPP homolog 3 (Drosophila)	2233	401.6302	534	1.329581	0.106163	0.2391402	77	162	220	1.21E-13	6.01E-13
1166	Age-gain	MSigDB Predicted Promoter Motifs	V$PAX2_02	Motif NNNAAASNN matches PAX2: paired box gene 2	2182	392.4573	523	1.332629	0.1039761	0.2396884	89	167	240	1.49E-13	7.31E-13
1167	Age-gain	MSigDB Predicted Promoter Motifs	V$AP4_Q6	Motif CWCAGCTGGN matches TFAP4: transcription factor AP-4 (activating enhancer binding protein 4)	1046	188.1349	282	1.498925	0.05606362	0.2695985	59	121	204	1.66E-13	8.12E-13
1168	Age-gain	MSigDB Predicted Promoter Motifs	V$CDC5_01	Motif GATTTAACATAA matches CDC5L: CDC5 cell division cycle 5-like (S. pombe)	2478	445.6962	583	1.308066	0.1159046	0.2352704	90	165	231	1.89E-13	9.14E-13
1169	Age-gain	MSigDB Predicted Promoter Motifs	AACYNNNNTTCCS_UNKNOWN	Motif AACYNNNNTTCCS (no known TF)	810	145.6876	229	1.571856	0.04552684	0.282716	22	48	88	1.97E-13	9.45E-13
1170	Age-gain	MSigDB Predicted Promoter Motifs	V$HTF_01	Motif NNWWWWNGMCACGTCATYNYWNNN (no known TF)	811	145.8675	229	1.569918	0.04552684	0.2823674	22	43	64	2.26E-13	1.08E-12
1171	Age-gain	MSigDB Predicted Promoter Motifs	SYATTGTG_UNKNOWN	Motif SYATTGTG (no known TF)	1559	280.4037	392	1.397984	0.07793241	0.2514432	61	133	201	2.32E-13	1.10E-12
1172	Age-gain	MSigDB Predicted Promoter Motifs	V$BRN2_01	Motif NNCATNSRWAATNMRN matches POU3F2: POU domain, class 3, transcription factor 2	1826	328.4267	448	1.364079	0.08906561	0.245345	67	154	213	2.46E-13	1.15E-12
1173	Age-gain	MSigDB Predicted Promoter Motifs	TNCATNTCCYR_UNKNOWN	Motif TNCATNTCCYR (no known TF)	907	163.1342	250	1.532481	0.04970179	0.275634	24	53	114	3.21E-13	1.50E-12
1174	Age-gain	MSigDB Predicted Promoter Motifs	V$FREAC4_01	Motif CTWAWGTAAACANWGN matches FOXD1: forkhead box D1	1446	260.0794	367	1.411108	0.07296223	0.2538036	49	99	141	3.70E-13	1.71E-12
1175	Age-gain	MSigDB Predicted Promoter Motifs	V$TCF1P_Q6	Motif GKCRGKTT matches TCF1: transcription factor 1, hepatic; LF-B1, hepatic nuclear factor (HNF1), albumin proximal factor	1948	350.3697	472	1.347148	0.09383698	0.2422998	74	160	239	4.41E-13	2.02E-12
1176	Age-gain	MSigDB Predicted Promoter Motifs	V$SRF_Q4	Motif SCCAWATAWGGMNMNNNN matches SRF: serum response factor (c-fos serum response element-binding transcription factor)	1649	296.5912	409	1.379002	0.08131213	0.2480291	65	136	211	5.70E-13	2.60E-12
1177	Age-gain	MSigDB Predicted Promoter Motifs	TTANTCA_UNKNOWN	Motif TTANTCA (no known TF)	5565	1000.928	1186	1.184901	0.2357853	0.2131177	215	547	856	7.11E-13	3.22E-12
1178	Age-gain	MSigDB Predicted Promoter Motifs	V$SRF_C	Motif DCCWTATATGGNCWN matches SRF: serum response factor (c-fos serum response element-binding transcription factor)	1410	253.6044	357	1.407704	0.07097416	0.2531915	49	124	199	1.11E-12	5.00E-12
1179	Age-gain	MSigDB Predicted Promoter Motifs	WWTAAGGC_UNKNOWN	Motif WWTAAGGC (no known TF)	1081	194.43	286	1.470966	0.05685885	0.2645698	43	85	132	1.21E-12	5.38E-12
1180	Age-gain	MSigDB Predicted Promoter Motifs	RGAGGAARY_V$PU1_Q6	Motif RGAGGAARY matches SPI1: spleen focus forming virus (SFFV) proviral integration oncogene spi1	2044	367.6364	489	1.330119	0.0972167	0.2392368	102	250	466	1.40E-12	6.18E-12
1181	Age-gain	MSigDB Predicted Promoter Motifs	V$FREAC2_01	Motif NNANNGTAAACAANNN matches FOXF2: forkhead box F2	2383	428.6094	558	1.301885	0.1109344	0.2341586	94	177	237	1.60E-12	7.03E-12
1182	Age-gain	MSigDB Predicted Promoter Motifs	V$ZIC2_01	Motif KGGGTGGTC matches ZIC2: Zic family member 2 (odd-paired homolog, Drosophila)	1477	265.6551	370	1.392783	0.07355865	0.2505078	74	154	226	1.95E-12	8.52E-12
1183	Age-gain	MSigDB Predicted Promoter Motifs	V$HNF4_01_B	Motif NRGGNCAAAGGTCAN matches HNF4A: hepatocyte nuclear factor 4, alpha	1338	240.6544	340	1.412815	0.06759443	0.2541106	58	132	232	2.44E-12	1.06E-11
1184	Age-gain	MSigDB Predicted Promoter Motifs	WYAAANNRNNNGCG_UNKNOWN	Motif WYAAANNRNNNGCG (no known TF)	622	111.8737	182	1.626834	0.0361829	0.2926045	26	49	60	2.48E-12	1.07E-11
1185	Age-gain	MSigDB Predicted Promoter Motifs	V$NKX22_01	Motif TTAAGTRSTT matches NKX2-2: NK2 transcription factor related, locus 2 (Drosophila)	1642	295.3322	404	1.367951	0.08031809	0.2460414	61	111	167	2.68E-12	1.15E-11
1186	Age-gain	MSigDB Predicted Promoter Motifs	V$LYF1_01	Motif TTTGGGAGR (no known TF)	1811	325.7287	439	1.347747	0.08727634	0.2424075	63	164	243	2.95E-12	1.25E-11
1187	Age-gain	MSigDB Predicted Promoter Motifs	V$CEBP_Q3	Motif NNNTKNNGNAAN matches CEBPA: CCAAT/enhancer binding protein (C/EBP), alpha	2280	410.0837	535	1.304612	0.1063618	0.2346491	71	158	229	3.43E-12	1.44E-11
1188	Age-gain	MSigDB Predicted Promoter Motifs	V$STAT6_01	Motif NAWTTCCN matches STAT6: signal transducer and activator of transcription 6, interleukin-4 induced	2174	391.0184	513	1.311959	0.1019881	0.2359706	69	153	237	3.95E-12	1.65E-11
1189	Age-gain	MSigDB Predicted Promoter Motifs	V$EVI1_04	Motif DGATADGAHWAGATA matches EVI1: ecotropic viral integration site 1	2500	449.6532	579	1.287659	0.1151093	0.2316	80	167	221	4.33E-12	1.80E-11
1190	Age-gain	MSigDB Predicted Promoter Motifs	V$CDPCR1_01	Motif NATCGATCGS matches CUTL1: cut-like 1, CCAAT displacement protein (Drosophila)	1334	239.9349	337	1.404548	0.06699801	0.2526237	48	94	119	6.70E-12	2.76E-11
1191	Age-gain	MSigDB Predicted Promoter Motifs	V$AP4_01	Motif WGARYCAGCTGYGGNCNK matches TFAP4: transcription factor AP-4 (activating enhancer binding protein 4)	1754	315.4767	425	1.347168	0.08449304	0.2423033	68	160	240	7.23E-12	2.96E-11
1192	Age-gain	MSigDB Predicted Promoter Motifs	V$GR_Q6	Motif NNNNNNCNNTNTGTNCTNN matches NR3C1: nuclear receptor subfamily 3, group C, member 1 (glucocorticoid receptor)	1979	355.9454	471	1.323237	0.09363817	0.237999	69	157	234	8.70E-12	3.54E-11
1193	Age-gain	MSigDB Predicted Promoter Motifs	V$GNCF_01	Motif NTCAAGKTCAAGKTCANN matches NR6A1: nuclear receptor subfamily 6, group A, member 1	776	139.5723	215	1.54042	0.04274354	0.2770619	25	44	66	8.87E-12	3.59E-11
1194	Age-gain	MSigDB Predicted Promoter Motifs	V$OCT1_Q6	Motif NNNNATGCAAATNAN matches POU2F1: POU domain, class 2, transcription factor 1	1951	350.9093	465	1.325129	0.09244533	0.2383393	72	151	240	9.57E-12	3.85E-11
1195	Age-gain	MSigDB Predicted Promoter Motifs	CAGGTA_V$AREB6_01	Motif CAGGTA matches TCF8: transcription factor 8 (represses interleukin 2 expression)	4369	785.8138	945	1.202575	0.1878728	0.2162966	187	444	712	1.23E-11	4.92E-11
1196	Age-gain	MSigDB Predicted Promoter Motifs	WTTGKCTG_UNKNOWN	Motif WTTGKCTG (no known TF)	3477	625.3776	770	1.231256	0.1530815	0.2214553	135	301	470	1.50E-11	5.95E-11
1197	Age-gain	MSigDB Predicted Promoter Motifs	CCCNNGGGAR_V$OLF1_01	Motif CCCNNGGGAR matches EBF2: early B-cell factor 2	1992	358.2836	472	1.317392	0.09383698	0.2369478	84	187	291	1.66E-11	6.55E-11
1198	Age-gain	MSigDB Predicted Promoter Motifs	V$FREAC3_01	Motif NNNNNGTAAATAAACA matches FOXC1: forkhead box C1	2795	502.7122	634	1.261159	0.1260437	0.2268336	93	163	225	1.90E-11	7.45E-11
1199	Age-gain	MSigDB Predicted Promoter Motifs	V$OCT_Q6	Motif TNATTTGCATN (no known TF)	1536	276.2669	377	1.364622	0.0749503	0.2454427	61	138	238	2.13E-11	8.29E-11
1200	Age-gain	MSigDB Predicted Promoter Motifs	V$PR_Q2	Motif NWNAGRACAN matches NR3C1: nuclear receptor subfamily 3, group C, member 1 (glucocorticoid receptor)	1743	313.4982	420	1.339721	0.08349901	0.2409639	72	158	237	2.20E-11	8.50E-11
1201	Age-gain	MSigDB Predicted Promoter Motifs	V$GATA6_01	Motif NNNGATWANN matches GATA6: GATA binding protein 6	2069	372.1329	487	1.308672	0.09681909	0.2353794	95	158	248	2.21E-11	8.51E-11
1202	Age-gain	MSigDB Predicted Promoter Motifs	AAANWWTGC_UNKNOWN	Motif AAANWWTGC (no known TF)	2131	383.2843	499	1.301906	0.09920477	0.2341624	81	141	188	2.82E-11	1.08E-10
1203	Age-gain	MSigDB Predicted Promoter Motifs	V$IRF7_01	Motif TNSGAAWNCGAAANTNNN matches IRF7: interferon regulatory factor 7	2041	367.0968	480	1.307557	0.09542744	0.2351788	69	148	235	3.58E-11	1.36E-10
1204	Age-gain	MSigDB Predicted Promoter Motifs	V$LEF1_Q6	Motif SWWCAAAGGG matches LEF1: lymphoid enhancer-binding factor 1&lt;br&gt; TCF1: transcription factor 1, hepatic; LF-B1, hepatic nuclear factor (HNF1), albumin proximal factor	1658	298.21	401	1.34469	0.07972167	0.2418577	76	158	241	3.86E-11	1.46E-10
1205	Age-gain	MSigDB Predicted Promoter Motifs	V$CHOP_01	Motif NNRTGCAATMCCC matches DDIT3: DNA-damage-inducible transcript 3&lt;br&gt; CEBPA DIFF GENES	1957	351.9885	462	1.312543	0.09184891	0.2360756	68	154	220	4.90E-11	1.84E-10
1206	Age-gain	MSigDB Predicted Promoter Motifs	RTAAACA_V$FREAC2_01	Motif RTAAACA matches FOXF2: forkhead box F2	5527	994.0932	1162	1.168905	0.2310139	0.2102406	246	561	848	5.65E-11	2.11E-10
1207	Age-gain	MSigDB Predicted Promoter Motifs	V$MAZR_01	Motif NSGGGGGGGGMCN (no known TF)	1443	259.5398	355	1.367806	0.07057654	0.2460152	57	139	208	6.29E-11	2.33E-10
1208	Age-gain	MSigDB Predicted Promoter Motifs	V$HNF1_01	Motif GGTTAATNWTTAMCN matches TCF1: transcription factor 1, hepatic; LF-B1, hepatic nuclear factor (HNF1), albumin proximal factor	1532	275.5475	373	1.353669	0.07415507	0.2434726	54	125	218	8.11E-11	2.99E-10
1209	Age-gain	MSigDB Predicted Promoter Motifs	V$ELF1_Q6	Motif RNWMBAGGAART matches ELF1: E74-like factor 1 (ets domain transcription factor)	790	142.0904	213	1.499046	0.04234592	0.2696203	36	101	221	1.62E-10	5.93E-10
1210	Age-gain	MSigDB Predicted Promoter Motifs	V$TFIIA_Q6	Motif TMTRWRAGGRSS matches GTF2A1: general transcription factor IIA, 1, 19/37kDa&lt;br&gt; GTF2A2: general transcription factor IIA, 2, 12kDa	1739	312.7787	414	1.323619	0.08230616	0.2380679	74	150	236	1.71E-10	6.23E-10
1211	Age-gain	MSigDB Predicted Promoter Motifs	V$USF_Q6_01	Motif NRCCACGTGASN (no known TF)	947	170.3286	247	1.450138	0.04910537	0.2608237	53	122	219	1.94E-10	7.02E-10
1212	Age-gain	MSigDB Predicted Promoter Motifs	V$PU1_Q6	Motif WGAGGAAG matches SPI1: spleen focus forming virus (SFFV) proviral integration oncogene spi1	1068	192.0918	273	1.421195	0.05427435	0.255618	39	113	217	2.02E-10	7.26E-10
1213	Age-gain	MSigDB Predicted Promoter Motifs	V$CIZ_01	Motif SAAAAANNN matches ZNF384: zinc finger protein 384	2464	443.1781	560	1.2636	0.111332	0.2272727	85	161	219	2.51E-10	8.98E-10
1214	Age-gain	MSigDB Predicted Promoter Motifs	V$TATA_C	Motif NCTATAAAAR matches TAF&lt;br&gt; TATA	2004	360.442	467	1.295632	0.09284294	0.2330339	78	171	262	2.68E-10	9.52E-10
1215	Age-gain	MSigDB Predicted Promoter Motifs	V$SP1_Q2_01	Motif CCCCGCCCCN matches SP1: Sp1 transcription factor	1590	285.9794	382	1.335761	0.07594433	0.2402516	74	144	229	2.81E-10	9.91E-10
1216	Age-gain	MSigDB Predicted Promoter Motifs	V$EN1_01	Motif GTANTNN matches EN1: engrailed homolog 1	1432	257.5613	349	1.355017	0.0693837	0.2437151	45	85	105	3.01E-10	1.06E-09
1217	Age-gain	MSigDB Predicted Promoter Motifs	GGGCGGR_V$SP1_Q6	Motif GGGCGGR matches SP1: Sp1 transcription factor	10674	1919.839	2112	1.100092	0.4198807	0.197864	543	1477	2689	4.80E-10	1.68E-09
1218	Age-gain	MSigDB Predicted Promoter Motifs	V$USF_01	Motif NNRYCACGTGRYNN (no known TF)	877	157.7383	230	1.458111	0.04572565	0.2622577	47	130	239	4.84E-10	1.68E-09
1219	Age-gain	MSigDB Predicted Promoter Motifs	V$HNF3B_01	Motif KGNANTRTTTRYTTW matches FOXA2: forkhead box A2	2222	399.6517	509	1.273609	0.1011928	0.2290729	76	141	197	5.60E-10	1.94E-09
1220	Age-gain	MSigDB Predicted Promoter Motifs	V$SOX9_B1	Motif NNNNAACAATRGNN matches SOX9: SRY (sex determining region Y)-box 9 (campomelic dysplasia, autosomal sex-reversal)	1923	345.8732	448	1.295272	0.08906561	0.2329693	66	156	217	6.67E-10	2.29E-09
1221	Age-gain	MSigDB Predicted Promoter Motifs	V$AHR_Q5	Motif NTNGCGTGNNN matches AHR: aryl hydrocarbon receptor	1456	261.878	351	1.340319	0.06978131	0.2410714	57	136	197	1.03E-09	3.51E-09
1222	Age-gain	MSigDB Predicted Promoter Motifs	V$MAX_01	Motif NNANCACGTGNTNN matches MAX: MYC associated factor X	1175	211.337	292	1.38168	0.05805169	0.2485106	52	136	236	1.13E-09	3.83E-09
1223	Age-gain	MSigDB Predicted Promoter Motifs	V$HNF4_01	Motif NNNRGGNCAAAGKTCANNN matches HNF4A: hepatocyte nuclear factor 4, alpha	1194	214.7543	296	1.378319	0.05884692	0.2479062	55	146	248	1.13E-09	3.83E-09
1224	Age-gain	MSigDB Predicted Promoter Motifs	V$STAT3_02	Motif NNNTTCCN matches STAT3: signal transducer and activator of transcription 3 (acute-phase response factor)	1119	201.2648	280	1.391202	0.055666	0.2502234	43	91	134	1.21E-09	4.07E-09
1225	Age-gain	MSigDB Predicted Promoter Motifs	V$NRF1_Q6	Motif CGCATGCGCR matches NRF1: nuclear respiratory factor 1	748	134.5362	200	1.486588	0.03976143	0.2673797	47	129	226	1.23E-09	4.12E-09
1226	Age-gain	MSigDB Predicted Promoter Motifs	V$IRF1_01	Motif SAAAAGYGAAACC matches IRF1: interferon regulatory factor 1	2419	435.0844	546	1.254929	0.1085487	0.2257131	68	139	223	1.29E-09	4.27E-09
1227	Age-gain	MSigDB Predicted Promoter Motifs	CCTNTMAGA_UNKNOWN	Motif CCTNTMAGA (no known TF)	1093	196.5884	274	1.393775	0.05447316	0.2506862	40	72	114	1.51E-09	5.00E-09
1228	Age-gain	MSigDB Predicted Promoter Motifs	V$RP58_01	Motif NNAACATCTGGA matches ZNF238: zinc finger protein 238	1554	279.5044	370	1.323772	0.07355865	0.2380952	61	134	193	1.69E-09	5.54E-09
1229	Age-gain	MSigDB Predicted Promoter Motifs	TGACCTY_V$ERR1_Q2	Motif TGACCTY matches ESRRA: estrogen-related receptor alpha	4718	848.5854	993	1.170183	0.1974155	0.2104705	220	531	948	1.94E-09	6.35E-09
1230	Age-gain	MSigDB Predicted Promoter Motifs	YCATTAA_UNKNOWN	Motif YCATTAA (no known TF)	4278	769.4465	908	1.180069	0.1805169	0.2122487	176	346	516	2.19E-09	7.12E-09
1231	Age-gain	MSigDB Predicted Promoter Motifs	AGCYRWTTC_UNKNOWN	Motif AGCYRWTTC (no known TF)	740	133.0973	197	1.48012	0.03916501	0.2662162	33	75	114	2.39E-09	7.75E-09
1232	Age-gain	MSigDB Predicted Promoter Motifs	GATTGGY_V$NFY_Q6_01	Motif GATTGGY (no known TF)	5021	903.0834	1050	1.162683	0.2087475	0.2091217	229	582	1050	2.43E-09	7.83E-09
1233	Age-gain	MSigDB Predicted Promoter Motifs	V$HLF_01	Motif GTTACRYAAT matches HLF: hepatic leukemia factor	1715	308.4621	402	1.30324	0.07992048	0.2344023	67	156	238	2.48E-09	7.93E-09
1234	Age-gain	MSigDB Predicted Promoter Motifs	V$GATA1_04	Motif NNCWGATARNNNN matches GATA1: GATA binding protein 1 (globin transcription factor 1)	1642	295.3322	387	1.310389	0.07693837	0.2356882	83	143	230	2.54E-09	8.09E-09
1235	Age-gain	MSigDB Predicted Promoter Motifs	V$LHX3_01	Motif AATTAATTAA matches LHX3: LIM homeobox 3	2522	453.6101	564	1.243359	0.1121272	0.223632	79	150	207	2.85E-09	9.04E-09
1236	Age-gain	MSigDB Predicted Promoter Motifs	GCTNWTTGK_UNKNOWN	Motif GCTNWTTGK (no known TF)	1600	287.778	378	1.313512	0.07514911	0.23625	74	177	269	2.94E-09	9.23E-09
1237	Age-gain	MSigDB Predicted Promoter Motifs	V$HSF_Q6	Motif TTCCMGARGYTTC (no known TF)	719	129.3202	192	1.484686	0.03817097	0.2670376	40	110	178	2.94E-09	9.23E-09
1238	Age-gain	MSigDB Predicted Promoter Motifs	WCAANNNYCAG_UNKNOWN	Motif WCAANNNYCAG (no known TF)	1533	275.7273	364	1.320145	0.07236581	0.2374429	59	133	224	3.21E-09	1.00E-08
1239	Age-gain	MSigDB Predicted Promoter Motifs	V$NF1_Q6	Motif NNTTGGCNNNNNNCCNNN matches NF1: neurofibromin 1 (neurofibromatosis, von Recklinghausen disease, Watson disease)	1322	237.7766	320	1.345801	0.06361829	0.2420575	61	147	236	3.69E-09	1.15E-08
1240	Age-gain	MSigDB Predicted Promoter Motifs	V$COREBINDINGFACTOR_Q6	Motif TGTGGTTW matches CBFA2T2: core-binding factor, runt domain, alpha subunit 2; translocated to, 2&lt;br&gt; CBFA2T3: core-binding factor, runt domain, alpha subunit 2; translocated to, 3	1606	288.8572	378	1.308605	0.07514911	0.2353674	52	134	248	4.65E-09	1.44E-08
1241	Age-gain	MSigDB Predicted Promoter Motifs	V$MYOGNF1_01	Motif CRSCTGTBBNNTTTGGCACBSNGCCARCH matches NF1: neurofibromin 1 (neurofibromatosis, von Recklinghausen disease, Watson disease)	531	95.50633	149	1.560106	0.02962227	0.2806026	18	33	44	5.53E-09	1.70E-08
1242	Age-gain	MSigDB Predicted Promoter Motifs	V$PPARA_02	Motif NNRGGTCATWGGGGTSANG matches PPARA: peroxisome proliferative activated receptor, alpha	785	141.1911	205	1.451933	0.04075547	0.2611465	36	73	119	6.15E-09	1.88E-08
1243	Age-gain	MSigDB Predicted Promoter Motifs	V$DR1_Q3	Motif RGGNCAAAGGTCA matches NR2F2: nuclear receptor subfamily 2, group F, member 2	1147	206.3009	282	1.366936	0.05606362	0.2458588	54	141	234	6.70E-09	2.04E-08
1244	Age-gain	MSigDB Predicted Promoter Motifs	GCANCTGNY_V$MYOD_Q6	Motif GCANCTGNY matches MYOD1: myogenic differentiation 1	4484	806.4979	943	1.169253	0.1874751	0.2103033	201	505	848	6.76E-09	2.05E-08
1245	Age-gain	MSigDB Predicted Promoter Motifs	V$HFH8_01	Motif NNNTGTTTATNTR matches FOXJ1: forkhead box J1	1991	358.1038	455	1.270581	0.09045726	0.2285284	73	136	183	6.98E-09	2.10E-08
1246	Age-gain	MSigDB Predicted Promoter Motifs	V$NFY_C	Motif NCTGATTGGYTASY (no known TF)	1495	268.8926	354	1.316511	0.07037773	0.2367893	54	132	220	7.37E-09	2.21E-08
1247	Age-gain	MSigDB Predicted Promoter Motifs	V$CEBP_Q2_01	Motif NTTRCNNAANNN matches CEBPA: CCAAT/enhancer binding protein (C/EBP), alpha	2162	388.86	488	1.25495	0.09701789	0.2257169	80	165	259	1.07E-08	3.21E-08
1248	Age-gain	MSigDB Predicted Promoter Motifs	V$CEBPB_01	Motif RNRTKDNGMAAKNN matches CEBPB: CCAAT/enhancer binding protein (C/EBP), beta	1486	267.2738	351	1.31326	0.06978131	0.2362046	65	157	246	1.14E-08	3.38E-08
1249	Age-gain	MSigDB Predicted Promoter Motifs	GATAAGR_V$GATA_C	Motif GATAAGR (no known TF)	2111	379.6871	477	1.256298	0.09483101	0.2259593	72	155	276	1.38E-08	4.09E-08
1250	Age-gain	MSigDB Predicted Promoter Motifs	V$PAX8_B	Motif NCNNTNNTGCRTGANNNN matches PAX8: paired box gene 8	1132	203.6029	277	1.360491	0.05506958	0.2446996	38	72	93	1.47E-08	4.32E-08
1251	Age-gain	MSigDB Predicted Promoter Motifs	V$FOXM1_01	Motif ARATKGAST matches FOXM1: forkhead box M1	2470	444.2573	548	1.233519	0.1089463	0.2218623	81	164	233	1.60E-08	4.69E-08
1252	Age-gain	MSigDB Predicted Promoter Motifs	V$CREB_Q3	Motif CGTCAN matches CREB1: cAMP responsive element binding protein 1	1550	278.785	363	1.302079	0.072167	0.2341935	63	149	224	1.71E-08	4.98E-08
1253	Age-gain	MSigDB Predicted Promoter Motifs	CGGAARNGGCNG_UNKNOWN	Motif CGGAARNGGCNG (no known TF)	426	76.6209	123	1.605306	0.02445328	0.2887324	13	26	48	1.99E-08	5.78E-08
1254	Age-gain	MSigDB Predicted Promoter Motifs	V$AML1_01	Motif TGTGGT matches RUNX1: runt-related transcription factor 1 (acute myeloid leukemia 1; aml1 oncogene)	1363	245.1509	324	1.321635	0.06441352	0.2377109	47	129	248	2.16E-08	6.22E-08
1255	Age-gain	MSigDB Predicted Promoter Motifs	V$AML1_Q6	Motif TGTGGT matches RUNX1: runt-related transcription factor 1 (acute myeloid leukemia 1; aml1 oncogene)	1363	245.1509	324	1.321635	0.06441352	0.2377109	47	129	248	2.16E-08	6.22E-08
1256	Age-gain	MSigDB Predicted Promoter Motifs	V$CDPCR3HD_01	Motif NATYGATSSS matches CUTL1: cut-like 1, CCAAT displacement protein (Drosophila)	1994	358.6434	452	1.260305	0.08986083	0.22668	77	167	213	2.28E-08	6.53E-08
1257	Age-gain	MSigDB Predicted Promoter Motifs	V$OCT1_02	Motif NNGAATATKCANNNN matches POU2F1: POU domain, class 2, transcription factor 1	2215	398.3927	496	1.245003	0.09860835	0.2239278	68	142	198	2.41E-08	6.87E-08
1258	Age-gain	MSigDB Predicted Promoter Motifs	V$AP2_Q3	Motif GSCCSCRGGCNRNRNN matches GTF3A: general transcription factor IIIA	1640	294.9725	379	1.284866	0.07534791	0.2310976	73	162	236	3.90E-08	1.10E-07
1259	Age-gain	MSigDB Predicted Promoter Motifs	V$HFH1_01	Motif NATTGTTTATWT matches FOXQ1: forkhead box Q1	2228	400.7309	497	1.240234	0.09880716	0.22307	78	156	226	3.92E-08	1.11E-07
1260	Age-gain	MSigDB Predicted Promoter Motifs	V$GATA1_01	Motif SNNGATNNNN matches GATA1: GATA binding protein 1 (globin transcription factor 1)	1647	296.2315	380	1.282781	0.07554672	0.2307225	77	163	222	4.51E-08	1.27E-07
1261	Age-gain	MSigDB Predicted Promoter Motifs	V$GATA_Q6	Motif WGATARN matches GATA1: GATA binding protein 1 (globin transcription factor 1)	1104	198.5668	268	1.349672	0.05328032	0.2427536	54	109	185	5.39E-08	1.51E-07
1262	Age-gain	MSigDB Predicted Promoter Motifs	GCCNNNWTAAR_UNKNOWN	Motif GCCNNNWTAAR (no known TF)	1198	215.4738	287	1.331949	0.05705765	0.2395659	61	97	133	6.68E-08	1.86E-07
1263	Age-gain	MSigDB Predicted Promoter Motifs	TTGCWCAAY_V$CEBPB_02	Motif TTGCWCAAY matches CEBPB: CCAAT/enhancer binding protein (C/EBP), beta	370	66.54867	108	1.622872	0.02147117	0.2918919	16	40	59	7.71E-08	2.14E-07
1264	Age-gain	MSigDB Predicted Promoter Motifs	V$EVI1_02	Motif AGAYAAGATAA matches EVI1: ecotropic viral integration site 1	1088	195.6891	263	1.343969	0.05228628	0.2417279	36	81	120	1.06E-07	2.92E-07
1265	Age-gain	MSigDB Predicted Promoter Motifs	V$USF_Q6	Motif GYCACGTGNC (no known TF)	804	144.6085	203	1.403791	0.04035785	0.2524876	47	134	241	1.16E-07	3.18E-07
1266	Age-gain	MSigDB Predicted Promoter Motifs	TGTTTGY_V$HNF3_Q6	Motif TGTTTGY matches FOXA1: forkhead box A1	5048	907.9396	1037	1.142146	0.206163	0.2054279	185	415	669	1.39E-07	3.81E-07
1267	Age-gain	MSigDB Predicted Promoter Motifs	V$PPARA_01	Motif CARAACTAGGNCAAAGGTCA matches PPARA: peroxisome proliferative activated receptor, alpha	198	35.61253	66	1.85328	0.01312127	0.3333333	8	22	34	1.46E-07	3.96E-07
1268	Age-gain	MSigDB Predicted Promoter Motifs	RNGTGGGC_UNKNOWN	Motif RNGTGGGC (no known TF)	3921	705.236	821	1.164149	0.1632207	0.2093854	183	450	709	1.82E-07	4.93E-07
1269	Age-gain	MSigDB Predicted Promoter Motifs	GTGGGTGK_UNKNOWN	Motif GTGGGTGK (no known TF)	1713	308.1023	389	1.262568	0.07733598	0.227087	70	181	271	1.91E-07	5.14E-07
1270	Age-gain	MSigDB Predicted Promoter Motifs	V$GATA1_05	Motif NCWGATAACA matches GATA1: GATA binding protein 1 (globin transcription factor 1)	2219	399.1121	489	1.22522	0.0972167	0.2203695	92	175	265	2.45E-07	6.59E-07
1271	Age-gain	MSigDB Predicted Promoter Motifs	V$E4BP4_01	Motif NRTTAYGTAAYN matches NFIL3: nuclear factor, interleukin 3 regulated	1031	185.437	249	1.342774	0.04950298	0.2415131	48	143	206	2.50E-07	6.68E-07
1272	Age-gain	MSigDB Predicted Promoter Motifs	V$E2A_Q2	Motif NCACCTGYYNCNKN matches TCF3: transcription factor 3 (E2A immunoglobulin enhancer binding factors E12/E47)	1386	249.2877	322	1.29168	0.0640159	0.2323232	51	122	214	2.54E-07	6.76E-07
1273	Age-gain	MSigDB Predicted Promoter Motifs	V$TGIF_01	Motif AGCTGTCANNA matches TGIF: TGFB-induced factor (TALE family homeobox)	1683	302.7065	382	1.261948	0.07594433	0.2269756	56	147	224	2.61E-07	6.91E-07
1274	Age-gain	MSigDB Predicted Promoter Motifs	YTAAYNGCT_UNKNOWN	Motif YTAAYNGCT (no known TF)	1783	320.6926	402	1.253537	0.07992048	0.2254627	46	109	142	2.66E-07	7.03E-07
1275	Age-gain	MSigDB Predicted Promoter Motifs	RYTGCNWTGGNR_UNKNOWN	Motif RYTGCNWTGGNR (no known TF)	645	116.0105	167	1.439525	0.0332008	0.2589147	31	66	105	2.80E-07	7.35E-07
1276	Age-gain	MSigDB Predicted Promoter Motifs	V$STAT5A_03	Motif NAWTTCYN matches STAT5A: signal transducer and activator of transcription 5A	2207	396.9538	486	1.224324	0.09662028	0.2202084	75	161	237	2.94E-07	7.68E-07
1277	Age-gain	MSigDB Predicted Promoter Motifs	V$OCT1_07	Motif TNTATGBTAATT matches POU2F1: POU domain, class 2, transcription factor 1	1614	290.2961	367	1.264227	0.07296223	0.2273854	54	107	143	3.75E-07	9.76E-07
1278	Age-gain	MSigDB Predicted Promoter Motifs	V$ZF5_B	Motif NRNGNGCGCGCWN matches ZFP161: zinc finger protein 161 homolog (mouse)	1413	254.144	326	1.282738	0.06481113	0.2307148	70	154	215	4.25E-07	1.10E-06
1279	Age-gain	MSigDB Predicted Promoter Motifs	V$FXR_IR1_Q6	Motif GGGTBAATRACCY matches RXRA: retinoid X receptor, alpha	608	109.3556	158	1.444827	0.03141153	0.2598684	30	63	99	4.56E-07	1.18E-06
1280	Age-gain	MSigDB Predicted Promoter Motifs	V$NFY_01	Motif NNNRRCCAATSRGNNN (no known TF)	1299	233.6398	302	1.292588	0.06003976	0.2324865	55	138	233	5.64E-07	1.45E-06
1281	Age-gain	MSigDB Predicted Promoter Motifs	V$CMYB_01	Motif NCNRNNGRCNGTTGGKGG matches MYB: v-myb myeloblastosis viral oncogene homolog (avian)	1314	236.3377	305	1.290526	0.06063618	0.2321157	60	144	226	5.76E-07	1.47E-06
1282	Age-gain	MSigDB Predicted Promoter Motifs	TCANNTGAY_V$SREBP1_01	Motif TCANNTGAY matches SREBF1: sterol regulatory element binding transcription factor 1	2104	378.4281	463	1.223482	0.09204771	0.220057	78	222	433	6.23E-07	1.59E-06
1283	Age-gain	MSigDB Predicted Promoter Motifs	V$HEB_Q6	Motif RCCWGCTG matches TCF12: transcription factor 12 (HTF4, helix-loop-helix transcription factors 4)	1162	208.9988	273	1.306228	0.05427435	0.2349398	63	133	236	8.05E-07	2.05E-06
1284	Age-gain	MSigDB Predicted Promoter Motifs	V$NFKB_Q6_01	Motif NNNNKGGRAANTCCCN (no known TF)	1202	216.1932	281	1.299763	0.05586481	0.233777	54	120	219	8.63E-07	2.18E-06
1285	Age-gain	MSigDB Predicted Promoter Motifs	V$ARNT_01	Motif NDDNNCACGTGNNNNN matches ARNT: aryl hydrocarbon receptor nuclear translocator	1278	229.8627	296	1.287725	0.05884692	0.2316119	66	137	234	1.03E-06	2.60E-06
1286	Age-gain	MSigDB Predicted Promoter Motifs	V$FREAC7_01	Motif WNNANATAAAYANNNN matches FOXL1: forkhead box L1	1816	326.628	404	1.236881	0.08031809	0.222467	72	123	173	1.08E-06	2.71E-06
1287	Age-gain	MSigDB Predicted Promoter Motifs	V$MYB_Q6	Motif NNNAACTGNC matches MYB: v-myb myeloblastosis viral oncogene homolog (avian)	1256	225.9057	291	1.288148	0.05785288	0.2316879	60	139	225	1.24E-06	3.09E-06
1288	Age-gain	MSigDB Predicted Promoter Motifs	V$SPZ1_01	Motif DNNGGRGGGWWNNNN matches SPZ1: spermatogenic leucine zipper 1	1945	349.8302	429	1.226309	0.08528827	0.2205656	82	160	217	1.29E-06	3.20E-06
1289	Age-gain	MSigDB Predicted Promoter Motifs	YRCCAKNNGNCGC_UNKNOWN	Motif YRCCAKNNGNCGC (no known TF)	312	56.11671	90	1.6038	0.01789264	0.2884615	22	43	62	1.55E-06	3.86E-06
1290	Age-gain	MSigDB Predicted Promoter Motifs	CGTSACG_V$PAX3_B	Motif CGTSACG matches PAX3: paired box gene 3 (Waardenburg syndrome 1)	910	163.6737	219	1.338028	0.04353877	0.2406593	29	76	132	1.71E-06	4.23E-06
1291	Age-gain	MSigDB Predicted Promoter Motifs	V$PAX3_01	Motif TCGTCACRCTTHM matches PAX3: paired box gene 3 (Waardenburg syndrome 1)	65	11.69098	28	2.395008	0.0055666	0.4307692	3	8	20	2.35E-06	5.78E-06
1292	Age-gain	MSigDB Predicted Promoter Motifs	V$FOXJ2_01	Motif NNNWAAAYAAAYANNNNN matches FOXJ2: forkhead box J2	1734	311.8794	385	1.234451	0.07654076	0.22203	74	128	168	2.39E-06	5.85E-06
1293	Age-gain	MSigDB Predicted Promoter Motifs	CACGTG_V$MYC_Q2	Motif CACGTG matches MYC: v-myc myelocytomatosis viral oncogene homolog (avian)	3883	698.4013	801	1.146905	0.1592445	0.2062838	201	501	941	2.92E-06	7.13E-06
1294	Age-gain	MSigDB Predicted Promoter Motifs	ATCMNTCCGY_UNKNOWN	Motif ATCMNTCCGY (no known TF)	299	53.77852	86	1.599152	0.01709742	0.2876254	15	33	50	2.98E-06	7.23E-06
1295	Age-gain	MSigDB Predicted Promoter Motifs	V$MEIS1AHOXA9_01	Motif TGACAGKTTTAYGA matches MEIS1: Meis1, myeloid ecotropic viral integration site 1 homolog (mouse)&lt;br&gt; HOXA9: homeobox A9	1210	217.6321	279	1.28198	0.0554672	0.2305785	36	82	106	3.07E-06	7.43E-06
1296	Age-gain	MSigDB Predicted Promoter Motifs	GGCKCATGS_UNKNOWN	Motif GGCKCATGS (no known TF)	585	105.2188	149	1.416096	0.02962227	0.2547009	15	38	61	3.23E-06	7.78E-06
1297	Age-gain	MSigDB Predicted Promoter Motifs	V$ETS1_B	Motif RCAGGAAGTGNNTNS matches ETS1: v-ets erythroblastosis virus E26 oncogene homolog 1 (avian)	1056	189.9335	247	1.300455	0.04910537	0.2339015	50	129	231	3.79E-06	9.11E-06
1298	Age-gain	MSigDB Predicted Promoter Motifs	V$STAT4_01	Motif SNWTTCNN matches STAT4: signal transducer and activator of transcription 4	1808	325.1892	398	1.223903	0.07912525	0.2201327	70	154	244	3.87E-06	9.27E-06
1299	Age-gain	MSigDB Predicted Promoter Motifs	V$CEBPDELTA_Q6	Motif MATTKCNTMAYY matches CEBPD: CCAAT/enhancer binding protein (C/EBP), delta	2074	373.0323	450	1.20633	0.08946322	0.216972	80	150	224	4.36E-06	1.04E-05
1300	Age-gain	MSigDB Predicted Promoter Motifs	MYAATNNNNNNNGGC_UNKNOWN	Motif MYAATNNNNNNNGGC (no known TF)	904	162.5946	215	1.322307	0.04274354	0.2378319	30	66	101	4.99E-06	1.19E-05
1301	Age-gain	MSigDB Predicted Promoter Motifs	V$FXR_Q3	Motif CARGKTSAWTRACC matches NR1H4: nuclear receptor subfamily 1, group H, member 4	909	163.4939	216	1.32115	0.04294235	0.2376238	31	62	102	5.06E-06	1.20E-05
1302	Age-gain	MSigDB Predicted Promoter Motifs	V$OCT1_03	Motif NNNRTAATNANNN matches POU2F1: POU domain, class 2, transcription factor 1	2562	460.8045	543	1.178374	0.1079523	0.2119438	85	154	208	7.48E-06	1.76E-05
1303	Age-gain	MSigDB Predicted Promoter Motifs	V$AP1_Q4	Motif RGTGACTMANN matches JUN: jun oncogene	800	143.889	192	1.334362	0.03817097	0.24	44	122	242	8.77E-06	2.06E-05
1304	Age-gain	MSigDB Predicted Promoter Motifs	V$AP2GAMMA_01	Motif GCCYNNGGS matches TFAP2C: transcription factor AP-2 gamma (activating enhancer binding protein 2 gamma)	1631	293.3537	360	1.227187	0.07157058	0.2207235	77	152	231	8.89E-06	2.08E-05
1305	Age-gain	MSigDB Predicted Promoter Motifs	V$AR_Q6	Motif WGAGCANRN matches AR: androgen receptor (dihydrotestosterone receptor; testicular feminization; spinal and bulbar muscular atrophy; Kennedy disease)	1568	282.0225	347	1.230398	0.06898608	0.221301	61	144	224	1.03E-05	2.39E-05
1306	Age-gain	MSigDB Predicted Promoter Motifs	RGAANNTTC_V$HSF1_01	Motif RGAANNTTC matches HSF1: heat shock transcription factor 1	2168	389.9392	465	1.192494	0.09244533	0.2144834	102	240	410	1.04E-05	2.42E-05
1307	Age-gain	MSigDB Predicted Promoter Motifs	YWATTWNNRGCT_UNKNOWN	Motif YWATTWNNRGCT (no known TF)	774	139.2126	186	1.336086	0.03697813	0.2403101	28	52	64	1.11E-05	2.56E-05
1308	Age-gain	MSigDB Predicted Promoter Motifs	V$MMEF2_Q6	Motif CKSNYTAAAAAWRMCY (no known TF)	2064	371.2336	444	1.196012	0.08827038	0.2151163	96	187	252	1.24E-05	2.86E-05
1309	Age-gain	MSigDB Predicted Promoter Motifs	CCCNNNNNNAAGWT_UNKNOWN	Motif CCCNNNNNNAAGWT (no known TF)	829	149.105	197	1.321217	0.03916501	0.2376357	30	66	92	1.29E-05	2.97E-05
1310	Age-gain	MSigDB Predicted Promoter Motifs	V$LFA1_Q6	Motif GGGSTCWR matches ITGAL: integrin, alpha L (antigen CD11A (p180), lymphocyte function-associated antigen 1; alpha polypeptide)	1378	247.8488	308	1.242693	0.0612326	0.2235123	71	143	226	1.44E-05	3.29E-05
1311	Age-gain	MSigDB Predicted Promoter Motifs	CAGNYGKNAAA_UNKNOWN	Motif CAGNYGKNAAA (no known TF)	507	91.18966	129	1.414634	0.02564612	0.2544379	21	54	70	1.50E-05	3.42E-05
1312	Age-gain	MSigDB Predicted Promoter Motifs	V$COUP_01	Motif TGAMCTTTGMMCYT matches HNF4A: hepatocyte nuclear factor 4, alpha	1411	253.7842	314	1.237271	0.06242545	0.2225372	59	135	239	1.71E-05	3.89E-05
1313	Age-gain	MSigDB Predicted Promoter Motifs	V$AP2_Q6	Motif MKCCCSCNGGCG matches GTF3A: general transcription factor IIIA	1721	309.5412	375	1.21147	0.07455268	0.2178966	72	158	242	1.92E-05	4.35E-05
1314	Age-gain	MSigDB Predicted Promoter Motifs	V$ETS2_B	Motif KRCAGGAARTRNKT matches ETS2: v-ets erythroblastosis virus E26 oncogene homolog 2 (avian)	1251	225.0064	281	1.248853	0.05586481	0.2246203	47	136	248	2.33E-05	5.26E-05
1315	Age-gain	MSigDB Predicted Promoter Motifs	V$MYOD_Q6	Motif NNCACCTGNY matches MYOD1: myogenic differentiation 1	1467	263.8565	324	1.22794	0.06441352	0.2208589	60	122	229	2.38E-05	5.35E-05
1316	Age-gain	MSigDB Predicted Promoter Motifs	V$PPARG_01	Motif NNWGRGGTCAAAGGTCANNNN matches PPARG: peroxisome proliferative activated receptor, gamma	194	34.89308	58	1.66222	0.01153082	0.2989691	12	20	42	3.40E-05	7.61E-05
1317	Age-gain	MSigDB Predicted Promoter Motifs	V$OCT1_B	Motif TATGCAAATN matches POU2F1: POU domain, class 2, transcription factor 1	1641	295.1523	357	1.209545	0.07097416	0.2175503	65	150	242	3.50E-05	7.81E-05
1318	Age-gain	MSigDB Predicted Promoter Motifs	CTAWWWATA_V$RSRFC4_Q2	Motif CTAWWWATA matches MEF2A: MADS box transcription enhancer factor 2, polypeptide A (myocyte enhancer factor 2A)	1877	337.5996	403	1.193722	0.08011928	0.2147043	74	193	338	3.78E-05	8.40E-05
1319	Age-gain	MSigDB Predicted Promoter Motifs	GGAANCGGAANY_UNKNOWN	Motif GGAANCGGAANY (no known TF)	238	42.80698	68	1.588526	0.01351889	0.2857143	14	35	94	3.85E-05	8.49E-05
1320	Age-gain	MSigDB Predicted Promoter Motifs	V$FOXO4_01	Motif RWAAACAANNN matches MLLT7: myeloid/lymphoid or mixed-lineage leukemia (trithorax homolog, Drosophila); translocated to, 7	2026	364.3989	432	1.185514	0.08588469	0.213228	79	167	220	3.85E-05	8.49E-05
1321	Age-gain	MSigDB Predicted Promoter Motifs	V$FOXO4_02	Motif NNGTTGTTTACNTN matches MLLT7: myeloid/lymphoid or mixed-lineage leukemia (trithorax homolog, Drosophila); translocated to, 7	1954	351.4489	416	1.183671	0.08270378	0.2128966	84	173	240	6.20E-05	0.000136161
1322	Age-gain	MSigDB Predicted Promoter Motifs	TGACATY_UNKNOWN	Motif TGACATY (no known TF)	3608	648.9394	733	1.129535	0.1457256	0.2031596	150	362	604	6.34E-05	0.000138834
1323	Age-gain	MSigDB Predicted Promoter Motifs	V$LMO2COM_01	Motif CNNCAGGTGBNN matches LMO2: LIM domain only 2 (rhombotin-like 1)	1273	228.9634	282	1.231638	0.05606362	0.221524	58	153	241	6.40E-05	0.000139636
1324	Age-gain	MSigDB Predicted Promoter Motifs	V$TEL2_Q6	Motif YTACTTCCTG matches ETV7: ets variant gene 7 (TEL2 oncogene)	831	149.4647	193	1.291275	0.03836978	0.2322503	27	94	212	6.46E-05	0.000140356
1325	Age-gain	MSigDB Predicted Promoter Motifs	GCGNNANTTCC_UNKNOWN	Motif GCGNNANTTCC (no known TF)	565	101.6216	138	1.357979	0.02743539	0.2442478	23	53	109	6.49E-05	0.000140501
1326	Age-gain	MSigDB Predicted Promoter Motifs	TTCYRGAA_UNKNOWN	Motif TTCYRGAA (no known TF)	1129	203.0634	253	1.245917	0.05029821	0.2240921	67	164	299	6.92E-05	0.000149237
1327	Age-gain	MSigDB Predicted Promoter Motifs	GGAMTNNNNNTCCY_UNKNOWN	Motif GGAMTNNNNNTCCY (no known TF)	749	134.7161	176	1.306451	0.03499006	0.23498	24	58	104	6.95E-05	0.000149542
1328	Age-gain	MSigDB Predicted Promoter Motifs	V$POU3F2_01	Motif ATGMATWWATTCAT matches POU3F2: POU domain, class 3, transcription factor 2	962	173.0265	219	1.265702	0.04353877	0.2276507	36	65	94	7.89E-05	0.000169133
1329	Age-gain	MSigDB Predicted Promoter Motifs	V$IK3_01	Motif TNYTGGGAATACC (no known TF)	1263	227.1648	279	1.228183	0.0554672	0.2209026	62	127	205	8.56E-05	0.000182767
1330	Age-gain	MSigDB Predicted Promoter Motifs	V$T3R_Q6	Motif MNTGWCCTN (no known TF)	1532	275.5475	332	1.204874	0.06600398	0.2167102	60	149	230	8.93E-05	0.000190085
1331	Age-gain	MSigDB Predicted Promoter Motifs	V$NFAT_Q4_01	Motif NWGGAAANWN matches NFAT&lt;br&gt; NFATC	1948	350.3697	413	1.178755	0.08210736	0.2120123	68	152	247	9.56E-05	0.000202732
1332	Age-gain	MSigDB Predicted Promoter Motifs	V$SP3_Q3	Motif ASMCTTGGGSRGGG matches SP3: Sp3 transcription factor	1196	215.1141	265	1.231905	0.0526839	0.2215719	63	153	227	0.000103911	0.000219606
1333	Age-gain	MSigDB Predicted Promoter Motifs	V$HSF1_01	Motif AGAANRTTCN matches HSF1: heat shock transcription factor 1	1623	291.9148	349	1.195554	0.0693837	0.2150339	73	153	247	0.000111168	0.000234137
1334	Age-gain	MSigDB Predicted Promoter Motifs	V$SRF_01	Motif ATGCCCATATATGGWNNT matches SRF: serum response factor (c-fos serum response element-binding transcription factor)	207	37.23128	59	1.584689	0.01172962	0.2850242	10	25	47	0.00012938	0.000271565
1335	Age-gain	MSigDB Predicted Promoter Motifs	CATTGTYY_V$SOX9_B1	Motif CATTGTYY matches SOX9: SRY (sex determining region Y)-box 9 (campomelic dysplasia, autosomal sex-reversal)	2157	387.9607	452	1.165066	0.08986083	0.2095503	88	220	332	0.000133308	0.000278859
1336	Age-gain	MSigDB Predicted Promoter Motifs	V$FOXO1_01	Motif NRWAAACAAN matches FOXO1A: forkhead box O1A (rhabdomyosarcoma)	2251	404.8677	470	1.160873	0.09343936	0.2087961	83	167	222	0.000137071	0.000285758
1337	Age-gain	MSigDB Predicted Promoter Motifs	V$XBP1_01	Motif NNGNTGACGTGKNNNWT matches XBP1: X-box binding protein 1	765	137.5939	177	1.286395	0.03518887	0.2313725	34	78	124	0.000156043	0.000324212
1338	Age-gain	MSigDB Predicted Promoter Motifs	V$NFKAPPAB65_01	Motif GGGRATTTCC matches RELA: v-rel reticuloendotheliosis viral oncogene homolog A, nuclear factor of kappa light polypeptide gene enhancer in B-cells 3, p65 (avian)	954	171.5876	215	1.253004	0.04274354	0.2253669	49	124	225	0.000168469	0.000348849
1339	Age-gain	MSigDB Predicted Promoter Motifs	CAGNWMCNNNGAC_UNKNOWN	Motif CAGNWMCNNNGAC (no known TF)	240	43.1667	66	1.528956	0.01312127	0.275	20	44	77	0.000170802	0.000352495
1340	Age-gain	MSigDB Predicted Promoter Motifs	V$NFKAPPAB_01	Motif GGGAMTTYCC matches NFKB&lt;br&gt; RELA: v-rel reticuloendotheliosis viral oncogene homolog A, nuclear factor of kappa light polypeptide gene enhancer in B-cells 3, p65 (avian)	1165	209.5384	257	1.226506	0.05109344	0.2206009	62	131	234	0.000175733	0.000361456
1341	Age-gain	MSigDB Predicted Promoter Motifs	V$LMO2COM_02	Motif NMGATANSG matches LMO2: LIM domain only 2 (rhombotin-like 1)	1471	264.5759	317	1.198144	0.06302187	0.2154997	62	144	226	0.000194281	0.000398276
1342	Age-gain	MSigDB Predicted Promoter Motifs	V$NFY_Q6	Motif TRRCCAATSRN (no known TF)	1487	267.4537	320	1.196469	0.06361829	0.2151984	63	146	229	0.000201112	0.000410909
1343	Age-gain	MSigDB Predicted Promoter Motifs	V$HSF2_01	Motif NGAANNWTCK matches HSF2: heat shock transcription factor 2	1411	253.7842	305	1.201808	0.06063618	0.2161588	69	140	233	0.000205658	0.00041843
1344	Age-gain	MSigDB Predicted Promoter Motifs	WTGAAAT_UNKNOWN	Motif WTGAAAT (no known TF)	4068	731.6756	813	1.111148	0.1616302	0.1998525	151	353	551	0.000206153	0.00041843
1345	Age-gain	MSigDB Predicted Promoter Motifs	V$CETS1P54_01	Motif NCMGGAWGYN matches ETS1: v-ets erythroblastosis virus E26 oncogene homolog 1 (avian)	779	140.1119	179	1.27755	0.03558648	0.2297818	36	110	227	0.000208396	0.000421591
1346	Age-gain	MSigDB Predicted Promoter Motifs	V$OLF1_01	Motif NNCDABTCCCYAGRGARBNKGN matches OLF1&lt;br&gt; OR5I1: olfactory receptor, family 5, subfamily I, member 1	1581	284.3607	338	1.188631	0.06719682	0.2137887	61	163	251	0.000221425	0.000446479
1347	Age-gain	MSigDB Predicted Promoter Motifs	WCTCNATGGY_UNKNOWN	Motif WCTCNATGGY (no known TF)	400	71.9445	100	1.38996	0.01988072	0.25	14	34	71	0.000255899	0.000514306
1348	Age-gain	MSigDB Predicted Promoter Motifs	V$ZIC1_01	Motif KGGGTGGTC matches ZIC1: Zic family member 1 (odd-paired homolog, Drosophila)	1332	239.5752	288	1.202128	0.05725646	0.2162162	70	158	234	0.000300854	0.000602687
1349	Age-gain	MSigDB Predicted Promoter Motifs	V$E2F_01	Motif TWSGCGCGAAAAYKR (no known TF)	502	90.29035	121	1.340121	0.02405567	0.2410359	15	38	62	0.000310449	0.00061989
1350	Age-gain	MSigDB Predicted Promoter Motifs	ACAWYAAAG_UNKNOWN	Motif ACAWYAAAG (no known TF)	594	106.8376	140	1.3104	0.027833	0.2356902	30	62	91	0.000316794	0.000630513
1351	Age-gain	MSigDB Predicted Promoter Motifs	YTTCCNNNGGAMR_UNKNOWN	Motif YTTCCNNNGGAMR (no known TF)	352	63.31116	89	1.405755	0.01769384	0.2528409	14	33	46	0.000364024	0.000722176
1352	Age-gain	MSigDB Predicted Promoter Motifs	V$USF_02	Motif NNRNCACGTGNYNN (no known TF)	979	176.0842	217	1.232365	0.04314115	0.2216547	47	140	250	0.000415228	0.000821111
1353	Age-gain	MSigDB Predicted Promoter Motifs	V$ALPHACP1_01	Motif CAGCCAATGAG matches PCBP1: poly(rC) binding protein 1	1626	292.4544	344	1.176252	0.06838966	0.2115621	54	141	237	0.000426103	0.000839915
1354	Age-gain	MSigDB Predicted Promoter Motifs	V$HMEF2_Q6	Motif SKYTAAAAATAACYCH (no known TF)	790	142.0904	179	1.259761	0.03558648	0.2265823	29	75	123	0.000432292	0.000849392
1355	Age-gain	MSigDB Predicted Promoter Motifs	GTGACGY_V$E4F1_Q6	Motif GTGACGY matches E4F1: E4F transcription factor 1	2293	412.4219	472	1.144459	0.09383698	0.2058439	104	312	592	0.00047622	0.000932724
1356	Age-gain	MSigDB Predicted Promoter Motifs	V$HEN1_01	Motif NNNGGNCNCAGCTGCGNCCCNN matches NHLH1: nescient helix loop helix 1	1650	296.7711	348	1.172621	0.06918489	0.2109091	57	117	180	0.000495207	0.000966833
1357	Age-gain	MSigDB Predicted Promoter Motifs	GTTGNYNNRGNAAC_UNKNOWN	Motif GTTGNYNNRGNAAC (no known TF)	374	67.26811	93	1.382527	0.01848907	0.2486631	17	52	100	0.000497007	0.000967275
1358	Age-gain	MSigDB Predicted Promoter Motifs	RNCTGNYNRNCTGNY_UNKNOWN	Motif RNCTGNYNRNCTGNY (no known TF)	480	86.3334	115	1.332045	0.02286282	0.2395833	22	44	71	0.000546761	0.00106075
1359	Age-gain	MSigDB Predicted Promoter Motifs	V$PAX4_01	Motif NGNVGTCANGCGTGNNSNNYN matches PAX4: paired box gene 4	1689	303.7857	355	1.168587	0.07057654	0.2101835	71	166	244	0.000561091	0.001084519
1360	Age-gain	MSigDB Predicted Promoter Motifs	V$AP1_Q6	Motif NNTGACTCANN matches JUN: jun oncogene	636	114.3918	147	1.285058	0.02922465	0.2311321	37	119	232	0.000562539	0.001084519
1361	Age-gain	MSigDB Predicted Promoter Motifs	AAGWWRNYGGC_UNKNOWN	Motif AAGWWRNYGGC (no known TF)	710	127.7015	162	1.268583	0.03220676	0.228169	28	74	107	0.000567621	0.001090897
1362	Age-gain	MSigDB Predicted Promoter Motifs	V$AML_Q6	Motif NNGKNTGTGGTTWNC matches RUNX1: runt-related transcription factor 1 (acute myeloid leukemia 1; aml1 oncogene)	1289	231.8412	277	1.194784	0.05506958	0.2148953	57	132	243	0.000576558	0.001104621
1363	Age-gain	MSigDB Predicted Promoter Motifs	V$EVI1_01	Motif WGAYAAGATAAGATAA matches EVI1: ecotropic viral integration site 1	105	18.88543	33	1.747379	0.006560636	0.3142857	5	9	14	0.000589051	0.001125051
1364	Age-gain	MSigDB Predicted Promoter Motifs	V$GATA2_01	Motif NNNGATRNNN matches GATA2: GATA binding protein 2	692	124.464	158	1.269443	0.03141153	0.2283237	45	81	102	0.000638294	0.001215328
1365	Age-gain	MSigDB Predicted Promoter Motifs	V$CEBP_01	Motif NNTKTGGWNANNN matches CEBPA: CCAAT/enhancer binding protein (C/EBP), alpha	2312	415.8392	474	1.139864	0.09423459	0.2050173	78	176	248	0.000653206	0.001239883
1366	Age-gain	MSigDB Predicted Promoter Motifs	V$HOX13_01	Motif TGCNHNCWYCCYCATTAKTNNDCNMNHYCN matches HOXA5: homeobox A5	497	89.39105	118	1.320043	0.02345924	0.2374245	17	32	41	0.000669913	0.001266552
1367	Age-gain	MSigDB Predicted Promoter Motifs	V$E12_Q6	Motif RRCAGGTGNCV matches TCF3: transcription factor 3 (E2A immunoglobulin enhancer binding factors E12/E47)	1119	201.2648	243	1.207365	0.04831014	0.2171582	53	133	249	0.000671376	0.001266552
1368	Age-gain	MSigDB Predicted Promoter Motifs	V$CDP_02	Motif NWNATCGATTANYNN matches CUTL1: cut-like 1, CCAAT displacement protein (Drosophila)	1311	235.7981	280	1.187456	0.055666	0.2135774	46	83	99	0.00079495	0.001495089
1369	Age-gain	MSigDB Predicted Promoter Motifs	V$SRY_02	Motif NWWAACAAWANN matches SRY: sex determining region Y	2798	503.2518	565	1.122698	0.112326	0.2019299	90	175	230	0.000844882	0.001584154
1370	Age-gain	MSigDB Predicted Promoter Motifs	V$MYOD_Q6_01	Motif CNGNRNCAGGTGNNGNAN matches MYOD1: myogenic differentiation 1	1330	239.2155	283	1.183034	0.05626243	0.212782	69	144	233	0.000942237	0.001761324
1371	Age-gain	MSigDB Predicted Promoter Motifs	V$ER_Q6	Motif NNARGNCANNNTGACCYNN matches ESR1: estrogen receptor 1	1749	314.5773	364	1.157108	0.07236581	0.2081189	70	155	257	0.000980307	0.001826936
1372	Age-gain	MSigDB Predicted Promoter Motifs	V$MYOGENIN_Q6	Motif RGCAGSTG matches MYOG: myogenin (myogenic factor 4)	1352	243.1724	287	1.180233	0.05705765	0.2122781	61	134	234	0.001008307	0.00187344
1373	Age-gain	MSigDB Predicted Promoter Motifs	V$YY1_Q6	Motif GCCATNTTN matches YY1: YY1 transcription factor	1378	247.8488	292	1.178138	0.05805169	0.2119013	48	131	220	0.001022744	0.001894541
1374	Age-gain	MSigDB Predicted Promoter Motifs	V$RSRFC4_Q2	Motif ANKCTAWAAATAGMHNN matches MEF2A: MADS box transcription enhancer factor 2, polypeptide A (myocyte enhancer factor 2A)	1154	207.5599	248	1.194836	0.04930417	0.2149047	46	121	198	0.001088701	0.002010664
1375	Age-gain	MSigDB Predicted Promoter Motifs	V$ER_Q6_02	Motif NAGGTCANNNY matches ESR1: estrogen receptor 1	1257	226.0856	268	1.185392	0.05328032	0.213206	64	156	242	0.001129322	0.00207944
1376	Age-gain	MSigDB Predicted Promoter Motifs	V$PTF1BETA_Q6	Motif GRGAAAMBBWCAGS matches PTF1A: pancreas specific transcription factor, 1a	1438	258.6405	303	1.17151	0.06023857	0.2107093	70	155	220	0.001188372	0.002181638
1377	Age-gain	MSigDB Predicted Promoter Motifs	V$NF1_Q6_01	Motif NTGGNNNNNNGCCAANN matches NF1: neurofibromin 1 (neurofibromatosis, von Recklinghausen disease, Watson disease)	1146	206.121	246	1.193474	0.04890656	0.2146597	60	146	245	0.001212854	0.002219956
1378	Age-gain	MSigDB Predicted Promoter Motifs	CTGYNNCTYTAA_UNKNOWN	Motif CTGYNNCTYTAA (no known TF)	598	107.557	137	1.273743	0.02723658	0.229097	27	50	82	0.001221069	0.00222836
1379	Age-gain	MSigDB Predicted Promoter Motifs	V$AP4_Q6_01	Motif RNCAGCTGC matches TFAP4: transcription factor AP-4 (activating enhancer binding protein 4)	1101	198.0272	237	1.196805	0.0471173	0.2152589	65	135	233	0.00126765	0.002306523
1380	Age-gain	MSigDB Predicted Promoter Motifs	V$HNF3ALPHA_Q6	Motif TRTTTGYTYWN matches FOXA1: forkhead box A1	2006	360.8017	412	1.141902	0.08190855	0.2053838	78	145	192	0.001281163	0.002324234
1381	Age-gain	MSigDB Predicted Promoter Motifs	V$EGR_Q6	Motif GTGGGSGCRRS matches EGR1: early growth response 1&lt;br&gt; EGR2: early growth response 2 (Krox-20 homolog, Drosophila)&lt;br&gt; EGR3: early growth response 3	1304	234.5391	276	1.176776	0.05487078	0.2116564	59	175	254	0.001483747	0.002683836
1382	Age-gain	MSigDB Predicted Promoter Motifs	V$ETS_Q4	Motif ANNCACTTCCTG matches ETS1: v-ets erythroblastosis virus E26 oncogene homolog 1 (avian)	1243	223.5675	264	1.180851	0.05248509	0.2123894	50	120	228	0.001527761	0.002755346
1383	Age-gain	MSigDB Predicted Promoter Motifs	RAAGNYNNCTTY_UNKNOWN	Motif RAAGNYNNCTTY (no known TF)	1317	236.8773	278	1.173603	0.05526839	0.2110858	50	98	135	0.001674331	0.003010858
1384	Age-gain	MSigDB Predicted Promoter Motifs	TGAYRTCA_V$ATF3_Q6	Motif TGAYRTCA matches ATF3: activating transcription factor 3	1794	322.6711	370	1.146678	0.07355865	0.206243	85	252	484	0.001682021	0.003015869
1385	Age-gain	MSigDB Predicted Promoter Motifs	YAATNANRNNNCAG_UNKNOWN	Motif YAATNANRNNNCAG (no known TF)	393	70.68548	94	1.329835	0.01868787	0.2391858	17	33	56	0.001741804	0.003113981
1386	Age-gain	MSigDB Predicted Promoter Motifs	V$AP2ALPHA_01	Motif GCCNNNRGS matches TFAP2A: transcription factor AP-2 alpha (activating enhancer binding protein 2 alpha)	1598	287.4183	332	1.155111	0.06600398	0.2077597	73	147	223	0.001800026	0.003208742
1387	Age-gain	MSigDB Predicted Promoter Motifs	AAAYWAACM_V$HFH4_01	Motif AAAYWAACM matches FOXJ1: forkhead box J1	2237	402.3496	454	1.128372	0.09025845	0.2029504	91	179	234	0.001872969	0.003329121
1388	Age-gain	MSigDB Predicted Promoter Motifs	V$AP1_Q2	Motif RSTGACTNANW matches JUN: jun oncogene	992	178.4224	214	1.199401	0.04254473	0.2157258	52	133	240	0.001902844	0.003372476
1389	Age-gain	MSigDB Predicted Promoter Motifs	TTCYNRGAA_V$STAT5B_01	Motif TTCYNRGAA matches STAT5B: signal transducer and activator of transcription 5B	1105	198.7467	236	1.187441	0.04691849	0.2135747	60	174	307	0.001973204	0.003487128
1390	Age-gain	MSigDB Predicted Promoter Motifs	V$EVI1_05	Motif AGATAAGATAN matches EVI1: ecotropic viral integration site 1	1526	274.4683	317	1.15496	0.06302187	0.2077326	58	113	160	0.002277347	0.00401309
1391	Age-gain	MSigDB Predicted Promoter Motifs	V$HP1SITEFACTOR_Q6	Motif AATWTTCAACAG (no known TF)	2192	394.2559	444	1.126172	0.08827038	0.2025547	74	158	215	0.00241917	0.004250827
1392	Age-gain	MSigDB Predicted Promoter Motifs	V$HFH4_01	Motif AWKTGTTTGTTTA matches FOXJ1: forkhead box J1	1915	344.4343	391	1.135195	0.0777336	0.2041775	75	138	184	0.002538079	0.004447061
1393	Age-gain	MSigDB Predicted Promoter Motifs	V$ISRE_01	Motif CAGTTTCWCTTTYCC matches STAT1: signal transducer and activator of transcription 1, 91kDa&lt;br&gt; STAT2: signal transducer and activator of transcription 2, 113kDa	1905	342.6357	389	1.135317	0.07733598	0.2041995	54	132	230	0.002581683	0.004510611
1394	Age-gain	MSigDB Predicted Promoter Motifs	V$DR3_Q4	Motif RRTGNMCYTNNTGAMCCNYNT matches VDR: vitamin D (1,25- dihydroxyvitamin D3) receptor	862	155.0404	187	1.206137	0.03717694	0.2169374	37	81	126	0.002749707	0.004790566
1395	Age-gain	MSigDB Predicted Promoter Motifs	CTTTAAR_UNKNOWN	Motif CTTTAAR (no known TF)	5274	948.5883	1019	1.074228	0.2025845	0.193212	244	533	870	0.002842503	0.004937781
1396	Age-gain	MSigDB Predicted Promoter Motifs	V$USF2_Q6	Motif CASGYG (no known TF)	883	158.8175	191	1.202638	0.03797217	0.216308	44	118	234	0.002850264	0.004937781
1397	Age-gain	MSigDB Predicted Promoter Motifs	V$CEBPA_01	Motif NNATTRCNNAANNN matches CEBPA: CCAAT/enhancer binding protein (C/EBP), alpha	2134	383.8239	432	1.125516	0.08588469	0.2024367	69	157	229	0.002873393	0.004963867
1398	Age-gain	MSigDB Predicted Promoter Motifs	V$HOXA3_01	Motif CNTANNNKN matches HOXA3: homeobox A3	110	19.78474	32	1.617408	0.006361829	0.2909091	6	10	13	0.002885456	0.004970744
1399	Age-gain	MSigDB Predicted Promoter Motifs	ACCTGTTG_UNKNOWN	Motif ACCTGTTG (no known TF)	950	170.8682	204	1.193903	0.04055666	0.2147368	35	80	143	0.002971152	0.005104074
1400	Age-gain	MSigDB Predicted Promoter Motifs	V$IRF2_01	Motif GAAAAGYGAAASY matches IRF2: interferon regulatory factor 2	1117	200.905	236	1.174684	0.04691849	0.2112802	26	66	118	0.003432273	0.005879799
1401	Age-gain	MSigDB Predicted Promoter Motifs	SMTTTTGT_UNKNOWN	Motif SMTTTTGT (no known TF)	3373	606.672	664	1.094496	0.132008	0.1968574	125	260	368	0.003538639	0.006045175
1402	Age-gain	MSigDB Predicted Promoter Motifs	V$IPF1_Q4	Motif GHNNTAATGACM matches IPF1: insulin promoter factor 1, homeodomain transcription factor	2500	449.6532	500	1.111968	0.09940358	0.2	77	162	226	0.003560343	0.006065404
1403	Age-gain	MSigDB Predicted Promoter Motifs	V$NFKB_Q6	Motif NGGGGAMTTTCCNN (no known TF)	1633	293.7134	335	1.140567	0.0666004	0.2051439	69	149	240	0.0037802	0.006410752
1404	Age-gain	MSigDB Predicted Promoter Motifs	AAAYRNCTG_UNKNOWN	Motif AAAYRNCTG (no known TF)	1874	337.06	381	1.130363	0.07574553	0.2033084	89	220	336	0.003783907	0.006410752
1405	Age-gain	MSigDB Predicted Promoter Motifs	V$FAC1_01	Motif NNNCAMAACACRNA matches FALZ: fetal Alzheimer antigen	2329	418.8969	467	1.114833	0.09284294	0.2005152	85	149	202	0.00398891	0.006739505
1406	Age-gain	MSigDB Predicted Promoter Motifs	V$E2F1_Q3_01	Motif TTGGCGCGRAANNGNM matches E2F1: E2F transcription factor 1	1746	314.0378	356	1.133622	0.07077535	0.2038946	70	156	226	0.004223113	0.007115656
1407	Age-gain	MSigDB Predicted Promoter Motifs	RNTCANNRNNYNATTW_UNKNOWN	Motif RNTCANNRNNYNATTW (no known TF)	508	91.36952	115	1.258625	0.02286282	0.226378	15	41	58	0.00427218	0.007178663
1408	Age-gain	MSigDB Predicted Promoter Motifs	V$FOXJ2_02	Motif AYMATAATATTTKN matches FOXJ2: forkhead box J2	2216	398.5726	445	1.116484	0.08846918	0.2008123	71	153	215	0.004423716	0.007413039
1409	Age-gain	MSigDB Predicted Promoter Motifs	V$GATA1_02	Motif NNNNNGATANKGNN matches GATA1: GATA binding protein 1 (globin transcription factor 1)	1612	289.9364	330	1.138181	0.06560636	0.2047146	72	144	221	0.004558499	0.007618144
1410	Age-gain	MSigDB Predicted Promoter Motifs	GGGNNTTTCC_V$NFKB_Q6_01	Motif GGGNNTTTCC (no known TF)	720	129.5001	157	1.212354	0.03121272	0.2180556	30	69	127	0.004664535	0.007774225
1411	Age-gain	MSigDB Predicted Promoter Motifs	YGACNNYACAR_UNKNOWN	Motif YGACNNYACAR (no known TF)	372	66.90839	87	1.300285	0.01729622	0.233871	20	49	86	0.004835165	0.008016636
1412	Age-gain	MSigDB Predicted Promoter Motifs	TGCCAAR_V$NF1_Q6	Motif TGCCAAR matches NF1: neurofibromin 1 (neurofibromatosis, von Recklinghausen disease, Watson disease)	4067	731.4957	791	1.081346	0.1572565	0.1944923	165	407	660	0.004836052	0.008016636
1413	Age-gain	MSigDB Predicted Promoter Motifs	V$ERR1_Q2	Motif NNNTNAAGGTCANN matches ESRRA: estrogen-related receptor alpha	1258	226.2655	261	1.153512	0.05188867	0.2074722	56	144	239	0.005645714	0.00933364
1414	Age-gain	MSigDB Predicted Promoter Motifs	V$PAX5_02	Motif RRMSWGANWYCTNRAGCGKRACSRYNSM matches PAX5: paired box gene 5 (B-cell lineage specific activator)	202	36.33197	51	1.403722	0.01013917	0.2524752	4	11	16	0.006018169	0.009922718
1415	Age-gain	MSigDB Predicted Promoter Motifs	CYTAGCAAY_UNKNOWN	Motif CYTAGCAAY (no known TF)	494	88.85146	111	1.249276	0.02206759	0.2246964	20	61	132	0.006235765	0.01
1416	Age-gain	MSigDB Predicted Promoter Motifs	V$TEF1_Q6	Motif GRRATG (no known TF)	1069	192.2717	224	1.165018	0.0445328	0.2095416	50	116	203	0.006287514	0.01
1417	Age-gain	MSigDB Predicted Promoter Motifs	V$RFX1_01	Motif NNGTNRCNWRGYAACNN matches RFX1: regulatory factor X, 1 (influences HLA class II expression)	1266	227.7044	262	1.150615	0.05208748	0.206951	47	129	229	0.006308113	0.01
1418	Age-gain	MSigDB Predicted Promoter Motifs	V$PAX4_04	Motif RAAAAWTANNNNNNNNNNNNNNNYCACNCC matches PAX4: paired box gene 4	2474	444.9768	491	1.103428	0.09761431	0.198464	79	150	200	0.006717928	0.01
1419	Age-gain	MSigDB Predicted Promoter Motifs	V$YY1_01	Motif NNNNNCCATNTWNNNWN matches YY1: YY1 transcription factor	1660	298.5697	337	1.128715	0.06699801	0.203012	60	150	220	0.006780489	0.01
1420	Age-gain	MSigDB Predicted Promoter Motifs	MCAATNNNNNGCG_UNKNOWN	Motif MCAATNNNNNGCG (no known TF)	466	83.81535	105	1.252754	0.02087475	0.2253219	24	47	78	0.007018023	0.01
1421	Age-gain	MSigDB Predicted Promoter Motifs	V$SOX5_01	Motif NNAACAATNN matches SOX5: SRY (sex determining region Y)-box 5	2704	486.3448	533	1.09593	0.1059642	0.1971154	86	174	242	0.007969227	0.01
1422	Age-gain	MSigDB Predicted Promoter Motifs	V$TCF11_01	Motif GTCATNNWNNNNN matches NFE2L1: nuclear factor (erythroid-derived 2)-like 1	2056	369.7948	411	1.111427	0.08170974	0.1999027	75	169	229	0.008127211	0.01
1423	Age-gain	MSigDB Predicted Promoter Motifs	V$RSRFC4_01	Motif RNKCTATTTWTAGMWN matches MEF2A: MADS box transcription enhancer factor 2, polypeptide A (myocyte enhancer factor 2A)	1289	231.8412	265	1.143024	0.0526839	0.2055857	52	131	225	0.008373658	0.01
1424	Age-gain	MSigDB Predicted Promoter Motifs	V$PAX5_01	Motif BCNNNRNGCANBGNTGNRTAGCSGCHNB matches PAX5: paired box gene 5 (B-cell lineage specific activator)	1150	206.8404	238	1.150645	0.0473161	0.2069565	42	95	136	0.00889893	0.01
1425	Age-gain	MSigDB Predicted Promoter Motifs	V$GATA3_01	Motif NNGATARNG matches GATA3: GATA binding protein 3	1605	288.6773	325	1.125824	0.06461233	0.2024922	70	145	217	0.008901121	0.01
1426	Age-gain	MSigDB Predicted Promoter Motifs	V$CART1_01	Motif NNNTAATTNNCATTANCN matches CART1: cartilage paired-class homeoprotein 1	2479	445.8761	490	1.09896	0.09741551	0.1976603	76	147	199	0.008940899	0.01
1427	Age-gain	MSigDB Predicted Promoter Motifs	V$HFH3_01	Motif KNNTRTTTRTTTA matches FOXI1: forkhead box I1	1671	300.5482	337	1.121285	0.06699801	0.2016756	68	133	176	0.009773406	0.02
1428	Age-gain	MSigDB Predicted Promoter Motifs	V$EGR1_01	Motif WTGCGTGGGCGK matches EGR1: early growth response 1	1561	280.7634	315	1.121941	0.06262425	0.2017937	70	167	255	0.01183731	0.02
1429	Age-gain	MSigDB Predicted Promoter Motifs	V$FOXD3_01	Motif NAWTGTTTRTTT matches FOXD3: forkhead box D3	2171	390.4788	430	1.101212	0.08548708	0.1980654	79	150	188	0.01223413	0.02
1430	Age-gain	MSigDB Predicted Promoter Motifs	V$RFX1_02	Motif NNGTNRCNATRGYAACNN matches RFX1: regulatory factor X, 1 (influences HLA class II expression)	905	162.7744	189	1.161116	0.03757455	0.2088398	40	128	248	0.01287524	0.02
1431	Age-gain	MSigDB Predicted Promoter Motifs	STTTCRNTTT_V$IRF_Q6	Motif STTTCRNTTT (no known TF)	1323	237.9564	269	1.130459	0.05347913	0.2033258	43	99	174	0.01343814	0.02
1432	Age-gain	MSigDB Predicted Promoter Motifs	GGCNNMSMYNTTG_UNKNOWN	Motif GGCNNMSMYNTTG (no known TF)	337	60.61324	77	1.270349	0.01530815	0.2284866	15	39	66	0.01345984	0.02
1433	Age-gain	MSigDB Predicted Promoter Motifs	V$CP2_02	Motif GCTGGNTNGNNCYNG matches TFCP2: transcription factor CP2	1691	304.1454	338	1.111311	0.06719682	0.1998817	66	156	233	0.01550024	0.02
1434	Age-gain	MSigDB Predicted Promoter Motifs	AACWWCAANK_UNKNOWN	Motif AACWWCAANK (no known TF)	1029	185.0772	212	1.145468	0.04214712	0.2060253	42	76	128	0.01552263	0.02
1435	Age-gain	MSigDB Predicted Promoter Motifs	V$ER_Q6_01	Motif KDMAYYNTGACCT matches AR: androgen receptor (dihydrotestosterone receptor; testicular feminization; spinal and bulbar muscular atrophy; Kennedy disease)	1762	316.9155	351	1.107551	0.06978131	0.1992054	67	158	239	0.01652423	0.03
1436	Age-gain	MSigDB Predicted Promoter Motifs	V$AREB6_01	Motif NNYNYACCTGWVT matches TCF8: transcription factor 8 (represses interleukin 2 expression)	1335	240.1148	269	1.120298	0.05347913	0.2014981	65	139	244	0.02013649	0.03
1437	Age-gain	MSigDB Predicted Promoter Motifs	V$STAT5B_01	Motif NAWTTCYNGGAAWTN matches STAT5B: signal transducer and activator of transcription 5B	1094	196.7682	223	1.133313	0.044334	0.2038391	54	132	226	0.02056445	0.03
1438	Age-gain	MSigDB Predicted Promoter Motifs	V$MYOD_01	Motif SRACAGGTGKYG matches MYOD1: myogenic differentiation 1	761	136.8744	159	1.161649	0.03161034	0.2089356	53	135	238	0.02066656	0.03
1439	Age-gain	MSigDB Predicted Promoter Motifs	V$AREB6_04	Motif CBGTTTSNN matches TCF8: transcription factor 8 (represses interleukin 2 expression)	2015	362.4204	397	1.095413	0.07892644	0.1970223	82	162	235	0.02091526	0.03
1440	Age-gain	MSigDB Predicted Promoter Motifs	KMCATNNWGGA_UNKNOWN	Motif KMCATNNWGGA (no known TF)	819	147.3064	170	1.154057	0.03379722	0.2075702	24	52	80	0.02159332	0.03
1441	Age-gain	MSigDB Predicted Promoter Motifs	V$MAZ_Q6	Motif GGGGAGGG matches MAZ: MYC-associated zinc finger protein (purine-binding transcription factor)	1243	223.5675	251	1.122703	0.0499006	0.2019308	48	115	175	0.02205646	0.03
1442	Age-gain	MSigDB Predicted Promoter Motifs	V$CREL_01	Motif SGGRNTTTCC matches REL: v-rel reticuloendotheliosis viral oncogene homolog (avian)	1283	230.762	258	1.118035	0.05129225	0.2010912	59	146	243	0.02443877	0.04
1443	Age-gain	MSigDB Predicted Promoter Motifs	TGTYNNNNNRGCARM_UNKNOWN	Motif TGTYNNNNNRGCARM (no known TF)	591	106.298	125	1.175939	0.02485089	0.2115059	24	48	78	0.02611932	0.04
1444	Age-gain	MSigDB Predicted Promoter Motifs	TGCGCANK_UNKNOWN	Motif TGCGCANK (no known TF)	1774	319.0739	350	1.096925	0.0695825	0.1972943	86	270	498	0.02694038	0.04
1445	Age-gain	MSigDB Predicted Promoter Motifs	V$MYCMAX_01	Motif NNACCACGTGGTNN matches MYC: v-myc myelocytomatosis viral oncogene homolog (avian)&lt;br&gt; MAX: MYC associated factor X	951	171.0481	194	1.134184	0.03856859	0.2039958	56	134	234	0.02826086	0.04
1446	Age-gain	MSigDB Predicted Promoter Motifs	CTCNANGTGNY_UNKNOWN	Motif CTCNANGTGNY (no known TF)	831	149.4647	171	1.144083	0.03399602	0.2057762	20	53	82	0.02835627	0.04
1447	Age-gain	MSigDB Predicted Promoter Motifs	V$NRSF_01	Motif TTCAGCACCACGGACAGMGCC matches REST: RE1-silencing transcription factor	349	62.77158	77	1.22667	0.01530815	0.2206304	29	60	91	0.02937508	0.04
1448	Age-gain	MSigDB Predicted Promoter Motifs	TGACAGNY_V$MEIS1_01	Motif TGACAGNY matches MEIS1: Meis1, myeloid ecotropic viral integration site 1 homolog (mouse)	5212	937.4369	985	1.050737	0.195825	0.188987	220	502	755	0.03038951	0.05
1449	Age-gain	MSigDB Predicted Promoter Motifs	RYCACNNRNNRNCAG_UNKNOWN	Motif RYCACNNRNNRNCAG (no known TF)	584	105.039	123	1.170994	0.02445328	0.2106164	23	47	65	0.03042984	0.05
1450	Age-gain	MSigDB Predicted Promoter Motifs	V$AMEF2_Q6	Motif CKGDYTAAAAATAACYMM (no known TF)	1478	265.8349	293	1.102188	0.0582505	0.1982409	72	155	234	0.0328684	0.05
1451	Age-gain	MSigDB Predicted Promoter Motifs	V$FOXO3_01	Motif TNNTTGTTTACNTW matches FOXO3A: forkhead box O3A	2023	363.8593	395	1.085584	0.07852883	0.1952546	80	160	226	0.03369593	0.05
1452	Age-gain	MSigDB Predicted Promoter Motifs	V$DBP_Q6	Motif AGCAHAC matches DBP: D site of albumin promoter (albumin D-box) binding protein	2127	382.5649	414	1.082169	0.08230616	0.1946403	80	146	229	0.03552154	0.05
1453	Age-gain	MSigDB Predicted Promoter Motifs	V$E47_01	Motif VSNGCAGGTGKNCNN matches TCF3: transcription factor 3 (E2A immunoglobulin enhancer binding factors E12/E47)	1179	212.0564	236	1.112911	0.04691849	0.2001696	60	140	229	0.03593212	0.05
1454	Age-loss	GO Molecular Function	GO:0050699	WW domain binding	33	1.797147	10	5.564377	0.006565988	0.3030303	3	9	19	6.51E-06	0.02
1455	Age-loss	GO Molecular Function	GO:0016627	oxidoreductase activity, acting on the CH-CH group of donors	63	3.430916	13	3.789075	0.008535785	0.2063492	5	10	51	2.87E-05	0.04
1456	Age-loss	GO Molecular Function	GO:0003779	actin binding	626	34.09133	59	1.730646	0.03873933	0.0942492	37	152	338	3.19E-05	0.04
1457	Age-loss	GO Biological Process	GO:0034333	adherens junction assembly	142	7.733176	26	3.362137	0.01707157	0.1830986	6	12	21	4.83E-08	0.000332527
1458	Age-loss	GO Biological Process	GO:0001935	endothelial cell proliferation	108	5.88157	22	3.740498	0.01444517	0.2037037	3	8	14	7.16E-08	0.000332527
1459	Age-loss	GO Biological Process	GO:0030048	actin filament-based movement	119	6.480619	23	3.549044	0.01510177	0.1932773	7	20	29	1.01E-07	0.000332527
1460	Age-loss	GO Biological Process	GO:0034332	adherens junction organization	150	8.168848	26	3.182823	0.01707157	0.1733333	6	16	27	1.51E-07	0.000332527
1461	Age-loss	GO Biological Process	GO:0034111	negative regulation of homotypic cell-cell adhesion	104	5.663735	21	3.707801	0.01378858	0.2019231	3	3	10	1.65E-07	0.000332527
1462	Age-loss	GO Biological Process	GO:0010718	positive regulation of epithelial to mesenchymal transition	200	10.8918	30	2.754366	0.01969796	0.15	7	18	22	4.65E-07	0.000780783
1463	Age-loss	GO Biological Process	GO:0034110	regulation of homotypic cell-cell adhesion	113	6.153865	21	3.412489	0.01378858	0.1858407	3	8	19	7.10E-07	0.001020523
1464	Age-loss	GO Biological Process	GO:0033601	positive regulation of mammary gland epithelial cell proliferation	96	5.228063	19	3.634233	0.01247538	0.1979167	1	4	5	8.74E-07	0.001100239
1465	Age-loss	GO Biological Process	GO:0080135	regulation of cellular response to stress	1167	63.55364	101	1.589209	0.06631648	0.0865467	35	157	310	2.81E-06	0.003139713
1466	Age-loss	GO Biological Process	GO:0034224	cellular response to zinc ion starvation	10	0.5445899	6	11.01747	0.003939593	0.6	1	1	2	4.49E-06	0.004517826
1467	Age-loss	GO Biological Process	GO:0030029	actin filament-based process	819	44.60191	75	1.681542	0.04924491	0.09157509	36	157	312	7.95E-06	0.006648112
1468	Age-loss	GO Biological Process	GO:0006685	sphingomyelin catabolic process	7	0.3812129	5	13.11603	0.003282994	0.7142857	1	1	5	9.11E-06	0.006648112
1469	Age-loss	GO Biological Process	GO:0050760	negative regulation of thymidylate synthase biosynthetic process	7	0.3812129	5	13.11603	0.003282994	0.7142857	1	1	1	9.11E-06	0.006648112
1470	Age-loss	GO Biological Process	GO:0002367	cytokine production involved in immune response	11	0.5990488	6	10.01588	0.003939593	0.5454545	2	3	10	9.41E-06	0.006648112
1471	Age-loss	GO Biological Process	GO:0090287	regulation of cellular response to growth factor stimulus	810	44.11178	74	1.677556	0.04858831	0.09135802	31	84	131	9.90E-06	0.006648112
1472	Age-loss	GO Biological Process	GO:0046916	cellular transition metal ion homeostasis	61	3.321998	13	3.913307	0.008535785	0.2131148	5	18	68	1.99E-05	0.01
1473	Age-loss	GO Biological Process	GO:0034329	cell junction assembly	331	18.02592	37	2.052599	0.02429416	0.1117825	16	38	64	2.93E-05	0.02
1474	Age-loss	GO Biological Process	GO:0030323	respiratory tube development	1280	69.7075	104	1.491948	0.06828628	0.08125	42	107	173	2.93E-05	0.02
1475	Age-loss	GO Biological Process	GO:0055076	transition metal ion homeostasis	101	5.500358	17	3.090708	0.01116218	0.1683168	8	30	96	3.07E-05	0.02
1476	Age-loss	GO Biological Process	GO:0017015	regulation of transforming growth factor beta receptor signaling pathway	449	24.45208	46	1.88123	0.03020355	0.1024499	18	46	70	3.17E-05	0.02
1477	Age-loss	GO Biological Process	GO:0030432	peristalsis	156	8.495602	22	2.589575	0.01444517	0.1410256	2	6	9	4.02E-05	0.02
1478	Age-loss	GO Biological Process	GO:0051654	establishment of mitochondrion localization	48	2.614031	11	4.20806	0.007222587	0.2291667	2	4	7	4.21E-05	0.02
1479	Age-loss	GO Biological Process	GO:0001701	in utero embryonic development	1730	94.21405	132	1.401065	0.08667104	0.07630058	52	211	387	5.05E-05	0.02
1480	Age-loss	GO Biological Process	GO:0048745	smooth muscle tissue development	433	23.58074	44	1.865929	0.02889035	0.1016166	8	18	20	5.64E-05	0.02
1481	Age-loss	GO Biological Process	GO:0034330	cell junction organization	395	21.5113	41	1.905975	0.02692055	0.1037975	20	59	99	6.22E-05	0.02
1482	Age-loss	GO Biological Process	GO:0045216	cell-cell junction organization	382	20.80333	40	1.922769	0.02626395	0.104712	19	52	89	6.26E-05	0.02
1483	Age-loss	GO Biological Process	GO:0022408	negative regulation of cell-cell adhesion	197	10.72842	25	2.330259	0.01641497	0.1269036	5	14	31	7.43E-05	0.03
1484	Age-loss	GO Biological Process	GO:0051053	negative regulation of DNA metabolic process	130	7.079668	19	2.683742	0.01247538	0.1461538	11	28	62	8.07E-05	0.03
1485	Age-loss	GO Biological Process	GO:0045859	regulation of protein kinase activity	1422	77.44068	111	1.433355	0.07288247	0.07805907	53	242	473	8.29E-05	0.03
1486	Age-loss	GO Biological Process	GO:0006882	cellular zinc ion homeostasis	15	0.8168848	6	7.344977	0.003939593	0.4	1	4	14	8.44E-05	0.03
1487	Age-loss	GO Biological Process	GO:0055069	zinc ion homeostasis	15	0.8168848	6	7.344977	0.003939593	0.4	1	4	15	8.44E-05	0.03
1488	Age-loss	GO Biological Process	GO:0051150	regulation of smooth muscle cell differentiation	200	10.8918	25	2.295305	0.01641497	0.125	6	10	15	9.51E-05	0.03
1489	Age-loss	GO Biological Process	GO:0030149	sphingolipid catabolic process	10	0.5445899	5	9.181221	0.003282994	0.5	1	3	15	9.52E-05	0.03
1490	Age-loss	GO Biological Process	GO:0046466	membrane lipid catabolic process	10	0.5445899	5	9.181221	0.003282994	0.5	1	3	16	9.52E-05	0.03
1491	Age-loss	GO Biological Process	GO:0043408	regulation of MAPK cascade	1521	82.83212	117	1.412496	0.07682206	0.07692308	54	227	433	9.77E-05	0.03
1492	Age-loss	GO Biological Process	GO:0001932	regulation of protein phosphorylation	2141	116.5967	156	1.337945	0.1024294	0.07286315	86	355	712	0.000105811	0.03
1493	Age-loss	GO Biological Process	GO:0051052	regulation of DNA metabolic process	543	29.57123	51	1.724649	0.03348654	0.09392265	26	91	205	0.000116132	0.03
1494	Age-loss	GO Biological Process	GO:2001022	positive regulation of response to DNA damage stimulus	239	13.0157	28	2.151248	0.01838477	0.1171548	5	21	51	0.000117346	0.03
1495	Age-loss	GO Biological Process	GO:0010155	regulation of proton transport	37	2.014982	9	4.46654	0.005909389	0.2432432	4	5	12	0.000127794	0.03
1496	Age-loss	GO Biological Process	GO:0061515	myeloid cell development	228	12.41665	27	2.1745	0.01772817	0.1184211	8	21	34	0.000128632	0.03
1497	Age-loss	GO Biological Process	GO:0043549	regulation of kinase activity	1518	82.66874	116	1.403191	0.07616546	0.07641634	57	261	510	0.000136394	0.03
1498	Age-loss	GO Biological Process	GO:0010717	regulation of epithelial to mesenchymal transition	321	17.48133	34	1.944932	0.02232436	0.105919	11	31	38	0.000172829	0.04
1499	Age-loss	GO Biological Process	GO:0047497	mitochondrion transport along microtubule	17	0.9258028	6	6.480862	0.003939593	0.3529412	1	3	5	0.000189946	0.04
1500	Age-loss	GO Biological Process	GO:0080134	regulation of response to stress	1832	99.76886	135	1.353128	0.08864084	0.07368996	57	260	630	0.000194356	0.04
1501	Age-loss	GO Biological Process	GO:0072194	kidney smooth muscle tissue development	151	8.223307	20	2.432112	0.01313198	0.1324503	2	3	3	0.000210888	0.05
1502	Age-loss	GO Biological Process	GO:0046328	regulation of JNK cascade	614	33.43782	55	1.644844	0.03611293	0.08957655	20	76	130	0.000217527	0.05
1503	Age-loss	GO Biological Process	GO:0051338	regulation of transferase activity	1540	83.86684	116	1.383145	0.07616546	0.07532468	57	267	532	0.000239591	0.05
1504	Age-loss	GO Biological Process	GO:2001020	regulation of response to DNA damage stimulus	421	22.92723	41	1.788266	0.02692055	0.09738717	11	44	101	0.000246781	0.05
1505	Age-loss	GO Biological Process	GO:0043517	positive regulation of DNA damage response, signal transduction by p53 class mediator	77	4.193342	13	3.100153	0.008535785	0.1688312	2	6	12	0.000247999	0.05
1506	Age-loss	GO Biological Process	GO:1901798	positive regulation of signal transduction by p53 class mediator	77	4.193342	13	3.100153	0.008535785	0.1688312	2	6	14	0.000247999	0.05
1507	Age-loss	GO Biological Process	GO:0043409	negative regulation of MAPK cascade	263	14.32271	29	2.024756	0.01904137	0.1102662	14	56	103	0.000256413	0.05
1508	Age-loss	GO Biological Process	GO:0035095	behavioral response to nicotine	7	0.3812129	4	10.49282	0.002626395	0.5714286	2	5	8	0.000268503	0.05
1509	Age-loss	GO Biological Process	GO:0042325	regulation of phosphorylation	2267	123.4585	161	1.304082	0.1057124	0.07101897	90	386	775	0.000278988	0.05
1510	Age-loss	GO Cellular Component	GO:0045298	tubulin complex	11	0.5990488	7	11.68519	0.004596192	0.6363636	2	2	4	3.81E-07	0.000459555
1511	Age-loss	GO Cellular Component	GO:0030027	lamellipodium	384	20.91225	43	2.056211	0.02823375	0.1119792	23	76	123	6.58E-06	0.003966941
1512	Age-loss	GO Cellular Component	GO:0031010	ISWI-type complex	17	0.9258028	7	7.561006	0.004596192	0.4117647	3	5	8	1.68E-05	0.006754247
1513	Age-loss	GO Cellular Component	GO:0000781	chromosome, telomeric region	78	4.247801	14	3.295823	0.009192383	0.1794872	5	13	48	7.32E-05	0.02
1514	Age-loss	GO Cellular Component	GO:0031213	RSF complex	6	0.3267539	4	12.24163	0.002626395	0.6666667	2	2	2	0.00012028	0.03
1515	Age-loss	GO Cellular Component	GO:0071339	MLL1 complex	63	3.430916	12	3.497608	0.007879186	0.1904762	4	15	28	0.000130857	0.03
1516	Age-loss	GO Cellular Component	GO:0071565	nBAF complex	96	5.228063	15	2.869132	0.009848982	0.15625	4	11	12	0.000208595	0.04
1517	Age-loss	GO Cellular Component	GO:0090544	BAF-type complex	97	5.282522	15	2.839553	0.009848982	0.1546392	4	12	15	0.000234509	0.04
1518	Age-loss	GO Cellular Component	GO:0016605	PML body	523	28.48205	48	1.685272	0.03151674	0.0917782	15	42	80	0.000308993	0.04
1519	Age-loss	GO Cellular Component	GO:0071944	cell periphery	7043	383.5546	439	1.144557	0.2882469	0.06233139	301	1503	4791	0.000494456	0.05
1520	Age-loss	GO Cellular Component	GO:0005886	plasma membrane	6903	375.9304	431	1.146489	0.2829941	0.06243662	295	1463	4681	0.000497352	0.05
1521	Age-loss	MSigDB Pathway	PID_P38GAMMADELTAPATHWAY	Signaling mediated by p38-gamma and p38-delta	22	1.198098	9	7.511908	0.005909389	0.4090909	4	7	10	1.07E-06	0.001414593
1522	Age-loss	MSigDB Pathway	BIOCARTA_CERAMIDE_PATHWAY	Ceramide Signaling Pathway	24	1.307016	8	6.120814	0.005252791	0.3333333	2	7	22	2.55E-05	0.02
1523	Age-loss	MSigDB Pathway	BIOCARTA_BIOPEPTIDES_PATHWAY	Bioactive Peptide Induced Signaling Pathway	93	5.064686	16	3.15913	0.01050558	0.172043	7	23	41	3.95E-05	0.02
1524	Age-loss	MSigDB Pathway	PID_ECADHERIN_NASCENTAJ_PATHWAY	E-cadherin signaling in the nascent adherens junction	155	8.441143	21	2.487815	0.01378858	0.1354839	8	28	39	0.000107129	0.03
1525	Age-loss	MSigDB Pathway	KEGG_ADHERENS_JUNCTION	Adherens junction	393	21.40238	40	1.868951	0.02626395	0.1017812	17	52	73	0.000116019	0.03
1526	Age-loss	MSigDB Pathway	PID_TNFPATHWAY	TNF receptor signaling pathway	96	5.228063	15	2.869132	0.009848982	0.15625	6	21	45	0.000208595	0.05
1527	Age-loss	MSigDB Pathway	REACTOME_ZINC_TRANSPORTERS	Genes involved in Zinc transporters	18	0.9802617	6	6.120814	0.003939593	0.3333333	1	5	15	0.000271819	0.05
1528	Age-loss	MSigDB Pathway	REACTOME_CASPASE_MEDIATED_CLEAVAGE_OF_CYTOSKELETAL_PROTEINS	Genes involved in Caspase-mediated cleavage of cytoskeletal proteins	25	1.361475	7	5.141484	0.004596192	0.28	2	5	12	0.000282717	0.05
1529	Weight-CpG	GO Molecular Function	GO:0005515	protein binding	18211	477.3176	539	1.129227	0.7353342	0.0295975	406	2963	6457	4.67E-07	0.001628597
1530	Weight-CpG	GO Molecular Function	GO:0003824	catalytic activity	9916	259.9023	320	1.231232	0.4365621	0.03227108	241	2094	5557	2.10E-06	0.003206212
1531	Weight-CpG	GO Molecular Function	GO:0004767	sphingomyelin phosphodiesterase activity	10	0.262104	5	19.0764	0.006821282	0.5	1	3	8	2.76E-06	0.003206212
1532	Weight-CpG	GO Molecular Function	GO:0080025	phosphatidylinositol-3,5-bisphosphate binding	78	2.044411	11	5.380523	0.01500682	0.1410256	3	7	13	5.87E-06	0.005118914
1533	Weight-CpG	GO Molecular Function	GO:0070300	phosphatidic acid binding	56	1.467782	9	6.131699	0.01227831	0.1607143	2	3	5	1.40E-05	0.009765557
1534	Weight-CpG	GO Molecular Function	GO:0005547	phosphatidylinositol-3,4,5-trisphosphate binding	139	3.643245	13	3.568247	0.01773533	0.09352518	5	14	22	7.82E-05	0.04
1535	Weight-CpG	GO Molecular Function	GO:0019899	enzyme binding	3039	79.6534	113	1.418646	0.154161	0.03718328	74	495	984	8.28E-05	0.04
1536	Weight-CpG	GO Molecular Function	GO:0047276	N-acetyllactosaminide 3-alpha-galactosyltransferase activity	19	0.4979976	5	10.04021	0.006821282	0.2631579	1	2	2	0.000104534	0.04
1537	Weight-CpG	GO Molecular Function	GO:0042813	Wnt-activated receptor activity	58	1.520203	8	5.262455	0.01091405	0.137931	5	14	19	0.000129212	0.04
1538	Weight-CpG	GO Molecular Function	GO:0035613	RNA stem-loop binding	31	0.8125223	6	7.384412	0.008185539	0.1935484	1	3	4	0.000133617	0.04
1539	Weight-CpG	GO Molecular Function	GO:0043325	phosphatidylinositol-3,4-bisphosphate binding	91	2.385146	10	4.192615	0.01364256	0.1098901	3	8	15	0.000136799	0.04
1540	Weight-CpG	GO Molecular Function	GO:0017147	Wnt-protein binding	76	1.99199	9	4.518094	0.01227831	0.1184211	6	16	28	0.000165257	0.05
1541	Weight-CpG	GO Molecular Function	GO:0016881	acid-amino acid ligase activity	1061	27.80923	48	1.726045	0.06548431	0.04524034	21	150	287	0.00019217	0.05
1542	Weight-CpG	GO Biological Process	GO:0030048	actin filament-based movement	119	3.119037	19	6.091623	0.02592087	0.1596639	4	20	29	3.00E-10	3.02E-06
1543	Weight-CpG	GO Biological Process	GO:0044267	cellular protein metabolic process	6240	163.5529	232	1.418501	0.3165075	0.03717949	154	1176	2608	2.15E-09	8.36E-06
1544	Weight-CpG	GO Biological Process	GO:0019538	protein metabolic process	6932	181.6905	252	1.386974	0.3437926	0.03635314	168	1369	3258	2.49E-09	8.36E-06
1545	Weight-CpG	GO Biological Process	GO:0006464	cellular protein modification process	5372	140.8023	204	1.44884	0.2783083	0.03797468	130	965	1979	6.22E-09	1.56E-05
1546	Weight-CpG	GO Biological Process	GO:0072673	lamellipodium morphogenesis	54	1.415362	12	8.478399	0.01637108	0.2222222	1	3	4	1.20E-08	2.42E-05
1547	Weight-CpG	GO Biological Process	GO:0016601	Rac protein signal transduction	57	1.493993	12	8.032168	0.01637108	0.2105263	1	3	11	2.31E-08	3.34E-05
1548	Weight-CpG	GO Biological Process	GO:0043412	macromolecule modification	5661	148.3771	210	1.415313	0.2864939	0.03709592	132	999	2084	2.32E-08	3.34E-05
1549	Weight-CpG	GO Biological Process	GO:0006897	endocytosis	629	16.48634	42	2.547564	0.05729877	0.06677266	16	121	269	3.86E-08	4.86E-05
1550	Weight-CpG	GO Biological Process	GO:0030219	megakaryocyte differentiation	119	3.119037	16	5.129788	0.0218281	0.1344538	4	14	16	9.24E-08	0.000103397
1551	Weight-CpG	GO Biological Process	GO:0006685	sphingomyelin catabolic process	7	0.1834728	5	27.252	0.006821282	0.7142857	1	1	5	2.45E-07	0.000224548
1552	Weight-CpG	GO Biological Process	GO:0050760	negative regulation of thymidylate synthase biosynthetic process	7	0.1834728	5	27.252	0.006821282	0.7142857	1	1	1	2.45E-07	0.000224548
1553	Weight-CpG	GO Biological Process	GO:0016567	protein ubiquitination	1277	33.47068	64	1.912121	0.08731241	0.05011746	28	218	443	6.05E-07	0.00050801
1554	Weight-CpG	GO Biological Process	GO:0009247	glycolipid biosynthetic process	66	1.729886	11	6.358799	0.01500682	0.1666667	3	17	42	1.08E-06	0.000834357
1555	Weight-CpG	GO Biological Process	GO:0006643	membrane lipid metabolic process	146	3.826718	16	4.181128	0.0218281	0.109589	4	50	126	1.55E-06	0.001114771
1556	Weight-CpG	GO Biological Process	GO:0000054	ribosomal subunit export from nucleus	16	0.4193664	6	14.3073	0.008185539	0.375	1	2	3	2.03E-06	0.001278871
1557	Weight-CpG	GO Biological Process	GO:0000056	ribosomal small subunit export from nucleus	16	0.4193664	6	14.3073	0.008185539	0.375	1	2	2	2.03E-06	0.001278871
1558	Weight-CpG	GO Biological Process	GO:0035855	megakaryocyte development	100	2.62104	13	4.959864	0.01773533	0.13	2	11	11	2.17E-06	0.001284523
1559	Weight-CpG	GO Biological Process	GO:0016055	Wnt receptor signaling pathway	1192	31.24279	59	1.888435	0.08049113	0.04949664	32	149	225	2.51E-06	0.001387796
1560	Weight-CpG	GO Biological Process	GO:0030149	sphingolipid catabolic process	10	0.262104	5	19.0764	0.006821282	0.5	1	3	15	2.76E-06	0.001387796
1561	Weight-CpG	GO Biological Process	GO:0046466	membrane lipid catabolic process	10	0.262104	5	19.0764	0.006821282	0.5	1	3	16	2.76E-06	0.001387796
1562	Weight-CpG	GO Biological Process	GO:0030029	actin filament-based process	819	21.46632	45	2.096308	0.06139154	0.05494505	23	157	312	2.96E-06	0.001405518
1563	Weight-CpG	GO Biological Process	GO:0071166	ribonucleoprotein complex localization	17	0.4455768	6	13.46569	0.008185539	0.3529412	1	3	4	3.07E-06	0.001405518
1564	Weight-CpG	GO Biological Process	GO:0030032	lamellipodium assembly	107	2.804513	13	4.635387	0.01773533	0.1214953	2	14	26	4.67E-06	0.002045167
1565	Weight-CpG	GO Biological Process	GO:0030031	cell projection assembly	411	10.77247	28	2.599217	0.03819918	0.06812652	11	69	166	4.91E-06	0.002058937
1566	Weight-CpG	GO Biological Process	GO:0051168	nuclear export	129	3.381141	14	4.140614	0.01909959	0.1085271	6	27	62	7.74E-06	0.003115943
1567	Weight-CpG	GO Biological Process	GO:0006664	glycolipid metabolic process	82	2.149253	11	5.118058	0.01500682	0.1341463	3	26	64	9.61E-06	0.003720832
1568	Weight-CpG	GO Biological Process	GO:0070647	protein modification by small protein conjugation or removal	1699	44.53147	74	1.661746	0.100955	0.04355503	36	272	548	1.32E-05	0.004908404
1569	Weight-CpG	GO Biological Process	GO:0046467	membrane lipid biosynthetic process	91	2.385146	11	4.611877	0.01500682	0.1208791	3	27	72	2.62E-05	0.009119673
1570	Weight-CpG	GO Biological Process	GO:0032446	protein modification by small protein conjugation	1467	38.45065	65	1.690478	0.08867667	0.04430811	29	234	474	2.71E-05	0.009119673
1571	Weight-CpG	GO Biological Process	GO:0035306	positive regulation of dephosphorylation	24	0.6290496	6	9.538199	0.008185539	0.25	2	8	16	2.86E-05	0.009119673
1572	Weight-CpG	GO Biological Process	GO:0035307	positive regulation of protein dephosphorylation	24	0.6290496	6	9.538199	0.008185539	0.25	2	8	15	2.86E-05	0.009119673
1573	Weight-CpG	GO Biological Process	GO:0006810	transport	6100	159.8834	206	1.288439	0.2810368	0.03377049	148	1251	2845	2.90E-05	0.009119673
1574	Weight-CpG	GO Biological Process	GO:0051234	establishment of localization	6212	162.819	209	1.283634	0.2851296	0.03364456	151	1280	2900	3.12E-05	0.009530961
1575	Weight-CpG	GO Biological Process	GO:0061515	myeloid cell development	228	5.975971	18	3.012063	0.02455662	0.07894737	6	21	34	3.59E-05	0.01
1576	Weight-CpG	GO Biological Process	GO:0060070	canonical Wnt receptor signaling pathway	437	11.45394	27	2.357267	0.03683492	0.0617849	12	62	87	4.05E-05	0.01
1577	Weight-CpG	GO Biological Process	GO:0016192	vesicle-mediated transport	1694	44.40041	71	1.599084	0.09686221	0.04191263	43	313	679	6.69E-05	0.02
1578	Weight-CpG	GO Biological Process	GO:0006996	organelle organization	5165	135.3767	176	1.300076	0.2401091	0.03407551	119	894	2001	8.75E-05	0.02
1579	Weight-CpG	GO Biological Process	GO:0044703	multi-organism reproductive process	416	10.90353	25	2.292836	0.03410641	0.06009615	16	64	169	0.000119445	0.03
1580	Weight-CpG	GO Biological Process	GO:0046777	protein autophosphorylation	570	14.93993	31	2.074977	0.04229195	0.05438596	18	79	139	0.000121976	0.03
1581	Weight-CpG	GO Biological Process	GO:0016322	neuron remodeling	11	0.2883144	4	13.87374	0.005457026	0.3636364	1	4	8	0.000133362	0.03
1582	Weight-CpG	GO Biological Process	GO:0009395	phospholipid catabolic process	31	0.8125223	6	7.384412	0.008185539	0.1935484	2	8	23	0.000133617	0.03
1583	Weight-CpG	GO Biological Process	GO:0030036	actin cytoskeleton organization	764	20.02474	38	1.897652	0.05184175	0.04973822	20	144	292	0.000141618	0.03
1584	Weight-CpG	GO Biological Process	GO:0006695	cholesterol biosynthetic process	60	1.572624	8	5.08704	0.01091405	0.1333333	5	10	27	0.000164733	0.04
1585	Weight-CpG	GO Biological Process	GO:0010822	positive regulation of mitochondrion organization	60	1.572624	8	5.08704	0.01091405	0.1333333	5	13	36	0.000164733	0.04
1586	Weight-CpG	GO Biological Process	GO:1902165	regulation of intrinsic apoptotic signaling pathway in response to DNA damage by p53 class mediator	21	0.5504184	5	9.083999	0.006821282	0.2380952	1	4	10	0.000175153	0.04
1587	Weight-CpG	GO Biological Process	GO:0006684	sphingomyelin metabolic process	22	0.5766288	5	8.67109	0.006821282	0.2272727	1	6	12	0.0002218	0.05
1588	Weight-CpG	GO Biological Process	GO:0072595	maintenance of protein localization in organelle	79	2.070621	9	4.346521	0.01227831	0.1139241	4	8	17	0.00022269	0.05
1589	Weight-CpG	GO Biological Process	GO:0006506	GPI anchor biosynthetic process	34	0.8911535	6	6.732846	0.008185539	0.1764706	2	11	31	0.0002283	0.05
1590	Weight-CpG	GO Biological Process	GO:0045445	myoblast differentiation	241	6.316706	17	2.691276	0.02319236	0.07053942	4	16	27	0.000229522	0.05
1591	Weight-CpG	GO Biological Process	GO:0006505	GPI anchor metabolic process	35	0.9173639	6	6.540479	0.008185539	0.1714286	2	12	34	0.000269475	0.05
1592	Weight-CpG	GO Biological Process	GO:0046548	retinal rod cell development	23	0.6028392	5	8.294086	0.006821282	0.2173913	2	6	8	0.000277327	0.05
1593	Weight-CpG	GO Biological Process	GO:0090245	axis elongation involved in somitogenesis	23	0.6028392	5	8.294086	0.006821282	0.2173913	2	3	4	0.000277327	0.05
1594	Weight-CpG	GO Cellular Component	GO:0044444	cytoplasmic part	11393	298.6151	392	1.312727	0.5347885	0.03440709	295	2334	5823	1.23E-12	1.49E-09
1595	Weight-CpG	GO Cellular Component	GO:0030529	ribonucleoprotein complex	1589	41.64832	78	1.872825	0.106412	0.04908748	41	279	688	7.69E-08	4.64E-05
1596	Weight-CpG	GO Cellular Component	GO:0035102	PRC1 complex	27	0.7076808	8	11.30453	0.01091405	0.2962963	2	5	11	3.06E-07	0.000123087
1597	Weight-CpG	GO Cellular Component	GO:0035770	ribonucleoprotein granule	400	10.48416	28	2.670696	0.03819918	0.07	14	56	91	2.93E-06	0.000758671
1598	Weight-CpG	GO Cellular Component	GO:0005737	cytoplasm	17634	462.1942	520	1.125068	0.7094134	0.02948849	440	3604	8626	3.15E-06	0.000758671
1599	Weight-CpG	GO Cellular Component	GO:0031982	vesicle	1946	51.00544	84	1.646883	0.1145975	0.04316547	51	410	932	4.62E-06	0.000925109
1600	Weight-CpG	GO Cellular Component	GO:0005829	cytosol	2884	75.59079	114	1.50812	0.1555252	0.03952843	67	504	1181	5.37E-06	0.000925109
1601	Weight-CpG	GO Cellular Component	GO:0031988	membrane-bounded vesicle	1785	46.78556	75	1.603059	0.1023192	0.04201681	47	370	843	3.81E-05	0.005746542
1602	Weight-CpG	GO Cellular Component	GO:0016023	cytoplasmic membrane-bounded vesicle	1715	44.95083	72	1.60175	0.09822647	0.04198251	46	347	787	5.63E-05	0.007109368
1603	Weight-CpG	GO Cellular Component	GO:0031410	cytoplasmic vesicle	1840	48.22713	76	1.575876	0.1036835	0.04130435	48	376	857	5.89E-05	0.007109368
1604	Weight-CpG	GO Cellular Component	GO:0005769	early endosome	403	10.56279	25	2.366799	0.03410641	0.06203474	11	84	185	7.24E-05	0.007942981
1605	Weight-CpG	GO Cellular Component	GO:0030027	lamellipodium	384	10.06479	24	2.38455	0.03274216	0.0625	9	76	123	8.94E-05	0.008895822
1606	Weight-CpG	GO Cellular Component	GO:0030141	secretory granule	246	6.447758	18	2.791668	0.02455662	0.07317073	9	75	225	9.59E-05	0.008895822
1607	Weight-CpG	GO Cellular Component	GO:0005681	spliceosomal complex	365	9.566795	23	2.404149	0.0313779	0.0630137	11	70	154	0.000110261	0.009357957
1608	Weight-CpG	GO Cellular Component	GO:0031252	cell leading edge	702	18.3997	36	1.956554	0.04911323	0.05128205	18	144	260	0.000116393	0.009357957
1609	Weight-CpG	GO Cellular Component	GO:0005789	endoplasmic reticulum membrane	1160	30.40406	52	1.710298	0.07094134	0.04482759	36	269	695	0.000131249	0.009892856
1610	Weight-CpG	GO Cellular Component	GO:0042175	nuclear outer membrane-endoplasmic reticulum membrane network	1196	31.34764	53	1.690718	0.07230559	0.04431438	37	275	710	0.000150662	0.01
1611	Weight-CpG	GO Cellular Component	GO:0001726	ruffle	326	8.54459	21	2.457695	0.02864939	0.06441718	8	60	125	0.000159779	0.01
1612	Weight-CpG	GO Cellular Component	GO:0005856	cytoskeleton	3833	100.4645	134	1.333805	0.1828104	0.03495956	82	743	1757	0.000264223	0.02
1613	Weight-CpG	GO Cellular Component	GO:0032991	macromolecular complex	10643	278.9573	324	1.161468	0.4420191	0.03044254	229	1749	4047	0.000328357	0.02
1614	Weight-CpG	GO Cellular Component	GO:0045111	intermediate filament cytoskeleton	121	3.171458	11	3.468436	0.01500682	0.09090909	4	32	214	0.000349031	0.02
1615	Weight-CpG	GO Cellular Component	GO:0031090	organelle membrane	4070	106.6763	140	1.312381	0.1909959	0.03439803	102	909	2258	0.00037864	0.02
1616	Weight-CpG	GO Cellular Component	GO:0044446	intracellular organelle part	12203	319.8455	365	1.141176	0.4979536	0.02991068	274	2298	5563	0.000392006	0.02
1617	Weight-CpG	GO Cellular Component	GO:0044455	mitochondrial membrane part	123	3.223879	11	3.412039	0.01500682	0.08943089	7	40	135	0.000401956	0.02
1618	Weight-CpG	GO Cellular Component	GO:0000932	cytoplasmic mRNA processing body	234	6.133233	16	2.608738	0.0218281	0.06837607	9	34	52	0.000488869	0.02
1619	Weight-CpG	GO Cellular Component	GO:0012505	endomembrane system	2529	66.2861	93	1.403009	0.1268759	0.03677343	66	615	1450	0.000543311	0.03
1620	Weight-CpG	GO Cellular Component	GO:0044432	endoplasmic reticulum part	1357	35.56751	56	1.574471	0.07639836	0.0412675	40	313	795	0.000576513	0.03
1621	Weight-CpG	GO Cellular Component	GO:0005742	mitochondrial outer membrane translocase complex	2	0.0524208	2	38.1528	0.002728513	1	1	1	6	0.000686072	0.03
1622	Weight-CpG	GO Cellular Component	GO:0043232	intracellular non-membrane-bounded organelle	7638	200.195	239	1.193836	0.3260573	0.03129091	155	1326	3202	0.00076954	0.03
1623	Weight-CpG	GO Cellular Component	GO:0001669	acrosomal vesicle	114	2.987985	10	3.346737	0.01364256	0.0877193	3	28	88	0.000846908	0.03
1624	Weight-CpG	GO Cellular Component	GO:0005768	endosome	1201	31.47869	50	1.588376	0.06821282	0.04163197	24	215	518	0.000931286	0.04
1625	Weight-CpG	GO Cellular Component	GO:0032580	Golgi cisterna membrane	97	2.542409	9	3.53995	0.01227831	0.09278351	4	25	66	0.001019934	0.04
1626	Weight-CpG	GO Cellular Component	GO:0030863	cortical cytoskeleton	100	2.62104	9	3.433752	0.01227831	0.09	5	26	57	0.001266874	0.05
1627	Weight-CpG	GO Cellular Component	GO:0044422	organelle part	12453	326.3981	367	1.124394	0.5006821	0.02947081	281	2356	5679	0.001296536	0.05
1628	Weight-CpG	GO Cellular Component	GO:0044445	cytosolic part	234	6.133233	15	2.445692	0.02046385	0.06410256	6	51	159	0.001388115	0.05
1629	Weight-CpG	GO Cellular Component	GO:0016514	SWI/SNF complex	65	1.703676	7	4.108763	0.009549795	0.1076923	3	9	11	0.001538534	0.05
1630	Weight-CpG	GO Cellular Component	GO:0002102	podosome	33	0.8649431	5	5.780727	0.006821282	0.1515152	1	7	17	0.001575779	0.05
1631	Weight-CpG	GO Cellular Component	GO:0016020	membrane	12338	323.3839	363	1.122505	0.4952251	0.0294213	302	2839	8474	0.001638878	0.05
1632	Weight-CpG	PANTHER Pathway	P00004	Alzheimer disease-presenilin pathway	402	10.53658	28	2.657409	0.03819918	0.06965174	10	70	113	3.22E-06	0.000486836
1633	Weight-CpG	PANTHER Pathway	P00057	Wnt signaling pathway	1099	28.80523	50	1.735796	0.06821282	0.04549591	25	167	265	0.00012399	0.009361275
1634	Weight-CpG	BioCyc Pathway	PWY3DJ-11281	sphingomyelin metabolism	18	0.4717872	5	10.598	0.006821282	0.2777778	1	4	8	7.87E-05	0.01
1635	Weight-CpG	BioCyc Pathway	PWY3DJ-1	cyclic AMP biosynthesis	159	4.167453	14	3.359366	0.01909959	0.08805031	5	34	60	8.11E-05	0.01
1636	Weight-CpG	BioCyc Pathway	PWY66-5	superpathway of cholesterol biosynthesis	25	0.65526	5	7.630559	0.006821282	0.2	3	8	26	0.000419306	0.03
1637	Weight-CpG	BioCyc Pathway	PWY-3781	aerobic respiration -- electron donor II	53	1.389151	7	5.039049	0.009549795	0.1320755	5	16	72	0.000446391	0.03
1638	Weight-CpG	BioCyc Pathway	PWY-922	mevalonate pathway I	15	0.393156	4	10.17408	0.005457026	0.2666667	2	4	12	0.000507353	0.03
1639	Weight-CpG	MSigDB Pathway	BIOCARTA_ACTINY_PATHWAY	Y branching of actin filaments	84	2.201673	13	5.904599	0.01773533	0.1547619	2	8	20	2.80E-07	0.000319733
1640	Weight-CpG	MSigDB Pathway	KEGG_ADHERENS_JUNCTION	Adherens junction	393	10.30069	29	2.815346	0.03956344	0.07379135	7	52	73	6.77E-07	0.000319733
1641	Weight-CpG	MSigDB Pathway	PID_ECADHERIN_NASCENTAJ_PATHWAY	E-cadherin signaling in the nascent adherens junction	155	4.062612	17	4.1845	0.02319236	0.1096774	6	28	39	7.27E-07	0.000319733
1642	Weight-CpG	MSigDB Pathway	REACTOME_MRNA_SPLICING	Genes involved in mRNA Splicing	260	6.814704	22	3.228314	0.03001364	0.08461538	12	60	105	1.64E-06	0.000425847
1643	Weight-CpG	MSigDB Pathway	REACTOME_PROCESSING_OF_CAPPED_INTRON_CONTAINING_PRE_MRNA	Genes involved in Processing of Capped Intron-Containing Pre-mRNA	282	7.391332	23	3.111753	0.0313779	0.08156028	13	71	134	1.79E-06	0.000425847
1644	Weight-CpG	MSigDB Pathway	BIOCARTA_CERAMIDE_PATHWAY	Ceramide Signaling Pathway	24	0.6290496	7	11.1279	0.009549795	0.2916667	3	7	22	1.94E-06	0.000425847
1645	Weight-CpG	MSigDB Pathway	KEGG_ALZHEIMERS_DISEASE	Alzheimer's disease	294	7.705857	23	2.984743	0.0313779	0.07823129	15	65	151	3.62E-06	0.000682895
1646	Weight-CpG	MSigDB Pathway	REACTOME_MRNA_PROCESSING	Genes involved in mRNA Processing	303	7.941751	23	2.896087	0.0313779	0.07590759	13	79	151	5.98E-06	0.000899857
1647	Weight-CpG	MSigDB Pathway	REACTOME_COSTIMULATION_BY_THE_CD28_FAMILY	Genes involved in Costimulation by the CD28 family	144	3.774297	15	3.97425	0.02046385	0.1041667	6	19	54	6.14E-06	0.000899857
1648	Weight-CpG	MSigDB Pathway	PID_ERBB1_DOWNSTREAM_PATHWAY	ErbB1 downstream signaling	441	11.55879	28	2.4224	0.03819918	0.06349206	8	63	103	1.80E-05	0.002377396
1649	Weight-CpG	MSigDB Pathway	KEGG_FC_GAMMA_R_MEDIATED_PHAGOCYTOSIS	Fc gamma R-mediated phagocytosis	206	5.399342	17	3.148532	0.02319236	0.08252427	6	44	92	3.35E-05	0.003949693
1650	Weight-CpG	MSigDB Pathway	REACTOME_MRNA_DECAY_BY_5_TO_3_EXORIBONUCLEASE	Genes involved in mRNA Decay by 5' to 3' Exoribonuclease	49	1.28431	8	6.229028	0.01091405	0.1632653	2	7	14	3.74E-05	0.003949693
1651	Weight-CpG	MSigDB Pathway	REACTOME_GAB1_SIGNALOSOME	Genes involved in GAB1 signalosome	130	3.407352	13	3.81528	0.01773533	0.1	6	17	36	3.89E-05	0.003949693
1652	Weight-CpG	MSigDB Pathway	PID_TRAIL_PATHWAY	TRAIL signaling pathway	26	0.6814704	6	8.804492	0.008185539	0.2307692	2	9	24	4.67E-05	0.004400788
1653	Weight-CpG	MSigDB Pathway	REACTOME_DEADENYLATION_DEPENDENT_MRNA_DECAY	Genes involved in Deadenylation-dependent mRNA decay	121	3.171458	12	3.783748	0.01637108	0.09917355	5	19	42	8.30E-05	0.007299719
1654	Weight-CpG	MSigDB Pathway	KEGG_GLYCOSYLPHOSPHATIDYLINOSITOL_GPI_ANCHOR_BIOSYNTHESIS	Glycosylphosphatidylinositol(GPI)-anchor biosynthesis	29	0.7601016	6	7.893682	0.008185539	0.2068966	2	9	25	9.01E-05	0.007430408
1655	Weight-CpG	MSigDB Pathway	REACTOME_SIGNALING_BY_SCF_KIT	Genes involved in Signaling by SCF-KIT	205	5.373132	16	2.977779	0.0218281	0.07804878	7	37	73	0.000109498	0.00849578
1656	Weight-CpG	MSigDB Pathway	KEGG_RNA_DEGRADATION	RNA degradation	208	5.451763	16	2.934831	0.0218281	0.07692308	9	27	55	0.000129676	0.008579772
1657	Weight-CpG	MSigDB Pathway	PID_CXCR4_PATHWAY	CXCR4-mediated signaling events	208	5.451763	16	2.934831	0.0218281	0.07692308	9	48	100	0.000129676	0.008579772
1658	Weight-CpG	MSigDB Pathway	KEGG_WNT_SIGNALING_PATHWAY	Wnt signaling pathway	706	18.50454	36	1.945468	0.04911323	0.0509915	17	104	142	0.000130095	0.008579772
1659	Weight-CpG	MSigDB Pathway	BIOCARTA_EDG1_PATHWAY	Phospholipids as signalling intermediaries	45	1.179468	7	5.934879	0.009549795	0.1555556	3	15	27	0.000157493	0.009399538
1660	Weight-CpG	MSigDB Pathway	KEGG_ENDOMETRIAL_CANCER	Endometrial cancer	256	6.709862	18	2.682619	0.02455662	0.0703125	9	31	50	0.000158229	0.009399538
1661	Weight-CpG	MSigDB Pathway	REACTOME_METABOLISM_OF_RNA	Genes involved in Metabolism of RNA	527	13.81288	29	2.09949	0.03956344	0.05502846	14	93	247	0.000163904	0.009399538
1662	Weight-CpG	MSigDB Pathway	REACTOME_POST_TRANSLATIONAL_MODIFICATION_SYNTHESIS_OF_GPI_ANCHORED_PROTEINS	Genes involved in Post-translational modification: synthesis of GPI-anchored proteins	33	0.8649431	6	6.936872	0.008185539	0.1818182	2	10	27	0.000192241	0.01
1663	Weight-CpG	MSigDB Pathway	REACTOME_PI3K_AKT_ACTIVATION	Genes involved in PI3K/AKT activation	133	3.485983	12	3.442358	0.01637108	0.09022556	5	18	36	0.000204738	0.01
1664	Weight-CpG	MSigDB Pathway	PID_PDGFRBPATHWAY	PDGFR-beta signaling pathway	287	7.522384	19	2.525795	0.02592087	0.06620209	7	76	127	0.000228523	0.01
1665	Weight-CpG	MSigDB Pathway	REACTOME_ADAPTIVE_IMMUNE_SYSTEM	Genes involved in Adaptive Immune System	1247	32.68437	54	1.652166	0.07366985	0.04330393	33	212	474	0.000231164	0.01
1666	Weight-CpG	MSigDB Pathway	PID_FASPATHWAY	FAS (CD95) signaling pathway	48	1.258099	7	5.56395	0.009549795	0.1458333	3	15	36	0.000238749	0.01
1667	Weight-CpG	MSigDB Pathway	PID_RAC1_PATHWAY	RAC1 signaling pathway	156	4.088822	13	3.1794	0.01773533	0.08333333	2	29	54	0.000249324	0.01
1668	Weight-CpG	MSigDB Pathway	REACTOME_PIP3_ACTIVATES_AKT_SIGNALING	Genes involved in PIP3 activates AKT signaling	120	3.145248	11	3.49734	0.01500682	0.09166667	4	12	27	0.000324848	0.01
1669	Weight-CpG	MSigDB Pathway	REACTOME_METABOLISM_OF_MRNA	Genes involved in Metabolism of mRNA	499	13.07899	27	2.06438	0.03683492	0.05410822	12	82	204	0.00035398	0.02
1670	Weight-CpG	MSigDB Pathway	KEGG_HUNTINGTONS_DISEASE	Huntington's disease	301	7.88933	19	2.408316	0.02592087	0.06312292	13	67	157	0.000414374	0.02
1671	Weight-CpG	MSigDB Pathway	REACTOME_SIGNALING_BY_EGFR_IN_CANCER	Genes involved in Signaling by EGFR in Cancer	282	7.391332	18	2.435285	0.02455662	0.06382979	10	56	103	0.000510297	0.02
1672	Weight-CpG	MSigDB Pathway	REACTOME_CD28_DEPENDENT_PI3K_AKT_SIGNALING	Genes involved in CD28 dependent PI3K/Akt signaling	107	2.804513	10	3.565682	0.01364256	0.09345794	3	7	21	0.000514672	0.02
1673	Weight-CpG	MSigDB Pathway	PID_PI3KCIAKTPATHWAY	Class I PI3K signaling events mediated by Akt	149	3.905349	12	3.072708	0.01637108	0.08053691	4	17	35	0.000580037	0.02
1674	Weight-CpG	MSigDB Pathway	KEGG_COLORECTAL_CANCER	Colorectal cancer	291	7.627226	18	2.359967	0.02455662	0.06185567	9	40	61	0.000735875	0.03
1675	Weight-CpG	MSigDB Pathway	REACTOME_CD28_CO_STIMULATION	Genes involved in CD28 co-stimulation	113	2.961775	10	3.376354	0.01364256	0.08849558	3	9	31	0.00079081	0.03
1676	Weight-CpG	MSigDB Pathway	REACTOME_GLYCOSPHINGOLIPID_METABOLISM	Genes involved in Glycosphingolipid metabolism	29	0.7601016	5	6.578068	0.006821282	0.1724138	1	10	32	0.000859531	0.03
1677	Weight-CpG	MSigDB Pathway	KEGG_OXIDATIVE_PHOSPHORYLATION	Oxidative phosphorylation	141	3.695666	11	2.976459	0.01500682	0.07801418	8	33	112	0.001257632	0.04
1678	Weight-CpG	MSigDB Pathway	PID_CXCR3PATHWAY	CXCR3-mediated signaling events	143	3.748087	11	2.934831	0.01500682	0.07692308	4	18	41	0.001409343	0.05
1679	Weight-CpG	MSigDB Pathway	REACTOME_DOWNSTREAM_SIGNAL_TRANSDUCTION	Genes involved in Downstream signal transduction	236	6.185654	15	2.424966	0.02046385	0.06355932	8	45	89	0.001509703	0.05
1680	Weight-CpG	MSigDB Pathway	KEGG_MELANOGENESIS	Melanogenesis	418	10.95595	22	2.008042	0.03001364	0.05263158	11	62	95	0.001702276	0.05
1681	Weight-CpG	MSigDB Predicted Promoter Motifs	YGACNNYACAR_UNKNOWN	Motif YGACNNYACAR (no known TF)	372	9.750268	24	2.461471	0.03274216	0.06451613	9	49	86	5.46E-05	0.02
1682	Weight-CpG	MSigDB Predicted Promoter Motifs	V$BACH1_01	Motif NNSATGAGTCATGNT matches BACH1: BTB and CNC homology 1, basic leucine zipper transcription factor 1	797	20.88969	40	1.91482	0.05457026	0.05018821	24	120	239	7.87E-05	0.02
1683	Weight-CpG	MSigDB Predicted Promoter Motifs	V$RFX1_02	Motif NNGTNRCNATRGYAACNN matches RFX1: regulatory factor X, 1 (influences HLA class II expression)	905	23.72041	43	1.812785	0.05866303	0.04751381	23	128	248	0.000145397	0.03
1684	Diet-CpG	GO Molecular Function	GO:0070300	phosphatidic acid binding	56	0.6427805	11	17.11315	0.03426791	0.1964286	2	3	5	3.61E-11	1.26E-07
1685	Diet-CpG	GO Molecular Function	GO:0032794	GTPase activating protein binding	64	0.7346063	11	14.97401	0.03426791	0.171875	2	3	8	1.66E-10	2.90E-07
1686	Diet-CpG	GO Molecular Function	GO:0080025	phosphatidylinositol-3,5-bisphosphate binding	78	0.8953014	11	12.28636	0.03426791	0.1410256	2	7	13	1.51E-09	1.75E-06
1687	Diet-CpG	GO Molecular Function	GO:0043325	phosphatidylinositol-3,4-bisphosphate binding	91	1.044518	11	10.53117	0.03426791	0.1208791	2	8	15	8.03E-09	7.01E-06
1688	Diet-CpG	GO Molecular Function	GO:0000030	mannosyltransferase activity	26	0.2984338	7	23.45579	0.02180685	0.2692308	1	4	16	1.34E-08	8.23E-06
1689	Diet-CpG	GO Molecular Function	GO:0016922	ligand-dependent nuclear receptor binding	202	2.318601	15	6.469418	0.04672897	0.07425743	3	15	18	1.42E-08	8.23E-06
1690	Diet-CpG	GO Molecular Function	GO:0005546	phosphatidylinositol-4,5-bisphosphate binding	103	1.182257	11	9.304237	0.03426791	0.1067961	2	17	28	3.00E-08	1.49E-05
1691	Diet-CpG	GO Molecular Function	GO:0031491	nucleosome binding	49	0.562433	7	12.44593	0.02180685	0.1428571	1	7	19	1.40E-06	0.000609255
1692	Diet-CpG	GO Molecular Function	GO:0003725	double-stranded RNA binding	132	1.515126	10	6.600113	0.03115265	0.07575758	4	20	54	3.13E-06	0.00121333
1693	Diet-CpG	GO Molecular Function	GO:0005547	phosphatidylinositol-3,4,5-trisphosphate binding	139	1.595473	10	6.267733	0.03115265	0.07194245	2	14	22	4.98E-06	0.001736964
1694	Diet-CpG	GO Molecular Function	GO:0019899	enzyme binding	3039	34.88232	59	1.691401	0.1838006	0.01941428	29	495	984	3.84E-05	0.01
1695	Diet-CpG	GO Molecular Function	GO:1901981	phosphatidylinositol phosphate binding	276	3.16799	12	3.787891	0.03738318	0.04347826	3	37	68	9.21E-05	0.03
1696	Diet-CpG	GO Molecular Function	GO:0017016	Ras GTPase binding	418	4.797897	15	3.126369	0.04672897	0.03588517	5	69	130	0.00011119	0.03
1697	Diet-CpG	GO Molecular Function	GO:0005515	protein binding	18211	209.0299	240	1.148161	0.7476636	0.01317885	177	2963	6457	0.000119049	0.03
1698	Diet-CpG	GO Molecular Function	GO:0031267	small GTPase binding	438	5.027462	15	2.983613	0.04672897	0.03424658	5	73	137	0.000184824	0.04
1699	Diet-CpG	GO Molecular Function	GO:0004252	serine-type endopeptidase activity	214	2.45634	10	4.071098	0.03115265	0.04672897	2	41	192	0.000197145	0.04
1700	Diet-CpG	GO Molecular Function	GO:0051020	GTPase binding	449	5.153722	15	2.910518	0.04672897	0.03340757	5	75	146	0.000241045	0.05
1701	Diet-CpG	GO Molecular Function	GO:0005085	guanyl-nucleotide exchange factor activity	609	6.990238	18	2.57502	0.05607477	0.02955665	6	98	192	0.000267823	0.05
1702	Diet-CpG	GO Molecular Function	GO:0046975	histone methyltransferase activity (H3-K36 specific)	51	0.5853894	5	8.541323	0.01557632	0.09803922	1	3	3	0.000294346	0.05
1703	Diet-CpG	GO Biological Process	GO:0072673	lamellipodium morphogenesis	54	0.6198241	10	16.13361	0.03115265	0.1851852	1	3	4	5.28E-10	3.14E-06
1704	Diet-CpG	GO Biological Process	GO:0016601	Rac protein signal transduction	57	0.6542587	10	15.28447	0.03115265	0.1754386	1	3	11	9.25E-10	3.14E-06
1705	Diet-CpG	GO Biological Process	GO:0030219	megakaryocyte differentiation	119	1.365909	13	9.517474	0.04049844	0.1092437	3	14	16	1.24E-09	3.14E-06
1706	Diet-CpG	GO Biological Process	GO:0006897	endocytosis	629	7.219803	28	3.878222	0.08722741	0.0445151	8	121	269	1.25E-09	3.14E-06
1707	Diet-CpG	GO Biological Process	GO:0009247	glycolipid biosynthetic process	66	0.7575628	10	13.20023	0.03115265	0.1515152	3	17	42	4.12E-09	8.30E-06
1708	Diet-CpG	GO Biological Process	GO:0003408	optic cup formation involved in camera-type eye development	24	0.2754774	7	25.41044	0.02180685	0.2916667	1	1	1	7.20E-09	1.21E-05
1709	Diet-CpG	GO Biological Process	GO:0097502	mannosylation	25	0.2869556	7	24.39402	0.02180685	0.28	1	3	8	9.90E-09	1.42E-05
1710	Diet-CpG	GO Biological Process	GO:0006996	organelle organization	5165	59.28502	101	1.703634	0.3146417	0.0195547	58	894	2001	1.25E-08	1.51E-05
1711	Diet-CpG	GO Biological Process	GO:0030048	actin filament-based movement	119	1.365909	12	8.785361	0.03738318	0.1008403	3	20	29	1.35E-08	1.51E-05
1712	Diet-CpG	GO Biological Process	GO:0035855	megakaryocyte development	100	1.147822	11	9.583364	0.03426791	0.11	2	11	11	2.19E-08	2.21E-05
1713	Diet-CpG	GO Biological Process	GO:0006664	glycolipid metabolic process	82	0.9412143	10	10.62457	0.03115265	0.1219512	3	26	64	3.56E-08	3.26E-05
1714	Diet-CpG	GO Biological Process	GO:0031958	corticosteroid receptor signaling pathway	32	0.3673032	7	19.05783	0.02180685	0.21875	1	3	5	6.47E-08	5.01E-05
1715	Diet-CpG	GO Biological Process	GO:0042921	glucocorticoid receptor signaling pathway	32	0.3673032	7	19.05783	0.02180685	0.21875	1	3	3	6.47E-08	5.01E-05
1716	Diet-CpG	GO Biological Process	GO:0046467	membrane lipid biosynthetic process	91	1.044518	10	9.573791	0.03115265	0.1098901	3	27	72	9.75E-08	6.81E-05
1717	Diet-CpG	GO Biological Process	GO:0006506	GPI anchor biosynthetic process	34	0.3902596	7	17.93678	0.02180685	0.2058824	1	11	31	1.01E-07	6.81E-05
1718	Diet-CpG	GO Biological Process	GO:0006505	GPI anchor metabolic process	35	0.4017378	7	17.4243	0.02180685	0.2	1	12	34	1.25E-07	7.90E-05
1719	Diet-CpG	GO Biological Process	GO:0046621	negative regulation of organ growth	126	1.446256	11	7.605845	0.03426791	0.08730159	3	8	12	2.42E-07	0.000143073
1720	Diet-CpG	GO Biological Process	GO:0030029	actin filament-based process	819	9.400665	28	2.978513	0.08722741	0.03418803	12	157	312	3.29E-07	0.000183996
1721	Diet-CpG	GO Biological Process	GO:0030031	cell projection assembly	411	4.71755	19	4.027514	0.05919003	0.04622871	8	69	166	3.47E-07	0.000183996
1722	Diet-CpG	GO Biological Process	GO:0030032	lamellipodium assembly	107	1.22817	10	8.142196	0.03115265	0.09345794	1	14	26	4.54E-07	0.000228351
1723	Diet-CpG	GO Biological Process	GO:0034728	nucleosome organization	303	3.477902	16	4.600475	0.04984424	0.05280528	4	38	154	5.21E-07	0.000249741
1724	Diet-CpG	GO Biological Process	GO:0035112	genitalia morphogenesis	167	1.916863	12	6.260227	0.03738318	0.07185629	3	11	13	5.72E-07	0.000261561
1725	Diet-CpG	GO Biological Process	GO:0030282	bone mineralization	170	1.951298	12	6.149753	0.03738318	0.07058824	3	17	30	6.91E-07	0.000302652
1726	Diet-CpG	GO Biological Process	GO:0043044	ATP-dependent chromatin remodeling	45	0.5165201	7	13.55223	0.02180685	0.1555556	1	8	17	7.68E-07	0.000321996
1727	Diet-CpG	GO Biological Process	GO:0030036	actin cytoskeleton organization	764	8.769363	26	2.964868	0.08099688	0.03403141	10	144	292	9.59E-07	0.000386087
1728	Diet-CpG	GO Biological Process	GO:0006643	membrane lipid metabolic process	146	1.675821	11	6.563948	0.03426791	0.07534247	4	50	126	1.06E-06	0.00041115
1729	Diet-CpG	GO Biological Process	GO:0006333	chromatin assembly or disassembly	338	3.87964	16	4.124094	0.04984424	0.04733728	4	44	165	2.18E-06	0.000812611
1730	Diet-CpG	GO Biological Process	GO:0035411	catenin import into nucleus	100	1.147822	9	7.840935	0.02803738	0.09	1	1	2	2.35E-06	0.000846726
1731	Diet-CpG	GO Biological Process	GO:0006325	chromatin organization	1944	22.31367	46	2.061517	0.1433022	0.02366255	24	264	532	2.47E-06	0.000849118
1732	Diet-CpG	GO Biological Process	GO:0016568	chromatin modification	1823	20.9248	44	2.102768	0.1370717	0.02413604	22	244	397	2.53E-06	0.000849118
1733	Diet-CpG	GO Biological Process	GO:0032252	secretory granule localization	103	1.182257	9	7.612558	0.02803738	0.08737864	1	2	3	3.01E-06	0.000979133
1734	Diet-CpG	GO Biological Process	GO:0019538	protein metabolic process	6932	79.56705	116	1.45789	0.3613707	0.01673399	83	1369	3258	3.51E-06	0.001103622
1735	Diet-CpG	GO Biological Process	GO:0006661	phosphatidylinositol biosynthetic process	80	0.9182579	8	8.71215	0.02492212	0.1	2	25	57	3.91E-06	0.001191962
1736	Diet-CpG	GO Biological Process	GO:0030538	embryonic genitalia morphogenesis	107	1.22817	9	7.327976	0.02803738	0.08411215	1	3	4	4.14E-06	0.001212499
1737	Diet-CpG	GO Biological Process	GO:0031214	biomineral tissue development	202	2.318601	12	5.175534	0.03738318	0.05940594	3	29	61	4.22E-06	0.001212499
1738	Diet-CpG	GO Biological Process	GO:0048619	embryonic hindgut morphogenesis	108	1.239648	9	7.260125	0.02803738	0.08333333	1	3	3	4.47E-06	0.001249842
1739	Diet-CpG	GO Biological Process	GO:0051276	chromosome organization	2182	25.04548	49	1.956441	0.152648	0.02245646	26	327	691	4.77E-06	0.001297669
1740	Diet-CpG	GO Biological Process	GO:0010822	positive regulation of mitochondrion organization	60	0.6886934	7	10.16417	0.02180685	0.1166667	4	13	36	5.64E-06	0.001493792
1741	Diet-CpG	GO Biological Process	GO:0048625	myoblast fate commitment	114	1.308517	9	6.878013	0.02803738	0.07894737	1	3	4	6.97E-06	0.001800373
1742	Diet-CpG	GO Biological Process	GO:0022904	respiratory electron transport chain	65	0.7460845	7	9.382315	0.02180685	0.1076923	3	9	36	9.68E-06	0.00243577
1743	Diet-CpG	GO Biological Process	GO:0016192	vesicle-mediated transport	1694	19.44411	40	2.057178	0.1246106	0.02361275	20	313	679	1.26E-05	0.003102997
1744	Diet-CpG	GO Biological Process	GO:0046580	negative regulation of Ras protein signal transduction	155	1.779125	10	5.620742	0.03115265	0.06451613	2	22	35	1.30E-05	0.003126776
1745	Diet-CpG	GO Biological Process	GO:0061515	myeloid cell development	228	2.617035	12	4.585342	0.03738318	0.05263158	3	21	34	1.44E-05	0.003299728
1746	Diet-CpG	GO Biological Process	GO:0006337	nucleosome disassembly	69	0.7919974	7	8.838413	0.02180685	0.1014493	1	10	14	1.44E-05	0.003299728
1747	Diet-CpG	GO Biological Process	GO:0031641	regulation of myelination	160	1.836516	10	5.445093	0.03115265	0.0625	2	9	18	1.72E-05	0.003815083
1748	Diet-CpG	GO Biological Process	GO:0022900	electron transport chain	71	0.8149539	7	8.589443	0.02180685	0.09859155	3	10	41	1.74E-05	0.003815083
1749	Diet-CpG	GO Biological Process	GO:0034502	protein localization to chromosome	15	0.1721734	4	23.2324	0.01246106	0.2666667	3	4	22	2.10E-05	0.004507911
1750	Diet-CpG	GO Biological Process	GO:0002244	hematopoietic progenitor cell differentiation	319	3.661553	14	3.823514	0.04361371	0.04388715	4	37	52	2.19E-05	0.004599262
1751	Diet-CpG	GO Biological Process	GO:0051058	negative regulation of small GTPase mediated signal transduction	166	1.905385	10	5.248283	0.03115265	0.06024096	2	23	36	2.36E-05	0.004858679
1752	Diet-CpG	GO Biological Process	GO:0045445	myoblast differentiation	241	2.766252	12	4.338	0.03738318	0.04979253	2	16	27	2.49E-05	0.00501481
1753	Diet-CpG	GO Biological Process	GO:0030520	intracellular estrogen receptor signaling pathway	77	0.8838232	7	7.920136	0.02180685	0.09090909	1	6	10	2.97E-05	0.005867546
1754	Diet-CpG	GO Biological Process	GO:0071824	protein-DNA complex subunit organization	474	5.440678	17	3.124611	0.0529595	0.03586498	5	49	173	3.95E-05	0.00764859
1755	Diet-CpG	GO Biological Process	GO:0046488	phosphatidylinositol metabolic process	142	1.629908	9	5.521785	0.02803738	0.06338028	3	46	101	4.06E-05	0.007715226
1756	Diet-CpG	GO Biological Process	GO:2000505	regulation of energy homeostasis	35	0.4017378	5	12.44593	0.01557632	0.1428571	2	4	9	4.73E-05	0.008811165
1757	Diet-CpG	GO Biological Process	GO:0048739	cardiac muscle fiber development	19	0.2180862	4	18.34137	0.01246106	0.2105263	2	3	6	5.76E-05	0.01
1758	Diet-CpG	GO Biological Process	GO:0051648	vesicle localization	445	5.107809	16	3.132458	0.04984424	0.03595506	4	47	102	6.46E-05	0.01
1759	Diet-CpG	GO Biological Process	GO:0051052	regulation of DNA metabolic process	543	6.232675	18	2.888005	0.05607477	0.03314917	11	91	205	6.49E-05	0.01
1760	Diet-CpG	GO Biological Process	GO:0022607	cellular component assembly	3594	41.25274	66	1.599894	0.2056075	0.01836394	36	532	1201	6.77E-05	0.01
1761	Diet-CpG	GO Biological Process	GO:0051054	positive regulation of DNA metabolic process	310	3.558249	13	3.653482	0.04049844	0.04193548	6	42	93	6.83E-05	0.01
1762	Diet-CpG	GO Biological Process	GO:0042692	muscle cell differentiation	1331	15.27752	32	2.094581	0.09968847	0.02404207	15	128	210	7.07E-05	0.01
1763	Diet-CpG	GO Biological Process	GO:0051234	establishment of localization	6212	71.30272	101	1.416496	0.3146417	0.01625885	69	1280	2900	7.35E-05	0.01
1764	Diet-CpG	GO Biological Process	GO:0030521	androgen receptor signaling pathway	92	1.055997	7	6.628809	0.02180685	0.07608696	1	12	19	9.35E-05	0.02
1765	Diet-CpG	GO Biological Process	GO:0030099	myeloid cell differentiation	717	8.229886	21	2.551676	0.06542056	0.0292887	9	91	165	9.52E-05	0.02
1766	Diet-CpG	GO Biological Process	GO:0006810	transport	6100	70.01716	99	1.413939	0.3084112	0.01622951	67	1251	2845	9.69E-05	0.02
1767	Diet-CpG	GO Biological Process	GO:0006497	protein lipidation	94	1.078953	7	6.487771	0.02180685	0.07446809	1	28	57	0.000107153	0.02
1768	Diet-CpG	GO Biological Process	GO:0010171	body morphogenesis	466	5.348852	16	2.991296	0.04984424	0.03433476	6	37	47	0.000110194	0.02
1769	Diet-CpG	GO Biological Process	GO:0018026	peptidyl-lysine monomethylation	66	0.7575628	6	7.920136	0.01869159	0.09090909	2	3	6	0.000111156	0.02
1770	Diet-CpG	GO Biological Process	GO:0036303	lymph vessel morphogenesis	95	1.090431	7	6.419479	0.02180685	0.07368421	3	8	12	0.000114553	0.02
1771	Diet-CpG	GO Biological Process	GO:0007442	hindgut morphogenesis	163	1.87095	9	4.810389	0.02803738	0.05521472	1	7	7	0.000117909	0.02
1772	Diet-CpG	GO Biological Process	GO:0040037	negative regulation of fibroblast growth factor receptor signaling pathway	163	1.87095	9	4.810389	0.02803738	0.05521472	1	10	12	0.000117909	0.02
1773	Diet-CpG	GO Biological Process	GO:0032844	regulation of homeostatic process	840	9.641708	23	2.38547	0.07165109	0.02738095	9	132	263	0.000121086	0.02
1774	Diet-CpG	GO Biological Process	GO:1901857	positive regulation of cellular respiration	23	0.2639991	4	15.15156	0.01246106	0.173913	1	1	1	0.000126969	0.02
1775	Diet-CpG	GO Biological Process	GO:0007265	Ras protein signal transduction	247	2.835121	11	3.879905	0.03426791	0.04453441	2	37	83	0.00014568	0.02
1776	Diet-CpG	GO Biological Process	GO:2001169	regulation of ATP biosynthetic process	24	0.2754774	4	14.52025	0.01246106	0.1666667	1	2	3	0.00015099	0.02
1777	Diet-CpG	GO Biological Process	GO:2001171	positive regulation of ATP biosynthetic process	24	0.2754774	4	14.52025	0.01246106	0.1666667	1	2	2	0.00015099	0.02
1778	Diet-CpG	GO Biological Process	GO:0060323	head morphogenesis	383	4.39616	14	3.184598	0.04361371	0.03655352	4	29	38	0.000154866	0.02
1779	Diet-CpG	GO Biological Process	GO:0010638	positive regulation of organelle organization	637	7.311628	19	2.5986	0.05919003	0.02982732	11	100	224	0.000162009	0.02
1780	Diet-CpG	GO Biological Process	GO:0043412	macromolecule modification	5661	64.97822	92	1.415859	0.2866044	0.01625155	63	999	2084	0.00018416	0.02
1781	Diet-CpG	GO Biological Process	GO:0045926	negative regulation of growth	698	8.0118	20	2.496318	0.0623053	0.0286533	9	82	177	0.000185981	0.02
1782	Diet-CpG	GO Biological Process	GO:0032846	positive regulation of homeostatic process	139	1.595473	8	5.014187	0.02492212	0.05755396	4	28	54	0.000211641	0.03
1783	Diet-CpG	GO Biological Process	GO:0042158	lipoprotein biosynthetic process	105	1.205213	7	5.8081	0.02180685	0.06666667	1	31	62	0.000214041	0.03
1784	Diet-CpG	GO Biological Process	GO:0018027	peptidyl-lysine dimethylation	48	0.5509547	5	9.075156	0.01557632	0.1041667	1	3	6	0.000220666	0.03
1785	Diet-CpG	GO Biological Process	GO:0048048	embryonic eye morphogenesis	601	6.898412	18	2.609296	0.05607477	0.02995008	7	27	33	0.000228412	0.03
1786	Diet-CpG	GO Biological Process	GO:0016071	mRNA metabolic process	1422	16.32203	32	1.96054	0.09968847	0.02250352	20	209	387	0.000234594	0.03
1787	Diet-CpG	GO Biological Process	GO:0044085	cellular component biogenesis	3830	43.9616	67	1.524057	0.2087227	0.01749347	37	579	1353	0.000247848	0.03
1788	Diet-CpG	GO Biological Process	GO:0070085	glycosylation	311	3.569728	12	3.361601	0.03738318	0.03858521	4	73	203	0.000278226	0.03
1789	Diet-CpG	GO Biological Process	GO:1901858	regulation of mitochondrial DNA metabolic process	28	0.3213903	4	12.44593	0.01246106	0.1428571	1	2	4	0.000280607	0.03
1790	Diet-CpG	GO Biological Process	GO:1901860	positive regulation of mitochondrial DNA metabolic process	28	0.3213903	4	12.44593	0.01246106	0.1428571	1	2	2	0.000280607	0.03
1791	Diet-CpG	GO Biological Process	GO:0046474	glycerophospholipid biosynthetic process	186	2.13495	9	4.215556	0.02803738	0.0483871	3	41	100	0.000316471	0.04
1792	Diet-CpG	GO Biological Process	GO:0006913	nucleocytoplasmic transport	673	7.724844	19	2.459596	0.05919003	0.0282318	10	92	165	0.00032252	0.04
1793	Diet-CpG	GO Biological Process	GO:0006464	cellular protein modification process	5372	61.66102	87	1.41094	0.271028	0.01619509	61	965	1979	0.000334866	0.04
1794	Diet-CpG	GO Biological Process	GO:0051169	nuclear transport	677	7.770757	19	2.445064	0.05919003	0.02806499	10	94	168	0.000346929	0.04
1795	Diet-CpG	GO Biological Process	GO:0006397	mRNA processing	1205	13.83126	28	2.0244	0.08722741	0.02323651	17	180	336	0.000350827	0.04
1796	Diet-CpG	GO Biological Process	GO:0016570	histone modification	1267	14.54291	29	1.994099	0.09034268	0.02288871	15	158	255	0.000351839	0.04
1797	Diet-CpG	GO Biological Process	GO:0010452	histone H3-K36 methylation	53	0.6083458	5	8.219009	0.01557632	0.09433962	1	4	4	0.00035292	0.04
1798	Diet-CpG	GO Biological Process	GO:2000507	positive regulation of energy homeostasis	30	0.3443467	4	11.6162	0.01246106	0.1333333	1	2	2	0.000368859	0.04
1799	Diet-CpG	GO Biological Process	GO:0044267	cellular protein metabolic process	6240	71.62411	98	1.368254	0.305296	0.01570513	73	1176	2608	0.000369892	0.04
1800	Diet-CpG	GO Biological Process	GO:0016569	covalent chromatin modification	1272	14.6003	29	1.986261	0.09034268	0.02279874	15	159	258	0.000374999	0.04
1801	Diet-CpG	GO Biological Process	GO:0070236	negative regulation of activation-induced cell death of T cells	3	0.03443467	2	58.081	0.00623053	0.6666667	1	2	5	0.000391035	0.04
1802	Diet-CpG	GO Biological Process	GO:0010821	regulation of mitochondrion organization	116	1.331474	7	5.257332	0.02180685	0.06034483	4	28	64	0.000393975	0.04
1803	Diet-CpG	GO Biological Process	GO:0045333	cellular respiration	117	1.342952	7	5.212397	0.02180685	0.05982906	3	28	94	0.000414992	0.04
1804	Diet-CpG	GO Biological Process	GO:0045947	negative regulation of translational initiation	84	0.9641708	6	6.222964	0.01869159	0.07142857	3	9	14	0.000418525	0.04
1805	Diet-CpG	GO Biological Process	GO:0045017	glycerolipid biosynthetic process	194	2.226775	9	4.041719	0.02803738	0.04639175	3	43	109	0.000430515	0.04
1806	Diet-CpG	GO Biological Process	GO:0048596	embryonic camera-type eye morphogenesis	580	6.65737	17	2.553561	0.0529595	0.02931034	6	23	28	0.000433587	0.04
1807	Diet-CpG	GO Biological Process	GO:0014003	oligodendrocyte development	238	2.731817	10	3.660567	0.03115265	0.04201681	2	22	32	0.000458695	0.04
1808	Diet-CpG	GO Biological Process	GO:0048557	embryonic digestive tract morphogenesis	287	3.29425	11	3.339151	0.03426791	0.03832753	2	19	20	0.000523945	0.05
1809	Diet-CpG	GO Biological Process	GO:0008380	RNA splicing	992	11.3864	24	2.107778	0.07476636	0.02419355	14	137	261	0.000529106	0.05
1810	Diet-CpG	GO Biological Process	GO:0007010	cytoskeleton organization	1560	17.90603	33	1.842955	0.1028037	0.02115385	16	286	620	0.000558537	0.05
1811	Diet-CpG	GO Biological Process	GO:0048523	negative regulation of cellular process	11481	131.7815	161	1.221719	0.5015576	0.01402317	102	1386	2712	0.000570086	0.05
1812	Diet-CpG	GO Biological Process	GO:0060070	canonical Wnt receptor signaling pathway	437	5.015984	14	2.791078	0.04361371	0.03203661	6	62	87	0.00058336	0.05
1813	Diet-CpG	GO Cellular Component	GO:0044444	cytoplasmic part	11393	130.7714	183	1.399389	0.5700935	0.01606249	127	2334	5823	2.52E-09	3.04E-06
1814	Diet-CpG	GO Cellular Component	GO:0005829	cytosol	2884	33.1032	67	2.023974	0.2087227	0.02323162	35	504	1181	1.52E-08	9.19E-06
1815	Diet-CpG	GO Cellular Component	GO:0071664	catenin-TCF7L2 complex	107	1.22817	9	7.327976	0.02803738	0.08411215	1	2	3	4.14E-06	0.00166342
1816	Diet-CpG	GO Cellular Component	GO:0001726	ruffle	326	3.741901	15	4.008658	0.04672897	0.04601227	4	60	125	6.38E-06	0.00192274
1817	Diet-CpG	GO Cellular Component	GO:0016514	SWI/SNF complex	65	0.7460845	7	9.382315	0.02180685	0.1076923	1	9	11	9.68E-06	0.002196285
1818	Diet-CpG	GO Cellular Component	GO:0030027	lamellipodium	384	4.407638	16	3.630062	0.04984424	0.04166667	7	76	123	1.09E-05	0.002196285
1819	Diet-CpG	GO Cellular Component	GO:0071564	npBAF complex	70	0.8034756	7	8.71215	0.02180685	0.1	1	8	11	1.59E-05	0.002733642
1820	Diet-CpG	GO Cellular Component	GO:0031982	vesicle	1946	22.33662	43	1.92509	0.1339564	0.02209661	25	410	932	2.87E-05	0.004322735
1821	Diet-CpG	GO Cellular Component	GO:0016605	PML body	523	6.003111	18	2.998445	0.05607477	0.03441683	5	42	80	4.02E-05	0.005381281
1822	Diet-CpG	GO Cellular Component	GO:0005768	endosome	1201	13.78535	30	2.176224	0.09345794	0.02497918	10	215	518	6.10E-05	0.007351969
1823	Diet-CpG	GO Cellular Component	GO:0031252	cell leading edge	702	8.057713	21	2.606199	0.06542056	0.02991453	10	144	260	7.08E-05	0.00776315
1824	Diet-CpG	GO Cellular Component	GO:0031988	membrane-bounded vesicle	1785	20.48863	39	1.903495	0.1214953	0.02184874	22	370	843	8.85E-05	0.008898935
1825	Diet-CpG	GO Cellular Component	GO:0044428	nuclear part	6742	77.38618	107	1.382676	0.3333333	0.01587066	69	945	1977	0.000109659	0.009844058
1826	Diet-CpG	GO Cellular Component	GO:0071565	nBAF complex	96	1.101909	7	6.352609	0.02180685	0.07291667	1	11	12	0.000122364	0.009844058
1827	Diet-CpG	GO Cellular Component	GO:0016604	nuclear body	1563	17.94046	35	1.950897	0.1090343	0.02239283	17	158	291	0.000130273	0.009844058
1828	Diet-CpG	GO Cellular Component	GO:0090544	BAF-type complex	97	1.113388	7	6.287118	0.02180685	0.07216495	1	12	15	0.000130601	0.009844058
1829	Diet-CpG	GO Cellular Component	GO:0030863	cortical cytoskeleton	100	1.147822	7	6.098505	0.02180685	0.07	5	26	57	0.00015805	0.01
1830	Diet-CpG	GO Cellular Component	GO:0031410	cytoplasmic vesicle	1840	21.11993	39	1.846597	0.1214953	0.02119565	23	376	857	0.000165977	0.01
1831	Diet-CpG	GO Cellular Component	GO:0016023	cytoplasmic membrane-bounded vesicle	1715	19.68515	37	1.879589	0.1152648	0.02157434	21	347	787	0.00017447	0.01
1832	Diet-CpG	GO Cellular Component	GO:0005689	U12-type spliceosomal complex	27	0.309912	4	12.90689	0.01246106	0.1481481	1	7	24	0.000242703	0.01
1833	Diet-CpG	GO Cellular Component	GO:0005769	early endosome	403	4.625724	14	3.026553	0.04361371	0.03473945	5	84	185	0.000260671	0.01
1834	Diet-CpG	GO Cellular Component	GO:0043231	intracellular membrane-bounded organelle	22053	253.1293	277	1.094303	0.8629283	0.01256065	241	3949	9085	0.000390099	0.02
1835	Diet-CpG	GO Cellular Component	GO:0005737	cytoplasm	17634	202.407	231	1.141265	0.7196262	0.01309969	189	3604	8626	0.000439524	0.02
1836	Diet-CpG	GO Cellular Component	GO:0010494	cytoplasmic stress granule	195	2.238254	9	4.020992	0.02803738	0.04615385	3	25	30	0.000446886	0.02
1837	Diet-CpG	GO Cellular Component	GO:0043227	membrane-bounded organelle	22086	253.508	277	1.092667	0.8629283	0.01254188	241	3963	9119	0.000466339	0.02
1838	Diet-CpG	GO Cellular Component	GO:0044448	cell cortex part	157	1.802081	8	4.439312	0.02492212	0.05095541	6	43	97	0.000480937	0.02
1839	Diet-CpG	GO Cellular Component	GO:0030141	secretory granule	246	2.823643	10	3.541524	0.03115265	0.04065041	6	75	225	0.000593074	0.03
1840	Diet-CpG	GO Cellular Component	GO:0030529	ribonucleoprotein complex	1589	18.2389	33	1.80932	0.1028037	0.02076778	19	279	688	0.000764456	0.03
1841	Diet-CpG	GO Cellular Component	GO:0035770	ribonucleoprotein granule	400	4.591289	13	2.831449	0.04049844	0.0325	6	56	91	0.000796718	0.03
1842	Diet-CpG	GO Cellular Component	GO:0070603	SWI/SNF superfamily-type complex	225	2.5826	9	3.48486	0.02803738	0.04	3	37	50	0.001234133	0.05
1843	Diet-CpG	GO Cellular Component	GO:0044451	nucleoplasm part	2963	34.00998	52	1.528963	0.1619938	0.01754978	28	344	623	0.001284634	0.05
1844	Diet-CpG	GO Cellular Component	GO:0000786	nucleosome	183	2.100515	8	3.80859	0.02492212	0.04371585	2	18	116	0.001303119	0.05
1845	Diet-CpG	GO Cellular Component	GO:0005916	fascia adherens	43	0.4935636	4	8.104325	0.01246106	0.09302326	3	9	12	0.001477561	0.05
1846	Diet-CpG	PANTHER Pathway	P00004	Alzheimer disease-presenilin pathway	402	4.614246	16	3.467522	0.04984424	0.039801	7	70	113	1.92E-05	0.002895262
1847	Diet-CpG	BioCyc Pathway	PWY3DJ-1	cyclic AMP biosynthesis	159	1.825038	12	6.575207	0.03738318	0.0754717	3	34	60	3.37E-07	0.000108843
1848	Diet-CpG	MSigDB Pathway	KEGG_ADHERENS_JUNCTION	Adherens junction	393	4.510942	25	5.54208	0.07788162	0.06361323	6	52	73	5.94E-12	7.83E-09
1849	Diet-CpG	MSigDB Pathway	REACTOME_SIGNALING_BY_SCF_KIT	Genes involved in Signaling by SCF-KIT	205	2.353036	16	6.799726	0.04984424	0.07804878	6	37	73	2.26E-09	1.49E-06
1850	Diet-CpG	MSigDB Pathway	PID_ERBB1_DOWNSTREAM_PATHWAY	ErbB1 downstream signaling	441	5.061897	22	4.346197	0.06853583	0.04988662	4	63	103	1.05E-08	4.60E-06
1851	Diet-CpG	MSigDB Pathway	KEGG_GLYCOSYLPHOSPHATIDYLINOSITOL_GPI_ANCHOR_BIOSYNTHESIS	Glycosylphosphatidylinositol(GPI)-anchor biosynthesis	29	0.3328685	7	21.02933	0.02180685	0.2413793	1	9	25	3.09E-08	7.80E-06
1852	Diet-CpG	MSigDB Pathway	REACTOME_SYNTHESIS_OF_GLYCOSYLPHOSPHATIDYLINOSITOL_GPI	Genes involved in Synthesis of glycosylphosphatidylinositol (GPI)	29	0.3328685	7	21.02933	0.02180685	0.2413793	1	7	18	3.09E-08	7.80E-06
1853	Diet-CpG	MSigDB Pathway	REACTOME_GAB1_SIGNALOSOME	Genes involved in GAB1 signalosome	130	1.492169	12	8.041984	0.03738318	0.09230769	4	17	36	3.67E-08	7.80E-06
1854	Diet-CpG	MSigDB Pathway	BIOCARTA_ACTINY_PATHWAY	Y branching of actin filaments	84	0.9641708	10	10.37161	0.03115265	0.1190476	1	8	20	4.50E-08	7.80E-06
1855	Diet-CpG	MSigDB Pathway	REACTOME_PI3K_AKT_ACTIVATION	Genes involved in PI3K/AKT activation	133	1.526604	12	7.860586	0.03738318	0.09022556	4	18	36	4.73E-08	7.80E-06
1856	Diet-CpG	MSigDB Pathway	REACTOME_POST_TRANSLATIONAL_MODIFICATION_SYNTHESIS_OF_GPI_ANCHORED_PROTEINS	Genes involved in Post-translational modification: synthesis of GPI-anchored proteins	33	0.3787814	7	18.48032	0.02180685	0.2121212	1	10	27	8.13E-08	1.19E-05
1857	Diet-CpG	MSigDB Pathway	PID_CXCR4_PATHWAY	CXCR4-mediated signaling events	208	2.38747	14	5.863947	0.04361371	0.06730769	6	48	100	1.47E-07	1.76E-05
1858	Diet-CpG	MSigDB Pathway	REACTOME_PIP3_ACTIVATES_AKT_SIGNALING	Genes involved in PIP3 activates AKT signaling	120	1.377387	11	7.986137	0.03426791	0.09166667	3	12	27	1.47E-07	1.76E-05
1859	Diet-CpG	MSigDB Pathway	PID_ECADHERIN_NASCENTAJ_PATHWAY	E-cadherin signaling in the nascent adherens junction	155	1.779125	12	6.74489	0.03738318	0.07741935	3	28	39	2.56E-07	2.81E-05
1860	Diet-CpG	MSigDB Pathway	REACTOME_CD28_DEPENDENT_PI3K_AKT_SIGNALING	Genes involved in CD28 dependent PI3K/Akt signaling	107	1.22817	10	8.142196	0.03115265	0.09345794	2	7	21	4.54E-07	4.60E-05
1861	Diet-CpG	MSigDB Pathway	REACTOME_CD28_CO_STIMULATION	Genes involved in CD28 co-stimulation	113	1.297039	10	7.709867	0.03115265	0.08849558	2	9	31	7.54E-07	7.11E-05
1862	Diet-CpG	MSigDB Pathway	REACTOME_PI3K_EVENTS_IN_ERBB4_SIGNALING	Genes involved in PI3K events in ERBB4 signaling	174	1.997211	12	6.008379	0.03738318	0.06896552	4	17	36	8.86E-07	7.63E-05
1863	Diet-CpG	MSigDB Pathway	REACTOME_COSTIMULATION_BY_THE_CD28_FAMILY	Genes involved in Costimulation by the CD28 family	144	1.652864	11	6.655114	0.03426791	0.07638889	3	19	54	9.26E-07	7.63E-05
1864	Diet-CpG	MSigDB Pathway	REACTOME_PI3K_EVENTS_IN_ERBB2_SIGNALING	Genes involved in PI3K events in ERBB2 signaling	177	2.031646	12	5.906542	0.03738318	0.06779661	4	20	42	1.06E-06	7.92E-05
1865	Diet-CpG	MSigDB Pathway	REACTOME_SIGNALING_BY_EGFR_IN_CANCER	Genes involved in Signaling by EGFR in Cancer	282	3.236859	15	4.634122	0.04672897	0.05319149	7	56	103	1.08E-06	7.92E-05
1866	Diet-CpG	MSigDB Pathway	PID_PI3KCIAKTPATHWAY	Class I PI3K signaling events mediated by Akt	149	1.710255	11	6.431788	0.03426791	0.0738255	3	17	35	1.30E-06	9.01E-05
1867	Diet-CpG	MSigDB Pathway	REACTOME_DOWNSTREAM_SIGNAL_TRANSDUCTION	Genes involved in Downstream signal transduction	236	2.708861	13	4.799065	0.04049844	0.05508475	5	45	89	3.86E-06	0.00025476
1868	Diet-CpG	MSigDB Pathway	PID_MTOR_4PATHWAY	mTOR signaling pathway	242	2.77773	13	4.68008	0.04049844	0.05371901	2	35	68	5.08E-06	0.00031897
1869	Diet-CpG	MSigDB Pathway	REACTOME_PI_3K_CASCADE	Genes involved in PI-3K cascade	208	2.38747	12	5.02624	0.03738318	0.05769231	4	30	53	5.69E-06	0.000341109
1870	Diet-CpG	MSigDB Pathway	PID_CXCR3PATHWAY	CXCR3-mediated signaling events	143	1.641386	10	6.092412	0.03115265	0.06993007	2	18	41	6.41E-06	0.00036764
1871	Diet-CpG	MSigDB Pathway	KEGG_ARRHYTHMOGENIC_RIGHT_VENTRICULAR_CARDIOMYOPATHY_ARVC	Arrhythmogenic right ventricular cardiomyopathy (ARVC)	298	3.420511	14	4.092956	0.04361371	0.04697987	4	48	74	1.03E-05	0.000564053
1872	Diet-CpG	MSigDB Pathway	REACTOME_SIGNALING_BY_PDGF	Genes involved in Signaling by PDGF	260	2.984338	13	4.356075	0.04049844	0.05	5	58	116	1.10E-05	0.000579797
1873	Diet-CpG	MSigDB Pathway	REACTOME_SIGNALING_BY_ERBB4	Genes involved in Signaling by ERBB4	387	4.442073	16	3.601922	0.04984424	0.04134367	8	37	82	1.20E-05	0.000600397
1874	Diet-CpG	MSigDB Pathway	REACTOME_NGF_SIGNALLING_VIA_TRKA_FROM_THE_PLASMA_MEMBRANE	Genes involved in NGF signalling via TRKA from the plasma membrane	478	5.486591	18	3.280726	0.05607477	0.0376569	8	76	131	1.23E-05	0.000600397
1875	Diet-CpG	MSigDB Pathway	PID_RAC1_PATHWAY	RAC1 signaling pathway	156	1.790603	10	5.584711	0.03115265	0.06410256	1	29	54	1.38E-05	0.000649961
1876	Diet-CpG	MSigDB Pathway	REACTOME_SIGNALING_BY_ERBB2	Genes involved in Signaling by ERBB2	275	3.156511	13	4.118471	0.04049844	0.04727273	5	48	95	1.99E-05	0.000904366
1877	Diet-CpG	MSigDB Pathway	KEGG_FC_GAMMA_R_MEDIATED_PHAGOCYTOSIS	Fc gamma R-mediated phagocytosis	206	2.364514	11	4.652119	0.03426791	0.05339806	2	44	92	2.86E-05	0.001257231
1878	Diet-CpG	MSigDB Pathway	PID_PDGFRBPATHWAY	PDGFR-beta signaling pathway	287	3.29425	13	3.94627	0.04049844	0.04529617	4	76	127	3.10E-05	0.001320306
1879	Diet-CpG	MSigDB Pathway	REACTOME_DOWNSTREAM_SIGNALING_OF_ACTIVATED_FGFR	Genes involved in Downstream signaling of activated FGFR	295	3.386076	13	3.839252	0.04049844	0.0440678	5	53	94	4.12E-05	0.001698179
1880	Diet-CpG	MSigDB Pathway	KEGG_ENDOMETRIAL_CANCER	Endometrial cancer	256	2.938425	12	4.08382	0.03738318	0.046875	4	31	50	4.49E-05	0.001793491
1881	Diet-CpG	MSigDB Pathway	REACTOME_SIGNALING_BY_FGFR	Genes involved in Signaling by FGFR	315	3.61564	13	3.59549	0.04049844	0.04126984	5	60	105	8.02E-05	0.003111784
1882	Diet-CpG	MSigDB Pathway	KEGG_PROSTATE_CANCER	Prostate cancer	321	3.68451	13	3.528285	0.04049844	0.04049844	5	47	85	9.69E-05	0.003651586
1883	Diet-CpG	MSigDB Pathway	KEGG_COLORECTAL_CANCER	Colorectal cancer	291	3.340163	12	3.592639	0.03738318	0.04123711	4	40	61	0.000151168	0.005538628
1884	Diet-CpG	MSigDB Pathway	KEGG_REGULATION_OF_ACTIN_CYTOSKELETON	Regulation of actin cytoskeleton	494	5.670242	16	2.821749	0.04984424	0.03238866	5	111	203	0.000213508	0.007415039
1885	Diet-CpG	MSigDB Pathway	REACTOME_SIGNALING_BY_FGFR_IN_DISEASE	Genes involved in Signaling by FGFR in disease	348	3.994422	13	3.254539	0.04049844	0.03735632	5	68	118	0.000214474	0.007415039
1886	Diet-CpG	MSigDB Pathway	KEGG_THYROID_CANCER	Thyroid cancer	177	2.031646	9	4.429907	0.02803738	0.05084746	1	16	27	0.000219247	0.007415039
1887	Diet-CpG	MSigDB Pathway	PID_AP1_PATHWAY	AP-1 transcription factor network	282	3.236859	11	3.398356	0.03426791	0.03900709	3	36	66	0.00045254	0.01
1888	Diet-CpG	MSigDB Pathway	PID_SYNDECAN_4_PATHWAY	Syndecan-4-mediated signaling events	58	0.665737	5	7.510474	0.01557632	0.0862069	4	18	32	0.000537804	0.02
1889	Diet-CpG	MSigDB Pathway	REACTOME_SIGNALLING_BY_NGF	Genes involved in Signalling by NGF	722	8.287277	19	2.292671	0.05919003	0.02631579	9	116	209	0.00075369	0.02
1890	Diet-CpG	MSigDB Pathway	REACTOME_DOWNSTREAM_TCR_SIGNALING	Genes involved in Downstream TCR signaling	40	0.4591289	4	8.71215	0.01246106	0.1	4	11	27	0.001124094	0.03
1891	Diet-CpG	MSigDB Pathway	KEGG_LEUKOCYTE_TRANSENDOTHELIAL_MIGRATION	Leukocyte transendothelial migration	223	2.559644	9	3.516114	0.02803738	0.04035874	7	55	113	0.001159899	0.03
1892	Diet-CpG	MSigDB Pathway	REACTOME_POST_TRANSLATIONAL_PROTEIN_MODIFICATION	Genes involved in Post-translational protein modification	187	2.146428	8	3.727123	0.02492212	0.04278075	2	59	172	0.001494686	0.04
1893	Diet-CpG	MSigDB Pathway	PID_HDAC_CLASSIII_PATHWAY	Signaling events mediated by HDAC Class III	74	0.8493885	5	5.886588	0.01557632	0.06756757	2	13	25	0.001628921	0.05
1894	Diet-CpG	MSigDB Pathway	REACTOME_IMMUNOREGULATORY_INTERACTIONS_BETWEEN_A_LYMPHOID_AND_A_NON_LYMPHOID_CELL	Genes involved in Immunoregulatory interactions between a Lymphoid and a non-Lymphoid cell	45	0.5165201	4	7.744133	0.01246106	0.08888889	3	11	44	0.001752139	0.05
1895	Diet-CpG	MSigDB Predicted Promoter Motifs	V$MAZ_Q6	Motif GGGGAGGG matches MAZ: MYC-associated zinc finger protein (purine-binding transcription factor)	1243	14.26743	39	2.733498	0.1214953	0.0313757	17	115	175	1.43E-08	8.79E-06
1896	Diet-CpG	MSigDB Predicted Promoter Motifs	V$PR_02	Motif NNNNNNRGNACNNKNTGTTCTNNNNNN matches PGR: progesterone receptor	843	9.676142	27	2.790368	0.08411215	0.03202847	13	80	125	1.86E-06	0.000572332
1897	Diet-CpG	MSigDB Predicted Promoter Motifs	V$E2F1_Q6	Motif TTTSGCGS matches E2F1: E2F transcription factor 1	880	10.10084	27	2.673046	0.08411215	0.03068182	19	114	216	4.12E-06	0.000817588
1898	Diet-CpG	MSigDB Predicted Promoter Motifs	V$LEF1_Q2	Motif TCAAAG matches LEF1: lymphoid enhancer-binding factor 1&lt;br&gt; TCF1: transcription factor 1, hepatic; LF-B1, hepatic nuclear factor (HNF1), albumin proximal factor	1337	15.34638	35	2.280667	0.1090343	0.02617801	15	122	201	5.32E-06	0.000817588
1899	Diet-CpG	MSigDB Predicted Promoter Motifs	V$SMAD_Q6	Motif AGACNBCNN matches SMAD1: SMAD, mothers against DPP homolog 1 (Drosophila)	1546	17.74533	38	2.141408	0.1183801	0.02457956	16	159	229	8.70E-06	0.001070527
1900	Diet-CpG	MSigDB Predicted Promoter Motifs	V$PAX5_01	Motif BCNNNRNGCANBGNTGNRTAGCSGCHNB matches PAX5: paired box gene 5 (B-cell lineage specific activator)	1150	13.19996	31	2.348492	0.09657321	0.02695652	10	95	136	1.07E-05	0.00109955
1901	Diet-CpG	MSigDB Predicted Promoter Motifs	SGCGSSAAA_V$E2F1DP2_01	Motif SGCGSSAAA matches E2F1: E2F transcription factor 1&lt;br&gt; TFDP1: transcription factor Dp-1&lt;br&gt; RB1: retinoblastoma 1 (including osteosarcoma)	504	5.785025	18	3.111482	0.05607477	0.03571429	13	78	155	2.48E-05	0.002179582
1902	Diet-CpG	MSigDB Predicted Promoter Motifs	V$ALX4_01	Motif CCTGAGAATAATC matches ALX4: aristaless-like homeobox 4	140	1.606951	9	5.600668	0.02803738	0.06428571	1	7	11	3.63E-05	0.002792915
1903	Diet-CpG	MSigDB Predicted Promoter Motifs	V$TCF4_Q5	Motif SCTTTGAW matches TCF4: transcription factor 4	1928	22.13002	42	1.897875	0.1308411	0.02178423	16	154	220	4.96E-05	0.003042574
1904	Diet-CpG	MSigDB Predicted Promoter Motifs	V$E2F1DP1_01	Motif TTTCSCGC matches E2F1: E2F transcription factor 1&lt;br&gt; TFDP1: transcription factor Dp-1	860	9.871272	24	2.431298	0.07476636	0.02790698	18	115	216	6.44E-05	0.003042574
1905	Diet-CpG	MSigDB Predicted Promoter Motifs	V$E2F1DP2_01	Motif TTTSSCGC matches E2F1: E2F transcription factor 1&lt;br&gt; TFDP2: transcription factor Dp-2 (E2F dimerization partner 2)	860	9.871272	24	2.431298	0.07476636	0.02790698	18	115	216	6.44E-05	0.003042574
1906	Diet-CpG	MSigDB Predicted Promoter Motifs	V$E2F4DP2_01	Motif TTTCSCGC matches E2F4: E2F transcription factor 4, p107/p130-binding&lt;br&gt; TFDP2: transcription factor Dp-2 (E2F dimerization partner 2)	860	9.871272	24	2.431298	0.07476636	0.02790698	18	115	216	6.44E-05	0.003042574
1907	Diet-CpG	MSigDB Predicted Promoter Motifs	V$E2F_02	Motif TTTSGCGC (no known TF)	863	9.905707	24	2.422846	0.07476636	0.02780997	18	115	216	6.80E-05	0.003042574
1908	Diet-CpG	MSigDB Predicted Promoter Motifs	V$PEA3_Q6	Motif ACWTCCK matches ETV4: ets variant gene 4 (E1A enhancer binding protein, E1AF)	920	10.55997	25	2.367432	0.07788162	0.02717391	11	108	235	6.93E-05	0.003042574
1909	Diet-CpG	MSigDB Predicted Promoter Motifs	V$E2F4DP1_01	Motif TTTSGCGC matches E2F4: E2F transcription factor 4, p107/p130-binding&lt;br&gt; TFDP1: transcription factor Dp-1	927	10.64031	25	2.349555	0.07788162	0.02696872	19	118	218	7.81E-05	0.003200537
1910	Diet-CpG	MSigDB Predicted Promoter Motifs	V$E2F1_Q6_01	Motif NTTTCGCGCS matches E2F1: E2F transcription factor 1	1047	12.0177	27	2.246686	0.08411215	0.02578797	19	123	223	8.53E-05	0.003277454
1911	Diet-CpG	MSigDB Predicted Promoter Motifs	SCGGAAGY_V$ELK1_02	Motif SCGGAAGY matches ELK1: ELK1, member of ETS oncogene family	3258	37.39605	60	1.604447	0.1869159	0.01841621	34	480	1069	0.000144557	0.005087594
1912	Diet-CpG	MSigDB Predicted Promoter Motifs	GTGACGY_V$E4F1_Q6	Motif GTGACGY matches E4F1: E4F transcription factor 1	2293	26.31957	46	1.747749	0.1433022	0.02006106	28	312	592	0.000148905	0.005087594
1913	Diet-CpG	MSigDB Predicted Promoter Motifs	V$DR3_Q4	Motif RRTGNMCYTNNTGAMCCNYNT matches VDR: vitamin D (1,25- dihydroxyvitamin D3) receptor	862	9.894229	23	2.324587	0.07165109	0.02668213	13	81	126	0.0001762	0.005703316
1914	Diet-CpG	MSigDB Predicted Promoter Motifs	V$E2F1DP1RB_01	Motif TTTSGCGC matches E2F1: E2F transcription factor 1&lt;br&gt; TFDP1: transcription factor Dp-1&lt;br&gt; RB1: retinoblastoma 1 (including osteosarcoma)	991	11.37492	25	2.197818	0.07788162	0.02522704	18	108	208	0.00021831	0.00671302
1915	Diet-CpG	MSigDB Predicted Promoter Motifs	V$ER_Q6	Motif NNARGNCANNNTGACCYNN matches ESR1: estrogen receptor 1	1749	20.07541	37	1.843051	0.1152648	0.02115495	15	155	257	0.000255772	0.00749046
1916	Diet-CpG	MSigDB Predicted Promoter Motifs	ATGGYGGA_UNKNOWN	Motif ATGGYGGA (no known TF)	667	7.655975	19	2.481722	0.05919003	0.02848576	8	70	93	0.000288717	0.008070941
1917	Diet-CpG	MSigDB Predicted Promoter Motifs	GTGGGTGK_UNKNOWN	Motif GTGGGTGK (no known TF)	1713	19.6622	36	1.830925	0.1121495	0.02101576	19	181	271	0.00035199	0.009080847
1918	Diet-CpG	MSigDB Predicted Promoter Motifs	V$CP2_01	Motif GCHCDAMCCAG matches TFCP2: transcription factor CP2	1456	16.71229	32	1.914758	0.09968847	0.02197802	9	161	246	0.000354375	0.009080847
1919	Diet-CpG	MSigDB Predicted Promoter Motifs	V$E2F_Q6	Motif TTTSGCGS (no known TF)	969	11.1224	24	2.157808	0.07476636	0.0247678	17	110	216	0.000379611	0.009338428
1920	Diet-CpG	MSigDB Predicted Promoter Motifs	CCCNNGGGAR_V$OLF1_01	Motif CCCNNGGGAR matches EBF2: early B-cell factor 2	1992	22.86462	40	1.749428	0.1246106	0.02008032	17	187	291	0.000409483	0.009685846
1921	Diet-CpG	MSigDB Predicted Promoter Motifs	V$E2F_Q6_01	Motif NKCGCGCSAAAN matches E2F&lt;br&gt; TFDP1: transcription factor Dp-1	1060	12.16692	25	2.054752	0.07788162	0.02358491	15	125	219	0.00058714	0.01
1922	Diet-CpG	MSigDB Predicted Promoter Motifs	V$GCM_Q2	Motif CNNRCCCGCATD matches GCM1: glial cells missing homolog 1 (Drosophila)	1250	14.34778	28	1.951521	0.08722741	0.0224	15	155	221	0.000621834	0.01
1923	Diet-CpG	MSigDB Predicted Promoter Motifs	V$E2F_Q4	Motif TTTSGCGS (no known TF)	1019	11.69631	24	2.051929	0.07476636	0.0235525	17	115	218	0.000768333	0.02
1924	Diet-CpG	MSigDB Predicted Promoter Motifs	V$AP1_Q2_01	Motif TGACTCANNSKN matches JUN: jun oncogene	903	10.36484	22	2.122561	0.06853583	0.02436323	12	134	247	0.00082007	0.02
1925	Diet-CpG	MSigDB Predicted Promoter Motifs	RCGCANGCGY_V$NRF1_Q6	Motif RCGCANGCGY matches NRF1: nuclear respiratory factor 1	2350	26.97383	44	1.631211	0.1370717	0.0187234	28	409	822	0.000894925	0.02
1926	Diet-CpG	MSigDB Predicted Promoter Motifs	V$BACH1_01	Motif NNSATGAGTCATGNT matches BACH1: BTB and CNC homology 1, basic leucine zipper transcription factor 1	797	9.148144	20	2.186236	0.0623053	0.0250941	11	120	239	0.000985379	0.02
1927	Diet-CpG	MSigDB Predicted Promoter Motifs	V$ER_Q6_02	Motif NAGGTCANNNY matches ESR1: estrogen receptor 1	1257	14.42813	27	1.871345	0.08411215	0.02147971	13	156	242	0.001430412	0.03
1928	Diet-CpG	MSigDB Predicted Promoter Motifs	V$E2F1_Q3	Motif NKTSSCGC matches E2F1: E2F transcription factor 1	1083	12.43092	24	1.93067	0.07476636	0.02216066	16	119	220	0.001739728	0.03
1929	Diet-CpG	MSigDB Predicted Promoter Motifs	V$CREL_01	Motif SGGRNTTTCC matches REL: v-rel reticuloendotheliosis viral oncogene homolog (avian)	1283	14.72656	27	1.833422	0.08411215	0.02104443	11	146	243	0.00191095	0.03
1930	Diet-CpG	MSigDB Predicted Promoter Motifs	V$ARP1_01	Motif TGARCCYTTGAMCCCW matches PITX2: paired-like homeodomain transcription factor 2	1039	11.92587	23	1.92858	0.07165109	0.02213667	11	92	144	0.002187747	0.04
1931	Diet-CpG	MSigDB Predicted Promoter Motifs	V$CREB_Q4	Motif NSTGACGTMANN matches CREB1: cAMP responsive element binding protein 1	1167	13.39509	25	1.866356	0.07788162	0.02142245	12	144	251	0.002208707	0.04
1932	Diet-CpG	MSigDB Predicted Promoter Motifs	V$E2F1_Q4_01	Motif TTTSGCGSG matches E2F&lt;br&gt; TFDP1: transcription factor Dp-1	1122	12.87857	24	1.863561	0.07476636	0.02139037	17	120	214	0.002743694	0.04
1933	Diet-CpG	MSigDB Predicted Promoter Motifs	V$YY1_02	Motif NNNCGGCCATCTTGNCTSNW matches YY1: YY1 transcription factor	1062	12.18987	23	1.886812	0.07165109	0.02165725	13	122	218	0.002871107	0.04
1934	Diet-CpG	MSigDB Predicted Promoter Motifs	TAANNYSGCG_UNKNOWN	Motif TAANNYSGCG (no known TF)	813	9.331796	19	2.03605	0.05919003	0.02337023	9	57	74	0.002901228	0.04
1935	Diet-CpG	MSigDB Predicted Promoter Motifs	TTCYRGAA_UNKNOWN	Motif TTCYRGAA (no known TF)	1129	12.95891	24	1.852007	0.07476636	0.02125775	10	164	299	0.002968046	0.04
1936	Diet-CpG	MSigDB Predicted Promoter Motifs	V$PAX8_01	Motif NNNTNNNGNGTGANN matches PAX8: paired box gene 8	421	4.832332	12	2.483273	0.03738318	0.02850356	3	25	32	0.003677475	0.05
1937	Diet-CpG	MSigDB Predicted Promoter Motifs	V$E2F_Q3	Motif TTTCGCGC (no known TF)	1086	12.46535	23	1.845115	0.07165109	0.02117864	16	116	208	0.003768612	0.05
1938	LS-CpG, neg	GO Cellular Component	GO:0016020	membrane	12338	54.70614	79	1.444079	0.6370968	0.006402983	74	2839	8474	8.47E-06	0.01
1939	LS-CpG, neg	GO Cellular Component	GO:0031982	vesicle	1946	8.628477	22	2.549697	0.1774194	0.01130524	16	410	932	4.30E-05	0.03
1940	LS-CpG, neg	GO Cellular Component	GO:0012505	endomembrane system	2529	11.21347	25	2.229461	0.2016129	0.00988533	21	615	1450	0.000107717	0.04
1941	LS-CpG, neg	MSigDB Pathway	BIOCARTA_P53HYPOXIA_PATHWAY	Hypoxia and p53 in the Cardiovascular system	88	0.3901881	6	15.3772	0.0483871	0.06818182	4	10	20	2.71E-06	0.003228482
1942	LS-CpG, neg	MSigDB Pathway	REACTOME_SIGNALING_BY_EGFR_IN_CANCER	Genes involved in Signaling by EGFR in Cancer	282	1.250375	9	7.197838	0.07258065	0.03191489	5	56	103	4.90E-06	0.003228482
1943	LS-CpG, neg	MSigDB Pathway	REACTOME_SIGNALING_BY_ERBB4	Genes involved in Signaling by ERBB4	387	1.715941	10	5.827707	0.08064516	0.02583979	6	37	82	9.23E-06	0.004058621
1944	LS-CpG, neg	MSigDB Pathway	REACTOME_SIGNALING_BY_PDGF	Genes involved in Signaling by PDGF	260	1.152828	8	6.939454	0.06451613	0.03076923	4	58	116	2.18E-05	0.007184112
1945	LS-CpG, neg	MSigDB Pathway	REACTOME_SIGNALING_BY_ERBB2	Genes involved in Signaling by ERBB2	275	1.219338	8	6.560938	0.06451613	0.02909091	4	48	95	3.25E-05	0.008278969
1946	LS-CpG, neg	MSigDB Pathway	PID_CXCR3PATHWAY	CXCR3-mediated signaling events	143	0.6340556	6	9.462892	0.0483871	0.04195804	2	18	41	4.38E-05	0.008278969
1947	LS-CpG, neg	MSigDB Pathway	PID_PDGFRBPATHWAY	PDGFR-beta signaling pathway	287	1.272545	8	6.286613	0.06451613	0.02787456	5	76	127	4.39E-05	0.008278969
1948	LS-CpG, neg	MSigDB Pathway	REACTOME_SIGNALING_BY_THE_B_CELL_RECEPTOR_BCR	Genes involved in Signaling by the B Cell Receptor (BCR)	488	2.16377	10	4.621563	0.08064516	0.0204918	6	58	119	6.61E-05	0.01
1949	LS-CpG, neg	MSigDB Pathway	REACTOME_DOWNSTREAM_SIGNAL_TRANSDUCTION	Genes involved in Downstream signal transduction	236	1.046414	7	6.689516	0.05645161	0.02966102	3	45	89	9.09E-05	0.01
1950	LS-CpG, neg	MSigDB Pathway	REACTOME_SIGNALLING_TO_ERKS	Genes involved in Signalling to ERKs	53	0.2349996	4	17.0213	0.03225806	0.0754717	3	17	35	9.11E-05	0.01
1951	LS-CpG, neg	MSigDB Pathway	BIOCARTA_INTEGRIN_PATHWAY	Integrin Signaling Pathway	55	0.2438676	4	16.40235	0.03225806	0.07272727	4	17	37	0.000105418	0.01
1952	LS-CpG, neg	MSigDB Pathway	REACTOME_SHC1_EVENTS_IN_EGFR_SIGNALING	Genes involved in SHC1 events in EGFR signaling	21	0.09311307	3	32.21889	0.02419355	0.1428571	2	7	14	0.000106739	0.01
1953	LS-CpG, neg	MSigDB Pathway	ST_B_CELL_ANTIGEN_RECEPTOR	B Cell Antigen Receptor	107	0.4744332	5	10.53889	0.04032258	0.04672897	4	16	38	0.000117065	0.01
1954	LS-CpG, neg	MSigDB Pathway	REACTOME_METABOLISM_OF_RNA	Genes involved in Metabolism of RNA	527	2.336695	10	4.279549	0.08064516	0.01897533	8	93	247	0.00012427	0.01
1955	LS-CpG, neg	MSigDB Pathway	REACTOME_ADAPTIVE_IMMUNE_SYSTEM	Genes involved in Adaptive Immune System	1247	5.529143	16	2.893758	0.1290323	0.01283079	11	212	474	0.000129641	0.01
1956	LS-CpG, neg	MSigDB Pathway	REACTOME_DOWNSTREAM_SIGNALING_EVENTS_OF_B_CELL_RECEPTOR_BCR	Genes involved in Downstream Signaling Events Of B Cell Receptor (BCR)	435	1.928771	9	4.666185	0.07258065	0.02068966	5	39	90	0.00014394	0.01
1957	LS-CpG, neg	MSigDB Pathway	PID_ERBB1_DOWNSTREAM_PATHWAY	ErbB1 downstream signaling	441	1.955374	9	4.602699	0.07258065	0.02040816	3	63	103	0.000159442	0.01
1958	LS-CpG, neg	MSigDB Pathway	REACTOME_SHC1_EVENTS_IN_ERBB4_SIGNALING	Genes involved in SHC1 events in ERBB4 signaling	67	0.297075	4	13.46461	0.03225806	0.05970149	3	9	19	0.000227399	0.02
1959	LS-CpG, neg	MSigDB Pathway	REACTOME_SHC_MEDIATED_SIGNALLING	Genes involved in SHC-mediated signalling	27	0.1197168	3	25.05914	0.02419355	0.1111111	2	7	14	0.000230229	0.02
1960	LS-CpG, neg	MSigDB Pathway	REACTOME_SHC_RELATED_EVENTS	Genes involved in SHC-related events	28	0.1241508	3	24.16417	0.02419355	0.1071429	2	8	15	0.000257024	0.02
1961	LS-CpG, neg	MSigDB Pathway	REACTOME_ARMS_MEDIATED_ACTIVATION	Genes involved in ARMS-mediated activation	29	0.1285847	3	23.33092	0.02419355	0.1034483	2	9	16	0.000285754	0.02
1962	LS-CpG, neg	MSigDB Pathway	REACTOME_SIGNALING_BY_CONSTITUTIVELY_ACTIVE_EGFR	Genes involved in Signaling by constitutively active EGFR	29	0.1285847	3	23.33092	0.02419355	0.1034483	2	10	16	0.000285754	0.02
1963	LS-CpG, neg	MSigDB Pathway	REACTOME_NGF_SIGNALLING_VIA_TRKA_FROM_THE_PLASMA_MEMBRANE	Genes involved in NGF signalling via TRKA from the plasma membrane	478	2.119431	9	4.246423	0.07258065	0.01882845	5	76	131	0.000289064	0.02
1964	LS-CpG, neg	MSigDB Pathway	REACTOME_GAB1_SIGNALOSOME	Genes involved in GAB1 signalosome	130	0.5764142	5	8.674318	0.04032258	0.03846154	2	17	36	0.000290678	0.02
1965	LS-CpG, neg	MSigDB Pathway	REACTOME_SIGNALING_BY_SCF_KIT	Genes involved in Signaling by SCF-KIT	205	0.9089609	6	6.600944	0.0483871	0.02926829	2	37	73	0.000314112	0.02
1966	LS-CpG, neg	MSigDB Pathway	PID_CXCR4_PATHWAY	CXCR4-mediated signaling events	208	0.9222627	6	6.505738	0.0483871	0.02884615	3	48	100	0.000339417	0.02
1967	LS-CpG, neg	MSigDB Pathway	REACTOME_DOWNSTREAM_SIGNALING_OF_ACTIVATED_FGFR	Genes involved in Downstream signaling of activated FGFR	295	1.308017	7	5.351613	0.05645161	0.02372881	3	53	94	0.00035596	0.02
1968	LS-CpG, neg	MSigDB Pathway	KEGG_REGULATION_OF_ACTIN_CYTOSKELETON	Regulation of actin cytoskeleton	494	2.190374	9	4.108887	0.07258065	0.01821862	6	111	203	0.000367394	0.02
1969	LS-CpG, neg	MSigDB Pathway	REACTOME_CELL_SURFACE_INTERACTIONS_AT_THE_VASCULAR_WALL	Genes involved in Cell surface interactions at the vascular wall	137	0.6074519	5	8.231104	0.04032258	0.03649635	4	36	79	0.000370126	0.02
1970	LS-CpG, neg	MSigDB Pathway	REACTOME_SIGNALLING_TO_RAS	Genes involved in Signalling to RAS	32	0.1418866	3	21.14365	0.02419355	0.09375	2	11	26	0.000384143	0.02
1971	LS-CpG, neg	MSigDB Pathway	PID_CD8TCRPATHWAY	TCR signaling in na&amp;#xef;ve CD8+ T cells	77	0.3414146	4	11.71596	0.03225806	0.05194805	3	23	50	0.000388022	0.02
1972	LS-CpG, neg	MSigDB Pathway	REACTOME_METABOLISM_OF_MRNA	Genes involved in Metabolism of mRNA	499	2.212544	9	4.067716	0.07258065	0.01803607	7	82	204	0.000395192	0.02
1973	LS-CpG, neg	MSigDB Pathway	REACTOME_IMMUNE_SYSTEM	Genes involved in Immune System	1817	8.056497	19	2.358345	0.1532258	0.0104568	14	337	792	0.00040963	0.02
1974	LS-CpG, neg	MSigDB Pathway	REACTOME_PROLONGED_ERK_ACTIVATION_EVENTS	Genes involved in Prolonged ERK activation events	34	0.1507545	3	19.89991	0.02419355	0.08823529	2	11	18	0.000460463	0.02
1975	LS-CpG, neg	MSigDB Pathway	REACTOME_COSTIMULATION_BY_THE_CD28_FAMILY	Genes involved in Costimulation by the CD28 family	144	0.6384896	5	7.830981	0.04032258	0.03472222	2	19	54	0.000464992	0.02
1976	LS-CpG, neg	MSigDB Pathway	REACTOME_SIGNALING_BY_FGFR	Genes involved in Signaling by FGFR	315	1.396696	7	5.011828	0.05645161	0.02222222	3	60	105	0.000526345	0.02
1977	LS-CpG, neg	MSigDB Pathway	PID_TCR_PATHWAY	TCR signaling in na&amp;#xef;ve CD4+ T cells	88	0.3901881	4	10.25147	0.03225806	0.04545455	3	26	63	0.000644023	0.02
1978	LS-CpG, neg	MSigDB Pathway	PID_ECADHERIN_NASCENTAJ_PATHWAY	E-cadherin signaling in the nascent adherens junction	155	0.6872631	5	7.275234	0.04032258	0.03225806	3	28	39	0.000649669	0.02
1979	LS-CpG, neg	MSigDB Pathway	PID_MTOR_4PATHWAY	mTOR signaling pathway	242	1.073017	6	5.591709	0.0483871	0.02479339	2	35	68	0.000753028	0.03
1980	LS-CpG, neg	MSigDB Pathway	PID_ERBB1_INTERNALIZATION_PATHWAY	Internalization of ErbB1	93	0.4123579	4	9.700312	0.03225806	0.04301075	3	24	39	0.000792766	0.03
1981	LS-CpG, neg	MSigDB Pathway	KEGG_NATURAL_KILLER_CELL_MEDIATED_CYTOTOXICITY	Natural killer cell mediated cytotoxicity	164	0.7271687	5	6.875983	0.04032258	0.0304878	3	43	101	0.000837722	0.03
1982	LS-CpG, neg	MSigDB Pathway	PID_GMCSF_PATHWAY	GMCSF-mediated signaling events	42	0.1862261	3	16.10945	0.02419355	0.07142857	2	14	35	0.000860848	0.03
1983	LS-CpG, neg	MSigDB Pathway	ST_T_CELL_SIGNAL_TRANSDUCTION	T Cell Signal Transduction	97	0.4300937	4	9.300299	0.03225806	0.04123711	3	17	45	0.000928058	0.03
1984	LS-CpG, neg	MSigDB Pathway	REACTOME_SIGNALING_BY_FGFR_IN_DISEASE	Genes involved in Signaling by FGFR in disease	348	1.543017	7	4.536568	0.05645161	0.02011494	3	68	118	0.000943947	0.03
1985	LS-CpG, neg	MSigDB Pathway	REACTOME_P38MAPK_EVENTS	Genes involved in p38MAPK events	11	0.04877351	2	41.00587	0.01612903	0.1818182	1	5	12	0.0010449	0.03
1986	LS-CpG, neg	MSigDB Pathway	REACTOME_RAF_MAP_KINASE_CASCADE	Genes involved in RAF/MAP kinase cascade	11	0.04877351	2	41.00587	0.01612903	0.1818182	1	4	9	0.0010449	0.03
1987	LS-CpG, neg	MSigDB Pathway	REACTOME_IL_2_SIGNALING	Genes involved in Interleukin-2 signaling	45	0.199528	3	15.03548	0.02419355	0.06666667	2	18	40	0.001053815	0.03
1988	LS-CpG, neg	MSigDB Pathway	REACTOME_PI3K_EVENTS_IN_ERBB4_SIGNALING	Genes involved in PI3K events in ERBB4 signaling	174	0.7715083	5	6.480812	0.04032258	0.02873563	2	17	36	0.001091301	0.03
1989	LS-CpG, neg	MSigDB Pathway	REACTOME_PI3K_EVENTS_IN_ERBB2_SIGNALING	Genes involved in PI3K events in ERBB2 signaling	177	0.7848101	5	6.370968	0.04032258	0.02824859	2	20	42	0.001177411	0.03
1990	LS-CpG, neg	MSigDB Pathway	BIOCARTA_P35ALZHEIMERS_PATHWAY	Deregulation of CDK5 in Alzheimers Disease	47	0.2083959	3	14.39568	0.02419355	0.06382979	3	9	11	0.001196461	0.03
1991	LS-CpG, neg	MSigDB Pathway	REACTOME_CD28_DEPENDENT_PI3K_AKT_SIGNALING	Genes involved in CD28 dependent PI3K/Akt signaling	107	0.4744332	4	8.431112	0.03225806	0.03738318	1	7	21	0.001336079	0.03
1992	LS-CpG, neg	MSigDB Pathway	KEGG_CHEMOKINE_SIGNALING_PATHWAY	Chemokine signaling pathway	275	1.219338	6	4.920704	0.0483871	0.02181818	5	61	171	0.001451926	0.04
1993	LS-CpG, neg	MSigDB Pathway	REACTOME_CD28_CO_STIMULATION	Genes involved in CD28 co-stimulation	113	0.501037	4	7.983443	0.03225806	0.03539823	1	9	31	0.00163337	0.04
1994	LS-CpG, neg	MSigDB Pathway	PID_ERBB1_RECEPTOR_PROXIMAL_PATHWAY	EGF receptor (ErbB1) signaling pathway	53	0.2349996	3	12.76598	0.02419355	0.05660377	2	19	34	0.001695451	0.04
1995	LS-CpG, neg	MSigDB Pathway	REACTOME_SIGNALING_BY_ILS	Genes involved in Signaling by Interleukins	291	1.290281	6	4.65015	0.0483871	0.02061856	5	48	102	0.001931155	0.05
1996	LS-CpG, neg	MSigDB Pathway	BIOCARTA_EIF2_PATHWAY	Regulation of eIF2	15	0.06650933	2	30.07097	0.01612903	0.1333333	1	3	10	0.001971785	0.05
1997	LS-CpG, neg	MSigDB Pathway	REACTOME_CYTOKINE_SIGNALING_IN_IMMUNE_SYSTEM	Genes involved in Cytokine Signaling in Immune system	510	2.261317	8	3.537761	0.06451613	0.01568627	7	96	230	0.002015079	0.05
[truncated: 112 more rows]
