# Supplementary material for: Genetic loci and metabolic states associated with murine epigenetic aging
Source: eLife. 2022 Apr 7;11:e75244. doi: 10.7554/eLife.75244 (PMC9049972; doi:10.7554/eLife.75244)
Supplement: Supplementary file 9. [file elife-75244-supp9.xlsx]

## Sheet: Sheet1
Supplementary file 9: Enrichment/depletion in genomic regions and chromatin states for the differentially methylated CpGs
ChromHMM chromatin states were for neonatal (P0) liver; generated by Gorkin et al. (2020)
For enrichment, R code used was: phyper(q-1, m, n, k, lower.tail=FALSE)
For depletion, R code used was: phyper(q, m, n, k)
Array as background
	Full set					Age-DMCs								BW-DMCs				Diet-DMCs				LS-DMCs
																		321				236
	Genomic annotation	Type	ChromHMM description	Counts in array background	% of array background	Age-gains (counts)	Age-gains (Fold enricment/depletion)	Age-gain (enrichmentP)	Age-gain (depletionP)	Age-loss (counts)	Age-loss (Fold enricment/depletion)	Age-loss (enrichmentP)	Age-loss (depletionP)	BW-CpG (counts)	BW-CpG (Fold enricment/depletion)	BW-CpG (enrichmentP)	BW-CpG (depletionP)	Diet-CpG (counts)	Diet-CpG (Fold enricment/depletion)	Diet-CpG (enrichmentP)	Diet-CpG (depletionP)	LS-CpG (counts)	LS-CpG (Fold enricment/depletion)	LS-CpG (enrichmentP)	LS-CpG (depletionP)
1	En-Pd	Liver_P0_ChromHMM	Enhancer, Poised TSS-distal	138	0.0049	41	1.65184	0.00051496	0.999748	13	1.7298	0.0382918	0.981529	12	3.31763	0.000288687	0.999927	8	5.05052	0.000201437	0.999968	1	-1.16456	0.690372	0.675081
2	En-Pp	Liver_P0_ChromHMM	Enhancer, Poised TSS-proximal	197	0.007	59	1.66513	2.76717e-05	0.999986	21	1.95742	0.00258524	0.998859	7	1.35568	0.259927	0.852467	2	-1.13061	0.662864	0.605714	3	1.80457	0.232197	0.913861
3	En-Sd	Liver_P0_ChromHMM	Enhancer, Strong TSS-distal	56	0.002	12	1.19139	0.299877	0.804242	9	2.95111	0.00307381	0.999201	11	7.4943	1.89445e-07	1	6	9.33445	4.37267e-05	0.999996	0	0	0.0811826	0.98816
4	En-Sp	Liver_P0_ChromHMM	Enhancer, Strong TSS-proximal	132	0.0047	29	1.22148	0.140494	0.902121	12	1.66931	0.0565937	0.971946	4	1.15615	0.45621	0.734641	2	1.32002	0.448613	0.80605	2	1.79545	0.306332	0.898795
5	En-W	Liver_P0_ChromHMM	Enhancer, Weak TSS-distal	93	0.0033	16	-1.04544	0.620047	0.487033	10	1.97446	0.0298891	0.987781	6	2.46147	0.0355999	0.988794	2	1.87358	0.289219	0.908246	2	2.54839	1	0.454097
6	Hc-H	Liver_P0_ChromHMM	Heterochromatin, H3K9me3-associated	33	0.0012	1	-5.93542	0.998566	0.0118247	2	1.11288	0.543101	0.733047	1	1.15615	0.583966	0.785999	0	0	1	0.683047	0	0	1	0.755917
7	Hc-P	Liver_P0_ChromHMM	Heterochromatin, Polycomb-associated	2948	0.1054	1405	2.64979	0	1	35	-4.587	1	5.81149e-37	20	-3.86341	1	4.03801e-16	3	-11.2793	1	2.38806e-12	39	1.56767	0.00310977	0.998265
8	NRS	Liver_P0_ChromHMM	No Reproducible State (ony relevant to "replicated" call set)	5774	0.2065	1161	1.11794	1.70552e-06	0.999999	398	1.26572	7.0012e-08	1	186	1.22903	0.00100143	0.999258	90	1.35797	0.000918828	0.999411	47	0.964583	0.63522	0.427449
9	NS	Liver_P0_ChromHMM	No Chromatin Signal	6840	0.2446	367	-3.35218	1	4.91143e-261	451	1.21074	1.36296e-06	0.999999	88	-2.03726	1	9.61241e-18	24	-3.27129	1	1.31881e-15	32	-1.8038	0.999989	2.40828e-05
10	Pr-A	Liver_P0_ChromHMM	Promoter, Active	1572	0.0562	158	-1.78951	1	1.5125e-19	24	-3.56706	1	2.49396e-16	11	-3.7457	1	9.46869e-09	3	-6.01459	0.999998	1.08015e-05	7	-1.89512	0.980866	0.0420052
11	Pr-B	Liver_P0_ChromHMM	Promoter, Bivalent	1695	0.0606	945	3.09973	1.81374e-289	1	10	-9.2308	1	1.20259e-29	9	-4.93629	1	3.18513e-11	1	-19.4556	1	3.7457e-08	9	-1.58931	0.952375	0.0879597
12	Pr-F	Liver_P0_ChromHMM	Promoter, Flanking	108	0.0039	28	1.44144	0.0250425	0.985666	10	1.70023	0.0699896	0.966668	10	3.53267	0.000554121	0.999872	2	1.61336	0.352307	0.872092	2	2.19444	0.231479	0.936379
13	Pr-W	Liver_P0_ChromHMM	Promoter, Weak/Inactive	273	0.0098	71	1.44597	0.000588073	0.999649	7	-2.1239	0.993122	0.016699	2	-3.57772	0.994235	0.0245228	0	0	1	0.0421216	1	-2.3038	0.902211	0.327242
14	Tr-I	Liver_P0_ChromHMM	Transcription, Initiation	137	0.0049	33	1.33923	0.0435255	0.972451	19	2.54662	0.000164153	0.999946	9	2.50639	0.0102275	0.996653	5	3.17962	0.0211525	0.994887	3	2.59489	0.109943	0.970908
15	Tr-P	Liver_P0_ChromHMM	Transcription, Permissive	3903	0.1396	419	-1.67541	1	3.51843e-41	285	1.34084	6.95357e-08	1	143	1.39786	1.6241e-05	0.99999	84	1.87502	4.81936e-09	1	33	1.00192	0.523957	0.551041
16	Tr-S	Liver_P0_ChromHMM	Transcription, Strong	4067	0.1454	285	-2.56665	1	8.36631e-104	217	-1.02067	0.642738	0.385661	214	2.00755	4.15896e-25	1	89	1.90652	5.89405e-10	1	55	1.60253	0.000215729	0.999885
17	Intergenic_upstream	Gene feature		2302	0.0823	272	-1.52221	1	2.18226e-17	155	1.23639	0.00326081	0.997527	36	-1.67601	0.999031	0.00164468	4	-6.60572	1	1.66319e-07	16	-1.21414	0.955128	0.0733156
19	fiveUTR	Gene feature		2333	0.0834	686	1.63483	1.70546e-45	1	65	-1.95466	1	8.99856e-11	43	-1.42207	0.98202	0.0258485	14	-1.91276	0.994923	0.0101248	16	-1.23049	0.960358	0.0655044
18	Promoter	Gene feature		1487	0.0532	533	1.99287	4.96272e-64	1	47	-1.72299	0.999993	1.265e-05	19	-2.05131	0.999779	0.00047454	5	-3.41362	0.999773	0.000837182	15	1.19536	0.572346	0.533649
20	Exon	Gene feature		9453	0.338	1540	-1.10404	1	6.11788e-08	467	-1.10236	0.996623	0.00399957	284	1.14624	1.11725e-15	1	113	1.04144	5.90241e-05	0.999964	88	1.10314	0.0166154	0.988284
21	Intron	Gene feature		7348	0.2627	1343	1.01618	0.229826	0.780741	504	1.25948	7.25746e-10	1	216	1.12153	2.89991e-08	1	135	1.60063	8.00991e-18	1	64	1.03212	0.312233	0.738076
22	threeUTR	Gene feature		2446	0.0875	254	-1.73205	1	9.38848e-28	138	1.03598	0.340897	0.692287	101	1.5754	1.17697e-07	1	44	1.56719	0.000429084	0.999775	27	1.30805	0.302171	0.766328
23	Intergenic_downstream	Gene feature		2597	0.0929	402	-1.16194	0.999826	0.000215404	147	1.03938	0.319559	0.711826	34	-2.00201	0.99999	2.10107e-05	6	-4.96816	1	3.64193e-07	10	-2.19156	0.999923	0.000224384
