# Supplementary material for: Genetic loci and metabolic states associated with murine epigenetic aging
Source: eLife. 2022 Apr 7;11:e75244. doi: 10.7554/eLife.75244 (PMC9049972; doi:10.7554/eLife.75244)
Supplement: Supplementary file 10. [file elife-75244-supp10.xlsx]

## Sheet: Sheet1
Supplementary file 10. QTL analysis of epigenetic age acceleration and methylome-wide entropy
				GEMMA QTL analysis for the EAA traits with diet, BW1, and BWF as co-factors														GEMMA QTL analysis for DNAm entropy with age, diet, BW1, and BWF as co-factors
																		Methylome-wide entropy, 20 bins
Index	GeneticMarker	Chr	Mb	EAA, pan (-Log10p)	EAA, pan (genotype effect)	EAA, liver (-Log10p)	EAA, liver (genotype effect)	dev.EAA, pan (-Log10p)	dev.EAA, pan (genotype effect)	dev.EAA, liver (-Log10p)	dev.EAA, liver (genotype effect)	int.EAA, pan (-Log10p)	int.EAA, pan (genotype effect)	int.EAA, liver (-Log10p)	int.EAA, liver (genotype effect)	FishersCombinedP (df = 12)	EAA.Log10FishersCombinedP (df = 12)	Entropy (-Log10p)	Entropy (genotype effect)
1	rs31443144	1	3.01027	1.34678	-0.0974409	0.24298	-0.018924	0.242671	-0.0303386	0.153766	0.0150758	1.77133	-0.120552	0.293306	-0.0335488	0.097207	1.0123	0.334696	0.00272941
2	rs6269442	1	3.4922	1.34678	-0.0974409	0.24298	-0.018924	0.242671	-0.0303386	0.153766	0.0150758	1.77133	-0.120552	0.293306	-0.0335488	0.097207	1.0123	0.334696	0.00272941
3	rs32285189	1	3.5112	1.34678	-0.0974409	0.24298	-0.018924	0.242671	-0.0303386	0.153766	0.0150758	1.77133	-0.120552	0.293306	-0.0335488	0.097207	1.0123	0.334696	0.00272941
4	rs258367496	1	3.6598	1.34678	-0.0974409	0.24298	-0.018924	0.242671	-0.0303386	0.153766	0.0150758	1.77133	-0.120552	0.293306	-0.0335488	0.097207	1.0123	0.334696	0.00272941
5	rs32430919	1	3.77702	1.34678	-0.0974409	0.24298	-0.018924	0.242671	-0.0303386	0.153766	0.0150758	1.77133	-0.120552	0.293306	-0.0335488	0.097207	1.0123	0.334696	0.00272941
6	rs36251697	1	3.81227	1.34678	-0.0974409	0.24298	-0.018924	0.242671	-0.0303386	0.153766	0.0150758	1.77133	-0.120552	0.293306	-0.0335488	0.097207	1.0123	0.334696	0.00272941
7	rs30658298	1	4.43062	1.34678	-0.0974409	0.24298	-0.018924	0.242671	-0.0303386	0.153766	0.0150758	1.77133	-0.120552	0.293306	-0.0335488	0.097207	1.0123	0.334696	0.00272941
8	rs51852623	1	4.44674	1.34678	-0.0974409	0.24298	-0.018924	0.242671	-0.0303386	0.153766	0.0150758	1.77133	-0.120552	0.293306	-0.0335488	0.097207	1.0123	0.334696	0.00272941
9	rs31879829	1	4.51871	1.34678	-0.0974409	0.24298	-0.018924	0.242671	-0.0303386	0.153766	0.0150758	1.77133	-0.120552	0.293306	-0.0335488	0.097207	1.0123	0.334696	0.00272941
10	rs36742481	1	4.77632	1.34678	-0.0974409	0.24298	-0.018924	0.242671	-0.0303386	0.153766	0.0150758	1.77133	-0.120552	0.293306	-0.0335488	0.097207	1.0123	0.334696	0.00272941
11	rs6365999	1	4.82098	1.34678	-0.0974409	0.24298	-0.018924	0.242671	-0.0303386	0.153766	0.0150758	1.77133	-0.120552	0.293306	-0.0335488	0.097207	1.0123	0.334696	0.00272941
12	rs13470446	1	4.84656	1.34678	-0.0974409	0.24298	-0.018924	0.242671	-0.0303386	0.153766	0.0150758	1.77133	-0.120552	0.293306	-0.0335488	0.097207	1.0123	0.334696	0.00272941
13	Affy_10344635	1	4.87804	0.546664	-0.0557289	0.0242352	-0.00237734	0.0755598	-0.0113332	0.291499	0.0269134	1.10309	-0.094089	0.173406	-0.0224426	0.598601	0.222862	0.255365	0.00225762
14	rs6376963	1	5.01801	0.546664	-0.0557289	0.0242352	-0.00237734	0.0755598	-0.0113332	0.291499	0.0269134	1.10309	-0.094089	0.173406	-0.0224426	0.598601	0.222862	0.255365	0.00225762
15	rs30847416	1	5.0252	0.282289	-0.0334863	0.507551	0.035217	0.0765091	0.0114384	0.509026	0.0414067	0.664179	-0.0664895	0.0802306	0.0111596	0.636833	0.195974	0.567898	0.00423503
16	rs32759286	1	5.0288	0.282289	-0.0334863	0.507551	0.035217	0.0765091	0.0114384	0.509026	0.0414067	0.664179	-0.0664895	0.0802306	0.0111596	0.636833	0.195974	0.567898	0.00423503
17	rs31625087	1	5.11967	0.282289	-0.0334863	0.507551	0.035217	0.0765091	0.0114384	0.509026	0.0414067	0.664179	-0.0664895	0.0802306	0.0111596	0.636833	0.195974	0.567898	0.00423503
18	rs31716357	1	5.15582	0.282289	-0.0334863	0.507551	0.035217	0.0765091	0.0114384	0.509026	0.0414067	0.664179	-0.0664895	0.0802306	0.0111596	0.636833	0.195974	0.567898	0.00423503
19	rs3677817	1	5.18598	0.282289	-0.0334863	0.507551	0.035217	0.0765091	0.0114384	0.509026	0.0414067	0.664179	-0.0664895	0.0802306	0.0111596	0.636833	0.195974	0.567898	0.00423503
20	rs47937185	1	5.31678	0.282289	-0.0334863	0.507551	0.035217	0.0765091	0.0114384	0.509026	0.0414067	0.664179	-0.0664895	0.0802306	0.0111596	0.636833	0.195974	0.567898	0.00423503
21	rs32140280	1	5.64153	0.215606	-0.0263588	0.993517	0.0555007	0.163298	0.0222956	0.906499	0.0614022	0.422248	-0.0470736	0.27139	0.0318513	0.320998	0.493497	0.518895	0.00392167
22	rs32096391	1	6.09778	0.215606	-0.0263588	0.993517	0.0555007	0.163298	0.0222956	0.906499	0.0614022	0.422248	-0.0470736	0.27139	0.0318513	0.320998	0.493497	0.518895	0.00392167
23	rs47493511	1	6.35748	0.215606	-0.0263588	0.993517	0.0555007	0.163298	0.0222956	0.906499	0.0614022	0.422248	-0.0470736	0.27139	0.0318513	0.320998	0.493497	0.518895	0.00392167
24	rs31190522	1	6.74744	0.215606	-0.0263588	0.993517	0.0555007	0.163298	0.0222956	0.906499	0.0614022	0.422248	-0.0470736	0.27139	0.0318513	0.320998	0.493497	0.518895	0.00392167
25	rs6298633	1	6.83016	0.215606	-0.0263588	0.993517	0.0555007	0.163298	0.0222956	0.906499	0.0614022	0.422248	-0.0470736	0.27139	0.0318513	0.320998	0.493497	0.518895	0.00392167
26	rs31362910	1	9.84399	0.215606	-0.0263588	0.993517	0.0555007	0.163298	0.0222956	0.906499	0.0614022	0.422248	-0.0470736	0.27139	0.0318513	0.320998	0.493497	0.518895	0.00392167
27	rs31878990	1	10.0983	0.215606	-0.0263588	0.993517	0.0555007	0.163298	0.0222956	0.906499	0.0614022	0.422248	-0.0470736	0.27139	0.0318513	0.320998	0.493497	0.518895	0.00392167
28	rs32186775	1	10.163	0.215606	-0.0263588	0.993517	0.0555007	0.163298	0.0222956	0.906499	0.0614022	0.422248	-0.0470736	0.27139	0.0318513	0.320998	0.493497	0.518895	0.00392167
29	rs31868650	1	10.8091	0.215606	-0.0263588	0.993517	0.0555007	0.163298	0.0222956	0.906499	0.0614022	0.422248	-0.0470736	0.27139	0.0318513	0.320998	0.493497	0.518895	0.00392167
30	rs6360236	1	11.0838	0.215606	-0.0263588	0.993517	0.0555007	0.163298	0.0222956	0.906499	0.0614022	0.422248	-0.0470736	0.27139	0.0318513	0.320998	0.493497	0.518895	0.00392167
31	rs32740138	1	11.4161	0.215606	-0.0263588	0.993517	0.0555007	0.163298	0.0222956	0.906499	0.0614022	0.422248	-0.0470736	0.27139	0.0318513	0.320998	0.493497	0.518895	0.00392167
32	rs249962268_D1Mit1	1	11.5155	0.119704	-0.0155799	0.551307	0.0361361	0.00471242	0.000736164	0.491113	0.0389936	0.545383	-0.056569	0.282707	0.0325157	0.686883	0.163117	0.668349	0.00468819
33	rs30991578	1	11.7933	0.119704	-0.0155799	0.551307	0.0361361	0.00471242	0.000736164	0.491113	0.0389936	0.545383	-0.056569	0.282707	0.0325157	0.686883	0.163117	0.668349	0.00468819
34	rs32347261	1	12.741	0.119704	-0.0155799	0.551307	0.0361361	0.00471242	0.000736164	0.491113	0.0389936	0.545383	-0.056569	0.282707	0.0325157	0.686883	0.163117	0.668349	0.00468819
35	rs36585555	1	12.9384	0.262029	-0.029256	1.04647	0.052704	0.154525	0.0200579	0.775697	0.0515007	0.131443	-0.0168762	0.715119	0.061682	0.287608	0.541198	1.06955	0.00614694
36	rs30477285	1	12.9948	0.0311311	-0.00438676	1.10237	0.056637	0.416903	0.0470741	0.796784	0.0544151	0.0598448	-0.00845288	0.71219	0.0637694	0.278038	0.555896	0.950635	0.0057745
37	rs32223513	1	13.0557	0.0311311	-0.00438676	1.10237	0.056637	0.416903	0.0470741	0.796784	0.0544151	0.0598448	-0.00845288	0.71219	0.0637694	0.278038	0.555896	0.950635	0.0057745
38	rs45688852	1	13.0733	0.0311311	-0.00438676	1.10237	0.056637	0.416903	0.0470741	0.796784	0.0544151	0.0598448	-0.00845288	0.71219	0.0637694	0.278038	0.555896	0.950635	0.0057745
39	rs48988706	1	13.8426	0.0311311	-0.00438676	1.10237	0.056637	0.416903	0.0470741	0.796784	0.0544151	0.0598448	-0.00845288	0.71219	0.0637694	0.278038	0.555896	0.950635	0.0057745
40	rs31710291	1	13.8554	0.0311311	-0.00438676	1.10237	0.056637	0.416903	0.0470741	0.796784	0.0544151	0.0598448	-0.00845288	0.71219	0.0637694	0.278038	0.555896	0.950635	0.0057745
41	rs31794283	1	13.8604	0.0311311	-0.00438676	1.10237	0.056637	0.416903	0.0470741	0.796784	0.0544151	0.0598448	-0.00845288	0.71219	0.0637694	0.278038	0.555896	0.950635	0.0057745
42	rs6296049	1	13.8906	0.0311311	-0.00438676	1.10237	0.056637	0.416903	0.0470741	0.796784	0.0544151	0.0598448	-0.00845288	0.71219	0.0637694	0.278038	0.555896	0.950635	0.0057745
43	rs32381514	1	14.568	0.0311311	-0.00438676	1.10237	0.056637	0.416903	0.0470741	0.796784	0.0544151	0.0598448	-0.00845288	0.71219	0.0637694	0.278038	0.555896	0.950635	0.0057745
44	rs31577697	1	14.5769	0.0151736	-0.00220092	0.958721	0.0520372	0.341551	0.0407598	0.758253	0.0531297	0.078791	-0.0110307	1.06489	0.0844797	0.25162	0.599255	0.955965	0.00583662
45	rs30996958	1	14.7481	0.0151736	-0.00220092	0.958721	0.0520372	0.341551	0.0407598	0.758253	0.0531297	0.078791	-0.0110307	1.06489	0.0844797	0.25162	0.599255	0.955965	0.00583662
46	rs31574495	1	14.7534	0.0151736	-0.00220092	0.958721	0.0520372	0.341551	0.0407598	0.758253	0.0531297	0.078791	-0.0110307	1.06489	0.0844797	0.25162	0.599255	0.955965	0.00583662
47	rs32016169	1	14.7639	0.0151736	-0.00220092	0.958721	0.0520372	0.341551	0.0407598	0.758253	0.0531297	0.078791	-0.0110307	1.06489	0.0844797	0.25162	0.599255	0.955965	0.00583662
48	rs6291839	1	14.7971	0.0151736	-0.00220092	0.958721	0.0520372	0.341551	0.0407598	0.758253	0.0531297	0.078791	-0.0110307	1.06489	0.0844797	0.25162	0.599255	0.955965	0.00583662
49	rs32105394	1	14.909	0.0151736	-0.00220092	0.958721	0.0520372	0.341551	0.0407598	0.758253	0.0531297	0.078791	-0.0110307	1.06489	0.0844797	0.25162	0.599255	0.955965	0.00583662
50	rs3088964	1	15.2068	0.346638	0.037644	1.13861	0.0569126	0.74586	0.0709866	0.897964	0.0582584	0.0803128	-0.0110144	1.57974	0.105661	0.0369113	1.43284	0.954471	0.00575271
51	rs30752472	1	15.4099	0.346638	0.037644	1.13861	0.0569126	0.74586	0.0709866	0.897964	0.0582584	0.0803128	-0.0110144	1.57974	0.105661	0.0369113	1.43284	0.954471	0.00575271
52	rs3678179	1	15.5082	0.346638	0.037644	1.13861	0.0569126	0.74586	0.0709866	0.897964	0.0582584	0.0803128	-0.0110144	1.57974	0.105661	0.0369113	1.43284	0.954471	0.00575271
53	rs32109300	1	15.8174	0.346638	0.037644	1.13861	0.0569126	0.74586	0.0709866	0.897964	0.0582584	0.0803128	-0.0110144	1.57974	0.105661	0.0369113	1.43284	0.954471	0.00575271
54	rs32127151	1	15.9813	0.346638	0.037644	1.13861	0.0569126	0.74586	0.0709866	0.897964	0.0582584	0.0803128	-0.0110144	1.57974	0.105661	0.0369113	1.43284	0.954471	0.00575271
55	rs47275793	1	16.1066	0.252499	0.0295798	0.516316	0.0337602	0.413592	0.0468763	0.513319	0.0398469	0.50554	-0.0528976	1.16798	0.0893615	0.214426	0.668723	0.442816	0.00336726
56	rs32039596	1	16.7243	0.304701	0.0347767	0.818317	0.0470125	0.582861	0.0610266	0.710878	0.0507976	0.270773	-0.0327493	1.40398	0.100851	0.0924107	1.03428	0.693525	0.00472676
57	rs51394091	1	17.255	0.252499	0.0295798	0.516316	0.0337602	0.413592	0.0468763	0.513319	0.0398469	0.50554	-0.0528976	1.16798	0.0893615	0.214426	0.668723	0.442816	0.00336726
58	rs31817535	1	17.2591	0.252499	0.0295798	0.516316	0.0337602	0.413592	0.0468763	0.513319	0.0398469	0.50554	-0.0528976	1.16798	0.0893615	0.214426	0.668723	0.442816	0.00336726
59	rs32171777	1	17.396	0.252499	0.0295798	0.516316	0.0337602	0.413592	0.0468763	0.513319	0.0398469	0.50554	-0.0528976	1.16798	0.0893615	0.214426	0.668723	0.442816	0.00336726
60	rs32043384	1	18.1688	0.016041	0.00222642	0.491884	0.0314514	0.151863	0.0198461	0.506502	0.0381258	0.608144	-0.0589763	1.15884	0.085887	0.333208	0.477285	0.539782	0.0038347
61	rs219716413	1	18.4966	0.016041	0.00222642	0.491884	0.0314514	0.151863	0.0198461	0.506502	0.0381258	0.608144	-0.0589763	1.15884	0.085887	0.333208	0.477285	0.539782	0.0038347
62	rs13475747	1	18.6056	0.342394	-0.036921	0.3608	0.0251488	0.0798836	-0.0112746	0.389387	0.0316306	0.611769	-0.0599242	0.721107	0.0633818	0.483499	0.315604	0.535179	0.00384225
63	rs51820747	1	18.7905	0.342394	-0.036921	0.3608	0.0251488	0.0798836	-0.0112746	0.389387	0.0316306	0.611769	-0.0599242	0.721107	0.0633818	0.483499	0.315604	0.535179	0.00384225
64	rs51700370	1	18.8237	0.342394	-0.036921	0.3608	0.0251488	0.0798836	-0.0112746	0.389387	0.0316306	0.611769	-0.0599242	0.721107	0.0633818	0.483499	0.315604	0.535179	0.00384225
65	rs52118613	1	18.872	0.342394	-0.036921	0.3608	0.0251488	0.0798836	-0.0112746	0.389387	0.0316306	0.611769	-0.0599242	0.721107	0.0633818	0.483499	0.315604	0.535179	0.00384225
66	rs31772262	1	20.6235	0.342394	-0.036921	0.3608	0.0251488	0.0798836	-0.0112746	0.389387	0.0316306	0.611769	-0.0599242	0.721107	0.0633818	0.483499	0.315604	0.535179	0.00384225
67	rs3670611	1	20.6338	0.342394	-0.036921	0.3608	0.0251488	0.0798836	-0.0112746	0.389387	0.0316306	0.611769	-0.0599242	0.721107	0.0633818	0.483499	0.315604	0.535179	0.00384225
68	rs224386739	1	20.6421	0.342394	-0.036921	0.3608	0.0251488	0.0798836	-0.0112746	0.389387	0.0316306	0.611769	-0.0599242	0.721107	0.0633818	0.483499	0.315604	0.535179	0.00384225
69	rs36660068	1	20.7752	0.342394	-0.036921	0.3608	0.0251488	0.0798836	-0.0112746	0.389387	0.0316306	0.611769	-0.0599242	0.721107	0.0633818	0.483499	0.315604	0.535179	0.00384225
70	rs6404446	1	20.7842	0.342394	-0.036921	0.3608	0.0251488	0.0798836	-0.0112746	0.389387	0.0316306	0.611769	-0.0599242	0.721107	0.0633818	0.483499	0.315604	0.535179	0.00384225
71	rs32101154	1	21.5913	0.342394	-0.036921	0.3608	0.0251488	0.0798836	-0.0112746	0.389387	0.0316306	0.611769	-0.0599242	0.721107	0.0633818	0.483499	0.315604	0.535179	0.00384225
72	rs6253968	1	21.6385	0.371868	-0.0397357	0.350853	0.0247679	0.104082	-0.0144889	0.391925	0.0320891	0.723402	-0.0679242	0.717469	0.0637955	0.425981	0.37061	0.459596	0.00343908
73	rs32315565	1	21.641	0.371868	-0.0397357	0.350853	0.0247679	0.104082	-0.0144889	0.391925	0.0320891	0.723402	-0.0679242	0.717469	0.0637955	0.425981	0.37061	0.459596	0.00343908
74	rs31766107	1	22.0621	0.714421	-0.0603379	0.18949	0.0140401	0.178309	-0.0216725	0.263784	0.0218359	1.16392	-0.0896147	0.391123	0.0383395	0.343441	0.464148	0.599998	0.00406685
75	rs46856073	1	22.1045	0.714421	-0.0603379	0.18949	0.0140401	0.178309	-0.0216725	0.263784	0.0218359	1.16392	-0.0896147	0.391123	0.0383395	0.343441	0.464148	0.599998	0.00406685
76	rs46249537	1	22.1046	0.714421	-0.0603379	0.18949	0.0140401	0.178309	-0.0216725	0.263784	0.0218359	1.16392	-0.0896147	0.391123	0.0383395	0.343441	0.464148	0.599998	0.00406685
77	rs31949292	1	22.1684	0.714421	-0.0603379	0.18949	0.0140401	0.178309	-0.0216725	0.263784	0.0218359	1.16392	-0.0896147	0.391123	0.0383395	0.343441	0.464148	0.599998	0.00406685
78	rs30499557	1	22.4005	0.714421	-0.0603379	0.18949	0.0140401	0.178309	-0.0216725	0.263784	0.0218359	1.16392	-0.0896147	0.391123	0.0383395	0.343441	0.464148	0.599998	0.00406685
79	rs6316488	1	23.145	0.617868	-0.0558437	0.28267	0.0200479	0.0348502	0.00494913	0.405	0.0314851	0.762662	-0.0685583	0.45552	0.0440557	0.46329	0.334147	1.05318	0.0060467
80	rs32400861	1	23.1521	0.382682	-0.0368285	0.525268	0.0305229	0.140628	0.0170237	0.353415	0.0267164	0.381377	-0.0388319	0.218558	0.0233201	0.684101	0.16488	0.302058	0.00233572
81	rs32597415	1	23.3794	0.382682	-0.0368285	0.525268	0.0305229	0.140628	0.0170237	0.353415	0.0267164	0.381377	-0.0388319	0.218558	0.0233201	0.684101	0.16488	0.302058	0.00233572
82	rs228543676	1	23.496	0.382682	-0.0368285	0.525268	0.0305229	0.140628	0.0170237	0.353415	0.0267164	0.381377	-0.0388319	0.218558	0.0233201	0.684101	0.16488	0.302058	0.00233572
83	rs239824187	1	23.5768	0.99839	-0.0731792	0.247227	0.0170876	0.00990811	0.00136399	0.230059	0.0189096	0.777963	-0.0657503	0.113055	0.0131454	0.533668	0.272729	0.392774	0.00285824
84	rs13475765	1	23.8152	0.99839	-0.0731792	0.247227	0.0170876	0.00990811	0.00136399	0.230059	0.0189096	0.777963	-0.0657503	0.113055	0.0131454	0.533668	0.272729	0.392774	0.00285824
85	rs4222215	1	23.9961	0.99839	-0.0731792	0.247227	0.0170876	0.00990811	0.00136399	0.230059	0.0189096	0.777963	-0.0657503	0.113055	0.0131454	0.533668	0.272729	0.392774	0.00285824
86	rs13475766	1	24.1093	0.99839	-0.0731792	0.247227	0.0170876	0.00990811	0.00136399	0.230059	0.0189096	0.777963	-0.0657503	0.113055	0.0131454	0.533668	0.272729	0.392774	0.00285824
87	rs31567874	1	25.2373	0.99839	-0.0731792	0.247227	0.0170876	0.00990811	0.00136399	0.230059	0.0189096	0.777963	-0.0657503	0.113055	0.0131454	0.533668	0.272729	0.392774	0.00285824
88	rs32245765	1	25.2986	0.825425	-0.068533	0.00130898	0.000120969	0.132702	-0.0172562	0.0608742	0.00615892	1.55474	-0.108656	0.132653	-0.0162485	0.408754	0.388538	0.139217	0.00127472
89	rs32487442	1	25.351	1.03667	-0.0792965	0.172096	-0.0134894	0.273464	-0.0317766	0.060684	0.0061176	1.93402	-0.123748	0.0980238	-0.0123287	0.170925	0.767194	0.0861276	0.00082668
90	rs13475771	1	25.4325	1.03667	-0.0792965	0.172096	-0.0134894	0.273464	-0.0317766	0.060684	0.0061176	1.93402	-0.123748	0.0980238	-0.0123287	0.170925	0.767194	0.0861276	0.00082668
91	rs13475772	1	25.5754	0.276196	-0.0299143	0.0767578	0.00649357	0.089762	0.012043	0.231172	0.0201027	1.09123	-0.0864705	0.0359922	0.0047821	0.761719	0.118205	0.187889	-0.00163257
92	rs32249228	1	25.701	0.394119	-0.0433814	0.212014	0.0175142	0.185956	0.0252122	0.61575	0.0472566	0.975885	-0.0878688	0.446348	0.0477484	0.366649	0.43575	0.692287	0.00496046
93	rs32331653	1	25.8277	0.394119	-0.0433814	0.212014	0.0175142	0.185956	0.0252122	0.61575	0.0472566	0.975885	-0.0878688	0.446348	0.0477484	0.366649	0.43575	0.692287	0.00496046
94	rs32086436	1	26.8588	0.394119	-0.0433814	0.212014	0.0175142	0.185956	0.0252122	0.61575	0.0472566	0.975885	-0.0878688	0.446348	0.0477484	0.366649	0.43575	0.692287	0.00496046
95	rs48222526	1	27.2534	0.394119	-0.0433814	0.212014	0.0175142	0.185956	0.0252122	0.61575	0.0472566	0.975885	-0.0878688	0.446348	0.0477484	0.366649	0.43575	0.692287	0.00496046
96	rs223334166	1	27.3063	0.528064	-0.0543027	0.536553	0.0367614	0.40094	0.0473147	1.06656	0.0693996	0.81056	-0.0777107	0.429566	0.0464689	0.136137	0.866023	0.53733	0.00414629
97	rs31670161	1	28.5022	0.528064	-0.0543027	0.536553	0.0367614	0.40094	0.0473147	1.06656	0.0693996	0.81056	-0.0777107	0.429566	0.0464689	0.136137	0.866023	0.53733	0.00414629
98	rs31134323	1	28.7615	0.528064	-0.0543027	0.536553	0.0367614	0.40094	0.0473147	1.06656	0.0693996	0.81056	-0.0777107	0.429566	0.0464689	0.136137	0.866023	0.53733	0.00414629
99	rs47868189	1	29.0766	0.528064	-0.0543027	0.536553	0.0367614	0.40094	0.0473147	1.06656	0.0693996	0.81056	-0.0777107	0.429566	0.0464689	0.136137	0.866023	0.53733	0.00414629
100	rs31600419	1	29.0885	0.528064	-0.0543027	0.536553	0.0367614	0.40094	0.0473147	1.06656	0.0693996	0.81056	-0.0777107	0.429566	0.0464689	0.136137	0.866023	0.53733	0.00414629
101	rs30514876	1	29.1559	0.528064	-0.0543027	0.536553	0.0367614	0.40094	0.0473147	1.06656	0.0693996	0.81056	-0.0777107	0.429566	0.0464689	0.136137	0.866023	0.53733	0.00414629
102	rs32110348	1	30.1265	0.528064	-0.0543027	0.536553	0.0367614	0.40094	0.0473147	1.06656	0.0693996	0.81056	-0.0777107	0.429566	0.0464689	0.136137	0.866023	0.53733	0.00414629
103	rs31590459	1	30.7018	0.528064	-0.0543027	0.536553	0.0367614	0.40094	0.0473147	1.06656	0.0693996	0.81056	-0.0777107	0.429566	0.0464689	0.136137	0.866023	0.53733	0.00414629
104	rs32372810	1	30.8135	0.528064	-0.0543027	0.536553	0.0367614	0.40094	0.0473147	1.06656	0.0693996	0.81056	-0.0777107	0.429566	0.0464689	0.136137	0.866023	0.53733	0.00414629
105	rs32684509	1	30.8512	0.528064	-0.0543027	0.536553	0.0367614	0.40094	0.0473147	1.06656	0.0693996	0.81056	-0.0777107	0.429566	0.0464689	0.136137	0.866023	0.53733	0.00414629
106	rs230225148	1	31.0627	0.528064	-0.0543027	0.536553	0.0367614	0.40094	0.0473147	1.06656	0.0693996	0.81056	-0.0777107	0.429566	0.0464689	0.136137	0.866023	0.53733	0.00414629
107	rs48664698	1	31.6595	0.528064	-0.0543027	0.536553	0.0367614	0.40094	0.0473147	1.06656	0.0693996	0.81056	-0.0777107	0.429566	0.0464689	0.136137	0.866023	0.53733	0.00414629
108	rs32760971	1	32.0822	0.528064	-0.0543027	0.536553	0.0367614	0.40094	0.0473147	1.06656	0.0693996	0.81056	-0.0777107	0.429566	0.0464689	0.136137	0.866023	0.53733	0.00414629
109	rs31818207	1	32.1592	0.528064	-0.0543027	0.536553	0.0367614	0.40094	0.0473147	1.06656	0.0693996	0.81056	-0.0777107	0.429566	0.0464689	0.136137	0.866023	0.53733	0.00414629
110	rs30598074	1	32.3438	0.31476	0.0353417	0.992914	0.0545393	0.935719	0.0845639	2.62632	0.114986	0.00613097	0.000935942	0.585033	0.0569325	0.0141357	1.84968	0.397598	0.00322738
111	rs13475795	1	32.4984	0.31476	0.0353417	0.992914	0.0545393	0.935719	0.0845639	2.62632	0.114986	0.00613097	0.000935942	0.585033	0.0569325	0.0141357	1.84968	0.397598	0.00322738
112	rs30849932	1	33.3683	0.31476	0.0353417	0.992914	0.0545393	0.935719	0.0845639	2.62632	0.114986	0.00613097	0.000935942	0.585033	0.0569325	0.0141357	1.84968	0.397598	0.00322738
113	rs46323879	1	33.7216	0.31476	0.0353417	0.992914	0.0545393	0.935719	0.0845639	2.62632	0.114986	0.00613097	0.000935942	0.585033	0.0569325	0.0141357	1.84968	0.397598	0.00322738
114	rs31518908	1	34.163	0.31476	0.0353417	0.992914	0.0545393	0.935719	0.0845639	2.62632	0.114986	0.00613097	0.000935942	0.585033	0.0569325	0.0141357	1.84968	0.397598	0.00322738
115	rs31710287	1	34.5364	0.31476	0.0353417	0.992914	0.0545393	0.935719	0.0845639	2.62632	0.114986	0.00613097	0.000935942	0.585033	0.0569325	0.0141357	1.84968	0.397598	0.00322738
116	rs16808053	1	34.5525	0.31476	0.0353417	0.992914	0.0545393	0.935719	0.0845639	2.62632	0.114986	0.00613097	0.000935942	0.585033	0.0569325	0.0141357	1.84968	0.397598	0.00322738
117	rs221967485	1	34.9518	0.31476	0.0353417	0.992914	0.0545393	0.935719	0.0845639	2.62632	0.114986	0.00613097	0.000935942	0.585033	0.0569325	0.0141357	1.84968	0.397598	0.00322738
118	rs47717565	1	35.1905	0.31476	0.0353417	0.992914	0.0545393	0.935719	0.0845639	2.62632	0.114986	0.00613097	0.000935942	0.585033	0.0569325	0.0141357	1.84968	0.397598	0.00322738
119	rs13475808	1	35.5385	0.31476	0.0353417	0.992914	0.0545393	0.935719	0.0845639	2.62632	0.114986	0.00613097	0.000935942	0.585033	0.0569325	0.0141357	1.84968	0.397598	0.00322738
120	rs30604008	1	35.724	0.31476	0.0353417	0.992914	0.0545393	0.935719	0.0845639	2.62632	0.114986	0.00613097	0.000935942	0.585033	0.0569325	0.0141357	1.84968	0.397598	0.00322738
121	rs30525912	1	35.9354	0.31476	0.0353417	0.992914	0.0545393	0.935719	0.0845639	2.62632	0.114986	0.00613097	0.000935942	0.585033	0.0569325	0.0141357	1.84968	0.397598	0.00322738
122	rs13475810	1	35.9957	0.31476	0.0353417	0.992914	0.0545393	0.935719	0.0845639	2.62632	0.114986	0.00613097	0.000935942	0.585033	0.0569325	0.0141357	1.84968	0.397598	0.00322738
123	rs13475816	1	37.5579	0.31476	0.0353417	0.992914	0.0545393	0.935719	0.0845639	2.62632	0.114986	0.00613097	0.000935942	0.585033	0.0569325	0.0141357	1.84968	0.397598	0.00322738
124	rs32180312	1	37.6324	0.31476	0.0353417	0.992914	0.0545393	0.935719	0.0845639	2.62632	0.114986	0.00613097	0.000935942	0.585033	0.0569325	0.0141357	1.84968	0.397598	0.00322738
125	rs31935537	1	37.6392	0.305625	0.032727	0.940809	0.0498731	1.02182	0.0846204	2.40153	0.103581	0.0333993	0.00471788	0.698013	0.0610621	0.0154343	1.81151	0.592807	0.00419427
126	rs32551229	1	37.6706	0.305625	0.032727	0.940809	0.0498731	1.02182	0.0846204	2.40153	0.103581	0.0333993	0.00471788	0.698013	0.0610621	0.0154343	1.81151	0.592807	0.00419427
127	rs32942136	1	37.6857	0.305625	0.032727	0.940809	0.0498731	1.02182	0.0846204	2.40153	0.103581	0.0333993	0.00471788	0.698013	0.0610621	0.0154343	1.81151	0.592807	0.00419427
128	rs32635513	1	37.7107	0.305625	0.032727	0.940809	0.0498731	1.02182	0.0846204	2.40153	0.103581	0.0333993	0.00471788	0.698013	0.0610621	0.0154343	1.81151	0.592807	0.00419427
129	rs3705697	1	37.82	0.305625	0.032727	0.940809	0.0498731	1.02182	0.0846204	2.40153	0.103581	0.0333993	0.00471788	0.698013	0.0610621	0.0154343	1.81151	0.592807	0.00419427
130	Affy_10345622	1	37.894	0.413222	0.0411906	0.532976	0.0330854	0.702833	0.0650553	1.70356	0.0837808	0.0348297	-0.00486909	0.711054	0.0615162	0.0916109	1.03805	0.743485	0.0049004
131	Affy_5433680	1	38.1283	0.413222	0.0411906	0.532976	0.0330854	0.702833	0.0650553	1.70356	0.0837808	0.0348297	-0.00486909	0.711054	0.0615162	0.0916109	1.03805	0.743485	0.0049004
132	rs32988364	1	38.2256	0.413222	0.0411906	0.532976	0.0330854	0.702833	0.0650553	1.70356	0.0837808	0.0348297	-0.00486909	0.711054	0.0615162	0.0916109	1.03805	0.743485	0.0049004
133	rs31528685	1	38.3947	0.413222	0.0411906	0.532976	0.0330854	0.702833	0.0650553	1.70356	0.0837808	0.0348297	-0.00486909	0.711054	0.0615162	0.0916109	1.03805	0.743485	0.0049004
134	rs30611861	1	38.4771	0.413222	0.0411906	0.532976	0.0330854	0.702833	0.0650553	1.70356	0.0837808	0.0348297	-0.00486909	0.711054	0.0615162	0.0916109	1.03805	0.743485	0.0049004
135	rs31574517	1	39.0161	0.392964	0.0400085	0.393054	0.0265686	0.57276	0.0568886	1.57361	0.080751	0.0142778	-0.00205853	0.582006	0.0539385	0.180045	0.744618	0.628906	0.00438755
136	rs30868358	1	39.0207	0.392964	0.0400085	0.393054	0.0265686	0.57276	0.0568886	1.57361	0.080751	0.0142778	-0.00205853	0.582006	0.0539385	0.180045	0.744618	0.628906	0.00438755
137	rs31440687	1	39.1404	0.370217	0.0385798	0.504702	0.0324224	0.675598	0.0646834	1.66647	0.0844813	0.00143763	0.000211687	0.350374	0.037076	0.172118	0.764173	0.637266	0.00445142
138	rs51951745	1	39.1412	0.370217	0.0385798	0.504702	0.0324224	0.675598	0.0646834	1.66647	0.0844813	0.00143763	0.000211687	0.350374	0.037076	0.172118	0.764173	0.637266	0.00445142
139	rs31449667	1	39.2324	0.370217	0.0385798	0.504702	0.0324224	0.675598	0.0646834	1.66647	0.0844813	0.00143763	0.000211687	0.350374	0.037076	0.172118	0.764173	0.637266	0.00445142
140	rs33132305	1	39.2615	0.370217	0.0385798	0.504702	0.0324224	0.675598	0.0646834	1.66647	0.0844813	0.00143763	0.000211687	0.350374	0.037076	0.172118	0.764173	0.637266	0.00445142
141	rs30551147	1	39.2623	0.370217	0.0385798	0.504702	0.0324224	0.675598	0.0646834	1.66647	0.0844813	0.00143763	0.000211687	0.350374	0.037076	0.172118	0.764173	0.637266	0.00445142
142	rs13475821	1	39.5219	0.339581	0.0355862	0.354792	0.0244774	0.528557	0.0535836	1.47781	0.0776235	0.0217204	0.00308687	0.243293	0.0273188	0.323092	0.490674	0.514001	0.00376045
143	rs36367128	1	40.8669	0.203135	-0.0217835	0.241681	-0.0168527	0.197	-0.0225673	0.425348	0.0306	0.667832	-0.0590001	0.0869915	-0.0103232	0.753913	0.122679	0.708248	0.00452041
144	rs32764284	1	40.8747	0.00466879	-0.000628408	0.252433	-0.0183005	0.0229985	-0.00324977	0.439479	0.0330009	0.57754	-0.0550844	0.110435	-0.0134659	0.889864	0.0506766	0.607291	0.00414175
145	rs37147416	1	40.9318	0.00466879	-0.000628408	0.252433	-0.0183005	0.0229985	-0.00324977	0.439479	0.0330009	0.57754	-0.0550844	0.110435	-0.0134659	0.889864	0.0506766	0.607291	0.00414175
146	rs13475829	1	41.2901	0.134704	-0.0166127	0.350909	-0.0247771	0.123161	-0.0163691	0.132019	0.0126722	0.631131	-0.0608436	0.0484081	-0.00648021	0.886406	0.0523673	0.544828	0.00395011
147	rs52625624	1	41.5848	0.134704	-0.0166127	0.350909	-0.0247771	0.123161	-0.0163691	0.132019	0.0126722	0.631131	-0.0608436	0.0484081	-0.00648021	0.886406	0.0523673	0.544828	0.00395011
148	rs48741666	1	41.6128	0.134704	-0.0166127	0.350909	-0.0247771	0.123161	-0.0163691	0.132019	0.0126722	0.631131	-0.0608436	0.0484081	-0.00648021	0.886406	0.0523673	0.544828	0.00395011
149	rs30667783	1	41.7968	0.134704	-0.0166127	0.350909	-0.0247771	0.123161	-0.0163691	0.132019	0.0126722	0.631131	-0.0608436	0.0484081	-0.00648021	0.886406	0.0523673	0.544828	0.00395011
150	rs29552839	1	42.0963	0.134704	-0.0166127	0.350909	-0.0247771	0.123161	-0.0163691	0.132019	0.0126722	0.631131	-0.0608436	0.0484081	-0.00648021	0.886406	0.0523673	0.544828	0.00395011
151	rs29633641	1	42.0978	0.134704	-0.0166127	0.350909	-0.0247771	0.123161	-0.0163691	0.132019	0.0126722	0.631131	-0.0608436	0.0484081	-0.00648021	0.886406	0.0523673	0.544828	0.00395011
152	rs31864177	1	42.1353	0.134704	-0.0166127	0.350909	-0.0247771	0.123161	-0.0163691	0.132019	0.0126722	0.631131	-0.0608436	0.0484081	-0.00648021	0.886406	0.0523673	0.544828	0.00395011
153	rs13475833	1	42.1597	0.134704	-0.0166127	0.350909	-0.0247771	0.123161	-0.0163691	0.132019	0.0126722	0.631131	-0.0608436	0.0484081	-0.00648021	0.886406	0.0523673	0.544828	0.00395011
154	rs33275490	1	42.2476	0.134704	-0.0166127	0.350909	-0.0247771	0.123161	-0.0163691	0.132019	0.0126722	0.631131	-0.0608436	0.0484081	-0.00648021	0.886406	0.0523673	0.544828	0.00395011
155	rs3714219	1	42.2482	0.134704	-0.0166127	0.350909	-0.0247771	0.123161	-0.0163691	0.132019	0.0126722	0.631131	-0.0608436	0.0484081	-0.00648021	0.886406	0.0523673	0.544828	0.00395011
156	rs32671223	1	43.2156	0.22943	-0.0266647	0.774971	-0.0452308	0.189699	-0.0242211	0.000502639	-5.56899e-05	0.889496	-0.0783078	0.388921	-0.0409843	0.495935	0.304575	0.255542	0.00219281
157	rs33392587	1	43.3	0.22943	-0.0266647	0.774971	-0.0452308	0.189699	-0.0242211	0.000502639	-5.56899e-05	0.889496	-0.0783078	0.388921	-0.0409843	0.495935	0.304575	0.255542	0.00219281
158	rs52628759	1	43.4441	0.22943	-0.0266647	0.774971	-0.0452308	0.189699	-0.0242211	0.000502639	-5.56899e-05	0.889496	-0.0783078	0.388921	-0.0409843	0.495935	0.304575	0.255542	0.00219281
159	rs31652254	1	43.4871	0.22943	-0.0266647	0.774971	-0.0452308	0.189699	-0.0242211	0.000502639	-5.56899e-05	0.889496	-0.0783078	0.388921	-0.0409843	0.495935	0.304575	0.255542	0.00219281
160	rs32044299	1	43.5648	0.339421	-0.0333882	0.886221	-0.0451763	0.344933	-0.0357992	0.177653	-0.0150969	1.07692	-0.0824055	0.438604	-0.0408764	0.239792	0.620166	0.437928	0.00319405
161	rs31012703	1	43.6097	0.339421	-0.0333882	0.886221	-0.0451763	0.344933	-0.0357992	0.177653	-0.0150969	1.07692	-0.0824055	0.438604	-0.0408764	0.239792	0.620166	0.437928	0.00319405
162	rs33444638	1	43.6857	0.339421	-0.0333882	0.886221	-0.0451763	0.344933	-0.0357992	0.177653	-0.0150969	1.07692	-0.0824055	0.438604	-0.0408764	0.239792	0.620166	0.437928	0.00319405
163	rs33447118	1	43.6863	0.339421	-0.0333882	0.886221	-0.0451763	0.344933	-0.0357992	0.177653	-0.0150969	1.07692	-0.0824055	0.438604	-0.0408764	0.239792	0.620166	0.437928	0.00319405
164	rs33447121	1	43.6865	0.339421	-0.0333882	0.886221	-0.0451763	0.344933	-0.0357992	0.177653	-0.0150969	1.07692	-0.0824055	0.438604	-0.0408764	0.239792	0.620166	0.437928	0.00319405
165	rs47782085	1	43.7365	0.339421	-0.0333882	0.886221	-0.0451763	0.344933	-0.0357992	0.177653	-0.0150969	1.07692	-0.0824055	0.438604	-0.0408764	0.239792	0.620166	0.437928	0.00319405
166	rs50434840	1	43.8267	0.339421	-0.0333882	0.886221	-0.0451763	0.344933	-0.0357992	0.177653	-0.0150969	1.07692	-0.0824055	0.438604	-0.0408764	0.239792	0.620166	0.437928	0.00319405
167	rs30761526	1	44.0614	0.339421	-0.0333882	0.886221	-0.0451763	0.344933	-0.0357992	0.177653	-0.0150969	1.07692	-0.0824055	0.438604	-0.0408764	0.239792	0.620166	0.437928	0.00319405
168	rs31572802	1	44.0678	0.339421	-0.0333882	0.886221	-0.0451763	0.344933	-0.0357992	0.177653	-0.0150969	1.07692	-0.0824055	0.438604	-0.0408764	0.239792	0.620166	0.437928	0.00319405
169	rs31555041	1	44.1809	0.339421	-0.0333882	0.886221	-0.0451763	0.344933	-0.0357992	0.177653	-0.0150969	1.07692	-0.0824055	0.438604	-0.0408764	0.239792	0.620166	0.437928	0.00319405
170	rs31885358	1	44.4655	0.339421	-0.0333882	0.886221	-0.0451763	0.344933	-0.0357992	0.177653	-0.0150969	1.07692	-0.0824055	0.438604	-0.0408764	0.239792	0.620166	0.437928	0.00319405
171	rs31983590	1	45.5988	0.606692	-0.0526498	0.932908	-0.0476772	0.48496	-0.0471333	0.134927	-0.0120482	0.869398	-0.0726714	0.472144	-0.0438631	0.185675	0.731248	0.4925	0.00355287
172	rs33586566	1	45.915	0.606692	-0.0526498	0.932908	-0.0476772	0.48496	-0.0471333	0.134927	-0.0120482	0.869398	-0.0726714	0.472144	-0.0438631	0.185675	0.731248	0.4925	0.00355287
173	rs31954469	1	46.8475	0.606692	-0.0526498	0.932908	-0.0476772	0.48496	-0.0471333	0.134927	-0.0120482	0.869398	-0.0726714	0.472144	-0.0438631	0.185675	0.731248	0.4925	0.00355287
174	rs6321959	1	46.8687	0.606692	-0.0526498	0.932908	-0.0476772	0.48496	-0.0471333	0.134927	-0.0120482	0.869398	-0.0726714	0.472144	-0.0438631	0.185675	0.731248	0.4925	0.00355287
175	rs6322563	1	46.8688	0.606692	-0.0526498	0.932908	-0.0476772	0.48496	-0.0471333	0.134927	-0.0120482	0.869398	-0.0726714	0.472144	-0.0438631	0.185675	0.731248	0.4925	0.00355287
176	rs31612433	1	46.8968	0.606692	-0.0526498	0.932908	-0.0476772	0.48496	-0.0471333	0.134927	-0.0120482	0.869398	-0.0726714	0.472144	-0.0438631	0.185675	0.731248	0.4925	0.00355287
177	rs31745317	1	46.9082	0.381079	-0.0354656	0.756382	-0.0395205	0.323305	-0.0330128	0.0795826	0.00714998	0.78962	-0.0651976	0.544674	-0.0465921	0.351967	0.453499	0.546547	0.00368887
178	rs32434528	1	46.926	0.257454	-0.0255635	0.466682	-0.0274961	0.185387	-0.0206209	0.0785926	0.00699236	0.560658	-0.0504669	0.586097	-0.048662	0.630745	0.200146	0.622071	0.00402288
179	rs32093536	1	47.1899	0.0802329	-0.00918019	0.504862	-0.0293212	0.1202	-0.0141436	0.0911995	0.00804784	0.596725	-0.053154	0.255317	-0.0256596	0.816162	0.0882237	0.628297	0.0040759
180	rs31325347	1	47.2041	0.0802329	-0.00918019	0.504862	-0.0293212	0.1202	-0.0141436	0.0911995	0.00804784	0.596725	-0.053154	0.255317	-0.0256596	0.816162	0.0882237	0.628297	0.0040759
181	rs32602884	1	47.2042	0.0484021	0.00561872	0.435495	-0.0258646	0.0176232	-0.0022609	0.125476	0.0105996	0.588398	-0.0518806	0.146264	-0.0157579	0.901827	0.0448766	0.623606	0.00400932
182	rs32209957	1	50.8705	0.0484021	0.00561872	0.435495	-0.0258646	0.0176232	-0.0022609	0.125476	0.0105996	0.588398	-0.0518806	0.146264	-0.0157579	0.901827	0.0448766	0.623606	0.00400932
183	rs32662962	1	51.2263	0.0484021	0.00561872	0.435495	-0.0258646	0.0176232	-0.0022609	0.125476	0.0105996	0.588398	-0.0518806	0.146264	-0.0157579	0.901827	0.0448766	0.623606	0.00400932
184	rs31517020	1	51.3815	0.0484021	0.00561872	0.435495	-0.0258646	0.0176232	-0.0022609	0.125476	0.0105996	0.588398	-0.0518806	0.146264	-0.0157579	0.901827	0.0448766	0.623606	0.00400932
185	rs31565873	1	51.968	0.00779171	-0.000983558	0.95693	-0.047277	0.19534	-0.0222187	0.0414541	-0.00394124	1.25448	-0.0895792	0.326076	-0.0320154	0.382857	0.416963	0.248531	0.00200125
186	rs13475872	1	53.0115	0.00779171	-0.000983558	0.95693	-0.047277	0.19534	-0.0222187	0.0414541	-0.00394124	1.25448	-0.0895792	0.326076	-0.0320154	0.382857	0.416963	0.248531	0.00200125
187	rs32434080	1	54.0911	0.00779171	-0.000983558	0.95693	-0.047277	0.19534	-0.0222187	0.0414541	-0.00394124	1.25448	-0.0895792	0.326076	-0.0320154	0.382857	0.416963	0.248531	0.00200125
188	rs33840699	1	54.1738	0.00779171	-0.000983558	0.95693	-0.047277	0.19534	-0.0222187	0.0414541	-0.00394124	1.25448	-0.0895792	0.326076	-0.0320154	0.382857	0.416963	0.248531	0.00200125
189	rs51350456	1	54.1983	0.00779171	-0.000983558	0.95693	-0.047277	0.19534	-0.0222187	0.0414541	-0.00394124	1.25448	-0.0895792	0.326076	-0.0320154	0.382857	0.416963	0.248531	0.00200125
190	rs47870456	1	54.3103	0.00779171	-0.000983558	0.95693	-0.047277	0.19534	-0.0222187	0.0414541	-0.00394124	1.25448	-0.0895792	0.326076	-0.0320154	0.382857	0.416963	0.248531	0.00200125
191	rs29596070	1	54.4753	0.00779171	-0.000983558	0.95693	-0.047277	0.19534	-0.0222187	0.0414541	-0.00394124	1.25448	-0.0895792	0.326076	-0.0320154	0.382857	0.416963	0.248531	0.00200125
192	rs13475876	1	55.1275	0.127968	-0.0146691	1.12083	-0.0533557	0.318622	-0.0337664	0.30109	-0.0235395	1.33492	-0.0946746	0.249067	-0.0261998	0.195891	0.707986	0.248531	0.00200125
193	rs32516530	1	57.5964	0.153421	-0.0170734	0.871819	-0.0447947	0.230575	-0.0256321	0.0817016	-0.00750656	0.896799	-0.0732225	0.0586927	-0.00717062	0.566981	0.246431	0.547687	0.00367216
194	rs13475879	1	57.8254	0.153421	-0.0170734	0.871819	-0.0447947	0.230575	-0.0256321	0.0817016	-0.00750656	0.896799	-0.0732225	0.0586927	-0.00717062	0.566981	0.246431	0.547687	0.00367216
195	rs29655680	1	58.1156	0.0428334	-0.00509939	0.605856	-0.0335302	0.0724401	-0.008929	0.152191	0.0127586	0.788294	-0.0646154	0.272368	-0.0270681	0.710911	0.148185	0.55115	0.00368933
196	rs29659120	1	58.1411	0.108297	0.0125486	0.705217	-0.0388157	0.0259941	-0.00351116	0.0520341	0.00498543	1.26714	-0.091129	0.372535	-0.0361504	0.47363	0.324561	0.460607	0.00329453
197	rs29692016	1	58.1849	0.108297	0.0125486	0.705217	-0.0388157	0.0259941	-0.00351116	0.0520341	0.00498543	1.26714	-0.091129	0.372535	-0.0361504	0.47363	0.324561	0.460607	0.00329453
198	rs31726356	1	58.3764	0.108297	0.0125486	0.705217	-0.0388157	0.0259941	-0.00351116	0.0520341	0.00498543	1.26714	-0.091129	0.372535	-0.0361504	0.47363	0.324561	0.460607	0.00329453
199	rs31876473	1	58.4024	0.108297	0.0125486	0.705217	-0.0388157	0.0259941	-0.00351116	0.0520341	0.00498543	1.26714	-0.091129	0.372535	-0.0361504	0.47363	0.324561	0.460607	0.00329453
200	rs6325108	1	58.5868	0.108297	0.0125486	0.705217	-0.0388157	0.0259941	-0.00351116	0.0520341	0.00498543	1.26714	-0.091129	0.372535	-0.0361504	0.47363	0.324561	0.460607	0.00329453
201	rs31498570	1	59.0768	0.108297	0.0125486	0.705217	-0.0388157	0.0259941	-0.00351116	0.0520341	0.00498543	1.26714	-0.091129	0.372535	-0.0361504	0.47363	0.324561	0.460607	0.00329453
202	rs13475883	1	59.3791	0.0440974	-0.00547149	0.651929	-0.0367797	0.0620043	-0.00807624	0.0689883	-0.00650589	2.07364	-0.122723	0.470795	-0.0432841	0.213916	0.669757	0.553072	0.00378749
203	rs13475885	1	60.6441	0.0290482	-0.00363743	0.767022	-0.0411338	0.110197	-0.013626	0.0916192	-0.00840817	2.12779	-0.124537	0.269636	-0.0278198	0.208482	0.680931	0.550959	0.00378423
204	rs13475887	1	61.3869	0.0290482	-0.00363743	0.767022	-0.0411338	0.110197	-0.013626	0.0916192	-0.00840817	2.12779	-0.124537	0.269636	-0.0278198	0.208482	0.680931	0.550959	0.00378423
205	rs49196471	1	62.6092	0.0290482	-0.00363743	0.767022	-0.0411338	0.110197	-0.013626	0.0916192	-0.00840817	2.12779	-0.124537	0.269636	-0.0278198	0.208482	0.680931	0.550959	0.00378423
206	rs29963534	1	62.7258	0.0233038	-0.00293583	0.798093	-0.0423159	0.121574	-0.0148774	0.119883	-0.0107266	2.20614	-0.127517	0.193667	-0.0210943	0.193715	0.712837	0.54494	0.00376127
207	rs32161565	1	62.7841	0.0233038	-0.00293583	0.798093	-0.0423159	0.121574	-0.0148774	0.119883	-0.0107266	2.20614	-0.127517	0.193667	-0.0210943	0.193715	0.712837	0.54494	0.00376127
208	rs32416624	1	63.1448	0.0961597	-0.0112763	0.413225	-0.0261146	0.0458327	-0.00598885	0.0420382	-0.00403695	1.51531	-0.103967	0.00883446	-0.00114253	0.636181	0.196419	1.19247	0.00650209
209	rs3703813	1	63.5796	0.0961597	-0.0112763	0.413225	-0.0261146	0.0458327	-0.00598885	0.0420382	-0.00403695	1.51531	-0.103967	0.00883446	-0.00114253	0.636181	0.196419	1.19247	0.00650209
210	rs52470670	1	63.884	0.0961597	-0.0112763	0.413225	-0.0261146	0.0458327	-0.00598885	0.0420382	-0.00403695	1.51531	-0.103967	0.00883446	-0.00114253	0.636181	0.196419	1.19247	0.00650209
211	rs3162895	1	64.2014	0.0961597	-0.0112763	0.413225	-0.0261146	0.0458327	-0.00598885	0.0420382	-0.00403695	1.51531	-0.103967	0.00883446	-0.00114253	0.636181	0.196419	1.19247	0.00650209
212	rs30173232	1	64.6507	0.0961597	-0.0112763	0.413225	-0.0261146	0.0458327	-0.00598885	0.0420382	-0.00403695	1.51531	-0.103967	0.00883446	-0.00114253	0.636181	0.196419	1.19247	0.00650209
213	rs30465484	1	65.1636	0.0961597	-0.0112763	0.413225	-0.0261146	0.0458327	-0.00598885	0.0420382	-0.00403695	1.51531	-0.103967	0.00883446	-0.00114253	0.636181	0.196419	1.19247	0.00650209
214	rs45845149	1	65.1682	0.0961597	-0.0112763	0.413225	-0.0261146	0.0458327	-0.00598885	0.0420382	-0.00403695	1.51531	-0.103967	0.00883446	-0.00114253	0.636181	0.196419	1.19247	0.00650209
215	rs31727300	1	65.2197	0.0961597	-0.0112763	0.413225	-0.0261146	0.0458327	-0.00598885	0.0420382	-0.00403695	1.51531	-0.103967	0.00883446	-0.00114253	0.636181	0.196419	1.19247	0.00650209
216	rs32848413	1	65.5049	0.0961597	-0.0112763	0.413225	-0.0261146	0.0458327	-0.00598885	0.0420382	-0.00403695	1.51531	-0.103967	0.00883446	-0.00114253	0.636181	0.196419	1.19247	0.00650209
217	rs30230950	1	66.1587	0.0961597	-0.0112763	0.413225	-0.0261146	0.0458327	-0.00598885	0.0420382	-0.00403695	1.51531	-0.103967	0.00883446	-0.00114253	0.636181	0.196419	1.19247	0.00650209
218	rs32347478	1	66.1975	0.0961597	-0.0112763	0.413225	-0.0261146	0.0458327	-0.00598885	0.0420382	-0.00403695	1.51531	-0.103967	0.00883446	-0.00114253	0.636181	0.196419	1.19247	0.00650209
219	rs33859501	1	66.2017	0.0961597	-0.0112763	0.413225	-0.0261146	0.0458327	-0.00598885	0.0420382	-0.00403695	1.51531	-0.103967	0.00883446	-0.00114253	0.636181	0.196419	1.19247	0.00650209
220	rs30993227	1	66.3436	0.0961597	-0.0112763	0.413225	-0.0261146	0.0458327	-0.00598885	0.0420382	-0.00403695	1.51531	-0.103967	0.00883446	-0.00114253	0.636181	0.196419	1.19247	0.00650209
221	rs51246399	1	66.3558	0.0961597	-0.0112763	0.413225	-0.0261146	0.0458327	-0.00598885	0.0420382	-0.00403695	1.51531	-0.103967	0.00883446	-0.00114253	0.636181	0.196419	1.19247	0.00650209
222	rs30297732	1	66.6027	0.0961597	-0.0112763	0.413225	-0.0261146	0.0458327	-0.00598885	0.0420382	-0.00403695	1.51531	-0.103967	0.00883446	-0.00114253	0.636181	0.196419	1.19247	0.00650209
223	rs30284166	1	66.6369	0.0961597	-0.0112763	0.413225	-0.0261146	0.0458327	-0.00598885	0.0420382	-0.00403695	1.51531	-0.103967	0.00883446	-0.00114253	0.636181	0.196419	1.19247	0.00650209
224	rs3722989	1	66.7164	0.0961597	-0.0112763	0.413225	-0.0261146	0.0458327	-0.00598885	0.0420382	-0.00403695	1.51531	-0.103967	0.00883446	-0.00114253	0.636181	0.196419	1.19247	0.00650209
225	rs3665792	1	67.7772	0.0961597	-0.0112763	0.413225	-0.0261146	0.0458327	-0.00598885	0.0420382	-0.00403695	1.51531	-0.103967	0.00883446	-0.00114253	0.636181	0.196419	1.19247	0.00650209
226	rs13475907	1	68.0754	0.0961597	-0.0112763	0.413225	-0.0261146	0.0458327	-0.00598885	0.0420382	-0.00403695	1.51531	-0.103967	0.00883446	-0.00114253	0.636181	0.196419	1.19247	0.00650209
227	rs32080982	1	68.11	0.0961597	-0.0112763	0.413225	-0.0261146	0.0458327	-0.00598885	0.0420382	-0.00403695	1.51531	-0.103967	0.00883446	-0.00114253	0.636181	0.196419	1.19247	0.00650209
228	rs31292260	1	68.9289	0.0961597	-0.0112763	0.413225	-0.0261146	0.0458327	-0.00598885	0.0420382	-0.00403695	1.51531	-0.103967	0.00883446	-0.00114253	0.636181	0.196419	1.19247	0.00650209
229	rs48130521	1	68.9389	0.0961597	-0.0112763	0.413225	-0.0261146	0.0458327	-0.00598885	0.0420382	-0.00403695	1.51531	-0.103967	0.00883446	-0.00114253	0.636181	0.196419	1.19247	0.00650209
230	rs36768099	1	69.3128	0.0961597	-0.0112763	0.413225	-0.0261146	0.0458327	-0.00598885	0.0420382	-0.00403695	1.51531	-0.103967	0.00883446	-0.00114253	0.636181	0.196419	1.19247	0.00650209
231	rs13475913	1	70.0806	0.0961597	-0.0112763	0.413225	-0.0261146	0.0458327	-0.00598885	0.0420382	-0.00403695	1.51531	-0.103967	0.00883446	-0.00114253	0.636181	0.196419	1.19247	0.00650209
232	rs30948259	1	70.7595	0.0961597	-0.0112763	0.413225	-0.0261146	0.0458327	-0.00598885	0.0420382	-0.00403695	1.51531	-0.103967	0.00883446	-0.00114253	0.636181	0.196419	1.19247	0.00650209
233	rs37034472	1	72.5033	0.546698	-0.0481309	0.696326	-0.0385149	0.171419	-0.0200886	0.104258	-0.00944825	2.22547	-0.129998	0.160488	-0.0180168	0.11625	0.934609	1.4153	0.00720702
234	rs31200269	1	72.627	0.546698	-0.0481309	0.696326	-0.0385149	0.171419	-0.0200886	0.104258	-0.00944825	2.22547	-0.129998	0.160488	-0.0180168	0.11625	0.934609	1.4153	0.00720702
235	rs3687595	1	72.6887	0.546698	-0.0481309	0.696326	-0.0385149	0.171419	-0.0200886	0.104258	-0.00944825	2.22547	-0.129998	0.160488	-0.0180168	0.11625	0.934609	1.4153	0.00720702
236	rs238728371	1	73.1033	0.546698	-0.0481309	0.696326	-0.0385149	0.171419	-0.0200886	0.104258	-0.00944825	2.22547	-0.129998	0.160488	-0.0180168	0.11625	0.934609	1.4153	0.00720702
237	rs31428112	1	73.1117	0.546698	-0.0481309	0.696326	-0.0385149	0.171419	-0.0200886	0.104258	-0.00944825	2.22547	-0.129998	0.160488	-0.0180168	0.11625	0.934609	1.4153	0.00720702
238	rs13475920	1	73.2112	0.546698	-0.0481309	0.696326	-0.0385149	0.171419	-0.0200886	0.104258	-0.00944825	2.22547	-0.129998	0.160488	-0.0180168	0.11625	0.934609	1.4153	0.00720702
239	rs32184618	1	73.2222	0.546698	-0.0481309	0.696326	-0.0385149	0.171419	-0.0200886	0.104258	-0.00944825	2.22547	-0.129998	0.160488	-0.0180168	0.11625	0.934609	1.4153	0.00720702
240	rs13475921	1	73.4182	0.397662	-0.0383076	0.517489	-0.0313928	0.0425897	-0.00567515	0.120205	0.01087	1.38812	-0.0990699	0.141931	-0.0163764	0.444856	0.351781	0.693827	0.00456481
241	rs31377069	1	73.4906	0.397662	-0.0383076	0.517489	-0.0313928	0.0425897	-0.00567515	0.120205	0.01087	1.38812	-0.0990699	0.141931	-0.0163764	0.444856	0.351781	0.693827	0.00456481
242	rs13475923	1	74.0728	0.613066	-0.0520667	0.627597	-0.0355822	0.161648	-0.0189978	0.0371127	0.00357177	1.31797	-0.0942815	0.269127	-0.027761	0.304707	0.516117	0.424303	0.00312993
243	rs31890646	1	74.9165	0.613066	-0.0520667	0.627597	-0.0355822	0.161648	-0.0189978	0.0371127	0.00357177	1.31797	-0.0942815	0.269127	-0.027761	0.304707	0.516117	0.424303	0.00312993
244	rs32117726	1	75.5587	0.613066	-0.0520667	0.627597	-0.0355822	0.161648	-0.0189978	0.0371127	0.00357177	1.31797	-0.0942815	0.269127	-0.027761	0.304707	0.516117	0.424303	0.00312993
245	rs30858590	1	76.03	0.613066	-0.0520667	0.627597	-0.0355822	0.161648	-0.0189978	0.0371127	0.00357177	1.31797	-0.0942815	0.269127	-0.027761	0.304707	0.516117	0.424303	0.00312993
246	rs3699038	1	76.3901	0.613066	-0.0520667	0.627597	-0.0355822	0.161648	-0.0189978	0.0371127	0.00357177	1.31797	-0.0942815	0.269127	-0.027761	0.304707	0.516117	0.424303	0.00312993
247	rs30141894	1	76.4511	0.613066	-0.0520667	0.627597	-0.0355822	0.161648	-0.0189978	0.0371127	0.00357177	1.31797	-0.0942815	0.269127	-0.027761	0.304707	0.516117	0.424303	0.00312993
248	rs32326048	1	76.5217	0.613066	-0.0520667	0.627597	-0.0355822	0.161648	-0.0189978	0.0371127	0.00357177	1.31797	-0.0942815	0.269127	-0.027761	0.304707	0.516117	0.424303	0.00312993
249	rs31379580	1	76.6368	0.613066	-0.0520667	0.627597	-0.0355822	0.161648	-0.0189978	0.0371127	0.00357177	1.31797	-0.0942815	0.269127	-0.027761	0.304707	0.516117	0.424303	0.00312993
250	rs47192472	1	78.234	0.613066	-0.0520667	0.627597	-0.0355822	0.161648	-0.0189978	0.0371127	0.00357177	1.31797	-0.0942815	0.269127	-0.027761	0.304707	0.516117	0.424303	0.00312993
251	rs45948170	1	78.8596	0.614862	-0.0496363	0.423525	-0.0253186	0.087646	-0.0104329	0.223337	0.017398	0.846811	-0.0677181	0.0721513	-0.00830035	0.57689	0.238907	0.774451	0.00468749
252	rs46070989	1	78.9325	0.667922	-0.0560981	1.11022	-0.0531994	0.421944	-0.042279	0.22114	-0.0184063	1.81452	-0.115412	0.145921	-0.0167405	0.0637873	1.19527	0.353221	0.00275217
253	rs47823509	1	78.9405	0.606426	-0.0524703	1.01965	-0.0504167	0.499354	-0.0480797	0.401044	-0.0296341	1.25609	-0.0923132	0.268292	-0.0280392	0.0972052	1.01231	0.261836	0.00214622
254	rs30156746	1	79.6179	0.606426	-0.0524703	1.01965	-0.0504167	0.499354	-0.0480797	0.401044	-0.0296341	1.25609	-0.0923132	0.268292	-0.0280392	0.0972052	1.01231	0.261836	0.00214622
255	rs232937166	1	79.8062	0.606426	-0.0524703	1.01965	-0.0504167	0.499354	-0.0480797	0.401044	-0.0296341	1.25609	-0.0923132	0.268292	-0.0280392	0.0972052	1.01231	0.261836	0.00214622
256	rs31612855	1	80.3259	0.606426	-0.0524703	1.01965	-0.0504167	0.499354	-0.0480797	0.401044	-0.0296341	1.25609	-0.0923132	0.268292	-0.0280392	0.0972052	1.01231	0.261836	0.00214622
257	rs236370277	1	80.5559	0.606426	-0.0524703	1.01965	-0.0504167	0.499354	-0.0480797	0.401044	-0.0296341	1.25609	-0.0923132	0.268292	-0.0280392	0.0972052	1.01231	0.261836	0.00214622
258	rs30205785	1	80.7837	0.274342	-0.0289534	0.822988	-0.044258	0.394338	-0.0409049	0.310883	-0.0247028	0.760669	-0.0666482	0.0949392	-0.0115807	0.426502	0.370079	0.149879	0.00134235
259	rs13475954	1	82.9044	0.312138	0.0338835	0.11785	-0.00983713	0.0142156	0.00210145	0.0797448	-0.00801631	0.353384	-0.039338	0.215776	0.0251243	0.956835	0.0191629	0.0758417	0.00073928
260	rs32668634	1	83.3891	0.312138	0.0338835	0.11785	-0.00983713	0.0142156	0.00210145	0.0797448	-0.00801631	0.353384	-0.039338	0.215776	0.0251243	0.956835	0.0191629	0.0758417	0.00073928
261	rs13475957	1	83.926	0.902321	0.0693407	0.163766	0.0123283	0.278167	0.0305673	0.0626376	-0.00597486	0.00953913	0.00132209	0.308472	0.031511	0.789532	0.10263	0.167003	0.00144944
262	rs32358097	1	84.7221	0.902321	0.0693407	0.163766	0.0123283	0.278167	0.0305673	0.0626376	-0.00597486	0.00953913	0.00132209	0.308472	0.031511	0.789532	0.10263	0.167003	0.00144944
263	rs3678377	1	85.7914	1.39374	0.100631	0.0396368	0.00362062	0.29309	0.0350932	0.249759	-0.0222641	0.0977154	0.0131949	0.0866701	0.0114108	0.620348	0.207365	0.145734	0.00134421
264	rs30804641	1	85.9441	1.39374	0.100631	0.0396368	0.00362062	0.29309	0.0350932	0.249759	-0.0222641	0.0977154	0.0131949	0.0866701	0.0114108	0.620348	0.207365	0.145734	0.00134421
265	rs31929413	1	86.2198	1.39374	0.100631	0.0396368	0.00362062	0.29309	0.0350932	0.249759	-0.0222641	0.0977154	0.0131949	0.0866701	0.0114108	0.620348	0.207365	0.145734	0.00134421
266	rs219816352	1	87.2699	1.39374	0.100631	0.0396368	0.00362062	0.29309	0.0350932	0.249759	-0.0222641	0.0977154	0.0131949	0.0866701	0.0114108	0.620348	0.207365	0.145734	0.00134421
267	rs50310397	1	87.2879	1.39374	0.100631	0.0396368	0.00362062	0.29309	0.0350932	0.249759	-0.0222641	0.0977154	0.0131949	0.0866701	0.0114108	0.620348	0.207365	0.145734	0.00134421
268	rs32104666	1	87.3388	1.39374	0.100631	0.0396368	0.00362062	0.29309	0.0350932	0.249759	-0.0222641	0.0977154	0.0131949	0.0866701	0.0114108	0.620348	0.207365	0.145734	0.00134421
269	rs51130709	1	87.4688	1.39374	0.100631	0.0396368	0.00362062	0.29309	0.0350932	0.249759	-0.0222641	0.0977154	0.0131949	0.0866701	0.0114108	0.620348	0.207365	0.145734	0.00134421
270	rs13475967	1	87.4896	1.39374	0.100631	0.0396368	0.00362062	0.29309	0.0350932	0.249759	-0.0222641	0.0977154	0.0131949	0.0866701	0.0114108	0.620348	0.207365	0.145734	0.00134421
271	rs48766014	1	87.5452	1.39374	0.100631	0.0396368	0.00362062	0.29309	0.0350932	0.249759	-0.0222641	0.0977154	0.0131949	0.0866701	0.0114108	0.620348	0.207365	0.145734	0.00134421
272	rs6234856	1	87.9164	1.21223	0.0930061	0.27737	0.0210436	0.532628	0.0565017	0.0236029	-0.00258378	0.185233	0.0233842	0.0755418	0.0101528	0.561532	0.250625	0.0571015	0.000572307
273	rs46281379	1	88.0989	1.21223	0.0930061	0.27737	0.0210436	0.532628	0.0565017	0.0236029	-0.00258378	0.185233	0.0233842	0.0755418	0.0101528	0.561532	0.250625	0.0571015	0.000572307
274	rs47858597	1	88.1379	1.21223	0.0930061	0.27737	0.0210436	0.532628	0.0565017	0.0236029	-0.00258378	0.185233	0.0233842	0.0755418	0.0101528	0.561532	0.250625	0.0571015	0.000572307
275	rs30307999	1	88.1646	1.21223	0.0930061	0.27737	0.0210436	0.532628	0.0565017	0.0236029	-0.00258378	0.185233	0.0233842	0.0755418	0.0101528	0.561532	0.250625	0.0571015	0.000572307
276	rs13475970	1	88.3498	1.21223	0.0930061	0.27737	0.0210436	0.532628	0.0565017	0.0236029	-0.00258378	0.185233	0.0233842	0.0755418	0.0101528	0.561532	0.250625	0.0571015	0.000572307
277	rs30341693	1	90.0878	1.21223	0.0930061	0.27737	0.0210436	0.532628	0.0565017	0.0236029	-0.00258378	0.185233	0.0233842	0.0755418	0.0101528	0.561532	0.250625	0.0571015	0.000572307
278	rs30337529	1	90.1859	1.21223	0.0930061	0.27737	0.0210436	0.532628	0.0565017	0.0236029	-0.00258378	0.185233	0.0233842	0.0755418	0.0101528	0.561532	0.250625	0.0571015	0.000572307
279	rs30330393	1	90.3123	1.21223	0.0930061	0.27737	0.0210436	0.532628	0.0565017	0.0236029	-0.00258378	0.185233	0.0233842	0.0755418	0.0101528	0.561532	0.250625	0.0571015	0.000572307
280	rs50175543	1	91.0978	0.7159	0.0684786	0.200521	0.0168046	0.280837	0.0360157	0.132303	-0.0136411	0.193413	0.0254009	0.093272	-0.0128773	0.826999	0.0824952	0.162937	-0.00154766
281	rs45885174	1	91.0982	0.7159	0.0684786	0.200521	0.0168046	0.280837	0.0360157	0.132303	-0.0136411	0.193413	0.0254009	0.093272	-0.0128773	0.826999	0.0824952	0.162937	-0.00154766
282	rs52508722	1	91.1004	0.676895	0.0650188	0.242765	0.0195346	0.309675	0.0384457	0.0654937	-0.00707997	0.256559	0.0319939	0.253211	-0.0304754	0.760421	0.118946	0.151397	-0.0014476
283	rs13475979	1	91.3223	0.676895	0.0650188	0.242765	0.0195346	0.309675	0.0384457	0.0654937	-0.00707997	0.256559	0.0319939	0.253211	-0.0304754	0.760421	0.118946	0.151397	-0.0014476
284	rs13475980	1	91.6534	0.676895	0.0650188	0.242765	0.0195346	0.309675	0.0384457	0.0654937	-0.00707997	0.256559	0.0319939	0.253211	-0.0304754	0.760421	0.118946	0.151397	-0.0014476
285	rs33082518	1	92.2571	0.676895	0.0650188	0.242765	0.0195346	0.309675	0.0384457	0.0654937	-0.00707997	0.256559	0.0319939	0.253211	-0.0304754	0.760421	0.118946	0.151397	-0.0014476
286	rs32252974	1	92.2952	0.676895	0.0650188	0.242765	0.0195346	0.309675	0.0384457	0.0654937	-0.00707997	0.256559	0.0319939	0.253211	-0.0304754	0.760421	0.118946	0.151397	-0.0014476
287	rs33069894	1	92.3733	0.0754958	0.0118523	0.0140624	0.00154557	0.444534	0.0579445	0.137039	0.0157478	0.207571	-0.0293676	0.349219	-0.0446121	0.932475	0.0303628	0.229699	-0.00223301
288	rs32182636	1	92.509	0.0754958	0.0118523	0.0140624	0.00154557	0.444534	0.0579445	0.137039	0.0157478	0.207571	-0.0293676	0.349219	-0.0446121	0.932475	0.0303628	0.229699	-0.00223301
289	rs13475984	1	92.7117	0.177318	0.0257464	0.248196	-0.0224309	0.19802	0.0304756	0.102001	-0.0121849	0.32726	-0.0429475	0.333052	-0.0432986	0.895612	0.0478803	0.118383	-0.00125281
290	rs30390109	1	93.1495	0.177318	0.0257464	0.248196	-0.0224309	0.19802	0.0304756	0.102001	-0.0121849	0.32726	-0.0429475	0.333052	-0.0432986	0.895612	0.0478803	0.118383	-0.00125281
291	rs3692309	1	93.2515	0.177318	0.0257464	0.248196	-0.0224309	0.19802	0.0304756	0.102001	-0.0121849	0.32726	-0.0429475	0.333052	-0.0432986	0.895612	0.0478803	0.118383	-0.00125281
292	rs3713135	1	93.6728	0.177318	0.0257464	0.248196	-0.0224309	0.19802	0.0304756	0.102001	-0.0121849	0.32726	-0.0429475	0.333052	-0.0432986	0.895612	0.0478803	0.118383	-0.00125281
293	rs4137444	1	93.6732	0.177318	0.0257464	0.248196	-0.0224309	0.19802	0.0304756	0.102001	-0.0121849	0.32726	-0.0429475	0.333052	-0.0432986	0.895612	0.0478803	0.118383	-0.00125281
294	rs32234269	1	94.0232	0.177318	0.0257464	0.248196	-0.0224309	0.19802	0.0304756	0.102001	-0.0121849	0.32726	-0.0429475	0.333052	-0.0432986	0.895612	0.0478803	0.118383	-0.00125281
295	rs31144348	1	94.2695	0.270025	0.0367157	0.0130939	-0.00145582	0.398105	0.0540541	0.0825434	0.0101102	0.313832	-0.0412324	0.63651	-0.0703359	0.793376	0.100521	0.582162	-0.00452675
296	rs32199840	1	94.3792	0.270025	0.0367157	0.0130939	-0.00145582	0.398105	0.0540541	0.0825434	0.0101102	0.313832	-0.0412324	0.63651	-0.0703359	0.793376	0.100521	0.582162	-0.00452675
297	rs13475991	1	94.5232	0.0291148	-0.00473033	0.137159	-0.013264	0.254716	0.0368121	0.00128276	0.000166719	0.768682	-0.0798218	1.00909	-0.0943364	0.604419	0.218662	0.401375	-0.00341168
298	rs31707646	1	95.0945	0.317249	0.0395238	0.00459658	-0.000491667	0.357388	0.0466234	0.0131796	0.00163512	0.430217	-0.0509773	0.86134	-0.0820177	0.691228	0.160379	0.559502	-0.00438
299	rs30558618	1	97.0192	0.317249	0.0395238	0.00459658	-0.000491667	0.357388	0.0466234	0.0131796	0.00163512	0.430217	-0.0509773	0.86134	-0.0820177	0.691228	0.160379	0.559502	-0.00438
300	rs13476003	1	97.7857	0.340532	0.0435552	0.000921377	-0.00010303	0.439435	0.0570974	0.0140055	0.00180925	0.421216	-0.0520602	0.806333	-0.0818711	0.675929	0.170099	0.453685	-0.00385245
301	rs13476004	1	98.0621	0.447651	0.0535215	0.30325	0.0262789	0.500702	0.0626726	0.180784	0.0199881	0.30804	-0.040848	0.254108	-0.0343316	0.687038	0.163019	0.216658	-0.0021726
302	rs30442897	1	98.3364	0.429781	0.0509759	0.290745	0.0249614	0.424733	0.0542565	0.176613	0.0192294	0.328184	-0.042249	0.313011	-0.0399056	0.699489	0.155219	0.312765	-0.00290612
303	rs13476006	1	98.6069	0.429781	0.0509759	0.290745	0.0249614	0.424733	0.0542565	0.176613	0.0192294	0.328184	-0.042249	0.313011	-0.0399056	0.699489	0.155219	0.312765	-0.00290612
304	rs31666743	1	98.7933	0.313078	0.038536	0.409981	0.0317669	0.636507	0.0710579	0.329825	0.0313344	0.203119	-0.0277839	0.423365	-0.0490804	0.557825	0.253502	0.451744	-0.00378466
305	rs32261404	1	99.2678	0.281659	0.0349355	0.259824	0.0218385	0.47963	0.0569326	0.244598	0.0242767	0.169747	-0.0236643	0.554765	-0.0594297	0.688749	0.161939	0.570521	-0.00448399
306	rs37486156	1	99.8898	0.281659	0.0349355	0.259824	0.0218385	0.47963	0.0569326	0.244598	0.0242767	0.169747	-0.0236643	0.554765	-0.0594297	0.688749	0.161939	0.570521	-0.00448399
307	rs36618375	1	99.8899	0.281659	0.0349355	0.259824	0.0218385	0.47963	0.0569326	0.244598	0.0242767	0.169747	-0.0236643	0.554765	-0.0594297	0.688749	0.161939	0.570521	-0.00448399
308	rs13476012	1	99.9049	0.281659	0.0349355	0.259824	0.0218385	0.47963	0.0569326	0.244598	0.0242767	0.169747	-0.0236643	0.554765	-0.0594297	0.688749	0.161939	0.570521	-0.00448399
309	rs30966514	1	100.765	0.281659	0.0349355	0.259824	0.0218385	0.47963	0.0569326	0.244598	0.0242767	0.169747	-0.0236643	0.554765	-0.0594297	0.688749	0.161939	0.570521	-0.00448399
310	rs51210174	1	101.005	0.281659	0.0349355	0.259824	0.0218385	0.47963	0.0569326	0.244598	0.0242767	0.169747	-0.0236643	0.554765	-0.0594297	0.688749	0.161939	0.570521	-0.00448399
311	rs13476025	1	103.725	0.821056	0.072579	0.286564	0.022252	0.707345	0.0714187	0.930601	0.0624077	0.147025	0.0197795	0.510291	-0.0525308	0.206781	0.684489	0.540815	-0.00403685
312	rs31806216	1	104.777	0.821056	0.072579	0.286564	0.022252	0.707345	0.0714187	0.930601	0.0624077	0.147025	0.0197795	0.510291	-0.0525308	0.206781	0.684489	0.540815	-0.00403685
313	rs13476030	1	104.877	0.511404	0.0526169	0.179937	0.0152728	0.362842	0.0440523	0.539588	0.0431374	0.102225	0.0144054	0.376231	-0.0422643	0.655987	0.183105	0.421119	-0.00334615
314	rs32565357	1	105.112	0.511404	0.0526169	0.179937	0.0152728	0.362842	0.0440523	0.539588	0.0431374	0.102225	0.0144054	0.376231	-0.0422643	0.655987	0.183105	0.421119	-0.00334615
315	rs32697536	1	105.583	0.511404	0.0526169	0.179937	0.0152728	0.362842	0.0440523	0.539588	0.0431374	0.102225	0.0144054	0.376231	-0.0422643	0.655987	0.183105	0.421119	-0.00334615
316	rs30506144	1	105.777	0.0735226	0.0107791	0.147666	0.0134896	0.172459	0.0248424	0.00972145	0.00118509	0.224446	-0.029808	0.400849	-0.0465632	0.966186	0.0149391	0.434702	-0.0036198
317	rs30488981	1	106.319	0.0735226	0.0107791	0.147666	0.0134896	0.172459	0.0248424	0.00972145	0.00118509	0.224446	-0.029808	0.400849	-0.0465632	0.966186	0.0149391	0.434702	-0.0036198
318	rs30487561	1	106.321	0.0735226	0.0107791	0.147666	0.0134896	0.172459	0.0248424	0.00972145	0.00118509	0.224446	-0.029808	0.400849	-0.0465632	0.966186	0.0149391	0.434702	-0.0036198
319	rs30484039	1	106.391	0.0735226	0.0107791	0.147666	0.0134896	0.172459	0.0248424	0.00972145	0.00118509	0.224446	-0.029808	0.400849	-0.0465632	0.966186	0.0149391	0.434702	-0.0036198
320	rs47647099	1	106.591	0.0735226	0.0107791	0.147666	0.0134896	0.172459	0.0248424	0.00972145	0.00118509	0.224446	-0.029808	0.400849	-0.0465632	0.966186	0.0149391	0.434702	-0.0036198
321	rs49762567	1	106.592	0.0735226	0.0107791	0.147666	0.0134896	0.172459	0.0248424	0.00972145	0.00118509	0.224446	-0.029808	0.400849	-0.0465632	0.966186	0.0149391	0.434702	-0.0036198
322	rs3680216	1	106.729	0.0735226	0.0107791	0.147666	0.0134896	0.172459	0.0248424	0.00972145	0.00118509	0.224446	-0.029808	0.400849	-0.0465632	0.966186	0.0149391	0.434702	-0.0036198
323	rs31994637	1	106.835	0.0735226	0.0107791	0.147666	0.0134896	0.172459	0.0248424	0.00972145	0.00118509	0.224446	-0.029808	0.400849	-0.0465632	0.966186	0.0149391	0.434702	-0.0036198
324	rs31960226	1	107.486	0.191698	0.0264507	0.209988	0.0188983	0.0184141	0.00320177	0.0494758	-0.00602384	0.216624	-0.0295861	0.391516	-0.0473814	0.959201	0.0180902	0.32344	-0.00290569
325	rs32738873	1	108.383	0.191698	0.0264507	0.209988	0.0188983	0.0184141	0.00320177	0.0494758	-0.00602384	0.216624	-0.0295861	0.391516	-0.0473814	0.959201	0.0180902	0.32344	-0.00290569
326	rs31744083	1	108.386	0.191698	0.0264507	0.209988	0.0188983	0.0184141	0.00320177	0.0494758	-0.00602384	0.216624	-0.0295861	0.391516	-0.0473814	0.959201	0.0180902	0.32344	-0.00290569
327	rs47329570	1	108.912	0.191698	0.0264507	0.209988	0.0188983	0.0184141	0.00320177	0.0494758	-0.00602384	0.216624	-0.0295861	0.391516	-0.0473814	0.959201	0.0180902	0.32344	-0.00290569
328	rs31960159	1	108.971	0.191698	0.0264507	0.209988	0.0188983	0.0184141	0.00320177	0.0494758	-0.00602384	0.216624	-0.0295861	0.391516	-0.0473814	0.959201	0.0180902	0.32344	-0.00290569
329	rs13476045	1	109.064	0.0550895	0.008084	0.0611133	0.0058913	0.126662	-0.0187231	0.385952	-0.0344185	0.692153	-0.068305	0.395544	-0.0451011	0.792522	0.100989	0.0433456	0.000462659
330	rs45843892	1	109.228	0.0550895	0.008084	0.0611133	0.0058913	0.126662	-0.0187231	0.385952	-0.0344185	0.692153	-0.068305	0.395544	-0.0451011	0.792522	0.100989	0.0433456	0.000462659
331	rs31935680	1	109.541	0.0550895	0.008084	0.0611133	0.0058913	0.126662	-0.0187231	0.385952	-0.0344185	0.692153	-0.068305	0.395544	-0.0451011	0.792522	0.100989	0.0433456	0.000462659
332	rs3685919	1	109.632	0.0550895	0.008084	0.0611133	0.0058913	0.126662	-0.0187231	0.385952	-0.0344185	0.692153	-0.068305	0.395544	-0.0451011	0.792522	0.100989	0.0433456	0.000462659
333	rs6319405	1	110.467	0.0550895	0.008084	0.0611133	0.0058913	0.126662	-0.0187231	0.385952	-0.0344185	0.692153	-0.068305	0.395544	-0.0451011	0.792522	0.100989	0.0433456	0.000462659
334	rs3710646	1	110.951	0.0550895	0.008084	0.0611133	0.0058913	0.126662	-0.0187231	0.385952	-0.0344185	0.692153	-0.068305	0.395544	-0.0451011	0.792522	0.100989	0.0433456	0.000462659
335	rs30584583	1	113.394	0.0550895	0.008084	0.0611133	0.0058913	0.126662	-0.0187231	0.385952	-0.0344185	0.692153	-0.068305	0.395544	-0.0451011	0.792522	0.100989	0.0433456	0.000462659
336	rs51800183	1	114.017	0.0550895	0.008084	0.0611133	0.0058913	0.126662	-0.0187231	0.385952	-0.0344185	0.692153	-0.068305	0.395544	-0.0451011	0.792522	0.100989	0.0433456	0.000462659
337	rs48823920	1	115.288	0.0550895	0.008084	0.0611133	0.0058913	0.126662	-0.0187231	0.385952	-0.0344185	0.692153	-0.068305	0.395544	-0.0451011	0.792522	0.100989	0.0433456	0.000462659
338	rs30719160	1	115.659	0.0725363	-0.0106776	0.41032	0.030769	0.0334531	0.00552476	0.14632	-0.0157142	0.210764	-0.0279304	0.0424853	-0.00643317	0.979178	0.00913825	0.308413	0.00261513
339	rs31471077	1	115.938	0.0725363	-0.0106776	0.41032	0.030769	0.0334531	0.00552476	0.14632	-0.0157142	0.210764	-0.0279304	0.0424853	-0.00643317	0.979178	0.00913825	0.308413	0.00261513
340	rs30675648	1	115.952	0.0725363	-0.0106776	0.41032	0.030769	0.0334531	0.00552476	0.14632	-0.0157142	0.210764	-0.0279304	0.0424853	-0.00643317	0.979178	0.00913825	0.308413	0.00261513
341	rs32180662	1	116.038	0.0725363	-0.0106776	0.41032	0.030769	0.0334531	0.00552476	0.14632	-0.0157142	0.210764	-0.0279304	0.0424853	-0.00643317	0.979178	0.00913825	0.308413	0.00261513
342	rs30680977	1	116.104	0.0725363	-0.0106776	0.41032	0.030769	0.0334531	0.00552476	0.14632	-0.0157142	0.210764	-0.0279304	0.0424853	-0.00643317	0.979178	0.00913825	0.308413	0.00261513
343	rs32807094	1	116.491	0.0725363	-0.0106776	0.41032	0.030769	0.0334531	0.00552476	0.14632	-0.0157142	0.210764	-0.0279304	0.0424853	-0.00643317	0.979178	0.00913825	0.308413	0.00261513
344	rs30637341	1	116.558	0.0725363	-0.0106776	0.41032	0.030769	0.0334531	0.00552476	0.14632	-0.0157142	0.210764	-0.0279304	0.0424853	-0.00643317	0.979178	0.00913825	0.308413	0.00261513
345	rs32757674	1	117.085	0.0725363	-0.0106776	0.41032	0.030769	0.0334531	0.00552476	0.14632	-0.0157142	0.210764	-0.0279304	0.0424853	-0.00643317	0.979178	0.00913825	0.308413	0.00261513
346	rs32268077	1	118.706	0.0725363	-0.0106776	0.41032	0.030769	0.0334531	0.00552476	0.14632	-0.0157142	0.210764	-0.0279304	0.0424853	-0.00643317	0.979178	0.00913825	0.308413	0.00261513
347	rs30725178	1	118.85	0.0246045	-0.00382413	0.929186	0.0551946	0.122768	0.0187202	0.075788	0.00868227	0.0596672	-0.00904272	0.124237	0.0174791	0.908138	0.041848	0.273599	0.00239577
348	rs30724278	1	118.853	0.0246045	-0.00382413	0.929186	0.0551946	0.122768	0.0187202	0.075788	0.00868227	0.0596672	-0.00904272	0.124237	0.0174791	0.908138	0.041848	0.273599	0.00239577
349	rs30698282	1	118.988	0.0707858	0.00980771	1.29963	0.0640865	0.264449	0.0336887	0.0703475	0.00757937	0.0650039	0.00925298	0.0796854	0.0109249	0.743363	0.128799	0.328356	0.0026528
350	rs3723088	1	120.061	0.0707858	0.00980771	1.29963	0.0640865	0.264449	0.0336887	0.0703475	0.00757937	0.0650039	0.00925298	0.0796854	0.0109249	0.743363	0.128799	0.328356	0.0026528
351	rs3663708	1	120.113	0.053285	0.00760872	1.29865	0.0648377	0.237493	0.0313115	0.0707538	0.00772996	0.0106092	0.00161166	0.0761588	0.0106199	0.781605	0.107013	0.263914	0.00223786
352	rs31007558	1	120.148	0.053285	0.00760872	1.29865	0.0648377	0.237493	0.0313115	0.0707538	0.00772996	0.0106092	0.00161166	0.0761588	0.0106199	0.781605	0.107013	0.263914	0.00223786
353	rs30727085	1	120.894	0.053285	0.00760872	1.29865	0.0648377	0.237493	0.0313115	0.0707538	0.00772996	0.0106092	0.00161166	0.0761588	0.0106199	0.781605	0.107013	0.263914	0.00223786
354	rs48015801	1	121.148	0.00485245	-0.00073497	0.717019	0.04431	0.193776	0.0265276	0.0641553	-0.0071108	0.0511911	-0.00747863	0.21978	-0.027449	0.927692	0.032596	0.0866579	0.000853649
355	rs230640887	1	121.329	0.00485245	-0.00073497	0.717019	0.04431	0.193776	0.0265276	0.0641553	-0.0071108	0.0511911	-0.00747863	0.21978	-0.027449	0.927692	0.032596	0.0866579	0.000853649
356	rs237885247	1	121.353	0.00485245	-0.00073497	0.717019	0.04431	0.193776	0.0265276	0.0641553	-0.0071108	0.0511911	-0.00747863	0.21978	-0.027449	0.927692	0.032596	0.0866579	0.000853649
357	rs48962291	1	122.388	0.00485245	-0.00073497	0.717019	0.04431	0.193776	0.0265276	0.0641553	-0.0071108	0.0511911	-0.00747863	0.21978	-0.027449	0.927692	0.032596	0.0866579	0.000853649
358	rs213804272	1	123.991	0.00485245	-0.00073497	0.717019	0.04431	0.193776	0.0265276	0.0641553	-0.0071108	0.0511911	-0.00747863	0.21978	-0.027449	0.927692	0.032596	0.0866579	0.000853649
359	rs31189732	1	124.505	0.00485245	-0.00073497	0.717019	0.04431	0.193776	0.0265276	0.0641553	-0.0071108	0.0511911	-0.00747863	0.21978	-0.027449	0.927692	0.032596	0.0866579	0.000853649
360	rs47085630	1	124.541	0.00485245	-0.00073497	0.717019	0.04431	0.193776	0.0265276	0.0641553	-0.0071108	0.0511911	-0.00747863	0.21978	-0.027449	0.927692	0.032596	0.0866579	0.000853649
361	rs49565748	1	125.823	0.00485245	-0.00073497	0.717019	0.04431	0.193776	0.0265276	0.0641553	-0.0071108	0.0511911	-0.00747863	0.21978	-0.027449	0.927692	0.032596	0.0866579	0.000853649
362	rs30561273	1	126.079	0.00485245	-0.00073497	0.717019	0.04431	0.193776	0.0265276	0.0641553	-0.0071108	0.0511911	-0.00747863	0.21978	-0.027449	0.927692	0.032596	0.0866579	0.000853649
363	rs30785490	1	126.34	0.00485245	-0.00073497	0.717019	0.04431	0.193776	0.0265276	0.0641553	-0.0071108	0.0511911	-0.00747863	0.21978	-0.027449	0.927692	0.032596	0.0866579	0.000853649
364	rs32612920	1	126.657	0.059134	0.00835351	0.85303	0.0494766	0.548752	0.0596124	0.0279035	0.00316902	0.149155	0.0197268	0.175228	-0.022371	0.757208	0.120785	0.351208	0.00279652
365	rs31573665	1	126.673	0.059134	0.00835351	0.85303	0.0494766	0.548752	0.0596124	0.0279035	0.00316902	0.149155	0.0197268	0.175228	-0.022371	0.757208	0.120785	0.351208	0.00279652
366	rs47328362	1	126.722	0.059134	0.00835351	0.85303	0.0494766	0.548752	0.0596124	0.0279035	0.00316902	0.149155	0.0197268	0.175228	-0.022371	0.757208	0.120785	0.351208	0.00279652
367	rs32769332	1	126.729	0.204684	0.0255493	0.371635	0.0274027	0.293386	0.0370962	0.146967	-0.0149531	0.136641	-0.0181559	0.594124	-0.0588196	0.781428	0.107111	0.0856403	0.000842966
368	rs32013884	1	126.926	0.204684	0.0255493	0.371635	0.0274027	0.293386	0.0370962	0.146967	-0.0149531	0.136641	-0.0181559	0.594124	-0.0588196	0.781428	0.107111	0.0856403	0.000842966
369	rs50349808	1	127.037	0.204684	0.0255493	0.371635	0.0274027	0.293386	0.0370962	0.146967	-0.0149531	0.136641	-0.0181559	0.594124	-0.0588196	0.781428	0.107111	0.0856403	0.000842966
370	rs32811017	1	127.044	0.204684	0.0255493	0.371635	0.0274027	0.293386	0.0370962	0.146967	-0.0149531	0.136641	-0.0181559	0.594124	-0.0588196	0.781428	0.107111	0.0856403	0.000842966
371	rs31348531	1	127.049	0.204684	0.0255493	0.371635	0.0274027	0.293386	0.0370962	0.146967	-0.0149531	0.136641	-0.0181559	0.594124	-0.0588196	0.781428	0.107111	0.0856403	0.000842966
372	rs33889750	1	127.149	0.204684	0.0255493	0.371635	0.0274027	0.293386	0.0370962	0.146967	-0.0149531	0.136641	-0.0181559	0.594124	-0.0588196	0.781428	0.107111	0.0856403	0.000842966
373	rs47026905	1	127.154	0.204684	0.0255493	0.371635	0.0274027	0.293386	0.0370962	0.146967	-0.0149531	0.136641	-0.0181559	0.594124	-0.0588196	0.781428	0.107111	0.0856403	0.000842966
374	rs6263067	1	127.168	0.303916	0.0360759	0.433133	0.0314036	0.38074	0.0465383	0.0160011	-0.00188216	0.131106	-0.0177976	0.678797	-0.0658489	0.707107	0.150515	0.114233	0.00110823
375	rs32558546	1	128.543	0.303916	0.0360759	0.433133	0.0314036	0.38074	0.0465383	0.0160011	-0.00188216	0.131106	-0.0177976	0.678797	-0.0658489	0.707107	0.150515	0.114233	0.00110823
376	rs32101230	1	128.544	0.508173	0.0496341	0.795633	0.0451333	0.724162	0.0682339	0.0922397	0.00924573	0.193035	-0.0236947	0.275985	-0.0308407	0.451816	0.345039	0.410248	0.00311783
377	rs49892902	1	128.545	0.508173	0.0496341	0.795633	0.0451333	0.724162	0.0682339	0.0922397	0.00924573	0.193035	-0.0236947	0.275985	-0.0308407	0.451816	0.345039	0.410248	0.00311783
378	rs8256197	1	128.589	0.084563	0.0107957	0.613703	0.0369823	0.313114	0.0358091	0.0174423	0.00185271	0.18621	-0.0226815	0.571396	-0.0531962	0.767164	0.115112	0.397739	0.0030219
379	rs13459051	1	130.851	0.084563	0.0107957	0.613703	0.0369823	0.313114	0.0358091	0.0174423	0.00185271	0.18621	-0.0226815	0.571396	-0.0531962	0.767164	0.115112	0.397739	0.0030219
380	rs32335588	1	130.864	0.084563	0.0107957	0.613703	0.0369823	0.313114	0.0358091	0.0174423	0.00185271	0.18621	-0.0226815	0.571396	-0.0531962	0.767164	0.115112	0.397739	0.0030219
381	rs32112067	1	131.331	0.084563	0.0107957	0.613703	0.0369823	0.313114	0.0358091	0.0174423	0.00185271	0.18621	-0.0226815	0.571396	-0.0531962	0.767164	0.115112	0.397739	0.0030219
382	rs108035116	1	131.596	0.084563	0.0107957	0.613703	0.0369823	0.313114	0.0358091	0.0174423	0.00185271	0.18621	-0.0226815	0.571396	-0.0531962	0.767164	0.115112	0.397739	0.0030219
383	rs6250833	1	131.662	0.084563	0.0107957	0.613703	0.0369823	0.313114	0.0358091	0.0174423	0.00185271	0.18621	-0.0226815	0.571396	-0.0531962	0.767164	0.115112	0.397739	0.0030219
384	rs37505705	1	132.035	0.084563	0.0107957	0.613703	0.0369823	0.313114	0.0358091	0.0174423	0.00185271	0.18621	-0.0226815	0.571396	-0.0531962	0.767164	0.115112	0.397739	0.0030219
385	rs31762723	1	132.496	0.084563	0.0107957	0.613703	0.0369823	0.313114	0.0358091	0.0174423	0.00185271	0.18621	-0.0226815	0.571396	-0.0531962	0.767164	0.115112	0.397739	0.0030219
386	rs30763126	1	132.628	0.084563	0.0107957	0.613703	0.0369823	0.313114	0.0358091	0.0174423	0.00185271	0.18621	-0.0226815	0.571396	-0.0531962	0.767164	0.115112	0.397739	0.0030219
387	rs33494411	1	133.157	0.084563	0.0107957	0.613703	0.0369823	0.313114	0.0358091	0.0174423	0.00185271	0.18621	-0.0226815	0.571396	-0.0531962	0.767164	0.115112	0.397739	0.0030219
388	rs30766381	1	133.168	0.092634	0.0117916	0.634182	0.0379716	0.417219	0.0448601	0.0179654	0.00191611	0.152226	-0.0191713	0.438575	-0.0440067	0.779483	0.108193	0.615482	0.00421895
389	rs32452440	1	133.885	0.092634	0.0117916	0.634182	0.0379716	0.417219	0.0448601	0.0179654	0.00191611	0.152226	-0.0191713	0.438575	-0.0440067	0.779483	0.108193	0.615482	0.00421895
390	rs37131139	1	133.976	0.092634	0.0117916	0.634182	0.0379716	0.417219	0.0448601	0.0179654	0.00191611	0.152226	-0.0191713	0.438575	-0.0440067	0.779483	0.108193	0.615482	0.00421895
391	rs13476119	1	134.211	0.092634	0.0117916	0.634182	0.0379716	0.417219	0.0448601	0.0179654	0.00191611	0.152226	-0.0191713	0.438575	-0.0440067	0.779483	0.108193	0.615482	0.00421895
392	rs49289788	1	135.17	0.100352	-0.0122404	0.602636	0.0352948	0.16175	0.0199396	0.0257102	0.00262193	0.229158	-0.026465	0.391392	-0.0389404	0.86035	0.0653246	0.722579	0.00465009
393	rs36548506	1	135.484	0.100352	-0.0122404	0.602636	0.0352948	0.16175	0.0199396	0.0257102	0.00262193	0.229158	-0.026465	0.391392	-0.0389404	0.86035	0.0653246	0.722579	0.00465009
394	rs37895110	1	135.563	0.100352	-0.0122404	0.602636	0.0352948	0.16175	0.0199396	0.0257102	0.00262193	0.229158	-0.026465	0.391392	-0.0389404	0.86035	0.0653246	0.722579	0.00465009
395	rs3691222	1	136.318	0.100352	-0.0122404	0.602636	0.0352948	0.16175	0.0199396	0.0257102	0.00262193	0.229158	-0.026465	0.391392	-0.0389404	0.86035	0.0653246	0.722579	0.00465009
396	rs33589350	1	136.538	0.100352	-0.0122404	0.602636	0.0352948	0.16175	0.0199396	0.0257102	0.00262193	0.229158	-0.026465	0.391392	-0.0389404	0.86035	0.0653246	0.722579	0.00465009
397	rs33586240	1	136.554	0.193777	-0.0216105	0.525381	0.0315272	0.319898	0.0347988	0.076435	0.00731063	0.238479	-0.0271395	0.408425	-0.0397923	0.775991	0.110143	0.589829	0.00399369
398	rs6406033	1	136.566	0.177639	-0.0199827	0.471099	0.0289009	0.28851	0.0318603	0.0237716	0.00238861	0.298478	-0.0325416	0.235566	-0.0254707	0.865117	0.0629249	0.573158	0.00390509
399	rs46445754	1	137.433	0.177639	-0.0199827	0.471099	0.0289009	0.28851	0.0318603	0.0237716	0.00238861	0.298478	-0.0325416	0.235566	-0.0254707	0.865117	0.0629249	0.573158	0.00390509
400	rs31534627	1	138.574	0.177639	-0.0199827	0.471099	0.0289009	0.28851	0.0318603	0.0237716	0.00238861	0.298478	-0.0325416	0.235566	-0.0254707	0.865117	0.0629249	0.573158	0.00390509
401	rs215571652	1	138.607	0.177639	-0.0199827	0.471099	0.0289009	0.28851	0.0318603	0.0237716	0.00238861	0.298478	-0.0325416	0.235566	-0.0254707	0.865117	0.0629249	0.573158	0.00390509
402	rs13476137	1	139.232	0.177639	-0.0199827	0.471099	0.0289009	0.28851	0.0318603	0.0237716	0.00238861	0.298478	-0.0325416	0.235566	-0.0254707	0.865117	0.0629249	0.573158	0.00390509
403	rs13476138	1	139.521	0.281521	-0.0319983	0.240947	0.0185405	0.0738387	-0.0106137	0.143709	-0.0140734	0.226283	-0.0275031	0.564422	-0.0544849	0.854343	0.0683677	0.343529	0.00275636
404	rs49147137	1	139.602	0.281521	-0.0319983	0.240947	0.0185405	0.0738387	-0.0106137	0.143709	-0.0140734	0.226283	-0.0275031	0.564422	-0.0544849	0.854343	0.0683677	0.343529	0.00275636
405	rs107630249	1	139.807	0.357654	-0.0376552	0.273624	0.0201941	0.027223	-0.00398998	0.0186434	-0.00200143	0.278933	-0.0320702	0.472246	-0.0465172	0.884216	0.0534417	0.514019	0.00374291
406	rs3682831	1	139.96	0.357654	-0.0376552	0.273624	0.0201941	0.027223	-0.00398998	0.0186434	-0.00200143	0.278933	-0.0320702	0.472246	-0.0465172	0.884216	0.0534417	0.514019	0.00374291
407	rs13476148	1	142.966	0.483188	-0.0480602	0.598512	0.0374273	0.115433	0.0157523	0.187244	0.0174674	0.184549	-0.0228554	0.498259	-0.049056	0.658013	0.181766	0.383124	0.00300684
408	rs31066093	1	145.202	0.440791	-0.0441039	0.63128	0.0383575	0.238012	0.0289797	0.0660044	0.00672343	0.129539	-0.0165527	0.33874	-0.0359109	0.745465	0.127573	0.376724	0.00294071
409	rs31063456	1	145.377	0.0416925	0.00593897	0.437275	0.030846	0.571738	0.0610156	0.0384692	0.00429137	0.148864	-0.019561	0.168489	-0.0214088	0.890139	0.0505422	0.365906	0.00292983
410	rs31055515	1	145.394	0.0416925	0.00593897	0.437275	0.030846	0.571738	0.0610156	0.0384692	0.00429137	0.148864	-0.019561	0.168489	-0.0214088	0.890139	0.0505422	0.365906	0.00292983
411	rs32687429	1	146.269	0.0590035	0.00818398	0.589979	0.0382317	0.713931	0.0707181	0.0929514	0.00973444	0.174931	-0.0223027	0.0816034	-0.0110797	0.793983	0.100189	0.464357	0.00349824
412	rs32586240	1	146.663	0.0590035	0.00818398	0.589979	0.0382317	0.713931	0.0707181	0.0929514	0.00973444	0.174931	-0.0223027	0.0816034	-0.0110797	0.793983	0.100189	0.464357	0.00349824
413	rs31006935	1	146.745	0.121645	0.0156298	1.07099	0.0567064	0.764038	0.0730188	0.254226	0.0230304	0.0985687	-0.0132725	0.200148	0.0242782	0.481864	0.317075	0.729891	0.0048261
414	rs31190083	1	146.783	0.121645	0.0156298	1.07099	0.0567064	0.764038	0.0730188	0.254226	0.0230304	0.0985687	-0.0132725	0.200148	0.0242782	0.481864	0.317075	0.729891	0.0048261
415	rs13476163	1	146.871	0.121645	0.0156298	1.07099	0.0567064	0.764038	0.0730188	0.254226	0.0230304	0.0985687	-0.0132725	0.200148	0.0242782	0.481864	0.317075	0.729891	0.0048261
416	rs30991744	1	146.963	0.121645	0.0156298	1.07099	0.0567064	0.764038	0.0730188	0.254226	0.0230304	0.0985687	-0.0132725	0.200148	0.0242782	0.481864	0.317075	0.729891	0.0048261
417	rs30769516	1	147.055	0.319832	0.0349256	1.25017	0.0619149	1.20577	0.0972139	0.547247	0.0412489	0.0566374	-0.00787724	0.100647	0.0130569	0.189985	0.721281	0.594794	0.00414295
418	rs3711440	1	147.249	0.319832	0.0349256	1.25017	0.0619149	1.20577	0.0972139	0.547247	0.0412489	0.0566374	-0.00787724	0.100647	0.0130569	0.189985	0.721281	0.594794	0.00414295
419	rs6411476	1	148.98	0.319832	0.0349256	1.25017	0.0619149	1.20577	0.0972139	0.547247	0.0412489	0.0566374	-0.00787724	0.100647	0.0130569	0.189985	0.721281	0.594794	0.00414295
420	rs3680050	1	149.798	0.319832	0.0349256	1.25017	0.0619149	1.20577	0.0972139	0.547247	0.0412489	0.0566374	-0.00787724	0.100647	0.0130569	0.189985	0.721281	0.594794	0.00414295
421	rs31640585	1	150.054	0.319832	0.0349256	1.25017	0.0619149	1.20577	0.0972139	0.547247	0.0412489	0.0566374	-0.00787724	0.100647	0.0130569	0.189985	0.721281	0.594794	0.00414295
422	rs13476175	1	150.06	0.9169	0.0769973	1.52476	0.0714317	1.98595	0.134093	0.707526	0.0505785	0.0607962	-0.0085385	0.356999	0.0391252	0.0123324	1.90895	0.615001	0.00428842
423	rs13476177	1	150.644	0.9169	0.0769973	1.52476	0.0714317	1.98595	0.134093	0.707526	0.0505785	0.0607962	-0.0085385	0.356999	0.0391252	0.0123324	1.90895	0.615001	0.00428842
424	rs31897662	1	151.271	0.9169	0.0769973	1.52476	0.0714317	1.98595	0.134093	0.707526	0.0505785	0.0607962	-0.0085385	0.356999	0.0391252	0.0123324	1.90895	0.615001	0.00428842
425	rs31230953	1	151.898	0.9169	0.0769973	1.52476	0.0714317	1.98595	0.134093	0.707526	0.0505785	0.0607962	-0.0085385	0.356999	0.0391252	0.0123324	1.90895	0.615001	0.00428842
426	rs31226073	1	151.921	2.11238	0.131444	2.33745	0.0944725	2.7616	0.164735	0.967507	0.0647062	0.197811	0.0257525	0.54005	0.0555541	4.78213e-05	4.32038	0.520581	0.00395895
427	rs31206241	1	152.415	2.11238	0.131444	2.33745	0.0944725	2.7616	0.164735	0.967507	0.0647062	0.197811	0.0257525	0.54005	0.0555541	4.78213e-05	4.32038	0.520581	0.00395895
428	rs31201062	1	152.435	2.43217	0.132056	2.33467	0.0885751	2.96232	0.15871	1.07299	0.06439	0.167903	0.0210381	0.698056	0.0624195	1.24341e-05	4.90539	0.764434	0.00494867
429	rs6267646	1	152.549	2.43217	0.132056	2.33467	0.0885751	2.96232	0.15871	1.07299	0.06439	0.167903	0.0210381	0.698056	0.0624195	1.24341e-05	4.90539	0.764434	0.00494867
430	rs31180473	1	152.757	2.43217	0.132056	2.33467	0.0885751	2.96232	0.15871	1.07299	0.06439	0.167903	0.0210381	0.698056	0.0624195	1.24341e-05	4.90539	0.764434	0.00494867
431	rs32707440	1	152.914	2.15797	0.123957	2.08356	0.0826885	2.02216	0.130001	0.859346	0.0555587	0.0277635	-0.0039267	0.635764	0.0583534	0.000341409	3.46672	0.386544	0.00298134
432	rs31173184	1	153.016	2.15797	0.123957	2.08356	0.0826885	2.02216	0.130001	0.859346	0.0555587	0.0277635	-0.0039267	0.635764	0.0583534	0.000341409	3.46672	0.386544	0.00298134
433	rs13476184	1	153.185	2.15797	0.123957	2.08356	0.0826885	2.02216	0.130001	0.859346	0.0555587	0.0277635	-0.0039267	0.635764	0.0583534	0.000341409	3.46672	0.386544	0.00298134
434	rs231234050	1	153.37	2.15797	0.123957	2.08356	0.0826885	2.02216	0.130001	0.859346	0.0555587	0.0277635	-0.0039267	0.635764	0.0583534	0.000341409	3.46672	0.386544	0.00298134
435	rs47680477	1	153.423	2.15797	0.123957	2.08356	0.0826885	2.02216	0.130001	0.859346	0.0555587	0.0277635	-0.0039267	0.635764	0.0583534	0.000341409	3.46672	0.386544	0.00298134
436	rs37068894	1	153.933	2.15797	0.123957	2.08356	0.0826885	2.02216	0.130001	0.859346	0.0555587	0.0277635	-0.0039267	0.635764	0.0583534	0.000341409	3.46672	0.386544	0.00298134
437	rs32571301	1	153.97	2.69409	0.137716	2.03435	0.0803895	2.23124	0.134074	0.739112	0.0489016	0.133697	-0.0168433	0.64527	0.0576006	0.000103588	3.98469	0.342338	0.00269802
438	rs262053553	1	154.144	2.69409	0.137716	2.03435	0.0803895	2.23124	0.134074	0.739112	0.0489016	0.133697	-0.0168433	0.64527	0.0576006	0.000103588	3.98469	0.342338	0.00269802
439	rs13476187	1	154.205	2.69409	0.137716	2.03435	0.0803895	2.23124	0.134074	0.739112	0.0489016	0.133697	-0.0168433	0.64527	0.0576006	0.000103588	3.98469	0.342338	0.00269802
440	rs32380880	1	154.528	2.69409	0.137716	2.03435	0.0803895	2.23124	0.134074	0.739112	0.0489016	0.133697	-0.0168433	0.64527	0.0576006	0.000103588	3.98469	0.342338	0.00269802
441	rs220024233	1	154.533	2.86899	0.143247	1.73292	0.0731363	1.99759	0.126027	0.560571	0.0402307	0.177048	-0.0216173	0.659127	0.0587358	0.000238563	3.6224	0.404925	0.00308715
442	rs32238353	1	154.54	2.86899	0.143247	1.73292	0.0731363	1.99759	0.126027	0.560571	0.0402307	0.177048	-0.0216173	0.659127	0.0587358	0.000238563	3.6224	0.404925	0.00308715
443	rs30592448	1	154.583	2.86899	0.143247	1.73292	0.0731363	1.99759	0.126027	0.560571	0.0402307	0.177048	-0.0216173	0.659127	0.0587358	0.000238563	3.6224	0.404925	0.00308715
444	rs6181202	1	154.609	2.9608	0.143848	1.41821	0.0636802	1.72357	0.113624	0.392892	0.0303393	0.219866	-0.0257408	0.657794	0.0579187	0.000685766	3.16382	0.464785	0.00340317
445	rs235136764	1	154.872	2.9608	0.143848	1.41821	0.0636802	1.72357	0.113624	0.392892	0.0303393	0.219866	-0.0257408	0.657794	0.0579187	0.000685766	3.16382	0.464785	0.00340317
446	rs31598960	1	155.096	2.61302	0.132663	1.30419	0.0600373	2.11247	0.128714	0.474944	0.0349918	0.230289	-0.0266362	0.625607	0.0555771	0.000700367	3.15467	0.35534	0.00275202
447	rs33692139	1	155.105	2.61302	0.132663	1.30419	0.0600373	2.11247	0.128714	0.474944	0.0349918	0.230289	-0.0266362	0.625607	0.0555771	0.000700367	3.15467	0.35534	0.00275202
448	rs31404871	1	155.701	2.1166	0.121322	1.14791	0.0566173	1.57496	0.111502	0.215815	0.019166	0.287585	-0.0325087	0.809378	0.0684112	0.004945	2.30583	0.466562	0.00343123
449	rs30497461	1	155.705	2.1166	0.121322	1.14791	0.0566173	1.57496	0.111502	0.215815	0.019166	0.287585	-0.0325087	0.809378	0.0684112	0.004945	2.30583	0.466562	0.00343123
450	rs32737955	1	155.81	2.1166	0.121322	1.14791	0.0566173	1.57496	0.111502	0.215815	0.019166	0.287585	-0.0325087	0.809378	0.0684112	0.004945	2.30583	0.466562	0.00343123
451	rs48733621	1	156.406	2.1166	0.121322	1.14791	0.0566173	1.57496	0.111502	0.215815	0.019166	0.287585	-0.0325087	0.809378	0.0684112	0.004945	2.30583	0.466562	0.00343123
452	rs31266917	1	156.849	2.1166	0.121322	1.14791	0.0566173	1.57496	0.111502	0.215815	0.019166	0.287585	-0.0325087	0.809378	0.0684112	0.004945	2.30583	0.466562	0.00343123
453	rs30694289	1	156.951	2.1166	0.121322	1.14791	0.0566173	1.57496	0.111502	0.215815	0.019166	0.287585	-0.0325087	0.809378	0.0684112	0.004945	2.30583	0.466562	0.00343123
454	rs3696645	1	157.943	2.1166	0.121322	1.14791	0.0566173	1.57496	0.111502	0.215815	0.019166	0.287585	-0.0325087	0.809378	0.0684112	0.004945	2.30583	0.466562	0.00343123
455	rs30471675	1	157.989	2.1166	0.121322	1.14791	0.0566173	1.57496	0.111502	0.215815	0.019166	0.287585	-0.0325087	0.809378	0.0684112	0.004945	2.30583	0.466562	0.00343123
456	rs3722993	1	158.218	2.1166	0.121322	1.14791	0.0566173	1.57496	0.111502	0.215815	0.019166	0.287585	-0.0325087	0.809378	0.0684112	0.004945	2.30583	0.466562	0.00343123
457	rs49525822	1	158.228	1.60179	0.10337	1.14405	0.0565581	1.35128	0.10241	0.274277	0.0236326	0.156111	-0.019588	0.789205	0.0679645	0.0174644	1.75785	0.514853	0.00370238
458	rs6209248	1	158.373	1.60179	0.10337	1.14405	0.0565581	1.35128	0.10241	0.274277	0.0236326	0.156111	-0.019588	0.789205	0.0679645	0.0174644	1.75785	0.514853	0.00370238
459	rs33742737	1	158.373	1.72893	0.103807	1.16374	0.0552024	1.41189	0.101297	0.433477	0.0326791	0.14336	-0.0176245	0.688629	0.0596944	0.0120224	1.92001	0.535862	0.00370678
460	rs33740307	1	158.381	1.5333	0.0979939	0.570109	0.0344382	0.9653	0.0804189	0.172685	0.015629	0.583401	-0.0550344	0.445935	0.0438582	0.0736444	1.13286	0.169981	0.00147726
461	rs33739489	1	158.381	1.5333	0.0979939	0.570109	0.0344382	0.9653	0.0804189	0.172685	0.015629	0.583401	-0.0550344	0.445935	0.0438582	0.0736444	1.13286	0.169981	0.00147726
462	rs31315479	1	159.434	1.5333	0.0979939	0.570109	0.0344382	0.9653	0.0804189	0.172685	0.015629	0.583401	-0.0550344	0.445935	0.0438582	0.0736444	1.13286	0.169981	0.00147726
463	rs31303858	1	159.479	1.5333	0.0979939	0.570109	0.0344382	0.9653	0.0804189	0.172685	0.015629	0.583401	-0.0550344	0.445935	0.0438582	0.0736444	1.13286	0.169981	0.00147726
464	rs47852191	1	160.261	1.5333	0.0979939	0.570109	0.0344382	0.9653	0.0804189	0.172685	0.015629	0.583401	-0.0550344	0.445935	0.0438582	0.0736444	1.13286	0.169981	0.00147726
465	rs3693161	1	160.285	1.25559	0.088829	1.17813	0.0566344	1.43021	0.104576	0.413414	0.0325013	0.190331	-0.0235757	0.985364	0.0789741	0.0143003	1.84465	0.476108	0.00349847
466	rs31694619	1	161.735	1.25559	0.088829	1.17813	0.0566344	1.43021	0.104576	0.413414	0.0325013	0.190331	-0.0235757	0.985364	0.0789741	0.0143003	1.84465	0.476108	0.00349847
467	rs6255075	1	161.982	1.42363	0.097255	1.34648	0.0624128	1.33367	0.102294	0.223296	0.0203729	0.00729197	0.00108789	0.778647	0.068915	0.0234301	1.63023	0.381147	0.00300914
468	rs31200652	1	162.059	1.87496	0.111877	1.52425	0.0661078	1.89321	0.123145	0.503051	0.037765	0.043743	0.00612711	0.592091	0.055437	0.00318746	2.49656	0.272279	0.00225396
469	rs3685643	1	162.25	1.87496	0.111877	1.52425	0.0661078	1.89321	0.123145	0.503051	0.037765	0.043743	0.00612711	0.592091	0.055437	0.00318746	2.49656	0.272279	0.00225396
470	rs4222751	1	162.599	1.87496	0.111877	1.52425	0.0661078	1.89321	0.123145	0.503051	0.037765	0.043743	0.00612711	0.592091	0.055437	0.00318746	2.49656	0.272279	0.00225396
471	rs46133782	1	162.965	1.87496	0.111877	1.52425	0.0661078	1.89321	0.123145	0.503051	0.037765	0.043743	0.00612711	0.592091	0.055437	0.00318746	2.49656	0.272279	0.00225396
472	rs49476641	1	163.094	1.87496	0.111877	1.52425	0.0661078	1.89321	0.123145	0.503051	0.037765	0.043743	0.00612711	0.592091	0.055437	0.00318746	2.49656	0.272279	0.00225396
473	rs6341208	1	163.133	1.87496	0.111877	1.52425	0.0661078	1.89321	0.123145	0.503051	0.037765	0.043743	0.00612711	0.592091	0.055437	0.00318746	2.49656	0.272279	0.00225396
474	rs32045036	1	163.312	1.96773	0.109568	1.42391	0.0611254	1.72987	0.11186	0.228368	0.0194349	0.262006	0.0293166	0.555315	0.0506949	0.00483106	2.31596	0.136473	0.00122253
475	rs31112062	1	163.339	2.94257	0.139554	1.40933	0.0632824	2.00893	0.12725	0.446847	0.034457	0.738006	0.0656063	0.710165	0.0628755	0.00015243	3.81693	0.0775716	0.000747323
476	rs47368358	1	164.024	2.94257	0.139554	1.40933	0.0632824	2.00893	0.12725	0.446847	0.034457	0.738006	0.0656063	0.710165	0.0628755	0.00015243	3.81693	0.0775716	0.000747323
477	rs32756586	1	164.065	2.94257	0.139554	1.40933	0.0632824	2.00893	0.12725	0.446847	0.034457	0.738006	0.0656063	0.710165	0.0628755	0.00015243	3.81693	0.0775716	0.000747323
478	rs45839990	1	164.178	2.94257	0.139554	1.40933	0.0632824	2.00893	0.12725	0.446847	0.034457	0.738006	0.0656063	0.710165	0.0628755	0.00015243	3.81693	0.0775716	0.000747323
479	rs252083450	1	164.43	2.94257	0.139554	1.40933	0.0632824	2.00893	0.12725	0.446847	0.034457	0.738006	0.0656063	0.710165	0.0628755	0.00015243	3.81693	0.0775716	0.000747323
480	rs32249444	1	164.441	2.94257	0.139554	1.40933	0.0632824	2.00893	0.12725	0.446847	0.034457	0.738006	0.0656063	0.710165	0.0628755	0.00015243	3.81693	0.0775716	0.000747323
481	rs51211918	1	164.476	2.94257	0.139554	1.40933	0.0632824	2.00893	0.12725	0.446847	0.034457	0.738006	0.0656063	0.710165	0.0628755	0.00015243	3.81693	0.0775716	0.000747323
482	rs33755574	1	164.847	2.94257	0.139554	1.40933	0.0632824	2.00893	0.12725	0.446847	0.034457	0.738006	0.0656063	0.710165	0.0628755	0.00015243	3.81693	0.0775716	0.000747323
483	rs31837891	1	164.859	2.94257	0.139554	1.40933	0.0632824	2.00893	0.12725	0.446847	0.034457	0.738006	0.0656063	0.710165	0.0628755	0.00015243	3.81693	0.0775716	0.000747323
484	rs32390142	1	164.901	2.94257	0.139554	1.40933	0.0632824	2.00893	0.12725	0.446847	0.034457	0.738006	0.0656063	0.710165	0.0628755	0.00015243	3.81693	0.0775716	0.000747323
485	rs252005115	1	164.902	2.94257	0.139554	1.40933	0.0632824	2.00893	0.12725	0.446847	0.034457	0.738006	0.0656063	0.710165	0.0628755	0.00015243	3.81693	0.0775716	0.000747323
486	rs30710796	1	166.299	2.94257	0.139554	1.40933	0.0632824	2.00893	0.12725	0.446847	0.034457	0.738006	0.0656063	0.710165	0.0628755	0.00015243	3.81693	0.0775716	0.000747323
487	rs31428291	1	166.393	2.48388	0.124107	1.20171	0.0552768	2.02693	0.122603	0.652808	0.0433663	0.369595	0.0381987	0.874549	0.0694489	0.000460995	3.3363	0.142294	0.00124741
488	rs50916411	1	166.417	2.48388	0.124107	1.20171	0.0552768	2.02693	0.122603	0.652808	0.0433663	0.369595	0.0381987	0.874549	0.0694489	0.000460995	3.3363	0.142294	0.00124741
489	rs31286471	1	166.711	2.48388	0.124107	1.20171	0.0552768	2.02693	0.122603	0.652808	0.0433663	0.369595	0.0381987	0.874549	0.0694489	0.000460995	3.3363	0.142294	0.00124741
490	rs38443544	1	166.713	2.48388	0.124107	1.20171	0.0552768	2.02693	0.122603	0.652808	0.0433663	0.369595	0.0381987	0.874549	0.0694489	0.000460995	3.3363	0.142294	0.00124741
491	rs36664522	1	166.741	2.48388	0.124107	1.20171	0.0552768	2.02693	0.122603	0.652808	0.0433663	0.369595	0.0381987	0.874549	0.0694489	0.000460995	3.3363	0.142294	0.00124741
492	rs37545577	1	166.799	2.48388	0.124107	1.20171	0.0552768	2.02693	0.122603	0.652808	0.0433663	0.369595	0.0381987	0.874549	0.0694489	0.000460995	3.3363	0.142294	0.00124741
493	rs38346127	1	166.909	2.48388	0.124107	1.20171	0.0552768	2.02693	0.122603	0.652808	0.0433663	0.369595	0.0381987	0.874549	0.0694489	0.000460995	3.3363	0.142294	0.00124741
494	rs13476221	1	166.983	2.51418	0.129054	0.713002	0.0408737	1.89984	0.123031	0.345272	0.0281355	0.212967	0.0254227	0.616188	0.056562	0.00391412	2.40737	0.174931	0.00153338
495	rs48965551	1	167.195	3.15203	0.133043	0.575913	0.0322994	1.76889	0.107229	0.237398	0.0188597	0.119877	-0.0143231	0.453169	0.0410126	0.00387838	2.41135	0.18807	0.00154859
496	rs4222799	1	167.223	3.15203	0.133043	0.575913	0.0322994	1.76889	0.107229	0.237398	0.0188597	0.119877	-0.0143231	0.453169	0.0410126	0.00387838	2.41135	0.18807	0.00154859
497	rs30563210	1	167.331	2.39943	0.115741	0.346276	0.0216325	1.47902	0.0948869	0.188112	0.0151825	0.168547	-0.0190206	0.747675	0.0576118	0.0171529	1.76566	0.771819	0.0045573
498	rs32238450	1	167.709	2.39943	0.115741	0.346276	0.0216325	1.47902	0.0948869	0.188112	0.0151825	0.168547	-0.0190206	0.747675	0.0576118	0.0171529	1.76566	0.771819	0.0045573
499	rs48267649	1	167.823	2.39943	0.115741	0.346276	0.0216325	1.47902	0.0948869	0.188112	0.0151825	0.168547	-0.0190206	0.747675	0.0576118	0.0171529	1.76566	0.771819	0.0045573
500	rs50209411	1	168.144	2.39943	0.115741	0.346276	0.0216325	1.47902	0.0948869	0.188112	0.0151825	0.168547	-0.0190206	0.747675	0.0576118	0.0171529	1.76566	0.771819	0.0045573
501	rs48742671	1	170.535	1.59912	0.103352	0.493411	0.0314613	1.67647	0.113417	0.162205	0.0149483	0.0248918	0.00349881	0.813075	0.0678033	0.037938	1.42093	1.68343	0.00770978
502	Affy_10351506	1	170.949	1.41824	0.0990212	0.453546	0.0302204	1.34585	0.101761	0.388442	0.0312019	0.361135	0.039812	0.909903	0.0746409	0.0326768	1.48576	1.46057	0.00735363
503	rs48042782	1	171.041	0.395449	0.0434987	0.178777	0.0150844	0.653899	0.0673475	0.551905	0.043402	0.0942673	-0.0133383	0.36034	0.0405887	0.590458	0.228811	0.923154	0.00579012
504	rs8242766	1	171.052	0.395449	0.0434987	0.178777	0.0150844	0.653899	0.0673475	0.551905	0.043402	0.0942673	-0.0133383	0.36034	0.0405887	0.590458	0.228811	0.923154	0.00579012
505	rs31555580	1	171.172	0.395449	0.0434987	0.178777	0.0150844	0.653899	0.0673475	0.551905	0.043402	0.0942673	-0.0133383	0.36034	0.0405887	0.590458	0.228811	0.923154	0.00579012
506	rs31557390	1	171.193	0.460879	0.0482642	0.202215	0.01656	0.5158	0.0556039	0.491767	0.0392011	0.0882621	-0.012454	0.36674	0.0406273	0.634462	0.197595	0.996794	0.00607937
507	rs3722740	1	171.749	0.378314	0.0437187	0.172334	0.0151898	0.459954	0.0538935	0.317054	0.0294605	0.100234	-0.0146307	0.448673	0.0499117	0.733175	0.134792	0.99519	0.00629193
508	rs3705274	1	172.174	0.460879	0.0482642	0.202215	0.01656	0.5158	0.0556039	0.491767	0.0392011	0.0882621	-0.012454	0.36674	0.0406273	0.634462	0.197595	0.996794	0.00607937
509	rs31218323	1	172.175	0.460879	0.0482642	0.202215	0.01656	0.5158	0.0556039	0.491767	0.0392011	0.0882621	-0.012454	0.36674	0.0406273	0.634462	0.197595	0.996794	0.00607937
510	rs47959443	1	172.211	0.460879	0.0482642	0.202215	0.01656	0.5158	0.0556039	0.491767	0.0392011	0.0882621	-0.012454	0.36674	0.0406273	0.634462	0.197595	0.996794	0.00607937
511	rs31572828	1	172.235	0.357297	0.039863	0.119818	0.01053	0.177827	0.0239002	0.341033	0.0297577	0.345833	-0.0403513	0.319652	0.0366317	0.811752	0.0905767	0.549907	0.00404983
512	rs31567752	1	172.332	0.357297	0.039863	0.119818	0.01053	0.177827	0.0239002	0.341033	0.0297577	0.345833	-0.0403513	0.319652	0.0366317	0.811752	0.0905767	0.549907	0.00404983
513	rs31561281	1	172.445	0.357297	0.039863	0.119818	0.01053	0.177827	0.0239002	0.341033	0.0297577	0.345833	-0.0403513	0.319652	0.0366317	0.811752	0.0905767	0.549907	0.00404983
514	rs31559428	1	172.578	0.743319	0.0700817	0.28695	0.0226918	0.428637	0.0498702	0.481543	0.0396315	0.187958	-0.0249902	0.443774	0.0483348	0.45818	0.338964	0.29931	0.00259324
515	rs49959361	1	172.707	0.743319	0.0700817	0.28695	0.0226918	0.428637	0.0498702	0.481543	0.0396315	0.187958	-0.0249902	0.443774	0.0483348	0.45818	0.338964	0.29931	0.00259324
516	rs51348059	1	172.833	0.357297	0.039863	0.119818	0.01053	0.177827	0.0239002	0.341033	0.0297577	0.345833	-0.0403513	0.319652	0.0366317	0.811752	0.0905767	0.549907	0.00404983
517	rs259230007	1	172.911	0.357297	0.039863	0.119818	0.01053	0.177827	0.0239002	0.341033	0.0297577	0.345833	-0.0403513	0.319652	0.0366317	0.811752	0.0905767	0.549907	0.00404983
518	rs31612847	1	173.339	0.357297	0.039863	0.119818	0.01053	0.177827	0.0239002	0.341033	0.0297577	0.345833	-0.0403513	0.319652	0.0366317	0.811752	0.0905767	0.549907	0.00404983
519	rs31608155	1	173.373	0.357297	0.039863	0.119818	0.01053	0.177827	0.0239002	0.341033	0.0297577	0.345833	-0.0403513	0.319652	0.0366317	0.811752	0.0905767	0.549907	0.00404983
520	rs31405208	1	173.42	0.357297	0.039863	0.119818	0.01053	0.177827	0.0239002	0.341033	0.0297577	0.345833	-0.0403513	0.319652	0.0366317	0.811752	0.0905767	0.549907	0.00404983
521	rs46128598	1	173.634	0.203787	0.0246967	0.00376138	0.000363894	0.0283434	0.00428108	0.0285324	0.00313673	0.858343	-0.0771692	0.284198	0.0326684	0.890021	0.0505996	1.20794	0.00679077
522	rs31590468	1	173.643	0.203787	0.0246967	0.00376138	0.000363894	0.0283434	0.00428108	0.0285324	0.00313673	0.858343	-0.0771692	0.284198	0.0326684	0.890021	0.0505996	1.20794	0.00679077
523	rs31587587	1	173.646	0.203787	0.0246967	0.00376138	0.000363894	0.0283434	0.00428108	0.0285324	0.00313673	0.858343	-0.0771692	0.284198	0.0326684	0.890021	0.0505996	1.20794	0.00679077
524	rs31584856	1	173.679	0.203787	0.0246967	0.00376138	0.000363894	0.0283434	0.00428108	0.0285324	0.00313673	0.858343	-0.0771692	0.284198	0.0326684	0.890021	0.0505996	1.20794	0.00679077
525	rs3682996	1	173.747	0.203787	0.0246967	0.00376138	0.000363894	0.0283434	0.00428108	0.0285324	0.00313673	0.858343	-0.0771692	0.284198	0.0326684	0.890021	0.0505996	1.20794	0.00679077
526	rs3669108	1	174.541	0.203787	0.0246967	0.00376138	0.000363894	0.0283434	0.00428108	0.0285324	0.00313673	0.858343	-0.0771692	0.284198	0.0326684	0.890021	0.0505996	1.20794	0.00679077
527	rs6375522	1	174.679	0.203787	0.0246967	0.00376138	0.000363894	0.0283434	0.00428108	0.0285324	0.00313673	0.858343	-0.0771692	0.284198	0.0326684	0.890021	0.0505996	1.20794	0.00679077
528	rs4136041	1	175.437	0.203787	0.0246967	0.00376138	0.000363894	0.0283434	0.00428108	0.0285324	0.00313673	0.858343	-0.0771692	0.284198	0.0326684	0.890021	0.0505996	1.20794	0.00679077
529	rs31329176	1	175.615	0.203787	0.0246967	0.00376138	0.000363894	0.0283434	0.00428108	0.0285324	0.00313673	0.858343	-0.0771692	0.284198	0.0326684	0.890021	0.0505996	1.20794	0.00679077
530	rs31420065	1	175.769	0.203787	0.0246967	0.00376138	0.000363894	0.0283434	0.00428108	0.0285324	0.00313673	0.858343	-0.0771692	0.284198	0.0326684	0.890021	0.0505996	1.20794	0.00679077
531	rs32559774	1	176.205	0.203787	0.0246967	0.00376138	0.000363894	0.0283434	0.00428108	0.0285324	0.00313673	0.858343	-0.0771692	0.284198	0.0326684	0.890021	0.0505996	1.20794	0.00679077
532	Affy_10352113	1	178.015	0.916119	0.0777929	0.290893	0.0220675	0.460739	0.0506984	0.201804	0.0190781	0.414323	-0.0457362	0.509844	0.0516593	0.378887	0.42149	0.509222	0.00376497
533	Affy_4563273	1	178.157	0.932153	0.0777313	0.413126	0.0287874	0.627397	0.0627911	0.227805	0.020889	0.331069	-0.0382368	0.615666	0.0587432	0.270312	0.568134	0.499779	0.0037078
534	rs30712622	1	179.863	0.335871	0.0356509	0.158204	0.0126326	0.156414	0.0200576	0.230093	0.0202743	0.637401	-0.060936	0.677981	0.0606645	0.606067	0.217479	0.512528	0.0036982
535	rs31282255	1	179.922	0.335871	0.0356509	0.158204	0.0126326	0.156414	0.0200576	0.230093	0.0202743	0.637401	-0.060936	0.677981	0.0606645	0.606067	0.217479	0.512528	0.0036982
536	rs30991108	1	180.137	0.335871	0.0356509	0.158204	0.0126326	0.156414	0.0200576	0.230093	0.0202743	0.637401	-0.060936	0.677981	0.0606645	0.606067	0.217479	0.512528	0.0036982
537	rs32374329	1	180.184	0.335871	0.0356509	0.158204	0.0126326	0.156414	0.0200576	0.230093	0.0202743	0.637401	-0.060936	0.677981	0.0606645	0.606067	0.217479	0.512528	0.0036982
538	rs51978750	1	180.24	0.335871	0.0356509	0.158204	0.0126326	0.156414	0.0200576	0.230093	0.0202743	0.637401	-0.060936	0.677981	0.0606645	0.606067	0.217479	0.512528	0.0036982
539	rs49397948	1	180.241	0.335871	0.0356509	0.158204	0.0126326	0.156414	0.0200576	0.230093	0.0202743	0.637401	-0.060936	0.677981	0.0606645	0.606067	0.217479	0.512528	0.0036982
540	rs13476267	1	180.284	0.335871	0.0356509	0.158204	0.0126326	0.156414	0.0200576	0.230093	0.0202743	0.637401	-0.060936	0.677981	0.0606645	0.606067	0.217479	0.512528	0.0036982
541	D1Mit426	1	180.412	0.335871	0.0356509	0.158204	0.0126326	0.156414	0.0200576	0.230093	0.0202743	0.637401	-0.060936	0.677981	0.0606645	0.606067	0.217479	0.512528	0.0036982
542	rs31837265	1	181.476	0.335871	0.0356509	0.158204	0.0126326	0.156414	0.0200576	0.230093	0.0202743	0.637401	-0.060936	0.677981	0.0606645	0.606067	0.217479	0.512528	0.0036982
543	rs32603212	1	181.549	0.335871	0.0356509	0.158204	0.0126326	0.156414	0.0200576	0.230093	0.0202743	0.637401	-0.060936	0.677981	0.0606645	0.606067	0.217479	0.512528	0.0036982
544	rs33816636	1	182.002	0.335871	0.0356509	0.158204	0.0126326	0.156414	0.0200576	0.230093	0.0202743	0.637401	-0.060936	0.677981	0.0606645	0.606067	0.217479	0.512528	0.0036982
545	rs8280550	1	182.478	0.335871	0.0356509	0.158204	0.0126326	0.156414	0.0200576	0.230093	0.0202743	0.637401	-0.060936	0.677981	0.0606645	0.606067	0.217479	0.512528	0.0036982
546	rs32337187	1	182.749	0.335871	0.0356509	0.158204	0.0126326	0.156414	0.0200576	0.230093	0.0202743	0.637401	-0.060936	0.677981	0.0606645	0.606067	0.217479	0.512528	0.0036982
547	rs49919565	1	182.949	0.335871	0.0356509	0.158204	0.0126326	0.156414	0.0200576	0.230093	0.0202743	0.637401	-0.060936	0.677981	0.0606645	0.606067	0.217479	0.512528	0.0036982
548	rs30696745	1	183.513	0.335871	0.0356509	0.158204	0.0126326	0.156414	0.0200576	0.230093	0.0202743	0.637401	-0.060936	0.677981	0.0606645	0.606067	0.217479	0.512528	0.0036982
549	rs50246612	1	183.579	0.335871	0.0356509	0.158204	0.0126326	0.156414	0.0200576	0.230093	0.0202743	0.637401	-0.060936	0.677981	0.0606645	0.606067	0.217479	0.512528	0.0036982
550	rs49141251	1	183.605	0.335871	0.0356509	0.158204	0.0126326	0.156414	0.0200576	0.230093	0.0202743	0.637401	-0.060936	0.677981	0.0606645	0.606067	0.217479	0.512528	0.0036982
551	rs31307349	1	183.947	0.199919	0.0237454	0.20242	-0.0159936	0.0650183	-0.00925961	0.0175566	-0.00191098	2.03133	-0.130619	0.0791549	0.0104482	0.449522	0.347249	0.340766	0.00278303
552	rs46841759	1	183.949	0.199919	0.0237454	0.20242	-0.0159936	0.0650183	-0.00925961	0.0175566	-0.00191098	2.03133	-0.130619	0.0791549	0.0104482	0.449522	0.347249	0.340766	0.00278303
553	rs30477005	1	184.19	0.199919	0.0237454	0.20242	-0.0159936	0.0650183	-0.00925961	0.0175566	-0.00191098	2.03133	-0.130619	0.0791549	0.0104482	0.449522	0.347249	0.340766	0.00278303
554	rs13476281	1	184.322	0.199919	0.0237454	0.20242	-0.0159936	0.0650183	-0.00925961	0.0175566	-0.00191098	2.03133	-0.130619	0.0791549	0.0104482	0.449522	0.347249	0.340766	0.00278303
555	rs37406736	1	184.323	0.199919	0.0237454	0.20242	-0.0159936	0.0650183	-0.00925961	0.0175566	-0.00191098	2.03133	-0.130619	0.0791549	0.0104482	0.449522	0.347249	0.340766	0.00278303
556	rs32470790	1	184.324	0.199919	0.0237454	0.20242	-0.0159936	0.0650183	-0.00925961	0.0175566	-0.00191098	2.03133	-0.130619	0.0791549	0.0104482	0.449522	0.347249	0.340766	0.00278303
557	rs3681873	1	184.445	0.135327	0.016622	0.519045	-0.0331815	0.0312672	-0.00452849	0.153147	-0.0143993	2.04976	-0.129253	0.101519	-0.0128075	0.31565	0.500794	0.309462	0.00249109
558	rs48322183	1	184.558	0.135327	0.016622	0.519045	-0.0331815	0.0312672	-0.00452849	0.153147	-0.0143993	2.04976	-0.129253	0.101519	-0.0128075	0.31565	0.500794	0.309462	0.00249109
559	D1Mit291	1	184.73	0.00618039	0.000938275	0.710654	-0.0452368	0.145587	-0.020716	0.552425	-0.0441299	2.40166	-0.152791	0.0394661	-0.00577417	0.123258	0.909185	0.261812	0.0023257
560	rs31785670	1	184.88	0.00618039	0.000938275	0.710654	-0.0452368	0.145587	-0.020716	0.552425	-0.0441299	2.40166	-0.152791	0.0394661	-0.00577417	0.123258	0.909185	0.261812	0.0023257
561	rs33828269	1	184.91	0.0818419	0.0120505	0.228935	-0.0198382	0.0535335	0.00867191	0.242233	-0.0242899	1.42001	-0.117631	0.118995	0.0169743	0.626433	0.203125	0.765873	0.00554062
562	rs49916193	1	185.166	0.0818419	0.0120505	0.228935	-0.0198382	0.0535335	0.00867191	0.242233	-0.0242899	1.42001	-0.117631	0.118995	0.0169743	0.626433	0.203125	0.765873	0.00554062
563	rs6154379	1	185.178	0.0818419	0.0120505	0.228935	-0.0198382	0.0535335	0.00867191	0.242233	-0.0242899	1.42001	-0.117631	0.118995	0.0169743	0.626433	0.203125	0.765873	0.00554062
564	rs30908228	1	185.218	0.0818419	0.0120505	0.228935	-0.0198382	0.0535335	0.00867191	0.242233	-0.0242899	1.42001	-0.117631	0.118995	0.0169743	0.626433	0.203125	0.765873	0.00554062
565	rs259343497	1	185.791	0.1602	0.0221169	0.224175	-0.0195308	0.0483853	0.00791854	0.546334	-0.0459629	0.867745	-0.085472	0.117376	0.0168158	0.699035	0.155501	0.543281	0.00429842
566	rs253187153	1	185.795	0.1602	0.0221169	0.224175	-0.0195308	0.0483853	0.00791854	0.546334	-0.0459629	0.867745	-0.085472	0.117376	0.0168158	0.699035	0.155501	0.543281	0.00429842
567	rs32850226	1	185.849	0.416291	0.0474106	0.262644	-0.0217827	0.0933845	0.0143216	0.285012	-0.0272774	0.315421	-0.0393754	0.200221	0.0262831	0.84109	0.0751577	0.427761	0.00351134
568	rs32516008	1	185.862	0.389309	0.0452188	0.408753	-0.031147	0.0121497	0.00203568	0.37191	-0.033895	0.282466	-0.0361585	0.106613	0.0151729	0.841656	0.0748654	0.324977	0.0028417
569	rs13476286	1	185.887	0.349372	0.0405213	0.557255	-0.038439	0.0640146	-0.00991914	0.450049	-0.0383166	0.242688	-0.0312139	0.02399	0.00361191	0.802789	0.0953986	0.225094	0.00206546
570	rs32287507	1	186.131	0.349372	0.0405213	0.557255	-0.038439	0.0640146	-0.00991914	0.450049	-0.0383166	0.242688	-0.0312139	0.02399	0.00361191	0.802789	0.0953986	0.225094	0.00206546
571	rs225810346	1	186.207	0.743817	0.0705759	0.551582	-0.0379958	0.127502	0.0185741	0.465887	-0.0392462	0.148987	-0.0204877	0.00585215	0.000896106	0.667461	0.175574	0.137173	0.00134183
572	rs13476288	1	186.237	0.870721	0.0790709	0.376417	-0.0285304	0.50686	0.0580051	0.228346	-0.0223715	0.112476	0.0160171	0.0949944	-0.0133757	0.608551	0.215703	0.453726	0.00363431
573	rs13476289	1	186.629	0.870721	0.0790709	0.376417	-0.0285304	0.50686	0.0580051	0.228346	-0.0223715	0.112476	0.0160171	0.0949944	-0.0133757	0.608551	0.215703	0.453726	0.00363431
574	rs31553683	1	186.81	0.870721	0.0790709	0.376417	-0.0285304	0.50686	0.0580051	0.228346	-0.0223715	0.112476	0.0160171	0.0949944	-0.0133757	0.608551	0.215703	0.453726	0.00363431
575	rs32765300	1	186.895	0.870721	0.0790709	0.376417	-0.0285304	0.50686	0.0580051	0.228346	-0.0223715	0.112476	0.0160171	0.0949944	-0.0133757	0.608551	0.215703	0.453726	0.00363431
576	rs30819961	1	187.001	0.870721	0.0790709	0.376417	-0.0285304	0.50686	0.0580051	0.228346	-0.0223715	0.112476	0.0160171	0.0949944	-0.0133757	0.608551	0.215703	0.453726	0.00363431
577	rs31639995	1	187.054	0.870721	0.0790709	0.376417	-0.0285304	0.50686	0.0580051	0.228346	-0.0223715	0.112476	0.0160171	0.0949944	-0.0133757	0.608551	0.215703	0.453726	0.00363431
578	rs31963150	1	187.135	0.870721	0.0790709	0.376417	-0.0285304	0.50686	0.0580051	0.228346	-0.0223715	0.112476	0.0160171	0.0949944	-0.0133757	0.608551	0.215703	0.453726	0.00363431
579	rs13476290	1	187.169	0.870721	0.0790709	0.376417	-0.0285304	0.50686	0.0580051	0.228346	-0.0223715	0.112476	0.0160171	0.0949944	-0.0133757	0.608551	0.215703	0.453726	0.00363431
580	rs32930910	1	187.393	0.870721	0.0790709	0.376417	-0.0285304	0.50686	0.0580051	0.228346	-0.0223715	0.112476	0.0160171	0.0949944	-0.0133757	0.608551	0.215703	0.453726	0.00363431
581	rs32940354	1	187.463	0.870721	0.0790709	0.376417	-0.0285304	0.50686	0.0580051	0.228346	-0.0223715	0.112476	0.0160171	0.0949944	-0.0133757	0.608551	0.215703	0.453726	0.00363431
582	rs32943482	1	187.571	0.870721	0.0790709	0.376417	-0.0285304	0.50686	0.0580051	0.228346	-0.0223715	0.112476	0.0160171	0.0949944	-0.0133757	0.608551	0.215703	0.453726	0.00363431
583	rs31574365	1	187.596	0.870721	0.0790709	0.376417	-0.0285304	0.50686	0.0580051	0.228346	-0.0223715	0.112476	0.0160171	0.0949944	-0.0133757	0.608551	0.215703	0.453726	0.00363431
584	rs31842689	1	187.598	0.870721	0.0790709	0.376417	-0.0285304	0.50686	0.0580051	0.228346	-0.0223715	0.112476	0.0160171	0.0949944	-0.0133757	0.608551	0.215703	0.453726	0.00363431
585	rs46826113	1	187.622	0.870721	0.0790709	0.376417	-0.0285304	0.50686	0.0580051	0.228346	-0.0223715	0.112476	0.0160171	0.0949944	-0.0133757	0.608551	0.215703	0.453726	0.00363431
586	rs48848476	1	187.901	0.870721	0.0790709	0.376417	-0.0285304	0.50686	0.0580051	0.228346	-0.0223715	0.112476	0.0160171	0.0949944	-0.0133757	0.608551	0.215703	0.453726	0.00363431
587	rs32769253	1	187.919	0.941902	0.0854451	0.245312	-0.020667	0.678466	0.0732385	0.16174	-0.0170565	0.0885331	0.0131688	0.0164514	-0.00256491	0.631741	0.199461	0.584431	0.00447077
588	rs52611989	1	187.925	0.941902	0.0854451	0.245312	-0.020667	0.678466	0.0732385	0.16174	-0.0170565	0.0885331	0.0131688	0.0164514	-0.00256491	0.631741	0.199461	0.584431	0.00447077
589	rs32676547	1	188.035	0.941902	0.0854451	0.245312	-0.020667	0.678466	0.0732385	0.16174	-0.0170565	0.0885331	0.0131688	0.0164514	-0.00256491	0.631741	0.199461	0.584431	0.00447077
590	rs3666905	1	188.043	0.941902	0.0854451	0.245312	-0.020667	0.678466	0.0732385	0.16174	-0.0170565	0.0885331	0.0131688	0.0164514	-0.00256491	0.631741	0.199461	0.584431	0.00447077
591	rs30555925	1	188.247	0.841961	0.0794146	0.277095	-0.0229548	0.83429	0.0853397	0.126773	-0.0138255	0.0834313	0.0125097	0.0248382	-0.0038572	0.609127	0.215292	0.519252	0.0041036
592	rs13476293	1	188.263	0.974039	0.086942	0.123314	-0.0113518	0.8437	0.084456	0.0951303	-0.0105523	0.0627781	0.00952905	0.0590021	0.00874648	0.621418	0.206616	0.711419	0.00512985
593	rs31396325	1	188.515	0.974039	0.086942	0.123314	-0.0113518	0.8437	0.084456	0.0951303	-0.0105523	0.0627781	0.00952905	0.0590021	0.00874648	0.621418	0.206616	0.711419	0.00512985
594	rs3655423	1	188.518	0.653576	0.0638671	0.140342	0.0123656	1.20779	0.101984	0.0791212	0.0086471	0.44396	0.0489517	0.412899	0.0456542	0.331821	0.479096	1.19658	0.0069099
595	rs49276806	1	188.526	0.653576	0.0638671	0.140342	0.0123656	1.20779	0.101984	0.0791212	0.0086471	0.44396	0.0489517	0.412899	0.0456542	0.331821	0.479096	1.19658	0.0069099
596	rs32528185	1	188.66	0.653576	0.0638671	0.140342	0.0123656	1.20779	0.101984	0.0791212	0.0086471	0.44396	0.0489517	0.412899	0.0456542	0.331821	0.479096	1.19658	0.0069099
597	rs36403320	1	188.808	0.653576	0.0638671	0.140342	0.0123656	1.20779	0.101984	0.0791212	0.0086471	0.44396	0.0489517	0.412899	0.0456542	0.331821	0.479096	1.19658	0.0069099
598	rs31624276	1	189.029	0.653576	0.0638671	0.140342	0.0123656	1.20779	0.101984	0.0791212	0.0086471	0.44396	0.0489517	0.412899	0.0456542	0.331821	0.479096	1.19658	0.0069099
599	rs36292189	1	189.032	0.653576	0.0638671	0.140342	0.0123656	1.20779	0.101984	0.0791212	0.0086471	0.44396	0.0489517	0.412899	0.0456542	0.331821	0.479096	1.19658	0.0069099
600	rs31619477	1	189.136	0.708308	0.0651667	0.47452	0.0323792	1.35201	0.104792	0.331022	0.0286976	0.668299	0.0640007	0.669931	0.062964	0.0801905	1.09588	1.10969	0.00652925
601	rs32790314	1	189.17	0.578458	0.057598	0.8992	0.0523385	1.88578	0.131937	0.700136	0.0516354	0.843809	0.0767865	0.667467	0.0640751	0.0119362	1.92313	0.931184	0.00584023
602	rs32404005	1	189.223	0.307323	0.0350822	1.46547	0.0705596	1.14308	0.0970169	1.00566	0.0652004	0.755491	0.0703973	1.14431	0.0902992	0.0082335	2.08442	1.17495	0.00670775
603	rs30604277	1	189.362	0.411016	0.0451821	1.28006	0.0667256	0.876881	0.0834222	0.783048	0.0564574	0.622163	0.0629521	1.3972	0.105052	0.016148	1.79188	1.48969	0.00800519
604	rs3675669	1	189.806	0.411016	0.0451821	1.28006	0.0667256	0.876881	0.0834222	0.783048	0.0564574	0.622163	0.0629521	1.3972	0.105052	0.016148	1.79188	1.48969	0.00800519
605	rs30553311	1	189.893	0.411016	0.0451821	1.28006	0.0667256	0.876881	0.0834222	0.783048	0.0564574	0.622163	0.0629521	1.3972	0.105052	0.016148	1.79188	1.48969	0.00800519
606	rs32180871	1	189.995	0.411016	0.0451821	1.28006	0.0667256	0.876881	0.0834222	0.783048	0.0564574	0.622163	0.0629521	1.3972	0.105052	0.016148	1.79188	1.48969	0.00800519
607	rs32051408	1	190.086	0.411016	0.0451821	1.28006	0.0667256	0.876881	0.0834222	0.783048	0.0564574	0.622163	0.0629521	1.3972	0.105052	0.016148	1.79188	1.48969	0.00800519
608	rs31378221	1	190.125	0.514937	0.0530413	1.19497	0.0628061	0.774363	0.0760501	0.539265	0.0429424	0.704427	0.0673855	1.25623	0.0976424	0.0281272	1.55087	1.12274	0.00656564
609	rs32133051	1	190.668	0.514937	0.0530413	1.19497	0.0628061	0.774363	0.0760501	0.539265	0.0429424	0.704427	0.0673855	1.25623	0.0976424	0.0281272	1.55087	1.12274	0.00656564
610	rs31813445	1	191.001	0.514937	0.0530413	1.19497	0.0628061	0.774363	0.0760501	0.539265	0.0429424	0.704427	0.0673855	1.25623	0.0976424	0.0281272	1.55087	1.12274	0.00656564
611	rs6210519	1	191.333	0.316793	0.0335404	1.31107	0.0611515	0.545006	0.0543314	0.427754	0.0331519	0.568922	0.0543456	0.942358	0.0750659	0.0900839	1.04535	0.551799	0.00387924
612	rs33836586	1	191.599	0.316793	0.0335404	1.31107	0.0611515	0.545006	0.0543314	0.427754	0.0331519	0.568922	0.0543456	0.942358	0.0750659	0.0900839	1.04535	0.551799	0.00387924
613	rs31002906	1	191.601	0.316793	0.0335404	1.31107	0.0611515	0.545006	0.0543314	0.427754	0.0331519	0.568922	0.0543456	0.942358	0.0750659	0.0900839	1.04535	0.551799	0.00387924
614	rs30600086	1	191.901	0.316793	0.0335404	1.31107	0.0611515	0.545006	0.0543314	0.427754	0.0331519	0.568922	0.0543456	0.942358	0.0750659	0.0900839	1.04535	0.551799	0.00387924
615	rs8253327	1	191.908	0.331797	0.034464	1.2147	0.0575391	0.499674	0.0502654	0.337887	0.0272693	0.484074	0.0477732	1.22756	0.0887105	0.0919302	1.03654	0.532229	0.00375832
616	rs49775781	1	191.965	0.331797	0.034464	1.2147	0.0575391	0.499674	0.0502654	0.337887	0.0272693	0.484074	0.0477732	1.22756	0.0887105	0.0919302	1.03654	0.532229	0.00375832
617	rs31784615	1	191.97	0.234791	0.0257844	0.578753	0.0345842	0.226396	0.0267158	0.0971891	0.00929557	0.0725338	0.00951037	0.866697	0.0699094	0.654326	0.184206	0.148433	0.00131934
618	rs48016635	1	191.979	0.417428	0.0405105	0.694134	0.0392171	0.358888	0.0385517	0.397653	0.0304934	0.0856026	0.0110451	0.73182	0.0622062	0.41665	0.380228	0.205854	0.00174765
619	rs52191121	1	192.075	0.417428	0.0405105	0.694134	0.0392171	0.358888	0.0385517	0.397653	0.0304934	0.0856026	0.0110451	0.73182	0.0622062	0.41665	0.380228	0.205854	0.00174765
620	rs30762235	1	192.142	1.02694	0.0812462	1.02486	0.0540148	0.632965	0.0628047	0.451572	0.0356392	0.327507	0.0368161	1.07321	0.0854311	0.0519561	1.28436	0.266859	0.00222686
621	rs50259858	1	192.155	1.02694	0.0812462	1.02486	0.0540148	0.632965	0.0628047	0.451572	0.0356392	0.327507	0.0368161	1.07321	0.0854311	0.0519561	1.28436	0.266859	0.00222686
622	rs30997318	1	192.413	1.02694	0.0812462	1.02486	0.0540148	0.632965	0.0628047	0.451572	0.0356392	0.327507	0.0368161	1.07321	0.0854311	0.0519561	1.28436	0.266859	0.00222686
623	rs33068074	1	192.43	1.02694	0.0812462	1.02486	0.0540148	0.632965	0.0628047	0.451572	0.0356392	0.327507	0.0368161	1.07321	0.0854311	0.0519561	1.28436	0.266859	0.00222686
624	rs32793860	1	192.528	1.30961	0.0955034	1.52163	0.0698246	0.900285	0.0808808	0.457646	0.0364469	0.533542	0.053711	1.01196	0.0829155	0.00938991	2.02734	0.334062	0.00266184
625	rs13500420	1	192.926	1.30961	0.0955034	1.52163	0.0698246	0.900285	0.0808808	0.457646	0.0364469	0.533542	0.053711	1.01196	0.0829155	0.00938991	2.02734	0.334062	0.00266184
626	rs30897483	1	192.942	1.30961	0.0955034	1.52163	0.0698246	0.900285	0.0808808	0.457646	0.0364469	0.533542	0.053711	1.01196	0.0829155	0.00938991	2.02734	0.334062	0.00266184
627	rs13476310	1	193.475	1.30961	0.0955034	1.52163	0.0698246	0.900285	0.0808808	0.457646	0.0364469	0.533542	0.053711	1.01196	0.0829155	0.00938991	2.02734	0.334062	0.00266184
628	rs31478915	1	193.481	1.15221	0.0878883	1.79604	0.0766057	1.21153	0.0979386	0.660666	0.0475106	0.672871	0.0634511	0.847277	0.0735245	0.00367987	2.43417	0.214132	0.00184336
629	rs33174703	1	193.514	1.15221	0.0878883	1.79604	0.0766057	1.21153	0.0979386	0.660666	0.0475106	0.672871	0.0634511	0.847277	0.0735245	0.00367987	2.43417	0.214132	0.00184336
630	rs30453157	1	194.053	1.15221	0.0878883	1.79604	0.0766057	1.21153	0.0979386	0.660666	0.0475106	0.672871	0.0634511	0.847277	0.0735245	0.00367987	2.43417	0.214132	0.00184336
631	rs32271175	1	194.149	1.15221	0.0878883	1.79604	0.0766057	1.21153	0.0979386	0.660666	0.0475106	0.672871	0.0634511	0.847277	0.0735245	0.00367987	2.43417	0.214132	0.00184336
632	rs13476313	1	194.162	1.15221	0.0878883	1.79604	0.0766057	1.21153	0.0979386	0.660666	0.0475106	0.672871	0.0634511	0.847277	0.0735245	0.00367987	2.43417	0.214132	0.00184336
633	rs45997766	1	194.505	1.15221	0.0878883	1.79604	0.0766057	1.21153	0.0979386	0.660666	0.0475106	0.672871	0.0634511	0.847277	0.0735245	0.00367987	2.43417	0.214132	0.00184336
634	rs32662997	1	194.759	1.15221	0.0878883	1.79604	0.0766057	1.21153	0.0979386	0.660666	0.0475106	0.672871	0.0634511	0.847277	0.0735245	0.00367987	2.43417	0.214132	0.00184336
635	rs29611294	1	195.288	1.15221	0.0878883	1.79604	0.0766057	1.21153	0.0979386	0.660666	0.0475106	0.672871	0.0634511	0.847277	0.0735245	0.00367987	2.43417	0.214132	0.00184336
636	rs29609526	1	195.308	1.15221	0.0878883	1.79604	0.0766057	1.21153	0.0979386	0.660666	0.0475106	0.672871	0.0634511	0.847277	0.0735245	0.00367987	2.43417	0.214132	0.00184336
637	rs33299937	2	5.65301	0.215903	0.0226178	0.113194	0.00873249	0.0925086	-0.0116596	0.0159852	-0.00160838	0.207973	-0.0239689	0.299237	-0.0310843	0.976239	0.0104439	0.269275	-0.0021521
638	rs13476332	2	6.31132	0.215903	0.0226178	0.113194	0.00873249	0.0925086	-0.0116596	0.0159852	-0.00160838	0.207973	-0.0239689	0.299237	-0.0310843	0.976239	0.0104439	0.269275	-0.0021521
639	rs13476335	2	7.69642	0.0857702	0.0105384	0.0213443	0.00188921	0.230246	-0.0272576	0.306398	-0.0254186	0.320078	-0.0357027	0.183881	-0.02174	0.94776	0.0233019	0.269275	-0.0021521
640	Affy_4430433etal	2	9	0.0857702	0.0105384	0.0213443	0.00188921	0.230246	-0.0272576	0.306398	-0.0254186	0.320078	-0.0357027	0.183881	-0.02174	0.94776	0.0233019	0.269275	-0.0021521
641	rs33562363	2	9.82966	0.183686	0.019518	0.0013928	-0.000119156	0.17688	-0.0205875	0.22228	-0.0184391	0.461295	-0.044463	0.974268	-0.0735948	0.676983	0.169422	0.668577	-0.00419961
642	rs13476350	2	11.7859	0.488961	0.0427705	0.208338	0.0148089	0.152217	0.0181901	0.355671	0.0272042	0.20147	0.0231045	0.909045	-0.0707364	0.557894	0.253448	1.67725	-0.00745829
643	rs13476352	2	13.4362	0.620754	0.0509806	0.258404	0.0176897	0.0313075	0.00417042	0.299934	0.0236563	0.200087	0.0229284	0.865992	-0.0681634	0.573615	0.241379	1.48502	-0.00686001
644	rs29825025	2	13.6001	0.890811	0.0671681	0.23061	0.016601	0.126381	0.0158414	0.328122	0.0262054	0.12009	0.0150383	0.829101	-0.0680836	0.47595	0.322439	1.04422	-0.00566705
645	rs13476355	2	14.3951	0.890811	0.0671681	0.23061	0.016601	0.126381	0.0158414	0.328122	0.0262054	0.12009	0.0150383	0.829101	-0.0680836	0.47595	0.322439	1.04422	-0.00566705
646	Affy_PC2_15	2	15	0.564814	0.050299	0.0916596	0.00757721	0.0456214	-0.00632454	0.185494	0.0167847	0.0208329	-0.00294279	1.61082	-0.107006	0.478188	0.320401	0.771843	-0.00475637
647	rs13476358	2	16.3057	0.610488	0.0534313	0.185572	0.0142615	0.0337601	0.00476845	0.219746	0.0195	0.0618462	0.00841283	1.43805	-0.100363	0.466722	0.330941	0.802718	-0.00490726
648	rs27126014	2	17.8981	0.785062	0.0636932	0.27914	0.020142	0.302148	0.0341782	0.362097	0.029283	0.290023	0.0331554	1.35659	-0.0970141	0.213089	0.671438	0.400984	-0.00302387
649	rs29503212	2	17.9118	0.785062	0.0636932	0.27914	0.020142	0.302148	0.0341782	0.362097	0.029283	0.290023	0.0331554	1.35659	-0.0970141	0.213089	0.671438	0.400984	-0.00302387
650	rs27125983	2	17.9155	0.785062	0.0636932	0.27914	0.020142	0.302148	0.0341782	0.362097	0.029283	0.290023	0.0331554	1.35659	-0.0970141	0.213089	0.671438	0.400984	-0.00302387
651	rs27125935	2	17.9487	1.13324	0.0805375	0.150901	0.0119014	0.384015	0.0411097	0.510275	0.0378977	0.154691	0.0194072	0.885074	-0.0731796	0.25141	0.599618	0.192521	-0.00166198
652	rs6384589	2	18.2638	1.13324	0.0805375	0.150901	0.0119014	0.384015	0.0411097	0.510275	0.0378977	0.154691	0.0194072	0.885074	-0.0731796	0.25141	0.599618	0.192521	-0.00166198
653	rs13476363	2	18.6613	1.13324	0.0805375	0.150901	0.0119014	0.384015	0.0411097	0.510275	0.0378977	0.154691	0.0194072	0.885074	-0.0731796	0.25141	0.599618	0.192521	-0.00166198
654	rs27144318	2	18.7648	1.13324	0.0805375	0.150901	0.0119014	0.384015	0.0411097	0.510275	0.0378977	0.154691	0.0194072	0.885074	-0.0731796	0.25141	0.599618	0.192521	-0.00166198
655	rs33092900	2	19.0166	1.13324	0.0805375	0.150901	0.0119014	0.384015	0.0411097	0.510275	0.0378977	0.154691	0.0194072	0.885074	-0.0731796	0.25141	0.599618	0.192521	-0.00166198
656	rs13476364	2	19.0787	0.410747	0.0388507	0.0608998	-0.00504685	0.173934	0.02096	0.332044	0.0265227	0.0849677	-0.0109949	1.06618	-0.0806315	0.633208	0.198453	0.0919383	-0.000846003
657	rs27127331	2	19.7161	0.410747	0.0388507	0.0608998	-0.00504685	0.173934	0.02096	0.332044	0.0265227	0.0849677	-0.0109949	1.06618	-0.0806315	0.633208	0.198453	0.0919383	-0.000846003
658	rs49733425	2	19.7641	0.410747	0.0388507	0.0608998	-0.00504685	0.173934	0.02096	0.332044	0.0265227	0.0849677	-0.0109949	1.06618	-0.0806315	0.633208	0.198453	0.0919383	-0.000846003
659	rs27140323	2	19.979	0.410747	0.0388507	0.0608998	-0.00504685	0.173934	0.02096	0.332044	0.0265227	0.0849677	-0.0109949	1.06618	-0.0806315	0.633208	0.198453	0.0919383	-0.000846003
660	rs6292983	2	20.0173	0.410747	0.0388507	0.0608998	-0.00504685	0.173934	0.02096	0.332044	0.0265227	0.0849677	-0.0109949	1.06618	-0.0806315	0.633208	0.198453	0.0919383	-0.000846003
661	rs27136990	2	20.9631	0.410747	0.0388507	0.0608998	-0.00504685	0.173934	0.02096	0.332044	0.0265227	0.0849677	-0.0109949	1.06618	-0.0806315	0.633208	0.198453	0.0919383	-0.000846003
662	rs27137272	2	21.2363	0.410747	0.0388507	0.0608998	-0.00504685	0.173934	0.02096	0.332044	0.0265227	0.0849677	-0.0109949	1.06618	-0.0806315	0.633208	0.198453	0.0919383	-0.000846003
663	rs13476379	2	22.8209	0.410747	0.0388507	0.0608998	-0.00504685	0.173934	0.02096	0.332044	0.0265227	0.0849677	-0.0109949	1.06618	-0.0806315	0.633208	0.198453	0.0919383	-0.000846003
664	rs6193345	2	23.3438	0.410747	0.0388507	0.0608998	-0.00504685	0.173934	0.02096	0.332044	0.0265227	0.0849677	-0.0109949	1.06618	-0.0806315	0.633208	0.198453	0.0919383	-0.000846003
665	rs29866286	2	23.7662	0.410747	0.0388507	0.0608998	-0.00504685	0.173934	0.02096	0.332044	0.0265227	0.0849677	-0.0109949	1.06618	-0.0806315	0.633208	0.198453	0.0919383	-0.000846003
666	rs27219279	2	24.0762	0.410747	0.0388507	0.0608998	-0.00504685	0.173934	0.02096	0.332044	0.0265227	0.0849677	-0.0109949	1.06618	-0.0806315	0.633208	0.198453	0.0919383	-0.000846003
667	rs52428815	2	24.0936	0.380627	0.0368801	0.148387	-0.0114048	0.080473	0.010573	0.297699	0.0244391	0.184763	-0.0220642	1.23199	-0.0890867	0.554604	0.256017	0.0798483	-0.000745334
668	rs6286688	2	24.5352	0.380627	0.0368801	0.148387	-0.0114048	0.080473	0.010573	0.297699	0.0244391	0.184763	-0.0220642	1.23199	-0.0890867	0.554604	0.256017	0.0798483	-0.000745334
669	rs33287256	2	24.6759	0.380627	0.0368801	0.148387	-0.0114048	0.080473	0.010573	0.297699	0.0244391	0.184763	-0.0220642	1.23199	-0.0890867	0.554604	0.256017	0.0798483	-0.000745334
670	rs32869517	2	24.9169	0.380627	0.0368801	0.148387	-0.0114048	0.080473	0.010573	0.297699	0.0244391	0.184763	-0.0220642	1.23199	-0.0890867	0.554604	0.256017	0.0798483	-0.000745334
671	rs33279854	2	24.9485	0.380627	0.0368801	0.148387	-0.0114048	0.080473	0.010573	0.297699	0.0244391	0.184763	-0.0220642	1.23199	-0.0890867	0.554604	0.256017	0.0798483	-0.000745334
672	rs13476386	2	24.9718	0.380627	0.0368801	0.148387	-0.0114048	0.080473	0.010573	0.297699	0.0244391	0.184763	-0.0220642	1.23199	-0.0890867	0.554604	0.256017	0.0798483	-0.000745334
673	rs27186439	2	25.1001	0.380627	0.0368801	0.148387	-0.0114048	0.080473	0.010573	0.297699	0.0244391	0.184763	-0.0220642	1.23199	-0.0890867	0.554604	0.256017	0.0798483	-0.000745334
674	rs33369549	2	25.6303	0.380627	0.0368801	0.148387	-0.0114048	0.080473	0.010573	0.297699	0.0244391	0.184763	-0.0220642	1.23199	-0.0890867	0.554604	0.256017	0.0798483	-0.000745334
675	rs27195273	2	25.6496	0.187935	0.0214624	0.244816	-0.018082	0.081079	-0.0110624	0.107535	0.0105624	0.269563	-0.031084	0.955496	-0.0780708	0.744684	0.128028	0.00238849	2.46e-05
676	rs33136036	2	25.8527	0.187935	0.0214624	0.244816	-0.018082	0.081079	-0.0110624	0.107535	0.0105624	0.269563	-0.031084	0.955496	-0.0780708	0.744684	0.128028	0.00238853	2.46e-05
677	rs13476390	2	25.8712	0.187935	0.0214624	0.244816	-0.018082	0.081079	-0.0110624	0.107535	0.0105624	0.269563	-0.031084	0.955496	-0.0780708	0.744684	0.128028	0.00238849	2.46e-05
678	rs33081937	2	26.3677	0.187935	0.0214624	0.244816	-0.018082	0.081079	-0.0110624	0.107535	0.0105624	0.269563	-0.031084	0.955496	-0.0780708	0.744684	0.128028	0.00238849	2.46e-05
679	rs27184053	2	26.475	0.187935	0.0214624	0.244816	-0.018082	0.081079	-0.0110624	0.107535	0.0105624	0.269563	-0.031084	0.955496	-0.0780708	0.744684	0.128028	0.00238849	2.46e-05
680	rs27185513	2	26.8779	0.187935	0.0214624	0.244816	-0.018082	0.081079	-0.0110624	0.107535	0.0105624	0.269563	-0.031084	0.955496	-0.0780708	0.744684	0.128028	0.00238849	2.46e-05
681	rs13465578	2	27.0622	0.141223	0.0168509	0.275006	-0.0200327	0.0210306	-0.00307363	0.131113	0.0127124	0.270793	-0.0313523	0.987736	-0.0804801	0.752065	0.123745	0.0295795	-0.00029675
682	rs32863453	2	28.9698	0.325411	0.0327727	0.173407	-0.013141	0.14642	0.0182844	0.328246	0.0266166	0.185331	-0.0222214	1.26783	-0.0914278	0.513972	0.28906	0.116977	-0.00106008
683	rs13476408	2	30.441	0.22681	0.0242241	0.513935	-0.031046	0.198421	0.0235626	0.187366	0.0165708	0.298761	-0.0327349	2.01835	-0.119186	0.197801	0.703772	0.371512	-0.00276917
684	rs33734426	2	30.4483	0.22681	0.0242241	0.513935	-0.031046	0.198421	0.0235626	0.187366	0.0165708	0.298761	-0.0327349	2.01835	-0.119186	0.197801	0.703772	0.371512	-0.00276917
685	rs230572488	2	30.7942	0.22681	0.0242241	0.513935	-0.031046	0.198421	0.0235626	0.187366	0.0165708	0.298761	-0.0327349	2.01835	-0.119186	0.197801	0.703772	0.371512	-0.00276917
686	rs49829810	2	30.8101	0.22681	0.0242241	0.513935	-0.031046	0.198421	0.0235626	0.187366	0.0165708	0.298761	-0.0327349	2.01835	-0.119186	0.197801	0.703772	0.371512	-0.00276917
687	rs51006262	2	31.4004	0.22681	0.0242241	0.513935	-0.031046	0.198421	0.0235626	0.187366	0.0165708	0.298761	-0.0327349	2.01835	-0.119186	0.197801	0.703772	0.371512	-0.00276917
688	rs13476413	2	31.8227	0.22681	0.0242241	0.513935	-0.031046	0.198421	0.0235626	0.187366	0.0165708	0.298761	-0.0327349	2.01835	-0.119186	0.197801	0.703772	0.371512	-0.00276917
689	rs33371101	2	31.8363	0.22681	0.0242241	0.513935	-0.031046	0.198421	0.0235626	0.187366	0.0165708	0.298761	-0.0327349	2.01835	-0.119186	0.197801	0.703772	0.371512	-0.00276917
690	rs13474428	2	32.4026	0.22681	0.0242241	0.513935	-0.031046	0.198421	0.0235626	0.187366	0.0165708	0.298761	-0.0327349	2.01835	-0.119186	0.197801	0.703772	0.371512	-0.00276917
691	rs13459060	2	32.6149	0.22681	0.0242241	0.513935	-0.031046	0.198421	0.0235626	0.187366	0.0165708	0.298761	-0.0327349	2.01835	-0.119186	0.197801	0.703772	0.371512	-0.00276917
692	rs28204077	2	32.6516	0.22681	0.0242241	0.513935	-0.031046	0.198421	0.0235626	0.187366	0.0165708	0.298761	-0.0327349	2.01835	-0.119186	0.197801	0.703772	0.371512	-0.00276917
693	rs13476419	2	33.45	0.22681	0.0242241	0.513935	-0.031046	0.198421	0.0235626	0.187366	0.0165708	0.298761	-0.0327349	2.01835	-0.119186	0.197801	0.703772	0.371512	-0.00276917
694	rs32942981	2	33.607	0.22681	0.0242241	0.513935	-0.031046	0.198421	0.0235626	0.187366	0.0165708	0.298761	-0.0327349	2.01835	-0.119186	0.197801	0.703772	0.371512	-0.00276917
695	rs33645392	2	33.8792	0.22681	0.0242241	0.513935	-0.031046	0.198421	0.0235626	0.187366	0.0165708	0.298761	-0.0327349	2.01835	-0.119186	0.197801	0.703772	0.371512	-0.00276917
696	rs29963019	2	33.9307	0.22681	0.0242241	0.513935	-0.031046	0.198421	0.0235626	0.187366	0.0165708	0.298761	-0.0327349	2.01835	-0.119186	0.197801	0.703772	0.371512	-0.00276917
697	rs261548625	2	34.0735	0.22681	0.0242241	0.513935	-0.031046	0.198421	0.0235626	0.187366	0.0165708	0.298761	-0.0327349	2.01835	-0.119186	0.197801	0.703772	0.371512	-0.00276917
698	rs13476423	2	34.1348	0.22681	0.0242241	0.513935	-0.031046	0.198421	0.0235626	0.187366	0.0165708	0.298761	-0.0327349	2.01835	-0.119186	0.197801	0.703772	0.371512	-0.00276917
699	rs13476425	2	34.6235	0.22681	0.0242241	0.513935	-0.031046	0.198421	0.0235626	0.187366	0.0165708	0.298761	-0.0327349	2.01835	-0.119186	0.197801	0.703772	0.371512	-0.00276917
700	rs13476427	2	35.0136	0.22681	0.0242241	0.513935	-0.031046	0.198421	0.0235626	0.187366	0.0165708	0.298761	-0.0327349	2.01835	-0.119186	0.197801	0.703772	0.371512	-0.00276917
701	rs33169514	2	35.0161	0.22681	0.0242241	0.513935	-0.031046	0.198421	0.0235626	0.187366	0.0165708	0.298761	-0.0327349	2.01835	-0.119186	0.197801	0.703772	0.371512	-0.00276917
702	rs27168911	2	35.0211	0.22681	0.0242241	0.513935	-0.031046	0.198421	0.0235626	0.187366	0.0165708	0.298761	-0.0327349	2.01835	-0.119186	0.197801	0.703772	0.371512	-0.00276917
703	rs13476429	2	35.3971	0.22681	0.0242241	0.513935	-0.031046	0.198421	0.0235626	0.187366	0.0165708	0.298761	-0.0327349	2.01835	-0.119186	0.197801	0.703772	0.371512	-0.00276917
704	rs29781174	2	36.0979	0.3244	0.0345153	0.438464	-0.0294226	0.333627	0.0385502	0.0609431	0.0064149	0.0190637	-0.00281292	1.79767	-0.119482	0.320503	0.494168	0.309104	-0.00251841
705	rs3699934	2	36.1017	0.3244	0.0345153	0.438464	-0.0294226	0.333627	0.0385502	0.0609431	0.0064149	0.0190637	-0.00281292	1.79767	-0.119482	0.320503	0.494168	0.309104	-0.00251841
706	rs48574562	2	36.1143	0.3244	0.0345153	0.438464	-0.0294226	0.333627	0.0385502	0.0609431	0.0064149	0.0190637	-0.00281292	1.79767	-0.119482	0.320503	0.494168	0.309104	-0.00251841
707	rs27159829	2	36.2134	0.3244	0.0345153	0.438464	-0.0294226	0.333627	0.0385502	0.0609431	0.0064149	0.0190637	-0.00281292	1.79767	-0.119482	0.320503	0.494168	0.309104	-0.00251841
708	rs13476435	2	37.4297	0.3244	0.0345153	0.438464	-0.0294226	0.333627	0.0385502	0.0609431	0.0064149	0.0190637	-0.00281292	1.79767	-0.119482	0.320503	0.494168	0.309104	-0.00251841
709	rs3709811	2	37.6571	0.3244	0.0345153	0.438464	-0.0294226	0.333627	0.0385502	0.0609431	0.0064149	0.0190637	-0.00281292	1.79767	-0.119482	0.320503	0.494168	0.309104	-0.00251841
710	rs29522142	2	38.1637	0.3244	0.0345153	0.438464	-0.0294226	0.333627	0.0385502	0.0609431	0.0064149	0.0190637	-0.00281292	1.79767	-0.119482	0.320503	0.494168	0.309104	-0.00251841
711	rs32903643	2	38.5715	0.3244	0.0345153	0.438464	-0.0294226	0.333627	0.0385502	0.0609431	0.0064149	0.0190637	-0.00281292	1.79767	-0.119482	0.320503	0.494168	0.309104	-0.00251841
712	rs27145737	2	39.5071	0.3244	0.0345153	0.438464	-0.0294226	0.333627	0.0385502	0.0609431	0.0064149	0.0190637	-0.00281292	1.79767	-0.119482	0.320503	0.494168	0.309104	-0.00251841
713	rs27206251	2	40.0126	0.3244	0.0345153	0.438464	-0.0294226	0.333627	0.0385502	0.0609431	0.0064149	0.0190637	-0.00281292	1.79767	-0.119482	0.320503	0.494168	0.309104	-0.00251841
714	rs6323034	2	40.3409	0.3244	0.0345153	0.438464	-0.0294226	0.333627	0.0385502	0.0609431	0.0064149	0.0190637	-0.00281292	1.79767	-0.119482	0.320503	0.494168	0.309104	-0.00251841
715	rs29971702	2	40.7619	0.3244	0.0345153	0.438464	-0.0294226	0.333627	0.0385502	0.0609431	0.0064149	0.0190637	-0.00281292	1.79767	-0.119482	0.320503	0.494168	0.309104	-0.00251841
716	rs13476452	2	40.928	0.3244	0.0345153	0.438464	-0.0294226	0.333627	0.0385502	0.0609431	0.0064149	0.0190637	-0.00281292	1.79767	-0.119482	0.320503	0.494168	0.309104	-0.00251841
717	rs50161039	2	41.03	0.3244	0.0345153	0.438464	-0.0294226	0.333627	0.0385502	0.0609431	0.0064149	0.0190637	-0.00281292	1.79767	-0.119482	0.320503	0.494168	0.309104	-0.00251841
718	rs32887404	2	41.6214	0.3244	0.0345153	0.438464	-0.0294226	0.333627	0.0385502	0.0609431	0.0064149	0.0190637	-0.00281292	1.79767	-0.119482	0.320503	0.494168	0.309104	-0.00251841
719	rs27129544	2	41.626	0.3244	0.0345153	0.438464	-0.0294226	0.333627	0.0385502	0.0609431	0.0064149	0.0190637	-0.00281292	1.79767	-0.119482	0.320503	0.494168	0.309104	-0.00251841
720	rs27142415	2	42.3747	0.3244	0.0345153	0.438464	-0.0294226	0.333627	0.0385502	0.0609431	0.0064149	0.0190637	-0.00281292	1.79767	-0.119482	0.320503	0.494168	0.309104	-0.00251841
721	rs27157469	2	42.5566	0.129002	0.016337	0.588721	-0.0377505	0.113185	0.0158985	0.104258	-0.0108443	0.0819986	-0.0116147	1.43497	-0.107281	0.504031	0.297542	0.193573	-0.00173195
722	rs51648516	2	42.6695	0.144502	0.0181627	0.650682	-0.0408667	0.0939554	0.0135139	0.120329	-0.0124215	0.0972059	-0.0136595	1.22576	-0.097673	0.551212	0.258681	0.191335	-0.00172428
723	rs27142127	2	42.6742	0.157159	0.019297	0.698347	-0.0425219	0.0734926	0.0106292	0.134047	-0.0135038	0.111124	-0.015283	1.00287	-0.0845814	0.613713	0.212035	0.186398	-0.00167556
724	rs27141972	2	43.6322	0.00397846	-0.000578434	0.512261	-0.0345648	0.0159042	0.00248876	0.264367	-0.024532	0.00220529	-0.000343024	1.58303	-0.114869	0.531632	0.274389	0.406458	-0.00317463
725	rs45805909	2	43.6937	0.00397846	-0.000578434	0.512261	-0.0345648	0.0159042	0.00248876	0.264367	-0.024532	0.00220529	-0.000343024	1.58303	-0.114869	0.531632	0.274389	0.406458	-0.00317463
726	rs33052660	2	43.8489	0.00397846	-0.000578434	0.512261	-0.0345648	0.0159042	0.00248876	0.264367	-0.024532	0.00220529	-0.000343024	1.58303	-0.114869	0.531632	0.274389	0.406458	-0.00317463
727	rs13476466	2	43.978	0.00397846	-0.000578434	0.512261	-0.0345648	0.0159042	0.00248876	0.264367	-0.024532	0.00220529	-0.000343024	1.58303	-0.114869	0.531632	0.274389	0.406458	-0.00317463
728	rs33189126	2	44.3404	0.00397846	-0.000578434	0.512261	-0.0345648	0.0159042	0.00248876	0.264367	-0.024532	0.00220529	-0.000343024	1.58303	-0.114869	0.531632	0.274389	0.406458	-0.00317463
729	rs27123557	2	44.3429	0.00397846	-0.000578434	0.512261	-0.0345648	0.0159042	0.00248876	0.264367	-0.024532	0.00220529	-0.000343024	1.58303	-0.114869	0.531632	0.274389	0.406458	-0.00317463
730	rs13476467	2	44.4018	0.00397846	-0.000578434	0.512261	-0.0345648	0.0159042	0.00248876	0.264367	-0.024532	0.00220529	-0.000343024	1.58303	-0.114869	0.531632	0.274389	0.406458	-0.00317463
731	rs27156828	2	44.4795	0.17068	-0.0226038	0.695184	-0.0452586	0.185762	-0.0263614	0.335777	-0.0314569	0.0480107	0.00752935	1.47208	-0.115971	0.341378	0.466765	0.0523307	-0.000563279
732	rs27156779	2	44.5239	0.17068	-0.0226038	0.695184	-0.0452586	0.185762	-0.0263614	0.335777	-0.0314569	0.0480107	0.00752935	1.47208	-0.115971	0.341378	0.466765	0.0523307	-0.000563279
733	rs27157693	2	45.0565	0.17068	-0.0226038	0.695184	-0.0452586	0.185762	-0.0263614	0.335777	-0.0314569	0.0480107	0.00752935	1.47208	-0.115971	0.341378	0.466765	0.0523307	-0.000563279
734	rs27142767	2	45.1571	0.17068	-0.0226038	0.695184	-0.0452586	0.185762	-0.0263614	0.335777	-0.0314569	0.0480107	0.00752935	1.47208	-0.115971	0.341378	0.466765	0.0523307	-0.000563279
735	rs33464767	2	45.5299	0.17068	-0.0226038	0.695184	-0.0452586	0.185762	-0.0263614	0.335777	-0.0314569	0.0480107	0.00752935	1.47208	-0.115971	0.341378	0.466765	0.0523307	-0.000563279
736	rs29626286	2	45.5328	0.17068	-0.0226038	0.695184	-0.0452586	0.185762	-0.0263614	0.335777	-0.0314569	0.0480107	0.00752935	1.47208	-0.115971	0.341378	0.466765	0.0523307	-0.000563279
737	rs27918259	2	45.5567	0.17068	-0.0226038	0.695184	-0.0452586	0.185762	-0.0263614	0.335777	-0.0314569	0.0480107	0.00752935	1.47208	-0.115971	0.341378	0.466765	0.0523307	-0.000563279
738	rs27918174	2	45.6223	0.121566	-0.0157811	0.250674	-0.0197204	0.153889	-0.0210295	0.134201	-0.0137271	0.149163	0.0202472	0.702224	-0.0677213	0.860133	0.0654343	0.122956	0.00119956
739	rs13476473	2	46.0711	0.121566	-0.0157811	0.250674	-0.0197204	0.153889	-0.0210295	0.134201	-0.0137271	0.149163	0.0202472	0.702224	-0.0677213	0.860133	0.0654343	0.122956	0.00119956
740	rs27947458	2	46.1958	0.112491	-0.0139753	0.0285424	-0.00258873	0.0223551	-0.00328287	0.105277	0.0105277	0.440424	0.047151	0.250807	-0.0291908	0.9746	0.0111737	0.474492	0.00356607
741	rs3711308	2	46.229	0.085467	-0.010478	0.0476507	0.00409536	0.0579663	0.00789547	0.129444	0.0122027	0.572693	0.0555814	0.161081	-0.0193095	0.96264	0.0165361	0.440821	0.00329723
742	rs29722660	2	47.1597	0.085467	-0.010478	0.0476507	0.00409536	0.0579663	0.00789547	0.129444	0.0122027	0.572693	0.0555814	0.161081	-0.0193095	0.96264	0.0165361	0.440821	0.00329723
743	rs6265423	2	47.1646	0.085467	-0.010478	0.0476507	0.00409536	0.0579663	0.00789547	0.129444	0.0122027	0.572693	0.0555814	0.161081	-0.0193095	0.96264	0.0165361	0.440821	0.00329723
744	rs48903266	2	47.999	0.085467	-0.010478	0.0476507	0.00409536	0.0579663	0.00789547	0.129444	0.0122027	0.572693	0.0555814	0.161081	-0.0193095	0.96264	0.0165361	0.440821	0.00329723
745	rs27908812	2	47.9996	0.085467	-0.010478	0.0476507	0.00409536	0.0579663	0.00789547	0.129444	0.0122027	0.572693	0.0555814	0.161081	-0.0193095	0.96264	0.0165361	0.440821	0.00329723
746	rs27952986	2	48.4627	0.085467	-0.010478	0.0476507	0.00409536	0.0579663	0.00789547	0.129444	0.0122027	0.572693	0.0555814	0.161081	-0.0193095	0.96264	0.0165361	0.440821	0.00329723
747	rs46538890	2	48.7517	0.085467	-0.010478	0.0476507	0.00409536	0.0579663	0.00789547	0.129444	0.0122027	0.572693	0.0555814	0.161081	-0.0193095	0.96264	0.0165361	0.440821	0.00329723
748	rs27901995	2	50.6407	0.144107	-0.0162703	0.0714503	-0.00579188	0.0308188	-0.00417915	0.0256478	-0.00258192	0.577218	0.0541508	0.0112448	0.0015047	0.9841	0.00696061	0.950776	0.0055792
749	rs32934498	2	50.653	0.144107	-0.0162703	0.0714503	-0.00579188	0.0308188	-0.00417915	0.0256478	-0.00258192	0.577218	0.0541508	0.0112448	0.0015047	0.9841	0.00696061	0.950776	0.0055792
750	rs28328937	2	50.6601	0.144107	-0.0162703	0.0714503	-0.00579188	0.0308188	-0.00417915	0.0256478	-0.00258192	0.577218	0.0541508	0.0112448	0.0015047	0.9841	0.00696061	0.950776	0.0055792
751	rs29627139	2	50.7389	0.144107	-0.0162703	0.0714503	-0.00579188	0.0308188	-0.00417915	0.0256478	-0.00258192	0.577218	0.0541508	0.0112448	0.0015047	0.9841	0.00696061	0.950776	0.0055792
752	rs47816996	2	50.745	0.144107	-0.0162703	0.0714503	-0.00579188	0.0308188	-0.00417915	0.0256478	-0.00258192	0.577218	0.0541508	0.0112448	0.0015047	0.9841	0.00696061	0.950776	0.0055792
753	rs48302907	2	51.3132	0.144107	-0.0162703	0.0714503	-0.00579188	0.0308188	-0.00417915	0.0256478	-0.00258192	0.577218	0.0541508	0.0112448	0.0015047	0.9841	0.00696061	0.950776	0.0055792
754	rs27929487	2	51.3195	0.144107	-0.0162703	0.0714503	-0.00579188	0.0308188	-0.00417915	0.0256478	-0.00258192	0.577218	0.0541508	0.0112448	0.0015047	0.9841	0.00696061	0.950776	0.0055792
755	rs27929347	2	51.3859	0.144107	-0.0162703	0.0714503	-0.00579188	0.0308188	-0.00417915	0.0256478	-0.00258192	0.577218	0.0541508	0.0112448	0.0015047	0.9841	0.00696061	0.950776	0.0055792
756	rs3720957	2	51.3968	0.144107	-0.0162703	0.0714503	-0.00579188	0.0308188	-0.00417915	0.0256478	-0.00258192	0.577218	0.0541508	0.0112448	0.0015047	0.9841	0.00696061	0.950776	0.0055792
757	rs3706153	2	51.4155	0.144107	-0.0162703	0.0714503	-0.00579188	0.0308188	-0.00417915	0.0256478	-0.00258192	0.577218	0.0541508	0.0112448	0.0015047	0.9841	0.00696061	0.950776	0.0055792
758	rs33185243	2	51.6543	0.144107	-0.0162703	0.0714503	-0.00579188	0.0308188	-0.00417915	0.0256478	-0.00258192	0.577218	0.0541508	0.0112448	0.0015047	0.9841	0.00696061	0.950776	0.0055792
759	rs27897848	2	52.3067	0.144107	-0.0162703	0.0714503	-0.00579188	0.0308188	-0.00417915	0.0256478	-0.00258192	0.577218	0.0541508	0.0112448	0.0015047	0.9841	0.00696061	0.950776	0.0055792
760	rs29909943	2	52.3937	0.144107	-0.0162703	0.0714503	-0.00579188	0.0308188	-0.00417915	0.0256478	-0.00258192	0.577218	0.0541508	0.0112448	0.0015047	0.9841	0.00696061	0.950776	0.0055792
761	rs33671001	2	52.4268	0.144107	-0.0162703	0.0714503	-0.00579188	0.0308188	-0.00417915	0.0256478	-0.00258192	0.577218	0.0541508	0.0112448	0.0015047	0.9841	0.00696061	0.950776	0.0055792
762	rs13476499	2	52.4337	0.144107	-0.0162703	0.0714503	-0.00579188	0.0308188	-0.00417915	0.0256478	-0.00258192	0.577218	0.0541508	0.0112448	0.0015047	0.9841	0.00696061	0.950776	0.0055792
763	rs29668627	2	52.5756	0.144107	-0.0162703	0.0714503	-0.00579188	0.0308188	-0.00417915	0.0256478	-0.00258192	0.577218	0.0541508	0.0112448	0.0015047	0.9841	0.00696061	0.950776	0.0055792
764	rs33083288	2	52.6252	0.144107	-0.0162703	0.0714503	-0.00579188	0.0308188	-0.00417915	0.0256478	-0.00258192	0.577218	0.0541508	0.0112448	0.0015047	0.9841	0.00696061	0.950776	0.0055792
765	rs27927606	2	52.6468	0.144107	-0.0162703	0.0714503	-0.00579188	0.0308188	-0.00417915	0.0256478	-0.00258192	0.577218	0.0541508	0.0112448	0.0015047	0.9841	0.00696061	0.950776	0.0055792
766	rs27912607	2	52.7672	0.144107	-0.0162703	0.0714503	-0.00579188	0.0308188	-0.00417915	0.0256478	-0.00258192	0.577218	0.0541508	0.0112448	0.0015047	0.9841	0.00696061	0.950776	0.0055792
767	rs27913440	2	53.0503	0.144107	-0.0162703	0.0714503	-0.00579188	0.0308188	-0.00417915	0.0256478	-0.00258192	0.577218	0.0541508	0.0112448	0.0015047	0.9841	0.00696061	0.950776	0.0055792
768	rs13476503	2	53.1836	0.144107	-0.0162703	0.0714503	-0.00579188	0.0308188	-0.00417915	0.0256478	-0.00258192	0.577218	0.0541508	0.0112448	0.0015047	0.9841	0.00696061	0.950776	0.0055792
769	rs47801450	2	54.9364	0.144107	-0.0162703	0.0714503	-0.00579188	0.0308188	-0.00417915	0.0256478	-0.00258192	0.577218	0.0541508	0.0112448	0.0015047	0.9841	0.00696061	0.950776	0.0055792
770	rs27908481	2	55.0924	0.000513205	6.60853e-05	0.00498264	-0.000430219	0.127832	0.0156885	0.125143	0.0113774	0.683466	0.0609747	0.117386	-0.0140473	0.961919	0.0168616	0.768132	0.00480404
771	rs6201706	2	55.4139	0.250067	0.0252757	1.03523	0.0492185	0.66969	0.0585536	0.804461	0.0492031	2.54613	0.131567	0.202192	0.0219648	0.0131882	1.87981	0.947093	0.00537107
772	rs6247544	2	57.3152	0.250067	0.0252757	1.03523	0.0492185	0.66969	0.0585536	0.804461	0.0492031	2.54613	0.131567	0.202192	0.0219648	0.0131882	1.87981	0.947093	0.00537107
773	rs29714894	2	57.6589	0.250549	0.0255101	1.01662	0.0489357	0.656082	0.0581874	0.767673	0.0479983	2.48942	0.130317	0.292668	0.0300924	0.0138846	1.85747	0.943426	0.00537553
774	rs3663027	2	57.6599	0.247959	0.0252286	0.984392	0.0477398	0.632168	0.0564716	0.720002	0.0457409	2.40338	0.127126	0.389688	0.0376995	0.015978	1.79648	0.932044	0.00531877
775	rs27923118	2	57.8	0.247959	0.0252286	0.984392	0.0477398	0.632168	0.0564716	0.720002	0.0457409	2.40338	0.127126	0.389688	0.0376995	0.015978	1.79648	0.932044	0.00531877
776	rs48912331	2	57.8025	0.247959	0.0252286	0.984392	0.0477398	0.632168	0.0564716	0.720002	0.0457409	2.40338	0.127126	0.389688	0.0376995	0.015978	1.79648	0.932044	0.00531877
777	rs48958172	2	57.8649	0.247959	0.0252286	0.984392	0.0477398	0.632168	0.0564716	0.720002	0.0457409	2.40338	0.127126	0.389688	0.0376995	0.015978	1.79648	0.932044	0.00531877
778	rs13476520	2	58.0094	0.220388	0.0231994	0.532194	0.0317348	0.315792	0.0339136	0.469665	0.034136	2.00981	0.120765	0.086567	0.010669	0.159757	0.79654	0.520461	0.00365925
779	rs3672719	2	58.1896	0.427438	0.0401183	0.539029	0.0325415	0.392724	0.0410113	0.45847	0.0340991	1.53702	0.104365	0.0805355	0.010142	0.199633	0.699769	0.545873	0.00381433
780	rs27924920	2	58.4461	0.427438	0.0401183	0.539029	0.0325415	0.392724	0.0410113	0.45847	0.0340991	1.53702	0.104365	0.0805355	0.010142	0.199633	0.699769	0.545873	0.00381433
781	rs13476526	2	59.2264	1.27841	0.089263	0.943567	0.0505131	0.948587	0.0812691	0.728134	0.0501113	2.30877	0.136959	0.207431	0.0245904	0.00327158	2.48524	0.0953011	0.000914725
782	rs13476531	2	60.4411	1.27841	0.089263	0.943567	0.0505131	0.948587	0.0812691	0.728134	0.0501113	2.30877	0.136959	0.207431	0.0245904	0.00327158	2.48524	0.0953011	0.000914725
783	rs29863279	2	61.0794	0.243771	0.0248726	0.401209	0.0252309	0.203248	0.0231055	0.239656	0.0196324	1.19617	0.086963	0.0767921	-0.00938255	0.53991	0.267679	0.494619	0.00349317
784	rs28038082	2	61.3566	0.418056	0.034342	0.70007	0.0343628	0.479379	0.0408452	0.367591	0.0247416	0.961116	0.067714	0.13143	0.0136926	0.295568	0.529343	0.85466	0.00482511
785	rs32870391	2	61.4071	0.418056	0.034342	0.70007	0.0343628	0.479379	0.0408452	0.367591	0.0247416	0.961116	0.067714	0.13143	0.0136926	0.295568	0.529343	0.85466	0.00482511
786	rs28054403	2	61.6878	0.418056	0.034342	0.70007	0.0343628	0.479379	0.0408452	0.367591	0.0247416	0.961116	0.067714	0.13143	0.0136926	0.295568	0.529343	0.85466	0.00482511
787	rs33251754	2	62.0053	0.418056	0.034342	0.70007	0.0343628	0.479379	0.0408452	0.367591	0.0247416	0.961116	0.067714	0.13143	0.0136926	0.295568	0.529343	0.85466	0.00482511
788	rs52111367	2	62.1003	0.418056	0.034342	0.70007	0.0343628	0.479379	0.0408452	0.367591	0.0247416	0.961116	0.067714	0.13143	0.0136926	0.295568	0.529343	0.85466	0.00482511
789	rs28002412	2	62.1383	0.418056	0.034342	0.70007	0.0343628	0.479379	0.0408452	0.367591	0.0247416	0.961116	0.067714	0.13143	0.0136926	0.295568	0.529343	0.85466	0.00482511
790	rs6318340	2	62.1624	0.058073	0.00611171	0.375987	0.0213153	0.286021	0.0269196	0.240091	0.0173112	0.5026	0.0429671	0.045246	0.00504092	0.861248	0.064872	1.0116	0.00532325
791	rs28041963	2	62.3074	0.058073	0.00611171	0.375987	0.0213153	0.286021	0.0269196	0.240091	0.0173112	0.5026	0.0429671	0.045246	0.00504092	0.861248	0.064872	1.0116	0.00532325
792	rs28006671	2	62.5258	0.058073	0.00611171	0.375987	0.0213153	0.286021	0.0269196	0.240091	0.0173112	0.5026	0.0429671	0.045246	0.00504092	0.861248	0.064872	1.0116	0.00532325
793	rs28039503	2	62.6189	0.058073	0.00611171	0.375987	0.0213153	0.286021	0.0269196	0.240091	0.0173112	0.5026	0.0429671	0.045246	0.00504092	0.861248	0.064872	1.0116	0.00532325
794	rs3709716	2	62.6523	0.058073	0.00611171	0.375987	0.0213153	0.286021	0.0269196	0.240091	0.0173112	0.5026	0.0429671	0.045246	0.00504092	0.861248	0.064872	1.0116	0.00532325
795	rs28024010	2	62.6729	0.058073	0.00611171	0.375987	0.0213153	0.286021	0.0269196	0.240091	0.0173112	0.5026	0.0429671	0.045246	0.00504092	0.861248	0.064872	1.0116	0.00532325
796	rs45907259	2	62.7614	0.058073	0.00611171	0.375987	0.0213153	0.286021	0.0269196	0.240091	0.0173112	0.5026	0.0429671	0.045246	0.00504092	0.861248	0.064872	1.0116	0.00532325
797	rs28051456	2	62.8287	0.058073	0.00611171	0.375987	0.0213153	0.286021	0.0269196	0.240091	0.0173112	0.5026	0.0429671	0.045246	0.00504092	0.861248	0.064872	1.0116	0.00532325
798	rs33573911	2	63.4075	0.058073	0.00611171	0.375987	0.0213153	0.286021	0.0269196	0.240091	0.0173112	0.5026	0.0429671	0.045246	0.00504092	0.861248	0.064872	1.0116	0.00532325
799	rs28058008	2	63.4538	0.058073	0.00611171	0.375987	0.0213153	0.286021	0.0269196	0.240091	0.0173112	0.5026	0.0429671	0.045246	0.00504092	0.861248	0.064872	1.0116	0.00532325
800	rs13476540	2	63.5728	0.058073	0.00611171	0.375987	0.0213153	0.286021	0.0269196	0.240091	0.0173112	0.5026	0.0429671	0.045246	0.00504092	0.861248	0.064872	1.0116	0.00532325
801	rs33036606	2	63.8763	0.058073	0.00611171	0.375987	0.0213153	0.286021	0.0269196	0.240091	0.0173112	0.5026	0.0429671	0.045246	0.00504092	0.861248	0.064872	1.0116	0.00532325
802	UNC020085719	2	63.9068	0.058073	0.00611171	0.375987	0.0213153	0.286021	0.0269196	0.240091	0.0173112	0.5026	0.0429671	0.045246	0.00504092	0.861248	0.064872	1.0116	0.00532325
803	rs28006137	2	63.9215	0.058073	0.00611171	0.375987	0.0213153	0.286021	0.0269196	0.240091	0.0173112	0.5026	0.0429671	0.045246	0.00504092	0.861248	0.064872	1.0116	0.00532325
804	rs6314726	2	64.1128	0.058073	0.00611171	0.375987	0.0213153	0.286021	0.0269196	0.240091	0.0173112	0.5026	0.0429671	0.045246	0.00504092	0.861248	0.064872	1.0116	0.00532325
805	rs262554786	2	64.3985	0.058073	0.00611171	0.375987	0.0213153	0.286021	0.0269196	0.240091	0.0173112	0.5026	0.0429671	0.045246	0.00504092	0.861248	0.064872	1.0116	0.00532325
806	rs28014358	2	64.7884	0.058073	0.00611171	0.375987	0.0213153	0.286021	0.0269196	0.240091	0.0173112	0.5026	0.0429671	0.045246	0.00504092	0.861248	0.064872	1.0116	0.00532325
807	rs6302554	2	64.8586	0.058073	0.00611171	0.375987	0.0213153	0.286021	0.0269196	0.240091	0.0173112	0.5026	0.0429671	0.045246	0.00504092	0.861248	0.064872	1.0116	0.00532325
808	rs261180547	2	64.9075	0.058073	0.00611171	0.375987	0.0213153	0.286021	0.0269196	0.240091	0.0173112	0.5026	0.0429671	0.045246	0.00504092	0.861248	0.064872	1.0116	0.00532325
809	rs33044824	2	65.0346	0.058073	0.00611171	0.375987	0.0213153	0.286021	0.0269196	0.240091	0.0173112	0.5026	0.0429671	0.045246	0.00504092	0.861248	0.064872	1.0116	0.00532325
810	rs33364760	2	65.2401	0.058073	0.00611171	0.375987	0.0213153	0.286021	0.0269196	0.240091	0.0173112	0.5026	0.0429671	0.045246	0.00504092	0.861248	0.064872	1.0116	0.00532325
811	rs32879174	2	65.3458	0.058073	0.00611171	0.375987	0.0213153	0.286021	0.0269196	0.240091	0.0173112	0.5026	0.0429671	0.045246	0.00504092	0.861248	0.064872	1.0116	0.00532325
812	rs27980434	2	65.5549	0.058073	0.00611171	0.375987	0.0213153	0.286021	0.0269196	0.240091	0.0173112	0.5026	0.0429671	0.045246	0.00504092	0.861248	0.064872	1.0116	0.00532325
813	rs45637237	2	65.8058	0.0593985	0.00624683	0.393902	0.0221215	0.300516	0.0280321	0.266658	0.0188908	0.537445	0.0452478	0.00845864	-0.000981026	0.843192	0.0740733	1.02173	0.00536759
814	rs27983809	2	65.8075	0.0594969	0.00654777	0.352945	0.021217	0.222561	0.0229301	0.251904	0.0188881	0.458928	0.0419661	0.108454	-0.0119205	0.876955	0.0570227	0.787723	0.00465133
815	rs33749848	2	65.8447	0.0594969	0.00654777	0.352945	0.021217	0.222561	0.0229301	0.251904	0.0188881	0.458928	0.0419661	0.108454	-0.0119205	0.876955	0.0570227	0.787723	0.00465133
816	rs27983691	2	65.8662	0.0604553	0.0066065	0.368317	0.0218197	0.234614	0.0237949	0.277782	0.0203364	0.490329	0.0439588	0.177474	-0.018309	0.829403	0.0812345	0.791406	0.00465284
817	rs33134938	2	66.0907	0.0604553	0.0066065	0.368317	0.0218197	0.234614	0.0237949	0.277782	0.0203364	0.490329	0.0439588	0.177474	-0.018309	0.829403	0.0812345	0.791406	0.00465284
818	rs3715385	2	66.3502	0.0604553	0.0066065	0.368317	0.0218197	0.234614	0.0237949	0.277782	0.0203364	0.490329	0.0439588	0.177474	-0.018309	0.829403	0.0812345	0.791406	0.00465284
819	rs226268013	2	66.9591	0.00921935	-0.0011528	0.245295	0.0169356	0.116389	0.0140869	0.221994	0.0183545	0.578512	0.0533908	0.348951	-0.0346978	0.857513	0.0667591	0.623782	0.00416437
820	rs13476553	2	66.9679	0.0903459	-0.0107435	0.113536	0.00891875	0.00082007	-0.000115018	0.150113	0.013549	0.642573	0.0592359	0.555713	-0.0510359	0.847387	0.0719181	0.432574	0.00322339
821	rs28006972	2	67.0827	0.0903459	-0.0107435	0.113536	0.00891875	0.00082007	-0.000115018	0.150113	0.013549	0.642573	0.0592359	0.555713	-0.0510359	0.847387	0.0719181	0.432574	0.00322339
822	rs3022885	2	67.0929	0.0903459	-0.0107435	0.113536	0.00891875	0.00082007	-0.000115018	0.150113	0.013549	0.642573	0.0592359	0.555713	-0.0510359	0.847387	0.0719181	0.432574	0.00322339
823	rs33088023	2	67.7452	0.0903459	-0.0107435	0.113536	0.00891875	0.00082007	-0.000115018	0.150113	0.013549	0.642573	0.0592359	0.555713	-0.0510359	0.847387	0.0719181	0.432574	0.00322339
824	rs6305730	2	67.8563	0.0903459	-0.0107435	0.113536	0.00891875	0.00082007	-0.000115018	0.150113	0.013549	0.642573	0.0592359	0.555713	-0.0510359	0.847387	0.0719181	0.432574	0.00322339
825	rs27988512	2	68.8048	0.0477118	0.00604348	0.162467	0.012504	0.107382	0.0138504	0.202185	0.0178969	0.657832	0.0613903	0.422124	-0.0423885	0.832446	0.0796439	0.439639	0.00331046
826	rs33281348	2	69.3337	0.0871024	-0.010779	0.089221	0.00744349	0.00468635	-0.000679078	0.0961152	0.00942505	0.701305	0.0654024	0.601885	-0.0562023	0.838735	0.0763752	0.218502	0.00191537
827	rs8263080	2	69.3428	0.0663586	0.00845797	0.119699	0.00979638	0.0109547	0.00159223	0.258439	0.0225552	0.649494	0.0621475	0.584799	-0.0554821	0.801959	0.0958477	0.210611	0.00185787
828	rs27974255	2	69.4271	0.0663586	0.00845797	0.119699	0.00979638	0.0109547	0.00159223	0.258439	0.0225552	0.649494	0.0621475	0.584799	-0.0554821	0.801959	0.0958477	0.210611	0.00185787
829	rs32936671	2	69.4696	0.0663586	0.00845797	0.119699	0.00979638	0.0109547	0.00159223	0.258439	0.0225552	0.649494	0.0621475	0.584799	-0.0554821	0.801959	0.0958477	0.210611	0.00185787
830	rs29957293	2	69.6976	0.12961	0.0156239	0.282606	0.0205585	0.109342	0.0144704	0.503438	0.0382006	0.619187	0.0601697	0.94471	-0.0774475	0.45194	0.344919	0.0901198	-0.000869344
831	rs6275559	2	69.7246	0.12961	0.0156239	0.282606	0.0205585	0.109342	0.0144704	0.503438	0.0382006	0.619187	0.0601697	0.94471	-0.0774475	0.45194	0.344919	0.0901198	-0.000869344
832	rs29505018	2	69.89	0.12961	0.0156239	0.282606	0.0205585	0.109342	0.0144704	0.503438	0.0382006	0.619187	0.0601697	0.94471	-0.0774475	0.45194	0.344919	0.0901198	-0.000869344
833	rs27991749	2	69.9358	0.0764463	0.00981336	0.0556253	0.00489588	0.063058	0.00883922	0.255842	0.0227205	0.4122	0.0449387	1.29015	-0.0963075	0.623294	0.205307	0.0601657	-0.000601135
834	rs28337414	2	70.4947	0.0764463	0.00981336	0.0556253	0.00489588	0.063058	0.00883922	0.255842	0.0227205	0.4122	0.0449387	1.29015	-0.0963075	0.623294	0.205307	0.0601657	-0.000601135
835	rs28337407	2	70.496	0.0764463	0.00981336	0.0556253	0.00489588	0.063058	0.00883922	0.255842	0.0227205	0.4122	0.0449387	1.29015	-0.0963075	0.623294	0.205307	0.0601657	-0.000601135
836	rs28337139	2	70.5798	0.0764463	0.00981336	0.0556253	0.00489588	0.063058	0.00883922	0.255842	0.0227205	0.4122	0.0449387	1.29015	-0.0963075	0.623294	0.205307	0.0601657	-0.000601135
837	rs33890360	2	70.6132	0.117141	-0.0147397	0.0480996	-0.00434895	0.178163	-0.0228069	0.0372672	-0.0040223	0.0194146	-0.00290782	1.54653	-0.109761	0.705961	0.151219	0.0172144	-0.000185554
838	rs27976967	2	70.7165	0.0489629	-0.0065376	0.0375715	0.00341793	0.0630451	-0.00890311	0.116145	0.0116127	0.114744	0.0155794	1.43289	-0.104117	0.757147	0.12082	0.153322	-0.00143021
839	rs33660776	2	70.9164	0.190584	-0.0236518	0.102832	-0.00925987	0.356587	-0.0424545	0.163893	-0.0165105	0.0790767	0.0116037	1.73348	-0.123235	0.438059	0.358468	0.125649	-0.00125675
840	rs13476571	2	72.4018	0.58457	-0.0521802	0.219827	-0.016381	0.79513	-0.0691466	0.473419	-0.0353125	0.241805	-0.0282274	1.69784	-0.110281	0.10191	0.991782	0.0548863	-0.000540838
841	rs13476573	2	73.2951	0.58457	-0.0521802	0.219827	-0.016381	0.79513	-0.0691466	0.473419	-0.0353125	0.241805	-0.0282274	1.69784	-0.110281	0.10191	0.991782	0.0548863	-0.000540838
842	rs47442387	2	74.0492	0.58457	-0.0521802	0.219827	-0.016381	0.79513	-0.0691466	0.473419	-0.0353125	0.241805	-0.0282274	1.69784	-0.110281	0.10191	0.991782	0.0548863	-0.000540838
843	rs33069530	2	74.05	0.58457	-0.0521802	0.219827	-0.016381	0.79513	-0.0691466	0.473419	-0.0353125	0.241805	-0.0282274	1.69784	-0.110281	0.10191	0.991782	0.0548863	-0.000540838
844	rs27982516	2	74.0659	0.666957	-0.0555597	0.388664	-0.0251606	0.974779	-0.076588	0.743884	-0.0472954	0.212929	-0.0247125	1.14802	-0.084009	0.0874856	1.05806	0.239874	0.00197189
845	UNC020097695	2	74.2517	0.666957	-0.0555597	0.388664	-0.0251606	0.974779	-0.076588	0.743884	-0.0472954	0.212929	-0.0247125	1.14802	-0.084009	0.0874856	1.05806	0.239874	0.00197189
846	rs33706492	2	74.8803	0.666957	-0.0555597	0.388664	-0.0251606	0.974779	-0.076588	0.743884	-0.0472954	0.212929	-0.0247125	1.14802	-0.084009	0.0874856	1.05806	0.239874	0.00197189
847	rs27942036	2	75.1329	0.522499	-0.0468742	0.289628	-0.0200455	0.523014	-0.0502647	0.557802	-0.0388403	0.0118613	-0.00166397	1.08586	-0.0816712	0.315471	0.501041	0.576694	0.00390376
848	rs29913687	2	75.3275	0.522499	-0.0468742	0.289628	-0.0200455	0.523014	-0.0502647	0.557802	-0.0388403	0.0118613	-0.00166397	1.08586	-0.0816712	0.315471	0.501041	0.576694	0.00390376
849	rs216102912	2	75.3325	0.522499	-0.0468742	0.289628	-0.0200455	0.523014	-0.0502647	0.557802	-0.0388403	0.0118613	-0.00166397	1.08586	-0.0816712	0.315471	0.501041	0.576694	0.00390376
850	rs27993528	2	75.6432	0.522499	-0.0468742	0.289628	-0.0200455	0.523014	-0.0502647	0.557802	-0.0388403	0.0118613	-0.00166397	1.08586	-0.0816712	0.315471	0.501041	0.576694	0.00390376
851	rs13459064	2	75.6767	0.299355	-0.0315015	0.067128	-0.00571525	0.159936	-0.0201172	0.272853	-0.0231742	0.0667825	0.00903351	0.757768	-0.0660966	0.82448	0.0838197	0.899255	0.00542139
852	rs27963563	2	76.0177	0.299355	-0.0315015	0.067128	-0.00571525	0.159936	-0.0201172	0.272853	-0.0231742	0.0667825	0.00903351	0.757768	-0.0660966	0.82448	0.0838197	0.899255	0.00542139
853	rs3713848	2	76.0187	0.299355	-0.0315015	0.067128	-0.00571525	0.159936	-0.0201172	0.272853	-0.0231742	0.0667825	0.00903351	0.757768	-0.0660966	0.82448	0.0838197	0.899255	0.00542139
854	rs48080459	2	76.0249	0.299355	-0.0315015	0.067128	-0.00571525	0.159936	-0.0201172	0.272853	-0.0231742	0.0667825	0.00903351	0.757768	-0.0660966	0.82448	0.0838197	0.899255	0.00542139
855	rs3699089	2	76.1086	0.299355	-0.0315015	0.067128	-0.00571525	0.159936	-0.0201172	0.272853	-0.0231742	0.0667825	0.00903351	0.757768	-0.0660966	0.82448	0.0838197	0.899255	0.00542139
856	rs27944290	2	76.4917	0.299355	-0.0315015	0.067128	-0.00571525	0.159936	-0.0201172	0.272853	-0.0231742	0.0667825	0.00903351	0.757768	-0.0660966	0.82448	0.0838197	0.899255	0.00542139
857	rs13476589	2	78.1003	0.00885862	-0.00122412	0.186561	-0.0146445	0.278551	-0.0330199	0.267506	-0.0234434	0.272956	0.0320985	0.543144	-0.0535181	0.845979	0.0726406	0.987718	0.00590617
858	rs33691549	2	79.3421	0.217122	0.0255382	0.0242902	0.00227132	0.0233804	-0.00355333	0.0242979	0.00271028	0.237859	0.0292577	0.713016	-0.0665948	0.929978	0.0315275	0.720817	0.00485372
859	rs29674390	2	79.3434	0.203134	0.02415	0.0380859	0.00351445	0.0710985	0.0102913	0.0680131	-0.00723201	0.278639	0.0335008	0.559585	-0.0560126	0.93438	0.0294763	0.741513	0.00498766
860	rs29556665	2	79.7423	0.203134	0.02415	0.0380859	0.00351445	0.0710985	0.0102913	0.0680131	-0.00723201	0.278639	0.0335008	0.559585	-0.0560126	0.93438	0.0294763	0.741513	0.00498766
861	rs33548881	2	79.795	0.104116	0.0134421	0.110156	0.00952544	0.20908	0.0270614	0.0458461	0.00501629	0.399791	0.0446519	0.71615	-0.0670455	0.83718	0.0771811	0.572524	0.0041285
862	rs28016952	2	79.8054	0.203134	0.02415	0.0380859	0.00351445	0.0710985	0.0102913	0.0680131	-0.00723201	0.278639	0.0335008	0.559585	-0.0560126	0.93438	0.0294763	0.741513	0.00498766
863	rs48292852	2	80.0528	0.203134	0.02415	0.0380859	0.00351445	0.0710985	0.0102913	0.0680131	-0.00723201	0.278639	0.0335008	0.559585	-0.0560126	0.93438	0.0294763	0.741513	0.00498766
864	rs28015970	2	80.0542	0.26535	0.0295618	0.263474	0.0198272	0.119028	0.0161553	0.100202	0.0101745	0.459758	0.0487573	0.332279	-0.036877	0.851449	0.0698416	0.670257	0.00458616
865	rs28324590	2	80.1047	0.26535	0.0295618	0.263474	0.0198272	0.119028	0.0161553	0.100202	0.0101745	0.459758	0.0487573	0.332279	-0.036877	0.851449	0.0698416	0.670257	0.00458616
866	UNC020313672	2	80.149	0.16088	0.0194475	0.362968	0.0257736	0.266018	0.0325215	0.242241	0.02215	0.601761	0.0596331	0.459687	-0.0476955	0.647407	0.188823	0.511407	0.00375256
867	rs28315888	2	80.1731	0.26535	0.0295618	0.263474	0.0198272	0.119028	0.0161553	0.100202	0.0101745	0.459758	0.0487573	0.332279	-0.036877	0.851449	0.0698416	0.670257	0.00458616
868	rs28302337	2	80.2768	0.284925	0.0310378	0.738676	0.0431965	0.40238	0.0443485	0.607448	0.044502	0.548728	0.0555736	0.0265141	0.00373597	0.444606	0.352024	0.465322	0.00354014
869	rs33228399	2	80.3275	0.225056	0.0245966	0.785708	0.0435968	0.487481	0.049297	0.841587	0.0539091	0.457365	0.0470439	0.0444289	0.0059119	0.362808	0.440323	0.644298	0.00439168
870	rs3722345	2	80.6157	0.225056	0.0245966	0.785708	0.0435968	0.487481	0.049297	0.841587	0.0539091	0.457365	0.0470439	0.0444289	0.0059119	0.362808	0.440323	0.644298	0.00439168
871	rs32946035	2	80.6413	0.783709	0.0644065	1.30356	0.061409	0.769331	0.0690589	1.09294	0.0646095	0.933826	0.0786851	0.147299	0.0179575	0.0263407	1.57937	0.496515	0.00362375
872	rs28047718	2	80.7317	0.783709	0.0644065	1.30356	0.061409	0.769331	0.0690589	1.09294	0.0646095	0.933826	0.0786851	0.147299	0.0179575	0.0263407	1.57937	0.496515	0.00362375
873	rs33688548	2	81.022	0.783709	0.0644065	1.30356	0.061409	0.769331	0.0690589	1.09294	0.0646095	0.933826	0.0786851	0.147299	0.0179575	0.0263407	1.57937	0.496515	0.00362375
874	rs29675771	2	82.0471	0.783709	0.0644065	1.30356	0.061409	0.769331	0.0690589	1.09294	0.0646095	0.933826	0.0786851	0.147299	0.0179575	0.0263407	1.57937	0.496515	0.00362375
875	rs3667007	2	82.1061	0.783709	0.0644065	1.30356	0.061409	0.769331	0.0690589	1.09294	0.0646095	0.933826	0.0786851	0.147299	0.0179575	0.0263407	1.57937	0.496515	0.00362375
876	rs13476609	2	83.2525	0.783709	0.0644065	1.30356	0.061409	0.769331	0.0690589	1.09294	0.0646095	0.933826	0.0786851	0.147299	0.0179575	0.0263407	1.57937	0.496515	0.00362375
877	rs28046678	2	83.4132	0.801382	0.0658465	0.949642	0.050179	0.537752	0.0539317	0.884506	0.0565729	1.04979	0.085359	0.0345263	0.00471287	0.0748956	1.12554	0.295716	0.00241525
878	rs28044160	2	85.9481	0.801382	0.0658465	0.949642	0.050179	0.537752	0.0539317	0.884506	0.0565729	1.04979	0.085359	0.0345263	0.00471287	0.0748956	1.12554	0.295716	0.00241525
879	rs49162769	2	86.5165	0.801382	0.0658465	0.949642	0.050179	0.537752	0.0539317	0.884506	0.0565729	1.04979	0.085359	0.0345263	0.00471287	0.0748956	1.12554	0.295716	0.00241525
880	rs33304778	2	86.544	0.801382	0.0658465	0.949642	0.050179	0.537752	0.0539317	0.884506	0.0565729	1.04979	0.085359	0.0345263	0.00471287	0.0748956	1.12554	0.295716	0.00241525
881	rs13476621	2	87.3531	0.801382	0.0658465	0.949642	0.050179	0.537752	0.0539317	0.884506	0.0565729	1.04979	0.085359	0.0345263	0.00471287	0.0748956	1.12554	0.295716	0.00241525
882	rs27444472	2	87.3901	0.801382	0.0658465	0.949642	0.050179	0.537752	0.0539317	0.884506	0.0565729	1.04979	0.085359	0.0345263	0.00471287	0.0748956	1.12554	0.295716	0.00241525
883	rs33245943	2	87.9565	0.801382	0.0658465	0.949642	0.050179	0.537752	0.0539317	0.884506	0.0565729	1.04979	0.085359	0.0345263	0.00471287	0.0748956	1.12554	0.295716	0.00241525
884	rs6314788	2	88.3463	0.801382	0.0658465	0.949642	0.050179	0.537752	0.0539317	0.884506	0.0565729	1.04979	0.085359	0.0345263	0.00471287	0.0748956	1.12554	0.295716	0.00241525
885	rs27383695	2	90.5673	0.801382	0.0658465	0.949642	0.050179	0.537752	0.0539317	0.884506	0.0565729	1.04979	0.085359	0.0345263	0.00471287	0.0748956	1.12554	0.295716	0.00241525
886	rs29769690	2	90.7886	0.801382	0.0658465	0.949642	0.050179	0.537752	0.0539317	0.884506	0.0565729	1.04979	0.085359	0.0345263	0.00471287	0.0748956	1.12554	0.295716	0.00241525
887	rs6230107	2	92.0096	0.801382	0.0658465	0.949642	0.050179	0.537752	0.0539317	0.884506	0.0565729	1.04979	0.085359	0.0345263	0.00471287	0.0748956	1.12554	0.295716	0.00241525
888	rs32951070	2	92.415	0.718786	0.062251	1.04329	0.0544838	0.616368	0.060878	1.034	0.0641341	1.11671	0.0907738	0.000309545	-4.47997e-05	0.0524849	1.27997	0.204291	0.00180796
889	rs27364402	2	93.3212	0.669178	0.0625774	0.761942	0.0465675	0.511571	0.0564499	0.705085	0.0524612	0.715852	0.0707669	0.359412	-0.0412469	0.144215	0.840988	0.151686	-0.0014369
890	rs27415075	2	93.3626	0.669178	0.0625774	0.761942	0.0465675	0.511571	0.0564499	0.705085	0.0524612	0.715852	0.0707669	0.359412	-0.0412469	0.144215	0.840988	0.151686	-0.0014369
891	rs4223268	2	93.4199	0.669178	0.0625774	0.761942	0.0465675	0.511571	0.0564499	0.705085	0.0524612	0.715852	0.0707669	0.359412	-0.0412469	0.144215	0.840988	0.151686	-0.0014369
892	rs33295822	2	93.5022	0.669178	0.0625774	0.761942	0.0465675	0.511571	0.0564499	0.705085	0.0524612	0.715852	0.0707669	0.359412	-0.0412469	0.144215	0.840988	0.151686	-0.0014369
893	rs33268513	2	93.5469	0.669178	0.0625774	0.761942	0.0465675	0.511571	0.0564499	0.705085	0.0524612	0.715852	0.0707669	0.359412	-0.0412469	0.144215	0.840988	0.151686	-0.0014369
894	rs33152575	2	94.0308	0.669178	0.0625774	0.761942	0.0465675	0.511571	0.0564499	0.705085	0.0524612	0.715852	0.0707669	0.359412	-0.0412469	0.144215	0.840988	0.151686	-0.0014369
895	rs33297868	2	94.2849	0.655495	0.0649727	0.455617	0.0336891	0.696304	0.0740872	0.540232	0.0455321	0.719539	0.0744956	0.63131	-0.0659796	0.14839	0.828596	0.201019	-0.00189184
896	rs27365028	2	94.3144	0.655495	0.0649727	0.455617	0.0336891	0.696304	0.0740872	0.540232	0.0455321	0.719539	0.0744956	0.63131	-0.0659796	0.14839	0.828596	0.201019	-0.00189184
897	rs27397133	2	94.3904	0.655495	0.0649727	0.455617	0.0336891	0.696304	0.0740872	0.540232	0.0455321	0.719539	0.0744956	0.63131	-0.0659796	0.14839	0.828596	0.201019	-0.00189184
898	rs6170908	2	94.5378	0.655495	0.0649727	0.455617	0.0336891	0.696304	0.0740872	0.540232	0.0455321	0.719539	0.0744956	0.63131	-0.0659796	0.14839	0.828596	0.201019	-0.00189184
899	rs49936782	2	94.7865	0.655495	0.0649727	0.455617	0.0336891	0.696304	0.0740872	0.540232	0.0455321	0.719539	0.0744956	0.63131	-0.0659796	0.14839	0.828596	0.201019	-0.00189184
900	rs33234734	2	94.7889	0.655495	0.0649727	0.455617	0.0336891	0.696304	0.0740872	0.540232	0.0455321	0.719539	0.0744956	0.63131	-0.0659796	0.14839	0.828596	0.201019	-0.00189184
901	rs27396276	2	96.7594	0.655495	0.0649727	0.455617	0.0336891	0.696304	0.0740872	0.540232	0.0455321	0.719539	0.0744956	0.63131	-0.0659796	0.14839	0.828596	0.201019	-0.00189184
902	rs218638789	2	96.8119	0.655495	0.0649727	0.455617	0.0336891	0.696304	0.0740872	0.540232	0.0455321	0.719539	0.0744956	0.63131	-0.0659796	0.14839	0.828596	0.201019	-0.00189184
903	rs33228571	2	98.1066	0.655495	0.0649727	0.455617	0.0336891	0.696304	0.0740872	0.540232	0.0455321	0.719539	0.0744956	0.63131	-0.0659796	0.14839	0.828596	0.201019	-0.00189184
904	rs29517499	2	98.187	1.33826	0.097418	0.292314	0.0223051	0.436632	0.0492234	0.210824	0.0202704	0.699045	0.0682277	0.554042	-0.0566594	0.179555	0.745802	0.951298	-0.00578527
905	rs27388828	2	98.2587	1.33826	0.097418	0.292314	0.0223051	0.436632	0.0492234	0.210824	0.0202704	0.699045	0.0682277	0.554042	-0.0566594	0.179555	0.745802	0.951298	-0.00578527
906	rs27380548	2	99.1805	1.33826	0.097418	0.292314	0.0223051	0.436632	0.0492234	0.210824	0.0202704	0.699045	0.0682277	0.554042	-0.0566594	0.179555	0.745802	0.951298	-0.00578527
907	rs27380374	2	99.2614	1.33826	0.097418	0.292314	0.0223051	0.436632	0.0492234	0.210824	0.0202704	0.699045	0.0682277	0.554042	-0.0566594	0.179555	0.745802	0.951298	-0.00578527
908	rs27392681	2	99.7945	1.33826	0.097418	0.292314	0.0223051	0.436632	0.0492234	0.210824	0.0202704	0.699045	0.0682277	0.554042	-0.0566594	0.179555	0.745802	0.951298	-0.00578527
909	rs6164718	2	99.8253	1.33826	0.097418	0.292314	0.0223051	0.436632	0.0492234	0.210824	0.0202704	0.699045	0.0682277	0.554042	-0.0566594	0.179555	0.745802	0.951298	-0.00578527
910	rs33426963	2	99.8792	1.33826	0.097418	0.292314	0.0223051	0.436632	0.0492234	0.210824	0.0202704	0.699045	0.0682277	0.554042	-0.0566594	0.179555	0.745802	0.951298	-0.00578527
911	rs52195176	2	100.014	1.16564	0.0901066	0.118927	0.0103841	0.279614	0.0348996	0.0228052	0.00260333	0.735254	0.0707178	0.267409	-0.0323133	0.45166	0.345188	0.357412	-0.00288545
912	rs27365444	2	100.844	1.16564	0.0901066	0.118927	0.0103841	0.279614	0.0348996	0.0228052	0.00260333	0.735254	0.0707178	0.267409	-0.0323133	0.45166	0.345188	0.357412	-0.00288545
913	rs29672796	2	100.919	1.16564	0.0901066	0.118927	0.0103841	0.279614	0.0348996	0.0228052	0.00260333	0.735254	0.0707178	0.267409	-0.0323133	0.45166	0.345188	0.357412	-0.00288545
914	rs48617653	2	100.968	1.16564	0.0901066	0.118927	0.0103841	0.279614	0.0348996	0.0228052	0.00260333	0.735254	0.0707178	0.267409	-0.0323133	0.45166	0.345188	0.357412	-0.00288545
915	rs3721532	2	100.989	1.16021	0.0882191	0.100809	0.00878325	0.146382	0.0197893	0.122015	0.0124185	0.662838	0.0645618	0.377133	-0.0417647	0.459225	0.337974	0.360816	-0.0028606
916	rs27391880	2	101.387	1.16021	0.0882191	0.100809	0.00878325	0.146382	0.0197893	0.122015	0.0124185	0.662838	0.0645618	0.377133	-0.0417647	0.459225	0.337974	0.360816	-0.0028606
917	rs3695682	2	101.72	1.16021	0.0882191	0.100809	0.00878325	0.146382	0.0197893	0.122015	0.0124185	0.662838	0.0645618	0.377133	-0.0417647	0.459225	0.337974	0.360816	-0.0028606
918	rs27391379	2	102.641	1.16021	0.0882191	0.100809	0.00878325	0.146382	0.0197893	0.122015	0.0124185	0.662838	0.0645618	0.377133	-0.0417647	0.459225	0.337974	0.360816	-0.0028606
919	rs6380668	2	102.661	0.922119	0.0811089	0.00122187	0.000124856	0.0229953	0.00372098	0.1569	-0.0164708	0.557929	0.0599044	0.243054	-0.0311323	0.722503	0.14116	0.468556	-0.00366292
920	rs27404923	2	102.731	0.922119	0.0811089	0.00122187	0.000124856	0.0229953	0.00372098	0.1569	-0.0164708	0.557929	0.0599044	0.243054	-0.0311323	0.722503	0.14116	0.468556	-0.00366292
921	rs27389377	2	102.765	0.922119	0.0811089	0.00122187	0.000124856	0.0229953	0.00372098	0.1569	-0.0164708	0.557929	0.0599044	0.243054	-0.0311323	0.722503	0.14116	0.468556	-0.00366292
922	UNCHS006009	2	103.084	0.922119	0.0811089	0.00122187	0.000124856	0.0229953	0.00372098	0.1569	-0.0164708	0.557929	0.0599044	0.243054	-0.0311323	0.722503	0.14116	0.468556	-0.00366292
923	UNC3665445	2	103.193	0.731979	0.0685333	0.159324	-0.0138423	0.0790254	-0.0119167	0.159826	-0.0165266	0.331761	0.0399235	0.179321	-0.0237755	0.818635	0.0869096	0.519209	-0.00394293
924	UNC3666435	2	103.285	0.731979	0.0685333	0.159324	-0.0138423	0.0790254	-0.0119167	0.159826	-0.0165266	0.331761	0.0399235	0.179321	-0.0237755	0.818635	0.0869096	0.519209	-0.00394293
925	UNCHS006018	2	103.323	0.731979	0.0685333	0.159324	-0.0138423	0.0790254	-0.0119167	0.159826	-0.0165266	0.331761	0.0399235	0.179321	-0.0237755	0.818635	0.0869096	0.519209	-0.00394293
926	JAX00098064	2	103.376	0.731979	0.0685333	0.159324	-0.0138423	0.0790254	-0.0119167	0.159826	-0.0165266	0.331761	0.0399235	0.179321	-0.0237755	0.818635	0.0869096	0.519209	-0.00394293
927	rs13469470	2	103.451	0.731979	0.0685333	0.159324	-0.0138423	0.0790254	-0.0119167	0.159826	-0.0165266	0.331761	0.0399235	0.179321	-0.0237755	0.818635	0.0869096	0.519209	-0.00394293
928	rs45636082	2	104.018	0.731979	0.0685333	0.159324	-0.0138423	0.0790254	-0.0119167	0.159826	-0.0165266	0.331761	0.0399235	0.179321	-0.0237755	0.818635	0.0869096	0.519209	-0.00394293
929	rs13476676	2	104.1	0.731979	0.0685333	0.159324	-0.0138423	0.0790254	-0.0119167	0.159826	-0.0165266	0.331761	0.0399235	0.179321	-0.0237755	0.818635	0.0869096	0.519209	-0.00394293
930	rs45725414	2	104.215	0.731979	0.0685333	0.159324	-0.0138423	0.0790254	-0.0119167	0.159826	-0.0165266	0.331761	0.0399235	0.179321	-0.0237755	0.818635	0.0869096	0.519209	-0.00394293
931	rs33338462	2	104.416	0.731979	0.0685333	0.159324	-0.0138423	0.0790254	-0.0119167	0.159826	-0.0165266	0.331761	0.0399235	0.179321	-0.0237755	0.818635	0.0869096	0.519209	-0.00394293
932	rs48168187	2	104.42	0.731979	0.0685333	0.159324	-0.0138423	0.0790254	-0.0119167	0.159826	-0.0165266	0.331761	0.0399235	0.179321	-0.0237755	0.818635	0.0869096	0.519209	-0.00394293
933	rs6256701	2	104.427	0.731979	0.0685333	0.159324	-0.0138423	0.0790254	-0.0119167	0.159826	-0.0165266	0.331761	0.0399235	0.179321	-0.0237755	0.818635	0.0869096	0.519209	-0.00394293
934	rs27443112	2	106.11	0.731979	0.0685333	0.159324	-0.0138423	0.0790254	-0.0119167	0.159826	-0.0165266	0.331761	0.0399235	0.179321	-0.0237755	0.818635	0.0869096	0.519209	-0.00394293
935	rs29504849	2	106.28	0.731979	0.0685333	0.159324	-0.0138423	0.0790254	-0.0119167	0.159826	-0.0165266	0.331761	0.0399235	0.179321	-0.0237755	0.818635	0.0869096	0.519209	-0.00394293
936	rs49154519	2	106.496	0.731979	0.0685333	0.159324	-0.0138423	0.0790254	-0.0119167	0.159826	-0.0165266	0.331761	0.0399235	0.179321	-0.0237755	0.818635	0.0869096	0.519209	-0.00394293
937	rs27431060	2	106.526	0.731979	0.0685333	0.159324	-0.0138423	0.0790254	-0.0119167	0.159826	-0.0165266	0.331761	0.0399235	0.179321	-0.0237755	0.818635	0.0869096	0.519209	-0.00394293
938	rs6323360	2	106.598	0.731979	0.0685333	0.159324	-0.0138423	0.0790254	-0.0119167	0.159826	-0.0165266	0.331761	0.0399235	0.179321	-0.0237755	0.818635	0.0869096	0.519209	-0.00394293
939	rs27446983	2	106.665	0.731979	0.0685333	0.159324	-0.0138423	0.0790254	-0.0119167	0.159826	-0.0165266	0.331761	0.0399235	0.179321	-0.0237755	0.818635	0.0869096	0.519209	-0.00394293
940	rs50548599	2	106.696	0.731979	0.0685333	0.159324	-0.0138423	0.0790254	-0.0119167	0.159826	-0.0165266	0.331761	0.0399235	0.179321	-0.0237755	0.818635	0.0869096	0.519209	-0.00394293
941	rs33188980	2	107.075	0.731979	0.0685333	0.159324	-0.0138423	0.0790254	-0.0119167	0.159826	-0.0165266	0.331761	0.0399235	0.179321	-0.0237755	0.818635	0.0869096	0.519209	-0.00394293
942	rs27472920	2	107.154	0.670533	0.0625578	0.606123	-0.0390213	0.365277	-0.043261	0.75642	-0.0540575	0.243295	0.0301695	0.691356	-0.0665747	0.222901	0.651888	0.306054	-0.00256049
943	rs6242654	2	107.241	0.670533	0.0625578	0.606123	-0.0390213	0.365277	-0.043261	0.75642	-0.0540575	0.243295	0.0301695	0.691356	-0.0665747	0.222901	0.651888	0.306054	-0.00256049
944	rs13476689	2	107.465	0.670533	0.0625578	0.606123	-0.0390213	0.365277	-0.043261	0.75642	-0.0540575	0.243295	0.0301695	0.691356	-0.0665747	0.222901	0.651888	0.306054	-0.00256049
945	rs27469498	2	108.091	0.670533	0.0625578	0.606123	-0.0390213	0.365277	-0.043261	0.75642	-0.0540575	0.243295	0.0301695	0.691356	-0.0665747	0.222901	0.651888	0.306054	-0.00256049
946	rs33051394	2	108.098	0.670533	0.0625578	0.606123	-0.0390213	0.365277	-0.043261	0.75642	-0.0540575	0.243295	0.0301695	0.691356	-0.0665747	0.222901	0.651888	0.306054	-0.00256049
947	rs27508892	2	108.355	0.670533	0.0625578	0.606123	-0.0390213	0.365277	-0.043261	0.75642	-0.0540575	0.243295	0.0301695	0.691356	-0.0665747	0.222901	0.651888	0.306054	-0.00256049
948	rs33591583	2	108.777	0.670533	0.0625578	0.606123	-0.0390213	0.365277	-0.043261	0.75642	-0.0540575	0.243295	0.0301695	0.691356	-0.0665747	0.222901	0.651888	0.306054	-0.00256049
949	rs27493247	2	109.524	0.670533	0.0625578	0.606123	-0.0390213	0.365277	-0.043261	0.75642	-0.0540575	0.243295	0.0301695	0.691356	-0.0665747	0.222901	0.651888	0.306054	-0.00256049
950	rs27474179	2	109.72	0.670533	0.0625578	0.606123	-0.0390213	0.365277	-0.043261	0.75642	-0.0540575	0.243295	0.0301695	0.691356	-0.0665747	0.222901	0.651888	0.306054	-0.00256049
951	rs27524311	2	109.734	0.670533	0.0625578	0.606123	-0.0390213	0.365277	-0.043261	0.75642	-0.0540575	0.243295	0.0301695	0.691356	-0.0665747	0.222901	0.651888	0.306054	-0.00256049
952	rs6208879	2	109.783	0.670533	0.0625578	0.606123	-0.0390213	0.365277	-0.043261	0.75642	-0.0540575	0.243295	0.0301695	0.691356	-0.0665747	0.222901	0.651888	0.306054	-0.00256049
953	rs46123095	2	109.954	0.670533	0.0625578	0.606123	-0.0390213	0.365277	-0.043261	0.75642	-0.0540575	0.243295	0.0301695	0.691356	-0.0665747	0.222901	0.651888	0.306054	-0.00256049
954	rs6318808	2	109.99	0.670533	0.0625578	0.606123	-0.0390213	0.365277	-0.043261	0.75642	-0.0540575	0.243295	0.0301695	0.691356	-0.0665747	0.222901	0.651888	0.306054	-0.00256049
955	rs33662570	2	110.047	0.670533	0.0625578	0.606123	-0.0390213	0.365277	-0.043261	0.75642	-0.0540575	0.243295	0.0301695	0.691356	-0.0665747	0.222901	0.651888	0.306054	-0.00256049
956	UNC020317359	2	110.413	0.670533	0.0625578	0.606123	-0.0390213	0.365277	-0.043261	0.75642	-0.0540575	0.243295	0.0301695	0.691356	-0.0665747	0.222901	0.651888	0.306054	-0.00256049
957	rs29716654	2	110.518	0.670533	0.0625578	0.606123	-0.0390213	0.365277	-0.043261	0.75642	-0.0540575	0.243295	0.0301695	0.691356	-0.0665747	0.222901	0.651888	0.306054	-0.00256049
958	rs33491937	2	110.704	0.670533	0.0625578	0.606123	-0.0390213	0.365277	-0.043261	0.75642	-0.0540575	0.243295	0.0301695	0.691356	-0.0665747	0.222901	0.651888	0.306054	-0.00256049
959	rs33283452	2	112.09	0.670533	0.0625578	0.606123	-0.0390213	0.365277	-0.043261	0.75642	-0.0540575	0.243295	0.0301695	0.691356	-0.0665747	0.222901	0.651888	0.306054	-0.00256049
960	rs50748091	2	112.244	0.670533	0.0625578	0.606123	-0.0390213	0.365277	-0.043261	0.75642	-0.0540575	0.243295	0.0301695	0.691356	-0.0665747	0.222901	0.651888	0.306054	-0.00256049
961	rs51927292	2	112.276	0.806525	0.0713284	0.371154	-0.0271483	0.217805	-0.0286343	0.435176	-0.0364713	0.220818	0.0279004	1.11707	-0.0922648	0.264529	0.577527	0.833849	-0.00536838
962	rs52710187	2	112.28	0.806525	0.0713284	0.371154	-0.0271483	0.217805	-0.0286343	0.435176	-0.0364713	0.220818	0.0279004	1.11707	-0.0922648	0.264529	0.577527	0.833849	-0.00536838
963	rs3681694	2	112.285	0.806525	0.0713284	0.371154	-0.0271483	0.217805	-0.0286343	0.435176	-0.0364713	0.220818	0.0279004	1.11707	-0.0922648	0.264529	0.577527	0.833849	-0.00536838
964	rs27506268	2	112.458	0.806525	0.0713284	0.371154	-0.0271483	0.217805	-0.0286343	0.435176	-0.0364713	0.220818	0.0279004	1.11707	-0.0922648	0.264529	0.577527	0.833849	-0.00536838
965	rs29538830	2	113.346	0.806525	0.0713284	0.371154	-0.0271483	0.217805	-0.0286343	0.435176	-0.0364713	0.220818	0.0279004	1.11707	-0.0922648	0.264529	0.577527	0.833849	-0.00536838
966	rs29969758	2	113.445	0.770032	0.0675346	0.440533	-0.0302347	0.333069	-0.0394427	0.467518	-0.0375527	0.128191	0.0170799	1.41557	-0.10408	0.174828	0.757388	1.14202	-0.00653291
967	rs29556426	2	113.607	0.770032	0.0675346	0.440533	-0.0302347	0.333069	-0.0394427	0.467518	-0.0375527	0.128191	0.0170799	1.41557	-0.10408	0.174828	0.757388	1.14202	-0.00653291
968	rs27505237	2	113.631	0.770032	0.0675346	0.440533	-0.0302347	0.333069	-0.0394427	0.467518	-0.0375527	0.128191	0.0170799	1.41557	-0.10408	0.174828	0.757388	1.14202	-0.00653291
969	rs27491076	2	113.784	0.770032	0.0675346	0.440533	-0.0302347	0.333069	-0.0394427	0.467518	-0.0375527	0.128191	0.0170799	1.41557	-0.10408	0.174828	0.757388	1.14202	-0.00653291
970	rs28271895	2	114.159	0.770032	0.0675346	0.440533	-0.0302347	0.333069	-0.0394427	0.467518	-0.0375527	0.128191	0.0170799	1.41557	-0.10408	0.174828	0.757388	1.14202	-0.00653291
971	rs13476709	2	114.197	0.579178	0.0541423	0.554483	-0.0352601	0.74698	-0.0703074	0.64757	-0.0467726	0.0648748	-0.00901458	1.46716	-0.104182	0.0960792	1.01737	1.75516	-0.00833272
972	rs27455097	2	114.317	0.579178	0.0541423	0.554483	-0.0352601	0.74698	-0.0703074	0.64757	-0.0467726	0.0648748	-0.00901458	1.46716	-0.104182	0.0960792	1.01737	1.75516	-0.00833272
973	rs33376011	2	114.321	0.579178	0.0541423	0.554483	-0.0352601	0.74698	-0.0703074	0.64757	-0.0467726	0.0648748	-0.00901458	1.46716	-0.104182	0.0960792	1.01737	1.75516	-0.00833272
974	rs50126298	2	115.34	0.579178	0.0541423	0.554483	-0.0352601	0.74698	-0.0703074	0.64757	-0.0467726	0.0648748	-0.00901458	1.46716	-0.104182	0.0960792	1.01737	1.75516	-0.00833272
975	rs27455574	2	115.411	0.579178	0.0541423	0.554483	-0.0352601	0.74698	-0.0703074	0.64757	-0.0467726	0.0648748	-0.00901458	1.46716	-0.104182	0.0960792	1.01737	1.75516	-0.00833272
976	rs33213953	2	115.499	0.579178	0.0541423	0.554483	-0.0352601	0.74698	-0.0703074	0.64757	-0.0467726	0.0648748	-0.00901458	1.46716	-0.104182	0.0960792	1.01737	1.75516	-0.00833272
977	rs27426466	2	115.506	0.208407	0.0235936	0.767249	-0.0435051	0.938277	-0.0802701	0.826983	-0.0541594	0.344465	-0.0379952	2.02	-0.123131	0.0236869	1.62549	1.50042	-0.00750595
978	rs27426815	2	115.879	0.208407	0.0235936	0.767249	-0.0435051	0.938277	-0.0802701	0.826983	-0.0541594	0.344465	-0.0379952	2.02	-0.123131	0.0236869	1.62549	1.50042	-0.00750595
979	rs3708146	2	116.006	0.208407	0.0235936	0.767249	-0.0435051	0.938277	-0.0802701	0.826983	-0.0541594	0.344465	-0.0379952	2.02	-0.123131	0.0236869	1.62549	1.50042	-0.00750595
980	rs27434419	2	116.477	0.208407	0.0235936	0.767249	-0.0435051	0.938277	-0.0802701	0.826983	-0.0541594	0.344465	-0.0379952	2.02	-0.123131	0.0236869	1.62549	1.50042	-0.00750595
981	rs6381234	2	116.722	0.144081	-0.0170125	1.27312	-0.0599914	1.31644	-0.0982193	1.06517	-0.0631913	0.761454	-0.0679195	2.35017	-0.132821	0.00147312	2.83176	1.23721	-0.00664844
982	rs32914740	2	117	0.218596	-0.0246068	1.68964	-0.0719998	1.6559	-0.113807	1.54769	-0.0805538	0.737187	-0.067034	1.74895	-0.113887	0.000470039	3.32787	0.61126	-0.00415545
983	rs13476723	2	117.293	0.218596	-0.0246068	1.68964	-0.0719998	1.6559	-0.113807	1.54769	-0.0805538	0.737187	-0.067034	1.74895	-0.113887	0.000470039	3.32787	0.61126	-0.00415545
984	rs27456955	2	117.683	0.218596	-0.0246068	1.68964	-0.0719998	1.6559	-0.113807	1.54769	-0.0805538	0.737187	-0.067034	1.74895	-0.113887	0.000470039	3.32787	0.61126	-0.00415545
985	rs27440124	2	118.865	0.218596	-0.0246068	1.68964	-0.0719998	1.6559	-0.113807	1.54769	-0.0805538	0.737187	-0.067034	1.74895	-0.113887	0.000470039	3.32787	0.61126	-0.00415545
986	rs27440098	2	118.881	0.218596	-0.0246068	1.68964	-0.0719998	1.6559	-0.113807	1.54769	-0.0805538	0.737187	-0.067034	1.74895	-0.113887	0.000470039	3.32787	0.61126	-0.00415545
987	rs33267022	2	118.906	0.28072	-0.0296885	1.70187	-0.0712292	1.60263	-0.109793	1.08527	-0.0635912	1.12545	-0.0875608	1.72068	-0.110907	0.000539106	3.26833	0.466431	-0.0033635
988	rs27457781	2	120.034	0.28072	-0.0296885	1.70187	-0.0712292	1.60263	-0.109793	1.08527	-0.0635912	1.12545	-0.0875608	1.72068	-0.110907	0.000539106	3.26833	0.466431	-0.0033635
989	rs46878901	2	120.096	0.28072	-0.0296885	1.70187	-0.0712292	1.60263	-0.109793	1.08527	-0.0635912	1.12545	-0.0875608	1.72068	-0.110907	0.000539106	3.26833	0.466431	-0.0033635
990	rs32933236	2	120.375	0.28072	-0.0296885	1.70187	-0.0712292	1.60263	-0.109793	1.08527	-0.0635912	1.12545	-0.0875608	1.72068	-0.110907	0.000539106	3.26833	0.466431	-0.0033635
991	rs27422339	2	120.525	0.28072	-0.0296885	1.70187	-0.0712292	1.60263	-0.109793	1.08527	-0.0635912	1.12545	-0.0875608	1.72068	-0.110907	0.000539106	3.26833	0.466431	-0.0033635
992	rs27425113	2	121.558	0.28072	-0.0296885	1.70187	-0.0712292	1.60263	-0.109793	1.08527	-0.0635912	1.12545	-0.0875608	1.72068	-0.110907	0.000539106	3.26833	0.466431	-0.0033635
993	rs13476740	2	121.587	0.28072	-0.0296885	1.70187	-0.0712292	1.60263	-0.109793	1.08527	-0.0635912	1.12545	-0.0875608	1.72068	-0.110907	0.000539106	3.26833	0.466431	-0.0033635
994	UNC020174288	2	122.4	0.167074	-0.0191638	1.70829	-0.070992	1.46636	-0.103526	1.17041	-0.0664826	1.27201	-0.0948668	1.71582	-0.110442	0.000554441	3.25614	0.491469	-0.00351528
995	rs3686617	2	122.558	0.0671669	-0.00815678	1.63473	-0.0667379	1.27004	-0.0914302	1.20007	-0.0652551	1.36985	-0.0968262	1.62801	-0.103582	0.000961608	3.017	0.500653	-0.00349317
996	rs33755694	2	123.334	0.0671669	-0.00815678	1.63473	-0.0667379	1.27004	-0.0914302	1.20007	-0.0652551	1.36985	-0.0968262	1.62801	-0.103582	0.000961608	3.017	0.500653	-0.00349317
997	rs33113924	2	123.528	0.0671669	-0.00815678	1.63473	-0.0667379	1.27004	-0.0914302	1.20007	-0.0652551	1.36985	-0.0968262	1.62801	-0.103582	0.000961608	3.017	0.500653	-0.00349317
998	rs13476750	2	123.655	0.0671669	-0.00815678	1.63473	-0.0667379	1.27004	-0.0914302	1.20007	-0.0652551	1.36985	-0.0968262	1.62801	-0.103582	0.000961608	3.017	0.500653	-0.00349317
999	rs27468826	2	125.337	0.0671669	-0.00815678	1.63473	-0.0667379	1.27004	-0.0914302	1.20007	-0.0652551	1.36985	-0.0968262	1.62801	-0.103582	0.000961608	3.017	0.500653	-0.00349317
1000	rs46602832	2	125.441	0.0735202	-0.00900191	1.65326	-0.068068	1.17404	-0.0883686	1.35721	-0.0714858	1.35959	-0.0974561	1.54973	-0.102039	0.000965627	3.01519	0.502508	-0.00353984
1001	rs6374387	2	125.479	0.0784552	-0.00951523	1.62133	-0.0668839	1.04543	-0.0816552	1.48125	-0.0750113	1.31418	-0.0948267	1.42626	-0.0965253	0.00134316	2.87187	0.494859	-0.00348564
1002	rs47779992	2	125.803	0.0784552	-0.00951523	1.62133	-0.0668839	1.04543	-0.0816552	1.48125	-0.0750113	1.31418	-0.0948267	1.42626	-0.0965253	0.00134316	2.87187	0.494859	-0.00348564
1003	rs3708635	2	125.879	0.0784552	-0.00951523	1.62133	-0.0668839	1.04543	-0.0816552	1.48125	-0.0750113	1.31418	-0.0948267	1.42626	-0.0965253	0.00134316	2.87187	0.494859	-0.00348564
1004	rs27434257	2	127.231	0.0784552	-0.00951523	1.62133	-0.0668839	1.04543	-0.0816552	1.48125	-0.0750113	1.31418	-0.0948267	1.42626	-0.0965253	0.00134316	2.87187	0.494859	-0.00348564
1005	rs29575143	2	127.239	0.0784552	-0.00951523	1.62133	-0.0668839	1.04543	-0.0816552	1.48125	-0.0750113	1.31418	-0.0948267	1.42626	-0.0965253	0.00134316	2.87187	0.494859	-0.00348564
1006	rs27446664	2	128.043	0.0784552	-0.00951523	1.62133	-0.0668839	1.04543	-0.0816552	1.48125	-0.0750113	1.31418	-0.0948267	1.42626	-0.0965253	0.00134316	2.87187	0.494859	-0.00348564
1007	rs33446094	2	128.094	0.0784552	-0.00951523	1.62133	-0.0668839	1.04543	-0.0816552	1.48125	-0.0750113	1.31418	-0.0948267	1.42626	-0.0965253	0.00134316	2.87187	0.494859	-0.00348564
1008	rs33001215	2	128.177	0.0784552	-0.00951523	1.62133	-0.0668839	1.04543	-0.0816552	1.48125	-0.0750113	1.31418	-0.0948267	1.42626	-0.0965253	0.00134316	2.87187	0.494859	-0.00348564
1009	rs45841265	2	128.179	0.0784552	-0.00951523	1.62133	-0.0668839	1.04543	-0.0816552	1.48125	-0.0750113	1.31418	-0.0948267	1.42626	-0.0965253	0.00134316	2.87187	0.494859	-0.00348564
1010	rs27446097	2	128.321	0.0784552	-0.00951523	1.62133	-0.0668839	1.04543	-0.0816552	1.48125	-0.0750113	1.31418	-0.0948267	1.42626	-0.0965253	0.00134316	2.87187	0.494859	-0.00348564
1011	rs6411422	2	128.373	0.0784552	-0.00951523	1.62133	-0.0668839	1.04543	-0.0816552	1.48125	-0.0750113	1.31418	-0.0948267	1.42626	-0.0965253	0.00134316	2.87187	0.494859	-0.00348564
1012	rs27430758	2	128.394	0.0784552	-0.00951523	1.62133	-0.0668839	1.04543	-0.0816552	1.48125	-0.0750113	1.31418	-0.0948267	1.42626	-0.0965253	0.00134316	2.87187	0.494859	-0.00348564
1013	rs33374230	2	129.035	0.0784552	-0.00951523	1.62133	-0.0668839	1.04543	-0.0816552	1.48125	-0.0750113	1.31418	-0.0948267	1.42626	-0.0965253	0.00134316	2.87187	0.494859	-0.00348564
1014	rs3662407	2	129.223	0.00333412	-0.000436169	1.50191	-0.0636002	1.34394	-0.0963383	1.58612	-0.0784119	1.31369	-0.0948771	1.37527	-0.0938904	0.00103693	2.98425	0.385556	-0.00287629
1015	rs8264884	2	131.056	0.00333412	-0.000436169	1.50191	-0.0636002	1.34394	-0.0963383	1.58612	-0.0784119	1.31369	-0.0948771	1.37527	-0.0938904	0.00103693	2.98425	0.385556	-0.00287629
1016	rs32869127	2	131.063	0.00333412	-0.000436169	1.50191	-0.0636002	1.34394	-0.0963383	1.58612	-0.0784119	1.31369	-0.0948771	1.37527	-0.0938904	0.00103693	2.98425	0.385556	-0.00287629
1017	rs27259268	2	131.452	0.00333412	-0.000436169	1.50191	-0.0636002	1.34394	-0.0963383	1.58612	-0.0784119	1.31369	-0.0948771	1.37527	-0.0938904	0.00103693	2.98425	0.385556	-0.00287629
1018	rs27259196	2	131.486	0.00333412	-0.000436169	1.50191	-0.0636002	1.34394	-0.0963383	1.58612	-0.0784119	1.31369	-0.0948771	1.37527	-0.0938904	0.00103693	2.98425	0.385556	-0.00287629
1019	rs27244868	2	131.557	0.148345	0.0166273	1.46544	-0.0613112	0.927384	-0.0747645	1.54197	-0.0757264	1.16508	-0.0859929	1.31519	-0.0894844	0.00258205	2.58804	0.476601	-0.00333066
1020	rs51331125	2	131.797	0.148345	0.0166273	1.46544	-0.0613112	0.927384	-0.0747645	1.54197	-0.0757264	1.16508	-0.0859929	1.31519	-0.0894844	0.00258205	2.58804	0.476601	-0.00333066
1021	rs4223510	2	131.854	0.148345	0.0166273	1.46544	-0.0613112	0.927384	-0.0747645	1.54197	-0.0757264	1.16508	-0.0859929	1.31519	-0.0894844	0.00258205	2.58804	0.476601	-0.00333066
1022	rs48248491	2	134.462	0.150362	0.0175187	1.3541	-0.0609018	0.59526	-0.0574797	1.24877	-0.0693196	0.675223	-0.0618842	1.319	-0.0935675	0.0168145	1.77432	0.17316	-0.00151358
1023	rs13476784	2	134.519	0.0559789	0.00713793	1.35883	-0.0616756	0.687585	-0.0642381	1.16973	-0.0671003	0.573474	-0.0551346	1.33383	-0.0948906	0.0213034	1.67155	0.157497	-0.00138999
1024	rs27231678	2	134.801	0.124684	-0.0149654	1.65628	-0.0697009	0.989577	-0.0827194	1.35878	-0.0740377	0.755412	-0.0674211	1.50437	-0.102579	0.00340814	2.46748	0.00807213	8.26e-05
1025	rs27285185	2	134.897	0.124684	-0.0149654	1.65628	-0.0697009	0.989577	-0.0827194	1.35878	-0.0740377	0.755412	-0.0674211	1.50437	-0.102579	0.00340814	2.46748	0.00807213	8.26e-05
1026	rs33742727	2	134.911	0.124684	-0.0149654	1.65628	-0.0697009	0.989577	-0.0827194	1.35878	-0.0740377	0.755412	-0.0674211	1.50437	-0.102579	0.00340814	2.46748	0.00807213	8.26e-05
1027	rs27268196	2	134.932	0.124684	-0.0149654	1.65628	-0.0697009	0.989577	-0.0827194	1.35878	-0.0740377	0.755412	-0.0674211	1.50437	-0.102579	0.00340814	2.46748	0.00807213	8.26e-05
1028	rs27268155	2	134.945	0.124684	-0.0149654	1.65628	-0.0697009	0.989577	-0.0827194	1.35878	-0.0740377	0.755412	-0.0674211	1.50437	-0.102579	0.00340814	2.46748	0.00807213	8.26e-05
1029	rs51176438	2	134.952	0.124684	-0.0149654	1.65628	-0.0697009	0.989577	-0.0827194	1.35878	-0.0740377	0.755412	-0.0674211	1.50437	-0.102579	0.00340814	2.46748	0.00807213	8.26e-05
1030	rs27252871	2	135.859	0.0559789	0.00713793	1.35883	-0.0616756	0.687585	-0.0642381	1.16973	-0.0671003	0.573474	-0.0551346	1.33383	-0.0948906	0.0213034	1.67155	0.157497	-0.00138999
1031	rs29523263	2	135.88	0.0559789	0.00713793	1.35883	-0.0616756	0.687585	-0.0642381	1.16973	-0.0671003	0.573474	-0.0551346	1.33383	-0.0948906	0.0213034	1.67155	0.157497	-0.00138999
1032	rs29716787	2	135.933	0.0559789	0.00713793	1.35883	-0.0616756	0.687585	-0.0642381	1.16973	-0.0671003	0.573474	-0.0551346	1.33383	-0.0948906	0.0213034	1.67155	0.157497	-0.00138999
1033	rs218995235	2	136.127	0.0863851	-0.0107503	1.57128	-0.0681046	1.07397	-0.087615	1.64804	-0.0836143	0.687975	-0.0629982	0.989136	-0.0786304	0.00573581	2.2414	0.0630581	-0.000605273
1034	rs27237140	2	136.128	0.110686	-0.0136129	1.87511	-0.0763799	1.32315	-0.10128	1.76975	-0.0880719	0.885371	-0.0757843	1.16732	-0.0885659	0.0010248	2.98936	0.0515806	-0.000503783
1035	rs33733849	2	136.129	0.110686	-0.0136129	1.87511	-0.0763799	1.32315	-0.10128	1.76975	-0.0880719	0.885371	-0.0757843	1.16732	-0.0885659	0.0010248	2.98936	0.0515806	-0.000503783
1036	rs13476793	2	136.427	0.0337589	0.00441432	2.18541	-0.0824808	1.1409	-0.090771	1.43405	-0.0764459	1.11418	-0.0874516	0.712364	-0.062818	0.00235558	2.6279	0.0838679	0.000785717
1037	rs27257116	2	136.446	0.0337589	0.00441432	2.18541	-0.0824808	1.1409	-0.090771	1.43405	-0.0764459	1.11418	-0.0874516	0.712364	-0.062818	0.00235558	2.6279	0.0838679	0.000785717
1038	Affy_PC2_137	2	137	0.260493	-0.0287972	1.13925	-0.0576473	0.926632	-0.0815498	1.26857	-0.0733451	0.404761	-0.0436787	0.589749	-0.0567041	0.048435	1.31484	0.162268	0.00142364
1039	Affy_PC2_138	2	138.5	0.215343	-0.0247469	1.00433	-0.0534804	0.929017	-0.0821673	0.952664	-0.0612429	0.445841	-0.0474952	0.852384	-0.0738768	0.0623102	1.20544	0.00882338	9.16e-05
1040	rs13476805	2	139.724	0.162974	-0.0187077	0.817625	-0.0446746	0.868427	-0.0752319	0.635913	-0.0443912	0.458853	-0.0466863	1.08434	-0.083091	0.0999758	1.00011	0.1331	-0.0011918
1041	rs27204240	2	139.879	0.162974	-0.0187077	0.817625	-0.0446746	0.868427	-0.0752319	0.635913	-0.0443912	0.458853	-0.0466863	1.08434	-0.083091	0.0999758	1.00011	0.1331	-0.0011918
1042	rs33378223	2	139.931	0.162974	-0.0187077	0.817625	-0.0446746	0.868427	-0.0752319	0.635913	-0.0443912	0.458853	-0.0466863	1.08434	-0.083091	0.0999758	1.00011	0.1331	-0.0011918
1043	rs27187790	2	140.974	0.162974	-0.0187077	0.817625	-0.0446746	0.868427	-0.0752319	0.635913	-0.0443912	0.458853	-0.0466863	1.08434	-0.083091	0.0999758	1.00011	0.1331	-0.0011918
1044	rs46462024	2	141.168	0.162974	-0.0187077	0.817625	-0.0446746	0.868427	-0.0752319	0.635913	-0.0443912	0.458853	-0.0466863	1.08434	-0.083091	0.0999758	1.00011	0.1331	-0.0011918
1045	rs27218368	2	142.433	0.162974	-0.0187077	0.817625	-0.0446746	0.868427	-0.0752319	0.635913	-0.0443912	0.458853	-0.0466863	1.08434	-0.083091	0.0999758	1.00011	0.1331	-0.0011918
1046	rs29503489	2	142.436	0.162974	-0.0187077	0.817625	-0.0446746	0.868427	-0.0752319	0.635913	-0.0443912	0.458853	-0.0466863	1.08434	-0.083091	0.0999758	1.00011	0.1331	-0.0011918
1047	rs27236316	2	142.621	0.213442	-0.0237754	0.869833	-0.0469882	0.753414	-0.0687821	0.606695	-0.0432673	0.461454	-0.0471449	1.12047	-0.0857147	0.100325	0.998592	0.174448	-0.00151494
1048	rs6331493	2	142.704	0.264505	-0.0283324	0.910172	-0.0483213	0.631706	-0.0603827	0.567723	-0.0410396	0.459072	-0.0468296	1.1377	-0.0863552	0.107262	0.969553	0.21718	-0.00182071
1049	rs49319499	2	143.811	0.264505	-0.0283324	0.910172	-0.0483213	0.631706	-0.0603827	0.567723	-0.0410396	0.459072	-0.0468296	1.1377	-0.0863552	0.107262	0.969553	0.21718	-0.00182071
1050	rs16804133	2	143.813	0.264505	-0.0283324	0.910172	-0.0483213	0.631706	-0.0603827	0.567723	-0.0410396	0.459072	-0.0468296	1.1377	-0.0863552	0.107262	0.969553	0.21718	-0.00182071
1051	rs27248595	2	144.089	0.264505	-0.0283324	0.910172	-0.0483213	0.631706	-0.0603827	0.567723	-0.0410396	0.459072	-0.0468296	1.1377	-0.0863552	0.107262	0.969553	0.21718	-0.00182071
1052	rs27248575	2	144.092	0.0101888	-0.00139021	0.686981	-0.0406257	0.471379	-0.0498177	0.416326	-0.033306	0.150068	-0.0190674	0.744361	-0.0664011	0.493508	0.306705	0.310129	-0.00248569
1053	rs27280330	2	145.189	0.0101888	-0.00139021	0.686981	-0.0406257	0.471379	-0.0498177	0.416326	-0.033306	0.150068	-0.0190674	0.744361	-0.0664011	0.493508	0.306705	0.310129	-0.00248569
1054	rs3022909	2	145.282	0.0101888	-0.00139021	0.686981	-0.0406257	0.471379	-0.0498177	0.416326	-0.033306	0.150068	-0.0190674	0.744361	-0.0664011	0.493508	0.306705	0.310129	-0.00248569
1055	rs30563659	2	146.144	0.0101888	-0.00139021	0.686981	-0.0406257	0.471379	-0.0498177	0.416326	-0.033306	0.150068	-0.0190674	0.744361	-0.0664011	0.493508	0.306705	0.310129	-0.00248569
1056	rs51443842	2	147.565	0.0101888	-0.00139021	0.686981	-0.0406257	0.471379	-0.0498177	0.416326	-0.033306	0.150068	-0.0190674	0.744361	-0.0664011	0.493508	0.306705	0.310129	-0.00248569
1057	rs233901721	2	147.679	0.0101888	-0.00139021	0.686981	-0.0406257	0.471379	-0.0498177	0.416326	-0.033306	0.150068	-0.0190674	0.744361	-0.0664011	0.493508	0.306705	0.310129	-0.00248569
1058	rs29522111	2	147.82	0.0101888	-0.00139021	0.686981	-0.0406257	0.471379	-0.0498177	0.416326	-0.033306	0.150068	-0.0190674	0.744361	-0.0664011	0.493508	0.306705	0.310129	-0.00248569
1059	rs228105531	2	148.046	0.0101888	-0.00139021	0.686981	-0.0406257	0.471379	-0.0498177	0.416326	-0.033306	0.150068	-0.0190674	0.744361	-0.0664011	0.493508	0.306705	0.310129	-0.00248569
1060	rs6209325	2	148.055	0.0101888	-0.00139021	0.686981	-0.0406257	0.471379	-0.0498177	0.416326	-0.033306	0.150068	-0.0190674	0.744361	-0.0664011	0.493508	0.306705	0.310129	-0.00248569
1061	rs28225085	2	148.73	0.0101888	-0.00139021	0.686981	-0.0406257	0.471379	-0.0498177	0.416326	-0.033306	0.150068	-0.0190674	0.744361	-0.0664011	0.493508	0.306705	0.310129	-0.00248569
1062	rs28210841	2	148.751	0.0101888	-0.00139021	0.686981	-0.0406257	0.471379	-0.0498177	0.416326	-0.033306	0.150068	-0.0190674	0.744361	-0.0664011	0.493508	0.306705	0.310129	-0.00248569
1063	rs29541164	2	149.64	0.0101888	-0.00139021	0.686981	-0.0406257	0.471379	-0.0498177	0.416326	-0.033306	0.150068	-0.0190674	0.744361	-0.0664011	0.493508	0.306705	0.310129	-0.00248569
1064	rs6206791	2	149.666	0.020098	-0.00272472	0.665291	-0.039882	0.322589	-0.037261	0.581091	-0.0428807	0.118933	-0.0156129	0.597556	-0.0570471	0.561953	0.2503	0.30563	-0.0024745
1065	rs27352250	2	150.659	0.020098	-0.00272472	0.665291	-0.039882	0.322589	-0.037261	0.581091	-0.0428807	0.118933	-0.0156129	0.597556	-0.0570471	0.561953	0.2503	0.30563	-0.0024745
1066	rs33769134	2	152.615	0.020098	-0.00272472	0.665291	-0.039882	0.322589	-0.037261	0.581091	-0.0428807	0.118933	-0.0156129	0.597556	-0.0570471	0.561953	0.2503	0.30563	-0.0024745
1067	rs47603435	2	152.616	0.020098	-0.00272472	0.665291	-0.039882	0.322589	-0.037261	0.581091	-0.0428807	0.118933	-0.0156129	0.597556	-0.0570471	0.561953	0.2503	0.30563	-0.0024745
1068	rs51545418	2	153.171	0.020098	-0.00272472	0.665291	-0.039882	0.322589	-0.037261	0.581091	-0.0428807	0.118933	-0.0156129	0.597556	-0.0570471	0.561953	0.2503	0.30563	-0.0024745
1069	rs6376291	2	154.141	0.020098	-0.00272472	0.665291	-0.039882	0.322589	-0.037261	0.581091	-0.0428807	0.118933	-0.0156129	0.597556	-0.0570471	0.561953	0.2503	0.30563	-0.0024745
1070	rs32933958	2	154.589	0.020098	-0.00272472	0.665291	-0.039882	0.322589	-0.037261	0.581091	-0.0428807	0.118933	-0.0156129	0.597556	-0.0570471	0.561953	0.2503	0.30563	-0.0024745
1071	rs27310903	2	155.235	0.020098	-0.00272472	0.665291	-0.039882	0.322589	-0.037261	0.581091	-0.0428807	0.118933	-0.0156129	0.597556	-0.0570471	0.561953	0.2503	0.30563	-0.0024745
1072	rs47359238	2	156.631	0.0800788	-0.0103698	0.964919	-0.0522673	0.491334	-0.0523976	0.941942	-0.0609435	0.102045	-0.0137455	0.316723	-0.0357421	0.344724	0.462529	0.0154619	0.000157365
1073	rs27339202	2	156.668	0.0800788	-0.0103698	0.964919	-0.0522673	0.491334	-0.0523976	0.941942	-0.0609435	0.102045	-0.0137455	0.316723	-0.0357421	0.344724	0.462529	0.0154619	0.000157365
1074	rs27337237	2	156.926	0.0800788	-0.0103698	0.964919	-0.0522673	0.491334	-0.0523976	0.941942	-0.0609435	0.102045	-0.0137455	0.316723	-0.0357421	0.344724	0.462529	0.0154619	0.000157365
1075	rs50501514	2	157.223	0.0800788	-0.0103698	0.964919	-0.0522673	0.491334	-0.0523976	0.941942	-0.0609435	0.102045	-0.0137455	0.316723	-0.0357421	0.344724	0.462529	0.0154619	0.000157365
1076	rs27323024	2	157.353	0.0800788	-0.0103698	0.964919	-0.0522673	0.491334	-0.0523976	0.941942	-0.0609435	0.102045	-0.0137455	0.316723	-0.0357421	0.344724	0.462529	0.0154619	0.000157365
1077	rs236156807	2	157.387	0.0800788	-0.0103698	0.964919	-0.0522673	0.491334	-0.0523976	0.941942	-0.0609435	0.102045	-0.0137455	0.316723	-0.0357421	0.344724	0.462529	0.0154619	0.000157365
1078	rs3691210	2	157.995	0.0800788	-0.0103698	0.964919	-0.0522673	0.491334	-0.0523976	0.941942	-0.0609435	0.102045	-0.0137455	0.316723	-0.0357421	0.344724	0.462529	0.0154619	0.000157365
1079	rs3695266	2	158.005	0.275728	-0.0304448	0.95741	-0.0519949	0.791643	-0.0734671	0.932994	-0.0603991	0.153627	-0.0198109	0.327184	-0.0366337	0.198898	0.701369	0.0813705	0.000777727
1080	rs29541360	2	158.665	0.275728	-0.0304448	0.95741	-0.0519949	0.791643	-0.0734671	0.932994	-0.0603991	0.153627	-0.0198109	0.327184	-0.0366337	0.198898	0.701369	0.0813705	0.000777727
1081	rs13476870	2	158.741	0.275728	-0.0304448	0.95741	-0.0519949	0.791643	-0.0734671	0.932994	-0.0603991	0.153627	-0.0198109	0.327184	-0.0366337	0.198898	0.701369	0.0813705	0.000777727
1082	rs33731576	2	158.948	0.253582	-0.0284158	0.40577	-0.0281138	0.390344	-0.0438332	0.280802	-0.0249069	0.0959378	-0.0130915	0.0294182	0.00417461	0.876511	0.0572427	0.0307994	-0.000317289
1083	rs27320863	2	159.045	0.253582	-0.0284158	0.40577	-0.0281138	0.390344	-0.0438332	0.280802	-0.0249069	0.0959378	-0.0130915	0.0294182	0.00417461	0.876511	0.0572427	0.0307994	-0.000317289
1084	rs27320666	2	159.106	0.253582	-0.0284158	0.40577	-0.0281138	0.390344	-0.0438332	0.280802	-0.0249069	0.0959378	-0.0130915	0.0294182	0.00417461	0.876511	0.0572427	0.0307994	-0.000317289
1085	rs33146097	2	159.228	0.119983	-0.0155546	0.197581	-0.0162483	0.254524	-0.0323896	0.275702	-0.0255044	0.0691783	0.00999261	0.145379	-0.0192836	0.96148	0.0170597	0.548922	-0.0041466
1086	rs27337506	2	159.448	0.0876815	0.0126385	0.765054	-0.0496135	0.331968	-0.0432231	0.436563	-0.0394233	0.10702	-0.0160283	0.449187	-0.0521351	0.613536	0.21216	1.93624	-0.00957084
1087	rs48026383	2	159.492	0.0876815	0.0126385	0.765054	-0.0496135	0.331968	-0.0432231	0.436563	-0.0394233	0.10702	-0.0160283	0.449187	-0.0521351	0.613536	0.21216	1.93624	-0.00957084
1088	rs6389365	2	159.543	0.0844173	0.0123069	0.449927	-0.0339451	0.140242	-0.0211967	0.27307	-0.0274673	0.167515	-0.0239772	0.262248	-0.0344518	0.8978	0.0468204	1.48618	-0.00820322
1089	rs3691508	2	159.581	0.0844173	0.0123069	0.449927	-0.0339451	0.140242	-0.0211967	0.27307	-0.0274673	0.167515	-0.0239772	0.262248	-0.0344518	0.8978	0.0468204	1.48618	-0.00820322
1090	rs46087499	2	159.625	0.0844173	0.0123069	0.449927	-0.0339451	0.140242	-0.0211967	0.27307	-0.0274673	0.167515	-0.0239772	0.262248	-0.0344518	0.8978	0.0468204	1.48618	-0.00820322
1091	rs32998433	2	159.899	0.0844173	0.0123069	0.449927	-0.0339451	0.140242	-0.0211967	0.27307	-0.0274673	0.167515	-0.0239772	0.262248	-0.0344518	0.8978	0.0468204	1.48618	-0.00820322
1092	rs47659994	2	159.922	0.0844173	0.0123069	0.449927	-0.0339451	0.140242	-0.0211967	0.27307	-0.0274673	0.167515	-0.0239772	0.262248	-0.0344518	0.8978	0.0468204	1.48618	-0.00820322
1093	rs261392005	2	160.117	0.0844173	0.0123069	0.449927	-0.0339451	0.140242	-0.0211967	0.27307	-0.0274673	0.167515	-0.0239772	0.262248	-0.0344518	0.8978	0.0468204	1.48618	-0.00820322
1094	rs6152944	2	160.304	0.0844173	0.0123069	0.449927	-0.0339451	0.140242	-0.0211967	0.27307	-0.0274673	0.167515	-0.0239772	0.262248	-0.0344518	0.8978	0.0468204	1.48618	-0.00820322
1095	rs46009649	2	160.464	0.0844173	0.0123069	0.449927	-0.0339451	0.140242	-0.0211967	0.27307	-0.0274673	0.167515	-0.0239772	0.262248	-0.0344518	0.8978	0.0468204	1.48618	-0.00820322
1096	rs13476878	2	160.769	0.0844173	0.0123069	0.449927	-0.0339451	0.140242	-0.0211967	0.27307	-0.0274673	0.167515	-0.0239772	0.262248	-0.0344518	0.8978	0.0468204	1.48618	-0.00820322
1097	rs50598383	2	161.123	0.0844173	0.0123069	0.449927	-0.0339451	0.140242	-0.0211967	0.27307	-0.0274673	0.167515	-0.0239772	0.262248	-0.0344518	0.8978	0.0468204	1.48618	-0.00820322
1098	rs27305634	2	161.18	0.0844173	0.0123069	0.449927	-0.0339451	0.140242	-0.0211967	0.27307	-0.0274673	0.167515	-0.0239772	0.262248	-0.0344518	0.8978	0.0468204	1.48618	-0.00820322
1099	rs27350897	2	161.691	0.523412	0.0531223	0.288339	0.0226021	0.513148	0.056681	0.459486	0.0385734	0.529541	0.0572108	0.769923	0.0732623	0.288017	0.540582	0.216878	-0.00197195
1100	rs27333533	2	161.746	0.523412	0.0531223	0.288339	0.0226021	0.513148	0.056681	0.459486	0.0385734	0.529541	0.0572108	0.769923	0.0732623	0.288017	0.540582	0.216878	-0.00197195
1101	rs27350611	2	161.896	0.523412	0.0531223	0.288339	0.0226021	0.513148	0.056681	0.459486	0.0385734	0.529541	0.0572108	0.769923	0.0732623	0.288017	0.540582	0.216878	-0.00197195
1102	rs27350606	2	161.896	0.758882	0.0623541	0.635801	0.0371844	0.92205	0.0762035	0.628589	0.0433111	0.391393	0.0410507	1.19761	0.0879289	0.0521456	1.28278	0.0579783	0.000572194
1103	rs27350596	2	161.897	0.758882	0.0623541	0.635801	0.0371844	0.92205	0.0762035	0.628589	0.0433111	0.391393	0.0410507	1.19761	0.0879289	0.0521456	1.28278	0.0579783	0.000572194
1104	rs27317603	2	162.023	0.758882	0.0623541	0.635801	0.0371844	0.92205	0.0762035	0.628589	0.0433111	0.391393	0.0410507	1.19761	0.0879289	0.0521456	1.28278	0.0579783	0.000572194
1105	rs27303047	2	162.233	0.758882	0.0623541	0.635801	0.0371844	0.92205	0.0762035	0.628589	0.0433111	0.391393	0.0410507	1.19761	0.0879289	0.0521456	1.28278	0.0579783	0.000572194
1106	rs27316684	2	162.637	0.758882	0.0623541	0.635801	0.0371844	0.92205	0.0762035	0.628589	0.0433111	0.391393	0.0410507	1.19761	0.0879289	0.0521456	1.28278	0.0579783	0.000572194
1107	rs27300581	2	162.693	1.25315	0.0832544	1.30699	0.057487	1.1532	0.0849579	0.917546	0.0538845	0.798177	0.066016	2.40899	0.12585	0.000312732	3.50483	0.330508	0.0025479
1108	rs28245692	2	162.891	1.28511	0.084892	1.28065	0.0568389	0.94365	0.0746945	1.13348	0.0620405	0.746531	0.0630375	2.13903	0.118147	0.00052849	3.27696	0.322858	0.00249715
1109	rs3671849	2	163.153	1.28511	0.084892	1.28065	0.0568389	0.94365	0.0746945	1.13348	0.0620405	0.746531	0.0630375	2.13903	0.118147	0.00052849	3.27696	0.322858	0.00249715
1110	rs33318324	2	163.549	1.28511	0.084892	1.28065	0.0568389	0.94365	0.0746945	1.13348	0.0620405	0.746531	0.0630375	2.13903	0.118147	0.00052849	3.27696	0.322858	0.00249715
1111	rs49887173	2	163.774	0.833411	0.0669707	1.06967	0.0530642	0.800007	0.0702312	0.985243	0.0595375	0.371988	0.0393791	1.67367	0.107679	0.00939958	2.02689	0.438628	0.00329013
1112	rs27331142	2	163.774	0.833411	0.0669707	1.06967	0.0530642	0.800007	0.0702312	0.985243	0.0595375	0.371988	0.0393791	1.67367	0.107679	0.00939958	2.02689	0.438628	0.00329013
1113	rs6345991	2	163.807	1.28511	0.084892	1.28065	0.0568389	0.94365	0.0746945	1.13348	0.0620405	0.746531	0.0630375	2.13903	0.118147	0.00052849	3.27696	0.322858	0.00249715
1114	rs13476889	2	164.308	1.3135	0.0869313	1.11577	0.052539	0.82495	0.0689881	1.03971	0.0592773	0.808048	0.0670662	1.98655	0.114599	0.00109988	2.95866	0.238916	0.00196712
1115	rs49712246	2	164.366	1.3135	0.0869313	1.11577	0.052539	0.82495	0.0689881	1.03971	0.0592773	0.808048	0.0670662	1.98655	0.114599	0.00109988	2.95866	0.238916	0.00196712
1116	rs8275857	2	164.374	1.3135	0.0869313	1.11577	0.052539	0.82495	0.0689881	1.03971	0.0592773	0.808048	0.0670662	1.98655	0.114599	0.00109988	2.95866	0.238916	0.00196712
1117	rs29671327	2	164.451	1.3135	0.0869313	1.11577	0.052539	0.82495	0.0689881	1.03971	0.0592773	0.808048	0.0670662	1.98655	0.114599	0.00109988	2.95866	0.238916	0.00196712
1118	rs13476891	2	164.734	1.3135	0.0869313	1.11577	0.052539	0.82495	0.0689881	1.03971	0.0592773	0.808048	0.0670662	1.98655	0.114599	0.00109988	2.95866	0.238916	0.00196712
1119	rs28262110	2	164.927	0.854329	0.0689651	0.912467	0.0483317	0.685405	0.0639555	0.894528	0.0565584	0.415994	0.0433146	1.53651	0.10375	0.0179146	1.74679	0.342659	0.00273587
1120	rs46248753	2	164.946	0.854329	0.0689651	0.912467	0.0483317	0.685405	0.0639555	0.894528	0.0565584	0.415994	0.0433146	1.53651	0.10375	0.0179146	1.74679	0.342659	0.00273587
1121	rs28262081	2	164.947	1.77837	0.108104	1.50258	0.0653592	1.00671	0.0821772	1.14611	0.0658434	0.930763	0.0748768	1.83967	0.11471	0.000166697	3.77807	0.226028	0.00193779
1122	rs6185704	2	164.954	2.40653	0.123116	1.74385	0.0684577	1.16257	0.0861221	1.30614	0.0682307	1.47276	0.0964003	2.33823	0.125473	3.08546e-06	5.51068	0.138706	0.00122606
1123	rs28240225	2	165.086	1.77837	0.108104	1.50258	0.0653592	1.00671	0.0821772	1.14611	0.0658434	0.930763	0.0748768	1.83967	0.11471	0.000166697	3.77807	0.226028	0.00193779
1124	rs6177049	2	165.783	0.894272	0.0688546	0.458835	0.0291038	0.144017	0.018084	0.235296	0.0203586	0.841068	0.068795	0.477474	0.0465101	0.297514	0.526492	0.289854	0.00235346
1125	rs251909769	2	165.927	0.894272	0.0688546	0.458835	0.0291038	0.144017	0.018084	0.235296	0.0203586	0.841068	0.068795	0.477474	0.0465101	0.297514	0.526492	0.289854	0.00235346
1126	rs27330219	2	166.459	0.894272	0.0688546	0.458835	0.0291038	0.144017	0.018084	0.235296	0.0203586	0.841068	0.068795	0.477474	0.0465101	0.297514	0.526492	0.289854	0.00235346
1127	rs27298855	2	166.539	0.894272	0.0688546	0.458835	0.0291038	0.144017	0.018084	0.235296	0.0203586	0.841068	0.068795	0.477474	0.0465101	0.297514	0.526492	0.289854	0.00235346
1128	rs27298670	2	166.584	0.894272	0.0688546	0.458835	0.0291038	0.144017	0.018084	0.235296	0.0203586	0.841068	0.068795	0.477474	0.0465101	0.297514	0.526492	0.289854	0.00235346
1129	rs33596136	2	166.596	0.894272	0.0688546	0.458835	0.0291038	0.144017	0.018084	0.235296	0.0203586	0.841068	0.068795	0.477474	0.0465101	0.297514	0.526492	0.289854	0.00235346
1130	rs3653795	2	166.63	0.403066	0.0421277	0.525548	0.0344214	0.047254	0.00716109	0.303091	0.0274563	1.96582	0.12195	0.57222	0.0577054	0.129121	0.889005	0.262864	0.00224535
1131	rs27329212	2	166.948	0.403066	0.0421277	0.525548	0.0344214	0.047254	0.00716109	0.303091	0.0274563	1.96582	0.12195	0.57222	0.0577054	0.129121	0.889005	0.262864	0.00224535
1132	rs27294310	2	167.166	0.403066	0.0421277	0.525548	0.0344214	0.047254	0.00716109	0.303091	0.0274563	1.96582	0.12195	0.57222	0.0577054	0.129121	0.889005	0.262864	0.00224535
1133	rs33242840	2	167.191	0.0301371	-0.00420492	0.173743	0.0141975	0.107734	-0.0152816	0.153795	0.0154051	1.06743	0.0860677	0.389096	0.0428227	0.715617	0.14532	0.387584	0.00303356
1134	rs27294189	2	167.226	0.0301371	-0.00420492	0.173743	0.0141975	0.107734	-0.0152816	0.153795	0.0154051	1.06743	0.0860677	0.389096	0.0428227	0.715617	0.14532	0.387584	0.00303356
1135	rs244853031	2	167.374	0.00457011	0.000662498	0.12282	0.010534	0.195639	-0.0262718	0.00222982	0.00026257	1.22621	0.0939647	0.363412	0.0412385	0.718363	0.143656	0.2284	0.00198724
1136	rs240164327	2	167.595	0.00457011	0.000662498	0.12282	0.010534	0.195639	-0.0262718	0.00222982	0.00026257	1.22621	0.0939647	0.363412	0.0412385	0.718363	0.143656	0.2284	0.00198724
1137	rs27280985	2	168.424	0.0903822	0.0121354	0.177159	0.0146667	0.384668	-0.0461528	0.0384737	-0.00439621	1.24156	0.0951077	0.40098	0.0450437	0.550897	0.258929	0.328998	0.00269624
1138	rs32846064	2	168.433	0.0903822	0.0121354	0.177159	0.0146667	0.384668	-0.0461528	0.0384737	-0.00439621	1.24156	0.0951077	0.40098	0.0450437	0.550897	0.258929	0.328998	0.00269624
1139	rs27341626	2	168.436	0.0316524	0.00391557	0.00887418	0.000769883	0.531753	-0.0509258	0.0697487	0.0067074	1.36505	0.0949275	0.037613	-0.00490295	0.667035	0.175851	0.0846803	0.000791157
1140	rs27341574	2	168.446	0.101898	0.0115085	0.14907	0.0110701	0.374175	-0.0383167	0.0724443	0.00684264	1.69147	0.106884	0.0774881	-0.00955675	0.498438	0.302389	0.112698	0.00101322
1141	rs6319166	2	168.575	0.101898	0.0115085	0.14907	0.0110701	0.374175	-0.0383167	0.0724443	0.00684264	1.69147	0.106884	0.0774881	-0.00955675	0.498438	0.302389	0.112698	0.00101322
1142	rs48233920	2	168.584	0.101898	0.0115085	0.14907	0.0110701	0.374175	-0.0383167	0.0724443	0.00684264	1.69147	0.106884	0.0774881	-0.00955675	0.498438	0.302389	0.112698	0.00101322
1143	rs29506586	2	168.957	0.101898	0.0115085	0.14907	0.0110701	0.374175	-0.0383167	0.0724443	0.00684264	1.69147	0.106884	0.0774881	-0.00955675	0.498438	0.302389	0.112698	0.00101322
1144	rs6160839	2	168.967	0.101898	0.0115085	0.14907	0.0110701	0.374175	-0.0383167	0.0724443	0.00684264	1.69147	0.106884	0.0774881	-0.00955675	0.498438	0.302389	0.112698	0.00101322
1145	rs27288701	2	169.114	0.101898	0.0115085	0.14907	0.0110701	0.374175	-0.0383167	0.0724443	0.00684264	1.69147	0.106884	0.0774881	-0.00955675	0.498438	0.302389	0.112698	0.00101322
1146	rs49223793	2	169.359	0.101898	0.0115085	0.14907	0.0110701	0.374175	-0.0383167	0.0724443	0.00684264	1.69147	0.106884	0.0774881	-0.00955675	0.498438	0.302389	0.112698	0.00101322
1147	rs27622025	2	169.541	0.101898	0.0115085	0.14907	0.0110701	0.374175	-0.0383167	0.0724443	0.00684264	1.69147	0.106884	0.0774881	-0.00955675	0.498438	0.302389	0.112698	0.00101322
1148	rs3663663	2	169.645	0.101898	0.0115085	0.14907	0.0110701	0.374175	-0.0383167	0.0724443	0.00684264	1.69147	0.106884	0.0774881	-0.00955675	0.498438	0.302389	0.112698	0.00101322
1149	rs27628756	2	169.887	0.101898	0.0115085	0.14907	0.0110701	0.374175	-0.0383167	0.0724443	0.00684264	1.69147	0.106884	0.0774881	-0.00955675	0.498438	0.302389	0.112698	0.00101322
1150	rs27628736	2	169.892	0.279214	0.0272871	0.233622	0.0162227	0.159745	-0.0188631	0.251794	0.0204755	1.87531	0.113055	0.227835	-0.0247938	0.304411	0.516539	0.0264697	0.000257465
1151	rs27628709	2	169.897	0.264199	0.0259929	0.250078	0.0171401	0.0627193	-0.00802062	0.142408	0.0125557	1.96116	0.116379	0.139747	-0.0162177	0.369912	0.431901	0.0315859	0.000305929
1152	rs3148016	2	170.104	0.264199	0.0259929	0.250078	0.0171401	0.0627193	-0.00802062	0.142408	0.0125557	1.96116	0.116379	0.139747	-0.0162177	0.369912	0.431901	0.0315859	0.000305929
1153	rs3148034	2	170.207	0.299768	0.0289518	0.182832	0.0132547	0.0970786	-0.0121388	0.116252	0.0105734	1.89811	0.114527	0.00448476	0.000597794	0.448362	0.348372	0.0368069	0.000355636
1154	rs13476914	2	170.827	1.6352	0.106537	0.260816	0.0201426	0.455559	0.0510767	0.262626	0.0243712	1.12829	0.0923034	0.164849	0.0213409	0.115874	0.936015	0.00219167	-2.33e-05
1155	rs33554237	2	170.843	1.17311	0.0872259	0.169835	0.0140342	0.266098	0.0334027	0.13555	0.0138495	1.1788	0.0955734	0.0503972	0.00723743	0.320619	0.494011	0.168589	-0.00154111
1156	rs51325068	2	171.443	1.17311	0.0872259	0.169835	0.0140342	0.266098	0.0334027	0.13555	0.0138495	1.1788	0.0955734	0.0503972	0.00723743	0.320619	0.494011	0.168589	-0.00154111
1157	rs28275396	2	171.488	1.17311	0.0872259	0.169835	0.0140342	0.266098	0.0334027	0.13555	0.0138495	1.1788	0.0955734	0.0503972	0.00723743	0.320619	0.494011	0.168589	-0.00154111
1158	rs49535594	2	171.556	1.17311	0.0872259	0.169835	0.0140342	0.266098	0.0334027	0.13555	0.0138495	1.1788	0.0955734	0.0503972	0.00723743	0.320619	0.494011	0.168589	-0.00154111
1159	UNC020329635	2	171.559	1.17311	0.0872259	0.169835	0.0140342	0.266098	0.0334027	0.13555	0.0138495	1.1788	0.0955734	0.0503972	0.00723743	0.320619	0.494011	0.168589	-0.00154111
1160	rs27620393	2	172.715	1.17311	0.0872259	0.169835	0.0140342	0.266098	0.0334027	0.13555	0.0138495	1.1788	0.0955734	0.0503972	0.00723743	0.320619	0.494011	0.168589	-0.00154111
1161	rs33381117	2	172.735	1.17311	0.0872259	0.169835	0.0140342	0.266098	0.0334027	0.13555	0.0138495	1.1788	0.0955734	0.0503972	0.00723743	0.320619	0.494011	0.168589	-0.00154111
1162	rs27636820	2	172.894	1.17311	0.0872259	0.169835	0.0140342	0.266098	0.0334027	0.13555	0.0138495	1.1788	0.0955734	0.0503972	0.00723743	0.320619	0.494011	0.168589	-0.00154111
1163	rs46920619	2	173.244	0.791297	0.0678285	0.0838051	0.00750594	0.0522663	0.00789734	0.0360821	-0.00408144	1.02657	0.0878425	0.218714	0.0274126	0.60091	0.22119	0.068689	-0.000685393
1164	rs27615350	2	173.259	0.791297	0.0678285	0.0838051	0.00750594	0.0522663	0.00789734	0.0360821	-0.00408144	1.02657	0.0878425	0.218714	0.0274126	0.60091	0.22119	0.068689	-0.000685393
1165	rs27621324	2	173.427	0.372329	0.036985	0.128489	0.0103753	0.0118723	-0.00174017	0.0453469	-0.00473094	0.868961	0.0743531	0.890127	0.0739167	0.557325	0.253891	0.250192	0.00208881
1166	rs27644551	2	173.543	0.372329	0.036985	0.128489	0.0103753	0.0118723	-0.00174017	0.0453469	-0.00473094	0.868961	0.0743531	0.890127	0.0739167	0.557325	0.253891	0.250192	0.00208881
1167	rs27644503	2	173.55	0.256391	0.0275586	0.211865	0.0160358	0.0999516	0.0134859	0.0624976	0.00644457	1.0623	0.0854725	0.731649	0.0649489	0.514755	0.288399	0.145956	0.00132158
1168	rs27644500	2	173.55	0.256391	0.0275586	0.211865	0.0160358	0.0999516	0.0134859	0.0624976	0.00644457	1.0623	0.0854725	0.731649	0.0649489	0.514755	0.288399	0.145956	0.00132158
1169	rs6384888	2	173.551	0.256391	0.0275586	0.211865	0.0160358	0.0999516	0.0134859	0.0624976	0.00644457	1.0623	0.0854725	0.731649	0.0649489	0.514755	0.288399	0.145956	0.00132158
1170	rs27644412	2	173.597	0.256391	0.0275586	0.211865	0.0160358	0.0999516	0.0134859	0.0624976	0.00644457	1.0623	0.0854725	0.731649	0.0649489	0.514755	0.288399	0.145956	0.00132158
1171	rs33360234	2	173.64	0.254548	0.027511	0.316788	0.0223829	0.173761	0.0220564	0.113877	0.0112196	1.01223	0.0832955	0.852846	0.0723154	0.402982	0.394715	0.226864	0.00194548
1172	Affy_PC2_176	2	176	0.181157	0.020835	0.0279032	-0.00254311	0.0539651	0.0076155	0.041136	-0.00435326	0.573146	0.0575259	0.0700543	-0.00938957	0.975966	0.0105654	0.0530465	0.000539132
1173	rs3674193	2	178.717	0.722751	-0.0634608	0.925166	-0.0505821	1.47502	-0.107607	0.819785	-0.0545684	0.279734	-0.0334392	0.734674	-0.0671796	0.0292184	1.53434	0.213647	0.00191116
1174	rs27685974	2	178.753	0.722751	-0.0634608	0.925166	-0.0505821	1.47502	-0.107607	0.819785	-0.0545684	0.279734	-0.0334392	0.734674	-0.0671796	0.0292184	1.53434	0.213647	0.00191116
1175	rs27686798	2	178.978	0.722751	-0.0634608	0.925166	-0.0505821	1.47502	-0.107607	0.819785	-0.0545684	0.279734	-0.0334392	0.734674	-0.0671796	0.0292184	1.53434	0.213647	0.00191116
1176	rs47711234	2	179.006	0.722751	-0.0634608	0.925166	-0.0505821	1.47502	-0.107607	0.819785	-0.0545684	0.279734	-0.0334392	0.734674	-0.0671796	0.0292184	1.53434	0.213647	0.00191116
1177	rs27686643	2	179.007	0.459543	-0.0435174	0.665548	-0.0384444	1.06242	-0.0835386	0.32416	-0.0262933	0.170475	-0.0211339	0.895555	-0.0734317	0.170396	0.76854	0.213647	0.00191116
1178	rs50774873	2	179.086	0.459543	-0.0435174	0.665548	-0.0384444	1.06242	-0.0835386	0.32416	-0.0262933	0.170475	-0.0211339	0.895555	-0.0734317	0.170396	0.76854	0.213647	0.00191116
1179	rs27651925	2	179.089	0.486626	-0.0461577	0.65417	-0.0385175	0.864892	-0.0740525	0.476999	-0.0359444	0.139978	-0.0180297	0.753281	-0.066191	0.212886	0.671853	0.224	0.00200939
1180	rs221878050	2	179.095	0.486626	-0.0461577	0.65417	-0.0385175	0.864892	-0.0740525	0.476999	-0.0359444	0.139978	-0.0180297	0.753281	-0.066191	0.212886	0.671853	0.224	0.00200939
1181	rs27651776	2	179.105	0.486626	-0.0461577	0.65417	-0.0385175	0.864892	-0.0740525	0.476999	-0.0359444	0.139978	-0.0180297	0.753281	-0.066191	0.212886	0.671853	0.224	0.00200939
1182	rs13476936	2	179.208	0.769275	-0.0678677	0.924162	-0.0516182	1.24618	-0.0993066	1.08172	-0.0670681	0.246066	-0.0306447	0.60291	-0.0596764	0.0329875	1.48165	0.224	0.00200939
1183	rs27650776	2	179.215	0.769275	-0.0678677	0.924162	-0.0516182	1.24618	-0.0993066	1.08172	-0.0670681	0.246066	-0.0306447	0.60291	-0.0596764	0.0329875	1.48165	0.224	0.00200939
1184	rs27650686	2	179.225	0.769275	-0.0678677	0.924162	-0.0516182	1.24618	-0.0993066	1.08172	-0.0670681	0.246066	-0.0306447	0.60291	-0.0596764	0.0329875	1.48165	0.224	0.00200939
1185	rs27698917	2	179.244	0.486626	-0.0461577	0.65417	-0.0385175	0.864892	-0.0740525	0.476999	-0.0359444	0.139978	-0.0180297	0.753281	-0.066191	0.212886	0.671853	0.224	0.00200939
1186	rs27683488	2	179.264	0.486626	-0.0461577	0.65417	-0.0385175	0.864892	-0.0740525	0.476999	-0.0359444	0.139978	-0.0180297	0.753281	-0.066191	0.212886	0.671853	0.224	0.00200939
1187	rs33598222	2	179.278	0.486626	-0.0461577	0.65417	-0.0385175	0.864892	-0.0740525	0.476999	-0.0359444	0.139978	-0.0180297	0.753281	-0.066191	0.212886	0.671853	0.224	0.00200939
1188	rs6335805	2	179.279	0.769275	-0.0678677	0.924162	-0.0516182	1.24618	-0.0993066	1.08172	-0.0670681	0.246066	-0.0306447	0.60291	-0.0596764	0.0329875	1.48165	0.224	0.00200939
1189	rs27683321	2	179.293	0.769275	-0.0678677	0.924162	-0.0516182	1.24618	-0.0993066	1.08172	-0.0670681	0.246066	-0.0306447	0.60291	-0.0596764	0.0329875	1.48165	0.224	0.00200939
1190	rs49176349	2	179.317	1.0511	-0.0799983	0.655863	-0.0389646	1.31388	-0.0976488	1.25384	-0.0702311	0.107178	-0.0143614	0.948265	-0.0782749	0.017126	1.76634	0.0503102	0.000510085
1191	rs33181947	2	179.482	1.0511	-0.0799983	0.655863	-0.0389646	1.31388	-0.0976488	1.25384	-0.0702311	0.107178	-0.0143614	0.948265	-0.0782749	0.017126	1.76634	0.0503102	0.000510085
1192	rs6187766	2	179.523	1.0511	-0.0799983	0.655863	-0.0389646	1.31388	-0.0976488	1.25384	-0.0702311	0.107178	-0.0143614	0.948265	-0.0782749	0.017126	1.76634	0.0503102	0.000510085
1193	rs33458785	2	179.684	1.0511	-0.0799983	0.655863	-0.0389646	1.31388	-0.0976488	1.25384	-0.0702311	0.107178	-0.0143614	0.948265	-0.0782749	0.017126	1.76634	0.0503102	0.000510085
1194	rs27639333	2	179.692	0.712198	-0.0581242	0.444391	-0.0277118	0.926007	-0.0736829	0.605715	-0.0407851	0.0281759	-0.00388455	1.09938	-0.0815189	0.129294	0.888423	0.0503102	0.000510085
1195	rs27668635	2	179.792	0.712198	-0.0581242	0.444391	-0.0277118	0.926007	-0.0736829	0.605715	-0.0407851	0.0281759	-0.00388455	1.09938	-0.0815189	0.129294	0.888423	0.0503102	0.000510085
1196	rs32860893	2	179.822	0.609358	-0.0523197	0.259207	-0.0182731	0.724749	-0.0627741	0.349486	-0.0271495	0.0439372	-0.00601525	1.56532	-0.102264	0.175392	0.755991	0.265196	-0.00226408
1197	rs27648323	2	179.825	0.609358	-0.0523197	0.259207	-0.0182731	0.724749	-0.0627741	0.349486	-0.0271495	0.0439372	-0.00601525	1.56532	-0.102264	0.175392	0.755991	0.265196	-0.00226408
1198	rs3703298	2	179.961	0.909147	-0.0726465	0.420757	-0.0281499	1.04267	-0.0843193	0.84685	-0.0544051	0.126233	-0.0166747	1.38791	-0.0999336	0.0398368	1.39972	0.265196	-0.00226408
1199	rs29624362	2	180.114	0.909147	-0.0726465	0.420757	-0.0281499	1.04267	-0.0843193	0.84685	-0.0544051	0.126233	-0.0166747	1.38791	-0.0999336	0.0398368	1.39972	0.265196	-0.00226408
1200	rs33003485	2	180.125	0.909147	-0.0726465	0.420757	-0.0281499	1.04267	-0.0843193	0.84685	-0.0544051	0.126233	-0.0166747	1.38791	-0.0999336	0.0398368	1.39972	0.265196	-0.00226408
1201	rs218860029	2	180.208	0.909147	-0.0726465	0.420757	-0.0281499	1.04267	-0.0843193	0.84685	-0.0544051	0.126233	-0.0166747	1.38791	-0.0999336	0.0398368	1.39972	0.265196	-0.00226408
1202	rs27679156	2	180.208	0.609358	-0.0523197	0.259207	-0.0182731	0.724749	-0.0627741	0.349486	-0.0271495	0.0439372	-0.00601525	1.56532	-0.102264	0.175392	0.755991	0.265196	-0.00226408
1203	rs27641595	2	180.358	0.609358	-0.0523197	0.259207	-0.0182731	0.724749	-0.0627741	0.349486	-0.0271495	0.0439372	-0.00601525	1.56532	-0.102264	0.175392	0.755991	0.265196	-0.00226408
1204	rs33412241	2	180.372	0.609358	-0.0523197	0.259207	-0.0182731	0.724749	-0.0627741	0.349486	-0.0271495	0.0439372	-0.00601525	1.56532	-0.102264	0.175392	0.755991	0.265196	-0.00226408
1205	rs29916209	2	180.485	0.609358	-0.0523197	0.259207	-0.0182731	0.724749	-0.0627741	0.349486	-0.0271495	0.0439372	-0.00601525	1.56532	-0.102264	0.175392	0.755991	0.265196	-0.00226408
1206	rs13476942	2	180.688	0.909147	-0.0726465	0.420757	-0.0281499	1.04267	-0.0843193	0.84685	-0.0544051	0.126233	-0.0166747	1.38791	-0.0999336	0.0398368	1.39972	0.265196	-0.00226408
1207	rs27640086	2	180.798	0.609358	-0.0523197	0.259207	-0.0182731	0.724749	-0.0627741	0.349486	-0.0271495	0.0439372	-0.00601525	1.56532	-0.102264	0.175392	0.755991	0.265196	-0.00226408
1208	rs27698317	2	180.804	0.609358	-0.0523197	0.259207	-0.0182731	0.724749	-0.0627741	0.349486	-0.0271495	0.0439372	-0.00601525	1.56532	-0.102264	0.175392	0.755991	0.265196	-0.00226408
1209	rs27683262	2	180.808	1.11871	-0.079932	0.090605	-0.00735197	0.645352	-0.0587957	0.488262	-0.0355211	0.133626	0.0167705	0.714973	-0.0617299	0.258394	0.587717	0.0183655	-0.000187846
1210	rs27683255	2	180.809	0.609358	-0.0523197	0.259207	-0.0182731	0.724749	-0.0627741	0.349486	-0.0271495	0.0439372	-0.00601525	1.56532	-0.102264	0.175392	0.755991	0.265196	-0.00226408
1211	rs27683096	2	180.835	0.609358	-0.0523197	0.259207	-0.0182731	0.724749	-0.0627741	0.349486	-0.0271495	0.0439372	-0.00601525	1.56532	-0.102264	0.175392	0.755991	0.265196	-0.00226408
1212	rs27680502	2	181.009	0.935821	-0.0697513	0.211793	-0.015269	0.771992	-0.0648378	0.538413	-0.0372143	0.338946	-0.0360965	1.66944	-0.105139	0.0570668	1.24362	0.188747	-0.00169093
1213	rs27680457	2	181.014	0.935821	-0.0697513	0.211793	-0.015269	0.771992	-0.0648378	0.538413	-0.0372143	0.338946	-0.0360965	1.66944	-0.105139	0.0570668	1.24362	0.188747	-0.00169093
1214	rs27680311	2	181.047	0.935821	-0.0697513	0.211793	-0.015269	0.771992	-0.0648378	0.538413	-0.0372143	0.338946	-0.0360965	1.66944	-0.105139	0.0570668	1.24362	0.188747	-0.00169093
1215	rs6305540	2	181.091	1.35952	-0.0949038	0.36763	-0.0255079	1.13296	-0.0896627	1.16598	-0.0674601	0.486845	-0.0505174	1.53628	-0.107197	0.00580342	2.23632	0.188747	-0.00169093
1216	rs33599721	2	181.569	1.35952	-0.0949038	0.36763	-0.0255079	1.13296	-0.0896627	1.16598	-0.0674601	0.486845	-0.0505174	1.53628	-0.107197	0.00580342	2.23632	0.188747	-0.00169093
1217	rs27654345	2	181.623	1.35952	-0.0949038	0.36763	-0.0255079	1.13296	-0.0896627	1.16598	-0.0674601	0.486845	-0.0505174	1.53628	-0.107197	0.00580342	2.23632	0.188747	-0.00169093
1218	rs27652608	2	181.989	1.35952	-0.0949038	0.36763	-0.0255079	1.13296	-0.0896627	1.16598	-0.0674601	0.486845	-0.0505174	1.53628	-0.107197	0.00580342	2.23632	0.188747	-0.00169093
1219	rs6317711	2	181.991	1.35952	-0.0949038	0.36763	-0.0255079	1.13296	-0.0896627	1.16598	-0.0674601	0.486845	-0.0505174	1.53628	-0.107197	0.00580342	2.23632	0.188747	-0.00169093
1220	rs29619692	3	3.07424	1.28137	0.092218	0.421356	0.0281051	0.267212	0.0315643	0.272283	0.0239464	0.021876	0.00311644	0.103884	0.0132596	0.53708	0.269961	0.194495	-0.00168943
1221	rs13476950	3	3.78542	1.28137	0.092218	0.421356	0.0281051	0.267212	0.0315643	0.272283	0.0239464	0.021876	0.00311644	0.103884	0.0132596	0.53708	0.269961	0.194495	-0.00168943
1222	rs30702264	3	4.36562	1.28137	0.092218	0.421356	0.0281051	0.267212	0.0315643	0.272283	0.0239464	0.021876	0.00311644	0.103884	0.0132596	0.53708	0.269961	0.194495	-0.00168943
1223	rs13476958	3	5.90428	1.28137	0.092218	0.421356	0.0281051	0.267212	0.0315643	0.272283	0.0239464	0.021876	0.00311644	0.103884	0.0132596	0.53708	0.269961	0.194495	-0.00168943
1224	rs29623223	3	6.43054	1.28137	0.092218	0.421356	0.0281051	0.267212	0.0315643	0.272283	0.0239464	0.021876	0.00311644	0.103884	0.0132596	0.53708	0.269961	0.194495	-0.00168943
1225	rs13476961	3	6.80795	1.28137	0.092218	0.421356	0.0281051	0.267212	0.0315643	0.272283	0.0239464	0.021876	0.00311644	0.103884	0.0132596	0.53708	0.269961	0.194495	-0.00168943
1226	rs30460351	3	7.27494	1.28137	0.092218	0.421356	0.0281051	0.267212	0.0315643	0.272283	0.0239464	0.021876	0.00311644	0.103884	0.0132596	0.53708	0.269961	0.194495	-0.00168943
1227	rs29659075	3	7.38367	1.28137	0.092218	0.421356	0.0281051	0.267212	0.0315643	0.272283	0.0239464	0.021876	0.00311644	0.103884	0.0132596	0.53708	0.269961	0.194495	-0.00168943
1228	rs29660738	3	7.52453	1.28137	0.092218	0.421356	0.0281051	0.267212	0.0315643	0.272283	0.0239464	0.021876	0.00311644	0.103884	0.0132596	0.53708	0.269961	0.194495	-0.00168943
1229	rs29655312	3	7.63006	1.28137	0.092218	0.421356	0.0281051	0.267212	0.0315643	0.272283	0.0239464	0.021876	0.00311644	0.103884	0.0132596	0.53708	0.269961	0.194495	-0.00168943
1230	rs13476963	3	7.67982	1.28137	0.092218	0.421356	0.0281051	0.267212	0.0315643	0.272283	0.0239464	0.021876	0.00311644	0.103884	0.0132596	0.53708	0.269961	0.194495	-0.00168943
1231	rs29662125	3	8.75487	1.28137	0.092218	0.421356	0.0281051	0.267212	0.0315643	0.272283	0.0239464	0.021876	0.00311644	0.103884	0.0132596	0.53708	0.269961	0.194495	-0.00168943
1232	rs29666306	3	8.90341	1.28137	0.092218	0.421356	0.0281051	0.267212	0.0315643	0.272283	0.0239464	0.021876	0.00311644	0.103884	0.0132596	0.53708	0.269961	0.194495	-0.00168943
1233	rs221284962	3	9.0824	1.7344	0.109524	0.281071	0.0202563	0.350612	0.038702	0.425754	0.0336872	0.0690834	-0.00934366	0.347758	0.0367173	0.253888	0.595358	0.0330904	-0.000332221
1234	rs256767852	3	9.09046	1.7344	0.109524	0.281071	0.0202563	0.350612	0.038702	0.425754	0.0336872	0.0690834	-0.00934366	0.347758	0.0367173	0.253888	0.595358	0.0330904	-0.000332221
1235	rs3668064	3	9.26982	1.7344	0.109524	0.281071	0.0202563	0.350612	0.038702	0.425754	0.0336872	0.0690834	-0.00934366	0.347758	0.0367173	0.253888	0.595358	0.0330904	-0.000332221
1236	rs29671779	3	9.56509	1.7344	0.109524	0.281071	0.0202563	0.350612	0.038702	0.425754	0.0336872	0.0690834	-0.00934366	0.347758	0.0367173	0.253888	0.595358	0.0330904	-0.000332221
1237	rs48986333	3	9.98363	1.81548	0.111495	0.196881	0.0149462	0.286079	0.0326109	0.364881	0.0296264	0.0972962	-0.0127559	0.582353	0.05391	0.220545	0.656503	0.0293068	-0.000294803
1238	rs13476970	3	10.0187	1.81548	0.111495	0.196881	0.0149462	0.286079	0.0326109	0.364881	0.0296264	0.0972962	-0.0127559	0.582353	0.05391	0.220545	0.656503	0.0293068	-0.000294803
1239	rs31052718	3	10.0788	1.81548	0.111495	0.196881	0.0149462	0.286079	0.0326109	0.364881	0.0296264	0.0972962	-0.0127559	0.582353	0.05391	0.220545	0.656503	0.0293068	-0.000294803
1240	rs31722035	3	10.0943	1.81548	0.111495	0.196881	0.0149462	0.286079	0.0326109	0.364881	0.0296264	0.0972962	-0.0127559	0.582353	0.05391	0.220545	0.656503	0.0293068	-0.000294803
1241	rs29709895	3	10.3123	1.81548	0.111495	0.196881	0.0149462	0.286079	0.0326109	0.364881	0.0296264	0.0972962	-0.0127559	0.582353	0.05391	0.220545	0.656503	0.0293068	-0.000294803
1242	rs30990897	3	10.6759	1.81548	0.111495	0.196881	0.0149462	0.286079	0.0326109	0.364881	0.0296264	0.0972962	-0.0127559	0.582353	0.05391	0.220545	0.656503	0.0293068	-0.000294803
1243	rs31674880	3	10.7518	1.81548	0.111495	0.196881	0.0149462	0.286079	0.0326109	0.364881	0.0296264	0.0972962	-0.0127559	0.582353	0.05391	0.220545	0.656503	0.0293068	-0.000294803
1244	rs29715683	3	11.2416	2.13029	0.123905	0.375147	0.0256991	0.411924	0.0441233	0.325678	0.0276307	0.0155766	0.00225987	0.503681	0.0493391	0.137741	0.860938	0.00634293	-6.66e-05
1245	rs30216239	3	11.5587	2.13029	0.123905	0.375147	0.0256991	0.411924	0.0441233	0.325678	0.0276307	0.0155766	0.00225987	0.503681	0.0493391	0.137741	0.860938	0.00634293	-6.66e-05
1246	rs30996270	3	12.1759	2.13029	0.123905	0.375147	0.0256991	0.411924	0.0441233	0.325678	0.0276307	0.0155766	0.00225987	0.503681	0.0493391	0.137741	0.860938	0.00634293	-6.66e-05
1247	rs33320244	3	12.2292	2.13029	0.123905	0.375147	0.0256991	0.411924	0.0441233	0.325678	0.0276307	0.0155766	0.00225987	0.503681	0.0493391	0.137741	0.860938	0.00634293	-6.66e-05
1248	rs6351478	3	12.5656	2.13029	0.123905	0.375147	0.0256991	0.411924	0.0441233	0.325678	0.0276307	0.0155766	0.00225987	0.503681	0.0493391	0.137741	0.860938	0.00634293	-6.66e-05
1249	rs3674446	3	13.7569	2.13029	0.123905	0.375147	0.0256991	0.411924	0.0441233	0.325678	0.0276307	0.0155766	0.00225987	0.503681	0.0493391	0.137741	0.860938	0.00634293	-6.66e-05
1250	rs33433847	3	14.0138	2.13029	0.123905	0.375147	0.0256991	0.411924	0.0441233	0.325678	0.0276307	0.0155766	0.00225987	0.503681	0.0493391	0.137741	0.860938	0.00634293	-6.66e-05
1251	rs6398851	3	14.3781	2.13029	0.123905	0.375147	0.0256991	0.411924	0.0441233	0.325678	0.0276307	0.0155766	0.00225987	0.503681	0.0493391	0.137741	0.860938	0.00634293	-6.66e-05
1252	rs29714374	3	14.6021	2.13029	0.123905	0.375147	0.0256991	0.411924	0.0441233	0.325678	0.0276307	0.0155766	0.00225987	0.503681	0.0493391	0.137741	0.860938	0.00634293	-6.66e-05
1253	rs13476987	3	15.318	2.13029	0.123905	0.375147	0.0256991	0.411924	0.0441233	0.325678	0.0276307	0.0155766	0.00225987	0.503681	0.0493391	0.137741	0.860938	0.00634293	-6.66e-05
1254	rs29758048	3	15.9427	2.32149	0.136438	0.369407	0.0264673	0.333743	0.0394226	0.33864	0.029824	0.0115208	-0.00173078	0.386659	0.042197	0.137875	0.860516	0.140865	-0.00132561
1255	rs48778165	3	16.1242	2.32149	0.136438	0.369407	0.0264673	0.333743	0.0394226	0.33864	0.029824	0.0115208	-0.00173078	0.386659	0.042197	0.137875	0.860516	0.140865	-0.00132561
1256	rs49436843	3	16.2672	2.32149	0.136438	0.369407	0.0264673	0.333743	0.0394226	0.33864	0.029824	0.0115208	-0.00173078	0.386659	0.042197	0.137875	0.860516	0.140865	-0.00132561
1257	rs29759374	3	16.4902	2.32149	0.136438	0.369407	0.0264673	0.333743	0.0394226	0.33864	0.029824	0.0115208	-0.00173078	0.386659	0.042197	0.137875	0.860516	0.140865	-0.00132561
1258	rs29763821	3	17.0635	2.32149	0.136438	0.369407	0.0264673	0.333743	0.0394226	0.33864	0.029824	0.0115208	-0.00173078	0.386659	0.042197	0.137875	0.860516	0.140865	-0.00132561
1259	rs29763819	3	17.0644	2.32149	0.136438	0.369407	0.0264673	0.333743	0.0394226	0.33864	0.029824	0.0115208	-0.00173078	0.386659	0.042197	0.137875	0.860516	0.140865	-0.00132561
1260	rs29760461	3	17.1017	2.32149	0.136438	0.369407	0.0264673	0.333743	0.0394226	0.33864	0.029824	0.0115208	-0.00173078	0.386659	0.042197	0.137875	0.860516	0.140865	-0.00132561
1261	rs48256193	3	17.2106	2.32149	0.136438	0.369407	0.0264673	0.333743	0.0394226	0.33864	0.029824	0.0115208	-0.00173078	0.386659	0.042197	0.137875	0.860516	0.140865	-0.00132561
1262	rs3657509	3	17.4826	2.32149	0.136438	0.369407	0.0264673	0.333743	0.0394226	0.33864	0.029824	0.0115208	-0.00173078	0.386659	0.042197	0.137875	0.860516	0.140865	-0.00132561
1263	rs33460235	3	17.5402	2.32149	0.136438	0.369407	0.0264673	0.333743	0.0394226	0.33864	0.029824	0.0115208	-0.00173078	0.386659	0.042197	0.137875	0.860516	0.140865	-0.00132561
1264	rs3696263	3	17.872	2.32149	0.136438	0.369407	0.0264673	0.333743	0.0394226	0.33864	0.029824	0.0115208	-0.00173078	0.386659	0.042197	0.137875	0.860516	0.140865	-0.00132561
1265	rs30516054	3	17.8867	2.32149	0.136438	0.369407	0.0264673	0.333743	0.0394226	0.33864	0.029824	0.0115208	-0.00173078	0.386659	0.042197	0.137875	0.860516	0.140865	-0.00132561
1266	rs50722080	3	18.6392	2.32149	0.136438	0.369407	0.0264673	0.333743	0.0394226	0.33864	0.029824	0.0115208	-0.00173078	0.386659	0.042197	0.137875	0.860516	0.140865	-0.00132561
1267	rs51164775	3	18.7091	1.72779	0.119398	0.413787	0.0297975	0.266945	0.0340906	0.141119	0.0148315	0.339872	-0.0403016	0.287341	0.0344689	0.262301	0.5812	0.0832788	-0.000844154
1268	rs230252925	3	18.7105	1.61545	0.112511	0.675387	0.0417309	0.392807	0.0453273	0.448499	0.0375143	0.0881072	-0.012411	0.619388	0.060765	0.125686	0.900712	0.172988	0.00159825
1269	rs6248165	3	18.8683	1.61545	0.112511	0.675387	0.0417309	0.392807	0.0453273	0.448499	0.0375143	0.0881072	-0.012411	0.619388	0.060765	0.125686	0.900712	0.172988	0.00159825
1270	rs31338665	3	19.2399	1.61545	0.112511	0.675387	0.0417309	0.392807	0.0453273	0.448499	0.0375143	0.0881072	-0.012411	0.619388	0.060765	0.125686	0.900712	0.172988	0.00159825
1271	rs31390308	3	19.4952	1.61427	0.106253	0.721706	0.0414738	0.309709	0.0356244	0.238734	0.0216243	0.0624853	0.00864055	0.393755	0.0412107	0.221089	0.655432	0.133557	0.00123698
1272	rs31435372	3	19.6936	1.22153	0.0905771	0.655108	0.0392552	0.164278	0.0212797	0.195622	0.0185282	0.0685561	0.00955571	0.261649	0.0301411	0.46022	0.337035	0.13271	0.00124328
1273	rs31720737	3	20.6471	0.687993	0.0617621	0.496803	0.0321587	0.0763581	0.0107296	0.112338	0.0114392	0.124677	-0.0165509	0.0772444	0.0103537	0.840309	0.075561	0.242519	0.00208443
1274	rs30655381	3	20.654	0.687993	0.0617621	0.496803	0.0321587	0.0763581	0.0107296	0.112338	0.0114392	0.124677	-0.0165509	0.0772444	0.0103537	0.840309	0.075561	0.242519	0.00208443
1275	rs30152977	3	20.8207	0.687993	0.0617621	0.496803	0.0321587	0.0763581	0.0107296	0.112338	0.0114392	0.124677	-0.0165509	0.0772444	0.0103537	0.840309	0.075561	0.242519	0.00208443
1276	rs30807755	3	21.0266	0.687993	0.0617621	0.496803	0.0321587	0.0763581	0.0107296	0.112338	0.0114392	0.124677	-0.0165509	0.0772444	0.0103537	0.840309	0.075561	0.242519	0.00208443
1277	rs30906059	3	21.3456	0.687993	0.0617621	0.496803	0.0321587	0.0763581	0.0107296	0.112338	0.0114392	0.124677	-0.0165509	0.0772444	0.0103537	0.840309	0.075561	0.242519	0.00208443
1278	rs30603946	3	21.3518	0.687993	0.0617621	0.496803	0.0321587	0.0763581	0.0107296	0.112338	0.0114392	0.124677	-0.0165509	0.0772444	0.0103537	0.840309	0.075561	0.242519	0.00208443
1279	rs13477011	3	21.3668	0.412563	0.041849	0.420558	0.0279945	0.0312184	-0.00453216	0.0721529	0.00751197	0.117612	-0.0155305	0.013217	-0.00186552	0.960752	0.0173889	0.23739	0.00203214
1280	rs30264081	3	22.0357	0.412563	0.041849	0.420558	0.0279945	0.0312184	-0.00453216	0.0721529	0.00751197	0.117612	-0.0155305	0.013217	-0.00186552	0.960752	0.0173889	0.23739	0.00203214
1281	rs31640914	3	23.4392	0.412563	0.041849	0.420558	0.0279945	0.0312184	-0.00453216	0.0721529	0.00751197	0.117612	-0.0155305	0.013217	-0.00186552	0.960752	0.0173889	0.23739	0.00203214
1282	rs31043210	3	25.0411	0.570022	0.0529103	0.349786	0.0242039	0.102034	0.0137638	0.130776	0.012891	0.132858	0.017088	0.0669087	-0.00890693	0.904157	0.043756	0.364309	0.00283888
1283	UNC030022855	3	26.1796	0.570022	0.0529103	0.349786	0.0242039	0.102034	0.0137638	0.130776	0.012891	0.132858	0.017088	0.0669087	-0.00890693	0.904157	0.043756	0.364309	0.00283888
1284	rs36267153	3	26.1847	0.570022	0.0529103	0.349786	0.0242039	0.102034	0.0137638	0.130776	0.012891	0.132858	0.017088	0.0669087	-0.00890693	0.904157	0.043756	0.364309	0.00283888
1285	rs37911920	3	26.2276	0.570022	0.0529103	0.349786	0.0242039	0.102034	0.0137638	0.130776	0.012891	0.132858	0.017088	0.0669087	-0.00890693	0.904157	0.043756	0.364309	0.00283888
1286	rs30745460	3	26.3316	0.570022	0.0529103	0.349786	0.0242039	0.102034	0.0137638	0.130776	0.012891	0.132858	0.017088	0.0669087	-0.00890693	0.904157	0.043756	0.364309	0.00283888
1287	rs50207948	3	27.0362	0.570022	0.0529103	0.349786	0.0242039	0.102034	0.0137638	0.130776	0.012891	0.132858	0.017088	0.0669087	-0.00890693	0.904157	0.043756	0.364309	0.00283888
1288	rs6394483	3	27.192	0.570022	0.0529103	0.349786	0.0242039	0.102034	0.0137638	0.130776	0.012891	0.132858	0.017088	0.0669087	-0.00890693	0.904157	0.043756	0.364309	0.00283888
1289	rs30743109	3	27.5867	0.570022	0.0529103	0.349786	0.0242039	0.102034	0.0137638	0.130776	0.012891	0.132858	0.017088	0.0669087	-0.00890693	0.904157	0.043756	0.364309	0.00283888
1290	rs46285099	3	27.8054	0.570022	0.0529103	0.349786	0.0242039	0.102034	0.0137638	0.130776	0.012891	0.132858	0.017088	0.0669087	-0.00890693	0.904157	0.043756	0.364309	0.00283888
1291	rs29598546	3	27.9607	0.570022	0.0529103	0.349786	0.0242039	0.102034	0.0137638	0.130776	0.012891	0.132858	0.017088	0.0669087	-0.00890693	0.904157	0.043756	0.364309	0.00283888
1292	rs29607377	3	28.0182	0.570022	0.0529103	0.349786	0.0242039	0.102034	0.0137638	0.130776	0.012891	0.132858	0.017088	0.0669087	-0.00890693	0.904157	0.043756	0.364309	0.00283888
1293	rs29637681	3	28.1405	0.570022	0.0529103	0.349786	0.0242039	0.102034	0.0137638	0.130776	0.012891	0.132858	0.017088	0.0669087	-0.00890693	0.904157	0.043756	0.364309	0.00283888
1294	rs29645340	3	28.1636	0.494048	0.0491717	0.163421	0.013301	0.00660901	0.00101429	0.0279283	-0.0031305	0.155049	0.0200404	0.0840319	0.011303	0.977665	0.00980988	0.902949	0.00550941
1295	rs31472523	3	28.2754	0.494048	0.0491717	0.163421	0.013301	0.00660901	0.00101429	0.0279283	-0.0031305	0.155049	0.0200404	0.0840319	0.011303	0.977665	0.00980988	0.902949	0.00550941
1296	rs29646228	3	28.3361	0.224133	0.0255881	0.0456582	-0.00404452	0.320838	-0.0370814	0.268021	-0.0239302	0.0512223	0.00713131	0.0779819	-0.0102896	0.971369	0.0126158	0.559483	0.00385475
1297	rs29648351	3	28.3809	0.224133	0.0255881	0.0456582	-0.00404452	0.320838	-0.0370814	0.268021	-0.0239302	0.0512223	0.00713131	0.0779819	-0.0102896	0.971369	0.0126158	0.559483	0.00385475
1298	rs52350553	3	28.3942	0.224133	0.0255881	0.0456582	-0.00404452	0.320838	-0.0370814	0.268021	-0.0239302	0.0512223	0.00713131	0.0779819	-0.0102896	0.971369	0.0126158	0.559483	0.00385475
1299	rs46109272	3	28.6508	0.224133	0.0255881	0.0456582	-0.00404452	0.320838	-0.0370814	0.268021	-0.0239302	0.0512223	0.00713131	0.0779819	-0.0102896	0.971369	0.0126158	0.559483	0.00385475
1300	rs6260196	3	28.728	0.224133	0.0255881	0.0456582	-0.00404452	0.320838	-0.0370814	0.268021	-0.0239302	0.0512223	0.00713131	0.0779819	-0.0102896	0.971369	0.0126158	0.559483	0.00385475
1301	rs3661905	3	31.8535	0.224133	0.0255881	0.0456582	-0.00404452	0.320838	-0.0370814	0.268021	-0.0239302	0.0512223	0.00713131	0.0779819	-0.0102896	0.971369	0.0126158	0.559483	0.00385475
1302	rs29861654	3	32.3798	0.224133	0.0255881	0.0456582	-0.00404452	0.320838	-0.0370814	0.268021	-0.0239302	0.0512223	0.00713131	0.0779819	-0.0102896	0.971369	0.0126158	0.559483	0.00385475
1303	rs31640653	3	32.4033	0.224133	0.0255881	0.0456582	-0.00404452	0.320838	-0.0370814	0.268021	-0.0239302	0.0512223	0.00713131	0.0779819	-0.0102896	0.971369	0.0126158	0.559483	0.00385475
1304	rs30704785	3	32.4957	0.224133	0.0255881	0.0456582	-0.00404452	0.320838	-0.0370814	0.268021	-0.0239302	0.0512223	0.00713131	0.0779819	-0.0102896	0.971369	0.0126158	0.559483	0.00385475
1305	rs30991994	3	33.5	0.224133	0.0255881	0.0456582	-0.00404452	0.320838	-0.0370814	0.268021	-0.0239302	0.0512223	0.00713131	0.0779819	-0.0102896	0.971369	0.0126158	0.559483	0.00385475
1306	rs31295686	3	33.7542	0.239058	0.0263986	0.243464	0.0174811	0.0615346	-0.00841891	0.109282	0.010649	0.118131	0.0150376	0.216922	0.0245899	0.971304	0.0126446	0.339101	0.00261912
1307	rs29894063	3	33.8933	0.239058	0.0263986	0.243464	0.0174811	0.0615346	-0.00841891	0.109282	0.010649	0.118131	0.0150376	0.216922	0.0245899	0.971304	0.0126446	0.339101	0.00261912
1308	rs3664070	3	33.9147	0.239058	0.0263986	0.243464	0.0174811	0.0615346	-0.00841891	0.109282	0.010649	0.118131	0.0150376	0.216922	0.0245899	0.971304	0.0126446	0.339101	0.00261912
1309	rs29901264	3	33.9211	0.239058	0.0263986	0.243464	0.0174811	0.0615346	-0.00841891	0.109282	0.010649	0.118131	0.0150376	0.216922	0.0245899	0.971304	0.0126446	0.339101	0.00261912
1310	rs31288331	3	33.958	0.239058	0.0263986	0.243464	0.0174811	0.0615346	-0.00841891	0.109282	0.010649	0.118131	0.0150376	0.216922	0.0245899	0.971304	0.0126446	0.339101	0.00261912
1311	rs4223883	3	34.0657	0.239058	0.0263986	0.243464	0.0174811	0.0615346	-0.00841891	0.109282	0.010649	0.118131	0.0150376	0.216922	0.0245899	0.971304	0.0126446	0.339101	0.00261912
1312	rs13477058	3	35.5597	0.239058	0.0263986	0.243464	0.0174811	0.0615346	-0.00841891	0.109282	0.010649	0.118131	0.0150376	0.216922	0.0245899	0.971304	0.0126446	0.339101	0.00261912
1313	rs31381989	3	35.7221	0.239058	0.0263986	0.243464	0.0174811	0.0615346	-0.00841891	0.109282	0.010649	0.118131	0.0150376	0.216922	0.0245899	0.971304	0.0126446	0.339101	0.00261912
1314	rs30698864	3	36.5433	0.936603	0.0734958	0.190747	0.0146329	0.0472319	0.00664779	0.542674	0.04037	0.496333	0.0494583	0.0575918	-0.00760091	0.575745	0.23977	0.274815	-0.00222837
1315	rs3151914	3	36.5994	0.936603	0.0734958	0.190747	0.0146329	0.0472319	0.00664779	0.542674	0.04037	0.496333	0.0494583	0.0575918	-0.00760091	0.575745	0.23977	0.274815	-0.00222837
1316	rs3151902	3	36.604	0.936603	0.0734958	0.190747	0.0146329	0.0472319	0.00664779	0.542674	0.04037	0.496333	0.0494583	0.0575918	-0.00760091	0.575745	0.23977	0.274815	-0.00222837
1317	rs29983817	3	36.7495	0.936603	0.0734958	0.190747	0.0146329	0.0472319	0.00664779	0.542674	0.04037	0.496333	0.0494583	0.0575918	-0.00760091	0.575745	0.23977	0.274815	-0.00222837
1318	UNCHS008426	3	36.8315	0.936603	0.0734958	0.190747	0.0146329	0.0472319	0.00664779	0.542674	0.04037	0.496333	0.0494583	0.0575918	-0.00760091	0.575745	0.23977	0.274815	-0.00222837
1319	rs3151465	3	36.8348	0.936603	0.0734958	0.190747	0.0146329	0.0472319	0.00664779	0.542674	0.04037	0.496333	0.0494583	0.0575918	-0.00760091	0.575745	0.23977	0.274815	-0.00222837
1320	UNCHS008443	3	37.3762	0.936603	0.0734958	0.190747	0.0146329	0.0472319	0.00664779	0.542674	0.04037	0.496333	0.0494583	0.0575918	-0.00760091	0.575745	0.23977	0.274815	-0.00222837
1321	rs30048108	3	37.379	0.936603	0.0734958	0.190747	0.0146329	0.0472319	0.00664779	0.542674	0.04037	0.496333	0.0494583	0.0575918	-0.00760091	0.575745	0.23977	0.274815	-0.00222837
1322	UNC5057834	3	37.3884	0.936603	0.0734958	0.190747	0.0146329	0.0472319	0.00664779	0.542674	0.04037	0.496333	0.0494583	0.0575918	-0.00760091	0.575745	0.23977	0.274815	-0.00222837
1323	rs3141366	3	37.4273	0.936603	0.0734958	0.190747	0.0146329	0.0472319	0.00664779	0.542674	0.04037	0.496333	0.0494583	0.0575918	-0.00760091	0.575745	0.23977	0.274815	-0.00222837
1324	rs30082219	3	37.5839	0.936603	0.0734958	0.190747	0.0146329	0.0472319	0.00664779	0.542674	0.04037	0.496333	0.0494583	0.0575918	-0.00760091	0.575745	0.23977	0.274815	-0.00222837
1325	rs30089442	3	37.5927	0.936603	0.0734958	0.190747	0.0146329	0.0472319	0.00664779	0.542674	0.04037	0.496333	0.0494583	0.0575918	-0.00760091	0.575745	0.23977	0.274815	-0.00222837
1326	rs50091922	3	37.8639	0.936603	0.0734958	0.190747	0.0146329	0.0472319	0.00664779	0.542674	0.04037	0.496333	0.0494583	0.0575918	-0.00760091	0.575745	0.23977	0.274815	-0.00222837
1327	rs30801829	3	37.8668	0.936603	0.0734958	0.190747	0.0146329	0.0472319	0.00664779	0.542674	0.04037	0.496333	0.0494583	0.0575918	-0.00760091	0.575745	0.23977	0.274815	-0.00222837
1328	rs31523971	3	38.4831	0.936603	0.0734958	0.190747	0.0146329	0.0472319	0.00664779	0.542674	0.04037	0.496333	0.0494583	0.0575918	-0.00760091	0.575745	0.23977	0.274815	-0.00222837
1329	rs51367062	3	38.522	0.936603	0.0734958	0.190747	0.0146329	0.0472319	0.00664779	0.542674	0.04037	0.496333	0.0494583	0.0575918	-0.00760091	0.575745	0.23977	0.274815	-0.00222837
1330	rs31525867	3	38.5235	0.936603	0.0734958	0.190747	0.0146329	0.0472319	0.00664779	0.542674	0.04037	0.496333	0.0494583	0.0575918	-0.00760091	0.575745	0.23977	0.274815	-0.00222837
1331	rs46477289	3	38.5278	0.557492	0.0515029	0.211434	0.0159905	0.00075546	-0.000112033	0.30733	0.0261652	0.133853	0.0170267	0.134529	-0.0165932	0.905893	0.042923	0.206363	-0.00177011
1332	rs51901876	3	38.864	0.557492	0.0515029	0.211434	0.0159905	0.00075546	-0.000112033	0.30733	0.0261652	0.133853	0.0170267	0.134529	-0.0165932	0.905893	0.042923	0.206363	-0.00177011
1333	rs6274061	3	38.8899	0.557492	0.0515029	0.211434	0.0159905	0.00075546	-0.000112033	0.30733	0.0261652	0.133853	0.0170267	0.134529	-0.0165932	0.905893	0.042923	0.206363	-0.00177011
1334	rs46594852	3	38.9238	0.557492	0.0515029	0.211434	0.0159905	0.00075546	-0.000112033	0.30733	0.0261652	0.133853	0.0170267	0.134529	-0.0165932	0.905893	0.042923	0.206363	-0.00177011
1335	rs31313193	3	39.286	0.525094	0.0520399	0.167841	0.0138307	0.0355949	0.00535715	0.537203	0.0421886	0.0171486	-0.00256129	0.0252717	-0.00363436	0.914854	0.0386484	0.180074	-0.00164637
1336	rs46436000	3	39.6362	0.525094	0.0520399	0.167841	0.0138307	0.0355949	0.00535715	0.537203	0.0421886	0.0171486	-0.00256129	0.0252717	-0.00363436	0.914854	0.0386484	0.180074	-0.00164637
1337	rs48319012	3	39.6364	0.525094	0.0520399	0.167841	0.0138307	0.0355949	0.00535715	0.537203	0.0421886	0.0171486	-0.00256129	0.0252717	-0.00363436	0.914854	0.0386484	0.180074	-0.00164637
1338	rs31183617	3	39.6508	0.66161	0.0641754	0.376208	0.0278033	0.04662	0.00723957	0.903625	0.0629567	0.070448	0.0103172	0.299376	0.035728	0.541085	0.266734	0.223512	-0.00203578
1339	rs50354672	3	40.0197	0.66161	0.0641754	0.376208	0.0278033	0.04662	0.00723957	0.903625	0.0629567	0.070448	0.0103172	0.299376	0.035728	0.541085	0.266734	0.223512	-0.00203578
1340	rs6324747	3	40.0325	0.66161	0.0641754	0.376208	0.0278033	0.04662	0.00723957	0.903625	0.0629567	0.070448	0.0103172	0.299376	0.035728	0.541085	0.266734	0.223512	-0.00203578
1341	rs6248503	3	40.3239	0.66161	0.0641754	0.376208	0.0278033	0.04662	0.00723957	0.903625	0.0629567	0.070448	0.0103172	0.299376	0.035728	0.541085	0.266734	0.223512	-0.00203578
1342	rs30504535	3	40.5036	0.607598	0.058347	0.382405	0.0273322	0.156539	0.0211728	0.63665	0.0477843	0.0981838	0.0136816	0.437119	0.0464923	0.556779	0.254318	0.221019	-0.00198935
1343	rs51693383	3	41.2117	0.607598	0.058347	0.382405	0.0273322	0.156539	0.0211728	0.63665	0.0477843	0.0981838	0.0136816	0.437119	0.0464923	0.556779	0.254318	0.221019	-0.00198935
1344	rs50859505	3	41.3563	0.607598	0.058347	0.382405	0.0273322	0.156539	0.0211728	0.63665	0.0477843	0.0981838	0.0136816	0.437119	0.0464923	0.556779	0.254318	0.221019	-0.00198935
1345	rs49738931	3	41.5421	1.09194	0.0852156	0.513963	0.0334574	0.251909	0.0309043	0.757664	0.0526847	0.347879	0.0395373	0.706245	0.064429	0.153431	0.814088	0.341324	-0.00277698
1346	rs30805858	3	41.5791	1.09194	0.0852156	0.513963	0.0334574	0.251909	0.0309043	0.757664	0.0526847	0.347879	0.0395373	0.706245	0.064429	0.153431	0.814088	0.341324	-0.00277698
1347	rs31187985	3	41.9218	1.09194	0.0852156	0.513963	0.0334574	0.251909	0.0309043	0.757664	0.0526847	0.347879	0.0395373	0.706245	0.064429	0.153431	0.814088	0.341324	-0.00277698
1348	rs214051626	3	42.1491	1.1834	0.0923161	0.291327	0.0222139	0.147868	0.0202689	0.378686	0.0327551	0.106289	0.0147099	0.364124	0.0405896	0.496449	0.304125	0.795235	-0.00522331
1349	rs51693979	3	42.5593	1.08643	0.0882384	0.263574	0.0206908	0.235318	0.0306475	0.419085	0.0359588	0.104631	0.0146082	0.358447	0.0405574	0.498077	0.302703	0.878082	-0.00563173
1350	rs30351060	3	43.1382	1.08643	0.0882384	0.263574	0.0206908	0.235318	0.0306475	0.419085	0.0359588	0.104631	0.0146082	0.358447	0.0405574	0.498077	0.302703	0.878082	-0.00563173
1351	rs46019336	3	45.9395	1.08643	0.0882384	0.263574	0.0206908	0.235318	0.0306475	0.419085	0.0359588	0.104631	0.0146082	0.358447	0.0405574	0.498077	0.302703	0.878082	-0.00563173
1352	rs31434107	3	46.1512	1.08643	0.0882384	0.263574	0.0206908	0.235318	0.0306475	0.419085	0.0359588	0.104631	0.0146082	0.358447	0.0405574	0.498077	0.302703	0.878082	-0.00563173
1353	rs30302627	3	46.1565	0.970272	0.0815127	0.232496	0.0186111	0.329437	0.0402913	0.452787	0.0381291	0.101864	0.0142246	0.346496	0.039395	0.511352	0.29128	0.955846	-0.00596421
1354	rs31490033	3	46.1709	0.970272	0.0815127	0.232496	0.0186111	0.329437	0.0402913	0.452787	0.0381291	0.101864	0.0142246	0.346496	0.039395	0.511352	0.29128	0.955846	-0.00596421
1355	rs31287802	3	46.4058	0.970272	0.0815127	0.232496	0.0186111	0.329437	0.0402913	0.452787	0.0381291	0.101864	0.0142246	0.346496	0.039395	0.511352	0.29128	0.955846	-0.00596421
1356	rs30659567	3	46.8095	0.970272	0.0815127	0.232496	0.0186111	0.329437	0.0402913	0.452787	0.0381291	0.101864	0.0142246	0.346496	0.039395	0.511352	0.29128	0.955846	-0.00596421
1357	UNC5191765	3	47.4757	0.970272	0.0815127	0.232496	0.0186111	0.329437	0.0402913	0.452787	0.0381291	0.101864	0.0142246	0.346496	0.039395	0.511352	0.29128	0.955846	-0.00596421
1358	rs108292324	3	47.9941	0.970272	0.0815127	0.232496	0.0186111	0.329437	0.0402913	0.452787	0.0381291	0.101864	0.0142246	0.346496	0.039395	0.511352	0.29128	0.955846	-0.00596421
1359	rs46267886	3	48.0768	0.970272	0.0815127	0.232496	0.0186111	0.329437	0.0402913	0.452787	0.0381291	0.101864	0.0142246	0.346496	0.039395	0.511352	0.29128	0.955846	-0.00596421
1360	rs30053034	3	50.2973	0.970272	0.0815127	0.232496	0.0186111	0.329437	0.0402913	0.452787	0.0381291	0.101864	0.0142246	0.346496	0.039395	0.511352	0.29128	0.955846	-0.00596421
1361	rs30046776	3	50.3098	0.970272	0.0815127	0.232496	0.0186111	0.329437	0.0402913	0.452787	0.0381291	0.101864	0.0142246	0.346496	0.039395	0.511352	0.29128	0.955846	-0.00596421
1362	rs31005014	3	51.1875	0.970272	0.0815127	0.232496	0.0186111	0.329437	0.0402913	0.452787	0.0381291	0.101864	0.0142246	0.346496	0.039395	0.511352	0.29128	0.955846	-0.00596421
1363	rs30326801	3	53.0533	1.29757	0.0970793	0.377441	0.027342	0.810471	0.0778681	1.06733	0.0691585	0.307669	0.0365091	0.483744	0.0506244	0.0669745	1.17409	0.544728	-0.00396064
1364	rs227777266	3	53.2462	2.62738	0.142458	0.611017	0.0387561	1.36027	0.107831	0.924257	0.0618018	0.837052	0.0759933	0.908137	0.077971	0.000816991	3.08778	0.309321	-0.00255045
1365	rs13477113	3	53.2697	3.74086	0.169712	1.44493	0.0690701	2.93641	0.168451	1.78054	0.0932962	0.886694	0.0790732	1.54295	0.108675	8.61528e-08	7.06473	0.323904	-0.002668
1366	rs30374445	3	53.3047	3.74086	0.169712	1.44493	0.0690701	2.93641	0.168451	1.78054	0.0932962	0.886694	0.0790732	1.54295	0.108675	8.61528e-08	7.06473	0.323904	-0.002668
1367	rs30400781	3	53.5994	3.74086	0.169712	1.44493	0.0690701	2.93641	0.168451	1.78054	0.0932962	0.886694	0.0790732	1.54295	0.108675	8.61528e-08	7.06473	0.323904	-0.002668
1368	rs30450303	3	54.0284	3.74086	0.169712	1.44493	0.0690701	2.93641	0.168451	1.78054	0.0932962	0.886694	0.0790732	1.54295	0.108675	8.61528e-08	7.06473	0.323904	-0.002668
1369	rs30465721	3	54.2206	3.74086	0.169712	1.44493	0.0690701	2.93641	0.168451	1.78054	0.0932962	0.886694	0.0790732	1.54295	0.108675	8.61528e-08	7.06473	0.323904	-0.002668
1370	rs30014314	3	54.2209	3.74086	0.169712	1.44493	0.0690701	2.93641	0.168451	1.78054	0.0932962	0.886694	0.0790732	1.54295	0.108675	8.61528e-08	7.06473	0.323904	-0.002668
1371	rs30469949	3	54.2804	3.74086	0.169712	1.44493	0.0690701	2.93641	0.168451	1.78054	0.0932962	0.886694	0.0790732	1.54295	0.108675	8.61528e-08	7.06473	0.323904	-0.002668
1372	rs30480648	3	54.4232	3.74086	0.169712	1.44493	0.0690701	2.93641	0.168451	1.78054	0.0932962	0.886694	0.0790732	1.54295	0.108675	8.61528e-08	7.06473	0.323904	-0.002668
1373	rs30519692	3	54.8158	3.74086	0.169712	1.44493	0.0690701	2.93641	0.168451	1.78054	0.0932962	0.886694	0.0790732	1.54295	0.108675	8.61528e-08	7.06473	0.323904	-0.002668
1374	rs30942882	3	54.8167	2.84347	0.147125	1.18135	0.0602261	2.43374	0.149785	1.02016	0.065101	0.776198	0.0719774	1.7377	0.114949	6.88975e-06	5.1618	0.386232	-0.00309029
1375	rs30832579	3	54.8196	2.84347	0.147125	1.18135	0.0602261	2.43374	0.149785	1.02016	0.065101	0.776198	0.0719774	1.7377	0.114949	6.88975e-06	5.1618	0.386232	-0.00309029
1376	rs30529527	3	54.9424	0.929106	0.0791972	0.751644	0.0460022	1.33702	0.108789	0.438021	0.0370518	0.0614937	0.00896406	1.16872	0.0933642	0.0425075	1.37153	0.0564847	0.000593376
1377	rs30535654	3	55.0275	0.542355	0.0573972	0.353659	0.0274713	1.34266	0.114703	0.433032	0.0386864	0.113528	-0.0162501	0.665626	0.0672685	0.196243	0.707207	0.0237699	-0.000263417
1378	rs30544682	3	55.0448	0.542355	0.0573972	0.353659	0.0274713	1.34266	0.114703	0.433032	0.0386864	0.113528	-0.0162501	0.665626	0.0672685	0.196243	0.707207	0.0237699	-0.000263417
1379	rs4223969	3	55.0493	0.542355	0.0573972	0.353659	0.0274713	1.34266	0.114703	0.433032	0.0386864	0.113528	-0.0162501	0.665626	0.0672685	0.196243	0.707207	0.0237699	-0.000263417
1380	rs30584261	3	55.4771	0.542355	0.0573972	0.353659	0.0274713	1.34266	0.114703	0.433032	0.0386864	0.113528	-0.0162501	0.665626	0.0672685	0.196243	0.707207	0.0237699	-0.000263417
1381	rs30357346	3	55.4918	0.542355	0.0573972	0.353659	0.0274713	1.34266	0.114703	0.433032	0.0386864	0.113528	-0.0162501	0.665626	0.0672685	0.196243	0.707207	0.0237699	-0.000263417
1382	rs30667917	3	56.4502	0.542355	0.0573972	0.353659	0.0274713	1.34266	0.114703	0.433032	0.0386864	0.113528	-0.0162501	0.665626	0.0672685	0.196243	0.707207	0.0237699	-0.000263417
1383	rs30159374	3	56.4663	0.220889	0.0281967	0.347257	0.0269958	0.889554	0.0872943	0.427481	0.0381755	0.195021	-0.0261371	0.689322	0.0687411	0.387162	0.412107	0.0479855	0.000518578
1384	rs6319642	3	56.4915	0.220889	0.0281967	0.347257	0.0269958	0.889554	0.0872943	0.427481	0.0381755	0.195021	-0.0261371	0.689322	0.0687411	0.387162	0.412107	0.0479855	0.000518578
1385	rs31596392	3	56.7078	0.237157	0.0301227	0.32546	0.0258392	0.749036	0.0780726	0.424236	0.0382007	0.239957	-0.0312855	0.520306	0.0565739	0.487022	0.312451	0.0860171	-0.000900621
1386	rs47166276	3	57.3132	0.0538332	0.00808575	0.268507	0.022429	0.527524	0.0615392	0.369324	0.0348383	0.235883	-0.0312236	0.358686	0.0431986	0.757	0.120904	0.089157	-0.000937046
1387	rs30893154	3	57.3349	0.0538332	0.00808575	0.268507	0.022429	0.527524	0.0615392	0.369324	0.0348383	0.235883	-0.0312236	0.358686	0.0431986	0.757	0.120904	0.089157	-0.000937046
1388	rs31153645	3	57.3353	0.102304	-0.0144545	0.206568	0.0177727	0.321097	0.0413385	0.30425	0.0294509	0.224532	-0.0295619	0.208566	0.0273591	0.900391	0.0455686	0.0904983	-0.000938984
1389	rs46360803	3	57.4426	0.102304	-0.0144545	0.206568	0.0177727	0.321097	0.0413385	0.30425	0.0294509	0.224532	-0.0295619	0.208566	0.0273591	0.900391	0.0455686	0.0904983	-0.000938984
1390	rs30723371	3	57.4443	0.102304	-0.0144545	0.206568	0.0177727	0.321097	0.0413385	0.30425	0.0294509	0.224532	-0.0295619	0.208566	0.0273591	0.900391	0.0455686	0.0904983	-0.000938984
1391	rs51859403	3	57.6096	0.0550428	-0.00888335	0.601531	0.0448372	0.35908	0.0492959	0.554545	0.0510256	0.159425	-0.0239104	0.7162	0.0771127	0.506488	0.295431	0.0587016	0.000675641
1392	rs6334912	3	57.6734	0.333297	0.0406382	2.1011	0.0917873	1.53694	0.127989	1.42573	0.0898206	0.521584	0.0592742	1.96318	0.133606	0.000290213	3.53728	0.0470943	-0.000520425
1393	rs31737774	3	57.8204	0.333297	0.0406382	2.1011	0.0917873	1.53694	0.127989	1.42573	0.0898206	0.521584	0.0592742	1.96318	0.133606	0.000290213	3.53728	0.0470943	-0.000520425
1394	rs6363066	3	57.8233	0.323484	0.0388185	1.77575	0.0815606	1.30957	0.113436	1.27843	0.0821647	0.570741	0.0621365	1.67904	0.119747	0.00141051	2.85062	0.115592	-0.00117863
1395	rs30725761	3	58.0218	0.323484	0.0388185	1.77575	0.0815606	1.30957	0.113436	1.27843	0.0821647	0.570741	0.0621365	1.67904	0.119747	0.00141051	2.85062	0.115592	-0.00117863
1396	rs6301139	3	58.4899	0.323484	0.0388185	1.77575	0.0815606	1.30957	0.113436	1.27843	0.0821647	0.570741	0.0621365	1.67904	0.119747	0.00141051	2.85062	0.115592	-0.00117863
1397	UNC5348732	3	58.4776	0.0989211	0.0140069	2.12702	0.0900981	1.1201	0.102156	0.964898	0.068181	0.777923	0.0771158	1.02427	0.0882418	0.00525558	2.27938	0.322184	-0.00282422
1398	rs30401146	3	59.1577	0.323484	0.0388185	1.77575	0.0815606	1.30957	0.113436	1.27843	0.0821647	0.570741	0.0621365	1.67904	0.119747	0.00141051	2.85062	0.115592	-0.00117863
1399	rs30810079	3	61.2185	0.491276	0.0545703	1.97201	0.0882045	0.98292	0.095205	1.19346	0.0795729	0.587423	0.064005	1.75825	0.125441	0.00130323	2.88498	0.0348492	-0.000386792
1400	rs52481290	3	61.2196	0.449674	0.0498695	2.57843	0.0990991	1.17792	0.104279	1.86644	0.101393	1.02527	0.0917823	2.56065	0.150446	1.26551e-05	4.89774	0.251757	0.00231332
1401	rs47064658	3	61.2201	0.449674	0.0498695	2.57843	0.0990991	1.17792	0.104279	1.86644	0.101393	1.02527	0.0917823	2.56065	0.150446	1.26551e-05	4.89774	0.251757	0.00231332
1402	rs13477144	3	61.2682	0.449674	0.0498695	2.57843	0.0990991	1.17792	0.104279	1.86644	0.101393	1.02527	0.0917823	2.56065	0.150446	1.26551e-05	4.89774	0.251757	0.00231332
1403	rs107736772	3	62.3917	0.449674	0.0498695	2.57843	0.0990991	1.17792	0.104279	1.86644	0.101393	1.02527	0.0917823	2.56065	0.150446	1.26551e-05	4.89774	0.251757	0.00231332
1404	rs6191597	3	62.5839	0.449674	0.0498695	2.57843	0.0990991	1.17792	0.104279	1.86644	0.101393	1.02527	0.0917823	2.56065	0.150446	1.26551e-05	4.89774	0.251757	0.00231332
1405	rs46649841	3	63.5066	0.449674	0.0498695	2.57843	0.0990991	1.17792	0.104279	1.86644	0.101393	1.02527	0.0917823	2.56065	0.150446	1.26551e-05	4.89774	0.251757	0.00231332
1406	rs30886554	3	63.715	0.449674	0.0498695	2.57843	0.0990991	1.17792	0.104279	1.86644	0.101393	1.02527	0.0917823	2.56065	0.150446	1.26551e-05	4.89774	0.251757	0.00231332
1407	rs30259722	3	64.1967	0.449674	0.0498695	2.57843	0.0990991	1.17792	0.104279	1.86644	0.101393	1.02527	0.0917823	2.56065	0.150446	1.26551e-05	4.89774	0.251757	0.00231332
1408	rs6251307	3	64.2923	0.449674	0.0498695	2.57843	0.0990991	1.17792	0.104279	1.86644	0.101393	1.02527	0.0917823	2.56065	0.150446	1.26551e-05	4.89774	0.251757	0.00231332
1409	UNCHS008889	3	64.3356	0.346244	0.0394955	1.37128	0.0676512	0.720967	0.0728273	1.1849	0.074678	0.345134	0.040882	1.78373	0.120208	0.00914341	2.03889	0.0603088	-0.000634127
1410	rs31482508	3	65.4802	0.346244	0.0394955	1.37128	0.0676512	0.720967	0.0728273	1.1849	0.074678	0.345134	0.040882	1.78373	0.120208	0.00914341	2.03889	0.0603088	-0.000634127
1411	rs31239141	3	65.4893	0.346244	0.0394955	1.37128	0.0676512	0.720967	0.0728273	1.1849	0.074678	0.345134	0.040882	1.78373	0.120208	0.00914341	2.03889	0.0603088	-0.000634127
1412	rs51669923	3	65.524	0.375109	0.0422374	1.40782	0.0689898	0.794279	0.0780908	1.19751	0.0752146	0.439936	0.0494477	1.8293	0.12198	0.00585083	2.23278	0.00430967	-4.84e-05
1413	rs31229055	3	65.564	0.60503	0.0576472	1.59143	0.0709235	0.97645	0.085443	1.93337	0.0951075	0.502644	0.0524349	1.4586	0.102657	0.00113859	2.94363	0.0323179	0.000339507
1414	rs31497298	3	65.6587	0.60503	0.0576472	1.59143	0.0709235	0.97645	0.085443	1.93337	0.0951075	0.502644	0.0524349	1.4586	0.102657	0.00113859	2.94363	0.0323179	0.000339507
1415	rs3674751	3	65.6709	0.60503	0.0576472	1.59143	0.0709235	0.97645	0.085443	1.93337	0.0951075	0.502644	0.0524349	1.4586	0.102657	0.00113859	2.94363	0.0323179	0.000339507
1416	rs30357888	3	66.6686	0.60503	0.0576472	1.59143	0.0709235	0.97645	0.085443	1.93337	0.0951075	0.502644	0.0524349	1.4586	0.102657	0.00113859	2.94363	0.0323179	0.000339507
1417	rs30843932	3	67.1684	0.60503	0.0576472	1.59143	0.0709235	0.97645	0.085443	1.93337	0.0951075	0.502644	0.0524349	1.4586	0.102657	0.00113859	2.94363	0.0323179	0.000339507
1418	rs30887094	3	67.2296	0.60503	0.0576472	1.59143	0.0709235	0.97645	0.085443	1.93337	0.0951075	0.502644	0.0524349	1.4586	0.102657	0.00113859	2.94363	0.0323179	0.000339507
1419	rs30890056	3	67.2348	0.60503	0.0576472	1.59143	0.0709235	0.97645	0.085443	1.93337	0.0951075	0.502644	0.0524349	1.4586	0.102657	0.00113859	2.94363	0.0323179	0.000339507
1420	rs30896740	3	67.5013	0.60503	0.0576472	1.59143	0.0709235	0.97645	0.085443	1.93337	0.0951075	0.502644	0.0524349	1.4586	0.102657	0.00113859	2.94363	0.0323179	0.000339507
1421	rs47191211	3	68.0846	0.60503	0.0576472	1.59143	0.0709235	0.97645	0.085443	1.93337	0.0951075	0.502644	0.0524349	1.4586	0.102657	0.00113859	2.94363	0.0323179	0.000339507
1422	rs30546833	3	68.0927	0.531879	0.0513229	1.73852	0.0735671	1.04171	0.087003	1.98081	0.0944341	0.542487	0.0548142	1.00983	0.0795041	0.00163832	2.7856	0.0282602	0.000296308
1423	rs30968839	3	68.1421	0.531879	0.0513229	1.73852	0.0735671	1.04171	0.087003	1.98081	0.0944341	0.542487	0.0548142	1.00983	0.0795041	0.00163832	2.7856	0.0282602	0.000296308
1424	rs3674810	3	68.1428	0.531879	0.0513229	1.73852	0.0735671	1.04171	0.087003	1.98081	0.0944341	0.542487	0.0548142	1.00983	0.0795041	0.00163832	2.7856	0.0282602	0.000296308
1425	rs30973557	3	69.0172	0.569684	0.0559829	1.82089	0.0781803	0.979038	0.0867875	2.32385	0.10713	0.539424	0.0561523	0.94603	0.0788834	0.000947311	3.02351	0.0296932	0.000318166
1426	rs30711071	3	69.0257	0.592141	0.0584158	1.83863	0.0796092	0.881274	0.0821533	2.61487	0.115906	0.521676	0.0552752	0.849277	0.0744124	0.000777513	3.10929	0.0306541	0.000330301
1427	rs31291384	3	69.3588	0.592141	0.0584158	1.83863	0.0796092	0.881274	0.0821533	2.61487	0.115906	0.521676	0.0552752	0.849277	0.0744124	0.000777513	3.10929	0.0306541	0.000330301
1428	rs51960873	3	69.4873	0.592141	0.0584158	1.83863	0.0796092	0.881274	0.0821533	2.61487	0.115906	0.521676	0.0552752	0.849277	0.0744124	0.000777513	3.10929	0.0306541	0.000330301
1429	rs31326636	3	69.5223	0.592141	0.0584158	1.83863	0.0796092	0.881274	0.0821533	2.61487	0.115906	0.521676	0.0552752	0.849277	0.0744124	0.000777513	3.10929	0.0306541	0.000330301
1430	rs31015524	3	69.5264	0.592141	0.0584158	1.83863	0.0796092	0.881274	0.0821533	2.61487	0.115906	0.521676	0.0552752	0.849277	0.0744124	0.000777513	3.10929	0.0306541	0.000330301
1431	rs31426069	3	69.9698	0.592141	0.0584158	1.83863	0.0796092	0.881274	0.0821533	2.61487	0.115906	0.521676	0.0552752	0.849277	0.0744124	0.000777513	3.10929	0.0306541	0.000330301
1432	rs48944333	3	70.0408	0.592141	0.0584158	1.83863	0.0796092	0.881274	0.0821533	2.61487	0.115906	0.521676	0.0552752	0.849277	0.0744124	0.000777513	3.10929	0.0306541	0.000330301
1433	rs51358767	3	70.4744	1.10382	0.0879785	1.68896	0.0751842	0.988692	0.0877326	2.48279	0.111854	1.59999	0.112535	0.950717	0.0791472	5.72687e-05	4.24208	0.110302	-0.00106711
1434	rs31384807	3	70.6165	1.10382	0.0879785	1.68896	0.0751842	0.988692	0.0877326	2.48279	0.111854	1.59999	0.112535	0.950717	0.0791472	5.72687e-05	4.24208	0.110302	-0.00106711
1435	rs6351657	3	72.6587	1.10382	0.0879785	1.68896	0.0751842	0.988692	0.0877326	2.48279	0.111854	1.59999	0.112535	0.950717	0.0791472	5.72687e-05	4.24208	0.110302	-0.00106711
1436	rs51936870	3	72.9065	1.10382	0.0879785	1.68896	0.0751842	0.988692	0.0877326	2.48279	0.111854	1.59999	0.112535	0.950717	0.0791472	5.72687e-05	4.24208	0.110302	-0.00106711
1437	rs31366999	3	74.6167	1.66617	0.112133	1.66817	0.0743865	1.42813	0.110008	2.45504	0.110546	1.77088	0.119468	0.909601	0.0763896	8.18835e-06	5.0868	0.194048	-0.00173841
1438	rs47205918	3	74.704	1.66617	0.112133	1.66817	0.0743865	1.42813	0.110008	2.45504	0.110546	1.77088	0.119468	0.909601	0.0763896	8.18835e-06	5.0868	0.194048	-0.00173841
1439	rs49752901	3	75.4721	1.66617	0.112133	1.66817	0.0743865	1.42813	0.110008	2.45504	0.110546	1.77088	0.119468	0.909601	0.0763896	8.18835e-06	5.0868	0.194048	-0.00173841
1440	rs33861236	3	76.5798	0.822504	0.0739462	1.44322	0.0705274	0.87197	0.0826533	1.82797	0.0971256	1.53527	0.114276	0.523029	0.0535745	0.00122317	2.91251	0.173695	0.00161065
1441	rs220027832	3	76.7302	0.822504	0.0739462	1.44322	0.0705274	0.87197	0.0826533	1.82797	0.0971256	1.53527	0.114276	0.523029	0.0535745	0.00122317	2.91251	0.173695	0.00161065
1442	rs30417021	3	77.2065	0.822504	0.0739462	1.44322	0.0705274	0.87197	0.0826533	1.82797	0.0971256	1.53527	0.114276	0.523029	0.0535745	0.00122317	2.91251	0.173695	0.00161065
1443	rs31124218	3	77.4319	0.822504	0.0739462	1.44322	0.0705274	0.87197	0.0826533	1.82797	0.0971256	1.53527	0.114276	0.523029	0.0535745	0.00122317	2.91251	0.173695	0.00161065
1444	rs265721181	3	79.674	0.822504	0.0739462	1.44322	0.0705274	0.87197	0.0826533	1.82797	0.0971256	1.53527	0.114276	0.523029	0.0535745	0.00122317	2.91251	0.173695	0.00161065
1445	rs108707331	3	81.1923	0.822504	0.0739462	1.44322	0.0705274	0.87197	0.0826533	1.82797	0.0971256	1.53527	0.114276	0.523029	0.0535745	0.00122317	2.91251	0.173695	0.00161065
1446	rs31038721	3	81.2079	0.822504	0.0739462	1.44322	0.0705274	0.87197	0.0826533	1.82797	0.0971256	1.53527	0.114276	0.523029	0.0535745	0.00122317	2.91251	0.173695	0.00161065
1447	rs6196421	3	81.6298	0.822504	0.0739462	1.44322	0.0705274	0.87197	0.0826533	1.82797	0.0971256	1.53527	0.114276	0.523029	0.0535745	0.00122317	2.91251	0.173695	0.00161065
1448	rs3699123	3	82.396	0.923098	0.0779579	1.86974	0.0805302	1.08399	0.0929706	2.39813	0.110278	1.44985	0.108772	0.252886	0.029965	0.000246276	3.60858	0.104993	-0.00102417
1449	rs48679643	3	84.2351	0.923098	0.0779579	1.86974	0.0805302	1.08399	0.0929706	2.39813	0.110278	1.44985	0.108772	0.252886	0.029965	0.000246276	3.60858	0.104993	-0.00102417
1450	rs30556451	3	84.9438	0.923098	0.0779579	1.86974	0.0805302	1.08399	0.0929706	2.39813	0.110278	1.44985	0.108772	0.252886	0.029965	0.000246276	3.60858	0.104993	-0.00102417
1451	rs31381003	3	86.0491	1.51315	0.105411	2.1233	0.0855338	1.25425	0.100385	2.61497	0.113662	2.05225	0.132991	0.489427	0.0494044	6.23391e-06	5.20524	0.209937	-0.00186852
1452	rs3698196	3	86.1279	1.51315	0.105411	2.1233	0.0855338	1.25425	0.100385	2.61497	0.113662	2.05225	0.132991	0.489427	0.0494044	6.23391e-06	5.20524	0.209937	-0.00186852
1453	rs31381084	3	86.3254	1.42718	0.0998563	1.19217	0.0598199	0.719535	0.0686882	1.26408	0.0744056	1.74963	0.118904	0.0835318	0.0110515	0.00316319	2.49988	0.0708322	-0.00069531
1454	rs30303757	3	87.7578	1.42718	0.0998563	1.19217	0.0598199	0.719535	0.0686882	1.26408	0.0744056	1.74963	0.118904	0.0835318	0.0110515	0.00316319	2.49988	0.0708322	-0.00069531
1455	rs30314408	3	87.8549	0.858215	0.0725417	1.00072	0.0539245	0.580329	0.0596233	1.10417	0.069049	1.21293	0.0953926	0.0654425	-0.00893406	0.0352828	1.45244	0.0124899	0.000131237
1456	rs30260103	3	87.9117	0.858215	0.0725417	1.00072	0.0539245	0.580329	0.0596233	1.10417	0.069049	1.21293	0.0953926	0.0654425	-0.00893406	0.0352828	1.45244	0.0124899	0.000131237
1457	rs31136806	3	89.0616	0.858215	0.0725417	1.00072	0.0539245	0.580329	0.0596233	1.10417	0.069049	1.21293	0.0953926	0.0654425	-0.00893406	0.0352828	1.45244	0.0124899	0.000131237
1458	rs32936856	3	89.3611	0.858215	0.0725417	1.00072	0.0539245	0.580329	0.0596233	1.10417	0.069049	1.21293	0.0953926	0.0654425	-0.00893406	0.0352828	1.45244	0.0124899	0.000131237
1459	rs31051029	3	90.1028	0.858215	0.0725417	1.00072	0.0539245	0.580329	0.0596233	1.10417	0.069049	1.21293	0.0953926	0.0654425	-0.00893406	0.0352828	1.45244	0.0124899	0.000131237
1460	rs222624698	3	90.2477	0.858215	0.0725417	1.00072	0.0539245	0.580329	0.0596233	1.10417	0.069049	1.21293	0.0953926	0.0654425	-0.00893406	0.0352828	1.45244	0.0124899	0.000131237
1461	rs30306135	3	90.4128	0.858215	0.0725417	1.00072	0.0539245	0.580329	0.0596233	1.10417	0.069049	1.21293	0.0953926	0.0654425	-0.00893406	0.0352828	1.45244	0.0124899	0.000131237
1462	rs45891719	3	90.4708	0.858215	0.0725417	1.00072	0.0539245	0.580329	0.0596233	1.10417	0.069049	1.21293	0.0953926	0.0654425	-0.00893406	0.0352828	1.45244	0.0124899	0.000131237
1463	rs30118489	3	90.6606	0.858215	0.0725417	1.00072	0.0539245	0.580329	0.0596233	1.10417	0.069049	1.21293	0.0953926	0.0654425	-0.00893406	0.0352828	1.45244	0.0124899	0.000131237
1464	rs236064187	3	90.7049	0.858215	0.0725417	1.00072	0.0539245	0.580329	0.0596233	1.10417	0.069049	1.21293	0.0953926	0.0654425	-0.00893406	0.0352828	1.45244	0.0124899	0.000131237
1465	rs216324260	3	91.4152	0.858215	0.0725417	1.00072	0.0539245	0.580329	0.0596233	1.10417	0.069049	1.21293	0.0953926	0.0654425	-0.00893406	0.0352828	1.45244	0.0124899	0.000131237
1466	rs6201483	3	92.5752	0.858215	0.0725417	1.00072	0.0539245	0.580329	0.0596233	1.10417	0.069049	1.21293	0.0953926	0.0654425	-0.00893406	0.0352828	1.45244	0.0124899	0.000131237
1467	rs30793411	3	92.6363	0.858215	0.0725417	1.00072	0.0539245	0.580329	0.0596233	1.10417	0.069049	1.21293	0.0953926	0.0654425	-0.00893406	0.0352828	1.45244	0.0124899	0.000131237
1468	rs47354549	3	93.4827	0.858215	0.0725417	1.00072	0.0539245	0.580329	0.0596233	1.10417	0.069049	1.21293	0.0953926	0.0654425	-0.00893406	0.0352828	1.45244	0.0124899	0.000131237
1469	rs13477263	3	93.5872	0.660387	0.0596362	0.892723	0.0495384	0.827797	0.0762053	1.18948	0.072019	1.19268	0.09403	0.079817	-0.0106638	0.0342681	1.46511	0.0555144	-0.000555616
1470	rs13477272	3	95.6841	0.660387	0.0596362	0.892723	0.0495384	0.827797	0.0762053	1.18948	0.072019	1.19268	0.09403	0.079817	-0.0106638	0.0342681	1.46511	0.0555144	-0.000555616
1471	rs13477280	3	98.283	0.702567	0.0588718	0.643523	0.0373672	0.607186	0.0574209	0.733375	0.049039	0.884231	0.0732033	0.200392	0.0228073	0.136293	0.865526	0.157846	0.001394
1472	rs227691182	3	98.7703	0.702567	0.0588718	0.643523	0.0373672	0.607186	0.0574209	0.733375	0.049039	0.884231	0.0732033	0.200392	0.0228073	0.136293	0.865526	0.157846	0.001394
1473	rs13477288	3	99.553	0.702567	0.0588718	0.643523	0.0373672	0.607186	0.0574209	0.733375	0.049039	0.884231	0.0732033	0.200392	0.0228073	0.136293	0.865526	0.157846	0.001394
1474	rs3159432	3	100.388	0.769444	0.0648713	1.32178	0.0618039	1.10292	0.0886865	1.71887	0.0865346	1.09008	0.0864237	0.668699	0.0596571	0.00216952	2.66364	0.0357564	0.0003637
1475	rs3162061	3	100.72	0.769444	0.0648713	1.32178	0.0618039	1.10292	0.0886865	1.71887	0.0865346	1.09008	0.0864237	0.668699	0.0596571	0.00216952	2.66364	0.0357564	0.0003637
1476	D3Mit189	3	100.976	0.192992	0.022671	0.809851	0.0456271	0.790489	0.0718456	1.42494	0.0781909	0.562075	0.0559737	0.538958	0.0515738	0.0691733	1.16006	0.124798	0.00118087
1477	rs30645832	3	101.161	0.192992	0.022671	0.809851	0.0456271	0.790489	0.0718456	1.42494	0.0781909	0.562075	0.0559737	0.538958	0.0515738	0.0691733	1.16006	0.124798	0.00118087
1478	rs6365379	3	101.213	0.192992	0.022671	0.809851	0.0456271	0.790489	0.0718456	1.42494	0.0781909	0.562075	0.0559737	0.538958	0.0515738	0.0691733	1.16006	0.124798	0.00118087
1479	rs13477294	3	101.61	0.192992	0.022671	0.809851	0.0456271	0.790489	0.0718456	1.42494	0.0781909	0.562075	0.0559737	0.538958	0.0515738	0.0691733	1.16006	0.124798	0.00118087
1480	rs31048985	3	101.709	0.192992	0.022671	0.809851	0.0456271	0.790489	0.0718456	1.42494	0.0781909	0.562075	0.0559737	0.538958	0.0515738	0.0691733	1.16006	0.124798	0.00118087
1481	rs30661719	3	102.111	0.192992	0.022671	0.809851	0.0456271	0.790489	0.0718456	1.42494	0.0781909	0.562075	0.0559737	0.538958	0.0515738	0.0691733	1.16006	0.124798	0.00118087
1482	rs30860082	3	105.06	1.04809	0.0854547	0.23394	0.0186022	0.559514	0.0590582	0.636057	0.0483485	0.0153781	0.00232812	0.270067	0.0318853	0.389394	0.40961	0.0129127	0.000138919
1483	rs13477308	3	105.116	1.04809	0.0854547	0.23394	0.0186022	0.559514	0.0590582	0.636057	0.0483485	0.0153781	0.00232812	0.270067	0.0318853	0.389394	0.40961	0.0129127	0.000138919
1484	rs13477309	3	105.47	1.04809	0.0854547	0.23394	0.0186022	0.559514	0.0590582	0.636057	0.0483485	0.0153781	0.00232812	0.270067	0.0318853	0.389394	0.40961	0.0129127	0.000138919
1485	rs30953849	3	105.668	1.04809	0.0854547	0.23394	0.0186022	0.559514	0.0590582	0.636057	0.0483485	0.0153781	0.00232812	0.270067	0.0318853	0.389394	0.40961	0.0129127	0.000138919
1486	rs33666633	3	105.835	1.04809	0.0854547	0.23394	0.0186022	0.559514	0.0590582	0.636057	0.0483485	0.0153781	0.00232812	0.270067	0.0318853	0.389394	0.40961	0.0129127	0.000138919
1487	rs13477315	3	106.965	1.04809	0.0854547	0.23394	0.0186022	0.559514	0.0590582	0.636057	0.0483485	0.0153781	0.00232812	0.270067	0.0318853	0.389394	0.40961	0.0129127	0.000138919
1488	rs3702359	3	107.129	0.808032	0.0696908	0.666784	0.040681	0.919686	0.0804778	1.04697	0.0655316	0.36351	0.0408907	0.706344	0.0637907	0.0537673	1.26948	0.26324	0.00226649
1489	rs6259798	3	107.471	0.808032	0.0696908	0.666784	0.040681	0.919686	0.0804778	1.04697	0.0655316	0.36351	0.0408907	0.706344	0.0637907	0.0537673	1.26948	0.26324	0.00226649
1490	rs13477320	3	109.019	0.808032	0.0696908	0.666784	0.040681	0.919686	0.0804778	1.04697	0.0655316	0.36351	0.0408907	0.706344	0.0637907	0.0537673	1.26948	0.26324	0.00226649
1491	rs13477321	3	109.192	0.808032	0.0696908	0.666784	0.040681	0.919686	0.0804778	1.04697	0.0655316	0.36351	0.0408907	0.706344	0.0637907	0.0537673	1.26948	0.26324	0.00226649
1492	rs13477322	3	109.429	0.804769	0.070266	0.831276	0.0479364	1.0393	0.0880535	1.35637	0.0779221	0.530314	0.0550588	0.943047	0.0784265	0.0132411	1.87808	0.461439	0.00358523
1493	UNCHS009818	3	109.661	0.747253	0.0643778	0.944763	0.050296	1.08576	0.0874148	1.587	0.0826429	0.677179	0.0629336	1.13016	0.0850578	0.0047942	2.31928	0.654563	0.00444646
1494	UNC5945286	3	109.677	0.747253	0.0643778	0.944763	0.050296	1.08576	0.0874148	1.587	0.0826429	0.677179	0.0629336	1.13016	0.0850578	0.0047942	2.31928	0.654563	0.00444646
1495	UNCHS009822	3	109.689	0.747253	0.0643778	0.944763	0.050296	1.08576	0.0874148	1.587	0.0826429	0.677179	0.0629336	1.13016	0.0850578	0.0047942	2.31928	0.654563	0.00444646
1496	UNC5946223	3	109.755	0.747253	0.0643778	0.944763	0.050296	1.08576	0.0874148	1.587	0.0826429	0.677179	0.0629336	1.13016	0.0850578	0.0047942	2.31928	0.654563	0.00444646
1497	rs3656131	3	110.554	0.747253	0.0643778	0.944763	0.050296	1.08576	0.0874148	1.587	0.0826429	0.677179	0.0629336	1.13016	0.0850578	0.0047942	2.31928	0.654563	0.00444646
1498	rs3674856	3	111.218	0.747253	0.0643778	0.944763	0.050296	1.08576	0.0874148	1.587	0.0826429	0.677179	0.0629336	1.13016	0.0850578	0.0047942	2.31928	0.654563	0.00444646
1499	rs30007837	3	111.871	0.747253	0.0643778	0.944763	0.050296	1.08576	0.0874148	1.587	0.0826429	0.677179	0.0629336	1.13016	0.0850578	0.0047942	2.31928	0.654563	0.00444646
1500	rs3698700	3	112.234	0.747253	0.0643778	0.944763	0.050296	1.08576	0.0874148	1.587	0.0826429	0.677179	0.0629336	1.13016	0.0850578	0.0047942	2.31928	0.654563	0.00444646
1501	rs31606992	3	113.03	0.747253	0.0643778	0.944763	0.050296	1.08576	0.0874148	1.587	0.0826429	0.677179	0.0629336	1.13016	0.0850578	0.0047942	2.31928	0.654563	0.00444646
1502	rs31096800	3	113.034	0.713095	0.0621285	0.422396	0.0282965	0.620707	0.0599841	0.690198	0.0484401	0.549126	0.0540615	0.513456	0.0497087	0.184042	0.735083	0.911884	0.00550666
1503	rs51050047	3	113.088	0.586374	0.0546788	0.536875	0.0342097	0.846376	0.0755706	0.925679	0.0600307	0.709981	0.0653977	0.392933	0.0410817	0.103728	0.984103	0.707928	0.00460899
1504	rs31644320	3	114.753	0.586374	0.0546788	0.536875	0.0342097	0.846376	0.0755706	0.925679	0.0600307	0.709981	0.0653977	0.392933	0.0410817	0.103728	0.984103	0.707928	0.00460899
1505	rs6290322	3	115.35	0.586374	0.0546788	0.536875	0.0342097	0.846376	0.0755706	0.925679	0.0600307	0.709981	0.0653977	0.392933	0.0410817	0.103728	0.984103	0.707928	0.00460899
1506	rs47398806	3	115.863	0.586374	0.0546788	0.536875	0.0342097	0.846376	0.0755706	0.925679	0.0600307	0.709981	0.0653977	0.392933	0.0410817	0.103728	0.984103	0.707928	0.00460899
1507	rs222892694	3	116.719	0.586374	0.0546788	0.536875	0.0342097	0.846376	0.0755706	0.925679	0.0600307	0.709981	0.0653977	0.392933	0.0410817	0.103728	0.984103	0.707928	0.00460899
1508	rs46714699	3	116.892	0.586374	0.0546788	0.536875	0.0342097	0.846376	0.0755706	0.925679	0.0600307	0.709981	0.0653977	0.392933	0.0410817	0.103728	0.984103	0.707928	0.00460899
1509	rs30452147	3	117.504	0.586374	0.0546788	0.536875	0.0342097	0.846376	0.0755706	0.925679	0.0600307	0.709981	0.0653977	0.392933	0.0410817	0.103728	0.984103	0.707928	0.00460899
1510	rs31526621	3	116.992	0.0402043	0.00541376	0.261246	0.019491	0.576389	0.0575803	0.347361	0.0292656	0.061673	-0.00858294	0.522677	0.0506515	0.758573	0.120003	1.03266	0.00593829
1511	rs31200554	3	118.516	0.0402043	0.00541376	0.261246	0.019491	0.576389	0.0575803	0.347361	0.0292656	0.061673	-0.00858294	0.522677	0.0506515	0.758573	0.120003	1.03266	0.00593829
1512	rs13477364	3	118.587	0.221558	-0.0264964	0.206655	0.0165399	0.362686	0.0421041	0.376564	0.0323496	0.0163747	0.00245775	0.491779	0.0500728	0.806874	0.0931942	1.1394	0.00642615
1513	rs30810568	3	119.314	0.221558	-0.0264964	0.206655	0.0165399	0.362686	0.0421041	0.376564	0.0323496	0.0163747	0.00245775	0.491779	0.0500728	0.806874	0.0931942	1.1394	0.00642615
1514	rs13477369	3	119.722	0.36444	-0.0407036	0.106915	0.00950727	0.0486186	0.0073576	0.213327	0.0208911	0.187333	-0.0245854	0.416861	0.0453261	0.907835	0.0419932	0.635224	0.0044694
1515	rs31593962	3	120.431	0.36444	-0.0407036	0.106915	0.00950727	0.0486186	0.0073576	0.213327	0.0208911	0.187333	-0.0245854	0.416861	0.0453261	0.907835	0.0419932	0.635224	0.0044694
1516	rs38671447	3	120.902	0.0277597	-0.00402242	0.436942	0.0309389	0.251803	0.0322173	0.533448	0.0432276	0.0119269	0.00184298	0.595743	0.0591239	0.740423	0.13052	0.694686	0.00485265
1517	rs13477376	3	121.798	0.0277597	-0.00402242	0.436942	0.0309389	0.251803	0.0322173	0.533448	0.0432276	0.0119269	0.00184298	0.595743	0.0591239	0.740423	0.13052	0.694686	0.00485265
1518	rs48125590	3	121.853	0.114594	0.0142196	0.551603	0.034495	0.373838	0.0413009	0.995087	0.0623733	0.0583373	0.00810625	0.430604	0.0436402	0.476351	0.322073	0.725382	0.00478397
1519	rs46047885	3	122.54	0.114594	0.0142196	0.551603	0.034495	0.373838	0.0413009	0.995087	0.0623733	0.0583373	0.00810625	0.430604	0.0436402	0.476351	0.322073	0.725382	0.00478397
1520	rs31182788	3	123.318	0.114594	0.0142196	0.551603	0.034495	0.373838	0.0413009	0.995087	0.0623733	0.0583373	0.00810625	0.430604	0.0436402	0.476351	0.322073	0.725382	0.00478397
1521	rs31000962	3	123.374	0.0277597	-0.00402242	0.436942	0.0309389	0.251803	0.0322173	0.533448	0.0432276	0.0119269	0.00184298	0.595743	0.0591239	0.740423	0.13052	0.694686	0.00485265
1522	rs30673791	3	123.392	0.0277597	-0.00402242	0.436942	0.0309389	0.251803	0.0322173	0.533448	0.0432276	0.0119269	0.00184298	0.595743	0.0591239	0.740423	0.13052	0.694686	0.00485265
1523	rs47914673	3	123.395	0.0277597	-0.00402242	0.436942	0.0309389	0.251803	0.0322173	0.533448	0.0432276	0.0119269	0.00184298	0.595743	0.0591239	0.740423	0.13052	0.694686	0.00485265
1524	rs50963474	3	125.608	0.0277597	-0.00402242	0.436942	0.0309389	0.251803	0.0322173	0.533448	0.0432276	0.0119269	0.00184298	0.595743	0.0591239	0.740423	0.13052	0.694686	0.00485265
1525	rs30467523	3	126.083	0.0277597	-0.00402242	0.436942	0.0309389	0.251803	0.0322173	0.533448	0.0432276	0.0119269	0.00184298	0.595743	0.0591239	0.740423	0.13052	0.694686	0.00485265
1526	rs30472785	3	126.116	0.0422826	0.00593946	0.508226	0.0342051	0.320733	0.0386349	0.776451	0.0556978	0.0359626	0.00536316	0.521612	0.0530187	0.602309	0.22018	0.729995	0.00500591
1527	rs30470586	3	126.198	0.114594	0.0142196	0.551603	0.034495	0.373838	0.0413009	0.995087	0.0623733	0.0583373	0.00810625	0.430604	0.0436402	0.476351	0.322073	0.725382	0.00478397
1528	rs3671119	3	126.414	0.0482737	-0.00630104	0.237716	0.0176065	0.028894	0.00410738	0.553935	0.0407099	0.0275868	-0.00392378	0.192452	0.0224096	0.957497	0.0188625	0.429943	0.0032274
1529	rs49131857	3	126.966	0.0482737	-0.00630104	0.237716	0.0176065	0.028894	0.00410738	0.553935	0.0407099	0.0275868	-0.00392378	0.192452	0.0224096	0.957497	0.0188625	0.429943	0.0032274
1530	rs45700995	3	127.273	0.0482737	-0.00630104	0.237716	0.0176065	0.028894	0.00410738	0.553935	0.0407099	0.0275868	-0.00392378	0.192452	0.0224096	0.957497	0.0188625	0.429943	0.0032274
1531	rs3670168	3	128.293	0.198826	-0.0230335	0.725658	0.0413587	0.020503	0.00296559	0.705119	0.0486353	0.194755	0.0239092	0.110091	0.0138511	0.702683	0.15324	0.170902	0.00153996
1532	rs13477397	3	128.637	0.198826	-0.0230335	0.725658	0.0413587	0.020503	0.00296559	0.705119	0.0486353	0.194755	0.0239092	0.110091	0.0138511	0.702683	0.15324	0.170902	0.00153996
1533	rs31738289	3	128.871	0.428624	-0.0455916	0.599168	0.0382991	0.0780348	-0.011303	0.303138	0.0274371	0.143985	0.0194165	0.200232	0.0247159	0.779345	0.10827	0.132075	0.0012829
1534	rs30548532	3	129.038	0.428624	-0.0455916	0.599168	0.0382991	0.0780348	-0.011303	0.303138	0.0274371	0.143985	0.0194165	0.200232	0.0247159	0.779345	0.10827	0.132075	0.0012829
1535	rs30504375	3	129.256	0.428624	-0.0455916	0.599168	0.0382991	0.0780348	-0.011303	0.303138	0.0274371	0.143985	0.0194165	0.200232	0.0247159	0.779345	0.10827	0.132075	0.0012829
1536	rs37569935	3	129.292	0.262835	-0.0318097	0.711716	0.0444967	0.038707	-0.00601929	0.371355	0.0332366	0.279877	0.0348185	0.320206	0.0373817	0.69094	0.160559	0.0820477	0.000845704
1537	rs31332466	3	129.483	0.327104	-0.0350185	0.524741	0.0331638	0.12965	-0.0170507	0.17009	0.0161244	0.141422	0.018149	0.0637262	0.00842653	0.903068	0.0442794	0.145551	-0.00133494
1538	rs30601881	3	129.497	0.36885	0.0393009	0.841718	0.0484242	0.568057	0.0586434	0.986155	0.0643905	0.160125	0.0207609	0.0542302	0.00747048	0.318983	0.496233	0.23323	0.00204448
1539	rs30607904	3	129.506	0.332955	0.036614	0.578709	0.0373548	0.432262	0.0483141	0.795404	0.0561749	0.000723137	-0.000108965	0.0147218	-0.00212917	0.622707	0.205716	0.0733977	0.00072826
1540	rs30507350	3	129.51	0.0268817	-0.00409304	0.135969	0.0123863	0.119254	-0.0176979	0.069836	0.00810554	0.204441	-0.0274041	0.243965	-0.0311561	0.988463	0.00503954	0.315244	-0.00278085
1541	rs30261132	3	129.643	0.0268817	-0.00409304	0.135969	0.0123863	0.119254	-0.0176979	0.069836	0.00810554	0.204441	-0.0274041	0.243965	-0.0311561	0.988463	0.00503954	0.315244	-0.00278085
1542	UNC030323436	3	129.645	0.00701638	0.00112118	0.0171453	0.00179183	0.239651	-0.0333448	0.0395829	-0.00486947	0.257437	-0.0338359	0.249638	-0.0325742	0.987796	0.00533266	0.262338	-0.0024193
1543	rs4221957	3	129.825	0.0428381	0.00660945	0.0977831	-0.00945206	0.377914	-0.048412	0.167954	-0.0184794	0.308892	-0.0392663	0.248589	-0.0325604	0.929136	0.0319207	0.208017	-0.00198557
1544	rs51819976	3	130.162	0.0428381	0.00660945	0.0977831	-0.00945206	0.377914	-0.048412	0.167954	-0.0184794	0.308892	-0.0392663	0.248589	-0.0325604	0.929136	0.0319207	0.208017	-0.00198557
1545	rs258043401	3	130.198	0.0428381	0.00660945	0.0977831	-0.00945206	0.377914	-0.048412	0.167954	-0.0184794	0.308892	-0.0392663	0.248589	-0.0325604	0.929136	0.0319207	0.208017	-0.00198557
1546	rs30746899	3	130.315	0.0428381	0.00660945	0.0977831	-0.00945206	0.377914	-0.048412	0.167954	-0.0184794	0.308892	-0.0392663	0.248589	-0.0325604	0.929136	0.0319207	0.208017	-0.00198557
1547	rs36492184	3	130.359	0.0428381	0.00660945	0.0977831	-0.00945206	0.377914	-0.048412	0.167954	-0.0184794	0.308892	-0.0392663	0.248589	-0.0325604	0.929136	0.0319207	0.208017	-0.00198557
1548	rs31146935	3	130.997	0.0428381	0.00660945	0.0977831	-0.00945206	0.377914	-0.048412	0.167954	-0.0184794	0.308892	-0.0392663	0.248589	-0.0325604	0.929136	0.0319207	0.208017	-0.00198557
1549	rs31152902	3	131.032	0.0428381	0.00660945	0.0977831	-0.00945206	0.377914	-0.048412	0.167954	-0.0184794	0.308892	-0.0392663	0.248589	-0.0325604	0.929136	0.0319207	0.208017	-0.00198557
1550	rs51430784	3	131.351	0.0428381	0.00660945	0.0977831	-0.00945206	0.377914	-0.048412	0.167954	-0.0184794	0.308892	-0.0392663	0.248589	-0.0325604	0.929136	0.0319207	0.208017	-0.00198557
1551	rs30682544	3	132.174	0.0428381	0.00660945	0.0977831	-0.00945206	0.377914	-0.048412	0.167954	-0.0184794	0.308892	-0.0392663	0.248589	-0.0325604	0.929136	0.0319207	0.208017	-0.00198557
1552	rs30689880	3	132.233	0.0428381	0.00660945	0.0977831	-0.00945206	0.377914	-0.048412	0.167954	-0.0184794	0.308892	-0.0392663	0.248589	-0.0325604	0.929136	0.0319207	0.208017	-0.00198557
1553	rs30162637	3	132.631	0.0428381	0.00660945	0.0977831	-0.00945206	0.377914	-0.048412	0.167954	-0.0184794	0.308892	-0.0392663	0.248589	-0.0325604	0.929136	0.0319207	0.208017	-0.00198557
1554	rs13477412	3	132.688	0.0428381	0.00660945	0.0977831	-0.00945206	0.377914	-0.048412	0.167954	-0.0184794	0.308892	-0.0392663	0.248589	-0.0325604	0.929136	0.0319207	0.208017	-0.00198557
1555	rs13477421	3	134.242	0.0428381	0.00660945	0.0977831	-0.00945206	0.377914	-0.048412	0.167954	-0.0184794	0.308892	-0.0392663	0.248589	-0.0325604	0.929136	0.0319207	0.208017	-0.00198557
1556	rs52251859	3	134.367	0.0566088	-0.00833288	0.154748	-0.0138114	0.545917	-0.0615677	0.261912	-0.0259239	0.250642	-0.0323582	0.39139	-0.0453059	0.811835	0.0905324	0.455792	-0.00368506
1557	rs46667062	3	134.523	0.0566088	-0.00833288	0.154748	-0.0138114	0.545917	-0.0615677	0.261912	-0.0259239	0.250642	-0.0323582	0.39139	-0.0453059	0.811835	0.0905324	0.455792	-0.00368506
1558	rs37495061	3	135.171	0.0566088	-0.00833288	0.154748	-0.0138114	0.545917	-0.0615677	0.261912	-0.0259239	0.250642	-0.0323582	0.39139	-0.0453059	0.811835	0.0905324	0.455792	-0.00368506
1559	rs30026548	3	135.444	0.0566088	-0.00833288	0.154748	-0.0138114	0.545917	-0.0615677	0.261912	-0.0259239	0.250642	-0.0323582	0.39139	-0.0453059	0.811835	0.0905324	0.455792	-0.00368506
1560	rs30854594	3	135.471	0.0566088	-0.00833288	0.154748	-0.0138114	0.545917	-0.0615677	0.261912	-0.0259239	0.250642	-0.0323582	0.39139	-0.0453059	0.811835	0.0905324	0.455792	-0.00368506
1561	rs30657646	3	135.953	0.0566088	-0.00833288	0.154748	-0.0138114	0.545917	-0.0615677	0.261912	-0.0259239	0.250642	-0.0323582	0.39139	-0.0453059	0.811835	0.0905324	0.455792	-0.00368506
1562	rs30788144	3	136.706	0.0566088	-0.00833288	0.154748	-0.0138114	0.545917	-0.0615677	0.261912	-0.0259239	0.250642	-0.0323582	0.39139	-0.0453059	0.811835	0.0905324	0.455792	-0.00368506
1563	rs30809559	3	136.709	0.0566088	-0.00833288	0.154748	-0.0138114	0.545917	-0.0615677	0.261912	-0.0259239	0.250642	-0.0323582	0.39139	-0.0453059	0.811835	0.0905324	0.455792	-0.00368506
1564	rs30814711	3	136.919	0.0566088	-0.00833288	0.154748	-0.0138114	0.545917	-0.0615677	0.261912	-0.0259239	0.250642	-0.0323582	0.39139	-0.0453059	0.811835	0.0905324	0.455792	-0.00368506
1565	rs30258925	3	137.126	0.0566088	-0.00833288	0.154748	-0.0138114	0.545917	-0.0615677	0.261912	-0.0259239	0.250642	-0.0323582	0.39139	-0.0453059	0.811835	0.0905324	0.455792	-0.00368506
1566	rs30510683	3	137.158	0.0566088	-0.00833288	0.154748	-0.0138114	0.545917	-0.0615677	0.261912	-0.0259239	0.250642	-0.0323582	0.39139	-0.0453059	0.811835	0.0905324	0.455792	-0.00368506
1567	rs47741729	3	137.196	0.0566088	-0.00833288	0.154748	-0.0138114	0.545917	-0.0615677	0.261912	-0.0259239	0.250642	-0.0323582	0.39139	-0.0453059	0.811835	0.0905324	0.455792	-0.00368506
1568	rs30843655	3	137.337	0.0566088	-0.00833288	0.154748	-0.0138114	0.545917	-0.0615677	0.261912	-0.0259239	0.250642	-0.0323582	0.39139	-0.0453059	0.811835	0.0905324	0.455792	-0.00368506
1569	rs30847085	3	137.344	0.0566088	-0.00833288	0.154748	-0.0138114	0.545917	-0.0615677	0.261912	-0.0259239	0.250642	-0.0323582	0.39139	-0.0453059	0.811835	0.0905324	0.455792	-0.00368506
1570	rs30903682	3	138.245	0.0566088	-0.00833288	0.154748	-0.0138114	0.545917	-0.0615677	0.261912	-0.0259239	0.250642	-0.0323582	0.39139	-0.0453059	0.811835	0.0905324	0.455792	-0.00368506
1571	rs50141751	3	138.273	0.121446	-0.0174062	0.378857	-0.0299408	0.791579	-0.082621	0.56404	-0.0485215	0.237466	-0.0320056	0.162397	-0.0227369	0.581938	0.235124	0.0763601	-0.000834399
1572	rs259509710	3	138.497	0.121446	-0.0174062	0.378857	-0.0299408	0.791579	-0.082621	0.56404	-0.0485215	0.237466	-0.0320056	0.162397	-0.0227369	0.581938	0.235124	0.0763601	-0.000834399
1573	rs30005275	3	138.557	0.121446	-0.0174062	0.378857	-0.0299408	0.791579	-0.082621	0.56404	-0.0485215	0.237466	-0.0320056	0.162397	-0.0227369	0.581938	0.235124	0.0763601	-0.000834399
1574	rs47138345	3	138.766	0.121446	-0.0174062	0.378857	-0.0299408	0.791579	-0.082621	0.56404	-0.0485215	0.237466	-0.0320056	0.162397	-0.0227369	0.581938	0.235124	0.0763601	-0.000834399
1575	rs30597855	3	138.815	0.2394	-0.0301707	0.510966	-0.0362676	1.44314	-0.117123	0.788118	-0.0593301	0.54254	-0.0587359	0.225108	-0.0289462	0.13986	0.854306	0.363355	-0.00309288
1576	rs30602660	3	138.817	0.165076	-0.0215871	0.0996262	-0.0091429	0.928297	-0.0867322	0.409465	-0.036091	0.0740949	-0.0109458	0.0436178	-0.00644038	0.791218	0.101704	0.014412	-0.000162483
1577	rs30960444	3	138.906	0.165076	-0.0215871	0.0996262	-0.0091429	0.928297	-0.0867322	0.409465	-0.036091	0.0740949	-0.0109458	0.0436178	-0.00644038	0.791218	0.101704	0.014412	-0.000162483
1578	rs30404279	3	139.121	0.165076	-0.0215871	0.0996262	-0.0091429	0.928297	-0.0867322	0.409465	-0.036091	0.0740949	-0.0109458	0.0436178	-0.00644038	0.791218	0.101704	0.014412	-0.000162483
1579	rs46843827	3	139.354	0.242971	-0.0303643	0.22082	-0.018565	0.871036	-0.0838119	0.568221	-0.046455	0.177152	-0.0241057	0.193322	-0.0253367	0.574804	0.240481	0.0209558	-0.000236164
1580	rs3720498	3	139.469	0.284501	-0.0337808	0.0849898	-0.0078247	0.655663	-0.0669331	0.366081	-0.0324764	0.132047	-0.018353	0.190169	-0.0244345	0.79361	0.100393	0.0596311	-0.000639201
1581	rs31051968	3	140.134	0.284501	-0.0337808	0.0849898	-0.0078247	0.655663	-0.0669331	0.366081	-0.0324764	0.132047	-0.018353	0.190169	-0.0244345	0.79361	0.100393	0.0596311	-0.000639201
1582	rs30608223	3	140.288	0.284501	-0.0337808	0.0849898	-0.0078247	0.655663	-0.0669331	0.366081	-0.0324764	0.132047	-0.018353	0.190169	-0.0244345	0.79361	0.100393	0.0596311	-0.000639201
1583	rs47788372	3	140.374	0.284501	-0.0337808	0.0849898	-0.0078247	0.655663	-0.0669331	0.366081	-0.0324764	0.132047	-0.018353	0.190169	-0.0244345	0.79361	0.100393	0.0596311	-0.000639201
1584	rs45817151	3	140.679	0.284501	-0.0337808	0.0849898	-0.0078247	0.655663	-0.0669331	0.366081	-0.0324764	0.132047	-0.018353	0.190169	-0.0244345	0.79361	0.100393	0.0596311	-0.000639201
1585	rs47954984	3	141.521	0.284501	-0.0337808	0.0849898	-0.0078247	0.655663	-0.0669331	0.366081	-0.0324764	0.132047	-0.018353	0.190169	-0.0244345	0.79361	0.100393	0.0596311	-0.000639201
1586	rs30081444	3	141.71	0.284501	-0.0337808	0.0849898	-0.0078247	0.655663	-0.0669331	0.366081	-0.0324764	0.132047	-0.018353	0.190169	-0.0244345	0.79361	0.100393	0.0596311	-0.000639201
1587	rs48117257	3	141.724	0.238771	-0.0290195	0.160083	-0.0137101	0.739363	-0.0723946	0.424183	-0.0361781	0.165724	-0.0222641	0.0203086	-0.00302069	0.781067	0.107312	0.0549574	-0.000588111
1588	rs31085126	3	141.734	0.375291	-0.0407526	0.143443	0.0121066	0.228121	-0.0289496	0.263089	-0.024307	0.174457	0.0226998	0.423879	0.0449152	0.829631	0.0811149	0.177294	0.00160189
1589	rs3702895	3	141.828	0.486437	-0.0519656	0.144467	-0.0127344	0.512844	-0.0573582	0.591006	-0.0475362	0.159141	-0.0216585	0.217372	0.0275026	0.640269	0.193637	0.114739	-0.00112736
1590	rs46603866	3	141.943	0.486437	-0.0519656	0.144467	-0.0127344	0.512844	-0.0573582	0.591006	-0.0475362	0.159141	-0.0216585	0.217372	0.0275026	0.640269	0.193637	0.114739	-0.00112736
1591	rs3090379	3	142.042	0.51223	-0.0563946	0.00410172	-0.000430574	0.341931	-0.0442011	0.500136	-0.0440325	0.253113	-0.0330847	0.402862	0.0471319	0.679147	0.168036	0.0141507	0.000156183
1592	rs48312469	3	142.113	0.51223	-0.0563946	0.00410172	-0.000430574	0.341931	-0.0442011	0.500136	-0.0440325	0.253113	-0.0330847	0.402862	0.0471319	0.679147	0.168036	0.0141507	0.000156183
1593	rs31070753	3	142.631	0.51223	-0.0563946	0.00410172	-0.000430574	0.341931	-0.0442011	0.500136	-0.0440325	0.253113	-0.0330847	0.402862	0.0471319	0.679147	0.168036	0.0141507	0.000156183
1594	rs6290401	3	142.635	0.51223	-0.0563946	0.00410172	-0.000430574	0.341931	-0.0442011	0.500136	-0.0440325	0.253113	-0.0330847	0.402862	0.0471319	0.679147	0.168036	0.0141507	0.000156183
1595	rs30846662	3	143.499	0.51223	-0.0563946	0.00410172	-0.000430574	0.341931	-0.0442011	0.500136	-0.0440325	0.253113	-0.0330847	0.402862	0.0471319	0.679147	0.168036	0.0141507	0.000156183
1596	rs31087332	3	143.528	0.51223	-0.0563946	0.00410172	-0.000430574	0.341931	-0.0442011	0.500136	-0.0440325	0.253113	-0.0330847	0.402862	0.0471319	0.679147	0.168036	0.0141507	0.000156183
1597	rs31250301	3	143.559	0.51223	-0.0563946	0.00410172	-0.000430574	0.341931	-0.0442011	0.500136	-0.0440325	0.253113	-0.0330847	0.402862	0.0471319	0.679147	0.168036	0.0141507	0.000156183
1598	rs36658276	3	143.602	0.361277	-0.04376	0.373033	-0.029416	0.723278	-0.0774053	0.975925	-0.0707575	0.83562	-0.0814141	0.0372168	0.00585166	0.229293	0.639609	0.245222	-0.00231053
1599	rs6391253	3	143.742	0.361277	-0.04376	0.373033	-0.029416	0.723278	-0.0774053	0.975925	-0.0707575	0.83562	-0.0814141	0.0372168	0.00585166	0.229293	0.639609	0.245222	-0.00231053
1600	rs37235391	3	144.209	0.361277	-0.04376	0.373033	-0.029416	0.723278	-0.0774053	0.975925	-0.0707575	0.83562	-0.0814141	0.0372168	0.00585166	0.229293	0.639609	0.245222	-0.00231053
1601	rs30943650	3	144.257	0.361277	-0.04376	0.373033	-0.029416	0.723278	-0.0774053	0.975925	-0.0707575	0.83562	-0.0814141	0.0372168	0.00585166	0.229293	0.639609	0.245222	-0.00231053
1602	rs31122828	3	144.459	0.361277	-0.04376	0.373033	-0.029416	0.723278	-0.0774053	0.975925	-0.0707575	0.83562	-0.0814141	0.0372168	0.00585166	0.229293	0.639609	0.245222	-0.00231053
1603	rs30155079	3	144.666	0.104741	-0.0158201	0.258633	-0.0227775	0.489343	-0.060477	0.857351	-0.0671497	0.529415	-0.0613128	0.0231647	-0.00383336	0.579176	0.237189	0.667903	-0.00520187
1604	rs30656416	3	144.672	0.100583	0.0148436	0.0612667	-0.00620884	0.176846	-0.0261037	0.603394	-0.0513051	0.29972	-0.0388145	0.0262544	-0.00422939	0.923948	0.0343523	1.03279	-0.00689278
1605	rs8243522	3	145.005	0.100583	0.0148436	0.0612667	-0.00620884	0.176846	-0.0261037	0.603394	-0.0513051	0.29972	-0.0388145	0.0262544	-0.00422939	0.923948	0.0343523	1.03279	-0.00689278
1606	rs30359515	3	145.237	0.100583	0.0148436	0.0612667	-0.00620884	0.176846	-0.0261037	0.603394	-0.0513051	0.29972	-0.0388145	0.0262544	-0.00422939	0.923948	0.0343523	1.03279	-0.00689278
1607	rs31670345	3	145.238	0.0803387	0.0121479	0.0716532	-0.00721897	0.223998	-0.0320712	0.610231	-0.0519512	0.395934	-0.0482494	0.0328008	-0.00527523	0.887867	0.0516519	1.18175	-0.00752789
1608	rs30423422	3	145.635	0.0803387	0.0121479	0.0716532	-0.00721897	0.223998	-0.0320712	0.610231	-0.0519512	0.395934	-0.0482494	0.0328008	-0.00527523	0.887867	0.0516519	1.18175	-0.00752789
1609	rs30061551	3	145.801	0.0803387	0.0121479	0.0716532	-0.00721897	0.223998	-0.0320712	0.610231	-0.0519512	0.395934	-0.0482494	0.0328008	-0.00527523	0.887867	0.0516519	1.18175	-0.00752789
1610	rs30012365	3	145.865	0.0803387	0.0121479	0.0716532	-0.00721897	0.223998	-0.0320712	0.610231	-0.0519512	0.395934	-0.0482494	0.0328008	-0.00527523	0.887867	0.0516519	1.18175	-0.00752789
1611	rs3724964	3	145.989	0.0803387	0.0121479	0.0716532	-0.00721897	0.223998	-0.0320712	0.610231	-0.0519512	0.395934	-0.0482494	0.0328008	-0.00527523	0.887867	0.0516519	1.18175	-0.00752789
1612	rs31210291	3	146.613	0.207441	0.028455	0.0211383	0.0022736	0.0829092	0.0135608	0.377683	-0.0366605	0.111151	-0.0169772	0.0216402	0.00356403	0.987007	0.00567994	0.677016	-0.00526703
1613	rs30150956	3	146.631	0.207441	0.028455	0.0211383	0.0022736	0.0829092	0.0135608	0.377683	-0.0366605	0.111151	-0.0169772	0.0216402	0.00356403	0.987007	0.00567994	0.677016	-0.00526703
1614	rs47869953	3	147.103	0.207441	0.028455	0.0211383	0.0022736	0.0829092	0.0135608	0.377683	-0.0366605	0.111151	-0.0169772	0.0216402	0.00356403	0.987007	0.00567994	0.677016	-0.00526703
1615	rs30466239	3	147.331	0.207441	0.028455	0.0211383	0.0022736	0.0829092	0.0135608	0.377683	-0.0366605	0.111151	-0.0169772	0.0216402	0.00356403	0.987007	0.00567994	0.677016	-0.00526703
1616	rs31274470	3	148.065	0.207441	0.028455	0.0211383	0.0022736	0.0829092	0.0135608	0.377683	-0.0366605	0.111151	-0.0169772	0.0216402	0.00356403	0.987007	0.00567994	0.677016	-0.00526703
1617	rs30208755	3	148.107	0.207441	0.028455	0.0211383	0.0022736	0.0829092	0.0135608	0.377683	-0.0366605	0.111151	-0.0169772	0.0216402	0.00356403	0.987007	0.00567994	0.677016	-0.00526703
1618	rs52152284	3	148.809	0.26652	0.035848	0.099825	-0.0101299	0.0115837	-0.002089	0.604548	-0.0535171	0.157979	-0.023543	0.0236887	0.0039779	0.944819	0.0246514	0.603538	-0.00488753
1619	rs31381317	3	149.182	0.26652	0.035848	0.099825	-0.0101299	0.0115837	-0.002089	0.604548	-0.0535171	0.157979	-0.023543	0.0236887	0.0039779	0.944819	0.0246514	0.603538	-0.00488753
1620	rs37662545	3	149.329	0.26652	0.035848	0.099825	-0.0101299	0.0115837	-0.002089	0.604548	-0.0535171	0.157979	-0.023543	0.0236887	0.0039779	0.944819	0.0246514	0.603538	-0.00488753
1621	rs47031923	3	149.648	0.322108	0.041641	0.249828	-0.0224364	0.112733	-0.0183431	0.854067	-0.0681611	0.204731	-0.0292878	0.0251613	0.00420271	0.773713	0.11142	0.521624	-0.00435747
1622	rs30412370	3	150.011	0.322108	0.041641	0.249828	-0.0224364	0.112733	-0.0183431	0.854067	-0.0681611	0.204731	-0.0292878	0.0251613	0.00420271	0.773713	0.11142	0.521624	-0.00435747
1623	rs30532201	3	150.36	0.322108	0.041641	0.249828	-0.0224364	0.112733	-0.0183431	0.854067	-0.0681611	0.204731	-0.0292878	0.0251613	0.00420271	0.773713	0.11142	0.521624	-0.00435747
1624	UNC030281570	3	150.435	0.322108	0.041641	0.249828	-0.0224364	0.112733	-0.0183431	0.854067	-0.0681611	0.204731	-0.0292878	0.0251613	0.00420271	0.773713	0.11142	0.521624	-0.00435747
1625	rs30302454	3	150.558	0.322108	0.041641	0.249828	-0.0224364	0.112733	-0.0183431	0.854067	-0.0681611	0.204731	-0.0292878	0.0251613	0.00420271	0.773713	0.11142	0.521624	-0.00435747
1626	rs30523229	3	150.599	0.322108	0.041641	0.249828	-0.0224364	0.112733	-0.0183431	0.854067	-0.0681611	0.204731	-0.0292878	0.0251613	0.00420271	0.773713	0.11142	0.521624	-0.00435747
1627	rs30511714	3	150.64	0.322108	0.041641	0.249828	-0.0224364	0.112733	-0.0183431	0.854067	-0.0681611	0.204731	-0.0292878	0.0251613	0.00420271	0.773713	0.11142	0.521624	-0.00435747
1628	rs265383006	3	150.86	0.26652	0.035848	0.099825	-0.0101299	0.0115837	-0.002089	0.604548	-0.0535171	0.157979	-0.023543	0.0236887	0.0039779	0.944819	0.0246514	0.603538	-0.00488753
1629	rs49002240	3	151.34	0.207441	0.028455	0.0211383	0.0022736	0.0829092	0.0135608	0.377683	-0.0366605	0.111151	-0.0169772	0.0216402	0.00356403	0.987007	0.00567994	0.677016	-0.00526703
1630	rs30549422	3	151.383	0.294146	-0.0378162	0.255266	-0.0220543	0.317307	-0.0425046	0.68949	-0.0563924	0.434548	-0.0519605	0.14221	-0.0206402	0.631514	0.199617	0.12621	-0.00133071
1631	rs30550199	3	151.407	0.294146	-0.0378162	0.255266	-0.0220543	0.317307	-0.0425046	0.68949	-0.0563924	0.434548	-0.0519605	0.14221	-0.0206402	0.631514	0.199617	0.12621	-0.00133071
1632	rs30544556	3	151.493	0.294146	-0.0378162	0.255266	-0.0220543	0.317307	-0.0425046	0.68949	-0.0563924	0.434548	-0.0519605	0.14221	-0.0206402	0.631514	0.199617	0.12621	-0.00133071
1633	rs13477494	3	151.564	0.294146	-0.0378162	0.255266	-0.0220543	0.317307	-0.0425046	0.68949	-0.0563924	0.434548	-0.0519605	0.14221	-0.0206402	0.631514	0.199617	0.12621	-0.00133071
1634	rs3716135	3	154.323	0.244885	-0.0310802	0.00399936	0.000416185	0.0526313	-0.00835912	0.300815	-0.0290993	0.00311833	-0.000507072	0.316217	-0.038767	0.978611	0.00938997	0.862254	-0.00600391
1635	rs13477504	3	154.325	0.244885	-0.0310802	0.00399936	0.000416185	0.0526313	-0.00835912	0.300815	-0.0290993	0.00311833	-0.000507072	0.316217	-0.038767	0.978611	0.00938997	0.862254	-0.00600391
1636	rs3656494	3	154.777	0.102823	0.0150521	0.0936331	0.00922422	0.216664	0.0311459	0.201812	-0.0217082	0.0135287	-0.00224521	0.0637569	-0.00986387	0.994067	0.00258443	0.884229	-0.00626618
1637	rs13477507	3	154.969	0.102823	0.0150521	0.0936331	0.00922422	0.216664	0.0311459	0.201812	-0.0217082	0.0135287	-0.00224521	0.0637569	-0.00986387	0.994067	0.00258443	0.884229	-0.00626618
1638	rs13477508	3	155.542	0.492396	0.0568919	0.0832097	-0.0084428	0.165566	0.0254911	0.201084	-0.0221915	0.252718	-0.0345518	0.287836	0.038215	0.86873	0.0611152	0.377384	-0.00338081
1639	rs30759800	3	155.679	0.492396	0.0568919	0.0832097	-0.0084428	0.165566	0.0254911	0.201084	-0.0221915	0.252718	-0.0345518	0.287836	0.038215	0.86873	0.0611152	0.377384	-0.00338081
1640	rs3695386	3	155.783	0.531908	0.060724	0.0732808	-0.00756216	0.211485	0.0316652	0.202927	-0.0225561	0.171886	-0.025218	0.300443	0.0398211	0.866045	0.0624593	0.28753	-0.00274211
1641	rs30703217	3	156.034	0.531908	0.060724	0.0732808	-0.00756216	0.211485	0.0316652	0.202927	-0.0225561	0.171886	-0.025218	0.300443	0.0398211	0.866045	0.0624593	0.28753	-0.00274211
1642	rs30801216	3	157.14	0.559161	0.0631464	0.0901625	-0.00918885	0.0752225	0.0126383	0.0662828	-0.00832026	0.212126	-0.0303184	0.15458	0.0228317	0.946014	0.0241025	0.286357	-0.00274638
1643	rs13477514	3	157.33	0.522759	0.0593043	0.19833	-0.0181082	0.0180346	-0.00315397	0.0934348	-0.0112194	0.326214	-0.0423572	0.0652756	0.0102722	0.933267	0.0299941	0.250849	-0.00242372
1644	rs13477515	3	157.52	0.549934	0.0616172	0.136026	-0.0130251	0.028681	0.00494572	0.0154285	-0.00199925	0.243382	-0.033331	0.0628556	-0.00991333	0.965153	0.0154039	0.237953	-0.00232568
1645	rs30916671	3	157.837	0.549934	0.0616172	0.136026	-0.0130251	0.028681	0.00494572	0.0154285	-0.00199925	0.243382	-0.033331	0.0628556	-0.00991333	0.965153	0.0154039	0.237953	-0.00232568
1646	rs31290414	3	158.259	0.549934	0.0616172	0.136026	-0.0130251	0.028681	0.00494572	0.0154285	-0.00199925	0.243382	-0.033331	0.0628556	-0.00991333	0.965153	0.0154039	0.237953	-0.00232568
1647	rs30892471	3	158.396	0.549934	0.0616172	0.136026	-0.0130251	0.028681	0.00494572	0.0154285	-0.00199925	0.243382	-0.033331	0.0628556	-0.00991333	0.965153	0.0154039	0.237953	-0.00232568
1648	rs30353501	3	159.474	0.549934	0.0616172	0.136026	-0.0130251	0.028681	0.00494572	0.0154285	-0.00199925	0.243382	-0.033331	0.0628556	-0.00991333	0.965153	0.0154039	0.237953	-0.00232568
1649	rs13477528	3	159.812	0.549934	0.0616172	0.136026	-0.0130251	0.028681	0.00494572	0.0154285	-0.00199925	0.243382	-0.033331	0.0628556	-0.00991333	0.965153	0.0154039	0.237953	-0.00232568
1650	rs36403089	3	159.856	0.549934	0.0616172	0.136026	-0.0130251	0.028681	0.00494572	0.0154285	-0.00199925	0.243382	-0.033331	0.0628556	-0.00991333	0.965153	0.0154039	0.237953	-0.00232568
1651	rs27666058	4	3.39002	0.476494	-0.0478174	0.0554443	-0.00502031	0.216196	-0.0275129	0.418211	0.0345322	0.0795555	-0.0111563	0.521693	-0.0522721	0.774091	0.111208	2.2754	-0.00987934
1652	rs27697666	4	3.56991	0.333135	-0.0361597	0.0194866	0.00182571	0.0550652	0.00803709	0.635337	0.0469653	0.108722	0.014832	0.431697	-0.0452311	0.837728	0.0768971	1.43786	-0.00763571
1653	rs32600963	4	4.03603	0.423521	-0.0432753	0.115518	-0.0097808	0.037081	-0.00548076	0.358524	0.0304544	0.118929	0.0159412	0.193565	-0.0235452	0.928466	0.0322341	0.671815	-0.0046262
1654	rs13477538	4	5.43587	0.423521	-0.0432753	0.115518	-0.0097808	0.037081	-0.00548076	0.358524	0.0304544	0.118929	0.0159412	0.193565	-0.0235452	0.928466	0.0322341	0.671815	-0.0046262
1655	rs32074103	4	5.59907	0.389471	-0.039656	0.117196	-0.00970322	0.119444	-0.0159238	0.556038	0.0415178	0.0951302	0.0127953	0.292913	-0.0324874	0.841978	0.0746994	0.669163	-0.00452557
1656	rs27662557	4	5.67925	0.389471	-0.039656	0.117196	-0.00970322	0.119444	-0.0159238	0.556038	0.0415178	0.0951302	0.0127953	0.292913	-0.0324874	0.841978	0.0746994	0.669163	-0.00452557
1657	rs32414082	4	5.95812	0.389471	-0.039656	0.117196	-0.00970322	0.119444	-0.0159238	0.556038	0.0415178	0.0951302	0.0127953	0.292913	-0.0324874	0.841978	0.0746994	0.669163	-0.00452557
1658	rs32143059	4	6.3747	0.389471	-0.039656	0.117196	-0.00970322	0.119444	-0.0159238	0.556038	0.0415178	0.0951302	0.0127953	0.292913	-0.0324874	0.841978	0.0746994	0.669163	-0.00452557
1659	rs27674739	4	6.88994	0.439164	-0.042607	0.12545	-0.0101174	0.161746	-0.0202897	0.545956	0.0400795	0.0351616	0.00494546	0.300716	-0.0324791	0.829659	0.0811003	0.773869	-0.00498434
1660	rs3674982	4	6.89356	0.439164	-0.042607	0.12545	-0.0101174	0.161746	-0.0202897	0.545956	0.0400795	0.0351616	0.00494546	0.300716	-0.0324791	0.829659	0.0811003	0.773869	-0.00498434
1661	rs47368500	4	6.91034	0.439164	-0.042607	0.12545	-0.0101174	0.161746	-0.0202897	0.545956	0.0400795	0.0351616	0.00494546	0.300716	-0.0324791	0.829659	0.0811003	0.773869	-0.00498434
1662	UNC040003533	4	7.72341	0.439164	-0.042607	0.12545	-0.0101174	0.161746	-0.0202897	0.545956	0.0400795	0.0351616	0.00494546	0.300716	-0.0324791	0.829659	0.0811003	0.773869	-0.00498434
1663	rs32484153	4	8.23777	0.439164	-0.042607	0.12545	-0.0101174	0.161746	-0.0202897	0.545956	0.0400795	0.0351616	0.00494546	0.300716	-0.0324791	0.829659	0.0811003	0.773869	-0.00498434
1664	rs27658833	4	8.97239	0.439164	-0.042607	0.12545	-0.0101174	0.161746	-0.0202897	0.545956	0.0400795	0.0351616	0.00494546	0.300716	-0.0324791	0.829659	0.0811003	0.773869	-0.00498434
1665	rs27673532	4	9.13348	0.439164	-0.042607	0.12545	-0.0101174	0.161746	-0.0202897	0.545956	0.0400795	0.0351616	0.00494546	0.300716	-0.0324791	0.829659	0.0811003	0.773869	-0.00498434
1666	rs32658271	4	9.24719	0.439164	-0.042607	0.12545	-0.0101174	0.161746	-0.0202897	0.545956	0.0400795	0.0351616	0.00494546	0.300716	-0.0324791	0.829659	0.0811003	0.773869	-0.00498434
1667	rs27657196	4	9.25714	0.439164	-0.042607	0.12545	-0.0101174	0.161746	-0.0202897	0.545956	0.0400795	0.0351616	0.00494546	0.300716	-0.0324791	0.829659	0.0811003	0.773869	-0.00498434
1668	rs13477552	4	9.27672	0.439164	-0.042607	0.12545	-0.0101174	0.161746	-0.0202897	0.545956	0.0400795	0.0351616	0.00494546	0.300716	-0.0324791	0.829659	0.0811003	0.773869	-0.00498434
1669	rs27674896	4	9.41748	0.439164	-0.042607	0.12545	-0.0101174	0.161746	-0.0202897	0.545956	0.0400795	0.0351616	0.00494546	0.300716	-0.0324791	0.829659	0.0811003	0.773869	-0.00498434
1670	rs32914113	4	9.41898	0.276668	-0.0300262	0.0635881	-0.00549781	0.0427947	-0.0060705	0.753397	0.0511236	0.00155756	-0.000230171	0.183525	-0.0218294	0.911692	0.040152	0.47753	-0.00358967
1671	rs13477553	4	9.46371	0.174105	-0.0206144	0.302413	-0.0219459	0.206447	-0.0257588	0.425674	0.0340835	0.0516013	-0.00729934	0.165548	-0.0202185	0.910672	0.0406382	0.364542	-0.0029243
1672	rs27672423	4	9.55813	0.174105	-0.0206144	0.302413	-0.0219459	0.206447	-0.0257588	0.425674	0.0340835	0.0516013	-0.00729934	0.165548	-0.0202185	0.910672	0.0406382	0.364542	-0.0029243
1673	rs50594232	4	9.65317	0.19546	-0.0226855	0.268751	-0.0199119	0.142639	-0.0186187	0.403837	0.0325382	0.0112859	-0.00167162	0.0538217	-0.00724954	0.959491	0.0179593	0.170946	-0.00158014
1674	rs46165092	4	10.0498	0.19546	-0.0226855	0.268751	-0.0199119	0.142639	-0.0186187	0.403837	0.0325382	0.0112859	-0.00167162	0.0538217	-0.00724954	0.959491	0.0179593	0.170946	-0.00158014
1675	rs32074028	4	10.0598	0.19546	-0.0226855	0.268751	-0.0199119	0.142639	-0.0186187	0.403837	0.0325382	0.0112859	-0.00167162	0.0538217	-0.00724954	0.959491	0.0179593	0.170946	-0.00158014
1676	rs13477555	4	10.215	0.19546	-0.0226855	0.268751	-0.0199119	0.142639	-0.0186187	0.403837	0.0325382	0.0112859	-0.00167162	0.0538217	-0.00724954	0.959491	0.0179593	0.170946	-0.00158014
1677	JAX00545067q	4	10.8194	0.19546	-0.0226855	0.268751	-0.0199119	0.142639	-0.0186187	0.403837	0.0325382	0.0112859	-0.00167162	0.0538217	-0.00724954	0.959491	0.0179593	0.170946	-0.00158014
1678	rs27716383	4	10.8953	0.19546	-0.0226855	0.268751	-0.0199119	0.142639	-0.0186187	0.403837	0.0325382	0.0112859	-0.00167162	0.0538217	-0.00724954	0.959491	0.0179593	0.170946	-0.00158014
1679	rs51322552	4	11.0892	0.19546	-0.0226855	0.268751	-0.0199119	0.142639	-0.0186187	0.403837	0.0325382	0.0112859	-0.00167162	0.0538217	-0.00724954	0.959491	0.0179593	0.170946	-0.00158014
1680	rs27747074	4	11.1715	0.19546	-0.0226855	0.268751	-0.0199119	0.142639	-0.0186187	0.403837	0.0325382	0.0112859	-0.00167162	0.0538217	-0.00724954	0.959491	0.0179593	0.170946	-0.00158014
1681	rs27732409	4	11.5843	0.19546	-0.0226855	0.268751	-0.0199119	0.142639	-0.0186187	0.403837	0.0325382	0.0112859	-0.00167162	0.0538217	-0.00724954	0.959491	0.0179593	0.170946	-0.00158014
1682	rs27746189	4	12.009	0.19546	-0.0226855	0.268751	-0.0199119	0.142639	-0.0186187	0.403837	0.0325382	0.0112859	-0.00167162	0.0538217	-0.00724954	0.959491	0.0179593	0.170946	-0.00158014
1683	rs27710166	4	12.5758	0.19546	-0.0226855	0.268751	-0.0199119	0.142639	-0.0186187	0.403837	0.0325382	0.0112859	-0.00167162	0.0538217	-0.00724954	0.959491	0.0179593	0.170946	-0.00158014
1684	rs31950533	4	13.1266	0.19546	-0.0226855	0.268751	-0.0199119	0.142639	-0.0186187	0.403837	0.0325382	0.0112859	-0.00167162	0.0538217	-0.00724954	0.959491	0.0179593	0.170946	-0.00158014
1685	rs27728896	4	13.3192	0.19546	-0.0226855	0.268751	-0.0199119	0.142639	-0.0186187	0.403837	0.0325382	0.0112859	-0.00167162	0.0538217	-0.00724954	0.959491	0.0179593	0.170946	-0.00158014
1686	rs32895384	4	13.3546	0.19546	-0.0226855	0.268751	-0.0199119	0.142639	-0.0186187	0.403837	0.0325382	0.0112859	-0.00167162	0.0538217	-0.00724954	0.959491	0.0179593	0.170946	-0.00158014
1687	rs31887435	4	13.3657	0.131787	-0.0168116	0.108253	-0.00946779	0.0429841	-0.00642695	0.725998	0.0521067	0.0215268	-0.00327747	0.251948	-0.0299831	0.92074	0.0358629	0.690749	-0.00481371
1688	rs27710326	4	13.3991	0.131787	-0.0168116	0.108253	-0.00946779	0.0429841	-0.00642695	0.725998	0.0521067	0.0215268	-0.00327747	0.251948	-0.0299831	0.92074	0.0358629	0.690749	-0.00481371
1689	rs32451313	4	13.7671	0.0459242	-0.00622244	0.0613871	-0.00551258	0.193163	-0.0247558	0.611066	0.0450015	0.020456	-0.00307748	0.225599	-0.0268148	0.946003	0.0241074	0.535279	-0.00393366
1690	rs27729354	4	13.7758	0.0459242	-0.00622244	0.0613871	-0.00551258	0.193163	-0.0247558	0.611066	0.0450015	0.020456	-0.00307748	0.225599	-0.0268148	0.946003	0.0241074	0.535279	-0.00393366
1691	rs27709882	4	13.828	0.131787	-0.0168116	0.108253	-0.00946779	0.0429841	-0.00642695	0.725998	0.0521067	0.0215268	-0.00327747	0.251948	-0.0299831	0.92074	0.0358629	0.690749	-0.00481371
1692	rs13477568	4	13.8378	0.0459242	-0.00622244	0.0613871	-0.00551258	0.193163	-0.0247558	0.611066	0.0450015	0.020456	-0.00307748	0.225599	-0.0268148	0.946003	0.0241074	0.535279	-0.00393366
1693	rs32937254	4	13.8971	0.131787	-0.0168116	0.108253	-0.00946779	0.0429841	-0.00642695	0.725998	0.0521067	0.0215268	-0.00327747	0.251948	-0.0299831	0.92074	0.0358629	0.690749	-0.00481371
1694	rs32489404	4	16.4309	0.0414364	0.00570427	0.0915298	0.00807448	0.27294	0.0333916	1.21346	0.0731006	0.0679851	0.00983794	0.0603582	-0.00833841	0.781329	0.107166	0.375502	-0.00303525
1695	rs27740623	4	16.4469	0.0414364	0.00570427	0.0915298	0.00807448	0.27294	0.0333916	1.21346	0.0731006	0.0679851	0.00983794	0.0603582	-0.00833841	0.781329	0.107166	0.375502	-0.00303525
1696	rs27740587	4	16.4882	0.0414364	0.00570427	0.0915298	0.00807448	0.27294	0.0333916	1.21346	0.0731006	0.0679851	0.00983794	0.0603582	-0.00833841	0.781329	0.107166	0.375502	-0.00303525
1697	rs13477579	4	16.4923	0.0414364	0.00570427	0.0915298	0.00807448	0.27294	0.0333916	1.21346	0.0731006	0.0679851	0.00983794	0.0603582	-0.00833841	0.781329	0.107166	0.375502	-0.00303525
1698	rs27678919	4	18.4032	0.0414364	0.00570427	0.0915298	0.00807448	0.27294	0.0333916	1.21346	0.0731006	0.0679851	0.00983794	0.0603582	-0.00833841	0.781329	0.107166	0.375502	-0.00303525
1699	rs32878067	4	18.5491	0.0414364	0.00570427	0.0915298	0.00807448	0.27294	0.0333916	1.21346	0.0731006	0.0679851	0.00983794	0.0603582	-0.00833841	0.781329	0.107166	0.375502	-0.00303525
1700	rs27717500	4	18.6187	0.0414364	0.00570427	0.0915298	0.00807448	0.27294	0.0333916	1.21346	0.0731006	0.0679851	0.00983794	0.0603582	-0.00833841	0.781329	0.107166	0.375502	-0.00303525
1701	rs27680867	4	19.1294	0.0414364	0.00570427	0.0915298	0.00807448	0.27294	0.0333916	1.21346	0.0731006	0.0679851	0.00983794	0.0603582	-0.00833841	0.781329	0.107166	0.375502	-0.00303525
1702	rs31904300	4	19.3129	0.0414364	0.00570427	0.0915298	0.00807448	0.27294	0.0333916	1.21346	0.0731006	0.0679851	0.00983794	0.0603582	-0.00833841	0.781329	0.107166	0.375502	-0.00303525
1703	rs48750289	4	19.5744	0.0414364	0.00570427	0.0915298	0.00807448	0.27294	0.0333916	1.21346	0.0731006	0.0679851	0.00983794	0.0603582	-0.00833841	0.781329	0.107166	0.375502	-0.00303525
1704	rs27682826	4	19.5812	0.0416359	0.00576093	0.0497138	0.00458784	0.224437	0.0285308	1.0717	0.067573	0.0189361	0.00289679	0.0577304	0.00804232	0.87414	0.058419	0.39685	-0.00317901
1705	rs32844444	4	19.6143	0.0416359	0.00576093	0.0497138	0.00458784	0.224437	0.0285308	1.0717	0.067573	0.0189361	0.00289679	0.0577304	0.00804232	0.87414	0.058419	0.39685	-0.00317901
1706	rs13477592	4	19.7263	0.0416359	0.00576093	0.0497138	0.00458784	0.224437	0.0285308	1.0717	0.067573	0.0189361	0.00289679	0.0577304	0.00804232	0.87414	0.058419	0.39685	-0.00317901
1707	rs32866890	4	19.9506	0.0416359	0.00576093	0.0497138	0.00458784	0.224437	0.0285308	1.0717	0.067573	0.0189361	0.00289679	0.0577304	0.00804232	0.87414	0.058419	0.39685	-0.00317901
1708	petM-01609-1	4	19.9599	0.0416359	0.00576093	0.0497138	0.00458784	0.224437	0.0285308	1.0717	0.067573	0.0189361	0.00289679	0.0577304	0.00804232	0.87414	0.058419	0.39685	-0.00317901
1709	UNC040021552	4	20.0103	0.0416359	0.00576093	0.0497138	0.00458784	0.224437	0.0285308	1.0717	0.067573	0.0189361	0.00289679	0.0577304	0.00804232	0.87414	0.058419	0.39685	-0.00317901
1710	rs262523552	4	20.1957	0.0416359	0.00576093	0.0497138	0.00458784	0.224437	0.0285308	1.0717	0.067573	0.0189361	0.00289679	0.0577304	0.00804232	0.87414	0.058419	0.39685	-0.00317901
1711	rs31788174	4	20.273	0.0416359	0.00576093	0.0497138	0.00458784	0.224437	0.0285308	1.0717	0.067573	0.0189361	0.00289679	0.0577304	0.00804232	0.87414	0.058419	0.39685	-0.00317901
1712	rs46920250	4	20.4887	0.0416359	0.00576093	0.0497138	0.00458784	0.224437	0.0285308	1.0717	0.067573	0.0189361	0.00289679	0.0577304	0.00804232	0.87414	0.058419	0.39685	-0.00317901
1713	rs13477595	4	20.5191	0.0416359	0.00576093	0.0497138	0.00458784	0.224437	0.0285308	1.0717	0.067573	0.0189361	0.00289679	0.0577304	0.00804232	0.87414	0.058419	0.39685	-0.00317901
1714	rs28314852	4	20.7796	0.0416359	0.00576093	0.0497138	0.00458784	0.224437	0.0285308	1.0717	0.067573	0.0189361	0.00289679	0.0577304	0.00804232	0.87414	0.058419	0.39685	-0.00317901
1715	rs32208316	4	21.6826	0.0416359	0.00576093	0.0497138	0.00458784	0.224437	0.0285308	1.0717	0.067573	0.0189361	0.00289679	0.0577304	0.00804232	0.87414	0.058419	0.39685	-0.00317901
1716	rs50441952	4	21.8559	0.16661	0.0185659	0.0626955	0.00516114	0.171691	0.0204874	0.610807	0.0416344	0.0566922	0.00757049	0.154191	0.0177839	0.933544	0.0298653	0.0813608	-0.000763412
1717	rs32135516	4	22.1849	0.16661	0.0185659	0.0626955	0.00516114	0.171691	0.0204874	0.610807	0.0416344	0.0566922	0.00757049	0.154191	0.0177839	0.933544	0.0298653	0.0813608	-0.000763412
1718	rs13477601	4	22.2363	0.127109	0.0150006	0.127574	-0.0101234	0.112978	0.0145149	0.328293	0.0266971	0.0518157	-0.00711221	0.0270415	0.00359034	0.990031	0.0043513	0.0460187	-0.000460329
1719	rs27733220	4	22.3926	0.127109	0.0150006	0.127574	-0.0101234	0.112978	0.0145149	0.328293	0.0266971	0.0518157	-0.00711221	0.0270415	0.00359034	0.990031	0.0043513	0.0460187	-0.000460329
1720	rs32555118	4	22.5505	0.356717	0.0358417	0.13773	-0.0108963	0.315806	0.0350475	0.327889	0.0268132	0.00595433	-0.000865285	0.00325596	0.000446224	0.947824	0.0232724	0.122678	-0.00115865
1721	rs32486054	4	22.9237	0.356717	0.0358417	0.13773	-0.0108963	0.315806	0.0350475	0.327889	0.0268132	0.00595433	-0.000865285	0.00325596	0.000446224	0.947824	0.0232724	0.122678	-0.00115865
1722	rs27713263	4	22.966	0.356717	0.0358417	0.13773	-0.0108963	0.315806	0.0350475	0.327889	0.0268132	0.00595433	-0.000865285	0.00325596	0.000446224	0.947824	0.0232724	0.122678	-0.00115865
1723	rs32438765	4	23.2955	0.356717	0.0358417	0.13773	-0.0108963	0.315806	0.0350475	0.327889	0.0268132	0.00595433	-0.000865285	0.00325596	0.000446224	0.947824	0.0232724	0.122678	-0.00115865
1724	rs13477622	4	28.3224	0.264669	0.0290817	0.18597	-0.0145357	0.326675	0.037156	0.269883	0.0236142	0.0525326	-0.00741783	0.0593214	-0.0078731	0.945741	0.0242277	0.0238086	-0.000250915
1725	rs27736595	4	29.2604	0.123828	0.0149713	0.241862	-0.0179048	0.263506	0.0308582	0.206734	0.0186896	0.169037	-0.0211746	0.141307	-0.0171589	0.948013	0.0231856	0.0146395	0.00015335
1726	rs3701432	4	29.2632	0.123828	0.0149713	0.241862	-0.0179048	0.263506	0.0308582	0.206734	0.0186896	0.169037	-0.0211746	0.141307	-0.0171589	0.948013	0.0231856	0.0146395	0.00015335
1727	rs50102689	4	29.2741	0.318554	0.0349411	0.176811	-0.0143821	0.445419	0.0490956	0.541031	0.0418232	0.103166	-0.014175	0.222187	-0.0265208	0.759462	0.119494	0.313246	-0.00262008
1728	rs27779705	4	30.762	0.318554	0.0349411	0.176811	-0.0143821	0.445419	0.0490956	0.541031	0.0418232	0.103166	-0.014175	0.222187	-0.0265208	0.759462	0.119494	0.313246	-0.00262008
1729	rs31949226	4	30.8276	0.0144741	0.00203512	0.315124	-0.0231869	0.238556	0.0297302	0.470731	0.037619	0.292697	-0.0347969	0.443252	-0.0456824	0.771436	0.1127	0.435887	-0.00341154
1730	rs32976519	4	31.1183	0.0144741	0.00203512	0.315124	-0.0231869	0.238556	0.0297302	0.470731	0.037619	0.292697	-0.0347969	0.443252	-0.0456824	0.771436	0.1127	0.435887	-0.00341154
1731	rs32917539	4	31.184	0.0144741	0.00203512	0.315124	-0.0231869	0.238556	0.0297302	0.470731	0.037619	0.292697	-0.0347969	0.443252	-0.0456824	0.771436	0.1127	0.435887	-0.00341154
1732	rs47775155	4	31.8628	0.0144741	0.00203512	0.315124	-0.0231869	0.238556	0.0297302	0.470731	0.037619	0.292697	-0.0347969	0.443252	-0.0456824	0.771436	0.1127	0.435887	-0.00341154
1733	rs27730370	4	32.0202	0.0144741	0.00203512	0.315124	-0.0231869	0.238556	0.0297302	0.470731	0.037619	0.292697	-0.0347969	0.443252	-0.0456824	0.771436	0.1127	0.435887	-0.00341154
1734	rs27756664	4	32.0756	0.0144741	0.00203512	0.315124	-0.0231869	0.238556	0.0297302	0.470731	0.037619	0.292697	-0.0347969	0.443252	-0.0456824	0.771436	0.1127	0.435887	-0.00341154
1735	rs13477630	4	32.1005	0.0509538	0.00661657	0.0596844	-0.00516512	0.304085	0.0347229	0.798894	0.0525832	0.129404	-0.0168122	0.231982	-0.0262543	0.840441	0.075493	0.483469	-0.00356635
1736	rs27792767	4	32.2005	0.0509538	0.00661657	0.0596844	-0.00516512	0.304085	0.0347229	0.798894	0.0525832	0.129404	-0.0168122	0.231982	-0.0262543	0.840441	0.075493	0.483469	-0.00356635
1737	rs32711339	4	32.8083	0.0509538	0.00661657	0.0596844	-0.00516512	0.304085	0.0347229	0.798894	0.0525832	0.129404	-0.0168122	0.231982	-0.0262543	0.840441	0.075493	0.483469	-0.00356635
1738	rs27791935	4	32.9332	0.0509538	0.00661657	0.0596844	-0.00516512	0.304085	0.0347229	0.798894	0.0525832	0.129404	-0.0168122	0.231982	-0.0262543	0.840441	0.075493	0.483469	-0.00356635
1739	rs27791934	4	32.9333	0.0509538	0.00661657	0.0596844	-0.00516512	0.304085	0.0347229	0.798894	0.0525832	0.129404	-0.0168122	0.231982	-0.0262543	0.840441	0.075493	0.483469	-0.00356635
1740	rs27774374	4	33.0138	0.0509538	0.00661657	0.0596844	-0.00516512	0.304085	0.0347229	0.798894	0.0525832	0.129404	-0.0168122	0.231982	-0.0262543	0.840441	0.075493	0.483469	-0.00356635
1741	rs27792227	4	33.1814	0.165281	0.0177983	0.235418	-0.0162554	0.238622	0.0260648	0.454137	0.0322299	0.059849	-0.007757	0.520673	-0.0454201	0.807441	0.0928894	0.455672	-0.00325502
1742	rs31834998	4	33.2683	0.165281	0.0177983	0.235418	-0.0162554	0.238622	0.0260648	0.454137	0.0322299	0.059849	-0.007757	0.520673	-0.0454201	0.807441	0.0928894	0.455672	-0.00325502
1743	rs52242743	4	33.2748	0.165281	0.0177983	0.235418	-0.0162554	0.238622	0.0260648	0.454137	0.0322299	0.059849	-0.007757	0.520673	-0.0454201	0.807441	0.0928894	0.455672	-0.00325502
1744	rs27773647	4	33.3168	0.165281	0.0177983	0.235418	-0.0162554	0.238622	0.0260648	0.454137	0.0322299	0.059849	-0.007757	0.520673	-0.0454201	0.807441	0.0928894	0.455672	-0.00325502
1745	rs27806404	4	33.748	0.0535507	0.00645734	0.0108474	0.00092249	0.471855	0.0449122	0.725979	0.0454435	0.200474	0.0233331	0.181316	-0.0200337	0.817693	0.0874095	0.148022	-0.00133958
1746	rs47065993	4	33.9434	0.263284	0.0271848	0.109714	0.00855421	0.737176	0.0633091	1.20601	0.0645133	0.175525	0.0210644	0.0191726	-0.00250645	0.481378	0.317514	0.0249271	0.000250275
1747	rs27790689	4	33.954	0.524736	0.0454078	0.0997174	0.00766817	0.895277	0.0705846	1.00788	0.0562854	0.0541074	0.0070558	0.035621	-0.00444831	0.441408	0.355159	0.00671498	-6.75e-05
1748	rs27772021	4	33.9775	0.524736	0.0454078	0.0997174	0.00766817	0.895277	0.0705846	1.00788	0.0562854	0.0541074	0.0070558	0.035621	-0.00444831	0.441408	0.355159	0.00671498	-6.75e-05
1749	rs32674025	4	33.9951	0.524736	0.0454078	0.0997174	0.00766817	0.895277	0.0705846	1.00788	0.0562854	0.0541074	0.0070558	0.035621	-0.00444831	0.441408	0.355159	0.00671498	-6.75e-05
1750	rs51048948	4	34.0007	0.524736	0.0454078	0.0997174	0.00766817	0.895277	0.0705846	1.00788	0.0562854	0.0541074	0.0070558	0.035621	-0.00444831	0.441408	0.355159	0.00671498	-6.75e-05
1751	UNC040490807	4	34.0494	0.524736	0.0454078	0.0997174	0.00766817	0.895277	0.0705846	1.00788	0.0562854	0.0541074	0.0070558	0.035621	-0.00444831	0.441408	0.355159	0.00671498	-6.75e-05
1752	rs27761020	4	35.0495	0.524736	0.0454078	0.0997174	0.00766817	0.895277	0.0705846	1.00788	0.0562854	0.0541074	0.0070558	0.035621	-0.00444831	0.441408	0.355159	0.00671498	-6.75e-05
1753	rs27797087	4	35.145	0.524736	0.0454078	0.0997174	0.00766817	0.895277	0.0705846	1.00788	0.0562854	0.0541074	0.0070558	0.035621	-0.00444831	0.441408	0.355159	0.00671498	-6.75e-05
1754	rs27757027	4	35.3895	0.524736	0.0454078	0.0997174	0.00766817	0.895277	0.0705846	1.00788	0.0562854	0.0541074	0.0070558	0.035621	-0.00444831	0.441408	0.355159	0.00671498	-6.75e-05
1755	rs27756895	4	35.4413	0.524736	0.0454078	0.0997174	0.00766817	0.895277	0.0705846	1.00788	0.0562854	0.0541074	0.0070558	0.035621	-0.00444831	0.441408	0.355159	0.00671498	-6.75e-05
1756	rs27818568	4	36.4645	0.524736	0.0454078	0.0997174	0.00766817	0.895277	0.0705846	1.00788	0.0562854	0.0541074	0.0070558	0.035621	-0.00444831	0.441408	0.355159	0.00671498	-6.75e-05
1757	rs32786595	4	40.2785	0.440176	0.0395172	0.139425	0.0102975	0.98119	0.0746785	1.2839	0.0654075	0.0161794	0.00218085	0.00509635	-0.000652451	0.354796	0.450022	0.0913156	0.000836021
1758	rs27816773	4	40.7316	0.447241	0.0405026	0.184211	0.0132708	1.07856	0.0809425	1.45617	0.0720608	0.0594148	0.00770473	0.114983	-0.013352	0.221108	0.655396	0.103571	0.000941159
1759	rs6232550	4	41.0256	0.447241	0.0405026	0.184211	0.0132708	1.07856	0.0809425	1.45617	0.0720608	0.0594148	0.00770473	0.114983	-0.013352	0.221108	0.655396	0.103571	0.000941159
1760	rs31921137	4	41.1769	0.545373	0.0471536	0.181939	0.0131857	1.06515	0.0805693	1.05511	0.0590762	0.242818	0.0271961	0.136068	-0.0155734	0.249273	0.603326	0.00569451	5.76e-05
1761	rs28316614	4	41.1918	0.96326	0.070567	0.295332	0.0197952	1.26045	0.0900603	1.2719	0.0667482	0.55704	0.0523091	0.00683175	0.000888531	0.0660589	1.18007	0.070023	-0.000666302
1762	rs28269506	4	41.6553	0.96326	0.070567	0.295332	0.0197952	1.26045	0.0900603	1.2719	0.0667482	0.55704	0.0523091	0.00683175	0.000888531	0.0660589	1.18007	0.070023	-0.000666302
1763	rs27813840	4	41.7061	0.96326	0.070567	0.295332	0.0197952	1.26045	0.0900603	1.2719	0.0667482	0.55704	0.0523091	0.00683175	0.000888531	0.0660589	1.18007	0.070023	-0.000666302
1764	rs46180804	4	41.717	0.96326	0.070567	0.295332	0.0197952	1.26045	0.0900603	1.2719	0.0667482	0.55704	0.0523091	0.00683175	0.000888531	0.0660589	1.18007	0.070023	-0.000666302
1765	rs27866986	4	42.8727	0.96326	0.070567	0.295332	0.0197952	1.26045	0.0900603	1.2719	0.0667482	0.55704	0.0523091	0.00683175	0.000888531	0.0660589	1.18007	0.070023	-0.000666302
1766	rs3147234	4	42.958	0.96326	0.070567	0.295332	0.0197952	1.26045	0.0900603	1.2719	0.0667482	0.55704	0.0523091	0.00683175	0.000888531	0.0660589	1.18007	0.070023	-0.000666302
1767	rs27851392	4	42.9656	0.96326	0.070567	0.295332	0.0197952	1.26045	0.0900603	1.2719	0.0667482	0.55704	0.0523091	0.00683175	0.000888531	0.0660589	1.18007	0.070023	-0.000666302
1768	rs46615358	4	43.9338	0.96326	0.070567	0.295332	0.0197952	1.26045	0.0900603	1.2719	0.0667482	0.55704	0.0523091	0.00683175	0.000888531	0.0660589	1.18007	0.070023	-0.000666302
1769	rs49584833	4	43.9542	0.96326	0.070567	0.295332	0.0197952	1.26045	0.0900603	1.2719	0.0667482	0.55704	0.0523091	0.00683175	0.000888531	0.0660589	1.18007	0.070023	-0.000666302
1770	rs235913780	4	44.2531	0.96326	0.070567	0.295332	0.0197952	1.26045	0.0900603	1.2719	0.0667482	0.55704	0.0523091	0.00683175	0.000888531	0.0660589	1.18007	0.070023	-0.000666302
1771	rs27847690	4	44.2606	0.96326	0.070567	0.295332	0.0197952	1.26045	0.0900603	1.2719	0.0667482	0.55704	0.0523091	0.00683175	0.000888531	0.0660589	1.18007	0.070023	-0.000666302
1772	rs246852090	4	45.419	0.96326	0.070567	0.295332	0.0197952	1.26045	0.0900603	1.2719	0.0667482	0.55704	0.0523091	0.00683175	0.000888531	0.0660589	1.18007	0.070023	-0.000666302
1773	rs13477678	4	45.4894	0.973622	0.0708114	0.397802	0.0249455	1.45454	0.0983616	1.30355	0.0675459	0.700941	0.0613329	0.0612446	0.00749903	0.03202	1.49458	0.0872606	-0.000810912
1774	rs28319700	4	45.8949	0.973622	0.0708114	0.397802	0.0249455	1.45454	0.0983616	1.30355	0.0675459	0.700941	0.0613329	0.0612446	0.00749903	0.03202	1.49458	0.0872606	-0.000810912
1775	rs28309268	4	45.949	0.804389	0.0663785	0.736073	0.0417652	1.70531	0.115951	1.93284	0.0909794	0.637087	0.060494	0.333388	0.0352515	0.00496954	2.30368	0.0841208	-0.00081778
1776	rs28309186	4	45.9657	0.804389	0.0663785	0.736073	0.0417652	1.70531	0.115951	1.93284	0.0909794	0.637087	0.060494	0.333388	0.0352515	0.00496954	2.30368	0.0841208	-0.00081778
1777	rs3694836	4	45.9729	0.842056	0.0699693	0.49163	0.0318018	1.3843	0.104545	1.70269	0.0862851	0.777941	0.0709464	0.184389	0.0220797	0.0158516	1.79993	0.245772	-0.00212707
1778	rs31881395	4	46.1532	0.842056	0.0699693	0.49163	0.0318018	1.3843	0.104545	1.70269	0.0862851	0.777941	0.0709464	0.184389	0.0220797	0.0158516	1.79993	0.245772	-0.00212707
1779	rs27816249	4	46.2761	0.842056	0.0699693	0.49163	0.0318018	1.3843	0.104545	1.70269	0.0862851	0.777941	0.0709464	0.184389	0.0220797	0.0158516	1.79993	0.245772	-0.00212707
1780	rs27816235	4	46.2801	0.842056	0.0699693	0.49163	0.0318018	1.3843	0.104545	1.70269	0.0862851	0.777941	0.0709464	0.184389	0.0220797	0.0158516	1.79993	0.245772	-0.00212707
1781	rs27785516	4	46.8553	0.842056	0.0699693	0.49163	0.0318018	1.3843	0.104545	1.70269	0.0862851	0.777941	0.0709464	0.184389	0.0220797	0.0158516	1.79993	0.245772	-0.00212707
1782	rs228463156	4	46.9145	0.773906	0.0667843	0.199214	0.0156577	1.25047	0.0991666	1.16951	0.0695289	0.55947	0.0570622	0.0439763	0.00604191	0.103942	0.983209	0.203164	-0.00185162
1783	rs3656433	4	46.9169	0.773906	0.0667843	0.199214	0.0156577	1.25047	0.0991666	1.16951	0.0695289	0.55947	0.0570622	0.0439763	0.00604191	0.103942	0.983209	0.203164	-0.00185162
1784	rs27844694	4	46.9234	0.773906	0.0667843	0.199214	0.0156577	1.25047	0.0991666	1.16951	0.0695289	0.55947	0.0570622	0.0439763	0.00604191	0.103942	0.983209	0.203164	-0.00185162
1785	rs32832996	4	47.0863	0.773906	0.0667843	0.199214	0.0156577	1.25047	0.0991666	1.16951	0.0695289	0.55947	0.0570622	0.0439763	0.00604191	0.103942	0.983209	0.203164	-0.00185162
1786	rs32659718	4	47.6995	0.969246	0.0749731	0.0588931	-0.00498825	0.800488	0.0710492	0.756156	0.0503576	0.153305	0.0191835	0.211639	-0.0240385	0.328058	0.484049	0.545257	-0.0038203
1787	rs27845668	4	49.5916	0.969246	0.0749731	0.0588931	-0.00498825	0.800488	0.0710492	0.756156	0.0503576	0.153305	0.0191835	0.211639	-0.0240385	0.328058	0.484049	0.545257	-0.0038203
1788	rs32434935	4	49.7206	0.969246	0.0749731	0.0588931	-0.00498825	0.800488	0.0710492	0.756156	0.0503576	0.153305	0.0191835	0.211639	-0.0240385	0.328058	0.484049	0.545257	-0.0038203
1789	rs13477695	4	49.7713	0.969246	0.0749731	0.0588931	-0.00498825	0.800488	0.0710492	0.756156	0.0503576	0.153305	0.0191835	0.211639	-0.0240385	0.328058	0.484049	0.545257	-0.0038203
1790	rs13477699	4	50.6828	0.969246	0.0749731	0.0588931	-0.00498825	0.800488	0.0710492	0.756156	0.0503576	0.153305	0.0191835	0.211639	-0.0240385	0.328058	0.484049	0.545257	-0.0038203
1791	rs6398138	4	50.8682	0.691164	0.0599408	0.236998	-0.0174474	0.472119	0.0488919	0.253262	0.0221018	0.113469	-0.0146938	0.25873	-0.0287094	0.674612	0.170946	0.131474	-0.00123116
1792	rs6325255	4	51.2816	0.691164	0.0599408	0.236998	-0.0174474	0.472119	0.0488919	0.253262	0.0221018	0.113469	-0.0146938	0.25873	-0.0287094	0.674612	0.170946	0.131474	-0.00123116
1793	rs27830962	4	52.5926	0.969246	0.0749731	0.0588931	-0.00498825	0.800488	0.0710492	0.756156	0.0503576	0.153305	0.0191835	0.211639	-0.0240385	0.328058	0.484049	0.545257	-0.0038203
1794	rs27793834	4	53.1427	0.969246	0.0749731	0.0588931	-0.00498825	0.800488	0.0710492	0.756156	0.0503576	0.153305	0.0191835	0.211639	-0.0240385	0.328058	0.484049	0.545257	-0.0038203
1795	rs45963956	4	53.9278	0.969246	0.0749731	0.0588931	-0.00498825	0.800488	0.0710492	0.756156	0.0503576	0.153305	0.0191835	0.211639	-0.0240385	0.328058	0.484049	0.545257	-0.0038203
1796	rs3667625	4	54.1949	0.520169	0.050939	0.179108	-0.0142743	0.594246	0.0608942	0.73785	0.052422	0.00449288	0.000672292	0.446787	-0.0458901	0.492216	0.307844	0.714644	-0.00476264
1797	rs6248902	4	54.8753	0.520169	0.050939	0.179108	-0.0142743	0.594246	0.0608942	0.73785	0.052422	0.00449288	0.000672292	0.446787	-0.0458901	0.492216	0.307844	0.714644	-0.00476264
1798	rs6161881	4	54.8986	0.520169	0.050939	0.179108	-0.0142743	0.594246	0.0608942	0.73785	0.052422	0.00449288	0.000672292	0.446787	-0.0458901	0.492216	0.307844	0.714644	-0.00476264
1799	rs32170040	4	54.9035	0.520169	0.050939	0.179108	-0.0142743	0.594246	0.0608942	0.73785	0.052422	0.00449288	0.000672292	0.446787	-0.0458901	0.492216	0.307844	0.714644	-0.00476264
1800	rs28320231	4	54.951	0.263318	0.0305827	0.483729	-0.0325357	0.168092	0.0227505	0.373341	0.0323886	0.0868666	-0.0121394	0.766499	-0.0697895	0.627929	0.202089	1.09733	-0.00647832
1801	rs32105820	4	55.401	0.263318	0.0305827	0.483729	-0.0325357	0.168092	0.0227505	0.373341	0.0323886	0.0868666	-0.0121394	0.766499	-0.0697895	0.627929	0.202089	1.09733	-0.00647832
1802	rs27789011	4	55.6119	0.263318	0.0305827	0.483729	-0.0325357	0.168092	0.0227505	0.373341	0.0323886	0.0868666	-0.0121394	0.766499	-0.0697895	0.627929	0.202089	1.09733	-0.00647832
1803	rs32935181	4	56.1866	0.263318	0.0305827	0.483729	-0.0325357	0.168092	0.0227505	0.373341	0.0323886	0.0868666	-0.0121394	0.766499	-0.0697895	0.627929	0.202089	1.09733	-0.00647832
1804	rs27790073	4	56.1987	0.0174076	0.00244651	0.594372	-0.0374605	0.22112	-0.0279247	0.13892	0.0138887	0.203318	-0.0256548	1.17266	-0.0910822	0.545097	0.263527	2.45002	-0.010241
1805	rs49831257	4	57.2742	0.184889	-0.022601	0.839746	-0.0482732	0.451115	-0.050013	0.0662883	0.00719274	0.357369	-0.0409273	1.40203	-0.103313	0.230486	0.637355	1.81761	-0.00877483
1806	rs31860994	4	57.3799	0.184889	-0.022601	0.839746	-0.0482732	0.451115	-0.050013	0.0662883	0.00719274	0.357369	-0.0409273	1.40203	-0.103313	0.230486	0.637355	1.81761	-0.00877483
1807	rs27838620	4	57.5	0.0817088	-0.0106354	0.950764	-0.050942	0.620447	-0.0614301	0.0374552	-0.00408231	0.473537	-0.0497648	1.10659	-0.0865143	0.238105	0.623232	1.4731	-0.00756011
1808	rs32816121	4	57.83	0.0817088	-0.0106354	0.950764	-0.050942	0.620447	-0.0614301	0.0374552	-0.00408231	0.473537	-0.0497648	1.10659	-0.0865143	0.238105	0.623232	1.4731	-0.00756011
1809	rs51842830	4	58.3226	0.0817088	-0.0106354	0.950764	-0.050942	0.620447	-0.0614301	0.0374552	-0.00408231	0.473537	-0.0497648	1.10659	-0.0865143	0.238105	0.623232	1.4731	-0.00756011
1810	rs31988585	4	58.3455	0.0809758	-0.0104616	1.03227	-0.0536377	0.680003	-0.0650568	0.0982741	-0.00999909	0.556132	-0.0560559	0.812641	-0.0695913	0.24066	0.618597	1.51067	-0.00767966
1811	rs33020761	4	58.3635	0.0706355	-0.00945913	0.625968	-0.0391606	0.764217	-0.0724073	0.0199732	-0.00225376	0.489264	-0.0519211	0.364193	-0.0400298	0.550489	0.259251	1.03723	-0.00624095
1812	rs27882800	4	58.374	0.0706355	-0.00945913	0.625968	-0.0391606	0.764217	-0.0724073	0.0199732	-0.00225376	0.489264	-0.0519211	0.364193	-0.0400298	0.550489	0.259251	1.03723	-0.00624095
1813	rs27850419	4	58.5179	0.0706355	-0.00945913	0.625968	-0.0391606	0.764217	-0.0724073	0.0199732	-0.00225376	0.489264	-0.0519211	0.364193	-0.0400298	0.550489	0.259251	1.03723	-0.00624095
1814	rs46814054	4	59.8116	0.0706355	-0.00945913	0.625968	-0.0391606	0.764217	-0.0724073	0.0199732	-0.00225376	0.489264	-0.0519211	0.364193	-0.0400298	0.550489	0.259251	1.03723	-0.00624095
1815	rs3712541	4	59.8353	0.0764809	-0.0100675	0.77876	-0.0451317	0.927529	-0.0812068	0.0325832	-0.00358261	0.649234	-0.0635553	0.461661	-0.0474985	0.335421	0.47441	1.00459	-0.006125
1816	rs27829140	4	59.8498	0.0764809	-0.0100675	0.77876	-0.0451317	0.927529	-0.0812068	0.0325832	-0.00358261	0.649234	-0.0635553	0.461661	-0.0474985	0.335421	0.47441	1.00459	-0.006125
1817	rs27829136	4	59.8508	0.180365	-0.0223987	0.681938	-0.0425539	0.733421	-0.0717654	0.0726636	0.00790655	0.519883	-0.0554026	0.653001	-0.0632368	0.362926	0.440182	1.28009	-0.00733043
1818	UNCHS011463	4	62.1951	0.180365	-0.0223987	0.681938	-0.0425539	0.733421	-0.0717654	0.0726636	0.00790655	0.519883	-0.0554026	0.653001	-0.0632368	0.362926	0.440182	1.28009	-0.00733043
1819	rs32497085	4	62.2931	0.180365	-0.0223987	0.681938	-0.0425539	0.733421	-0.0717654	0.0726636	0.00790655	0.519883	-0.0554026	0.653001	-0.0632368	0.362926	0.440182	1.28009	-0.00733043
1820	Alad	4	62.509	0.180365	-0.0223987	0.681938	-0.0425539	0.733421	-0.0717654	0.0726636	0.00790655	0.519883	-0.0554026	0.653001	-0.0632368	0.362926	0.440182	1.28009	-0.00733043
1821	rs28322212	4	62.609	0.180365	-0.0223987	0.681938	-0.0425539	0.733421	-0.0717654	0.0726636	0.00790655	0.519883	-0.0554026	0.653001	-0.0632368	0.362926	0.440182	1.28009	-0.00733043
1822	rs28321986	4	62.6502	0.180365	-0.0223987	0.681938	-0.0425539	0.733421	-0.0717654	0.0726636	0.00790655	0.519883	-0.0554026	0.653001	-0.0632368	0.362926	0.440182	1.28009	-0.00733043
1823	rs28313506	4	62.6923	0.192181	-0.0232372	1.12613	-0.0585675	0.659282	-0.0654849	0.00588059	-0.000675158	0.597148	-0.0607048	1.24003	-0.0946103	0.128561	0.890892	1.85505	-0.00897503
1824	rs3690581	4	62.7073	0.246428	-0.0288475	1.1652	-0.0602492	0.753634	-0.0721886	0.00166536	-0.000193435	0.728427	-0.0701938	1.28857	-0.0973848	0.0822701	1.08476	2.08779	-0.00966859
1825	rs3722114	4	62.9756	0.246428	-0.0288475	1.1652	-0.0602492	0.753634	-0.0721886	0.00166536	-0.000193435	0.728427	-0.0701938	1.28857	-0.0973848	0.0822701	1.08476	2.08779	-0.00966859
1826	rs27906064	4	63.02	0.324975	-0.0350362	1.09917	-0.0564004	0.706355	-0.0672864	0.17199	0.0165088	1.1068	-0.0886132	1.17155	-0.0891834	0.0489986	1.30982	1.58448	-0.00795379
1827	rs6244565	4	63.2713	0.617694	-0.056101	1.01091	-0.0528454	0.786	-0.0713635	0.00566705	0.000628263	1.9372	-0.122031	1.33687	-0.0957607	0.00997906	2.00091	1.34879	-0.00716229
1828	rs27907590	4	64.9823	0.617694	-0.056101	1.01091	-0.0528454	0.786	-0.0713635	0.00566705	0.000628263	1.9372	-0.122031	1.33687	-0.0957607	0.00997906	2.00091	1.34879	-0.00716229
1829	rs27886613	4	65.1274	0.617694	-0.056101	1.01091	-0.0528454	0.786	-0.0713635	0.00566705	0.000628263	1.9372	-0.122031	1.33687	-0.0957607	0.00997906	2.00091	1.34879	-0.00716229
1830	rs8275764	4	65.2315	0.617694	-0.056101	1.01091	-0.0528454	0.786	-0.0713635	0.00566705	0.000628263	1.9372	-0.122031	1.33687	-0.0957607	0.00997906	2.00091	1.34879	-0.00716229
1831	rs13477746	4	65.9442	0.617694	-0.056101	1.01091	-0.0528454	0.786	-0.0713635	0.00566705	0.000628263	1.9372	-0.122031	1.33687	-0.0957607	0.00997906	2.00091	1.34879	-0.00716229
1832	rs27886852	4	66.4584	0.617694	-0.056101	1.01091	-0.0528454	0.786	-0.0713635	0.00566705	0.000628263	1.9372	-0.122031	1.33687	-0.0957607	0.00997906	2.00091	1.34879	-0.00716229
1833	D4Mit178	4	67.182	0.634116	-0.0565125	0.988282	-0.051505	0.609738	-0.0589158	0.118583	-0.01161	1.86691	-0.118233	1.10241	-0.0837728	0.0173799	1.75995	1.33108	-0.00713666
1834	rs27855426	4	70.0551	0.634116	-0.0565125	0.988282	-0.051505	0.609738	-0.0589158	0.118583	-0.01161	1.86691	-0.118233	1.10241	-0.0837728	0.0173799	1.75995	1.33108	-0.00713666
1835	rs245036136	4	70.0885	0.463721	-0.0423389	0.402363	-0.0256223	0.300033	-0.0323834	0.0613198	0.00595304	0.83298	-0.0686548	0.682001	-0.0572927	0.39655	0.401702	0.660772	-0.00431787
1836	rs27871184	4	70.2827	0.220199	-0.0235646	0.445157	-0.0277943	0.244509	-0.0276072	0.230601	0.0195194	0.358571	-0.0375333	0.562216	-0.0501521	0.660395	0.180196	0.797546	-0.00492956
1837	rs31809732	4	71.28	0.220199	-0.0235646	0.445157	-0.0277943	0.244509	-0.0276072	0.230601	0.0195194	0.358571	-0.0375333	0.562216	-0.0501521	0.660395	0.180196	0.797546	-0.00492956
1838	rs27857901	4	71.4734	0.220199	-0.0235646	0.445157	-0.0277943	0.244509	-0.0276072	0.230601	0.0195194	0.358571	-0.0375333	0.562216	-0.0501521	0.660395	0.180196	0.797546	-0.00492956
1839	rs27870931	4	72.0163	0.220199	-0.0235646	0.445157	-0.0277943	0.244509	-0.0276072	0.230601	0.0195194	0.358571	-0.0375333	0.562216	-0.0501521	0.660395	0.180196	0.797546	-0.00492956
1840	rs27840136	4	72.1383	0.154151	-0.0178761	0.468164	-0.0297218	0.263278	-0.0301192	0.0557108	0.00562774	0.14557	-0.018447	0.622109	-0.0554924	0.795193	0.0995273	1.09237	-0.00628089
1841	rs212915515	4	74.2278	0.154151	-0.0178761	0.468164	-0.0297218	0.263278	-0.0301192	0.0557108	0.00562774	0.14557	-0.018447	0.622109	-0.0554924	0.795193	0.0995273	1.09237	-0.00628089
1842	rs28098609	4	74.2436	0.317148	-0.0340086	0.591089	-0.0365912	0.412366	-0.0448969	0.19385	-0.0181525	0.187891	-0.0236569	0.483379	-0.0481873	0.610203	0.214526	1.18752	-0.00679019
1843	rs28082270	4	74.3916	0.122645	-0.0144878	0.423756	-0.0272777	0.156618	-0.0192956	0.00929206	-0.0009811	0.11199	-0.0145036	0.635467	-0.0561534	0.875395	0.0577959	1.36045	-0.00725936
1844	rs28035283	4	75.7927	0.122645	-0.0144878	0.423756	-0.0272777	0.156618	-0.0192956	0.00929206	-0.0009811	0.11199	-0.0145036	0.635467	-0.0561534	0.875395	0.0577959	1.36045	-0.00725936
1845	rs33000280	4	75.8249	0.122645	-0.0144878	0.423756	-0.0272777	0.156618	-0.0192956	0.00929206	-0.0009811	0.11199	-0.0145036	0.635467	-0.0561534	0.875395	0.0577959	1.36045	-0.00725936
1846	rs28019260	4	75.8408	0.0730781	-0.00942729	0.512075	-0.0329305	0.227461	-0.027719	0.1404	-0.0136128	0.0701944	-0.0098409	0.746086	-0.0654801	0.773468	0.111558	1.76506	-0.00883721
1847	rs28019230	4	75.8473	0.0730781	-0.00942729	0.512075	-0.0329305	0.227461	-0.027719	0.1404	-0.0136128	0.0701944	-0.0098409	0.746086	-0.0654801	0.773468	0.111558	1.76506	-0.00883721
1848	rs28052626	4	76.0129	0.0607051	-0.00786274	0.218274	-0.016647	0.259494	-0.0306504	0.05624	-0.00583903	0.0268542	-0.0038965	0.311789	-0.0340275	0.977433	0.00991298	1.24101	-0.0070788
1849	rs49734466	4	76.8573	0.0607051	-0.00786274	0.218274	-0.016647	0.259494	-0.0306504	0.05624	-0.00583903	0.0268542	-0.0038965	0.311789	-0.0340275	0.977433	0.00991298	1.24101	-0.0070788
1850	UNC040517254	4	78.9009	0.0607051	-0.00786274	0.218274	-0.016647	0.259494	-0.0306504	0.05624	-0.00583903	0.0268542	-0.0038965	0.311789	-0.0340275	0.977433	0.00991298	1.24101	-0.0070788
1851	rs32586854	4	78.9018	0.0607051	-0.00786274	0.218274	-0.016647	0.259494	-0.0306504	0.05624	-0.00583903	0.0268542	-0.0038965	0.311789	-0.0340275	0.977433	0.00991298	1.24101	-0.0070788
1852	rs13477796	4	79.0522	0.0607051	-0.00786274	0.218274	-0.016647	0.259494	-0.0306504	0.05624	-0.00583903	0.0268542	-0.0038965	0.311789	-0.0340275	0.977433	0.00991298	1.24101	-0.0070788
1853	rs3708061	4	81.3042	0.0607051	-0.00786274	0.218274	-0.016647	0.259494	-0.0306504	0.05624	-0.00583903	0.0268542	-0.0038965	0.311789	-0.0340275	0.977433	0.00991298	1.24101	-0.0070788
1854	rs32862298	4	81.4557	0.0607051	-0.00786274	0.218274	-0.016647	0.259494	-0.0306504	0.05624	-0.00583903	0.0268542	-0.0038965	0.311789	-0.0340275	0.977433	0.00991298	1.24101	-0.0070788
1855	rs227588806	4	81.7267	0.0607051	-0.00786274	0.218274	-0.016647	0.259494	-0.0306504	0.05624	-0.00583903	0.0268542	-0.0038965	0.311789	-0.0340275	0.977433	0.00991298	1.24101	-0.0070788
1856	rs13477804	4	81.9587	0.0607051	-0.00786274	0.218274	-0.016647	0.259494	-0.0306504	0.05624	-0.00583903	0.0268542	-0.0038965	0.311789	-0.0340275	0.977433	0.00991298	1.24101	-0.0070788
1857	rs28104634	4	82.478	0.0607051	-0.00786274	0.218274	-0.016647	0.259494	-0.0306504	0.05624	-0.00583903	0.0268542	-0.0038965	0.311789	-0.0340275	0.977433	0.00991298	1.24101	-0.0070788
1858	rs28104483	4	82.5234	0.241067	-0.0284772	0.351195	-0.0258948	0.574981	-0.060275	0.271955	-0.0251602	0.0910072	-0.0129348	0.185926	-0.0234393	0.792658	0.100914	1.07979	-0.00665372
1859	rs32175061	4	82.5423	0.306367	-0.0345688	0.266004	-0.020633	0.518144	-0.0557622	0.258701	-0.0241047	0.0744622	-0.0106981	0.401878	-0.0438764	0.752571	0.123452	1.06202	-0.00654112
1860	rs28317703	4	83.2299	0.306367	-0.0345688	0.266004	-0.020633	0.518144	-0.0557622	0.258701	-0.0241047	0.0744622	-0.0106981	0.401878	-0.0438764	0.752571	0.123452	1.06202	-0.00654112
1861	rs32084982	4	83.2515	0.306367	-0.0345688	0.266004	-0.020633	0.518144	-0.0557622	0.258701	-0.0241047	0.0744622	-0.0106981	0.401878	-0.0438764	0.752571	0.123452	1.06202	-0.00654112
1862	rs32357093	4	83.5528	0.306367	-0.0345688	0.266004	-0.020633	0.518144	-0.0557622	0.258701	-0.0241047	0.0744622	-0.0106981	0.401878	-0.0438764	0.752571	0.123452	1.06202	-0.00654112
1863	rs28068386	4	83.8887	0.306367	-0.0345688	0.266004	-0.020633	0.518144	-0.0557622	0.258701	-0.0241047	0.0744622	-0.0106981	0.401878	-0.0438764	0.752571	0.123452	1.06202	-0.00654112
1864	rs28068204	4	83.9211	0.306367	-0.0345688	0.266004	-0.020633	0.518144	-0.0557622	0.258701	-0.0241047	0.0744622	-0.0106981	0.401878	-0.0438764	0.752571	0.123452	1.06202	-0.00654112
1865	rs3700579	4	83.9393	0.306367	-0.0345688	0.266004	-0.020633	0.518144	-0.0557622	0.258701	-0.0241047	0.0744622	-0.0106981	0.401878	-0.0438764	0.752571	0.123452	1.06202	-0.00654112
1866	rs28113522	4	84.6399	0.306367	-0.0345688	0.266004	-0.020633	0.518144	-0.0557622	0.258701	-0.0241047	0.0744622	-0.0106981	0.401878	-0.0438764	0.752571	0.123452	1.06202	-0.00654112
1867	rs28099134	4	84.752	0.135045	-0.0178467	0.457219	-0.032692	0.473591	-0.0540542	0.187186	-0.0189998	0.217491	-0.0285504	0.142758	-0.019223	0.827977	0.0819815	0.721489	-0.00515145
1868	rs32637613	4	85.4912	0.135045	-0.0178467	0.457219	-0.032692	0.473591	-0.0540542	0.187186	-0.0189998	0.217491	-0.0285504	0.142758	-0.019223	0.827977	0.0819815	0.721489	-0.00515145
1869	rs28116511	4	85.6134	0.135045	-0.0178467	0.457219	-0.032692	0.473591	-0.0540542	0.187186	-0.0189998	0.217491	-0.0285504	0.142758	-0.019223	0.827977	0.0819815	0.721489	-0.00515145
1870	rs28098394	4	86.4013	0.135045	-0.0178467	0.457219	-0.032692	0.473591	-0.0540542	0.187186	-0.0189998	0.217491	-0.0285504	0.142758	-0.019223	0.827977	0.0819815	0.721489	-0.00515145
1871	rs32766609	4	86.451	0.0199061	0.00279039	0.303723	-0.0226203	0.183935	-0.0239319	0.00655341	0.000745378	0.13301	-0.0179477	0.270281	-0.0314916	0.979029	0.00920433	0.873337	-0.00572838
1872	rs6352351	4	87.4915	0.0199061	0.00279039	0.303723	-0.0226203	0.183935	-0.0239319	0.00655341	0.000745378	0.13301	-0.0179477	0.270281	-0.0314916	0.979029	0.00920433	0.873337	-0.00572838
1873	rs47960771	4	87.7181	0.00894852	0.00127279	0.63627	-0.0396842	0.152027	-0.0203205	0.0697965	-0.0074453	0.187214	-0.0242925	0.693981	-0.0644434	0.781138	0.107272	1.29965	-0.00746495
1874	rs33004800	4	87.9126	0.00894852	0.00127279	0.63627	-0.0396842	0.152027	-0.0203205	0.0697965	-0.0074453	0.187214	-0.0242925	0.693981	-0.0644434	0.781138	0.107272	1.29965	-0.00746495
1875	rs28097819	4	88.0457	0.00894852	0.00127279	0.63627	-0.0396842	0.152027	-0.0203205	0.0697965	-0.0074453	0.187214	-0.0242925	0.693981	-0.0644434	0.781138	0.107272	1.29965	-0.00746495
1876	rs28082017	4	88.2185	0.00894852	0.00127279	0.63627	-0.0396842	0.152027	-0.0203205	0.0697965	-0.0074453	0.187214	-0.0242925	0.693981	-0.0644434	0.781138	0.107272	1.29965	-0.00746495
1877	rs28059331	4	88.3046	0.00894852	0.00127279	0.63627	-0.0396842	0.152027	-0.0203205	0.0697965	-0.0074453	0.187214	-0.0242925	0.693981	-0.0644434	0.781138	0.107272	1.29965	-0.00746495
1878	rs28099968	4	88.5211	0.00894852	0.00127279	0.63627	-0.0396842	0.152027	-0.0203205	0.0697965	-0.0074453	0.187214	-0.0242925	0.693981	-0.0644434	0.781138	0.107272	1.29965	-0.00746495
1879	rs28084008	4	88.554	0.00900979	0.00128632	0.56364	-0.0363452	0.110018	-0.0153148	0.0106009	-0.00120828	0.127817	-0.0173787	0.963082	-0.0812176	0.767999	0.114639	1.26309	-0.00731231
1880	rs32748881	4	88.8075	0.00900979	0.00128632	0.56364	-0.0363452	0.110018	-0.0153148	0.0106009	-0.00120828	0.127817	-0.0173787	0.963082	-0.0812176	0.767999	0.114639	1.26309	-0.00731231
1881	rs13477831	4	88.9517	0.00900979	0.00128632	0.56364	-0.0363452	0.110018	-0.0153148	0.0106009	-0.00120828	0.127817	-0.0173787	0.963082	-0.0812176	0.767999	0.114639	1.26309	-0.00731231
1882	rs32364936	4	89.2464	0.00900979	0.00128632	0.56364	-0.0363452	0.110018	-0.0153148	0.0106009	-0.00120828	0.127817	-0.0173787	0.963082	-0.0812176	0.767999	0.114639	1.26309	-0.00731231
1883	rs28125691	4	89.4845	0.00900979	0.00128632	0.56364	-0.0363452	0.110018	-0.0153148	0.0106009	-0.00120828	0.127817	-0.0173787	0.963082	-0.0812176	0.767999	0.114639	1.26309	-0.00731231
1884	rs13477836	4	90.3117	0.0687518	-0.00885202	0.234305	-0.0175897	0.0351796	0.0050279	0.181958	0.0169446	0.0663995	-0.009288	0.94498	-0.0770818	0.854081	0.068501	1.42428	-0.00776916
1885	rs13477838	4	91.1213	0.0687518	-0.00885202	0.234305	-0.0175897	0.0351796	0.0050279	0.181958	0.0169446	0.0663995	-0.009288	0.94498	-0.0770818	0.854081	0.068501	1.42428	-0.00776916
1886	rs3663299	4	94.4324	0.0687518	-0.00885202	0.234305	-0.0175897	0.0351796	0.0050279	0.181958	0.0169446	0.0663995	-0.009288	0.94498	-0.0770818	0.854081	0.068501	1.42428	-0.00776916
1887	rs32133037	4	94.4589	0.236719	-0.027234	0.483525	-0.0320203	0.153117	-0.0200766	0.139441	-0.0137617	0.436122	-0.0477435	1.06532	-0.0857127	0.480093	0.318675	0.740479	-0.0052125
1888	rs28157390	4	94.5765	0.236719	-0.027234	0.483525	-0.0320203	0.153117	-0.0200766	0.139441	-0.0137617	0.436122	-0.0477435	1.06532	-0.0857127	0.480093	0.318675	0.740479	-0.0052125
1889	rs28157280	4	94.6392	0.235106	-0.0269266	0.550058	-0.0351698	0.196179	-0.0247017	0.211076	-0.0195714	0.519358	-0.0545001	0.783172	-0.069094	0.487484	0.312039	0.766945	-0.00535029
1890	rs33010716	4	95.5039	0.235106	-0.0269266	0.550058	-0.0351698	0.196179	-0.0247017	0.211076	-0.0195714	0.519358	-0.0545001	0.783172	-0.069094	0.487484	0.312039	0.766945	-0.00535029
1891	rs28112569	4	95.653	0.380185	-0.0412	0.869127	-0.0501814	0.337682	-0.0400484	0.22178	-0.0212167	0.819201	-0.0779584	0.714503	-0.0672619	0.220661	0.656274	0.82675	-0.00576413
1892	rs28081143	4	95.7447	0.380185	-0.0412	0.869127	-0.0501814	0.337682	-0.0400484	0.22178	-0.0212167	0.819201	-0.0779584	0.714503	-0.0672619	0.220661	0.656274	0.82675	-0.00576413
1893	rs28081138	4	95.7454	0.308373	-0.0349147	1.00495	-0.0554503	0.38481	-0.0443602	0.233869	-0.0221809	0.854603	-0.0803952	0.431104	-0.0464378	0.251536	0.599401	0.837875	-0.00583358
1894	rs3687764	4	95.7494	0.308373	-0.0349147	1.00495	-0.0554503	0.38481	-0.0443602	0.233869	-0.0221809	0.854603	-0.0803952	0.431104	-0.0464378	0.251536	0.599401	0.837875	-0.00583358
1895	rs28114768	4	95.9183	0.308373	-0.0349147	1.00495	-0.0554503	0.38481	-0.0443602	0.233869	-0.0221809	0.854603	-0.0803952	0.431104	-0.0464378	0.251536	0.599401	0.837875	-0.00583358
1896	rs28138719	4	96.8969	0.0455942	-0.00587746	0.371529	-0.02544	0.102688	-0.0132651	0.3018	-0.025086	0.615588	-0.0619118	0.199363	-0.0230908	0.820212	0.0860741	0.385652	-0.00326238
1897	rs28138717	4	96.8973	0.0455942	-0.00587746	0.371529	-0.02544	0.102688	-0.0132651	0.3018	-0.025086	0.615588	-0.0619118	0.199363	-0.0230908	0.820212	0.0860741	0.385652	-0.00326238
1898	rs32671645	4	98.3698	0.0455942	-0.00587746	0.371529	-0.02544	0.102688	-0.0132651	0.3018	-0.025086	0.615588	-0.0619118	0.199363	-0.0230908	0.820212	0.0860741	0.385652	-0.00326238
1899	rs32346380	4	98.6917	0.0455942	-0.00587746	0.371529	-0.02544	0.102688	-0.0132651	0.3018	-0.025086	0.615588	-0.0619118	0.199363	-0.0230908	0.820212	0.0860741	0.385652	-0.00326238
1900	rs13477866	4	99.3201	0.0455942	-0.00587746	0.371529	-0.02544	0.102688	-0.0132651	0.3018	-0.025086	0.615588	-0.0619118	0.199363	-0.0230908	0.820212	0.0860741	0.385652	-0.00326238
1901	rs13477873	4	101.43	0.0455942	-0.00587746	0.371529	-0.02544	0.102688	-0.0132651	0.3018	-0.025086	0.615588	-0.0619118	0.199363	-0.0230908	0.820212	0.0860741	0.385652	-0.00326238
1902	rs28181732	4	102.851	0.0455942	-0.00587746	0.371529	-0.02544	0.102688	-0.0132651	0.3018	-0.025086	0.615588	-0.0619118	0.199363	-0.0230908	0.820212	0.0860741	0.385652	-0.00326238
1903	rs28186732	4	103.635	0.0419801	0.00527704	0.148116	-0.0114335	0.0126722	-0.0017566	0.170663	-0.0151964	0.177406	-0.0217449	0.0126383	-0.00168419	0.997791	0.000960492	0.203095	-0.00180595
1904	rs13477881	4	103.641	0.038179	0.00494098	0.00803205	-0.000725136	0.106509	0.0138384	0.0780925	-0.00774258	0.259469	-0.0304729	0.0972191	0.0122043	0.99729	0.00117856	0.0529766	-0.000540214
1905	rs28166983	4	103.682	0.147784	0.0172436	0.00987799	0.000884285	0.0666475	0.00899935	0.2279	-0.0199561	0.148853	-0.0187484	0.41717	0.0416592	0.967565	0.01432	0.0986157	0.000945491
1906	rs28141328	4	103.875	0.147784	0.0172436	0.00987799	0.000884285	0.0666475	0.00899935	0.2279	-0.0199561	0.148853	-0.0187484	0.41717	0.0416592	0.967565	0.01432	0.0986157	0.000945491
1907	rs32319287	4	104.004	0.147784	0.0172436	0.00987799	0.000884285	0.0666475	0.00899935	0.2279	-0.0199561	0.148853	-0.0187484	0.41717	0.0416592	0.967565	0.01432	0.0986157	0.000945491
1908	rs32964865	4	104.157	0.147784	0.0172436	0.00987799	0.000884285	0.0666475	0.00899935	0.2279	-0.0199561	0.148853	-0.0187484	0.41717	0.0416592	0.967565	0.01432	0.0986157	0.000945491
1909	rs3726736	4	104.166	0.147784	0.0172436	0.00987799	0.000884285	0.0666475	0.00899935	0.2279	-0.0199561	0.148853	-0.0187484	0.41717	0.0416592	0.967565	0.01432	0.0986157	0.000945491
1910	rs51514865	4	104.584	0.147784	0.0172436	0.00987799	0.000884285	0.0666475	0.00899935	0.2279	-0.0199561	0.148853	-0.0187484	0.41717	0.0416592	0.967565	0.01432	0.0986157	0.000945491
1911	rs28168986	4	105.245	0.147784	0.0172436	0.00987799	0.000884285	0.0666475	0.00899935	0.2279	-0.0199561	0.148853	-0.0187484	0.41717	0.0416592	0.967565	0.01432	0.0986157	0.000945491
1912	rs32095190	4	105.249	0.576241	-0.0521047	0.0455545	-0.00394806	0.154745	-0.0194237	0.506073	-0.0378188	0.715695	-0.0664983	0.14652	0.0176893	0.626724	0.202924	0.335304	0.00271337
1913	rs28169629	4	105.446	0.065772	-0.00821147	0.170732	0.0129424	0.12915	0.016305	0.300284	-0.0249023	0.355468	-0.0386022	0.318106	0.0334563	0.907341	0.0422294	0.0252992	-0.000259665
1914	rs28169619	4	105.447	0.576241	-0.0521047	0.0455545	-0.00394806	0.154745	-0.0194237	0.506073	-0.0378188	0.715695	-0.0664983	0.14652	0.0176893	0.626724	0.202924	0.335304	0.00271337
1915	rs28153610	4	105.467	0.576241	-0.0521047	0.0455545	-0.00394806	0.154745	-0.0194237	0.506073	-0.0378188	0.715695	-0.0664983	0.14652	0.0176893	0.626724	0.202924	0.335304	0.00271337
1916	rs28136596	4	105.574	0.82497	-0.0664928	0.0555195	0.00471761	0.195413	-0.0235832	0.601668	-0.0426056	0.504798	-0.0510733	0.0350268	-0.00465588	0.597413	0.223725	0.127221	0.00119001
1917	rs239687939	4	107.204	0.82497	-0.0664928	0.0555195	0.00471761	0.195413	-0.0235832	0.601668	-0.0426056	0.504798	-0.0510733	0.0350268	-0.00465588	0.597413	0.223725	0.127221	0.00119001
1918	rs3721642	4	107.226	0.82497	-0.0664928	0.0555195	0.00471761	0.195413	-0.0235832	0.601668	-0.0426056	0.504798	-0.0510733	0.0350268	-0.00465588	0.597413	0.223725	0.127221	0.00119001
1919	rs28127052	4	107.425	0.82497	-0.0664928	0.0555195	0.00471761	0.195413	-0.0235832	0.601668	-0.0426056	0.504798	-0.0510733	0.0350268	-0.00465588	0.597413	0.223725	0.127221	0.00119001
1920	rs28148311	4	107.549	0.82497	-0.0664928	0.0555195	0.00471761	0.195413	-0.0235832	0.601668	-0.0426056	0.504798	-0.0510733	0.0350268	-0.00465588	0.597413	0.223725	0.127221	0.00119001
1921	rs28162181	4	107.843	0.82497	-0.0664928	0.0555195	0.00471761	0.195413	-0.0235832	0.601668	-0.0426056	0.504798	-0.0510733	0.0350268	-0.00465588	0.597413	0.223725	0.127221	0.00119001
1922	rs28128000	4	107.965	0.91979	-0.0749627	0.0829515	0.00715564	0.143357	-0.0188304	0.662877	-0.0477779	0.462503	-0.0498883	0.0593711	0.00804434	0.551846	0.258182	0.320155	0.00270697
1923	rs236723228	4	108.227	0.91979	-0.0749627	0.0829515	0.00715564	0.143357	-0.0188304	0.662877	-0.0477779	0.462503	-0.0498883	0.0593711	0.00804434	0.551846	0.258182	0.320155	0.00270697
1924	rs28148673	4	108.49	0.646471	-0.0592449	0.0247454	-0.00228594	0.103609	-0.0141733	0.558685	-0.0425412	0.675769	-0.0666367	0.287955	0.0326678	0.565287	0.247731	0.596678	0.00437998
1925	rs51569534	4	108.537	0.646471	-0.0592449	0.0247454	-0.00228594	0.103609	-0.0141733	0.558685	-0.0425412	0.675769	-0.0666367	0.287955	0.0326678	0.565287	0.247731	0.596678	0.00437998
1926	rs3664637	4	108.564	0.086339	-0.0111818	0.12482	0.0103732	0.123972	0.0165682	0.409936	-0.0336939	0.273663	-0.0329812	0.410697	0.0431417	0.883912	0.0535909	0.0431571	0.000457649
1927	rs28132552	4	108.894	0.086339	-0.0111818	0.12482	0.0103732	0.123972	0.0165682	0.409936	-0.0336939	0.273663	-0.0329812	0.410697	0.0431417	0.883912	0.0535909	0.0431571	0.000457649
1928	rs28127730	4	109.17	0.086339	-0.0111818	0.12482	0.0103732	0.123972	0.0165682	0.409936	-0.0336939	0.273663	-0.0329812	0.410697	0.0431417	0.883912	0.0535909	0.0431571	0.000457649
1929	rs28127592	4	109.216	0.086339	-0.0111818	0.12482	0.0103732	0.123972	0.0165682	0.409936	-0.0336939	0.273663	-0.0329812	0.410697	0.0431417	0.883912	0.0535909	0.0431571	0.000457649
1930	rs50723740	4	109.398	0.086339	-0.0111818	0.12482	0.0103732	0.123972	0.0165682	0.409936	-0.0336939	0.273663	-0.0329812	0.410697	0.0431417	0.883912	0.0535909	0.0431571	0.000457649
1931	rs3680956	4	109.874	0.086339	-0.0111818	0.12482	0.0103732	0.123972	0.0165682	0.409936	-0.0336939	0.273663	-0.0329812	0.410697	0.0431417	0.883912	0.0535909	0.0431571	0.000457649
1932	rs32854841	4	109.878	0.0678548	-0.008759	0.0230611	-0.00208791	0.0378753	0.00538482	0.735057	-0.0507677	0.559478	-0.0570422	0.122434	0.0154292	0.849685	0.070742	0.207236	-0.00188613
1933	rs3703879	4	111.211	0.0678548	-0.008759	0.0230611	-0.00208791	0.0378753	0.00538482	0.735057	-0.0507677	0.559478	-0.0570422	0.122434	0.0154292	0.849685	0.070742	0.207236	-0.00188613
1934	rs32723992	4	111.253	0.0413411	0.00533811	0.0264278	0.00233268	0.126448	0.01608	0.310144	-0.0258985	0.497856	-0.0516484	0.0257397	0.00349442	0.966281	0.0148966	0.169833	-0.00158292
1935	rs28303726	4	111.311	0.0413411	0.00533811	0.0264278	0.00233268	0.126448	0.01608	0.310144	-0.0258985	0.497856	-0.0516484	0.0257397	0.00349442	0.966281	0.0148966	0.169833	-0.00158292
1936	rs32615342	4	114.614	0.0413411	0.00533811	0.0264278	0.00233268	0.126448	0.01608	0.310144	-0.0258985	0.497856	-0.0516484	0.0257397	0.00349442	0.966281	0.0148966	0.169833	-0.00158292
1937	rs46019551	4	114.788	0.253523	0.0281287	0.00291856	0.000274363	0.185644	0.0232601	0.123531	-0.012236	0.130108	-0.017545	0.098038	0.0128337	0.988883	0.00485512	0.264338	-0.00236895
1938	rs47460195	4	114.823	0.253523	0.0281287	0.00291856	0.000274363	0.185644	0.0232601	0.123531	-0.012236	0.130108	-0.017545	0.098038	0.0128337	0.988883	0.00485512	0.264338	-0.00236895
1939	rs52263933	4	116.751	0.24449	0.0269232	0.0723593	0.00621135	0.265473	0.0308745	0.0733912	-0.00748991	0.164129	-0.0211573	0.162603	0.0198099	0.972014	0.0123275	0.169454	-0.00159836
1940	rs32445859	4	116.871	0.24449	0.0269232	0.0723593	0.00621135	0.265473	0.0308745	0.0733912	-0.00748991	0.164129	-0.0211573	0.162603	0.0198099	0.972014	0.0123275	0.169454	-0.00159836
1941	rs13477933	4	117.11	0.24449	0.0269232	0.0723593	0.00621135	0.265473	0.0308745	0.0733912	-0.00748991	0.164129	-0.0211573	0.162603	0.0198099	0.972014	0.0123275	0.169454	-0.00159836
1942	rs28272806	4	117.909	0.253523	0.0281287	0.00291856	0.000274363	0.185644	0.0232601	0.123531	-0.012236	0.130108	-0.017545	0.098038	0.0128337	0.988883	0.00485512	0.264338	-0.00236895
1943	rs28256540	4	117.933	0.253523	0.0281287	0.00291856	0.000274363	0.185644	0.0232601	0.123531	-0.012236	0.130108	-0.017545	0.098038	0.0128337	0.988883	0.00485512	0.264338	-0.00236895
1944	rs27509845	4	118.281	0.253523	0.0281287	0.00291856	0.000274363	0.185644	0.0232601	0.123531	-0.012236	0.130108	-0.017545	0.098038	0.0128337	0.988883	0.00485512	0.264338	-0.00236895
1945	rs13477940	4	118.599	0.253523	0.0281287	0.00291856	0.000274363	0.185644	0.0232601	0.123531	-0.012236	0.130108	-0.017545	0.098038	0.0128337	0.988883	0.00485512	0.264338	-0.00236895
1946	rs32249079	4	118.7	0.253523	0.0281287	0.00291856	0.000274363	0.185644	0.0232601	0.123531	-0.012236	0.130108	-0.017545	0.098038	0.0128337	0.988883	0.00485512	0.264338	-0.00236895
1947	rs27509419	4	118.754	0.253523	0.0281287	0.00291856	0.000274363	0.185644	0.0232601	0.123531	-0.012236	0.130108	-0.017545	0.098038	0.0128337	0.988883	0.00485512	0.264338	-0.00236895
1948	rs32786446	4	119.299	0.253523	0.0281287	0.00291856	0.000274363	0.185644	0.0232601	0.123531	-0.012236	0.130108	-0.017545	0.098038	0.0128337	0.988883	0.00485512	0.264338	-0.00236895
1949	rs27475809	4	119.382	0.253523	0.0281287	0.00291856	0.000274363	0.185644	0.0232601	0.123531	-0.012236	0.130108	-0.017545	0.098038	0.0128337	0.988883	0.00485512	0.264338	-0.00236895
1950	rs27516048	4	119.799	0.37478	0.0384155	0.212732	-0.0165627	0.0261315	0.00378346	0.369183	-0.0307526	0.196011	-0.0250862	0.116826	0.0150231	0.917749	0.0372762	0.168054	-0.00161751
1951	rs27501811	4	119.936	0.37478	0.0384155	0.212732	-0.0165627	0.0261315	0.00378346	0.369183	-0.0307526	0.196011	-0.0250862	0.116826	0.0150231	0.917749	0.0372762	0.168054	-0.00161751
1952	UNC040267805	4	119.978	0.37478	0.0384155	0.212732	-0.0165627	0.0261315	0.00378346	0.369183	-0.0307526	0.196011	-0.0250862	0.116826	0.0150231	0.917749	0.0372762	0.168054	-0.00161751
1953	rs27487202	4	120.226	0.37478	0.0384155	0.212732	-0.0165627	0.0261315	0.00378346	0.369183	-0.0307526	0.196011	-0.0250862	0.116826	0.0150231	0.917749	0.0372762	0.168054	-0.00161751
1954	rs28308538	4	120.251	0.37478	0.0384155	0.212732	-0.0165627	0.0261315	0.00378346	0.369183	-0.0307526	0.196011	-0.0250862	0.116826	0.0150231	0.917749	0.0372762	0.168054	-0.00161751
1955	rs239378141	4	120.294	0.37478	0.0384155	0.212732	-0.0165627	0.0261315	0.00378346	0.369183	-0.0307526	0.196011	-0.0250862	0.116826	0.0150231	0.917749	0.0372762	0.168054	-0.00161751
1956	rs50259371	4	120.747	0.37478	0.0384155	0.212732	-0.0165627	0.0261315	0.00378346	0.369183	-0.0307526	0.196011	-0.0250862	0.116826	0.0150231	0.917749	0.0372762	0.168054	-0.00161751
1957	rs32986699	4	120.944	0.37478	0.0384155	0.212732	-0.0165627	0.0261315	0.00378346	0.369183	-0.0307526	0.196011	-0.0250862	0.116826	0.0150231	0.917749	0.0372762	0.168054	-0.00161751
1958	rs27518087	4	121.024	0.37478	0.0384155	0.212732	-0.0165627	0.0261315	0.00378346	0.369183	-0.0307526	0.196011	-0.0250862	0.116826	0.0150231	0.917749	0.0372762	0.168054	-0.00161751
1959	rs27518021	4	121.044	0.23604	0.0257457	0.310839	-0.0220918	0.234577	-0.0275922	0.544694	-0.0400548	0.468397	-0.0502045	0.0606816	0.00798135	0.741336	0.129985	0.502455	-0.00387551
1960	rs3675629	4	121.059	0.23604	0.0257457	0.310839	-0.0220918	0.234577	-0.0275922	0.544694	-0.0400548	0.468397	-0.0502045	0.0606816	0.00798135	0.741336	0.129985	0.502455	-0.00387551
1961	rs13477948	4	121.203	0.23604	0.0257457	0.310839	-0.0220918	0.234577	-0.0275922	0.544694	-0.0400548	0.468397	-0.0502045	0.0606816	0.00798135	0.741336	0.129985	0.502455	-0.00387551
1962	rs27484134	4	121.397	0.23604	0.0257457	0.310839	-0.0220918	0.234577	-0.0275922	0.544694	-0.0400548	0.468397	-0.0502045	0.0606816	0.00798135	0.741336	0.129985	0.502455	-0.00387551
1963	rs27501078	4	121.694	0.23604	0.0257457	0.310839	-0.0220918	0.234577	-0.0275922	0.544694	-0.0400548	0.468397	-0.0502045	0.0606816	0.00798135	0.741336	0.129985	0.502455	-0.00387551
1964	rs28258182	4	122.86	0.23604	0.0257457	0.310839	-0.0220918	0.234577	-0.0275922	0.544694	-0.0400548	0.468397	-0.0502045	0.0606816	0.00798135	0.741336	0.129985	0.502455	-0.00387551
1965	rs27567417	4	123.999	0.23604	0.0257457	0.310839	-0.0220918	0.234577	-0.0275922	0.544694	-0.0400548	0.468397	-0.0502045	0.0606816	0.00798135	0.741336	0.129985	0.502455	-0.00387551
1966	rs13477959	4	124.196	0.23604	0.0257457	0.310839	-0.0220918	0.234577	-0.0275922	0.544694	-0.0400548	0.468397	-0.0502045	0.0606816	0.00798135	0.741336	0.129985	0.502455	-0.00387551
1967	rs3714811	4	124.208	0.23604	0.0257457	0.310839	-0.0220918	0.234577	-0.0275922	0.544694	-0.0400548	0.468397	-0.0502045	0.0606816	0.00798135	0.741336	0.129985	0.502455	-0.00387551
1968	D4Mit12	4	124.371	0.23604	0.0257457	0.310839	-0.0220918	0.234577	-0.0275922	0.544694	-0.0400548	0.468397	-0.0502045	0.0606816	0.00798135	0.741336	0.129985	0.502455	-0.00387551
1969	rs27553983	4	124.386	0.23604	0.0257457	0.310839	-0.0220918	0.234577	-0.0275922	0.544694	-0.0400548	0.468397	-0.0502045	0.0606816	0.00798135	0.741336	0.129985	0.502455	-0.00387551
1970	rs3677161	4	124.84	0.23604	0.0257457	0.310839	-0.0220918	0.234577	-0.0275922	0.544694	-0.0400548	0.468397	-0.0502045	0.0606816	0.00798135	0.741336	0.129985	0.502455	-0.00387551
1971	rs13474356	4	125.068	0.23604	0.0257457	0.310839	-0.0220918	0.234577	-0.0275922	0.544694	-0.0400548	0.468397	-0.0502045	0.0606816	0.00798135	0.741336	0.129985	0.502455	-0.00387551
1972	rs3704486	4	125.588	0.0301121	0.00386693	0.115759	-0.00924146	0.210345	-0.0246804	0.418783	-0.0320733	0.33875	-0.0376382	0.078173	-0.0098446	0.939624	0.0270458	0.567472	-0.00404224
1973	rs3666537	4	126.473	0.174782	0.0197026	0.0307843	0.00266307	0.0192669	-0.00269396	0.0451009	-0.004552	0.0254611	-0.00358507	0.045122	-0.0058861	0.999834	7.19243e-05	1.24429	-0.00664768
1974	rs32386196	4	126.717	0.18445	0.0196156	0.00920098	0.000776433	0.0631249	-0.0080079	0.0319961	-0.00310877	0.0627054	-0.00812844	0.141109	-0.0159717	0.99887	0.000491153	1.55655	-0.00733184
1975	rs27549414	4	126.745	0.18445	0.0196156	0.00920098	0.000776433	0.0631249	-0.0080079	0.0319961	-0.00310877	0.0627054	-0.00812844	0.141109	-0.0159717	0.99887	0.000491153	1.55655	-0.00733184
1976	rs27563623	4	127.422	0.997868	0.08079	0.0233372	0.00222249	0.20379	0.0268987	0.365862	-0.0319592	0.277036	0.0336182	0.422295	-0.045027	0.568113	0.245566	1.36808	-0.00742248
1977	rs32617066	4	127.948	0.997868	0.08079	0.0233372	0.00222249	0.20379	0.0268987	0.365862	-0.0319592	0.277036	0.0336182	0.422295	-0.045027	0.568113	0.245566	1.36808	-0.00742248
1978	rs45695794	4	128.168	0.997868	0.08079	0.0233372	0.00222249	0.20379	0.0268987	0.365862	-0.0319592	0.277036	0.0336182	0.422295	-0.045027	0.568113	0.245566	1.36808	-0.00742248
1979	rs50384736	4	128.179	0.997868	0.08079	0.0233372	0.00222249	0.20379	0.0268987	0.365862	-0.0319592	0.277036	0.0336182	0.422295	-0.045027	0.568113	0.245566	1.36808	-0.00742248
1980	rs6407866	4	128.852	0.997868	0.08079	0.0233372	0.00222249	0.20379	0.0268987	0.365862	-0.0319592	0.277036	0.0336182	0.422295	-0.045027	0.568113	0.245566	1.36808	-0.00742248
1981	UNC8210955	4	129.561	0.997868	0.08079	0.0233372	0.00222249	0.20379	0.0268987	0.365862	-0.0319592	0.277036	0.0336182	0.422295	-0.045027	0.568113	0.245566	1.36808	-0.00742248
1982	rs3023009	4	129.572	1.58637	0.105357	0.00773185	0.000734114	0.316544	0.0376227	0.146957	-0.0146127	0.862812	0.077129	0.283684	-0.0322228	0.255085	0.593314	1.38517	-0.00736473
1983	UNC8215712	4	129.933	1.58109	0.104195	0.0606185	-0.00540561	0.224348	0.0282013	0.201538	-0.0190607	0.924098	0.0801427	0.370091	-0.039487	0.216151	0.665243	1.56049	-0.00787744
1984	JAX00566336	4	130.015	0.872015	0.0712962	0.174004	-0.0140013	0.0646775	0.0092632	0.250405	-0.0227664	0.610531	0.0598342	0.629132	-0.0581036	0.447532	0.349176	1.8055	-0.0085536
1985	UNC8217501	4	130.093	0.872015	0.0712962	0.174004	-0.0140013	0.0646775	0.0092632	0.250405	-0.0227664	0.610531	0.0598342	0.629132	-0.0581036	0.447532	0.349176	1.8055	-0.0085536
1986	rs48843456	4	130.818	0.872015	0.0712962	0.174004	-0.0140013	0.0646775	0.0092632	0.250405	-0.0227664	0.610531	0.0598342	0.629132	-0.0581036	0.447532	0.349176	1.8055	-0.0085536
1987	rs31971961	4	131.999	0.70708	0.0680147	0.0529007	0.00512615	0.0301951	0.00486794	0.236254	-0.0235106	1.72771	0.126851	0.157535	0.0212785	0.340042	0.468468	0.995224	-0.00627525
1988	rs27539745	4	132.381	0.70708	0.0680147	0.0529007	0.00512615	0.0301951	0.00486794	0.236254	-0.0235106	1.72771	0.126851	0.157535	0.0212785	0.340042	0.468468	0.995224	-0.00627525
1989	rs224786516	4	132.447	0.70708	0.0680147	0.0529007	0.00512615	0.0301951	0.00486794	0.236254	-0.0235106	1.72771	0.126851	0.157535	0.0212785	0.340042	0.468468	0.995224	-0.00627525
1990	rs31846085	4	132.539	0.70708	0.0680147	0.0529007	0.00512615	0.0301951	0.00486794	0.236254	-0.0235106	1.72771	0.126851	0.157535	0.0212785	0.340042	0.468468	0.995224	-0.00627525
1991	rs50587016	4	132.62	0.528127	0.0547047	0.118155	0.0106749	0.147179	0.02117	0.0952297	-0.0105845	1.9749	0.136473	0.049287	0.00729744	0.339662	0.468954	1.22905	-0.00716403
1992	UNC040295831	4	132.626	0.528127	0.0547047	0.118155	0.0106749	0.147179	0.02117	0.0952297	-0.0105845	1.9749	0.136473	0.049287	0.00729744	0.339662	0.468954	1.22905	-0.00716403
1993	rs32415293	4	132.851	0.528127	0.0547047	0.118155	0.0106749	0.147179	0.02117	0.0952297	-0.0105845	1.9749	0.136473	0.049287	0.00729744	0.339662	0.468954	1.22905	-0.00716403
1994	rs3664871	4	132.854	0.528127	0.0547047	0.118155	0.0106749	0.147179	0.02117	0.0952297	-0.0105845	1.9749	0.136473	0.049287	0.00729744	0.339662	0.468954	1.22905	-0.00716403
1995	rs27542952	4	132.916	0.528127	0.0547047	0.118155	0.0106749	0.147179	0.02117	0.0952297	-0.0105845	1.9749	0.136473	0.049287	0.00729744	0.339662	0.468954	1.22905	-0.00716403
1996	rs32101803	4	133.325	0.528127	0.0547047	0.118155	0.0106749	0.147179	0.02117	0.0952297	-0.0105845	1.9749	0.136473	0.049287	0.00729744	0.339662	0.468954	1.22905	-0.00716403
[truncated: 5,324 more rows]
