# Supplementary material for: Genetic loci and metabolic states associated with murine epigenetic aging
Source: eLife. 2022 Apr 7;11:e75244. doi: 10.7554/eLife.75244 (PMC9049972; doi:10.7554/eLife.75244)
Supplement: Supplementary file 11. [file elife-75244-supp11.csv]

Supplementary file 11. Positional candidate genes in Eaa11 and Eaa19
												negative in B high; positive is D high
	Gene	EnsembleID	Gene_ID	Description	Chr	Mb	EAA.Log10FishersCombinedP (df = 14)	Predicted-maxLS (-Log10p)	Missense/stop	cis-eQTL	cis-eQTL LOD (interval mapping)	AdditiveEffect (interval mapping)	HumanGWAS
1	Tmem100	ENSMUST00000092788	67888	transmembrane protein 100	11	90.03	3	0	missense
2	Mmd	ENSMUST00000004050	67468	monocyte to macrophage differentiation-associated	11	90.25	3	0		yes	7.4	-0.164	age of menarche
3	Stxbp4	ENSMUST00000143203	20913	syntaxin binding protein 4	11	90.48	3	0	missense	yes	6.1	0.044	epigenetic aging, age of menarch
4	Cox11	ENSMUST00000020851	69802	cytochrome c oxidase assembly protein 11	11	90.64	5	0	missense
5	Tom1l1	ENSMUST00000107867	71943	target of myb1-like 1 (chicken)	11	90.65	5	0	missense	yes	2.7	0.054	parental longevity
6	Mbtd1	ENSMUST00000107853	103537	mbt domain containing 1	11	93.89	11	0	missense
7	Ankrd40	ENSMUST00000051221	71452	ankyrin repeat domain 40	11	94.33	11	0	missense
8	Zfp652	ENSMUST00000107717	268469	zinc finger protein 652	11	95.71	8	0		yes	8.8	-0.207
9	Abi3	ENSMUST00000059026	66610	ABI gene family, member 3	11	95.83	8	0	missense				Alzheimer's diseae
10	B4galnt2	ENSMUST00000038343	14422	beta-1,4-N-acetyl-galactosaminyl transferase 2	11	95.87	8	0		yes	2.3	-0.032
11	Calcoco2	ENSMUST00000097162	76815	calcium binding and coiled-coil domain 2	11	96.10	8	0	missense
12	Skap1	ENSMUST00000071510	78473	src family associated phosphoprotein 1	11	96.46	8	0	missense
13	Sp2	ENSMUST00000062652	78912	Sp2 transcription factor	11	96.95	7	0	missense
14	Plxdc1	ENSMUST00000017561	72324	plexin domain containing 1	11	97.92	7	0		yes	9.9	0.126
15	Cacnb1	ENSMUST00000107562	12295	calcium channel, voltage-dependent, beta 1 subunit	11	98.00	7	0		yes	2.6	-0.05
16	Stac2	ENSMUST00000017544	217154	SH3 and cysteine rich domain 2	11	98.04	7	0	missense	yes	26.7	0.191
17	Med1	ENSMUST00000092735	19014	mediator complex subunit 1	11	98.15	5	0	missense
18	Cdk12	ENSMUST00000107538	69131	cyclin-dependent kinase 12	11	98.20	5	0	missense				age of menopause
19	Erbb2	ENSMUST00000058295	13866	v-erb-b2 erythroblastic leukemia viral oncogene homolog 2, neuro/glioblastoma derived oncogene homolog (avian)	11	98.41	5	0	missense
20	Grb7	ENSMUST00000019456	14786	growth factor receptor bound protein 7	11	98.45	5	0		yes	5.3	-0.104
21	Ikzf3	ENSMUST00000103141	22780	IKAROS family zinc finger 3	11	98.46	5	0	missense
22	Ormdl3	ENSMUST00000052919	66612	ORM1-like 3 (S. cerevisiae)	11	98.58	5	0		yes	3.9	-0.079
23	Nr1d1	ENSMUST00000064941	217166	nuclear receptor subfamily 1, group D, member 1	11	98.77	5	0	missense
24	Rapgefl1	ENSMUST00000107479	268480	Rap guanine nucleotide exchange factor (GEF)-like 1	11	98.84	5	0		yes	9	0.078
25	Marchf5	ENSMUST00000024078	69104	membrane-associated ring finger (C3HC4) 5	19	37.21	4	0	missense; stop
26	Kif11	ENSMUST00000012587	16551	kinesin family member 11	19	37.38	4	0	missense
27	Cyp26c1	ENSMUST00000073391	546726	cytochrome P450, family 26, subfamily c, polypeptide 1	19	37.69	4	0	missense
28	Cyp26a1	ENSMUST00000025946	13082	cytochrome P450, family 26, subfamily a, polypeptide 1	19	37.70	4	0	missense				longevity
29	Myof	ENSMUST00000041475	226101	myoferlin	19	37.90	9	0	missense				longevity
30	Cep55	ENSMUST00000116506	74107	centrosomal protein 55	19	38.06	5	1	missense
31	Fra10ac1	ENSMUST00000067167	70567	FRA10AC1 homolog (human)	19	38.19	11	1		yes	23.3	-0.161
32	Slc35g1	ENSMUST00000054098	240660	solute carrier family 35, member G1	19	38.40	11	1		yes	9.2	-0.211
33	Plce1	ENSMUST00000182267	74055	phospholipase C, epsilon 1	19	38.52	11	1	missense	yes	5.4	-0.128
34	Noc3l	ENSMUST00000025963	57753	nucleolar complex associated 3 homolog (S. cerevisiae)	19	38.79	11	1	missense
35	Cyp2c65	ENSMUST00000087236	72303	cytochrome P450, family 2, subfamily c, polypeptide 65	19	39.06	11	1	missense
36	Cyp2c66	ENSMUST00000087234	69888	cytochrome P450, family 2, subfamily c, polypeptide 66	19	39.11	11	1		yes	31.4	0.087
37	Cyp2c29	ENSMUST00000003137	13095	cytochrome P450, family 2, subfamily c, polypeptide 29	19	39.29	11	1	missense
38	Cyp2c38	ENSMUST00000035488	13097	cytochrome P450, family 2, subfamily c, polypeptide 38	19	39.39	11	1	missense
39	Cyp2c39	ENSMUST00000025968	13098	cytochrome P450, family 2, subfamily c, polypeptide 39	19	39.51	11	1	missense	yes	76.1	1.87
40	Cyp2c67	ENSMUST00000067328	545288	cytochrome P450, family 2, subfamily c, polypeptide 67	19	39.61	11	1	missense
41	Cyp2c68	ENSMUST00000099472	433247	cytochrome P450, family 2, subfamily c, polypeptide 68	19	39.69	11	1	missense	yes	31.1	-0.419
42	Cyp2c40	ENSMUST00000160476	13099	cytochrome P450, family 2, subfamily c, polypeptide 40	19	39.77	11	1	missense
43	Cyp2c69	ENSMUST00000168838	100043108	cytochrome P450, family 2, subfamily c, polypeptide 69	19	39.84	11	1	missense	yes	12.8	-0.789
44	Cyp2c37	ENSMUST00000049178	13096	cytochrome P450, family 2. subfamily c, polypeptide 37	19	39.99	11	1	missense
45	Cyp2c50	ENSMUST00000068094	107141	cytochrome P450, family 2, subfamily c, polypeptide 50	19	40.09	11	1	missense
46	Cyp2c70	ENSMUST00000051846	226105	cytochrome P450, family 2, subfamily c, polypeptide 70	19	40.15	11	1	missense	yes	6	0.27
47	Sorbs1	ENSMUST00000165469	20411	sorbin and SH3 domain containing 1	19	40.30	11	1	missense
48	Aldh18a1	ENSMUST00000176939	56454	aldehyde dehydrogenase 18 family, member A1	19	40.55	9	2	missense
49	Tctn3	ENSMUST00000025981	67590	tectonic family member 3	19	40.60	8	2	missense
50	Ccnj	ENSMUST00000120057	240665	cyclin J	19	40.83	8	2	missense	yes	4.1	0.053	age of menopause
51	Gm340				19	41.58	8	2	missense
52	Slit1	ENSMUST00000025993	20562	slit homolog 1 (Drosophila)	19	41.60	8	2	missense
53	Rrp12	ENSMUST00000038677	107094	ribosomal RNA processing 12 homolog (S. cerevisiae)	19	41.86	8	2	missense
54	Mms19	ENSMUST00000026168	72199	MMS19 (MET18 S. cerevisiae)	19	41.94	7	2	missense
55	Ankrd2	ENSMUST00000026172	56642	ankyrin repeat domain 2 (stretch responsive muscle)	19	42.04	7	2		yes	39.7	-0.572
56	4933411K16Rik	ENSMUST00000164518	66765	RIKEN cDNA 4933411K16 gene	19	42.05	7	2	missense
57	Hoga1	ENSMUST00000172244	67432	4-hydroxy-2-oxoglutarate aldolase 1	19	42.05	7	2	stop
58	Pi4k2a	ENSMUST00000066778	84095	phosphatidylinositol 4-kinase type 2 alpha	19	42.09	7	2		yes	17	-0.139
59	Crtac1	ENSMUST00000048630	72832	cartilage acidic protein 1	19	42.28	9	1		yes	4.1	0.01
60	R3hcc1l	ENSMUST00000160107	52013	R3H domain and coiled-coil containing 1 like	19	42.52	3	3	missense
61	Loxl4	ENSMUST00000026190	67573	lysyl oxidase-like 4	19	42.59	3	3	missense	yes	13.8	-0.267
62	Pyroxd2	ENSMUST00000076505	74580	pyridine nucleotide-disulphide oxidoreductase domain 2	19	42.73	3	3	missense	yes	20.8	0.272
63	Hps1	ENSMUST00000026194	192236	Hermansky-Pudlak syndrome 1 homolog (human)	19	42.76	3	3	missense
64	Cnnm1	ENSMUST00000165311	83674	cyclin M1	19	43.44	3	3	missense	yes	22.6	-0.166
65	Got1	ENSMUST00000026196	14718	glutamic-oxaloacetic transaminase 1, soluble	19	43.50	3	3	missense
66	Nkx2-3	ENSMUST00000057178	18089	NK2 homeobox 3	19	43.61	3	3	missense				epigenetic aging
67	Slc25a28	ENSMUST00000046038	246696	solute carrier family 25, member 28	19	43.66	3	3		yes	2.2	-0.064
68	Cutc	ENSMUST00000112047	66388	cutC copper transporter homolog (E.coli)	19	43.75	3	3		yes	37.6	-0.189	epigenetic aging
69	Abcc2	ENSMUST00000026208	12780	ATP-binding cassette, sub-family C (CFTR/MRP), member 2	19	43.78	3	3	missense	yes	11.8	-0.351
70	Dnmbp	ENSMUST00000026209	71972	dynamin binding protein	19	43.85	3	3	missense
71	Cpn1	ENSMUST00000026210	93721	carboxypeptidase N, polypeptide 1	19	43.96	3	3		yes	18.2	0.176
72	Cyp2c44	ENSMUST00000026211	226143	cytochrome P450, family 2, subfamily c, polypeptide 44; (BXD Mendelian reference 19.44, high B)	19	44.01	3	3		yes	75.9	-1.379
73	Erlin1	ENSMUST00000112028	226144	ER lipid raft associated 1	19	44.03	3	3		yes	9.6	0.147
74	Chuk	ENSMUST00000119591	12675	conserved helix-loop-helix ubiquitous kinase	19	44.07	3	3	missense				age of menopause
75	Cwf19l1	ENSMUST00000026218	72502	CWF19-like 1, cell cycle control (S. pombe)	19	44.11	3	3	missense
76	Pkd2l1	ENSMUST00000042026	329064	polycystic kidney disease 2-like 1	19	44.15	3	3	missense				parental longevity
77	Scd4	ENSMUST00000058856	329065	stearoyl-coenzyme A desaturase 4	19	44.33	3	6	missense
78	Sec31b	ENSMUST00000111985	240667	Sec31 homolog B (S. cerevisiae)	19	44.52	3	6	missense
79	Hif1an	ENSMUST00000040455	319594	hypoxia-inducible factor 1, alpha subunit inhibitor	19	44.56	3	6	missense
80	Fam178a	ENSMUST00000096053	226151	family with sequence similarity 178, member A	19	44.93	3	6	missense
81	Lzts2	ENSMUST00000039016	226154	leucine zipper, putative tumor suppressor 2	19	45.02	3	6	missense
82	Pdzd7	ENSMUST00000145391	100503041	PDZ domain containing 7	19	45.03	3	6	missense
83	Hps6	ENSMUST00000099393	20170	Hermansky-Pudlak syndrome 6	19	46.00	3	6	missense
84	Ldb1	ENSMUST00000185355	16825	LIM domain binding 1	19	46.03	3	6		yes	12.99751155	-0.208
85	Pprc1	ENSMUST00000111899	226169	peroxisome proliferative activated receptor, gamma, coactivator-related 1	19	46.06	3	6	missense
86	Nolc1	ENSMUST00000165017	70769	nucleolar and coiled-body phosphoprotein 1	19	46.08	3	6	missense
87	Elovl3	ENSMUST00000043739	12686	elongation of very long chain fatty acids (FEN1/Elo2, SUR4/Elo3, yeast)-like 3	19	46.13	3	6		yes	8.429067245	0.386
88	Pitx3	ENSMUST00000026259	18742	paired-like homeodomain transcription factor 3	19	46.14	3	6		yes	7.063226157	0.057
89	Psd	ENSMUST00000041391	73728	pleckstrin and Sec7 domain containing	19	46.31	3	6		yes	11.34165708	0.112
90	Sfxn2	ENSMUST00000026011	94279	sideroflexin 2	19	46.57	1	7	missense	yes	19.42368585	0.206
91	Wbp1l	ENSMUST00000111855	226178	WW domain binding protein 1 like	19	46.62	1	7		yes	3.243205365	0.1
92	2010012O05Rik	ENSMUST00000074912	66439	RIKEN cDNA 2010012O05 gene	19	46.69	1	7	missense	yes	10.0654752	0.107
93	As3mt	ENSMUST00000003655	57344	arsenic (+3 oxidation state) methyltransferase	19	46.71	1	7	missense
94	Cnnm2	ENSMUST00000099373	94219	cyclin M2	19	46.76	1	7	missense
95	Ina	ENSMUST00000037636	226180	internexin neuronal intermediate filament protein, alpha	19	47.01	1	7	missense
96	Pcgf6	ENSMUST00000026032	71041	polycomb group ring finger 6	19	47.03	1	7		yes	9.570832559	0.103
97	Pdcd11	ENSMUST00000072141	18572	programmed cell death 11	19	47.09	1	7	missense
98	Neurl1a	ENSMUST00000111808	18011	neuralized E3 ubiquitin protein ligase 1A	19	47.18	1	7	missense
99	Obfc1	ENSMUST00000182808	108689	oligonucleotide/oligosaccharide-binding fold containing 1	19	47.51	1	7		yes	7.88765915	0.09
100	Slk	ENSMUST00000026043	20874	STE20-like kinase	19	47.58	1	7		yes	5.911601924	0.183
101	Col17a1	ENSMUST00000086923	12821	collagen, type XVII, alpha 1	19	47.65	1	7	missense	yes	7.094092454	0.033
102	Sfr1	ENSMUST00000099353	67788	SWI5 dependent recombination repair 1	19	47.73	1	7	missense	yes	33.79730104	0.202
103	Cfap43	ENSMUST00000160247	100048534	cilia and flagella associated protein 43	19	47.74	1	7	missense
104	Gsto1	ENSMUST00000026050	14873	glutathione S-transferase omega 1	19	47.85	1	7		yes	20.25176394	-0.205
105	Gsto2	ENSMUST00000056159	68214	glutathione S-transferase omega 2	19	47.87	1	7		yes	17.53157646	0.098
