# Supplementary material for: Genetic loci and metabolic states associated with murine epigenetic aging
Source: eLife. 2022 Apr 7;11:e75244. doi: 10.7554/eLife.75244 (PMC9049972; doi:10.7554/eLife.75244)
Supplement: Supplementary file 12. — (a) Top 2000 liver transcriptome-wide correlates of liver int.EAA and pan-tissue EAA. (b) Functional enrichment among gene expression correlates of pan-tissue general clock (pan-tissue EAA). (c) Functional enrichment among gene expression correlates of liver interventional clock (liver int.EAA). (d) Top 2000 liver proteome correlates of liver int.EAA and pan-tissue EAA. EAA, epigenetic age acceleration. [file elife-75244-supp12.xlsx]

## Sheet: 12a
Supplementary file 12a. Top 2000 liver transcriptome-wide correlates of liver int.EAA and pan-tissue EAA
n = 153 with both DNA methylation and liver transcriptome data
								pan-tissue EAA		liver int.EAA
Index	ID	CorrelatedEAA	Symbol	Description	LocationChr	LocationMb	Mean Expression	Pearson r (pan.EAA)	Correlation p (pan.EAA)	Pearson r (liver.int.EAA)	Correlation p (liver.int.EAA)
1	ENSMUST00000096363	pan.EAA/liver.int.EAA	Tmem28	transmembrane protein 28	X	99.821	0.549	0.441	1.21e-08	0.587	1.49e-15
2	ENSMUST00000024595	pan.EAA/liver.int.EAA	Slc22a3	solute carrier family 22 (organic cation transporter), member 3	17	12.42	1.048	0.272	0.000669	0.555	9.36e-14
3	ENSMUST00000182851	pan.EAA/liver.int.EAA	Celf2	CUGBP, Elav-like family member 2	2	6.54481	1.218	0.383	1.01e-06	0.521	5.2e-12
4	ENSMUST00000182879	pan.EAA/liver.int.EAA	Celf2	CUGBP, Elav-like family member 2	2	6.54484	1.542	0.379	1.39e-06	0.521	5.2e-12
5	ENSMUST00000182706	pan.EAA/liver.int.EAA	Celf2	CUGBP, Elav-like family member 2	2	6.54484	1.463	0.376	1.68e-06	0.517	8.09e-12
6	ENSMUST00000022992	pan.EAA/liver.int.EAA	Tbc1d31	TBC1 domain family, member 31	15	57.9122	1.335	0.405	2.02e-07	0.513	1.24e-11
7	ENSMUST00000076840	liver.int.EAA	Efna5	ephrin A5	17	62.6042	1.033			0.505
8	ENSMUST00000114927	pan.EAA/liver.int.EAA	Celf2	CUGBP, Elav-like family member 2	2	6.54563	1.488	0.34	1.67e-05	0.503	3.57e-11
9	ENSMUST00000183091	pan.EAA/liver.int.EAA	Celf2	CUGBP, Elav-like family member 2	2	6.54633	1.325	0.345	1.28e-05	0.494	8.28e-11
10	ENSMUST00000142941	pan.EAA/liver.int.EAA	Celf2	CUGBP, Elav-like family member 2	2	6.54624	1.259	0.344	1.32e-05	0.493	9.9e-11
11	ENSMUST00000183209	pan.EAA/liver.int.EAA	Celf2	CUGBP, Elav-like family member 2	2	6.54343	1.539	0.384	9.42e-07	0.492	1.04e-10
12	ENSMUST00000150624	pan.EAA/liver.int.EAA	Celf2	CUGBP, Elav-like family member 2	2	6.54624	1.261	0.343	1.39e-05	0.492	1.04e-10
13	ENSMUST00000103019	pan.EAA/liver.int.EAA	Aatk	apoptosis-associated tyrosine kinase	11	120.007	1.185	0.492	1.1e-10	0.492	1.08e-10
14	ENSMUST00000064307	pan.EAA/liver.int.EAA	Aatk	apoptosis-associated tyrosine kinase	11	120.007	1.173	0.487	1.69e-10	0.491	1.2e-10
15	ENSMUST00000103020	pan.EAA/liver.int.EAA	Aatk	apoptosis-associated tyrosine kinase	11	120.007	1.127	0.486	1.92e-10	0.49	1.27e-10
16	ENSMUST00000159692	pan.EAA/liver.int.EAA	Ermp1	endoplasmic reticulum metallopeptidase 1	19	29.6082	2.438	0.307	0.000115	0.487	1.68e-10
17	ENSMUST00000023407	liver.int.EAA	Mina	myc induced nuclear antigen	16	59.4718	2.699			0.485	2.04e-10
18	ENSMUST00000114924	pan.EAA/liver.int.EAA	Celf2	CUGBP, Elav-like family member 2	2	6.5397	1.22	0.382	1.07e-06	0.485	2.09e-10
19	ENSMUST00000170438	pan.EAA/liver.int.EAA	Celf2	CUGBP, Elav-like family member 2	2	6.5397	1.21	0.383	1.05e-06	0.484	2.24e-10
20	ENSMUST00000002176	pan.EAA/liver.int.EAA	Celf2	CUGBP, Elav-like family member 2	2	6.53969	1.307	0.38	1.24e-06	0.484	2.31e-10
21	ENSMUST00000052266	pan.EAA/liver.int.EAA	Exoc4	exocyst complex component 4	6	33.2491	2.002	0.32	5.66e-05	0.484	2.36e-10
22	ENSMUST00000160571	liver.int.EAA	Mina	myc induced nuclear antigen	16	59.4721	2.584			0.483	2.52e-10
23	ENSMUST00000054825	liver.int.EAA	Rarres1	retinoic acid receptor responder (tazarotene induced) 1	3	67.479	4.258			0.483	2.54e-10
24	ENSMUST00000100429	pan.EAA/liver.int.EAA	Celf2	CUGBP, Elav-like family member 2	2	6.5397	1.323	0.38	1.27e-06	0.483	2.64e-10
25	ENSMUST00000114934	pan.EAA/liver.int.EAA	Celf2	CUGBP, Elav-like family member 2	2	6.54187	1.581	0.379	1.35e-06	0.481	3.03e-10
26	ENSMUST00000034030	liver.int.EAA	Tmem184c	transmembrane protein 184C	8	77.596	2.196			0.48	3.38e-10
27	ENSMUST00000110851	pan.EAA/liver.int.EAA	Zfand2a	zinc finger, AN1-type domain 2A	5	139.471	2.07	0.301	0.00016	0.479	3.84e-10
28	ENSMUST00000079996	pan.EAA/liver.int.EAA	Zfand2a	zinc finger, AN1-type domain 2A	5	139.471	2.054	0.301	0.000159	0.478	3.97e-10
29	ENSMUST00000120674	liver.int.EAA	Mina	myc induced nuclear antigen	16	59.4718	2.61			0.476	5.1e-10
30	ENSMUST00000046587	pan.EAA/liver.int.EAA	Scamp5	secretory carrier membrane protein 5	9	57.4413	2.521	0.352	8.38e-06	0.475	5.59e-10
31	ENSMUST00000028332	liver.int.EAA	Dpp7	dipeptidylpeptidase 7; (BXD Mendelian reference 2.25, high D)	2	25.3523	3.534			0.475	5.77e-10
32	ENSMUST00000027991	liver.int.EAA	Rgs4	regulator of G-protein signaling 4	1	169.741	0.679			0.465	1.35e-09
33	ENSMUST00000067888	pan.EAA/liver.int.EAA	Tpk1	thiamine pyrophosphokinase	6	43.345	2.367	0.292	0.000256	0.465	1.42e-09
34	ENSMUST00000113297	pan.EAA/liver.int.EAA	Sytl4	synaptotagmin-like 4	X	133.936	0.514	0.373	2.11e-06	0.465	1.45e-09
35	ENSMUST00000179989	pan.EAA/liver.int.EAA	St6galnac4	ST6 (alpha-N-acetyl-neuraminyl-2,3-beta-galactosyl-1,3)-N-acetylgalactosaminide alpha-2,6-sialyltransferase 4	2	32.5876	1.279	0.306	0.000121	0.464	1.56e-09
36	ENSMUST00000111357	liver.int.EAA	Rgs4	regulator of G-protein signaling 4	1	169.742	0.729			0.463	1.64e-09
37	ENSMUST00000114644	pan.EAA/liver.int.EAA	Tpk1	thiamine pyrophosphokinase	6	43.3453	2.539	0.289	0.000291	0.463	1.66e-09
38	ENSMUST00000068088	liver.int.EAA	Fam19a5	family with sequence similarity 19, member A5	15	87.6252	1.155			0.462	1.82e-09
39	ENSMUST00000033608	pan.EAA/liver.int.EAA	Sytl4	synaptotagmin-like 4	X	133.936	0.507	0.373	2.07e-06	0.462	1.86e-09
40	ENSMUST00000090174	pan.EAA/liver.int.EAA	Zfyve19	zinc finger, FYVE domain containing 19	2	119.209	3.01	-0.305	0.000125	-0.462	1.92e-09
41	ENSMUST00000102818	pan.EAA/liver.int.EAA	St6galnac4	ST6 (alpha-N-acetyl-neuraminyl-2,3-beta-galactosyl-1,3)-N-acetylgalactosaminide alpha-2,6-sialyltransferase 4	2	32.5871	1.154	0.31	9.72e-05	0.459	2.33e-09
42	ENSMUST00000119307	pan.EAA/liver.int.EAA	Chchd7	coiled-coil-helix-coiled-coil-helix domain containing 7	4	3.93892	4.084	-0.253	0.00164	-0.459	2.48e-09
43	ENSMUST00000023707	pan.EAA/liver.int.EAA	Sod1	superoxide dismutase 1, soluble	16	90.2207	10.045	-0.294	0.00022	-0.456	3.08e-09
44	ENSMUST00000121651	pan.EAA/liver.int.EAA	Chchd7	coiled-coil-helix-coiled-coil-helix domain containing 7	4	3.93891	4.549	-0.254	0.00152	-0.455	3.51e-09
45	ENSMUST00000041122	pan.EAA/liver.int.EAA	Chchd7	coiled-coil-helix-coiled-coil-helix domain containing 7	4	3.93891	4.457	-0.252	0.00168	-0.454	3.82e-09
46	ENSMUST00000120732	pan.EAA/liver.int.EAA	Chchd7	coiled-coil-helix-coiled-coil-helix domain containing 7	4	3.93891	4.38	-0.252	0.0017	-0.454	3.85e-09
47	ENSMUST00000076258	pan.EAA/liver.int.EAA	Ppm1m	protein phosphatase 1M	9	106.194	2.752	0.328	3.52e-05	0.453	4.13e-09
48	ENSMUST00000194150	liver.int.EAA	Mme	membrane metallo endopeptidase	3	63.2956	2.371			0.453	4.16e-09
49	ENSMUST00000102519	pan.EAA/liver.int.EAA	Zfyve19	zinc finger, FYVE domain containing 19	2	119.209	3.324	-0.3	0.000162	-0.452	4.3e-09
50	ENSMUST00000140761	pan.EAA/liver.int.EAA	Ppm1m	protein phosphatase 1M	9	106.194	2.806	0.328	3.51e-05	0.45	5.22e-09
51	ENSMUST00000057454	pan.EAA/liver.int.EAA	Gchfr	GTP cyclohydrolase I feedback regulator	2	119.168	7.531	-0.27	0.00073	-0.45	5.36e-09
52	ENSMUST00000025249	pan.EAA/liver.int.EAA	Apom	apolipoprotein M	17	35.129	7.542	-0.371	2.3e-06	-0.448	6.23e-09
53	ENSMUST00000029400	liver.int.EAA	Mme	membrane metallo endopeptidase	3	63.2961	2.401			0.447	7.11e-09
54	ENSMUST00000120680	pan.EAA/liver.int.EAA	Tfrc	transferrin receptor	16	32.609	1.622	0.311	9e-05	0.445	8.47e-09
55	ENSMUST00000109344	pan.EAA/liver.int.EAA	Wfdc2	WAP four-disulfide core domain 2	2	164.563	3.007	0.394	4.64e-07	0.442	1.09e-08
56	ENSMUST00000067984	pan.EAA/liver.int.EAA	Mtnr1a	melatonin receptor 1A	8	45.0691	0.405	0.354	7.34e-06	0.442	1.1e-08
57	ENSMUST00000114875	pan.EAA/liver.int.EAA	Mbnl3	muscleblind-like 3 (Drosophila)	X	51.1173	0.102	0.423	5.26e-08	0.441	1.12e-08
58	ENSMUST00000116621	pan.EAA/liver.int.EAA	Ndufb11	NADH dehydrogenase (ubiquinone) 1 beta subcomplex, 11	X	20.6153	7.222	-0.264	0.000965	-0.441	1.21e-08
59	ENSMUST00000029344	pan.EAA/liver.int.EAA	Mfsd1	major facilitator superfamily domain containing 1	3	67.5827	4.872	0.262	0.00108	0.441	1.21e-08
60	ENSMUST00000108386	pan.EAA/liver.int.EAA	Chchd7	coiled-coil-helix-coiled-coil-helix domain containing 7	4	3.93889	4.538	-0.262	0.00108	-0.436	1.83e-08
61	ENSMUST00000200707	pan.EAA/liver.int.EAA	RP23-258C6.2	0	5	91.2576	0.448	0.335	2.33e-05	0.435	1.91e-08
62	ENSMUST00000023677	pan.EAA/liver.int.EAA	Atp5o	ATP synthase, H+ transporting, mitochondrial F1 complex, O subunit	16	91.9252	7.296	-0.254	0.00154	-0.435	1.92e-08
63	ENSMUST00000089559	pan.EAA/liver.int.EAA	Ddrgk1	DDRGK domain containing 1	2	130.654	6.986	-0.254	0.00154	-0.435	1.97e-08
64	ENSMUST00000030029	liver.int.EAA	Invs	inversin	4	48.2798	1.307			0.434	2.02e-08
65	ENSMUST00000115390	pan.EAA/liver.int.EAA	Ccnf	cyclin F	17	24.2232	1.713	0.3	0.000165	0.434	2.09e-08
66	ENSMUST00000023572	liver.int.EAA	Cxadr	coxsackie virus and adenovirus receptor	16	78.3015	2.819			0.433	2.19e-08
67	ENSMUST00000025891	pan.EAA/liver.int.EAA	Capn1	calpain 1	19	5.98855	3.06	0.365	3.62e-06	0.432	2.4e-08
68	ENSMUST00000031080	liver.int.EAA	Fam114a1	family with sequence similarity 114, member A1	5	64.9701	3.048			0.432	2.41e-08
69	ENSMUST00000072093	liver.int.EAA	Plxnb1	plexin B1	9	109.095	2.778			0.432	2.48e-08
70	ENSMUST00000122365	pan.EAA/liver.int.EAA	Gm28037	predicted gene, 28037	16	55.9663	8.154	-0.254	0.00153	-0.432	2.53e-08
71	ENSMUST00000164843	pan.EAA/liver.int.EAA	Capn1	calpain 1	19	5.98855	3.082	0.364	3.67e-06	0.432	2.54e-08
72	ENSMUST00000194134	liver.int.EAA	Mme	membrane metallo endopeptidase	3	63.2959	1.954			0.431	2.68e-08
73	ENSMUST00000023269	pan.EAA/liver.int.EAA	Rpl24	ribosomal protein L24	16	55.9663	8.002	-0.253	0.00157	-0.431	2.74e-08
74	ENSMUST00000160439	pan.EAA/liver.int.EAA	Zfand2b	zinc finger, AN1 type domain 2B	1	75.1686	4.57	-0.258	0.00131	-0.43	2.87e-08
75	ENSMUST00000049452	liver.int.EAA	Tmem108	transmembrane protein 108	9	103.483	0.209			0.429	3.09e-08
76	ENSMUST00000165126	liver.int.EAA	Uba52	ubiquitin A-52 residue ribosomal protein fusion product 1	8	70.5083	9.99			-0.429	3.25e-08
77	ENSMUST00000121623	liver.int.EAA	Kxd1	KxDL motif containing 1	8	70.5083	8.899			-0.428	3.37e-08
78	ENSMUST00000189588	pan.EAA/liver.int.EAA	Tmem108	transmembrane protein 108	9	103.484	0.25	0.248	0.00203	0.428	3.43e-08
79	ENSMUST00000027394	pan.EAA/liver.int.EAA	Zfand2b	zinc finger, AN1 type domain 2B	1	75.1687	4.46	-0.252	0.0017	-0.427	3.56e-08
80	ENSMUST00000189066	pan.EAA/liver.int.EAA	Tmem108	transmembrane protein 108	9	103.484	0.299	0.241	0.00272	0.427	3.58e-08
81	ENSMUST00000067218	pan.EAA/liver.int.EAA	Parp3	poly (ADP-ribose) polymerase family, member 3	9	106.47	3.598	0.34	1.72e-05	0.426	3.99e-08
82	ENSMUST00000121210	pan.EAA/liver.int.EAA	Chchd7	coiled-coil-helix-coiled-coil-helix domain containing 7	4	3.93891	4.343	-0.253	0.00157	-0.426	4.06e-08
83	ENSMUST00000109345	pan.EAA/liver.int.EAA	Wfdc2	WAP four-disulfide core domain 2	2	164.563	3.129	0.39	6.1e-07	0.426	4.08e-08
84	ENSMUST00000171024	pan.EAA/liver.int.EAA	Exd1	exonuclease 3'-5' domain containing 1	2	119.517	0.622	0.253	0.0016	0.426	4.1e-08
85	ENSMUST00000080856	liver.int.EAA	Ipo11	importin 11	13	106.794	1.842			0.425	4.23e-08
86	ENSMUST00000081940	liver.int.EAA	Uba52	ubiquitin A-52 residue ribosomal protein fusion product 1	8	70.5083	9.555			-0.425	4.36e-08
87	ENSMUST00000125184	liver.int.EAA	Uba52	ubiquitin A-52 residue ribosomal protein fusion product 1	8	70.5083	9.162			-0.425	4.41e-08
88	ENSMUST00000033811	pan.EAA/liver.int.EAA	Morc4	microrchidia 4	X	139.822	0.745	0.291	0.000268	0.424	4.6e-08
89	ENSMUST00000121110	pan.EAA/liver.int.EAA	Chchd7	coiled-coil-helix-coiled-coil-helix domain containing 7	4	3.93889	4.707	-0.247	0.00208	-0.424	4.7e-08
90	ENSMUST00000123555	pan.EAA/liver.int.EAA	Parp3	poly (ADP-ribose) polymerase family, member 3	9	106.471	3.817	0.34	1.71e-05	0.424	4.86e-08
91	ENSMUST00000186033	liver.int.EAA	Ipo11	importin 11	13	106.794	1.871			0.423	4.92e-08
92	ENSMUST00000135446	liver.int.EAA	Uba52	ubiquitin A-52 residue ribosomal protein fusion product 1	8	70.5083	9.591			-0.423	4.94e-08
93	ENSMUST00000087401	pan.EAA/liver.int.EAA	Morc4	microrchidia 4	X	139.822	0.807	0.287	0.000316	0.423	5.02e-08
94	ENSMUST00000120087	pan.EAA/liver.int.EAA	Samd9l	sterile alpha motif domain containing 9-like	6	3.37226	1.673	0.368	2.86e-06	0.423	5.03e-08
95	ENSMUST00000039925	pan.EAA/liver.int.EAA	Upb1	ureidopropionase, beta	10	75.4069	6.378	-0.284	0.000382	-0.423	5.17e-08
96	ENSMUST00000066337	pan.EAA/liver.int.EAA	Alas2	aminolevulinic acid synthase 2, erythroid	X	150.547	2.755	0.373	2.08e-06	0.423	5.23e-08
97	ENSMUST00000114732	pan.EAA/liver.int.EAA	Ephb6	Eph receptor B6	6	41.6055	0.557	0.441	1.19e-08	0.423	5.24e-08
98	ENSMUST00000140679	liver.int.EAA	Uba52	ubiquitin A-52 residue ribosomal protein fusion product 1	8	70.5083	9.2			-0.422	5.35e-08
99	ENSMUST00000129909	liver.int.EAA	Uba52	ubiquitin A-52 residue ribosomal protein fusion product 1	8	70.5083	9.184			-0.422	5.4e-08
100	ENSMUST00000112715	pan.EAA/liver.int.EAA	Alas2	aminolevulinic acid synthase 2, erythroid	X	150.547	2.843	0.372	2.13e-06	0.422	5.41e-08
101	ENSMUST00000165199	pan.EAA/liver.int.EAA	Arsa	arylsulfatase A	15	89.4725	3.008	0.309	0.000102	0.421	5.84e-08
102	ENSMUST00000029865	liver.int.EAA	Trp53inp1	transformation related protein 53 inducible nuclear protein 1	4	11.1564	3.102			0.421	5.96e-08
103	ENSMUST00000180679	pan.EAA/liver.int.EAA	Gm26816	predicted gene, 26816	8	110.863	1.339	0.242	0.00253	0.419	6.97e-08
104	ENSMUST00000130590	pan.EAA/liver.int.EAA	Lrp11	low density lipoprotein receptor-related protein 11	10	7.58998	1.028	0.324	4.44e-05	0.419	7.19e-08
105	ENSMUST00000045970	pan.EAA/liver.int.EAA	Gpc1	glypican 1	1	92.8316	2.039	0.467	1.19e-09	0.418	7.41e-08
106	ENSMUST00000039659	liver.int.EAA	Cbr1	carbonyl reductase 1	16	93.6078	6.362			-0.417	8e-08
107	ENSMUST00000019931	pan.EAA/liver.int.EAA	Lrp11	low density lipoprotein receptor-related protein 11	10	7.58982	1.016	0.323	4.74e-05	0.417	8.16e-08
108	ENSMUST00000035960	pan.EAA/liver.int.EAA	Haus8	4HAUS augmin-like complex, subunit 8	8	71.2511	1.315	0.325	4.09e-05	0.417	8.46e-08
109	ENSMUST00000060009	pan.EAA/liver.int.EAA	Exd1	exonuclease 3'-5' domain containing 1	2	119.517	0.583	0.25	0.00185	0.416	8.63e-08
110	ENSMUST00000119403	pan.EAA/liver.int.EAA	Chchd7	coiled-coil-helix-coiled-coil-helix domain containing 7	4	3.94085	3.224	-0.255	0.00144	-0.416	8.88e-08
111	ENSMUST00000159168	pan.EAA/liver.int.EAA	Umad1	UMAP1-MVP12 associated (UMA) domain containing 1	6	8.27046	3.034	0.269	0.000765	0.415	9.43e-08
112	ENSMUST00000165867	pan.EAA/liver.int.EAA	Cog4	component of oligomeric golgi complex 4	8	110.847	4.287	0.27	0.000738	0.415	9.95e-08
113	ENSMUST00000086148	pan.EAA/liver.int.EAA	Sult2a2	sulfotransferase family 2A, dehydroepiandrosterone (DHEA)-preferring, member 2	7	13.7335	7.099	-0.289	0.000298	-0.414	1.03e-07
114	ENSMUST00000017867	pan.EAA/liver.int.EAA	Wfdc2	WAP four-disulfide core domain 2	2	164.563	2.825	0.39	6.05e-07	0.414	1.06e-07
115	ENSMUST00000022867	pan.EAA/liver.int.EAA	Laptm4b	lysosomal-associated protein transmembrane 4B	15	34.238	3.441	0.25	0.00183	0.413	1.09e-07
116	ENSMUST00000151288	liver.int.EAA	Slc45a4	solute carrier family 45, member 4	15	73.5774	1.304			0.413	1.1e-07
117	ENSMUST00000066987	pan.EAA/liver.int.EAA	Galnt10	UDP-N-acetyl-alpha-D-galactosamine:polypeptide N-acetylgalactosaminyltransferase 10	11	57.6454	2.032	0.313	8.37e-05	0.413	1.13e-07
118	ENSMUST00000035532	pan.EAA/liver.int.EAA	Pik3r1	phosphatidylinositol 3-kinase, regulatory subunit, polypeptide 1 (p85 alpha)	13	101.684	3.463	0.292	0.000252	0.413	1.15e-07
119	ENSMUST00000159433	pan.EAA/liver.int.EAA	Umad1	UMAP1-MVP12 associated (UMA) domain containing 1	6	8.25943	3.027	0.27	0.00073	0.412	1.17e-07
120	ENSMUST00000112479	pan.EAA/liver.int.EAA	Parp3	poly (ADP-ribose) polymerase family, member 3	9	106.471	3.944	0.333	2.6e-05	0.411	1.36e-07
121	ENSMUST00000162034	pan.EAA/liver.int.EAA	Umad1	UMAP1-MVP12 associated (UMA) domain containing 1	6	8.25938	3.034	0.272	0.000667	0.41	1.38e-07
122	ENSMUST00000102585	pan.EAA/liver.int.EAA	Fgf11	fibroblast growth factor 11	11	69.7961	0.256	0.246	0.00218	0.41	1.38e-07
123	ENSMUST00000112121	liver.int.EAA	Mlec	malectin	5	115.143	4.068			0.41	1.41e-07
124	ENSMUST00000023486	pan.EAA/liver.int.EAA	Tfrc	transferrin receptor	16	32.6089	1.947	0.296	0.000204	0.41	1.43e-07
125	ENSMUST00000110071	pan.EAA/liver.int.EAA	Haus8	4HAUS augmin-like complex, subunit 8	8	71.2511	1.384	0.333	2.66e-05	0.41	1.45e-07
126	ENSMUST00000022311	liver.int.EAA	Oxsm	3-oxoacyl-ACP synthase, mitochondrial	14	16.2387	3.113			0.41	1.47e-07
127	ENSMUST00000054266	liver.int.EAA	Slc45a4	solute carrier family 45, member 4	15	73.5803	1.686			0.409	1.52e-07
128	ENSMUST00000056433	liver.int.EAA	Gpr107	G protein-coupled receptor 107	2	31.1523	2.313			0.409	1.53e-07
129	ENSMUST00000076224	liver.int.EAA	Slc45a4	solute carrier family 45, member 4	15	73.5803	1.781			0.408	1.61e-07
130	ENSMUST00000163821	pan.EAA/liver.int.EAA	Shtn1	shootin 1	19	58.9734	2.749	0.255	0.00147	0.408	1.64e-07
131	ENSMUST00000016530	liver.int.EAA	Mpped2	metallophosphoesterase domain containing 2	2	106.696	0.519			0.408	1.66e-07
132	ENSMUST00000027965	liver.int.EAA	Fam107b	family with sequence similarity 107, member B	2	3.71346	4.168			0.407	1.72e-07
133	ENSMUST00000159388	liver.int.EAA	Vangl1	vang-like 1 (van gogh, Drosophila)	3	102.157	1.451			0.407	1.81e-07
134	ENSMUST00000121391	pan.EAA/liver.int.EAA	Aim1l	absent in melanoma 1-like	4	134.068	1.262	0.304	0.000132	0.406	1.93e-07
135	ENSMUST00000034203	pan.EAA/liver.int.EAA	Cog4	component of oligomeric golgi complex 4	8	110.847	4.327	0.269	0.000755	0.406	1.93e-07
136	ENSMUST00000171545	liver.int.EAA	Enpp2	ectonucleotide pyrophosphatase/phosphodiesterase 2	15	54.8389	4.09			0.406	1.93e-07
137	ENSMUST00000115080	pan.EAA/liver.int.EAA	Exoc4	exocyst complex component 4	6	33.2491	1.549	0.252	0.00171	0.406	1.95e-07
138	ENSMUST00000041591	liver.int.EAA	Enpp2	ectonucleotide pyrophosphatase/phosphodiesterase 2	15	54.8389	4.216			0.406	1.99e-07
139	ENSMUST00000116594	liver.int.EAA	Sfmbt2	Scm-like with four mbt domains 2	2	10.3724	0.118			0.405	2.03e-07
140	ENSMUST00000041105	liver.int.EAA	Sfmbt2	Scm-like with four mbt domains 2	2	10.3724	0.118			0.405	2.03e-07
141	ENSMUST00000173516	liver.int.EAA	Enpp2	ectonucleotide pyrophosphatase/phosphodiesterase 2	15	54.8393	4.119			0.405	2.07e-07
142	ENSMUST00000167541	liver.int.EAA	Enpp2	ectonucleotide pyrophosphatase/phosphodiesterase 2	15	54.8394	4.152			0.405	2.09e-07
143	ENSMUST00000047511	pan.EAA/liver.int.EAA	Shtn1	shootin 1	19	58.9734	2.768	0.252	0.00165	0.405	2.11e-07
144	ENSMUST00000020504	pan.EAA/liver.int.EAA	Hint1	histidine triad nucleotide binding protein 1	11	54.8664	8.012	-0.248	0.00199	-0.405	2.15e-07
145	ENSMUST00000082104	pan.EAA/liver.int.EAA	Csmd1	CUB and Sushi multiple domains 1	8	15.8925	0.01	0.396	4.05e-07	0.404	2.19e-07
146	ENSMUST00000163394	pan.EAA/liver.int.EAA	Pnldc1	poly(A)-specific ribonuclease (PARN)-like domain containing 1	17	12.8889	0.684	0.352	7.95e-06	0.404	2.21e-07
147	ENSMUST00000120667	liver.int.EAA	Mina	myc induced nuclear antigen	16	59.4718	1.334			0.404	2.23e-07
148	ENSMUST00000000129	pan.EAA/liver.int.EAA	Fer	fer (fms/fps related) protein kinase	17	63.896	1.538	0.291	0.000257	0.404	2.27e-07
149	ENSMUST00000174230	pan.EAA/liver.int.EAA	Rpp40	ribonuclease P 40 subunit	13	35.8967	2.129	-0.266	0.000882	-0.403	2.34e-07
150	ENSMUST00000087234	liver.int.EAA	Cyp2c66	cytochrome P450, family 2, subfamily c, polypeptide 66	19	39.1139	0.08			-0.403	2.41e-07
151	ENSMUST00000019913	liver.int.EAA	Frk	fyn-related kinase	10	34.4834	0.814			0.403	2.49e-07
152	ENSMUST00000117710	pan.EAA/liver.int.EAA	Hint1	histidine triad nucleotide binding protein 1	11	54.8665	7.996	-0.246	0.00221	-0.402	2.51e-07
153	ENSMUST00000046890	liver.int.EAA	Rassf7	Ras association (RalGDS/AF-6) domain family (N-terminal) member 7	7	141.216	3.804			-0.402	2.57e-07
154	ENSMUST00000144826	pan.EAA/liver.int.EAA	Ccrn4l	CCR4 carbon catabolite repression 4-like (S. cerevisiae)	3	51.2402	3.136	0.249	0.00195	0.402	2.67e-07
155	ENSMUST00000170771	liver.int.EAA	Frk	fyn-related kinase	10	34.4834	0.81			0.401	2.72e-07
156	ENSMUST00000114261	liver.int.EAA	BC029214	cDNA sequence BC029214	2	25.4595	3.854			-0.4	3e-07
157	ENSMUST00000054418	liver.int.EAA	Rtn4ip1	reticulon 4 interacting protein 1	10	43.9018	2.751			0.4	3.08e-07
158	ENSMUST00000027322	liver.int.EAA	Rhbdd1	rhomboid domain containing 1	1	82.3165	2.462			0.399	3.15e-07
159	ENSMUST00000063042	liver.int.EAA	Glb1	galactosidase, beta 1	9	114.401	2.405			0.399	3.17e-07
160	ENSMUST00000033866	liver.int.EAA	Vps36	vacuolar protein sorting 36 (yeast)	8	22.1928	3.066			0.399	3.17e-07
161	ENSMUST00000143514	liver.int.EAA	Arfip1	ADP-ribosylation factor interacting protein 1	3	84.4977	2.519			0.399	3.2e-07
162	ENSMUST00000140020	liver.int.EAA	Rhbdd1	rhomboid domain containing 1	1	82.339	2.44			0.399	3.22e-07
163	ENSMUST00000184404	pan.EAA/liver.int.EAA	Ism1	isthmin 1 homolog (zebrafish)	2	139.678	0.133	0.293	0.000234	0.399	3.24e-07
164	ENSMUST00000090945	pan.EAA/liver.int.EAA	Syt11	synaptotagmin XI	3	88.7447	0.679	0.346	1.16e-05	0.399	3.3e-07
165	ENSMUST00000099307	pan.EAA/liver.int.EAA	Ism1	isthmin 1 homolog (zebrafish)	2	139.678	0.134	0.295	0.000217	0.399	3.3e-07
166	ENSMUST00000107505	pan.EAA/liver.int.EAA	Syt11	synaptotagmin XI	3	88.7447	0.64	0.346	1.18e-05	0.398	3.59e-07
167	ENSMUST00000078800	liver.int.EAA	Nfya	nuclear transcription factor-Y alpha	17	48.3869	1.777			0.397	3.77e-07
168	ENSMUST00000029453	liver.int.EAA	Vangl1	vang-like 1 (van gogh, Drosophila)	3	102.154	0.983			0.397	3.78e-07
169	ENSMUST00000046719	liver.int.EAA	Nfya	nuclear transcription factor-Y alpha	17	48.3869	1.779			0.397	3.79e-07
170	ENSMUST00000057486	liver.int.EAA	Ankrd46	ankyrin repeat domain 46	15	36.4777	4.131			0.397	3.79e-07
171	ENSMUST00000101663	liver.int.EAA	Mdfic	MyoD family inhibitor domain containing	6	15.7207	3.034			0.396	3.93e-07
172	ENSMUST00000190255	liver.int.EAA	Mdfic	MyoD family inhibitor domain containing	6	15.7207	3.034			0.396	3.93e-07
173	ENSMUST00000189359	liver.int.EAA	Mdfic	MyoD family inhibitor domain containing	6	15.7207	3.033			0.396	3.99e-07
174	ENSMUST00000011285	pan.EAA/liver.int.EAA	Fgf11	fibroblast growth factor 11	11	69.7961	0.275	0.249	0.0019	0.396	4.01e-07
175	ENSMUST00000162460	liver.int.EAA	Nfya	nuclear transcription factor-Y alpha	17	48.3869	1.754			0.396	4.01e-07
176	ENSMUST00000023600	liver.int.EAA	Robo1	roundabout homolog 1 (Drosophila)	16	72.6631	0.756			0.396	4.08e-07
177	ENSMUST00000030643	liver.int.EAA	Extl1	exostoses (multiple)-like 1	4	134.356	2.301			0.396	4.09e-07
178	ENSMUST00000136218	pan.EAA/liver.int.EAA	C230037L18Rik	RIKEN cDNA C230037L18 gene	15	89.4762	0.682	0.348	1.04e-05	0.395	4.31e-07
179	ENSMUST00000115850	liver.int.EAA	Cdh2	cadherin 2	18	16.589	4.399			0.395	4.34e-07
180	ENSMUST00000163242	liver.int.EAA	Atxn10	ataxin 10	15	85.3364	4.09			0.394	4.53e-07
181	ENSMUST00000035908	pan.EAA/liver.int.EAA	Egr3	early growth response 3	14	70.0774	0.155	0.389	6.88e-07	0.394	4.8e-07
182	ENSMUST00000068996	pan.EAA/liver.int.EAA	9430038I01Rik	RIKEN cDNA 9430038I01 gene	7	137.376	3.231	-0.254	0.00151	-0.394	4.8e-07
183	ENSMUST00000178310	liver.int.EAA	Fau	Finkel-Biskis-Reilly murine sarcoma virus (FBR-MuSV) ubiquitously expressed (fox derived)	19	6.05789	9.127			-0.393	5e-07
184	ENSMUST00000025166	liver.int.EAA	Cdh2	cadherin 2	18	16.5889	4.182			0.393	5.05e-07
185	ENSMUST00000043074	liver.int.EAA	Fau	Finkel-Biskis-Reilly murine sarcoma virus (FBR-MuSV) ubiquitously expressed (fox derived)	19	6.05789	9.12			-0.393	5.07e-07
186	ENSMUST00000070872	liver.int.EAA	Slc16a6	solute carrier family 16 (monocarboxylic acid transporters), member 6	11	109.453	1.577			0.392	5.41e-07
187	ENSMUST00000106567	liver.int.EAA	Prmt6	protein arginine N-methyltransferase 6	3	110.249	2.087			0.392	5.42e-07
188	ENSMUST00000035043	liver.int.EAA	Armc8	armadillo repeat containing 8	9	99.4784	1.83			0.392	5.44e-07
189	ENSMUST00000024930	pan.EAA/liver.int.EAA	1600002H07Rik	RIKEN cDNA 1600002H07 gene	17	24.2151	3.768	0.335	2.26e-05	0.392	5.55e-07
190	ENSMUST00000090381	pan.EAA/liver.int.EAA	Exoc4	exocyst complex component 4	6	33.2491	1.432	0.245	0.00229	0.392	5.55e-07
191	ENSMUST00000027488	pan.EAA/liver.int.EAA	Capn10	calpain 10	1	92.9344	3.71	-0.247	0.00213	-0.392	5.56e-07
192	ENSMUST00000179142	liver.int.EAA	Fau	Finkel-Biskis-Reilly murine sarcoma virus (FBR-MuSV) ubiquitously expressed (fox derived)	19	6.05797	8.768			-0.392	5.57e-07
193	ENSMUST00000171649	pan.EAA/liver.int.EAA	Bscl2	Berardinelli-Seip congenital lipodystrophy 2 homolog (seipin)	19	8.83747	4.544	0.266	0.000904	0.392	5.59e-07
194	ENSMUST00000110708	liver.int.EAA	Srp54b	signal recognition particle 54B	12	55.1551	2.758			0.391	5.98e-07
195	ENSMUST00000202474	pan.EAA/liver.int.EAA	Tcf4	transcription factor 4	18	69.6124	2.211	0.298	0.000186	0.39	6.04e-07
196	ENSMUST00000102898	pan.EAA/liver.int.EAA	Rpl7a	ribosomal protein L7A	2	26.9108	8.262	-0.271	0.000715	-0.39	6.08e-07
197	ENSMUST00000153348	liver.int.EAA	Susd4	sushi domain containing 4	1	182.764	0.716			0.39	6.08e-07
198	ENSMUST00000048774	liver.int.EAA	Copg2	coatomer protein complex, subunit gamma 2	6	30.7476	2.843			0.39	6.12e-07
199	ENSMUST00000168566	pan.EAA/liver.int.EAA	Zmat3	zinc finger matrin type 3	3	32.3348	0.898	0.245	0.00223	0.39	6.16e-07
200	ENSMUST00000029199	pan.EAA/liver.int.EAA	Zmat3	zinc finger matrin type 3	3	32.3348	0.889	0.244	0.00232	0.39	6.28e-07
201	ENSMUST00000159634	pan.EAA/liver.int.EAA	Bscl2	Berardinelli-Seip congenital lipodystrophy 2 homolog (seipin)	19	8.83773	4.742	0.265	0.000948	0.39	6.44e-07
202	ENSMUST00000034346	pan.EAA/liver.int.EAA	Ces2a	carboxylesterase 2A	8	104.734	6.217	-0.369	2.77e-06	-0.389	6.54e-07
203	ENSMUST00000028010	pan.EAA/liver.int.EAA	Fmo3	flavin containing monooxygenase 3	1	162.954	5.432	-0.33	3.14e-05	-0.389	6.69e-07
204	ENSMUST00000168312	liver.int.EAA	Vangl1	vang-like 1 (van gogh, Drosophila)	3	102.158	1.493			0.389	6.82e-07
205	ENSMUST00000164182	pan.EAA/liver.int.EAA	Ces2a	carboxylesterase 2A	8	104.734	6.288	-0.368	2.81e-06	-0.389	6.87e-07
206	ENSMUST00000085724	liver.int.EAA	Susd4	sushi domain containing 4	1	182.765	0.75			0.388	7.18e-07
207	ENSMUST00000020165	pan.EAA/liver.int.EAA	Pde7b	phosphodiesterase 7B	10	20.398	1.495	0.249	0.00189	0.388	7.21e-07
208	ENSMUST00000194102	pan.EAA/liver.int.EAA	Fcrl5	Fc receptor-like 5	3	87.4358	0.211	0.307	0.000115	0.388	7.26e-07
209	ENSMUST00000027997	pan.EAA/liver.int.EAA	Rgs5	regulator of G-protein signaling 5	1	169.655	3.196	0.24	0.00285	0.388	7.27e-07
210	ENSMUST00000164220	liver.int.EAA	Mis12	MIS12 homolog (yeast)	11	71.0196	2.161			0.388	7.36e-07
211	ENSMUST00000035276	pan.EAA/liver.int.EAA	Dctpp1	dCTP pyrophosphatase 1	7	127.257	5.252	-0.246	0.00216	-0.388	7.44e-07
212	ENSMUST00000034827	liver.int.EAA	Imp3	IMP3, U3 small nucleolar ribonucleoprotein, homolog (yeast)	9	56.9375	5.263			-0.387	7.66e-07
213	ENSMUST00000202477	pan.EAA/liver.int.EAA	Tcf4	transcription factor 4	18	69.5213	2.211	0.291	0.000257	0.387	7.8e-07
214	ENSMUST00000025831	liver.int.EAA	Dock8	dedicator of cytokinesis 8	19	24.9995	1.994			0.387	7.86e-07
215	ENSMUST00000120977	liver.int.EAA	Wwtr1	WW domain containing transcription regulator 1	3	57.4558	2.253			0.387	7.86e-07
216	ENSMUST00000165306	liver.int.EAA	Gpank1	G patch domain and ankyrin repeats 1	17	35.1215	2.62			-0.387	7.9e-07
217	ENSMUST00000202057	pan.EAA/liver.int.EAA	Tcf4	transcription factor 4	18	69.5219	2.237	0.293	0.000235	0.387	7.96e-07
218	ENSMUST00000192568	liver.int.EAA	Gm37885	predicted gene, 37885	1	182.484	2.006			0.386	8.25e-07
219	ENSMUST00000029380	liver.int.EAA	Wwtr1	WW domain containing transcription regulator 1	3	57.4556	2.238			0.386	8.25e-07
220	ENSMUST00000105492	liver.int.EAA	Rtn4ip1	reticulon 4 interacting protein 1	10	43.921	2.856			0.386	8.47e-07
221	ENSMUST00000052060	liver.int.EAA	Masp2	mannan-binding lectin serine peptidase 2	4	148.603	5.842			0.386	8.47e-07
222	ENSMUST00000021929	liver.int.EAA	Habp4	hyaluronic acid binding protein 4	13	64.1619	4.393			0.386	8.51e-07
223	ENSMUST00000201205	pan.EAA/liver.int.EAA	Tcf4	transcription factor 4	18	69.5195	2.075	0.296	0.000208	0.386	8.52e-07
224	ENSMUST00000102693	liver.int.EAA	Pemt	phosphatidylethanolamine N-methyltransferase	11	59.9706	8.408			-0.386	8.59e-07
225	ENSMUST00000000310	liver.int.EAA	Pemt	phosphatidylethanolamine N-methyltransferase	11	59.9706	8.42			-0.386	8.59e-07
226	ENSMUST00000102692	liver.int.EAA	Pemt	phosphatidylethanolamine N-methyltransferase	11	59.9706	8.346			-0.386	8.6e-07
227	ENSMUST00000074085	liver.int.EAA	Rpl10	ribosomal protein L10	X	74.2709	9.012			-0.385	8.7e-07
228	ENSMUST00000055518	pan.EAA/liver.int.EAA	Pik3r1	phosphatidylinositol 3-kinase, regulatory subunit, polypeptide 1 (p85 alpha)	13	101.681	3.379	0.255	0.00146	0.385	8.72e-07
229	ENSMUST00000202116	pan.EAA/liver.int.EAA	Tcf4	transcription factor 4	18	69.3457	1.947	0.303	0.000142	0.385	8.9e-07
230	ENSMUST00000078839	liver.int.EAA	Efna5	ephrin A5	17	62.6073	1.101			0.385	8.94e-07
231	ENSMUST00000099996	liver.int.EAA	Ttc30b	tetratricopeptide repeat domain 30B	2	75.9358	1.492			0.385	9.12e-07
232	ENSMUST00000042972	pan.EAA/liver.int.EAA	Rilp	Rab interacting lysosomal protein	11	75.5101	3.994	-0.242	0.00253	-0.385	9.23e-07
233	ENSMUST00000008826	liver.int.EAA	Rpl10	ribosomal protein L10	X	74.2708	9.103			-0.385	9.24e-07
234	ENSMUST00000025052	liver.int.EAA	Rps10	ribosomal protein S10	17	27.6304	8.151			-0.384	9.27e-07
235	ENSMUST00000182172	pan.EAA/liver.int.EAA	Ccdc166	coiled-coil domain containing 166	15	75.9799	1.221	-0.249	0.00194	-0.384	9.31e-07
236	ENSMUST00000046522	pan.EAA/liver.int.EAA	Btnl9	butyrophilin-like 9	11	49.1656	0.932	0.295	0.000215	0.384	9.4e-07
237	ENSMUST00000178774	liver.int.EAA	Rps10	ribosomal protein S10	17	27.6305	8.227			-0.384	9.49e-07
238	ENSMUST00000114978	pan.EAA/liver.int.EAA	Tcf4	transcription factor 4	18	69.593	2.087	0.31	9.73e-05	0.384	9.52e-07
239	ENSMUST00000000326	pan.EAA/liver.int.EAA	Bcl6b	B cell CLL/lymphoma 6, member B	11	70.2241	0.592	0.292	0.000253	0.384	9.62e-07
240	ENSMUST00000026297	liver.int.EAA	Gnl3l	guanine nucleotide binding protein-like 3 (nucleolar)-like	X	150.983	2.059			0.384	9.75e-07
241	ENSMUST00000114881	liver.int.EAA	Rps10	ribosomal protein S10	17	27.6304	7.959			-0.384	9.78e-07
242	ENSMUST00000112691	liver.int.EAA	Gnl3l	guanine nucleotide binding protein-like 3 (nucleolar)-like	X	150.983	2.058			0.384	9.81e-07
243	ENSMUST00000180505	pan.EAA/liver.int.EAA	Gm10814	predicted gene 10814	19	6.01262	0.862	0.301	0.000158	0.384	9.82e-07
244	ENSMUST00000066717	pan.EAA/liver.int.EAA	Tcf4	transcription factor 4	18	69.3441	1.795	0.312	8.67e-05	0.384	9.84e-07
245	ENSMUST00000201781	pan.EAA/liver.int.EAA	Tcf4	transcription factor 4	18	69.3445	2.004	0.306	0.000117	0.384	9.85e-07
246	ENSMUST00000030192	liver.int.EAA	Hint2	histidine triad nucleotide binding protein 2	4	43.6542	6.845			-0.384	9.88e-07
247	ENSMUST00000160556	pan.EAA/liver.int.EAA	Bscl2	Berardinelli-Seip congenital lipodystrophy 2 homolog (seipin)	19	8.83933	4.642	0.257	0.00132	0.384	9.9e-07
248	ENSMUST00000201094	pan.EAA/liver.int.EAA	Tcf4	transcription factor 4	18	69.5007	2.118	0.294	0.000229	0.383	9.98e-07
249	ENSMUST00000114882	liver.int.EAA	Rps10	ribosomal protein S10	17	27.6304	7.934			-0.383	1e-06
250	ENSMUST00000041495	pan.EAA/liver.int.EAA	Mbnl3	muscleblind-like 3 (Drosophila)	X	51.1201	0.118	0.395	4.23e-07	0.383	1.03e-06
251	ENSMUST00000202937	pan.EAA/liver.int.EAA	Tcf4	transcription factor 4	18	69.5198	2.178	0.294	0.00022	0.383	1.03e-06
252	ENSMUST00000097325	pan.EAA/liver.int.EAA	Olfr111	olfactory receptor 111	17	37.53	0.007	0.265	0.000937	0.383	1.03e-06
253	ENSMUST00000178261	pan.EAA/liver.int.EAA	Fcrl5	Fc receptor-like 5	3	87.4359	0.229	0.301	0.000158	0.383	1.06e-06
254	ENSMUST00000202674	pan.EAA/liver.int.EAA	Tcf4	transcription factor 4	18	69.3445	2.013	0.29	0.000272	0.382	1.08e-06
255	ENSMUST00000202610	pan.EAA/liver.int.EAA	Tcf4	transcription factor 4	18	69.3473	2.258	0.288	0.000314	0.382	1.1e-06
256	ENSMUST00000119922	liver.int.EAA	Vkorc1	vitamin K epoxide reductase complex, subunit 1	7	127.893	8.292			-0.382	1.1e-06
257	ENSMUST00000095062	liver.int.EAA	Lmbrd1	LMBR1 domain containing 1	1	24.6789	3.413			0.382	1.11e-06
258	ENSMUST00000201410	pan.EAA/liver.int.EAA	Tcf4	transcription factor 4	18	69.5198	2.231	0.291	0.00027	0.382	1.12e-06
259	ENSMUST00000056907	liver.int.EAA	Smcr8	Smith-Magenis syndrome chromosome region, candidate 8 homolog (human)	11	60.7775	2.154			0.382	1.13e-06
260	ENSMUST00000049926	pan.EAA/liver.int.EAA	Fcrl5	Fc receptor-like 5	3	87.4359	0.23	0.302	0.000145	0.382	1.14e-06
261	ENSMUST00000159063	liver.int.EAA	Nfya	nuclear transcription factor-Y alpha	17	48.389	2.14			0.381	1.15e-06
262	ENSMUST00000193229	pan.EAA/liver.int.EAA	Fcrl5	Fc receptor-like 5	3	87.4358	0.172	0.295	0.000213	0.381	1.2e-06
263	ENSMUST00000039557	pan.EAA/liver.int.EAA	Arhgap18	Rho GTPase activating protein 18	10	26.7725	1.759	0.243	0.00246	0.381	1.2e-06
264	ENSMUST00000114980	pan.EAA/liver.int.EAA	Tcf4	transcription factor 4	18	69.3464	2.184	0.285	0.000349	0.381	1.22e-06
265	ENSMUST00000111803	liver.int.EAA	Recql	RecQ protein-like	6	142.361	1.355			0.38	1.23e-06
266	ENSMUST00000202354	pan.EAA/liver.int.EAA	Tcf4	transcription factor 4	18	69.3458	2.194	0.285	0.000362	0.38	1.25e-06
267	ENSMUST00000126510	pan.EAA/liver.int.EAA	Tmem80	transmembrane protein 80	7	141.328	1.968	0.279	0.000483	0.38	1.25e-06
268	ENSMUST00000033074	liver.int.EAA	Vkorc1	vitamin K epoxide reductase complex, subunit 1	7	127.893	7.709			-0.38	1.25e-06
269	ENSMUST00000202772	pan.EAA/liver.int.EAA	Tcf4	transcription factor 4	18	69.3458	2.176	0.288	0.000303	0.38	1.26e-06
270	ENSMUST00000108846	pan.EAA/liver.int.EAA	Galnt10	UDP-N-acetyl-alpha-D-galactosamine:polypeptide N-acetylgalactosaminyltransferase 10	11	57.6455	1.321	0.265	0.000942	0.38	1.27e-06
271	ENSMUST00000086058	pan.EAA/liver.int.EAA	Bscl2	Berardinelli-Seip congenital lipodystrophy 2 homolog (seipin)	19	8.84052	4.983	0.254	0.00152	0.38	1.27e-06
272	ENSMUST00000052167	liver.int.EAA	Gpank1	G patch domain and ankyrin repeats 1	17	35.123	2.74			-0.38	1.29e-06
273	ENSMUST00000186049	liver.int.EAA	Armc8	armadillo repeat containing 8	9	99.5188	1.31			0.38	1.3e-06
274	ENSMUST00000068505	liver.int.EAA	Capn2	calpain 2	1	182.467	3.709			0.379	1.32e-06
275	ENSMUST00000185524	liver.int.EAA	Armc8	armadillo repeat containing 8	9	99.5188	1.305			0.379	1.33e-06
276	ENSMUST00000134108	pan.EAA/liver.int.EAA	Narfl	nuclear prelamin A recognition factor-like	17	25.7738	3.466	-0.271	0.000689	-0.379	1.34e-06
277	ENSMUST00000029402	liver.int.EAA	Slc33a1	solute carrier family 33 (acetyl-CoA transporter), member 1	3	63.9423	4.015			0.379	1.34e-06
278	ENSMUST00000023555	liver.int.EAA	Hspbap1	Hspb associated protein 1	16	35.7704	0.469			0.379	1.34e-06
279	ENSMUST00000159899	liver.int.EAA	Pigk	phosphatidylinositol glycan anchor biosynthesis, class K	3	152.714	2.855			0.379	1.38e-06
280	ENSMUST00000003759	pan.EAA/liver.int.EAA	Ciao1	cytosolic iron-sulfur protein assembly 1	2	127.241	3.288	-0.245	0.00224	-0.378	1.43e-06
281	ENSMUST00000050374	pan.EAA/liver.int.EAA	Fam83a	family with sequence similarity 83, member A	15	57.9859	0.538	0.346	1.2e-05	0.378	1.44e-06
282	ENSMUST00000201631	pan.EAA/liver.int.EAA	Tcf4	transcription factor 4	18	69.3483	2.058	0.299	0.000173	0.378	1.47e-06
283	ENSMUST00000004497	pan.EAA/liver.int.EAA	Large	like-glycosyltransferase	8	72.8146	1.243	0.271	0.00069	0.377	1.51e-06
284	ENSMUST00000034405	liver.int.EAA	Mre11a	meiotic recombination 11 homolog A (S. cerevisiae)	9	14.7847	1.025			0.377	1.52e-06
285	ENSMUST00000163963	liver.int.EAA	Fam3c	family with sequence similarity 3, member C	6	22.3079	3.638			0.377	1.54e-06
286	ENSMUST00000202435	pan.EAA/liver.int.EAA	Tcf4	transcription factor 4	18	69.3485	2.164	0.298	0.000186	0.377	1.55e-06
287	ENSMUST00000119826	pan.EAA/liver.int.EAA	Large	like-glycosyltransferase	8	72.8146	1.193	0.263	0.00103	0.377	1.55e-06
288	ENSMUST00000081288	liver.int.EAA	Fam3c	family with sequence similarity 3, member C	6	22.3079	3.731			0.377	1.55e-06
289	ENSMUST00000115052	liver.int.EAA	Fam107b	family with sequence similarity 107, member B	2	3.61376	4.036			0.377	1.6e-06
290	ENSMUST00000107687	liver.int.EAA	Arfip1	ADP-ribosylation factor interacting protein 1	3	84.4972	2.594			0.376	1.63e-06
291	ENSMUST00000162409	liver.int.EAA	Fnbp1l	formin binding protein 1-like	3	122.539	1.62			0.376	1.65e-06
292	ENSMUST00000160319	liver.int.EAA	Nfya	nuclear transcription factor-Y alpha	17	48.3891	2.018			0.376	1.71e-06
293	ENSMUST00000122219	pan.EAA/liver.int.EAA	Klra17	killer cell lectin-like receptor, subfamily A, member 17	6	129.831	0.142	0.339	1.8e-05	0.375	1.78e-06
294	ENSMUST00000027741	liver.int.EAA	Xpr1	xenotropic and polytropic retrovirus receptor 1	1	155.276	2.237			0.375	1.79e-06
295	ENSMUST00000067918	pan.EAA/liver.int.EAA	Ppm1h	protein phosphatase 1H (PP2C domain containing)	10	122.679	0.815	0.374	1.85e-06	0.375	1.8e-06
296	ENSMUST00000202458	pan.EAA/liver.int.EAA	Tcf4	transcription factor 4	18	69.4159	2.059	0.299	0.000171	0.375	1.81e-06
297	ENSMUST00000106215	liver.int.EAA	Actg1	actin, gamma, cytoplasmic 1	11	120.346	6.373			0.375	1.85e-06
298	ENSMUST00000114982	pan.EAA/liver.int.EAA	Tcf4	transcription factor 4	18	69.3457	1.996	0.31	9.54e-05	0.374	1.87e-06
299	ENSMUST00000071555	liver.int.EAA	Actg1	actin, gamma, cytoplasmic 1	11	120.346	6.28			0.374	1.88e-06
300	ENSMUST00000126610	liver.int.EAA	Rpl12	ribosomal protein L12	2	32.9616	6.861			-0.374	1.89e-06
301	ENSMUST00000047714	liver.int.EAA	Kdm5b	lysine (K)-specific demethylase 5B	1	134.56	1.433			0.374	1.92e-06
302	ENSMUST00000197569	liver.int.EAA	RP23-327M1.1	0	3	110.25	1.484			0.374	1.92e-06
303	ENSMUST00000162564	pan.EAA/liver.int.EAA	Umad1	UMAP1-MVP12 associated (UMA) domain containing 1	6	8.25945	1.549	0.283	0.000392	0.374	1.95e-06
304	ENSMUST00000062147	liver.int.EAA	Actg1	actin, gamma, cytoplasmic 1	11	120.346	6.356			0.374	1.96e-06
305	ENSMUST00000098312	liver.int.EAA	Exoc8	exocyst complex component 8	8	124.89	1.628			0.374	1.97e-06
306	ENSMUST00000081946	liver.int.EAA	Timm50	translocase of inner mitochondrial membrane 50	7	28.3055	4.462			-0.373	2.02e-06
307	ENSMUST00000070152	liver.int.EAA	Slc16a6	solute carrier family 16 (monocarboxylic acid transporters), member 6	11	109.451	1.436			0.373	2.03e-06
308	ENSMUST00000109601	liver.int.EAA	Rab1	RAB1, member RAS oncogene family	11	20.2014	6.034			0.373	2.05e-06
309	ENSMUST00000114977	pan.EAA/liver.int.EAA	Tcf4	transcription factor 4	18	69.5934	2.114	0.308	0.000105	0.373	2.07e-06
310	ENSMUST00000118315	liver.int.EAA	Rsph4a	radial spoke head 4 homolog A (Chlamydomonas)	10	33.9055	0.58			0.373	2.09e-06
311	ENSMUST00000166297	pan.EAA/liver.int.EAA	Fcrl5	Fc receptor-like 5	3	87.4359	0.232	0.296	0.000208	0.373	2.11e-06
312	ENSMUST00000092298	liver.int.EAA	Zfp750	zinc finger protein 750	11	121.511	1.717			0.372	2.13e-06
313	ENSMUST00000165576	liver.int.EAA	Fam3c	family with sequence similarity 3, member C	6	22.3065	3.215			0.372	2.17e-06
314	ENSMUST00000109602	liver.int.EAA	Rab1	RAB1, member RAS oncogene family	11	20.2014	5.384			0.372	2.18e-06
315	ENSMUST00000070064	pan.EAA/liver.int.EAA	Pgm3	phosphoglucomutase 3	9	86.5544	2.346	0.251	0.00177	0.372	2.19e-06
316	ENSMUST00000026839	liver.int.EAA	Prps2	phosphoribosyl pyrophosphate synthetase 2	X	167.346	2.146			0.372	2.21e-06
317	ENSMUST00000022038	liver.int.EAA	Naa35	N(alpha)-acetyltransferase 35, NatC auxiliary subunit	13	59.5853	2.951			0.372	2.22e-06
318	ENSMUST00000014687	pan.EAA/liver.int.EAA	Klra17	killer cell lectin-like receptor, subfamily A, member 17	6	129.831	0.14	0.339	1.78e-05	0.372	2.23e-06
319	ENSMUST00000197315	pan.EAA/liver.int.EAA	Tlr1	toll-like receptor 1	5	64.9247	0.358	0.293	0.000236	0.371	2.32e-06
320	ENSMUST00000024931	pan.EAA/liver.int.EAA	Tbc1d24	TBC1 domain family, member 24	17	24.2038	1.35	0.288	0.000306	0.371	2.32e-06
321	ENSMUST00000019977	pan.EAA/liver.int.EAA	Ddo	D-aspartate oxidase	10	40.63	2.508	0.243	0.00252	0.371	2.33e-06
322	ENSMUST00000114876	pan.EAA/liver.int.EAA	Mbnl3	muscleblind-like 3 (Drosophila)	X	51.1201	0.108	0.388	7.12e-07	0.371	2.36e-06
323	ENSMUST00000023849	pan.EAA/liver.int.EAA	Ccrn4l	CCR4 carbon catabolite repression 4-like (S. cerevisiae)	3	51.2244	4.294	0.244	0.00239	0.371	2.36e-06
324	ENSMUST00000167780	pan.EAA/liver.int.EAA	Ccrn4l	CCR4 carbon catabolite repression 4-like (S. cerevisiae)	3	51.2245	4.324	0.244	0.00239	0.371	2.36e-06
325	ENSMUST00000020358	liver.int.EAA	Rab1	RAB1, member RAS oncogene family	11	20.2014	5.338			0.371	2.36e-06
326	ENSMUST00000114923	liver.int.EAA	Celf2	CUGBP, Elav-like family member 2	2	6.664	1.154			0.371	2.37e-06
327	ENSMUST00000160883	liver.int.EAA	Slc33a1	solute carrier family 33 (acetyl-CoA transporter), member 1	3	63.9424	4.302			0.371	2.41e-06
328	ENSMUST00000190378	liver.int.EAA	Prmt6	protein arginine N-methyltransferase 6	3	110.246	1.897			0.371	2.42e-06
329	ENSMUST00000152809	liver.int.EAA	Rgs5	regulator of G-protein signaling 5	1	169.656	2.157			0.37	2.43e-06
330	ENSMUST00000060989	liver.int.EAA	Sorl1	sortilin-related receptor, LDLR class A repeats-containing	9	41.9647	1.191			0.37	2.43e-06
331	ENSMUST00000059349	pan.EAA/liver.int.EAA	Tlr1	toll-like receptor 1	5	64.9247	0.371	0.294	0.000231	0.37	2.46e-06
332	ENSMUST00000059787	liver.int.EAA	Dsg2	desmoglein 2	18	20.5581	3.923			0.37	2.46e-06
333	ENSMUST00000169670	liver.int.EAA	Rsph4a	radial spoke head 4 homolog A (Chlamydomonas)	10	33.9051	0.558			0.37	2.46e-06
334	ENSMUST00000102549	liver.int.EAA	Nipal3	NIPA-like domain containing 3	4	135.449	1.705			0.37	2.46e-06
335	ENSMUST00000033824	pan.EAA/liver.int.EAA	Lamp1	lysosomal-associated membrane protein 1	8	13.1591	7.695	0.286	0.000333	0.37	2.47e-06
336	ENSMUST00000160942	pan.EAA/liver.int.EAA	Fam83a	family with sequence similarity 83, member A	15	57.9854	0.44	0.334	2.51e-05	0.37	2.48e-06
337	ENSMUST00000163949	liver.int.EAA	Mest	mesoderm specific transcript	6	30.738	1.314			0.37	2.48e-06
338	ENSMUST00000000756	liver.int.EAA	Rpl13	ribosomal protein L13	8	123.102	8.574			-0.37	2.49e-06
339	ENSMUST00000004072	liver.int.EAA	Rpl8	ribosomal protein L8	15	76.9041	8.552			-0.37	2.51e-06
340	ENSMUST00000181586	liver.int.EAA	Cox4i1	cytochrome c oxidase subunit IV isoform 1	8	120.668	9.085			-0.37	2.53e-06
341	ENSMUST00000048807	liver.int.EAA	Mis12	MIS12 homolog (yeast)	11	71.0196	2.088			0.37	2.54e-06
342	ENSMUST00000183130	liver.int.EAA	Ccdc166	coiled-coil domain containing 166	15	75.9808	1.379			-0.37	2.55e-06
343	ENSMUST00000160705	pan.EAA/liver.int.EAA	Umad1	UMAP1-MVP12 associated (UMA) domain containing 1	6	8.25943	3.666	0.265	0.000928	0.37	2.56e-06
344	ENSMUST00000020113	liver.int.EAA	Poc1b	POC1 centriolar protein homolog B (Chlamydomonas)	10	99.107	1.473			0.37	2.56e-06
345	ENSMUST00000034276	liver.int.EAA	Cox4i1	cytochrome c oxidase subunit IV isoform 1	8	120.668	9.121			-0.37	2.57e-06
346	ENSMUST00000114985	pan.EAA/liver.int.EAA	Tcf4	transcription factor 4	18	69.3445	1.621	0.297	0.000195	0.369	2.64e-06
347	ENSMUST00000038080	pan.EAA/liver.int.EAA	Fer	fer (fms/fps related) protein kinase	17	63.938	1.475	0.265	0.000944	0.369	2.65e-06
348	ENSMUST00000113682	liver.int.EAA	Myg1	melanocyte proliferating gene 1	15	102.332	3.768			-0.369	2.66e-06
349	ENSMUST00000072585	pan.EAA/liver.int.EAA	Pgm3	phosphoglucomutase 3	9	86.555	2.618	0.257	0.00136	0.369	2.71e-06
350	ENSMUST00000102694	pan.EAA/liver.int.EAA	Ptgfrn	prostaglandin F2 receptor negative regulator	3	101.04	0.723	0.242	0.00261	0.369	2.71e-06
351	ENSMUST00000114139	liver.int.EAA	Fam3a	family with sequence similarity 3, member A	X	74.3853	3.566			0.369	2.74e-06
352	ENSMUST00000022369	liver.int.EAA	Vcl	vinculin	14	20.9294	2.284			0.369	2.75e-06
353	ENSMUST00000126662	liver.int.EAA	Gm21974	predicted gene 21974	7	127.886	6.105			-0.368	2.79e-06
354	ENSMUST00000124665	liver.int.EAA	Mest	mesoderm specific transcript	6	30.7381	1.282			0.368	2.79e-06
355	ENSMUST00000166658	liver.int.EAA	Pfdn5	prefoldin 5	15	102.326	5.54			-0.368	2.83e-06
356	ENSMUST00000093923	liver.int.EAA	Cdc27	cell division cycle 27	11	104.503	1.823			0.368	2.86e-06
357	ENSMUST00000049206	liver.int.EAA	Arhgef3	Rho guanine nucleotide exchange factor (GEF) 3	14	27.238	2.818			0.368	2.86e-06
358	ENSMUST00000004554	liver.int.EAA	Rps5	ribosomal protein S5	7	12.9223	7.967			-0.368	2.88e-06
359	ENSMUST00000108539	liver.int.EAA	Rps5	ribosomal protein S5	7	12.9223	7.906			-0.368	2.89e-06
360	ENSMUST00000074671	pan.EAA/liver.int.EAA	Hamp2	hepcidin antimicrobial peptide 2	7	30.9224	8.935	-0.385	8.98e-07	-0.367	2.98e-06
361	ENSMUST00000115055	liver.int.EAA	Fam107b	family with sequence similarity 107, member B	2	3.70401	4.389			0.367	2.98e-06
362	ENSMUST00000181570	pan.EAA/liver.int.EAA	Gpr137b-ps	G protein-coupled receptor 137B, pseudogene	13	12.6191	0.522	0.322	4.99e-05	0.367	2.99e-06
363	ENSMUST00000060479	liver.int.EAA	Ush2a	Usher syndrome 2A (autosomal recessive, mild)	1	188.263	0.02			0.367	3.03e-06
364	ENSMUST00000109731	liver.int.EAA	Cdk5rap1	CDK5 regulatory subunit associated protein 1	2	154.335	2.242			-0.367	3.04e-06
365	ENSMUST00000157040	liver.int.EAA	Mest	mesoderm specific transcript	6	30.7335	1.33			0.367	3.05e-06
366	ENSMUST00000132607	liver.int.EAA	Slc45a4	solute carrier family 45, member 4	15	73.5816	1.834			0.367	3.14e-06
367	ENSMUST00000175975	liver.int.EAA	Cux1	cut-like homeobox 1	5	136.268	0.902			0.367	3.14e-06
368	ENSMUST00000028106	liver.int.EAA	Itga8	integrin alpha 8	2	12.1066	0.763			0.367	3.15e-06
369	ENSMUST00000028990	liver.int.EAA	Cdk5rap1	CDK5 regulatory subunit associated protein 1	2	154.335	2.345			-0.367	3.17e-06
370	ENSMUST00000146867	liver.int.EAA	Rps2	ribosomal protein S2	17	24.7203	9.59			-0.366	3.18e-06
371	ENSMUST00000023835	liver.int.EAA	Slc10a2	solute carrier family 10, member 2	8	5.08562	2.13			0.366	3.2e-06
372	ENSMUST00000170715	liver.int.EAA	Rps2	ribosomal protein S2	17	24.7201	9.539			-0.366	3.21e-06
373	ENSMUST00000171686	liver.int.EAA	Rpp40	ribonuclease P 40 subunit	13	35.8935	0.922			-0.366	3.22e-06
374	ENSMUST00000054289	liver.int.EAA	Rps2	ribosomal protein S2	17	24.7201	9.41			-0.366	3.22e-06
375	ENSMUST00000078486	pan.EAA/liver.int.EAA	Tcf4	transcription factor 4	18	69.3457	1.786	0.292	0.000249	0.366	3.26e-06
376	ENSMUST00000004097	liver.int.EAA	Cux1	cut-like homeobox 1	5	136.266	0.868			0.366	3.26e-06
377	ENSMUST00000185641	liver.int.EAA	Atp5g2	ATP synthase, H+ transporting, mitochondrial F0 complex, subunit C2 (subunit 9)	15	102.663	7.336			-0.366	3.27e-06
378	ENSMUST00000106307	liver.int.EAA	Hivep3	human immunodeficiency virus type I enhancer binding protein 3	4	119.814	0.146			0.366	3.37e-06
379	ENSMUST00000112198	liver.int.EAA	Kdm5b	lysine (K)-specific demethylase 5B	1	134.56	1.708			0.365	3.41e-06
380	ENSMUST00000134176	liver.int.EAA	Fam98c	family with sequence similarity 98, member C	7	29.1525	3.626			-0.365	3.47e-06
381	ENSMUST00000136404	pan.EAA/liver.int.EAA	Mbnl3	muscleblind-like 3 (Drosophila)	X	51.1205	0.127	0.395	4.27e-07	0.365	3.5e-06
382	ENSMUST00000159335	pan.EAA/liver.int.EAA	Umad1	UMAP1-MVP12 associated (UMA) domain containing 1	6	8.25929	1.927	0.267	0.000866	0.365	3.5e-06
383	ENSMUST00000170627	liver.int.EAA	Pfdn5	prefoldin 5	15	102.326	6.927			-0.365	3.5e-06
384	ENSMUST00000166495	liver.int.EAA	Dnajc1	DnaJ (Hsp40) homolog, subfamily C, member 1	2	18.2137	2.662			0.365	3.5e-06
385	ENSMUST00000024906	liver.int.EAA	Twsg1	twisted gastrulation homolog 1 (Drosophila)	17	65.9231	3.565			0.365	3.56e-06
386	ENSMUST00000200323	liver.int.EAA	Stard3nl	STARD3 N-terminal like	13	19.365	2.262			0.365	3.61e-06
387	ENSMUST00000033898	pan.EAA/liver.int.EAA	Col4a1	collagen, type IV, alpha 1	8	11.1984	2.443	0.264	0.000993	0.365	3.62e-06
388	ENSMUST00000194767	pan.EAA/liver.int.EAA	Gm37468	predicted gene, 37468	3	15.5475	0.018	0.327	3.67e-05	0.364	3.63e-06
389	ENSMUST00000098990	liver.int.EAA	Arfip1	ADP-ribosylation factor interacting protein 1	3	84.4961	2.64			0.364	3.63e-06
390	ENSMUST00000162947	liver.int.EAA	Fnbp1l	formin binding protein 1-like	3	122.542	1.424			0.364	3.66e-06
391	ENSMUST00000114554	pan.EAA/liver.int.EAA	Gabra3	gamma-aminobutyric acid (GABA) A receptor, subunit alpha 3	X	72.4346	0.441	0.246	0.00218	0.364	3.72e-06
392	ENSMUST00000135500	liver.int.EAA	Rpl18	ribosomal protein L18	7	45.7182	7.899			-0.364	3.8e-06
393	ENSMUST00000002007	liver.int.EAA	Siae	sialic acid acetylesterase	9	37.6138	3.419			0.364	3.82e-06
394	ENSMUST00000123128	pan.EAA/liver.int.EAA	Myo5a	myosin VA	9	75.0712	0.196	0.25	0.0018	0.364	3.83e-06
395	ENSMUST00000113294	pan.EAA/liver.int.EAA	Sytl4	synaptotagmin-like 4	X	133.946	0.29	0.261	0.00112	0.363	3.9e-06
396	ENSMUST00000202155	liver.int.EAA	Uso1	USO1 vesicle docking factor	5	92.1379	4.142			0.363	3.93e-06
397	ENSMUST00000115075	liver.int.EAA	Rpl35a	ribosomal protein L35A	16	33.057	7.936			-0.363	3.96e-06
398	ENSMUST00000191471	liver.int.EAA	Lmbrd1	LMBR1 domain containing 1	1	24.6786	3.519			0.363	3.96e-06
399	ENSMUST00000071728	pan.EAA/liver.int.EAA	Osbpl3	oxysterol binding protein-like 3	6	50.2968	0.901	0.256	0.00138	0.363	3.97e-06
400	ENSMUST00000115078	liver.int.EAA	Rpl35a	ribosomal protein L35A	16	33.0565	7.981			-0.363	3.98e-06
401	ENSMUST00000109521	liver.int.EAA	Polr2c	polymerase (RNA) II (DNA directed) polypeptide C	8	94.8574	3.81			-0.363	3.98e-06
402	ENSMUST00000115054	liver.int.EAA	Fam107b	family with sequence similarity 107, member B	2	3.70481	4.198			0.363	3.98e-06
403	ENSMUST00000114466	pan.EAA/liver.int.EAA	Osbpl3	oxysterol binding protein-like 3	6	50.2968	0.966	0.253	0.00164	0.363	3.99e-06
404	ENSMUST00000072503	liver.int.EAA	Rpl18	ribosomal protein L18	7	45.7181	8.495			-0.363	4.03e-06
405	ENSMUST00000115076	liver.int.EAA	Rpl35a	ribosomal protein L35A	16	33.0568	7.922			-0.363	4.07e-06
406	ENSMUST00000154148	liver.int.EAA	Gm37240	predicted gene, 37240	3	84.4964	2.429			0.363	4.08e-06
407	ENSMUST00000023104	pan.EAA/liver.int.EAA	Rpap3	RNA polymerase II associated protein 3; (BXD Mendelian reference 15.98, high B)	15	97.6751	2.653	0.266	0.000881	0.363	4.1e-06
408	ENSMUST00000038144	pan.EAA/liver.int.EAA	Esm1	endothelial cell-specific molecule 1	13	113.21	0.625	0.294	0.000224	0.363	4.12e-06
409	ENSMUST00000185439	pan.EAA/liver.int.EAA	1700061E17Rik	RIKEN cDNA 1700061E17 gene	9	110.986	3.293	0.263	0.00102	0.362	4.14e-06
410	ENSMUST00000022894	liver.int.EAA	Ywhaz	tyrosine 3-monooxygenase/tryptophan 5-monooxygenase activation protein, zeta polypeptide	15	36.7708	4.847			0.362	4.2e-06
411	ENSMUST00000075178	liver.int.EAA	Rpl18	ribosomal protein L18	7	45.7155	6.387			-0.362	4.21e-06
412	ENSMUST00000106429	liver.int.EAA	1810037I17Rik	RIKEN cDNA 1810037I17 gene	3	122.924	4.267			-0.362	4.22e-06
413	ENSMUST00000088448	liver.int.EAA	Pkhd1	polycystic kidney and hepatic disease 1	1	20.0578	0.494			0.362	4.23e-06
414	ENSMUST00000035571	pan.EAA/liver.int.EAA	Cyp3a59	cytochrome P450, family 3, subfamily a, polypeptide 59	5	146.079	3.694	-0.288	0.00031	-0.362	4.25e-06
415	ENSMUST00000067512	liver.int.EAA	Smpd3	sphingomyelin phosphodiesterase 3, neutral	8	106.253	0.982			0.362	4.26e-06
416	ENSMUST00000115053	liver.int.EAA	Fam107b	family with sequence similarity 107, member B	2	3.71348	4.185			0.362	4.3e-06
417	ENSMUST00000142064	pan.EAA/liver.int.EAA	Dpy19l1	dpy-19-like 1 (C. elegans)	9	24.4118	3.166	0.26	0.00115	0.362	4.33e-06
418	ENSMUST00000078804	liver.int.EAA	Rpl35a	ribosomal protein L35A	16	33.0565	8.027			-0.362	4.38e-06
419	ENSMUST00000115079	liver.int.EAA	Rpl35a	ribosomal protein L35A	16	33.0565	7.979			-0.362	4.38e-06
420	ENSMUST00000056097	pan.EAA/liver.int.EAA	Themis	thymocyte selection associated	10	28.6684	0.178	0.355	6.93e-06	0.361	4.43e-06
421	ENSMUST00000110362	liver.int.EAA	Ywhaz	tyrosine 3-monooxygenase/tryptophan 5-monooxygenase activation protein, zeta polypeptide	15	36.7717	5.03			0.361	4.43e-06
422	ENSMUST00000143710	liver.int.EAA	Gm16214	predicted gene 16214	9	42.0226	0.528			0.361	4.47e-06
423	ENSMUST00000112254	liver.int.EAA	Vwf	Von Willebrand factor homolog	6	125.553	1.328			0.361	4.48e-06
424	ENSMUST00000035625	pan.EAA/liver.int.EAA	Cyp7b1	cytochrome P450, family 7, subfamily b, polypeptide 1	3	18.0719	3.226	0.282	0.000407	0.361	4.5e-06
425	ENSMUST00000174766	liver.int.EAA	L3mbtl3	l(3)mbt-like 3 (Drosophila)	10	26.2755	1.109			0.361	4.52e-06
426	ENSMUST00000044766	pan.EAA/liver.int.EAA	4930402H24Rik	RIKEN cDNA 4930402H24 gene	2	130.706	2.215	0.25	0.0018	0.361	4.54e-06
427	ENSMUST00000161659	liver.int.EAA	Slc33a1	solute carrier family 33 (acetyl-CoA transporter), member 1	3	63.9335	3.987			0.361	4.54e-06
428	ENSMUST00000165532	liver.int.EAA	Rpl14	ribosomal protein L14	9	120.572	7.642			-0.361	4.56e-06
429	ENSMUST00000033961	liver.int.EAA	Tm2d2	TM2 domain containing 2	8	25.0172	5.264			-0.361	4.58e-06
430	ENSMUST00000176778	liver.int.EAA	Cux1	cut-like homeobox 1	5	136.274	1.301			0.361	4.59e-06
431	ENSMUST00000057258	liver.int.EAA	Zfp518b	zinc finger protein 518B	5	38.6685	0.346			0.361	4.61e-06
432	ENSMUST00000105701	liver.int.EAA	Masp2	mannan-binding lectin serine peptidase 2	4	148.603	6.826			0.361	4.62e-06
433	ENSMUST00000163483	liver.int.EAA	Rab1	RAB1, member RAS oncogene family	11	20.2016	5.265			0.361	4.66e-06
434	ENSMUST00000120512	liver.int.EAA	Mdfic	MyoD family inhibitor domain containing	6	15.7211	3.214			0.361	4.67e-06
435	ENSMUST00000021179	liver.int.EAA	Vmo1	vitelline membrane outer layer 1 homolog (chicken)	11	70.5135	2.615			-0.361	4.71e-06
436	ENSMUST00000174030	liver.int.EAA	Ciao1	cytosolic iron-sulfur protein assembly 1	2	127.243	4.466			-0.36	4.72e-06
437	ENSMUST00000179555	liver.int.EAA	Zfp518b	zinc finger protein 518B	5	38.6685	0.345			0.36	4.81e-06
438	ENSMUST00000075630	liver.int.EAA	Atp5g2	ATP synthase, H+ transporting, mitochondrial F0 complex, subunit C2 (subunit 9)	15	102.663	7.934			-0.36	4.82e-06
439	ENSMUST00000074546	pan.EAA/liver.int.EAA	Sdk1	sidekick homolog 1 (chicken)	5	141.857	0.037	0.286	0.000341	0.36	4.94e-06
440	ENSMUST00000114141	liver.int.EAA	Fam3a	family with sequence similarity 3, member A	X	74.3852	3.394			0.36	4.97e-06
441	ENSMUST00000178155	liver.int.EAA	Smim22	small integral membrane protein 22	16	5.00734	2.489			-0.36	4.98e-06
442	ENSMUST00000068791	pan.EAA/liver.int.EAA	Eif2d	eukaryotic translation initiation factor 2D	1	131.153	3.208	0.296	0.000202	0.36	4.99e-06
443	ENSMUST00000201350	pan.EAA/liver.int.EAA	RP23-222G22.5	0	6	126.822	5.117	-0.241	0.00272	-0.36	5.01e-06
444	ENSMUST00000185147	liver.int.EAA	Smim22	small integral membrane protein 22	16	5.00735	2.569			-0.359	5.13e-06
445	ENSMUST00000022543	liver.int.EAA	Micu2	mitochondrial calcium uptake 2	14	57.9163	4.02			0.359	5.15e-06
446	ENSMUST00000020008	liver.int.EAA	Gopc	golgi associated PDZ and coiled-coil motif containing	10	52.337	2.588			0.359	5.24e-06
447	ENSMUST00000029800	pan.EAA/liver.int.EAA	Tspan5	tetraspanin 5	3	138.742	0.193	0.299	0.000178	0.359	5.26e-06
448	ENSMUST00000064405	liver.int.EAA	Epha3	Eph receptor A3	16	63.5435	0.08			0.359	5.28e-06
449	ENSMUST00000114142	liver.int.EAA	Fam3a	family with sequence similarity 3, member A	X	74.3848	3.378			0.359	5.3e-06
450	ENSMUST00000105475	liver.int.EAA	Gopc	golgi associated PDZ and coiled-coil motif containing	10	52.337	2.581			0.359	5.3e-06
451	ENSMUST00000121826	liver.int.EAA	Tspan5	tetraspanin 5	3	138.86	0.39			0.358	5.39e-06
452	ENSMUST00000117446	liver.int.EAA	Pttg1	pituitary tumor-transforming gene 1; (BXD Mendelian reference 11.43, high B)	11	43.4203	2.648			0.358	5.42e-06
453	ENSMUST00000032802	liver.int.EAA	Zfp84	zinc finger protein 84	7	29.7686	1.204			0.358	5.45e-06
454	ENSMUST00000004379	liver.int.EAA	Emg1	EMG1 nucleolar protein homolog (S. cerevisiae)	6	124.704	5.335			-0.358	5.46e-06
455	ENSMUST00000052478	pan.EAA/liver.int.EAA	Dmrta1	doublesex and mab-3 related transcription factor like family A1	4	89.6882	0.598	0.286	0.00034	0.358	5.5e-06
456	ENSMUST00000020685	liver.int.EAA	Pttg1	pituitary tumor-transforming gene 1	11	43.421	3.689			0.358	5.5e-06
457	ENSMUST00000110361	liver.int.EAA	Ywhaz	tyrosine 3-monooxygenase/tryptophan 5-monooxygenase activation protein, zeta polypeptide	15	36.7716	4.971			0.358	5.53e-06
458	ENSMUST00000184439	liver.int.EAA	Smim22	small integral membrane protein 22	16	5.00729	2.561			-0.358	5.54e-06
459	ENSMUST00000031355	liver.int.EAA	Uso1	USO1 vesicle docking factor	5	92.1379	4.113			0.358	5.55e-06
460	ENSMUST00000035038	liver.int.EAA	Faim	Fas apoptotic inhibitory molecule	9	98.9864	2.585			0.358	5.57e-06
461	ENSMUST00000095187	liver.int.EAA	Srbd1	S1 RNA binding domain 1	17	85.9847	2.106			0.358	5.6e-06
462	ENSMUST00000015277	liver.int.EAA	Lrrk1	leucine-rich repeat kinase 1	7	66.2587	1.652			0.358	5.64e-06
463	ENSMUST00000049537	liver.int.EAA	Picalm	phosphatidylinositol binding clathrin assembly protein	7	90.1302	3.947			0.358	5.65e-06
464	ENSMUST00000031281	liver.int.EAA	Antxr2	anthrax toxin receptor 2	5	97.8828	2.211			0.358	5.66e-06
465	ENSMUST00000121638	liver.int.EAA	Pttg1	pituitary tumor-transforming gene 1	11	43.4203	3.271			0.357	5.83e-06
466	ENSMUST00000187307	liver.int.EAA	Wdr89	WD repeat domain 89	12	75.6314	0.561			0.357	5.87e-06
467	ENSMUST00000120034	liver.int.EAA	Fuom	fucose mutarotase	7	140.097	4.294			-0.357	5.88e-06
468	ENSMUST00000118368	liver.int.EAA	Pttg1	pituitary tumor-transforming gene 1	11	43.4203	3.648			0.357	5.89e-06
469	ENSMUST00000020687	liver.int.EAA	Pttg1	pituitary tumor-transforming gene 1	11	43.4202	3.571			0.357	5.9e-06
470	ENSMUST00000101340	liver.int.EAA	Pttg1	pituitary tumor-transforming gene 1	11	43.4203	3.641			0.357	5.93e-06
471	ENSMUST00000170356	pan.EAA/liver.int.EAA	Dpy19l1	dpy-19-like 1 (C. elegans)	9	24.4118	2.927	0.252	0.00169	0.357	6e-06
472	ENSMUST00000084922	pan.EAA/liver.int.EAA	Rtp3	receptor transporter protein 3	9	110.986	3.782	0.264	0.000973	0.357	6.01e-06
473	ENSMUST00000032597	pan.EAA/liver.int.EAA	Rpl28	ribosomal protein L28	7	4.79287	8.833	-0.273	0.000643	-0.357	6.02e-06
474	ENSMUST00000062492	liver.int.EAA	Pfdn5	prefoldin 5	15	102.326	6.565			-0.357	6.06e-06
475	ENSMUST00000173270	liver.int.EAA	Stard10	START domain containing 10	7	101.322	10.32			-0.357	6.09e-06
476	ENSMUST00000081631	liver.int.EAA	Mettl15	methyltransferase like 15	2	109.092	1.173			0.356	6.12e-06
477	ENSMUST00000169404	liver.int.EAA	Pde7b	phosphodiesterase 7B	10	20.4004	1.436			0.356	6.16e-06
478	ENSMUST00000066531	liver.int.EAA	Btnl9	butyrophilin-like 9	11	49.1691	0.938			0.356	6.17e-06
479	ENSMUST00000092170	liver.int.EAA	Tmem19	transmembrane protein 19	10	115.341	5.162			0.356	6.2e-06
480	ENSMUST00000177637	pan.EAA/liver.int.EAA	Cx3cr1	chemokine (C-X3-C motif) receptor 1	9	119.902	0.482	0.289	0.000285	0.356	6.21e-06
481	ENSMUST00000111063	liver.int.EAA	Mpped2	metallophosphoesterase domain containing 2	2	106.693	0.415			0.356	6.25e-06
482	ENSMUST00000084215	liver.int.EAA	Eif4g3	eukaryotic translation initiation factor 4 gamma, 3	4	137.993	2.948			0.356	6.27e-06
483	ENSMUST00000084214	liver.int.EAA	Eif4g3	eukaryotic translation initiation factor 4 gamma, 3	4	137.993	3.29			0.356	6.45e-06
484	ENSMUST00000105831	liver.int.EAA	Eif4g3	eukaryotic translation initiation factor 4 gamma, 3	4	137.993	3.276			0.355	6.5e-06
485	ENSMUST00000080861	liver.int.EAA	Rpl35	ribosomal protein L35	2	39.0016	6.859			-0.355	6.54e-06
486	ENSMUST00000078432	pan.EAA/liver.int.EAA	Rpl28	ribosomal protein L28	7	4.79299	8.471	-0.273	0.000628	-0.355	6.56e-06
487	ENSMUST00000091418	liver.int.EAA	Dnajc1	DnaJ (Hsp40) homolog, subfamily C, member 1	2	18.2063	2.39			0.355	6.6e-06
488	ENSMUST00000092058	pan.EAA/liver.int.EAA	BC089597	cDNA sequence BC089597	10	127.866	7.475	-0.373	2.11e-06	-0.355	6.61e-06
489	ENSMUST00000176172	liver.int.EAA	Cux1	cut-like homeobox 1	5	136.274	1.393			0.355	6.65e-06
490	ENSMUST00000121778	pan.EAA/liver.int.EAA	Ndufb5	NADH dehydrogenase (ubiquinone) 1 beta subcomplex, 5	3	32.7371	6.469	-0.263	0.00101	-0.355	6.74e-06
491	ENSMUST00000136731	liver.int.EAA	Myo5a	myosin VA	9	75.0716	0.274			0.355	6.74e-06
492	ENSMUST00000026554	pan.EAA/liver.int.EAA	Urah	urate (5-hydroxyiso-) hydrolase	7	140.835	7.074	-0.275	0.000592	-0.355	6.76e-06
493	ENSMUST00000090019	pan.EAA/liver.int.EAA	Osbpl3	oxysterol binding protein-like 3	6	50.2957	0.841	0.252	0.00169	0.355	6.77e-06
494	ENSMUST00000099888	pan.EAA/liver.int.EAA	F930017D23Rik	RIKEN cDNA F930017D23 gene	10	43.5934	0.014	0.245	0.00231	0.355	6.88e-06
495	ENSMUST00000096192	liver.int.EAA	Vps8	vacuolar protein sorting 8 homolog (S. cerevisiae)	16	21.4231	1.342			0.354	6.98e-06
496	ENSMUST00000191138	liver.int.EAA	Hivep2	human immunodeficiency virus type I enhancer binding protein 2	10	13.9664	0.809			0.354	7.01e-06
497	ENSMUST00000110416	liver.int.EAA	Usp8	ubiquitin specific peptidase 8	2	126.707	3.491			0.354	7.03e-06
498	ENSMUST00000028841	liver.int.EAA	Usp8	ubiquitin specific peptidase 8	2	126.707	3.494			0.354	7.03e-06
499	ENSMUST00000096316	liver.int.EAA	Naa10	N(alpha)-acetyltransferase 10, NatA catalytic subunit	X	73.9175	4.23			-0.354	7.04e-06
500	ENSMUST00000115632	liver.int.EAA	Mre11a	meiotic recombination 11 homolog A (S. cerevisiae)	9	14.7847	0.918			0.354	7.04e-06
501	ENSMUST00000015645	liver.int.EAA	Hivep2	human immunodeficiency virus type I enhancer binding protein 2	10	13.9664	0.814			0.354	7.07e-06
502	ENSMUST00000169713	liver.int.EAA	Plce1	phospholipase C, epsilon 1	19	38.5242	1.203			0.354	7.14e-06
503	ENSMUST00000107503	pan.EAA/liver.int.EAA	Syt11	synaptotagmin XI	3	88.7447	0.696	0.327	3.72e-05	0.354	7.2e-06
504	ENSMUST00000117598	liver.int.EAA	Vps8	vacuolar protein sorting 8 homolog (S. cerevisiae)	16	21.4232	1.345			0.354	7.26e-06
505	ENSMUST00000033030	liver.int.EAA	Parva	parvin, alpha	7	112.428	4.178			0.354	7.28e-06
506	ENSMUST00000068408	liver.int.EAA	Rps15	ribosomal protein S15	10	80.2925	8.631			-0.354	7.29e-06
507	ENSMUST00000114468	pan.EAA/liver.int.EAA	Osbpl3	oxysterol binding protein-like 3	6	50.2933	0.729	0.255	0.00144	0.354	7.31e-06
508	ENSMUST00000062674	liver.int.EAA	Rps15	ribosomal protein S15	10	80.2926	8.436			-0.354	7.33e-06
509	ENSMUST00000118923	liver.int.EAA	Vps8	vacuolar protein sorting 8 homolog (S. cerevisiae)	16	21.4232	1.358			0.354	7.33e-06
510	ENSMUST00000115397	liver.int.EAA	Vps8	vacuolar protein sorting 8 homolog (S. cerevisiae)	16	21.4231	1.329			0.354	7.35e-06
511	ENSMUST00000112669	liver.int.EAA	3830406C13Rik	RIKEN cDNA 3830406C13 gene	14	12.2842	2.262			0.353	7.47e-06
512	ENSMUST00000163392	liver.int.EAA	3830406C13Rik	RIKEN cDNA 3830406C13 gene	14	12.2842	2.289			0.353	7.47e-06
513	ENSMUST00000164589	liver.int.EAA	Fam98c	family with sequence similarity 98, member C	7	29.1525	3.588			-0.353	7.5e-06
514	ENSMUST00000182267	liver.int.EAA	Plce1	phospholipase C, epsilon 1	19	38.5242	1.329			0.353	7.52e-06
515	ENSMUST00000184256	liver.int.EAA	Smim22	small integral membrane protein 22	16	5.00735	2.586			-0.353	7.55e-06
516	ENSMUST00000031072	liver.int.EAA	Anapc4	anaphase promoting complex subunit 4	5	52.834	2.189			0.353	7.55e-06
517	ENSMUST00000085745	liver.int.EAA	Wdr35	WD repeat domain 35	12	8.97389	0.784			0.353	7.57e-06
518	ENSMUST00000112446	pan.EAA/liver.int.EAA	Eif2d	eukaryotic translation initiation factor 2D	1	131.153	3.838	0.293	0.00024	0.353	7.64e-06
519	ENSMUST00000156876	liver.int.EAA	Mfsd6	major facilitator superfamily domain containing 6	1	52.6563	1.37			0.353	7.64e-06
520	ENSMUST00000040149	pan.EAA/liver.int.EAA	Atp8b4	ATPase, class I, type 8B, member 4	2	126.323	0.2	0.29	0.000282	0.353	7.65e-06
521	ENSMUST00000155282	liver.int.EAA	Myo5a	myosin VA	9	75.0714	0.274			0.353	7.66e-06
522	ENSMUST00000040735	pan.EAA/liver.int.EAA	Amdhd2	amidohydrolase domain containing 2	17	24.1558	4.044	0.399	3.35e-07	0.353	7.72e-06
523	ENSMUST00000111113	liver.int.EAA	Wdr35	WD repeat domain 35	12	8.97405	0.81			0.353	7.78e-06
524	ENSMUST00000100028	pan.EAA/liver.int.EAA	Dync1i2	dynein cytoplasmic 1 intermediate chain 2	2	71.212	3.773	0.258	0.00127	0.353	7.79e-06
525	ENSMUST00000040069	liver.int.EAA	Colec12	collectin sub-family member 12	18	9.70765	3.223			0.353	7.82e-06
526	ENSMUST00000105901	liver.int.EAA	Kdf1	keratinocyte differentiation factor 1	4	133.519	1.981			-0.353	7.85e-06
527	ENSMUST00000006544	pan.EAA/liver.int.EAA	Gcat	glycine C-acetyltransferase (2-amino-3-ketobutyrate-coenzyme A ligase)	15	79.0309	5.067	-0.294	0.000224	-0.352	7.87e-06
528	ENSMUST00000068805	pan.EAA/liver.int.EAA	Eif2d	eukaryotic translation initiation factor 2D	1	131.153	3.935	0.292	0.000248	0.353	7.87e-06
529	ENSMUST00000167721	pan.EAA/liver.int.EAA	Actb	actin, beta	5	142.904	8.126	0.298	0.000187	0.352	7.92e-06
530	ENSMUST00000106050	pan.EAA/liver.int.EAA	Urah	urate (5-hydroxyiso-) hydrolase	7	140.835	7.388	-0.27	0.000724	-0.352	7.97e-06
531	ENSMUST00000121869	liver.int.EAA	Dzip3	DAZ interacting protein 3, zinc finger	16	48.9242	0.241			0.352	8.01e-06
532	ENSMUST00000028702	liver.int.EAA	Adal	adenosine deaminase-like	2	121.14	2.167			0.352	8.02e-06
533	ENSMUST00000176254	liver.int.EAA	Fam107b	family with sequence similarity 107, member B	2	3.77394	4.323			0.352	8.12e-06
534	ENSMUST00000130360	pan.EAA/liver.int.EAA	Synpo	synaptopodin	18	60.594	1.847	0.273	0.000649	0.352	8.21e-06
535	ENSMUST00000022701	liver.int.EAA	Rb1	retinoblastoma 1	14	73.1955	1.042			0.352	8.22e-06
536	ENSMUST00000029266	pan.EAA/liver.int.EAA	Anxa5	annexin A5	3	36.4489	5.205	0.35	9.24e-06	0.352	8.25e-06
537	ENSMUST00000162443	pan.EAA/liver.int.EAA	C1s1	complement component 1, s subcomponent 1	6	124.53	6.818	0.26	0.00118	0.352	8.28e-06
538	ENSMUST00000160505	pan.EAA/liver.int.EAA	C1s1	complement component 1, s subcomponent 1	6	124.53	6.798	0.26	0.00118	0.352	8.29e-06
539	ENSMUST00000114415	liver.int.EAA	Satb2	special AT-rich sequence binding protein 2	1	56.794	0.19			0.352	8.34e-06
540	ENSMUST00000028005	pan.EAA/liver.int.EAA	Mgst3	microsomal glutathione S-transferase 3	1	167.372	4.535	-0.278	0.000509	-0.352	8.35e-06
541	ENSMUST00000112911	liver.int.EAA	Faim	Fas apoptotic inhibitory molecule	9	98.9864	2.795			0.352	8.35e-06
542	ENSMUST00000193734	liver.int.EAA	Tbl1xr1	transducin (beta)-like 1X-linked receptor 1	3	22.0767	1.99			0.352	8.36e-06
543	ENSMUST00000093107	liver.int.EAA	P4ha2	procollagen-proline, 2-oxoglutarate 4-dioxygenase (proline 4-hydroxylase), alpha II polypeptide	11	54.1009	1.622			0.352	8.37e-06
544	ENSMUST00000127477	pan.EAA/liver.int.EAA	Ndufb5	NADH dehydrogenase (ubiquinone) 1 beta subcomplex, 5	3	32.737	5.78	-0.258	0.0013	-0.351	8.4e-06
545	ENSMUST00000161614	liver.int.EAA	Gm4524	predicted gene 4524	16	25.9565	0.346			0.351	8.44e-06
546	ENSMUST00000162969	pan.EAA/liver.int.EAA	Ppm1h	protein phosphatase 1H (PP2C domain containing)	10	122.895	0.707	0.34	1.68e-05	0.351	8.45e-06
547	ENSMUST00000167746	liver.int.EAA	Cmah	cytidine monophospho-N-acetylneuraminic acid hydroxylase	13	24.3274	2.762			0.351	8.53e-06
548	ENSMUST00000038257	pan.EAA/liver.int.EAA	Gstt2	glutathione S-transferase, theta 2	10	75.8318	5.398	-0.254	0.00152	-0.351	8.57e-06
549	ENSMUST00000110391	liver.int.EAA	Cmah	cytidine monophospho-N-acetylneuraminic acid hydroxylase	13	24.4151	2.775			0.351	8.57e-06
550	ENSMUST00000182481	liver.int.EAA	Plce1	phospholipase C, epsilon 1	19	38.4811	1.306			0.351	8.61e-06
551	ENSMUST00000084724	liver.int.EAA	3110043O21Rik	RIKEN cDNA 3110043O21 gene	4	35.1913	1.468			0.351	8.66e-06
552	ENSMUST00000028251	liver.int.EAA	Rbm18	RNA binding motif protein 18	2	36.1161	2.481			0.351	8.71e-06
553	ENSMUST00000091790	liver.int.EAA	Atp9b	ATPase, class II, type 9B	18	80.7341	2.63			0.351	8.75e-06
554	ENSMUST00000109213	liver.int.EAA	Trim7	tripartite motif-containing 7	11	48.8261	1.886			0.351	8.79e-06
555	ENSMUST00000067602	liver.int.EAA	Ncam2	neural cell adhesion molecule 2	16	81.2007	0.295			0.351	8.81e-06
556	ENSMUST00000174616	liver.int.EAA	P4ha2	procollagen-proline, 2-oxoglutarate 4-dioxygenase (proline 4-hydroxylase), alpha II polypeptide	11	54.101	1.673			0.351	8.9e-06
557	ENSMUST00000102593	pan.EAA/liver.int.EAA	Eif3i	eukaryotic translation initiation factor 3, subunit I	4	129.592	5.871	-0.239	0.00296	-0.35	9.03e-06
558	ENSMUST00000037853	liver.int.EAA	Kdelc2	KDEL (Lys-Asp-Glu-Leu) containing 2	9	53.384	1.439			0.35	9.05e-06
559	ENSMUST00000108127	liver.int.EAA	3110043O21Rik	RIKEN cDNA 3110043O21 gene	4	35.1913	1.528			0.35	9.05e-06
560	ENSMUST00000203828	liver.int.EAA	Eif4g3	eukaryotic translation initiation factor 4 gamma, 3	4	137.994	3.361			0.35	9.06e-06
561	ENSMUST00000000122	liver.int.EAA	Ngfr	nerve growth factor receptor (TNFR superfamily, member 16)	11	95.5688	1.55			0.35	9.07e-06
562	ENSMUST00000002350	pan.EAA/liver.int.EAA	Narfl	nuclear prelamin A recognition factor-like	17	25.7738	3.282	-0.251	0.00174	-0.35	9.2e-06
563	ENSMUST00000039990	pan.EAA/liver.int.EAA	P3h2	prolyl 3-hydroxylase 2	16	25.9593	0.654	0.242	0.00259	0.35	9.36e-06
564	ENSMUST00000111466	pan.EAA/liver.int.EAA	C1qtnf4	C1q and tumor necrosis factor related protein 4	2	90.8859	0.746	-0.269	0.000784	-0.35	9.38e-06
565	ENSMUST00000023694	liver.int.EAA	1110004E09Rik	RIKEN cDNA 1110004E09 gene	16	90.9258	3.842			-0.349	9.51e-06
566	ENSMUST00000063988	liver.int.EAA	Tbl1xr1	transducin (beta)-like 1X-linked receptor 1	3	22.0773	2.138			0.35	9.51e-06
567	ENSMUST00000179693	pan.EAA/liver.int.EAA	Ctcfl	CCCTC-binding factor (zinc finger protein)-like	2	173.094	0.756	0.241	0.00266	0.349	9.55e-06
568	ENSMUST00000031617	liver.int.EAA	Rpl6	ribosomal protein L6	5	121.204	7.757			-0.349	9.61e-06
569	ENSMUST00000094287	pan.EAA/liver.int.EAA	Ctcfl	CCCTC-binding factor (zinc finger protein)-like	2	173.094	0.748	0.241	0.00268	0.349	9.67e-06
570	ENSMUST00000064165	pan.EAA/liver.int.EAA	Cx3cr1	chemokine (C-X3-C motif) receptor 1	9	120.049	0.529	0.285	0.000357	0.349	9.74e-06
571	ENSMUST00000019050	liver.int.EAA	P4ha2	procollagen-proline, 2-oxoglutarate 4-dioxygenase (proline 4-hydroxylase), alpha II polypeptide	11	54.101	1.635			0.349	9.81e-06
572	ENSMUST00000192328	liver.int.EAA	Tbl1xr1	transducin (beta)-like 1X-linked receptor 1	3	22.1145	1.822			0.349	9.85e-06
573	ENSMUST00000130296	liver.int.EAA	Gm16090	predicted gene 16090	18	20.598	2.596			0.349	9.87e-06
574	ENSMUST00000042919	liver.int.EAA	Kdf1	keratinocyte differentiation factor 1	4	133.519	1.996			-0.349	9.94e-06
575	ENSMUST00000100832	liver.int.EAA	Recql	RecQ protein-like	6	142.357	1.181			0.349	9.94e-06
576	ENSMUST00000032370	liver.int.EAA	Recql	RecQ protein-like	6	142.35	1.217			0.349	9.99e-06
577	ENSMUST00000080723	liver.int.EAA	Tax1bp1	Tax1 (human T cell leukemia virus type I) binding protein 1	6	52.7137	4.968			0.349	1e-05
578	ENSMUST00000021990	pan.EAA/liver.int.EAA	Ptdss1	phosphatidylserine synthase 1	13	66.9328	3.968	0.248	0.00196	0.349	1.01e-05
579	ENSMUST00000130044	pan.EAA/liver.int.EAA	Synpo	synaptopodin	18	60.594	1.876	0.27	0.000734	0.348	1.02e-05
580	ENSMUST00000097566	pan.EAA/liver.int.EAA	Synpo	synaptopodin	18	60.594	1.858	0.27	0.000741	0.348	1.02e-05
581	ENSMUST00000165671	liver.int.EAA	Pfdn5	prefoldin 5	15	102.326	5.721			-0.348	1.02e-05
582	ENSMUST00000081840	liver.int.EAA	Rpl32	ribosomal protein L32	6	115.806	8.338			-0.348	1.02e-05
583	ENSMUST00000077273	liver.int.EAA	Ext1	exostoses (multiple) 1	15	53.064	2.554			0.348	1.02e-05
584	ENSMUST00000119031	liver.int.EAA	Adal	adenosine deaminase-like	2	121.14	2.078			0.348	1.03e-05
585	ENSMUST00000080300	liver.int.EAA	Rps25	ribosomal protein S25	9	44.4077	8.063			-0.348	1.04e-05
586	ENSMUST00000203816	liver.int.EAA	Rpl32	ribosomal protein L32	6	115.806	7.533			-0.348	1.04e-05
587	ENSMUST00000164243	liver.int.EAA	Srp54b	signal recognition particle 54B	12	55.2393	2.908			0.348	1.04e-05
588	ENSMUST00000103109	liver.int.EAA	Cntnap1	contactin associated protein-like 1	11	101.176	0.702			0.348	1.04e-05
589	ENSMUST00000185612	pan.EAA/liver.int.EAA	Urah	urate (5-hydroxyiso-) hydrolase	7	140.835	7.347	-0.269	0.000771	-0.348	1.05e-05
590	ENSMUST00000105856	liver.int.EAA	Nipal3	NIPA-like domain containing 3	4	135.446	1.433			0.348	1.05e-05
591	ENSMUST00000087978	liver.int.EAA	S1pr3	sphingosine-1-phosphate receptor 3	13	51.4086	0.835			0.348	1.05e-05
592	ENSMUST00000171999	pan.EAA/liver.int.EAA	Gcat	glycine C-acetyltransferase (2-amino-3-ketobutyrate-coenzyme A ligase)	15	79.0309	5.366	-0.292	0.000256	-0.348	1.06e-05
593	ENSMUST00000102814	liver.int.EAA	Rps6	ribosomal protein S6	4	86.8547	8.188			-0.348	1.06e-05
594	ENSMUST00000114390	liver.int.EAA	Naa10	N(alpha)-acetyltransferase 10, NatA catalytic subunit	X	73.9169	5.09			-0.348	1.06e-05
595	ENSMUST00000115277	pan.EAA/liver.int.EAA	Dpy19l1	dpy-19-like 1 (C. elegans)	9	24.4118	2.845	0.249	0.00195	0.348	1.07e-05
596	ENSMUST00000118209	liver.int.EAA	Atp5f1	ATP synthase, H+ transporting, mitochondrial F0 complex, subunit B1	3	105.943	7			-0.348	1.07e-05
597	ENSMUST00000169335	pan.EAA/liver.int.EAA	D630003M21Rik	RIKEN cDNA D630003M21 gene	2	158.186	0.493	0.296	0.000202	0.348	1.08e-05
598	ENSMUST00000199891	pan.EAA/liver.int.EAA	Rtp3	receptor transporter protein 3	9	110.985	3.647	0.266	0.000909	0.348	1.08e-05
599	ENSMUST00000036019	liver.int.EAA	Fras1	Fraser syndrome 1 homolog (human)	5	96.374	0.374			0.348	1.08e-05
600	ENSMUST00000005234	pan.EAA/liver.int.EAA	Wdr1	WD repeat domain 1	5	38.5268	3.836	0.254	0.00154	0.347	1.09e-05
601	ENSMUST00000186051	pan.EAA/liver.int.EAA	Sulf1	sulfatase 1	1	12.6925	0.163	0.243	0.00251	0.347	1.09e-05
602	ENSMUST00000025968	pan.EAA/liver.int.EAA	Cyp2c39	cytochrome P450, family 2, subfamily c, polypeptide 39	19	39.5109	4.297	-0.248	0.00203	-0.347	1.1e-05
603	ENSMUST00000106467	liver.int.EAA	Rwdd3	RWD domain containing 3	3	121.156	2.333			-0.347	1.1e-05
604	ENSMUST00000030110	liver.int.EAA	Zdhhc21	zinc finger, DHHC domain containing 21	4	82.7987	0.887			0.347	1.11e-05
605	ENSMUST00000187083	liver.int.EAA	Hivep2	human immunodeficiency virus type I enhancer binding protein 2	10	13.9661	0.768			0.347	1.11e-05
606	ENSMUST00000106466	liver.int.EAA	Rwdd3	RWD domain containing 3	3	121.155	2.207			-0.347	1.12e-05
607	ENSMUST00000111740	liver.int.EAA	Itgav	integrin alpha V	2	83.7246	1.93			0.347	1.12e-05
608	ENSMUST00000180062	pan.EAA/liver.int.EAA	Sulf1	sulfatase 1	1	12.6923	0.247	0.239	0.00292	0.347	1.13e-05
609	ENSMUST00000112625	liver.int.EAA	Oxsm	3-oxoacyl-ACP synthase, mitochondrial	14	16.2399	3.251			0.347	1.13e-05
610	ENSMUST00000170265	liver.int.EAA	Pde7b	phosphodiesterase 7B	10	20.4004	1.551			0.347	1.13e-05
611	ENSMUST00000050859	liver.int.EAA	Cmah	cytidine monophospho-N-acetylneuraminic acid hydroxylase	13	24.3761	2.482			0.347	1.13e-05
612	ENSMUST00000142739	liver.int.EAA	Nlk	nemo like kinase	11	78.5672	1.517			0.347	1.14e-05
613	ENSMUST00000033184	liver.int.EAA	Tpp1	tripeptidyl peptidase I	7	105.745	4.4			0.347	1.14e-05
614	ENSMUST00000032211	pan.EAA/liver.int.EAA	Gdf3	growth differentiation factor 3	6	122.605	0.342	0.354	7.3e-06	0.346	1.15e-05
615	ENSMUST00000040128	pan.EAA/liver.int.EAA	Atp8b4	ATPase, class I, type 8B, member 4	2	126.321	0.256	0.272	0.000674	0.346	1.15e-05
616	ENSMUST00000070756	liver.int.EAA	Adcyap1r1	adenylate cyclase activating polypeptide 1 receptor 1	6	55.452	0.368			0.346	1.15e-05
617	ENSMUST00000044443	liver.int.EAA	Ank2	ankyrin 2, brain	3	126.922	0.46			0.346	1.15e-05
618	ENSMUST00000112139	pan.EAA/liver.int.EAA	Dync1i2	dynein cytoplasmic 1 intermediate chain 2	2	71.2117	3.638	0.252	0.00168	0.346	1.16e-05
619	ENSMUST00000112142	pan.EAA/liver.int.EAA	Dync1i2	dynein cytoplasmic 1 intermediate chain 2	2	71.2117	3.585	0.252	0.0017	0.346	1.16e-05
620	ENSMUST00000053764	liver.int.EAA	Foxo1	forkhead box O1	3	52.2683	2.484			0.346	1.16e-05
621	ENSMUST00000113444	liver.int.EAA	Agfg1	ArfGAP with FG repeats 1	1	82.8395	2.258			0.346	1.16e-05
622	ENSMUST00000003640	liver.int.EAA	Fosb	FBJ osteosarcoma oncogene B	7	19.3027	0.141			0.346	1.16e-05
623	ENSMUST00000046903	liver.int.EAA	Trim7	tripartite motif-containing 7	11	48.8375	2.094			0.346	1.16e-05
624	ENSMUST00000112140	pan.EAA/liver.int.EAA	Dync1i2	dynein cytoplasmic 1 intermediate chain 2	2	71.2117	3.591	0.252	0.00169	0.346	1.17e-05
625	ENSMUST00000112138	pan.EAA/liver.int.EAA	Dync1i2	dynein cytoplasmic 1 intermediate chain 2	2	71.2118	3.647	0.252	0.00171	0.346	1.17e-05
626	ENSMUST00000032926	liver.int.EAA	Tmem219	transmembrane protein 219	7	126.886	5.004			-0.346	1.17e-05
627	ENSMUST00000121532	liver.int.EAA	Tmem219	transmembrane protein 219	7	126.886	5.04			-0.346	1.17e-05
628	ENSMUST00000004470	liver.int.EAA	Utp20	UTP20, small subunit (SSU) processome component, homolog (yeast)	10	88.7466	1.454			0.346	1.17e-05
629	ENSMUST00000066652	liver.int.EAA	Kidins220	kinase D-interacting substrate 220	12	24.9749	2.743			0.346	1.17e-05
630	ENSMUST00000038188	liver.int.EAA	Limch1	LIM and calponin homology domains 1	5	66.9684	0.268			0.346	1.17e-05
631	ENSMUST00000103186	liver.int.EAA	Cltc	clathrin, heavy polypeptide (Hc)	11	86.6944	4.148			0.346	1.17e-05
632	ENSMUST00000105420	pan.EAA/liver.int.EAA	Adora2a	adenosine A2a receptor	10	75.3169	1.186	0.295	0.000218	0.346	1.18e-05
633	ENSMUST00000037408	liver.int.EAA	Scaper	S phase cyclin A-associated protein in the ER	9	55.5499	1.064			0.346	1.18e-05
634	ENSMUST00000178826	liver.int.EAA	Gclm	glutamate-cysteine ligase, modifier subunit	3	122.246	6.392			0.346	1.18e-05
635	ENSMUST00000060766	liver.int.EAA	Cltc	clathrin, heavy polypeptide (Hc)	11	86.6947	4.221			0.346	1.19e-05
636	ENSMUST00000149776	liver.int.EAA	Dusp16	dual specificity phosphatase 16	6	134.737	1.361			0.346	1.19e-05
637	ENSMUST00000006749	pan.EAA/liver.int.EAA	Slc4a1	solute carrier family 4 (anion exchanger), member 1	11	102.349	0.305	0.301	0.000153	0.346	1.21e-05
638	ENSMUST00000021028	pan.EAA/liver.int.EAA	Itgb3	integrin beta 3	11	104.608	1.159	0.265	0.00095	0.346	1.21e-05
639	ENSMUST00000110665	liver.int.EAA	Adal	adenosine deaminase-like	2	121.14	2.171			0.346	1.21e-05
640	ENSMUST00000112136	pan.EAA/liver.int.EAA	Dync1i2	dynein cytoplasmic 1 intermediate chain 2	2	71.212	3.633	0.254	0.00156	0.345	1.23e-05
641	ENSMUST00000085245	liver.int.EAA	Slc39a9	solute carrier family 39 (zinc transporter), member 9	12	80.6442	3.158			0.345	1.23e-05
642	ENSMUST00000023610	liver.int.EAA	Adamts1	a disintegrin-like and metallopeptidase (reprolysin type) with thrombospondin type 1 motif, 1	16	85.7938	1.555			0.345	1.24e-05
643	ENSMUST00000120007	liver.int.EAA	Tmem219	transmembrane protein 219	7	126.886	4.799			-0.345	1.25e-05
644	ENSMUST00000064391	liver.int.EAA	Cpne8	copine VIII	15	90.4875	0.93			0.345	1.27e-05
645	ENSMUST00000053183	liver.int.EAA	Arf3	ADP-ribosylation factor 3	15	98.7376	4.532			0.345	1.27e-05
646	ENSMUST00000074733	liver.int.EAA	2022-09-11	septin 11	5	1900-04-02 02:14:32	1.985			0.345	1.27e-05
647	ENSMUST00000112144	pan.EAA/liver.int.EAA	Dync1i2	dynein cytoplasmic 1 intermediate chain 2	2	71.212	3.628	0.254	0.00156	0.345	1.28e-05
648	ENSMUST00000184365	liver.int.EAA	Gm27597	predicted gene, 27597	11	98.0294	9.822			-0.345	1.28e-05
649	ENSMUST00000040219	liver.int.EAA	L3mbtl3	l(3)mbt-like 3 (Drosophila)	10	26.2745	1.144			0.345	1.28e-05
650	ENSMUST00000087241	liver.int.EAA	Shisa3	shisa family member 3	5	67.6079	0.165			0.345	1.28e-05
651	ENSMUST00000107772	liver.int.EAA	Tstd2	thiosulfate sulfurtransferase (rhodanese)-like domain containing 2	4	46.1147	2.322			0.345	1.29e-05
652	ENSMUST00000176745	liver.int.EAA	Cux1	cut-like homeobox 1	5	136.248	2.76			0.345	1.3e-05
653	ENSMUST00000103121	pan.EAA/liver.int.EAA	D630003M21Rik	RIKEN cDNA D630003M21 gene	2	158.183	0.395	0.294	0.000229	0.344	1.31e-05
654	ENSMUST00000121797	liver.int.EAA	Kdf1	keratinocyte differentiation factor 1	4	133.519	1.754			-0.344	1.31e-05
655	ENSMUST00000042296	liver.int.EAA	Qk	quaking	17	10.2102	2.329			0.344	1.31e-05
656	ENSMUST00000045368	liver.int.EAA	Fam206a	family with sequence similarity 206, member A	4	56.8023	0.744			0.344	1.31e-05
657	ENSMUST00000035430	pan.EAA/liver.int.EAA	Dars2	aspartyl-tRNA synthetase 2 (mitochondrial)	1	161.041	1.874	0.293	0.000242	0.344	1.32e-05
658	ENSMUST00000081710	pan.EAA/liver.int.EAA	Dync1i2	dynein cytoplasmic 1 intermediate chain 2	2	71.2118	3.598	0.253	0.00157	0.344	1.32e-05
659	ENSMUST00000176216	liver.int.EAA	Cux1	cut-like homeobox 1	5	136.248	2.763			0.344	1.33e-05
660	ENSMUST00000097368	liver.int.EAA	Pigq	phosphatidylinositol glycan anchor biosynthesis, class Q	17	25.9264	3.547			0.344	1.35e-05
661	ENSMUST00000033763	liver.int.EAA	Naa10	N(alpha)-acetyltransferase 10, NatA catalytic subunit	X	73.9169	4.84			-0.344	1.36e-05
662	ENSMUST00000202217	liver.int.EAA	2022-09-11	septin 11	5	1900-04-02 02:14:44	2.319			0.344	1.36e-05
663	ENSMUST00000026823	liver.int.EAA	Pigq	phosphatidylinositol glycan anchor biosynthesis, class Q	17	25.9264	3.572			0.344	1.36e-05
664	ENSMUST00000082152	liver.int.EAA	Ube2o	ubiquitin-conjugating enzyme E2O	11	116.538	1.919			0.344	1.37e-05
665	ENSMUST00000028499	liver.int.EAA	Itgav	integrin alpha V	2	83.7244	1.903			0.344	1.37e-05
666	ENSMUST00000100721	pan.EAA/liver.int.EAA	Vstm4	V-set and transmembrane domain containing 4	14	32.8568	0.815	0.292	0.000256	0.343	1.38e-05
667	ENSMUST00000165095	liver.int.EAA	Pacsin2	protein kinase C and casein kinase substrate in neurons 2	15	83.3756	3.842			0.343	1.39e-05
668	ENSMUST00000105519	liver.int.EAA	L3mbtl3	l(3)mbt-like 3 (Drosophila)	10	26.2745	1.155			0.343	1.39e-05
669	ENSMUST00000203673	liver.int.EAA	C2cd5	C2 calcium-dependent domain containing 5	6	143.012	1.027			0.343	1.4e-05
670	ENSMUST00000171436	liver.int.EAA	Pacsin2	protein kinase C and casein kinase substrate in neurons 2	15	83.3756	3.858			0.343	1.4e-05
671	ENSMUST00000160967	pan.EAA/liver.int.EAA	Gm16567	predicted gene 16567	6	124.531	7.305	0.255	0.00146	0.343	1.41e-05
672	ENSMUST00000053016	liver.int.EAA	Pou4f1	POU domain, class 4, transcription factor 1	14	104.462	0.061			0.343	1.41e-05
673	ENSMUST00000014457	liver.int.EAA	Cox6c	cytochrome c oxidase subunit VIc	15	35.932	7.981			-0.343	1.42e-05
674	ENSMUST00000114391	liver.int.EAA	Naa10	N(alpha)-acetyltransferase 10, NatA catalytic subunit	X	73.9169	5.021			-0.343	1.42e-05
675	ENSMUST00000084488	liver.int.EAA	Dock1	dedicator of cytokinesis 1	7	134.671	1.639			0.343	1.42e-05
676	ENSMUST00000171284	liver.int.EAA	Mettl4	methyltransferase like 4	17	94.7271	1.268			0.343	1.43e-05
677	ENSMUST00000164195	liver.int.EAA	Pde7b	phosphodiesterase 7B	10	20.4071	1.241			0.343	1.43e-05
678	ENSMUST00000159990	liver.int.EAA	Poc1b	POC1 centriolar protein homolog B (Chlamydomonas)	10	99.1071	1.414			0.343	1.43e-05
679	ENSMUST00000201421	liver.int.EAA	2022-09-11	septin 11	5	1900-04-02 02:14:40	1.789			0.343	1.43e-05
680	ENSMUST00000039926	pan.EAA/liver.int.EAA	Dusp8	dual specificity phosphatase 8	7	142.079	0.311	0.282	0.000422	0.343	1.44e-05
681	ENSMUST00000114666	pan.EAA/liver.int.EAA	Atp6v1a	ATPase, H+ transporting, lysosomal V1 subunit A	16	44.0854	3.49	0.241	0.00272	0.343	1.44e-05
682	ENSMUST00000114389	liver.int.EAA	Naa10	N(alpha)-acetyltransferase 10, NatA catalytic subunit	X	73.9169	4.765			-0.343	1.44e-05
683	ENSMUST00000112925	liver.int.EAA	Ift122	intraflagellar transport 122	6	115.853	0.823			0.343	1.44e-05
684	ENSMUST00000029769	liver.int.EAA	Gclm	glutamate-cysteine ligase, modifier subunit	3	122.246	4.854			0.343	1.44e-05
685	ENSMUST00000153512	liver.int.EAA	Cox6c	cytochrome c oxidase subunit VIc	15	35.932	7.433			-0.343	1.45e-05
686	ENSMUST00000047697	liver.int.EAA	Trim17	tripartite motif-containing 17	11	58.9547	1.066			0.343	1.45e-05
687	ENSMUST00000107033	liver.int.EAA	Inadl	InaD-like (Drosophila)	4	98.3959	1.155			0.343	1.45e-05
688	ENSMUST00000114387	liver.int.EAA	Naa10	N(alpha)-acetyltransferase 10, NatA catalytic subunit	X	73.9169	4.836			-0.343	1.46e-05
689	ENSMUST00000067543	liver.int.EAA	Trib1	tribbles 1	15	59.6483	3.826			0.343	1.46e-05
690	ENSMUST00000038234	liver.int.EAA	Ift122	intraflagellar transport 122	6	115.854	0.833			0.343	1.46e-05
691	ENSMUST00000059817	liver.int.EAA	Zfp367	zinc finger protein 367	13	64.133	1.778			0.342	1.47e-05
692	ENSMUST00000077338	liver.int.EAA	Atp5sl	ATP5S-like	7	25.6194	4.348			-0.342	1.48e-05
693	ENSMUST00000081497	liver.int.EAA	Pop5	processing of precursor 5, ribonuclease P/MRP family (S. cerevisiae)	5	115.236	4.722			-0.342	1.48e-05
694	ENSMUST00000119269	liver.int.EAA	Ogfod2	2-oxoglutarate and iron-dependent oxygenase domain containing 2	5	124.112	4.151			-0.342	1.48e-05
695	ENSMUST00000118134	liver.int.EAA	Ttc13	tetratricopeptide repeat domain 13	8	124.671	2.936			0.342	1.5e-05
696	ENSMUST00000085774	pan.EAA/liver.int.EAA	Sdk1	sidekick homolog 1 (chicken)	5	141.241	0.034	0.305	0.000124	0.342	1.51e-05
697	ENSMUST00000015427	liver.int.EAA	Fam3a	family with sequence similarity 3, member A	X	74.3848	3.36			0.342	1.51e-05
698	ENSMUST00000114960	pan.EAA/liver.int.EAA	Kalrn	kalirin, RhoGEF kinase	16	34.152	0.146	0.258	0.00131	0.342	1.52e-05
699	ENSMUST00000119993	pan.EAA/liver.int.EAA	Tspan5	tetraspanin 5	3	138.81	0.366	0.243	0.0025	0.342	1.52e-05
700	ENSMUST00000119422	liver.int.EAA	4930402H24Rik	RIKEN cDNA 4930402H24 gene	2	130.709	1.777			0.342	1.52e-05
701	ENSMUST00000202747	liver.int.EAA	Tbl1xr1	transducin (beta)-like 1X-linked receptor 1	3	22.0767	1.841			0.342	1.52e-05
702	ENSMUST00000190040	pan.EAA/liver.int.EAA	Gm28523	predicted gene 28523	6	141.247	0.077	0.274	0.000599	0.342	1.56e-05
703	ENSMUST00000041614	liver.int.EAA	Ttc13	tetratricopeptide repeat domain 13	8	124.671	2.966			0.341	1.56e-05
704	ENSMUST00000096191	liver.int.EAA	Vps8	vacuolar protein sorting 8 homolog (S. cerevisiae)	16	21.4231	1.069			0.341	1.56e-05
705	ENSMUST00000117624	liver.int.EAA	Ttc13	tetratricopeptide repeat domain 13	8	124.671	2.949			0.341	1.58e-05
706	ENSMUST00000115321	liver.int.EAA	Zfp800	zinc finger protein 800	6	28.2414	1.364			0.341	1.58e-05
707	ENSMUST00000113035	pan.EAA/liver.int.EAA	Uhrf1	ubiquitin-like, containing PHD and RING finger domains, 1	17	56.3043	0.392	0.299	0.000176	0.341	1.59e-05
708	ENSMUST00000089655	pan.EAA/liver.int.EAA	Kalrn	kalirin, RhoGEF kinase	16	34.152	0.145	0.257	0.00132	0.341	1.59e-05
709	ENSMUST00000002881	liver.int.EAA	Nudt14	nudix (nucleoside diphosphate linked moiety X)-type motif 14	12	112.935	4.147			-0.341	1.59e-05
710	ENSMUST00000166542	liver.int.EAA	Hivep3	human immunodeficiency virus type I enhancer binding protein 3	4	120.094	0.145			0.341	1.59e-05
711	ENSMUST00000023478	liver.int.EAA	Igsf11	immunoglobulin superfamily, member 11	16	38.9023	3.437			0.341	1.61e-05
712	ENSMUST00000118410	liver.int.EAA	Impa1	inositol (myo)-1(or 4)-monophosphatase 1	3	10.314	3.961			0.341	1.61e-05
713	ENSMUST00000034111	liver.int.EAA	Slc10a7	solute carrier family 10 (sodium/bile acid cotransporter family), member 7	8	78.5093	1.376			0.341	1.61e-05
714	ENSMUST00000080492	liver.int.EAA	Rpl36	ribosomal protein L36	17	56.6134	8.379			-0.341	1.62e-05
715	ENSMUST00000047242	liver.int.EAA	Traf3ip1	TRAF3 interacting protein 1	1	91.4947	1.664			0.341	1.62e-05
716	ENSMUST00000113039	pan.EAA/liver.int.EAA	Uhrf1	ubiquitin-like, containing PHD and RING finger domains, 1	17	56.3043	0.394	0.299	0.00017	0.341	1.63e-05
717	ENSMUST00000025014	liver.int.EAA	Mrpl28	mitochondrial ribosomal protein L28	17	26.1235	5.243			-0.341	1.63e-05
718	ENSMUST00000117150	liver.int.EAA	Phtf1	putative homeodomain transcription factor 1	3	103.968	1.181			0.341	1.63e-05
719	ENSMUST00000033498	liver.int.EAA	Timm17b	translocase of inner mitochondrial membrane 17b	X	7.89936	4.311			-0.341	1.64e-05
720	ENSMUST00000203187	liver.int.EAA	C2cd5	C2 calcium-dependent domain containing 5	6	143.012	1.071			0.341	1.64e-05
721	ENSMUST00000050625	pan.EAA/liver.int.EAA	Sema5b	sema domain, seven thrombospondin repeats (type 1 and type 1-like), transmembrane domain (TM) and short cytoplasmic domain, (semaphorin) 5B	16	35.5416	1.225	0.281	0.000441	0.341	1.65e-05
722	ENSMUST00000167323	liver.int.EAA	Apold1	apolipoprotein L domain containing 1	6	134.982	0.579			0.341	1.65e-05
723	ENSMUST00000030336	pan.EAA/liver.int.EAA	Tnfrsf1b	tumor necrosis factor receptor superfamily, member 1b	4	145.213	3.135	0.262	0.00106	0.34	1.67e-05
724	ENSMUST00000039761	liver.int.EAA	Rwdd3	RWD domain containing 3	3	121.156	2.409			-0.34	1.67e-05
725	ENSMUST00000063661	liver.int.EAA	Atp6v1a	ATPase, H+ transporting, lysosomal V1 subunit A	16	44.0856	3.548			0.34	1.67e-05
726	ENSMUST00000020830	liver.int.EAA	Mfap3	microfibrillar-associated protein 3	11	57.5187	1.606			0.34	1.67e-05
727	ENSMUST00000003569	pan.EAA/liver.int.EAA	Inmt	indolethylamine N-methyltransferase	6	55.1706	8.339	-0.239	0.00291	-0.34	1.68e-05
728	ENSMUST00000171696	liver.int.EAA	Ttpal	tocopherol (alpha) transfer protein-like	2	163.602	1.841			0.34	1.68e-05
729	ENSMUST00000107034	liver.int.EAA	Inadl	InaD-like (Drosophila)	4	98.3959	1.413			0.34	1.68e-05
730	ENSMUST00000026222	liver.int.EAA	Ndufb8	NADH dehydrogenase (ubiquinone) 1 beta subcomplex 8	19	44.5502	7.059			-0.34	1.7e-05
731	ENSMUST00000023056	liver.int.EAA	Deptor	DEP domain containing MTOR-interacting protein	15	55.1334	3.699			0.34	1.7e-05
732	ENSMUST00000067880	liver.int.EAA	Adam10	a disintegrin and metallopeptidase domain 10	9	70.679	2.737			0.34	1.7e-05
733	ENSMUST00000111956	pan.EAA/liver.int.EAA	Arhgap22	Rho GTPase activating protein 22	14	33.2168	0.269	0.348	1.02e-05	0.34	1.71e-05
734	ENSMUST00000094805	pan.EAA/liver.int.EAA	Ccdc8	coiled-coil domain containing 8	7	16.9927	0.282	0.263	0.00102	0.34	1.72e-05
735	ENSMUST00000120756	pan.EAA/liver.int.EAA	Sema5b	sema domain, seven thrombospondin repeats (type 1 and type 1-like), transmembrane domain (TM) and short cytoplasmic domain, (semaphorin) 5B	16	35.5414	1.179	0.281	0.000438	0.34	1.73e-05
736	ENSMUST00000170781	liver.int.EAA	Rwdd3	RWD domain containing 3	3	121.156	2.437			-0.34	1.74e-05
737	ENSMUST00000021038	pan.EAA/liver.int.EAA	Mrc2	mannose receptor, C type 2	11	105.293	0.468	0.259	0.00123	0.34	1.75e-05
738	ENSMUST00000114954	pan.EAA/liver.int.EAA	Kalrn	kalirin, RhoGEF kinase	16	34.152	0.148	0.242	0.00262	0.34	1.75e-05
739	ENSMUST00000161154	pan.EAA/liver.int.EAA	Wars	tryptophanyl-tRNA synthetase	12	108.86	3.052	0.256	0.0014	0.34	1.76e-05
740	ENSMUST00000080813	liver.int.EAA	Rps17	ribosomal protein S17	7	81.3427	8.364			-0.339	1.76e-05
741	ENSMUST00000105721	liver.int.EAA	Gm13152	predicted gene 13152	4	147.492	0.339			0.339	1.76e-05
742	ENSMUST00000086247	pan.EAA/liver.int.EAA	P2rx7	purinergic receptor P2X, ligand-gated ion channel, 7	5	122.644	0.558	0.274	0.000598	0.339	1.77e-05
743	ENSMUST00000166615	liver.int.EAA	Wwp2	WW domain containing E3 ubiquitin protein ligase 2	8	107.436	2.812			0.339	1.77e-05
744	ENSMUST00000108193	liver.int.EAA	Polr2i	polymerase (RNA) II (DNA directed) polypeptide I	7	30.2323	5.172			-0.339	1.78e-05
745	ENSMUST00000056177	liver.int.EAA	Pacsin2	protein kinase C and casein kinase substrate in neurons 2	15	83.3761	4.176			0.339	1.78e-05
746	ENSMUST00000108849	liver.int.EAA	Mfap3	microfibrillar-associated protein 3	11	57.5187	1.607			0.339	1.78e-05
747	ENSMUST00000115358	liver.int.EAA	Cadps2	Ca2+-dependent activator protein for secretion 2	6	23.2628	1.89			0.339	1.78e-05
748	ENSMUST00000163871	liver.int.EAA	Cadps2	Ca2+-dependent activator protein for secretion 2	6	23.2628	1.864			0.339	1.79e-05
749	ENSMUST00000021375	liver.int.EAA	Sec23a	SEC23A (S. cerevisiae)	12	58.9584	4.064			0.339	1.81e-05
750	ENSMUST00000196316	pan.EAA/liver.int.EAA	Ccna2	cyclin A2	3	36.566	0.351	0.305	0.000124	0.339	1.83e-05
751	ENSMUST00000025602	liver.int.EAA	Gna14	guanine nucleotide binding protein, alpha 14	19	16.4357	1.024			0.339	1.83e-05
752	ENSMUST00000052700	pan.EAA/liver.int.EAA	Ffar1	free fatty acid receptor 1	7	30.8574	0.038	0.283	0.000402	0.339	1.84e-05
753	ENSMUST00000169826	liver.int.EAA	Rps24	ribosomal protein S24	14	24.4907	7.433			-0.339	1.84e-05
754	ENSMUST00000112706	liver.int.EAA	Serpinb8	serine (or cysteine) peptidase inhibitor, clade B, member 8	1	107.59	1.592			0.339	1.84e-05
755	ENSMUST00000113038	pan.EAA/liver.int.EAA	Uhrf1	ubiquitin-like, containing PHD and RING finger domains, 1	17	56.3034	0.393	0.297	0.000193	0.339	1.85e-05
756	ENSMUST00000114953	pan.EAA/liver.int.EAA	Kalrn	kalirin, RhoGEF kinase	16	34.1521	0.147	0.241	0.00272	0.339	1.85e-05
757	ENSMUST00000112384	liver.int.EAA	Rps24	ribosomal protein S24	14	24.4907	8.262			-0.339	1.86e-05
758	ENSMUST00000063704	liver.int.EAA	Gm13152	predicted gene 13152	4	147.508	0.373			0.339	1.86e-05
759	ENSMUST00000053771	liver.int.EAA	Phkb	phosphorylase kinase beta	8	85.841	1.862			0.339	1.86e-05
760	ENSMUST00000161825	liver.int.EAA	Gfm2	G elongation factor, mitochondrial 2	13	97.138	3			0.338	1.88e-05
761	ENSMUST00000021466	pan.EAA/liver.int.EAA	Atl1	atlastin GTPase 1	12	69.8931	0.415	0.252	0.00169	0.338	1.89e-05
762	ENSMUST00000090685	pan.EAA/liver.int.EAA	Phtf1	putative homeodomain transcription factor 1	3	103.968	1.208	0.24	0.00284	0.338	1.89e-05
763	ENSMUST00000026539	liver.int.EAA	Fuom	fucose mutarotase	7	140.099	4.675			-0.338	1.89e-05
764	ENSMUST00000079403	liver.int.EAA	Athl1	ATH1, acid trehalase-like 1 (yeast)	7	140.942	3.702			0.338	1.89e-05
765	ENSMUST00000053768	liver.int.EAA	Stxbp6	syntaxin binding protein 6 (amisyn)	12	44.8552	2.641			0.338	1.89e-05
766	ENSMUST00000088585	pan.EAA/liver.int.EAA	Sulf1	sulfatase 1	1	12.7185	0.245	0.243	0.0025	0.338	1.9e-05
767	ENSMUST00000037785	liver.int.EAA	Ncam2	neural cell adhesion molecule 2	16	81.2007	0.234			0.338	1.9e-05
768	ENSMUST00000171404	liver.int.EAA	Gtf3c4	general transcription factor IIIC, polypeptide 4	2	28.8223	2.152			0.338	1.9e-05
769	ENSMUST00000115361	liver.int.EAA	Cadps2	Ca2+-dependent activator protein for secretion 2	6	23.2628	1.94			0.338	1.91e-05
770	ENSMUST00000021239	liver.int.EAA	Lrrc59	leucine rich repeat containing 59	11	94.6298	4.995			0.338	1.91e-05
771	ENSMUST00000079758	liver.int.EAA	Aplp2	amyloid beta (A4) precursor-like protein 2	9	31.1496	6.317			0.338	1.91e-05
772	ENSMUST00000073029	pan.EAA/liver.int.EAA	Fancc	Fanconi anemia, complementation group C	13	63.3047	0.82	0.257	0.00134	0.338	1.92e-05
773	ENSMUST00000024470	liver.int.EAA	Ogfod2	2-oxoglutarate and iron-dependent oxygenase domain containing 2	5	124.112	4.063			-0.338	1.92e-05
774	ENSMUST00000045229	liver.int.EAA	Tmco3	transmembrane and coiled-coil domains 3	8	13.288	1.336			0.338	1.92e-05
775	ENSMUST00000030303	liver.int.EAA	Cyp2j6	cytochrome P450, family 2, subfamily j, polypeptide 6	4	96.5161	3.421			0.338	1.93e-05
776	ENSMUST00000181481	liver.int.EAA	Gm26582	predicted gene, 26582	5	92.0431	3.139			0.338	1.94e-05
777	ENSMUST00000186302	liver.int.EAA	Agfg1	ArfGAP with FG repeats 1	1	82.8397	2.31			0.338	1.94e-05
778	ENSMUST00000031795	liver.int.EAA	Fkbp9	FK506 binding protein 9	6	56.8321	3.703			0.338	1.94e-05
779	ENSMUST00000004214	pan.EAA/liver.int.EAA	Cacna1e	calcium channel, voltage-dependent, R type, alpha 1E subunit	1	154.393	0.024	0.273	0.000639	0.338	1.95e-05
780	ENSMUST00000078676	liver.int.EAA	Uqcrh	ubiquinol-cytochrome c reductase hinge protein	4	116.067	7.306			-0.338	1.95e-05
781	ENSMUST00000108196	pan.EAA/liver.int.EAA	Capns1	calpain, small subunit 1	7	30.187	6.232	0.316	6.83e-05	0.338	1.96e-05
782	ENSMUST00000027780	liver.int.EAA	Acbd3	acyl-Coenzyme A binding domain containing 3	1	180.726	2.771			0.338	1.96e-05
783	ENSMUST00000018122	liver.int.EAA	Cadps2	Ca2+-dependent activator protein for secretion 2	6	23.2628	1.906			0.338	1.96e-05
784	ENSMUST00000037117	liver.int.EAA	Gtf3c4	general transcription factor IIIC, polypeptide 4	2	28.8223	2.18			0.338	1.96e-05
785	ENSMUST00000090824	liver.int.EAA	Zak	sterile alpha motif and leucine zipper containing kinase AZK	2	72.2856	1.526			0.338	1.96e-05
786	ENSMUST00000034140	liver.int.EAA	Itfg1	integrin alpha FG-GAP repeat containing 1	8	85.7176	3.734			0.338	1.97e-05
787	ENSMUST00000001845	pan.EAA/liver.int.EAA	Capns1	calpain, small subunit 1	7	30.1869	5.871	0.316	6.94e-05	0.338	1.98e-05
788	ENSMUST00000001258	pan.EAA/liver.int.EAA	Uhrf1	ubiquitin-like, containing PHD and RING finger domains, 1	17	56.3033	0.385	0.298	0.000186	0.337	1.99e-05
789	ENSMUST00000003521	liver.int.EAA	Rps11	ribosomal protein S11	7	45.1224	8.269			-0.337	1.99e-05
790	ENSMUST00000167918	liver.int.EAA	G3bp2	GTPase activating protein (SH3 domain) binding protein 2	5	92.0521	3.586			0.337	1.99e-05
791	ENSMUST00000187541	pan.EAA/liver.int.EAA	Cacna1e	calcium channel, voltage-dependent, R type, alpha 1E subunit	1	154.391	0.026	0.29	0.000271	0.337	2e-05
792	ENSMUST00000106643	liver.int.EAA	Parva	parvin, alpha	7	112.428	4.255			0.337	2e-05
793	ENSMUST00000204084	liver.int.EAA	Ndufa4	NADH dehydrogenase (ubiquinone) 1 alpha subcomplex, 4	6	11.9004	8.636			-0.337	2.01e-05
794	ENSMUST00000114706	liver.int.EAA	Igsf11	immunoglobulin superfamily, member 11	16	38.9015	3.339			0.337	2.01e-05
795	ENSMUST00000025354	liver.int.EAA	Pggt1b	protein geranylgeranyltransferase type I, beta subunit	18	46.2399	1.743			0.337	2.01e-05
796	ENSMUST00000085255	liver.int.EAA	Cyfip1	cytoplasmic FMR1 interacting protein 1	7	55.8422	3.229			0.337	2.01e-05
797	ENSMUST00000169079	liver.int.EAA	Lrrcc1	leucine rich repeat and coiled-coil domain containing 1	3	14.5338	0.421			0.337	2.02e-05
798	ENSMUST00000031637	liver.int.EAA	Ndufa4	NADH dehydrogenase (ubiquinone) 1 alpha subcomplex, 4	6	11.9004	8.442			-0.337	2.03e-05
799	ENSMUST00000204978	liver.int.EAA	Ndufa4	NADH dehydrogenase (ubiquinone) 1 alpha subcomplex, 4	6	11.9003	8.062			-0.337	2.03e-05
800	ENSMUST00000204714	liver.int.EAA	Ndufa4	NADH dehydrogenase (ubiquinone) 1 alpha subcomplex, 4	6	11.9004	8.493			-0.337	2.03e-05
801	ENSMUST00000189341	liver.int.EAA	Traf3ip1	TRAF3 interacting protein 1	1	91.4946	1.886			0.337	2.03e-05
802	ENSMUST00000029632	liver.int.EAA	Lrat	lecithin-retinol acyltransferase (phosphatidylcholine-retinol-O-acyltransferase)	3	82.8926	1.801			0.337	2.04e-05
803	ENSMUST00000026613	liver.int.EAA	Gusb	glucuronidase, beta	5	129.989	3.509			0.337	2.04e-05
804	ENSMUST00000113127	liver.int.EAA	G3bp2	GTPase activating protein (SH3 domain) binding protein 2	5	92.0522	3.608			0.337	2.05e-05
805	ENSMUST00000164378	liver.int.EAA	G3bp2	GTPase activating protein (SH3 domain) binding protein 2	5	92.0537	3.323			0.337	2.05e-05
806	ENSMUST00000041284	liver.int.EAA	Inadl	InaD-like (Drosophila)	4	98.3958	1.398			0.337	2.05e-05
807	ENSMUST00000041369	liver.int.EAA	Socs5	suppressor of cytokine signaling 5	17	87.1077	1.305			0.337	2.05e-05
808	ENSMUST00000006496	liver.int.EAA	Rps9	ribosomal protein S9	7	3.70399	8.643			-0.337	2.07e-05
809	ENSMUST00000108625	liver.int.EAA	Rps9	ribosomal protein S9	7	3.70405	8.37			-0.337	2.07e-05
810	ENSMUST00000082134	liver.int.EAA	Rps16	ribosomal protein S16	7	28.3507	8.484			-0.337	2.08e-05
811	ENSMUST00000108623	liver.int.EAA	Rps9	ribosomal protein S9	7	3.70404	7.817			-0.337	2.08e-05
812	ENSMUST00000049863	liver.int.EAA	Pofut1	protein O-fucosyltransferase 1	2	153.242	2.052			0.337	2.08e-05
813	ENSMUST00000020984	pan.EAA/liver.int.EAA	Adcy3	adenylate cyclase 3	12	4.13415	0.605	0.243	0.00251	0.337	2.1e-05
814	ENSMUST00000127756	liver.int.EAA	Adcy3	adenylate cyclase 3	12	4.1334	0.606			0.336	2.11e-05
815	ENSMUST00000028771	pan.EAA/liver.int.EAA	Nusap1	nucleolar and spindle associated protein 1	2	119.619	0.275	0.278	0.000497	0.336	2.12e-05
816	ENSMUST00000072634	liver.int.EAA	Aplp2	amyloid beta (A4) precursor-like protein 2	9	31.1496	6.306			0.336	2.12e-05
817	ENSMUST00000068225	pan.EAA/liver.int.EAA	Nusap1	nucleolar and spindle associated protein 1	2	119.618	0.297	0.288	0.000299	0.336	2.13e-05
818	ENSMUST00000191670	liver.int.EAA	Impa1	inositol (myo)-1(or 4)-monophosphatase 1	3	10.3149	4.742			0.336	2.13e-05
819	ENSMUST00000118242	liver.int.EAA	Limch1	LIM and calponin homology domains 1	5	66.7459	0.282			0.336	2.14e-05
820	ENSMUST00000075657	liver.int.EAA	Ap3s2	adaptor-related protein complex 3, sigma 2 subunit	7	79.8753	2.355			0.336	2.14e-05
821	ENSMUST00000008036	pan.EAA/liver.int.EAA	Rplp1	ribosomal protein, large, P1	9	61.9133	9.265	-0.26	0.00116	-0.336	2.15e-05
822	ENSMUST00000152065	liver.int.EAA	Adcy3	adenylate cyclase 3	12	4.1334	0.603			0.336	2.15e-05
823	ENSMUST00000045029	liver.int.EAA	Pigk	phosphatidylinositol glycan anchor biosynthesis, class K	3	152.714	3.363			0.336	2.16e-05
824	ENSMUST00000114791	liver.int.EAA	Rsu1	Ras suppressor protein 1	2	13.0768	3.434			0.336	2.16e-05
825	ENSMUST00000076961	liver.int.EAA	Rabac1	Rab acceptor 1 (prenylated)	7	24.9697	6.917			-0.336	2.17e-05
826	ENSMUST00000111307	liver.int.EAA	Gusb	glucuronidase, beta	5	130	3.163			0.336	2.17e-05
827	ENSMUST00000170629	pan.EAA/liver.int.EAA	Gtse1	G two S phase expressed protein 1	15	85.8597	0.372	0.252	0.00165	0.336	2.18e-05
828	ENSMUST00000032629	liver.int.EAA	Cyfip1	cytoplasmic FMR1 interacting protein 1	7	55.8421	3.15			0.336	2.18e-05
829	ENSMUST00000032441	liver.int.EAA	Ccdc91	coiled-coil domain containing 91	6	147.476	3.443			0.336	2.18e-05
830	ENSMUST00000103122	liver.int.EAA	Tgm2	transglutaminase 2, C polypeptide	2	158.116	5.714			0.336	2.18e-05
831	ENSMUST00000168445	liver.int.EAA	Cyb561a3	cytochrome b561 family, member A3	19	10.5775	2.976			0.336	2.18e-05
832	ENSMUST00000202308	liver.int.EAA	2022-09-11	septin 11	5	1900-04-02 02:14:34	2.079			0.336	2.19e-05
833	ENSMUST00000142913	liver.int.EAA	Cadps2	Ca2+-dependent activator protein for secretion 2	6	23.2628	1.937			0.336	2.19e-05
834	ENSMUST00000023352	liver.int.EAA	Prkdc	protein kinase, DNA activated, catalytic polypeptide	16	15.6379	0.517			0.336	2.19e-05
835	ENSMUST00000022170	liver.int.EAA	Gfm2	G elongation factor, mitochondrial 2	13	97.138	3.709			0.336	2.19e-05
836	ENSMUST00000171267	pan.EAA/liver.int.EAA	Cd180	CD180 antigen	13	102.694	0.255	0.293	0.000237	0.336	2.2e-05
837	ENSMUST00000187899	liver.int.EAA	Agfg1	ArfGAP with FG repeats 1	1	82.8397	2.403			0.336	2.21e-05
838	ENSMUST00000166458	liver.int.EAA	Cadps2	Ca2+-dependent activator protein for secretion 2	6	23.2628	1.922			0.336	2.21e-05
839	ENSMUST00000169094	liver.int.EAA	G3bp2	GTPase activating protein (SH3 domain) binding protein 2	5	92.0537	3.465			0.336	2.21e-05
840	ENSMUST00000109594	liver.int.EAA	Slc1a4	solute carrier family 1 (glutamate/neutral amino acid transporter), member 4	11	20.3022	1.643			0.336	2.22e-05
841	ENSMUST00000107689	pan.EAA/liver.int.EAA	Fhdc1	FH2 domain containing 1	3	84.4422	0.126	0.297	0.000198	0.336	2.24e-05
842	ENSMUST00000004634	liver.int.EAA	Slc1a4	solute carrier family 1 (glutamate/neutral amino acid transporter), member 4	11	20.3022	1.656			0.335	2.24e-05
843	ENSMUST00000055425	pan.EAA/liver.int.EAA	Phtf1	putative homeodomain transcription factor 1	3	103.968	1.214	0.25	0.00183	0.335	2.25e-05
844	ENSMUST00000108784	pan.EAA/liver.int.EAA	Mrpl55	mitochondrial ribosomal protein L55	11	59.2025	4.32	-0.253	0.00164	-0.335	2.26e-05
845	ENSMUST00000020576	liver.int.EAA	Ccng1	cyclin G1	11	40.7486	3.18			0.335	2.27e-05
846	ENSMUST00000182852	liver.int.EAA	Zfp532	zinc finger protein 532	18	65.5829	0.475			0.335	2.27e-05
847	ENSMUST00000161487	pan.EAA/liver.int.EAA	Ppm1h	protein phosphatase 1H (PP2C domain containing)	10	122.679	0.753	0.326	4e-05	0.335	2.28e-05
848	ENSMUST00000177608	pan.EAA/liver.int.EAA	Sulf1	sulfatase 1	1	12.6923	0.221	0.239	0.00298	0.335	2.28e-05
849	ENSMUST00000114949	liver.int.EAA	Kalrn	kalirin, RhoGEF kinase	16	34.1534	0.181			0.335	2.28e-05
850	ENSMUST00000002172	liver.int.EAA	Acp2	acid phosphatase 2, lysosomal	2	91.2029	3.636			0.335	2.28e-05
851	ENSMUST00000005532	liver.int.EAA	Nid1	nidogen 1	13	13.4376	2.104			0.335	2.28e-05
852	ENSMUST00000062211	liver.int.EAA	Gpat2	glycerol-3-phosphate acyltransferase 2, mitochondrial	2	127.425	0.867			0.335	2.29e-05
853	ENSMUST00000111773	liver.int.EAA	Rbms3	RNA binding motif, single stranded interacting protein	9	116.573	0.499			0.335	2.3e-05
854	ENSMUST00000190052	liver.int.EAA	Agfg1	ArfGAP with FG repeats 1	1	82.8397	2.177			0.335	2.3e-05
855	ENSMUST00000163845	liver.int.EAA	Cyfip1	cytoplasmic FMR1 interacting protein 1	7	55.8423	3.241			0.335	2.3e-05
856	ENSMUST00000111775	liver.int.EAA	Xpr1	xenotropic and polytropic retrovirus receptor 1	1	155.279	2.334			0.335	2.31e-05
857	ENSMUST00000117269	liver.int.EAA	Traf3	TNF receptor-associated factor 3	12	111.166	1.465			0.335	2.31e-05
858	ENSMUST00000058829	liver.int.EAA	Neto1	neuropilin (NRP) and tolloid (TLL)-like 1	18	86.395	0.151			0.335	2.32e-05
859	ENSMUST00000061639	liver.int.EAA	Spty2d1	SPT2, Suppressor of Ty, domain containing 1 (S. cerevisiae)	7	46.9904	1.864			0.335	2.32e-05
860	ENSMUST00000028059	liver.int.EAA	Rsu1	Ras suppressor protein 1	2	13.077	3.484			0.335	2.33e-05
861	ENSMUST00000173131	liver.int.EAA	Gm20537	predicted gene 20537	9	88.4074	3.274			0.335	2.33e-05
862	ENSMUST00000199088	liver.int.EAA	Antxr2	anthrax toxin receptor 2	5	97.9154	2.171			0.335	2.34e-05
863	ENSMUST00000033053	pan.EAA/liver.int.EAA	Itgax	integrin alpha X	7	128.13	0.674	0.372	2.16e-06	0.335	2.35e-05
864	ENSMUST00000101164	liver.int.EAA	Limch1	LIM and calponin homology domains 1	5	66.7458	0.283			0.335	2.35e-05
865	ENSMUST00000108192	liver.int.EAA	Polr2i	polymerase (RNA) II (DNA directed) polypeptide I	7	30.2323	5.13			-0.335	2.36e-05
866	ENSMUST00000105907	liver.int.EAA	Tmem222	transmembrane protein 222	4	133.266	3.907			-0.335	2.36e-05
867	ENSMUST00000100709	liver.int.EAA	Setd8	SET domain containing (lysine methyltransferase) 8	5	124.445	3.534			0.335	2.36e-05
868	ENSMUST00000108817	liver.int.EAA	Hist3h2a	histone cluster 3, H2a	11	58.9547	1.555			0.335	2.36e-05
869	ENSMUST00000069936	liver.int.EAA	Impg2	interphotoreceptor matrix proteoglycan 2	16	56.2043	0.634			0.335	2.37e-05
870	ENSMUST00000108787	pan.EAA/liver.int.EAA	Mrpl55	mitochondrial ribosomal protein L55	11	59.2025	4.353	-0.25	0.00183	-0.335	2.38e-05
871	ENSMUST00000110662	liver.int.EAA	Adal	adenosine deaminase-like	2	121.14	2.335			0.335	2.38e-05
872	ENSMUST00000137035	liver.int.EAA	St3gal6	ST3 beta-galactoside alpha-2,3-sialyltransferase 6	16	58.4681	1.231			0.334	2.41e-05
873	ENSMUST00000119781	liver.int.EAA	Tmem219	transmembrane protein 219	7	126.886	4.919			-0.334	2.42e-05
874	ENSMUST00000000514	liver.int.EAA	Serpinb8	serine (or cysteine) peptidase inhibitor, clade B, member 8	1	107.59	1.984			0.334	2.42e-05
875	ENSMUST00000176624	pan.EAA/liver.int.EAA	Cyp2c29	cytochrome P450, family 2, subfamily c, polypeptide 29	19	39.2694	8.092	-0.354	7e-06	-0.334	2.43e-05
876	ENSMUST00000042970	pan.EAA/liver.int.EAA	Kcnj2	potassium inwardly-rectifying channel, subfamily J, member 2	11	111.066	0.207	0.303	0.000143	0.334	2.43e-05
877	ENSMUST00000126562	liver.int.EAA	Rps9	ribosomal protein S9	7	3.70432	8.222			-0.334	2.43e-05
878	ENSMUST00000201260	liver.int.EAA	Wdr1	WD repeat domain 1	5	38.5276	3.97			0.334	2.43e-05
879	ENSMUST00000043237	liver.int.EAA	Trp53inp2	transformation related protein 53 inducible nuclear protein 2	2	155.382	5.065			0.334	2.43e-05
880	ENSMUST00000003568	liver.int.EAA	Crhr2	corticotropin releasing hormone receptor 2	6	55.09	0.355			-0.334	2.44e-05
881	ENSMUST00000161639	liver.int.EAA	Gfm2	G elongation factor, mitochondrial 2	13	97.138	3.688			0.334	2.44e-05
882	ENSMUST00000152390	liver.int.EAA	Pofut1	protein O-fucosyltransferase 1	2	153.258	1.658			0.334	2.44e-05
883	ENSMUST00000021757	pan.EAA/liver.int.EAA	Aoah	acyloxyacyl hydrolase	13	20.7941	0.577	0.253	0.00159	0.334	2.46e-05
884	ENSMUST00000060524	pan.EAA/liver.int.EAA	Trim10	tripartite motif-containing 10	17	36.8696	0.136	0.316	6.87e-05	0.334	2.47e-05
885	ENSMUST00000008016	liver.int.EAA	Id3	inhibitor of DNA binding 3	4	136.143	5.132			-0.334	2.49e-05
886	ENSMUST00000178504	liver.int.EAA	Atp9a	ATPase, class II, type 9A	2	168.634	4.828			0.334	2.49e-05
887	ENSMUST00000124505	liver.int.EAA	Adcy3	adenylate cyclase 3	12	4.1331	0.594			0.334	2.5e-05
888	ENSMUST00000021706	liver.int.EAA	Traf3	TNF receptor-associated factor 3	12	111.166	1.463			0.334	2.5e-05
889	ENSMUST00000106041	pan.EAA/liver.int.EAA	Depdc1a	DEP domain containing 1a	3	159.495	0.057	0.258	0.0013	0.334	2.51e-05
890	ENSMUST00000156882	liver.int.EAA	Gm16170	predicted gene 16170	11	48.8436	0.657			0.334	2.51e-05
891	ENSMUST00000147525	liver.int.EAA	6430573F11Rik	RIKEN cDNA 6430573F11 gene	8	36.4576	0.579			0.334	2.52e-05
892	ENSMUST00000060274	liver.int.EAA	Traf3	TNF receptor-associated factor 3	12	111.167	1.472			0.334	2.52e-05
893	ENSMUST00000046944	pan.EAA/liver.int.EAA	D630003M21Rik	RIKEN cDNA D630003M21 gene	2	158.196	0.518	0.28	0.000458	0.333	2.53e-05
894	ENSMUST00000109176	liver.int.EAA	Atp9a	ATPase, class II, type 9A	2	168.634	4.82			0.333	2.53e-05
895	ENSMUST00000081799	liver.int.EAA	Sgsm2	small G protein signaling modulator 2	11	74.8493	1.919			0.333	2.53e-05
896	ENSMUST00000171777	liver.int.EAA	6430573F11Rik	RIKEN cDNA 6430573F11 gene	8	36.4892	0.76			0.333	2.53e-05
897	ENSMUST00000107029	liver.int.EAA	Inadl	InaD-like (Drosophila)	4	98.4506	1.602			0.333	2.53e-05
898	ENSMUST00000029060	liver.int.EAA	Atp9a	ATPase, class II, type 9A	2	168.634	4.877			0.333	2.54e-05
899	ENSMUST00000143693	liver.int.EAA	Lgals8	lectin, galactose binding, soluble 8	13	12.4394	5.295			0.333	2.57e-05
900	ENSMUST00000036473	liver.int.EAA	Pomt1	protein-O-mannosyltransferase 1	2	32.2366	2.43			0.333	2.58e-05
901	ENSMUST00000164099	liver.int.EAA	Snx19	sorting nexin 19	9	30.4273	2.628			0.333	2.58e-05
902	ENSMUST00000044604	liver.int.EAA	Crybg3	beta-gamma crystallin domain containing 3	16	59.4921	0.899			0.333	2.59e-05
903	ENSMUST00000109177	liver.int.EAA	Atp9a	ATPase, class II, type 9A	2	168.634	4.901			0.333	2.59e-05
904	ENSMUST00000124888	liver.int.EAA	Lgals8	lectin, galactose binding, soluble 8	13	12.4394	5.114			0.333	2.6e-05
905	ENSMUST00000068947	liver.int.EAA	Acox3	acyl-Coenzyme A oxidase 3, pristanoyl	5	35.583	2.638			0.333	2.6e-05
906	ENSMUST00000099821	liver.int.EAA	Lgals8	lectin, galactose binding, soluble 8	13	12.4394	5.14			0.333	2.61e-05
907	ENSMUST00000020980	pan.EAA/liver.int.EAA	Rrm2	ribonucleotide reductase M2	12	24.7082	1.149	0.281	0.000425	0.333	2.64e-05
908	ENSMUST00000175690	liver.int.EAA	Gm20650	predicted gene 20650	7	126.892	5.668			-0.333	2.64e-05
909	ENSMUST00000191834	liver.int.EAA	Gm37756	predicted gene, 37756	1	172.09	1.93			0.333	2.66e-05
910	ENSMUST00000112923	liver.int.EAA	Ift122	intraflagellar transport 122	6	115.854	0.839			0.333	2.67e-05
911	ENSMUST00000086349	liver.int.EAA	Zfp524	zinc finger protein 524	7	5.0155	3.741			-0.332	2.68e-05
912	ENSMUST00000135166	liver.int.EAA	Lgals8	lectin, galactose binding, soluble 8	13	12.4394	5.292			0.332	2.68e-05
913	ENSMUST00000057631	liver.int.EAA	Sgsm2	small G protein signaling modulator 2	11	74.8493	1.945			0.333	2.68e-05
914	ENSMUST00000026172	liver.int.EAA	Ankrd2	ankyrin repeat domain 2 (stretch responsive muscle)	19	42.036	1.121			0.332	2.69e-05
915	ENSMUST00000026659	pan.EAA/liver.int.EAA	Tmc6	transmembrane channel-like gene family 6	11	117.766	2.723	0.268	0.000811	0.332	2.7e-05
916	ENSMUST00000109175	liver.int.EAA	Atp9a	ATPase, class II, type 9A	2	168.634	4.79			0.332	2.7e-05
917	ENSMUST00000112523	pan.EAA/liver.int.EAA	Clstn3	calsyntenin 3	6	124.431	1.53	0.32	5.4e-05	0.332	2.71e-05
918	ENSMUST00000162517	pan.EAA/liver.int.EAA	Kctd17	potassium channel tetramerisation domain containing 17	15	78.4286	1.635	0.272	0.000671	0.332	2.72e-05
919	ENSMUST00000078849	liver.int.EAA	Gpc6	glypican 6	14	116.925	0.367			0.332	2.72e-05
920	ENSMUST00000047689	pan.EAA/liver.int.EAA	Fignl1	fidgetin-like 1	11	11.8003	0.152	0.35	9.08e-06	0.332	2.73e-05
921	ENSMUST00000108786	pan.EAA/liver.int.EAA	Mrpl55	mitochondrial ribosomal protein L55	11	59.2025	4.286	-0.254	0.00154	-0.332	2.73e-05
922	ENSMUST00000042084	liver.int.EAA	Gfm2	G elongation factor, mitochondrial 2	13	97.1379	3.713			0.332	2.73e-05
923	ENSMUST00000063380	liver.int.EAA	Agfg1	ArfGAP with FG repeats 1	1	82.8397	2.199			0.332	2.73e-05
924	ENSMUST00000069298	liver.int.EAA	Hps1	Hermansky-Pudlak syndrome 1 homolog (human)	19	42.7581	1.952			0.332	2.73e-05
925	ENSMUST00000172044	liver.int.EAA	Zbtb37	zinc finger and BTB domain containing 37	1	161.018	0.678			0.332	2.74e-05
926	ENSMUST00000008297	pan.EAA/liver.int.EAA	Clstn3	calsyntenin 3	6	124.431	1.459	0.32	5.44e-05	0.332	2.76e-05
927	ENSMUST00000102536	liver.int.EAA	Rpl11	ribosomal protein L11	4	136.05	8.199			-0.332	2.76e-05
928	ENSMUST00000159050	liver.int.EAA	Tle3	transducin-like enhancer of split 3, homolog of Drosophila E(spl)	9	61.3734	2.144			0.332	2.76e-05
929	ENSMUST00000131070	liver.int.EAA	Ide	insulin degrading enzyme	19	37.2687	3.427			0.332	2.76e-05
930	ENSMUST00000108080	pan.EAA/liver.int.EAA	Pigw	phosphatidylinositol glycan anchor biosynthesis, class W	11	84.8768	1.156	0.274	0.000617	0.332	2.77e-05
931	ENSMUST00000202266	liver.int.EAA	Acox3	acyl-Coenzyme A oxidase 3, pristanoyl	5	35.5831	2.196			0.332	2.77e-05
932	ENSMUST00000103184	liver.int.EAA	Adra1d	adrenergic receptor, alpha 1d	2	131.546	1.118			0.332	2.77e-05
933	ENSMUST00000160285	pan.EAA/liver.int.EAA	Wdr63	WD repeat domain 63	3	146.041	0.104	0.259	0.00124	0.332	2.78e-05
934	ENSMUST00000048102	liver.int.EAA	Myh14	myosin, heavy polypeptide 14	7	44.6058	2.488			0.332	2.79e-05
935	ENSMUST00000111800	liver.int.EAA	Sh3pxd2a	SH3 and PX domains 2A	19	47.2602	2.101			0.332	2.8e-05
936	ENSMUST00000025965	liver.int.EAA	Hells	helicase, lymphoid specific	19	38.9309	0.147			0.332	2.81e-05
937	ENSMUST00000018470	liver.int.EAA	Ywhab	tyrosine 3-monooxygenase/tryptophan 5-monooxygenase activation protein, beta polypeptide	2	163.995	4.936			0.332	2.81e-05
938	ENSMUST00000135373	liver.int.EAA	6430573F11Rik	RIKEN cDNA 6430573F11 gene	8	36.4575	0.766			0.332	2.81e-05
939	ENSMUST00000171080	pan.EAA/liver.int.EAA	Fignl1	fidgetin-like 1	11	11.8003	0.157	0.352	8.25e-06	0.332	2.82e-05
940	ENSMUST00000002710	liver.int.EAA	Pdcd2l	programmed cell death 2-like	7	34.1845	3.056			-0.332	2.83e-05
941	ENSMUST00000022976	liver.int.EAA	E430025E21Rik	RIKEN cDNA E430025E21 gene	15	59.332	2.747			0.332	2.84e-05
942	ENSMUST00000185534	pan.EAA/liver.int.EAA	Nabp1	nucleic acid binding protein 1	1	51.4711	2.265	0.263	0.00104	0.331	2.85e-05
943	ENSMUST00000182648	liver.int.EAA	Myh14	myosin, heavy polypeptide 14	7	44.6058	2.478			0.331	2.85e-05
944	ENSMUST00000107899	liver.int.EAA	Myh14	myosin, heavy polypeptide 14	7	44.6058	2.498			0.331	2.87e-05
945	ENSMUST00000107900	liver.int.EAA	Myh14	myosin, heavy polypeptide 14	7	44.6058	2.496			0.331	2.87e-05
946	ENSMUST00000042857	liver.int.EAA	Satb2	special AT-rich sequence binding protein 2	1	56.794	0.194			0.331	2.88e-05
947	ENSMUST00000195008	liver.int.EAA	Fndc3b	fibronectin type III domain containing 3B	3	27.4162	2.189			0.331	2.9e-05
948	ENSMUST00000021091	liver.int.EAA	Pafah1b1	platelet-activating factor acetylhydrolase, isoform 1b, subunit 1	11	74.6739	3.359			0.331	2.9e-05
949	ENSMUST00000081619	liver.int.EAA	Sh3pxd2a	SH3 and PX domains 2A	19	47.2602	2.095			0.331	2.9e-05
950	ENSMUST00000119698	liver.int.EAA	Fkbp8	FK506 binding protein 8	8	70.5278	7.601			-0.331	2.91e-05
951	ENSMUST00000046157	liver.int.EAA	Fndc3b	fibronectin type III domain containing 3B	3	27.4162	2.19			0.331	2.92e-05
952	ENSMUST00000065625	pan.EAA/liver.int.EAA	Trmt1l	tRNA methyltransferase 1 like	1	151.429	2.592	0.277	0.000518	0.331	2.93e-05
953	ENSMUST00000107770	liver.int.EAA	Tstd2	thiosulfate sulfurtransferase (rhodanese)-like domain containing 2	4	46.1157	2.32			0.331	2.93e-05
954	ENSMUST00000099820	liver.int.EAA	Lgals8	lectin, galactose binding, soluble 8	13	12.4394	5.179			0.331	2.94e-05
955	ENSMUST00000030125	liver.int.EAA	Bag1	BCL2-associated athanogene 1	4	40.9364	5.923			-0.331	2.95e-05
956	ENSMUST00000110208	liver.int.EAA	Ap5s1	adaptor-related protein 5 complex, sigma 1 subunit	2	131.21	3.872			-0.331	2.96e-05
957	ENSMUST00000065938	liver.int.EAA	Impa1	inositol (myo)-1(or 4)-monophosphatase 1	3	10.312	3.552			0.331	2.96e-05
958	ENSMUST00000075869	pan.EAA/liver.int.EAA	Fbxo40	F-box protein 40	16	36.9635	0.478	0.239	0.00299	0.331	2.98e-05
959	ENSMUST00000191273	liver.int.EAA	Bag1	BCL2-associated athanogene 1	4	40.9364	5.866			-0.331	2.98e-05
960	ENSMUST00000022980	liver.int.EAA	Ndufb9	NADH dehydrogenase (ubiquinone) 1 beta subcomplex, 9	15	58.9338	7.682			-0.331	2.98e-05
961	ENSMUST00000117513	liver.int.EAA	Slc29a3	solute carrier family 29 (nucleoside transporters), member 3	10	60.7121	1.145			0.331	2.98e-05
962	ENSMUST00000146049	liver.int.EAA	Gm14285	predicted gene 14285	2	131.562	1.271			0.331	2.99e-05
963	ENSMUST00000171938	pan.EAA/liver.int.EAA	Fignl1	fidgetin-like 1	11	11.8003	0.152	0.352	7.93e-06	0.331	3e-05
964	ENSMUST00000023774	pan.EAA/liver.int.EAA	Slc11a2	solute carrier family 11 (proton-coupled divalent metal ion transporters), member 2	15	100.388	2.485	0.283	0.0004	0.331	3.01e-05
965	ENSMUST00000075491	liver.int.EAA	Fkbp8	FK506 binding protein 8	8	70.5277	7.69			-0.331	3.01e-05
966	ENSMUST00000087485	liver.int.EAA	C2cd5	C2 calcium-dependent domain containing 5	6	143.011	1.071			0.331	3.01e-05
967	ENSMUST00000179684	pan.EAA/liver.int.EAA	Otub2	OTU domain, ubiquitin aldehyde binding 2	12	103.393	0.781	0.263	0.00103	0.33	3.02e-05
968	ENSMUST00000108089	liver.int.EAA	Bag1	BCL2-associated athanogene 1	4	40.9364	5.879			-0.33	3.02e-05
969	ENSMUST00000119353	liver.int.EAA	Fkbp8	FK506 binding protein 8	8	70.5277	7.671			-0.33	3.02e-05
970	ENSMUST00000089506	liver.int.EAA	Ap5s1	adaptor-related protein 5 complex, sigma 1 subunit	2	131.21	3.93			-0.33	3.02e-05
971	ENSMUST00000110305	liver.int.EAA	Lrp12	low density lipoprotein-related protein 12	15	39.8706	0.886			0.33	3.02e-05
972	ENSMUST00000053175	pan.EAA/liver.int.EAA	Vstm4	V-set and transmembrane domain containing 4	14	32.8568	0.887	0.269	0.000772	0.33	3.03e-05
973	ENSMUST00000041008	liver.int.EAA	Fntb	farnesyltransferase, CAAX box, beta	12	76.8374	1.062			0.33	3.04e-05
974	ENSMUST00000053699	liver.int.EAA	Secisbp2l	SECIS binding protein 2-like	2	125.737	3.202			0.33	3.04e-05
975	ENSMUST00000091002	pan.EAA/liver.int.EAA	Fhdc1	FH2 domain containing 1	3	84.444	0.155	0.287	0.000321	0.33	3.05e-05
976	ENSMUST00000043183	liver.int.EAA	Ces2g	carboxylesterase 2G	8	104.962	3.745			0.33	3.05e-05
977	ENSMUST00000168844	liver.int.EAA	Dis3l	DIS3 mitotic control homolog (S. cerevisiae)-like	9	64.3068	2.502			0.33	3.05e-05
978	ENSMUST00000161689	pan.EAA/liver.int.EAA	Tle3	transducin-like enhancer of split 3, homolog of Drosophila E(spl)	9	61.3737	2.056	0.24	0.0028	0.33	3.06e-05
979	ENSMUST00000028854	liver.int.EAA	Mal	myelin and lymphocyte protein, T cell differentiation protein	2	127.633	0.414			-0.33	3.06e-05
980	ENSMUST00000028049	liver.int.EAA	Rabgap1l	RAB GTPase activating protein 1-like	1	160.257	1.944			0.33	3.08e-05
981	ENSMUST00000068367	liver.int.EAA	Dis3l	DIS3 mitotic control homolog (S. cerevisiae)-like	9	64.3068	2.493			0.33	3.08e-05
982	ENSMUST00000090024	liver.int.EAA	Ccser2	coiled-coil serine rich 2	14	36.8749	2.069			0.33	3.08e-05
983	ENSMUST00000022102	liver.int.EAA	Clptm1l	CLPTM1-like	13	73.604	5.024			0.33	3.09e-05
984	ENSMUST00000198451	liver.int.EAA	Setd8	SET domain containing (lysine methyltransferase) 8	5	124.447	3.697			0.33	3.09e-05
985	ENSMUST00000162061	liver.int.EAA	Hps1	Hermansky-Pudlak syndrome 1 homolog (human)	19	42.7585	2.158			0.33	3.11e-05
986	ENSMUST00000197321	pan.EAA/liver.int.EAA	Gm10030	predicted gene 10030	9	110.989	1.288	0.274	0.000618	0.33	3.12e-05
987	ENSMUST00000161207	pan.EAA/liver.int.EAA	Tle3	transducin-like enhancer of split 3, homolog of Drosophila E(spl)	9	61.3735	2.151	0.24	0.00284	0.33	3.13e-05
988	ENSMUST00000132296	liver.int.EAA	Gm11583	predicted gene 11583	11	97.161	3.505			0.33	3.14e-05
989	ENSMUST00000178113	pan.EAA/liver.int.EAA	Tle3	transducin-like enhancer of split 3, homolog of Drosophila E(spl)	9	61.3724	2.096	0.244	0.00242	0.33	3.15e-05
990	ENSMUST00000105646	pan.EAA/liver.int.EAA	Ajap1	adherens junction associated protein 1	4	153.373	0.06	0.261	0.00112	0.33	3.17e-05
991	ENSMUST00000171349	liver.int.EAA	C2cd5	C2 calcium-dependent domain containing 5	6	143.011	1.084			0.33	3.18e-05
992	ENSMUST00000105516	pan.EAA/liver.int.EAA	Themis	thymocyte selection associated	10	28.6684	0.161	0.315	7.21e-05	0.33	3.19e-05
993	ENSMUST00000166335	liver.int.EAA	Elof1	elongation factor 1 homolog (ELF1, S. cerevisiae)	9	22.113	4.77			-0.33	3.19e-05
994	ENSMUST00000162973	pan.EAA/liver.int.EAA	Tle3	transducin-like enhancer of split 3, homolog of Drosophila E(spl)	9	61.3734	2.023	0.246	0.00218	0.329	3.21e-05
995	ENSMUST00000062620	pan.EAA/liver.int.EAA	Hamp	hepcidin antimicrobial peptide	7	30.9424	9.873	-0.278	0.000507	-0.329	3.22e-05
996	ENSMUST00000022715	liver.int.EAA	Rbm26	RNA binding motif protein 26	14	105.115	1.847			0.329	3.22e-05
997	ENSMUST00000036211	pan.EAA/liver.int.EAA	Gpr12	G-protein coupled receptor 12	5	146.582	1.136	0.292	0.000251	0.329	3.23e-05
998	ENSMUST00000096608	liver.int.EAA	Mroh9	maestro heat-like repeat family member 9	1	163.024	0.018			-0.329	3.23e-05
999	ENSMUST00000067700	liver.int.EAA	Ccser2	coiled-coil serine rich 2	14	36.8749	2.093			0.329	3.24e-05
1000	ENSMUST00000091325	liver.int.EAA	Lrrcc1	leucine rich repeat and coiled-coil domain containing 1	3	14.5338	0.52			0.329	3.25e-05
1001	ENSMUST00000115237	liver.int.EAA	Ntm	neurotrimin	9	28.996	0.688			0.329	3.25e-05
1002	ENSMUST00000045697	pan.EAA/liver.int.EAA	Mrpl55	mitochondrial ribosomal protein L55	11	59.2025	4.005	-0.252	0.00168	-0.329	3.26e-05
1003	ENSMUST00000169679	liver.int.EAA	Zfp532	zinc finger protein 532	18	65.5825	0.493			0.329	3.26e-05
1004	ENSMUST00000162583	pan.EAA/liver.int.EAA	Tle3	transducin-like enhancer of split 3, homolog of Drosophila E(spl)	9	61.3732	1.987	0.245	0.00226	0.329	3.27e-05
1005	ENSMUST00000038574	liver.int.EAA	Dhx29	DEAH (Asp-Glu-Ala-His) box polypeptide 29	13	112.928	1.607			0.329	3.27e-05
1006	ENSMUST00000048962	pan.EAA/liver.int.EAA	Kif4	kinesin family member 4	X	100.626	0.127	0.279	0.00049	0.329	3.3e-05
1007	ENSMUST00000114237	liver.int.EAA	Acox3	acyl-Coenzyme A oxidase 3, pristanoyl	5	35.5831	2.654			0.329	3.3e-05
1008	ENSMUST00000187867	liver.int.EAA	Gm28989	predicted gene 28989	13	106.788	0.678			0.329	3.3e-05
1009	ENSMUST00000038815	liver.int.EAA	Sox5	SRY (sex determining region Y)-box 5	6	143.828	1.353			0.329	3.31e-05
1010	ENSMUST00000170367	liver.int.EAA	Sox5	SRY (sex determining region Y)-box 5	6	143.828	1.358			0.329	3.31e-05
1011	ENSMUST00000055808	liver.int.EAA	Ywhag	tyrosine 3-monooxygenase/tryptophan 5-monooxygenase activation protein, gamma polypeptide	5	135.908	4.968			0.329	3.31e-05
1012	ENSMUST00000108785	pan.EAA/liver.int.EAA	Mrpl55	mitochondrial ribosomal protein L55	11	59.2025	4.233	-0.252	0.00171	-0.329	3.32e-05
1013	ENSMUST00000102520	liver.int.EAA	Pafah1b1	platelet-activating factor acetylhydrolase, isoform 1b, subunit 1	11	74.6739	3.317			0.329	3.33e-05
1014	ENSMUST00000098948	liver.int.EAA	Smarca4	SWI/SNF related, matrix associated, actin dependent regulator of chromatin, subfamily a, member 4	9	21.6162	3.426			0.329	3.34e-05
1015	ENSMUST00000099739	liver.int.EAA	Tbc1d32	TBC1 domain family, member 32	10	56.0143	0.722			0.329	3.34e-05
1016	ENSMUST00000020637	liver.int.EAA	Canx	calnexin	11	50.2945	6.017			0.329	3.36e-05
1017	ENSMUST00000069074	liver.int.EAA	Cadps2	Ca2+-dependent activator protein for secretion 2	6	23.2635	1.991			0.329	3.36e-05
1018	ENSMUST00000195132	pan.EAA/liver.int.EAA	Gm37273	predicted gene, 37273	1	162.983	2.084	-0.351	8.49e-06	-0.329	3.37e-05
1019	ENSMUST00000034820	pan.EAA/liver.int.EAA	Tle3	transducin-like enhancer of split 3, homolog of Drosophila E(spl)	9	61.3729	2.091	0.243	0.00247	0.329	3.37e-05
1020	ENSMUST00000058393	liver.int.EAA	A430005L14Rik	RIKEN cDNA A430005L14 gene	4	153.957	4.591			-0.329	3.37e-05
1021	ENSMUST00000100327	liver.int.EAA	Rbm26	RNA binding motif protein 26	14	105.115	1.855			0.329	3.37e-05
1022	ENSMUST00000034707	liver.int.EAA	Smarca4	SWI/SNF related, matrix associated, actin dependent regulator of chromatin, subfamily a, member 4	9	21.6162	3.43			0.329	3.38e-05
1023	ENSMUST00000170511	pan.EAA/liver.int.EAA	BC035947	cDNA sequence BC035947	1	78.497	0.085	0.328	3.39e-05	0.328	3.39e-05
1024	ENSMUST00000113890	liver.int.EAA	Dis3l	DIS3 mitotic control homolog (S. cerevisiae)-like	9	64.307	2.588			0.328	3.4e-05
1025	ENSMUST00000095606	liver.int.EAA	Zfp213	zinc finger protein 213	17	23.5568	1.867			0.328	3.44e-05
1026	ENSMUST00000196648	liver.int.EAA	Acad9	acyl-Coenzyme A dehydrogenase family, member 9	3	36.0661	3.719			0.328	3.45e-05
1027	ENSMUST00000184389	liver.int.EAA	Pigb	phosphatidylinositol glycan anchor biosynthesis, class B	9	73.0147	1.733			0.328	3.47e-05
1028	ENSMUST00000171415	liver.int.EAA	Ndufb8	NADH dehydrogenase (ubiquinone) 1 beta subcomplex 8	19	44.5486	5.323			-0.328	3.48e-05
1029	ENSMUST00000131428	liver.int.EAA	Rab17	RAB17, member RAS oncogene family	1	90.9581	4.067			-0.328	3.48e-05
1030	ENSMUST00000105702	liver.int.EAA	Tardbp	TAR DNA binding protein	4	148.612	3.849			0.328	3.48e-05
1031	ENSMUST00000013966	liver.int.EAA	Elof1	elongation factor 1 homolog (ELF1, S. cerevisiae)	9	22.113	5.052			-0.328	3.49e-05
1032	ENSMUST00000054220	liver.int.EAA	Rpl18a	ribosomal protein L18A	8	70.8947	7.889			-0.328	3.49e-05
1033	ENSMUST00000165113	liver.int.EAA	Tardbp	TAR DNA binding protein	4	148.612	3.84			0.328	3.49e-05
1034	ENSMUST00000179865	liver.int.EAA	Canx	calnexin	11	50.294	5.847			0.328	3.5e-05
1035	ENSMUST00000036003	liver.int.EAA	Klhl42	kelch-like 42	6	147.091	1.55			0.328	3.51e-05
1036	ENSMUST00000111758	liver.int.EAA	C2cd5	C2 calcium-dependent domain containing 5	6	143.011	1.091			0.328	3.51e-05
1037	ENSMUST00000114143	liver.int.EAA	Fam3a	family with sequence similarity 3, member A	X	74.3847	3.211			0.328	3.52e-05
1038	ENSMUST00000120613	liver.int.EAA	Kif3a	kinesin family member 3A	11	53.5674	1.03			0.328	3.53e-05
1039	ENSMUST00000172073	liver.int.EAA	Tardbp	TAR DNA binding protein	4	148.612	3.838			0.328	3.54e-05
1040	ENSMUST00000174008	liver.int.EAA	Smarca4	SWI/SNF related, matrix associated, actin dependent regulator of chromatin, subfamily a, member 4	9	21.6163	3.637			0.328	3.54e-05
1041	ENSMUST00000022925	liver.int.EAA	Eif3h	eukaryotic translation initiation factor 3, subunit H	15	51.7866	6.571			-0.328	3.55e-05
1042	ENSMUST00000046206	liver.int.EAA	Rprd1a	regulation of nuclear pre-mRNA domain containing 1A	18	24.485	1.387			0.328	3.56e-05
1043	ENSMUST00000010007	liver.int.EAA	Sdhb	succinate dehydrogenase complex, subunit B, iron sulfur (Ip)	4	140.961	7.229			-0.328	3.57e-05
1044	ENSMUST00000107664	liver.int.EAA	Sh3d19	SH3 domain protein D19	3	86.0844	3.116			0.328	3.57e-05
1045	ENSMUST00000031277	pan.EAA/liver.int.EAA	Prkg2	protein kinase, cGMP-dependent, type II	5	98.9317	0.025	0.269	0.000767	0.328	3.59e-05
1046	ENSMUST00000181911	liver.int.EAA	Gm26827	predicted gene, 26827	7	66.1095	1.248			0.328	3.59e-05
1047	ENSMUST00000035218	pan.EAA/liver.int.EAA	Nckipsd	NCK interacting protein with SH3 domain	9	108.808	1.258	0.253	0.0016	0.327	3.61e-05
1048	ENSMUST00000067545	liver.int.EAA	Lclat1	lysocardiolipin acyltransferase 1	17	73.108	3.341			0.327	3.61e-05
1049	ENSMUST00000087701	liver.int.EAA	Mfsd6	major facilitator superfamily domain containing 6	1	52.66	1.096			0.327	3.62e-05
1050	ENSMUST00000182042	liver.int.EAA	Ccser2	coiled-coil serine rich 2	14	36.8794	2.019			0.327	3.62e-05
1051	ENSMUST00000034085	liver.int.EAA	Brd7	bromodomain containing 7	8	88.3311	2.915			0.327	3.65e-05
1052	ENSMUST00000021407	liver.int.EAA	Srp54a	signal recognition particle 54A	12	55.0892	4.048			0.327	3.66e-05
1053	ENSMUST00000111308	liver.int.EAA	Gusb	glucuronidase, beta	5	129.999	2.668			0.327	3.66e-05
1054	ENSMUST00000019882	liver.int.EAA	Polr2i	polymerase (RNA) II (DNA directed) polypeptide I	7	30.2319	4.508			-0.327	3.67e-05
1055	ENSMUST00000175523	liver.int.EAA	Gm23419	predicted gene, 23419	11	120.347	6.608			0.327	3.69e-05
1056	ENSMUST00000052969	liver.int.EAA	Ston2	stonin 2	12	91.6385	1.14			0.327	3.69e-05
1057	ENSMUST00000042664	liver.int.EAA	Slc16a2	solute carrier family 16 (monocarboxylic acid transporters), member 2	X	103.697	5.261			0.327	3.69e-05
1058	ENSMUST00000039827	liver.int.EAA	Aff3	AF4/FMR2 family, member 3	1	38.1773	0.265			0.327	3.69e-05
1059	ENSMUST00000060409	pan.EAA/liver.int.EAA	Themis	thymocyte selection associated	10	28.6684	0.166	0.314	7.72e-05	0.327	3.71e-05
1060	ENSMUST00000061455	liver.int.EAA	Fam46c	family with sequence similarity 46, member C	3	100.468	1.522			0.327	3.71e-05
1061	ENSMUST00000024756	liver.int.EAA	Enpp5	ectonucleotide pyrophosphatase/phosphodiesterase 5	17	44.0788	2.967			0.327	3.72e-05
1062	ENSMUST00000110455	liver.int.EAA	Hist1h2bk	histone cluster 1, H2bk; (BXD Mendelian reference 13.22, high D)	13	22.0359	2.06			-0.327	3.73e-05
1063	ENSMUST00000050073	liver.int.EAA	Dnajb4	DnaJ (Hsp40) homolog, subfamily B, member 4	3	152.184	3.246			0.327	3.73e-05
1064	ENSMUST00000054697	liver.int.EAA	Yipf6	Yip1 domain family, member 6	X	98.9378	2.364			0.327	3.73e-05
1065	ENSMUST00000204655	liver.int.EAA	C2cd5	C2 calcium-dependent domain containing 5	6	143.011	1.087			0.327	3.77e-05
1066	ENSMUST00000102929	liver.int.EAA	Tdrd7	tudor domain containing 7	4	45.9722	2.618			0.327	3.77e-05
1067	ENSMUST00000016033	liver.int.EAA	Lta4h	leukotriene A4 hydrolase	10	93.4534	3.512			0.327	3.77e-05
1068	ENSMUST00000086614	liver.int.EAA	Zranb3	zinc finger, RAN-binding domain containing 3	1	127.954	0.661			0.327	3.78e-05
1069	ENSMUST00000105734	pan.EAA/liver.int.EAA	Gm13157	predicted gene 13157	4	147.754	0.509	0.262	0.00109	0.327	3.79e-05
1070	ENSMUST00000063717	pan.EAA/liver.int.EAA	Phtf1	putative homeodomain transcription factor 1	3	103.968	1.162	0.255	0.00147	0.327	3.79e-05
1071	ENSMUST00000092425	liver.int.EAA	Rpl19	ribosomal protein L19	11	98.0267	8.221			-0.326	3.82e-05
1072	ENSMUST00000095027	liver.int.EAA	Aff3	AF4/FMR2 family, member 3	1	38.1773	0.271			0.326	3.82e-05
1073	ENSMUST00000079414	pan.EAA/liver.int.EAA	Cep89	centrosomal protein 89	7	35.3971	1.488	0.274	0.000605	0.326	3.83e-05
1074	ENSMUST00000000090	liver.int.EAA	Cox5a	cytochrome c oxidase subunit Va	9	57.5212	7.096			-0.326	3.83e-05
1075	ENSMUST00000007130	liver.int.EAA	Ctnnb1	catenin (cadherin associated protein), beta 1	9	120.933	5.611			0.326	3.83e-05
1076	ENSMUST00000120760	liver.int.EAA	Dis3l	DIS3 mitotic control homolog (S. cerevisiae)-like	9	64.307	2.467			0.326	3.84e-05
1077	ENSMUST00000159630	pan.EAA/liver.int.EAA	Tle3	transducin-like enhancer of split 3, homolog of Drosophila E(spl)	9	61.3735	1.987	0.241	0.0027	0.326	3.85e-05
1078	ENSMUST00000198270	liver.int.EAA	Ywhag	tyrosine 3-monooxygenase/tryptophan 5-monooxygenase activation protein, gamma polypeptide	5	135.908	5.103			0.326	3.87e-05
1079	ENSMUST00000030513	pan.EAA/liver.int.EAA	Mrto4	mRNA turnover 4, homolog (S. cerevisiae)	4	139.347	4.001	-0.25	0.00179	-0.326	3.88e-05
1080	ENSMUST00000168276	pan.EAA/liver.int.EAA	Atp8b2	ATPase, class I, type 8B, member 2	3	89.9408	0.599	0.244	0.00234	0.326	3.88e-05
1081	ENSMUST00000017548	liver.int.EAA	Rpl19	ribosomal protein L19	11	98.0269	8.198			-0.326	3.88e-05
1082	ENSMUST00000086831	liver.int.EAA	Pkd2	polycystic kidney disease 2	5	104.459	2.078			0.326	3.88e-05
1083	ENSMUST00000037353	pan.EAA/liver.int.EAA	Eda2r	ectodysplasin A2 receptor	X	97.3338	0.33	0.247	0.0021	0.326	3.92e-05
1084	ENSMUST00000189220	liver.int.EAA	Agfg1	ArfGAP with FG repeats 1	1	82.8395	1.621			0.326	3.92e-05
1085	ENSMUST00000103145	pan.EAA/liver.int.EAA	E2f1	E2F transcription factor 1	2	154.559	1.144	0.335	2.3e-05	0.326	3.94e-05
1086	ENSMUST00000081714	liver.int.EAA	Hoga1	4-hydroxy-2-oxoglutarate aldolase 1	19	42.0458	6.511			-0.326	3.94e-05
1087	ENSMUST00000100660	liver.int.EAA	Deptor	DEP domain containing MTOR-interacting protein	15	55.1124	3.807			0.326	3.94e-05
1088	ENSMUST00000173249	pan.EAA/liver.int.EAA	Gm20412	predicted gene 20412	2	158.117	6.131	0.24	0.00277	0.326	3.96e-05
1089	ENSMUST00000101225	liver.int.EAA	Psen1	presenilin 1	12	83.6886	3.632			0.326	3.96e-05
1090	ENSMUST00000044195	pan.EAA/liver.int.EAA	Tmc7	transmembrane channel-like gene family 7	7	118.536	0.447	0.33	3.1e-05	0.326	3.99e-05
1091	ENSMUST00000034141	liver.int.EAA	Lonp2	lon peptidase 2, peroxisomal	8	86.624	6.631			0.326	3.99e-05
1092	ENSMUST00000077175	liver.int.EAA	Polr3b	polymerase (RNA) III (DNA directed) polypeptide B	10	84.6224	2			0.326	3.99e-05
1093	ENSMUST00000194558	pan.EAA/liver.int.EAA	Kpna4	karyopherin (importin) alpha 4	3	69.0722	2.882	0.24	0.00276	0.326	4e-05
1094	ENSMUST00000108370	liver.int.EAA	Lrrcc1	leucine rich repeat and coiled-coil domain containing 1	3	14.5338	0.497			0.326	4.01e-05
1095	ENSMUST00000041606	liver.int.EAA	Necab1	N-terminal EF-hand calcium binding protein 1	4	14.9522	2.568			0.326	4.01e-05
1096	ENSMUST00000081834	liver.int.EAA	Armcx3	armadillo repeat containing, X-linked 3	X	134.757	1.019			0.326	4.02e-05
1097	ENSMUST00000154166	liver.int.EAA	Enpp5	ectonucleotide pyrophosphatase/phosphodiesterase 5	17	44.0788	2.976			0.326	4.02e-05
1098	ENSMUST00000163499	liver.int.EAA	Rbm26	RNA binding motif protein 26	14	105.116	1.665			0.326	4.02e-05
1099	ENSMUST00000192603	liver.int.EAA	Gm38303	predicted gene, 38303	3	10.3217	4.151			0.326	4.02e-05
1100	ENSMUST00000106257	pan.EAA/liver.int.EAA	Cap1	CAP, adenylate cyclase-associated protein 1 (yeast)	4	122.859	4.987	0.282	0.000414	0.325	4.06e-05
1101	ENSMUST00000106255	pan.EAA/liver.int.EAA	Cap1	CAP, adenylate cyclase-associated protein 1 (yeast)	4	122.859	5.003	0.282	0.000414	0.325	4.07e-05
1102	ENSMUST00000069533	pan.EAA/liver.int.EAA	Cap1	CAP, adenylate cyclase-associated protein 1 (yeast)	4	122.859	5.064	0.282	0.000416	0.325	4.07e-05
1103	ENSMUST00000049064	pan.EAA/liver.int.EAA	Rap2b	RAP2B, member of RAS oncogene family	3	61.3616	0.844	0.311	9.13e-05	0.325	4.08e-05
1104	ENSMUST00000187458	liver.int.EAA	2510046G10Rik	RIKEN cDNA 2510046G10 gene	7	126.649	1.749			-0.325	4.08e-05
1105	ENSMUST00000042167	liver.int.EAA	Cpq	carboxypeptidase Q	15	33.0831	4.809			0.325	4.08e-05
1106	ENSMUST00000022916	liver.int.EAA	Lrp12	low density lipoprotein-related protein 12	15	39.8706	0.894			0.325	4.09e-05
1107	ENSMUST00000042834	liver.int.EAA	Uqcrfs1	ubiquinol-cytochrome c reductase, Rieske iron-sulfur polypeptide 1	13	30.5403	6.852			-0.325	4.12e-05
1108	ENSMUST00000022826	liver.int.EAA	Fitm1	fat storage-inducing transmembrane protein 1	14	55.5756	3.846			0.325	4.12e-05
1109	ENSMUST00000084125	liver.int.EAA	Tardbp	TAR DNA binding protein	4	148.612	3.817			0.325	4.12e-05
1110	ENSMUST00000107777	liver.int.EAA	Tdrd7	tudor domain containing 7	4	45.9653	2.625			0.325	4.12e-05
1111	ENSMUST00000161611	liver.int.EAA	Prg4	proteoglycan 4 (megakaryocyte stimulating factor, articular superficial zone protein)	1	150.45	3.459			0.325	4.12e-05
1112	ENSMUST00000164600	liver.int.EAA	Prg4	proteoglycan 4 (megakaryocyte stimulating factor, articular superficial zone protein)	1	150.449	3.331			0.325	4.13e-05
1113	ENSMUST00000120531	liver.int.EAA	Stxbp6	syntaxin binding protein 6 (amisyn)	12	44.8525	1.948			0.325	4.14e-05
1114	ENSMUST00000159386	liver.int.EAA	Tle3	transducin-like enhancer of split 3, homolog of Drosophila E(spl)	9	61.3724	2.186			0.325	4.14e-05
1115	ENSMUST00000120102	liver.int.EAA	Dsg2	desmoglein 2	18	20.5582	2.57			0.325	4.14e-05
1116	ENSMUST00000178812	liver.int.EAA	Ctnnb1	catenin (cadherin associated protein), beta 1	9	120.934	5.664			0.325	4.16e-05
1117	ENSMUST00000004920	liver.int.EAA	Ulk2	unc-51 like kinase 2	11	61.7756	3.153			0.325	4.18e-05
1118	ENSMUST00000000894	pan.EAA/liver.int.EAA	E2f1	E2F transcription factor 1	2	154.56	1.142	0.335	2.26e-05	0.325	4.19e-05
1119	ENSMUST00000058060	liver.int.EAA	Bod1	biorientation of chromosomes in cell division 1	11	31.6652	4.175			-0.325	4.19e-05
1120	ENSMUST00000112720	pan.EAA/liver.int.EAA	Apex2	apurinic/apyrimidinic endonuclease 2	X	150.569	1.158	0.254	0.00151	0.325	4.22e-05
1121	ENSMUST00000182161	pan.EAA/liver.int.EAA	Sowahc	sosondowah ankyrin repeat domain family member C	10	59.222	1.5	0.266	0.000873	0.325	4.23e-05
1122	ENSMUST00000188051	pan.EAA/liver.int.EAA	Nabp1	nucleic acid binding protein 1	1	51.4711	2.32	0.257	0.00133	0.325	4.23e-05
1123	ENSMUST00000109664	pan.EAA/liver.int.EAA	Fignl1	fidgetin-like 1	11	11.8006	0.155	0.347	1.12e-05	0.325	4.24e-05
1124	ENSMUST00000110013	pan.EAA/liver.int.EAA	Jak3	Janus kinase 3	8	71.6763	3.031	0.261	0.0011	0.325	4.24e-05
1125	ENSMUST00000161240	liver.int.EAA	Galnt4	UDP-N-acetyl-alpha-D-galactosamine:polypeptide N-acetylgalactosaminyltransferase 4	10	99.1082	1.942			0.325	4.24e-05
1126	ENSMUST00000120340	liver.int.EAA	9430038I01Rik	RIKEN cDNA 9430038I01 gene	7	137.383	0.912			-0.325	4.25e-05
1127	ENSMUST00000024708	pan.EAA/liver.int.EAA	Tnfrsf21	tumor necrosis factor receptor superfamily, member 21	17	43.0166	2.44	0.247	0.00205	0.325	4.26e-05
1128	ENSMUST00000152796	liver.int.EAA	Ythdf2	YTH domain family 2	4	132.185	2.401			0.325	4.26e-05
1129	ENSMUST00000111901	liver.int.EAA	Prg4	proteoglycan 4 (megakaryocyte stimulating factor, articular superficial zone protein)	1	150.449	3.544			0.325	4.27e-05
1130	ENSMUST00000110012	pan.EAA/liver.int.EAA	Jak3	Janus kinase 3	8	71.6775	3.095	0.261	0.00111	0.324	4.28e-05
1131	ENSMUST00000123129	liver.int.EAA	Gm13372	predicted gene 13372	2	28.0254	0.52			0.324	4.3e-05
1132	ENSMUST00000055966	pan.EAA/liver.int.EAA	Gabra3	gamma-aminobutyric acid (GABA) A receptor, subunit alpha 3	X	72.4327	0.535	0.24	0.00276	0.324	4.32e-05
1133	ENSMUST00000106065	pan.EAA/liver.int.EAA	Negr1	neuronal growth regulator 1	3	156.562	0.035	0.291	0.000263	0.324	4.35e-05
1134	ENSMUST00000111902	liver.int.EAA	Prg4	proteoglycan 4 (megakaryocyte stimulating factor, articular superficial zone protein)	1	150.449	3.481			0.324	4.35e-05
1135	ENSMUST00000182666	liver.int.EAA	Sh3d19	SH3 domain protein D19	3	86.0709	3.179			0.324	4.35e-05
1136	ENSMUST00000191820	liver.int.EAA	Tlr5	toll-like receptor 5	1	182.972	1.253			0.324	4.35e-05
1137	ENSMUST00000160882	pan.EAA/liver.int.EAA	Tle3	transducin-like enhancer of split 3, homolog of Drosophila E(spl)	9	61.3734	2.103	0.239	0.0029	0.324	4.37e-05
1138	ENSMUST00000100052	liver.int.EAA	Igf2bp2	insulin-like growth factor 2 mRNA binding protein 2	16	22.059	0.539			0.324	4.37e-05
1139	ENSMUST00000115021	liver.int.EAA	Cald1	caldesmon 1	6	34.7094	5.691			0.324	4.38e-05
1140	ENSMUST00000020608	liver.int.EAA	Ppp2ca	protein phosphatase 2 (formerly 2A), catalytic subunit, alpha isoform	11	52.0987	3.823			0.324	4.4e-05
1141	ENSMUST00000154460	liver.int.EAA	Ap3m1	adaptor-related protein complex 3, mu 1 subunit	14	21.0314	3.226			0.324	4.4e-05
1142	ENSMUST00000123487	liver.int.EAA	Pofut1	protein O-fucosyltransferase 1	2	153.257	1.463			0.324	4.41e-05
1143	ENSMUST00000197786	liver.int.EAA	Hax1	HCLS1 associated X-1	3	89.9955	5.357			-0.324	4.44e-05
1144	ENSMUST00000003137	pan.EAA/liver.int.EAA	Cyp2c29	cytochrome P450, family 2, subfamily c, polypeptide 29	19	39.2871	8.179	-0.349	9.71e-06	-0.324	4.45e-05
1145	ENSMUST00000115026	liver.int.EAA	Cald1	caldesmon 1	6	34.5986	5.636			0.324	4.45e-05
1146	ENSMUST00000114238	liver.int.EAA	Acox3	acyl-Coenzyme A oxidase 3, pristanoyl	5	35.5835	2.39			0.324	4.45e-05
1147	ENSMUST00000050467	liver.int.EAA	Tob2	transducer of ERBB2, 2	15	81.8483	4.157			0.324	4.45e-05
1148	ENSMUST00000127874	liver.int.EAA	Rpl9	ribosomal protein L9	5	65.3884	6.193			-0.324	4.46e-05
1149	ENSMUST00000021001	liver.int.EAA	Rab10	RAB10, member RAS oncogene family	12	3.24743	4.476			0.324	4.47e-05
1150	ENSMUST00000079391	liver.int.EAA	Cald1	caldesmon 1	6	34.5985	5.62			0.324	4.47e-05
1151	ENSMUST00000110997	liver.int.EAA	Tlr5	toll-like receptor 5	1	182.955	1.503			0.324	4.48e-05
1152	ENSMUST00000099441	pan.EAA/liver.int.EAA	Slc35d2	solute carrier family 35, member D2	13	64.0963	3.533	-0.265	0.000921	-0.324	4.49e-05
1153	ENSMUST00000118543	liver.int.EAA	Rpl9	ribosomal protein L9	5	65.3884	7.349			-0.324	4.49e-05
1154	ENSMUST00000057885	liver.int.EAA	Rpl9	ribosomal protein L9	5	65.3884	8.036			-0.324	4.5e-05
1155	ENSMUST00000018875	liver.int.EAA	Ap2b1	adaptor-related protein complex 2, beta 1 subunit	11	83.3025	3.238			0.324	4.5e-05
1156	ENSMUST00000119582	liver.int.EAA	Kbtbd8	kelch repeat and BTB (POZ) domain containing 8	6	95.1179	0.296			0.324	4.5e-05
1157	ENSMUST00000074425	liver.int.EAA	Efcab14	EF-hand calcium binding domain 14	4	115.738	2.046			0.324	4.51e-05
1158	ENSMUST00000086884	liver.int.EAA	Armcx3	armadillo repeat containing, X-linked 3	X	134.757	0.991			0.324	4.51e-05
1159	ENSMUST00000087324	pan.EAA/liver.int.EAA	Pgm1	phosphoglucomutase 1	5	64.0929	1.717	0.305	0.000123	0.324	4.52e-05
1160	ENSMUST00000165288	pan.EAA/liver.int.EAA	Gria3	glutamate receptor, ionotropic, AMPA3 (alpha 3)	X	41.4016	0.218	0.256	0.00143	0.323	4.55e-05
1161	ENSMUST00000029825	liver.int.EAA	Depdc1a	DEP domain containing 1a	3	159.495	0.046			0.323	4.55e-05
1162	ENSMUST00000177111	pan.EAA/liver.int.EAA	Itgad	integrin, alpha D	7	128.174	0.095	0.331	2.94e-05	0.323	4.58e-05
1163	ENSMUST00000178224	liver.int.EAA	D430019H16Rik	RIKEN cDNA D430019H16 gene	12	105.454	0.256			0.323	4.58e-05
1164	ENSMUST00000100497	pan.EAA/liver.int.EAA	Actb	actin, beta	5	142.903	8.09	0.292	0.000255	0.323	4.59e-05
1165	ENSMUST00000184035	liver.int.EAA	Pigb	phosphatidylinositol glycan anchor biosynthesis, class B	9	73.0137	1.811			0.323	4.59e-05
1166	ENSMUST00000144950	liver.int.EAA	Dnajb4	DnaJ (Hsp40) homolog, subfamily B, member 4	3	152.184	3.271			0.323	4.59e-05
1167	ENSMUST00000159228	liver.int.EAA	Poc1b	POC1 centriolar protein homolog B (Chlamydomonas)	10	99.1071	1.55			0.323	4.6e-05
1168	ENSMUST00000028280	liver.int.EAA	Col5a1	collagen, type V, alpha 1	2	27.8864	1.269			0.323	4.62e-05
1169	ENSMUST00000049488	liver.int.EAA	Serinc5	serine incorporator 5	13	92.6111	3.205			0.323	4.63e-05
1170	ENSMUST00000071826	liver.int.EAA	Crb3	crumbs family member 3	17	57.0591	3.616			-0.323	4.64e-05
1171	ENSMUST00000160116	liver.int.EAA	Impg2	interphotoreceptor matrix proteoglycan 2	16	56.2043	0.657			0.323	4.65e-05
1172	ENSMUST00000166543	pan.EAA/liver.int.EAA	Ralbp1	ralA binding protein 1	17	65.8484	3.33	0.266	0.000887	0.323	4.67e-05
1173	ENSMUST00000122188	liver.int.EAA	Lonp2	lon peptidase 2, peroxisomal	8	86.6241	6.816			0.323	4.67e-05
1174	ENSMUST00000072156	liver.int.EAA	Tiam2	T cell lymphoma invasion and metastasis 2	17	3.39721	0.938			0.323	4.71e-05
1175	ENSMUST00000021634	liver.int.EAA	Akr1c13	aldo-keto reductase family 1, member C13	13	4.19119	5.591			-0.323	4.72e-05
1176	ENSMUST00000106640	liver.int.EAA	Parva	parvin, alpha	7	112.52	4.312			0.323	4.73e-05
1177	ENSMUST00000118627	liver.int.EAA	Sfi1	Sfi1 homolog, spindle assembly associated (yeast)	11	3.18557	1.655			-0.323	4.75e-05
1178	ENSMUST00000047923	liver.int.EAA	Sec24d	Sec24 related gene family, member D (S. cerevisiae)	3	123.267	4.089			0.323	4.75e-05
1179	ENSMUST00000024905	pan.EAA/liver.int.EAA	Ralbp1	ralA binding protein 1	17	65.8484	3.433	0.264	0.00098	0.323	4.76e-05
1180	ENSMUST00000182797	liver.int.EAA	Ccser2	coiled-coil serine rich 2	14	36.8791	2.144			0.323	4.76e-05
1181	ENSMUST00000162004	liver.int.EAA	Hps1	Hermansky-Pudlak syndrome 1 homolog (human)	19	42.7551	2.4			0.323	4.77e-05
1182	ENSMUST00000026194	liver.int.EAA	Hps1	Hermansky-Pudlak syndrome 1 homolog (human)	19	42.7552	2.479			0.323	4.77e-05
1183	ENSMUST00000113126	liver.int.EAA	Mapkap1	mitogen-activated protein kinase associated protein 1	2	34.432	3.345			0.323	4.78e-05
1184	ENSMUST00000000137	liver.int.EAA	Actr2	ARP2 actin-related protein 2	11	20.0623	4.758			0.323	4.78e-05
1185	ENSMUST00000115379	liver.int.EAA	Igf2bp2	insulin-like growth factor 2 mRNA binding protein 2	16	22.0595	0.567			0.323	4.79e-05
1186	ENSMUST00000167152	pan.EAA/liver.int.EAA	Mas1	MAS1 oncogene	17	12.8411	0.105	0.347	1.14e-05	0.322	4.8e-05
1187	ENSMUST00000066778	liver.int.EAA	Pi4k2a	phosphatidylinositol 4-kinase type 2 alpha	19	42.0904	4.23			0.322	4.8e-05
1188	ENSMUST00000071935	liver.int.EAA	Myo9b	myosin IXb	8	71.2727	2.404			0.322	4.8e-05
1189	ENSMUST00000168839	liver.int.EAA	Myo9b	myosin IXb	8	71.2727	2.397			0.322	4.81e-05
1190	ENSMUST00000161747	pan.EAA/liver.int.EAA	Mas1	MAS1 oncogene	17	12.8411	0.105	0.346	1.15e-05	0.322	4.82e-05
1191	ENSMUST00000144283	liver.int.EAA	Lgals8	lectin, galactose binding, soluble 8	13	12.4408	5.325			0.322	4.82e-05
1192	ENSMUST00000114357	liver.int.EAA	St3gal6	ST3 beta-galactoside alpha-2,3-sialyltransferase 6	16	58.4702	1.655			0.322	4.82e-05
1193	ENSMUST00000097275	liver.int.EAA	Prkce	protein kinase C, epsilon	17	86.1678	1.846			0.322	4.83e-05
1194	ENSMUST00000036372	liver.int.EAA	Chsy1	chondroitin sulfate synthase 1	7	66.1095	1.281			0.322	4.83e-05
1195	ENSMUST00000034846	liver.int.EAA	1700017B05Rik	RIKEN cDNA 1700017B05 gene	9	57.2523	1.74			0.322	4.84e-05
1196	ENSMUST00000079716	liver.int.EAA	Rpl17	ribosomal protein L17 (60S)	18	75.0005	8.152			-0.322	4.85e-05
1197	ENSMUST00000100001	liver.int.EAA	Dlg1	discs, large homolog 1 (Drosophila)	16	31.6639	3.239			0.322	4.85e-05
1198	ENSMUST00000113623	pan.EAA/liver.int.EAA	Glb1l	galactosidase, beta 1-like	1	75.1993	0.946	0.285	0.000361	0.322	4.86e-05
1199	ENSMUST00000147337	liver.int.EAA	Mapkap1	mitogen-activated protein kinase associated protein 1	2	34.4072	3.352			0.322	4.87e-05
1200	ENSMUST00000120094	liver.int.EAA	Rpl9	ribosomal protein L9	5	65.3885	8.127			-0.322	4.89e-05
1201	ENSMUST00000114358	liver.int.EAA	St3gal6	ST3 beta-galactoside alpha-2,3-sialyltransferase 6	16	58.4698	1.61			0.322	4.9e-05
1202	ENSMUST00000059580	liver.int.EAA	Setd8	SET domain containing (lysine methyltransferase) 8	5	124.44	3.248			0.322	4.9e-05
1203	ENSMUST00000018727	liver.int.EAA	G3bp1	GTPase activating protein (SH3 domain) binding protein 1	11	55.4697	3.176			0.322	4.92e-05
1204	ENSMUST00000012331	pan.EAA/liver.int.EAA	Mogat1	monoacylglycerol O-acyltransferase 1	1	78.5119	0.556	0.306	0.000121	0.322	4.94e-05
1205	ENSMUST00000170242	liver.int.EAA	Myo9b	myosin IXb	8	71.2727	2.382			0.322	4.95e-05
1206	ENSMUST00000106237	pan.EAA/liver.int.EAA	Itgad	integrin, alpha D	7	128.154	0.09	0.331	2.93e-05	0.322	4.97e-05
1207	ENSMUST00000030811	liver.int.EAA	Errfi1	ERBB receptor feedback inhibitor 1	4	150.855	7.606			0.322	4.97e-05
1208	ENSMUST00000169838	liver.int.EAA	Tiam2	T cell lymphoma invasion and metastasis 2	17	3.32657	0.938			0.322	4.98e-05
1209	ENSMUST00000107985	liver.int.EAA	Postn	periostin, osteoblast specific factor	3	54.3611	1.868			0.322	4.99e-05
1210	ENSMUST00000204702	liver.int.EAA	Hspa4l	heat shock protein 4 like	3	40.7454	1.193			0.322	4.99e-05
1211	ENSMUST00000043915	pan.EAA/liver.int.EAA	Serpina12	serine (or cysteine) peptidase inhibitor, clade A (alpha-1 antiproteinase, antitrypsin), member 12	12	104.029	1.758	0.435	1.99e-08	0.322	5e-05
1212	ENSMUST00000117958	liver.int.EAA	Nde1	nuclear distribution gene E homolog 1 (A nidulans)	16	14.1633	3.078			0.322	5e-05
1213	ENSMUST00000033051	pan.EAA/liver.int.EAA	Itgad	integrin, alpha D	7	128.174	0.093	0.334	2.5e-05	0.322	5.01e-05
1214	ENSMUST00000020397	liver.int.EAA	Snrpd3	small nuclear ribonucleoprotein D3	10	75.5175	3.581			-0.322	5.01e-05
1215	ENSMUST00000108673	liver.int.EAA	Myh10	myosin, heavy polypeptide 10, non-muscle	11	68.6921	0.657			0.322	5.02e-05
1216	ENSMUST00000023987	pan.EAA/liver.int.EAA	Epb4.2	erythrocyte protein band 4.2	2	121.024	0.023	0.295	0.000215	0.322	5.04e-05
1217	ENSMUST00000102667	liver.int.EAA	Smcr8	Smith-Magenis syndrome chromosome region, candidate 8 homolog (human)	11	60.7775	1.906			0.322	5.04e-05
1218	ENSMUST00000102503	liver.int.EAA	Mrto4	mRNA turnover 4, homolog (S. cerevisiae)	4	139.347	3.754			-0.322	5.05e-05
1219	ENSMUST00000064477	liver.int.EAA	Dlg1	discs, large homolog 1 (Drosophila)	16	31.664	3.253			0.322	5.06e-05
1220	ENSMUST00000073012	liver.int.EAA	Postn	periostin, osteoblast specific factor	3	54.3611	1.873			0.321	5.11e-05
1221	ENSMUST00000120940	liver.int.EAA	Snap47	synaptosomal-associated protein, 47	11	59.4071	4.708			0.321	5.12e-05
1222	ENSMUST00000099444	liver.int.EAA	Fancc	Fanconi anemia, complementation group C	13	63.3121	1.289			0.321	5.12e-05
1223	ENSMUST00000117373	liver.int.EAA	Postn	periostin, osteoblast specific factor	3	54.3611	1.895			0.321	5.17e-05
1224	ENSMUST00000031750	liver.int.EAA	Arhgef5	Rho guanine nucleotide exchange factor (GEF) 5	6	43.2656	1.977			0.321	5.18e-05
1225	ENSMUST00000160455	liver.int.EAA	Hps1	Hermansky-Pudlak syndrome 1 homolog (human)	19	42.7552	2.361			0.321	5.18e-05
1226	ENSMUST00000081564	liver.int.EAA	Postn	periostin, osteoblast specific factor	3	54.3611	1.825			0.321	5.19e-05
1227	ENSMUST00000015481	liver.int.EAA	Endog	endonuclease G	2	30.1715	5.745			-0.321	5.21e-05
1228	ENSMUST00000129773	pan.EAA/liver.int.EAA	Fam187b	family with sequence similarity 187, member B	7	30.9738	1.031	0.302	0.00015	0.321	5.23e-05
1229	ENSMUST00000102478	pan.EAA/liver.int.EAA	Aldoc	aldolase C, fructose-bisphosphate	11	78.3242	2.833	-0.283	0.000394	-0.321	5.26e-05
1230	ENSMUST00000039259	liver.int.EAA	Agap2	ArfGAP with GTPase domain, ankyrin repeat and PH domain 2	10	127.079	0.574			0.321	5.26e-05
1231	ENSMUST00000114086	liver.int.EAA	Klf7	Kruppel-like factor 7 (ubiquitous)	1	64.0294	1.029			0.321	5.29e-05
1232	ENSMUST00000190581	liver.int.EAA	C330022C24Rik	RIKEN cDNA C330022C24 gene	7	140.837	4.399			-0.321	5.32e-05
1233	ENSMUST00000172035	liver.int.EAA	Gemin5	gem (nuclear organelle) associated protein 5	11	58.12	1.438			0.321	5.32e-05
1234	ENSMUST00000115371	liver.int.EAA	Rnps1	RNA binding protein with serine rich domain 1	17	24.4147	3.306			0.321	5.33e-05
1235	ENSMUST00000019722	liver.int.EAA	Ubxn6	UBX domain protein 6	17	56.067	4.549			-0.321	5.37e-05
1236	ENSMUST00000034915	liver.int.EAA	Ctsh	cathepsin H	9	90.0543	7.44			-0.32	5.37e-05
1237	ENSMUST00000070736	liver.int.EAA	Adcyap1r1	adenylate cyclase activating polypeptide 1 receptor 1	6	55.452	0.348			0.32	5.37e-05
1238	ENSMUST00000110855	liver.int.EAA	Lpgat1	lysophosphatidylglycerol acyltransferase 1	1	191.718	4.483			0.32	5.4e-05
1239	ENSMUST00000133630	pan.EAA/liver.int.EAA	R74862	expressed sequence R74862	7	143.022	1.689	0.28	0.000448	0.32	5.41e-05
1240	ENSMUST00000027529	liver.int.EAA	Rab17	RAB17, member RAS oncogene family	1	90.9581	3.912			-0.32	5.41e-05
1241	ENSMUST00000045011	liver.int.EAA	Atrip	ATR interacting protein	9	109.06	1.824			0.32	5.41e-05
1242	ENSMUST00000032107	liver.int.EAA	Kbtbd8	kelch repeat and BTB (POZ) domain containing 8	6	95.1177	0.282			0.32	5.43e-05
1243	ENSMUST00000111760	liver.int.EAA	Nckap1	NCK-associated protein 1	2	80.5005	4.094			0.32	5.44e-05
1244	ENSMUST00000028386	liver.int.EAA	Nckap1	NCK-associated protein 1	2	80.5005	4.131			0.32	5.46e-05
1245	ENSMUST00000088512	liver.int.EAA	Rnps1	RNA binding protein with serine rich domain 1	17	24.4147	3.209			0.32	5.49e-05
1246	ENSMUST00000075523	liver.int.EAA	Bglap3	bone gamma-carboxyglutamate protein 3	3	88.3686	0.399			0.32	5.5e-05
1247	ENSMUST00000087600	liver.int.EAA	Gda	guanine deaminase	19	21.3913	2.533			0.32	5.51e-05
1248	ENSMUST00000096766	liver.int.EAA	Eml4	echinoderm microtubule associated protein like 4	17	83.3509	1.721			0.32	5.51e-05
1249	ENSMUST00000097902	liver.int.EAA	Ppt1	palmitoyl-protein thioesterase 1	4	122.836	3.228			0.32	5.53e-05
1250	ENSMUST00000120595	liver.int.EAA	Eml2	echinoderm microtubule associated protein like 2	7	19.1812	2.737			0.32	5.55e-05
1251	ENSMUST00000162333	pan.EAA/liver.int.EAA	Mas1	MAS1 oncogene	17	12.8411	0.104	0.345	1.26e-05	0.32	5.58e-05
1252	ENSMUST00000065906	liver.int.EAA	Ggcx	gamma-glutamyl carboxylase	6	72.4143	4.292			0.32	5.59e-05
1253	ENSMUST00000027581	liver.int.EAA	Gpr39	G protein-coupled receptor 39	1	125.677	1.697			0.32	5.61e-05
1254	ENSMUST00000066155	liver.int.EAA	Adal	adenosine deaminase-like	2	121.142	1.985			0.32	5.63e-05
1255	ENSMUST00000049016	liver.int.EAA	Zfp532	zinc finger protein 532	18	65.5802	0.48			0.32	5.66e-05
1256	ENSMUST00000036111	liver.int.EAA	Mrps35	mitochondrial ribosomal protein S35	6	147.043	2.602			-0.319	5.69e-05
1257	ENSMUST00000180657	liver.int.EAA	Senp1	SUMO1/sentrin specific peptidase 1	15	98.0417	0.983			0.319	5.69e-05
1258	ENSMUST00000084296	pan.EAA/liver.int.EAA	Cdca8	cell division cycle associated 8	4	124.918	0.58	0.263	0.00101	0.319	5.7e-05
1259	ENSMUST00000181739	liver.int.EAA	4930556M19Rik	RIKEN cDNA 4930556M19 gene	15	10.7171	1.097			0.319	5.7e-05
1260	ENSMUST00000114897	liver.int.EAA	Atp5c1	ATP synthase, H+ transporting, mitochondrial F1 complex, gamma polypeptide 1	2	10.056	7.011			-0.319	5.74e-05
1261	ENSMUST00000113524	pan.EAA/liver.int.EAA	Mogat1	monoacylglycerol O-acyltransferase 1	1	78.5112	0.541	0.308	0.000106	0.319	5.75e-05
1262	ENSMUST00000114896	liver.int.EAA	Atp5c1	ATP synthase, H+ transporting, mitochondrial F1 complex, gamma polypeptide 1	2	10.056	6.444			-0.319	5.75e-05
1263	ENSMUST00000020630	liver.int.EAA	Hspa4	heat shock protein 4	11	53.2598	4.316			0.319	5.77e-05
1264	ENSMUST00000051995	pan.EAA/liver.int.EAA	Jak3	Janus kinase 3	8	71.6763	3.078	0.264	0.000994	0.319	5.8e-05
1265	ENSMUST00000020538	liver.int.EAA	Xpo1	exportin 1, CRM1 homolog (yeast)	11	23.256	2.103			0.319	5.81e-05
1266	ENSMUST00000201700	liver.int.EAA	2022-09-11	septin 11	5	1900-04-02 02:14:32	1.456			0.319	5.83e-05
1267	ENSMUST00000157368	liver.int.EAA	Mir1982	microRNA 1982	10	80.8288	5.23			-0.319	5.85e-05
1268	ENSMUST00000005487	liver.int.EAA	Txn2	thioredoxin 2	15	77.915	6.87			-0.319	5.86e-05
1269	ENSMUST00000102869	liver.int.EAA	Xpo1	exportin 1, CRM1 homolog (yeast)	11	23.2561	1.974			0.319	5.86e-05
1270	ENSMUST00000112363	liver.int.EAA	Eml4	echinoderm microtubule associated protein like 4	17	83.3509	1.751			0.319	5.87e-05
1271	ENSMUST00000004316	pan.EAA/liver.int.EAA	Psap	prosaposin	10	60.2776	8.079	0.28	0.000453	0.319	5.9e-05
1272	ENSMUST00000177779	pan.EAA/liver.int.EAA	Psap	prosaposin	10	60.2776	8.077	0.28	0.000453	0.319	5.9e-05
1273	ENSMUST00000105465	pan.EAA/liver.int.EAA	Psap	prosaposin	10	60.2776	8.083	0.28	0.000454	0.319	5.9e-05
1274	ENSMUST00000179238	pan.EAA/liver.int.EAA	Psap	prosaposin	10	60.2776	8.077	0.28	0.000455	0.319	5.9e-05
1275	ENSMUST00000161410	pan.EAA/liver.int.EAA	Wars	tryptophanyl-tRNA synthetase	12	108.86	2.815	0.271	0.000707	0.319	5.91e-05
1276	ENSMUST00000097299	liver.int.EAA	Crb3	crumbs family member 3	17	57.0622	3.661			-0.319	5.91e-05
1277	ENSMUST00000048502	liver.int.EAA	Eml2	echinoderm microtubule associated protein like 2	7	19.1812	2.688			0.319	5.91e-05
1278	ENSMUST00000115205	liver.int.EAA	Dlg1	discs, large homolog 1 (Drosophila)	16	31.6634	3.273			0.319	5.93e-05
1279	ENSMUST00000143275	pan.EAA/liver.int.EAA	Synpo	synaptopodin	18	60.6002	1.272	0.255	0.00144	0.319	5.94e-05
1280	ENSMUST00000111774	liver.int.EAA	Xpr1	xenotropic and polytropic retrovirus receptor 1	1	155.283	1.935			0.319	5.94e-05
1281	ENSMUST00000167549	liver.int.EAA	Endod1	endonuclease domain containing 1	9	14.354	1.148			0.319	5.94e-05
1282	ENSMUST00000109848	pan.EAA/liver.int.EAA	Wars	tryptophanyl-tRNA synthetase	12	108.86	2.786	0.271	0.000693	0.319	5.97e-05
1283	ENSMUST00000115027	liver.int.EAA	Cald1	caldesmon 1	6	34.5986	5.466			0.319	5.97e-05
1284	ENSMUST00000170033	liver.int.EAA	Lig4	ligase IV, DNA, ATP-dependent	8	9.97088	0.842			0.319	5.98e-05
1285	ENSMUST00000108374	pan.EAA/liver.int.EAA	Sdcbp	syndecan binding protein	4	6.36571	3.5	0.25	0.00186	0.319	6e-05
1286	ENSMUST00000120847	liver.int.EAA	Lrrc8d	leucine rich repeat containing 8D	5	105.701	3.323			0.319	6.01e-05
1287	ENSMUST00000106962	liver.int.EAA	Cdc27	cell division cycle 27	11	104.505	1.826			0.318	6.02e-05
1288	ENSMUST00000177424	liver.int.EAA	Satb2	special AT-rich sequence binding protein 2	1	56.794	0.206			0.318	6.03e-05
1289	ENSMUST00000085060	liver.int.EAA	Amigo3	adhesion molecule with Ig like domain 3	9	108.053	0.681			0.318	6.04e-05
1290	ENSMUST00000165878	pan.EAA/liver.int.EAA	Psap	prosaposin	10	60.2845	8.113	0.281	0.000435	0.318	6.06e-05
1291	ENSMUST00000138502	liver.int.EAA	Rps20	ribosomal protein S20	4	3.83133	5.232			-0.318	6.06e-05
1292	ENSMUST00000028799	pan.EAA/liver.int.EAA	Casc5	cancer susceptibility candidate 5	2	119.047	0.033	0.279	0.000477	0.318	6.08e-05
1293	ENSMUST00000095950	liver.int.EAA	Vti1a	vesicle transport through interaction with t-SNAREs 1A	19	55.3163	2.119			0.318	6.1e-05
1294	ENSMUST00000029546	pan.EAA/liver.int.EAA	Jtb	jumping translocation breakpoint	3	90.2316	5.224	-0.294	0.000231	-0.318	6.12e-05
1295	ENSMUST00000202427	liver.int.EAA	RP23-450O11.3	0	16	5.00837	2.372			0.318	6.12e-05
1296	ENSMUST00000006701	liver.int.EAA	Tmem110	transmembrane protein 110	14	30.8256	2.306			0.318	6.13e-05
1297	ENSMUST00000073600	liver.int.EAA	Errfi1	ERBB receptor feedback inhibitor 1	4	150.854	7.407			0.318	6.14e-05
1298	ENSMUST00000099512	liver.int.EAA	Hlcs	holocarboxylase synthetase (biotin-	16	94.1293	2.401			0.318	6.16e-05
1299	ENSMUST00000033050	liver.int.EAA	Lyve1	lymphatic vessel endothelial hyaluronan receptor 1	7	110.851	1.732			0.318	6.17e-05
1300	ENSMUST00000026887	liver.int.EAA	Atp5c1	ATP synthase, H+ transporting, mitochondrial F1 complex, gamma polypeptide 1	2	10.056	7.142			-0.318	6.18e-05
1301	ENSMUST00000092512	pan.EAA/liver.int.EAA	P4ha1	procollagen-proline, 2-oxoglutarate 4-dioxygenase (proline 4-hydroxylase), alpha 1 polypeptide	10	59.3234	2.141	0.315	7.36e-05	0.318	6.2e-05
1302	ENSMUST00000005954	liver.int.EAA	Bloc1s6	biogenesis of lysosomal organelles complex-1, subunit 6, pallidin	2	122.739	2.109			0.318	6.2e-05
1303	ENSMUST00000163083	pan.EAA/liver.int.EAA	Cyb5a	cytochrome b5 type A (microsomal)	18	84.8519	9.513	-0.313	8.38e-05	-0.318	6.21e-05
1304	ENSMUST00000164713	liver.int.EAA	Ston2	stonin 2	12	91.6415	1.274			0.318	6.21e-05
1305	ENSMUST00000102696	liver.int.EAA	Rps8	ribosomal protein S8	4	117.154	7.89			-0.318	6.22e-05
1306	ENSMUST00000115383	liver.int.EAA	Cped1	cadherin-like and PC-esterase domain containing 1	6	21.9859	2.692			0.318	6.22e-05
1307	ENSMUST00000165020	pan.EAA/liver.int.EAA	Mas1	MAS1 oncogene	17	12.8411	0.103	0.346	1.18e-05	0.318	6.23e-05
1308	ENSMUST00000197431	pan.EAA/liver.int.EAA	Gpr12	G-protein coupled receptor 12	5	146.583	1.244	0.289	0.000295	0.318	6.25e-05
1309	ENSMUST00000016771	liver.int.EAA	Myh9	myosin, heavy polypeptide 9, non-muscle	15	77.7606	4.585			0.318	6.25e-05
1310	ENSMUST00000174861	pan.EAA/liver.int.EAA	Gm20531	predicted gene 20531	6	124.732	1.96	0.273	0.000649	0.318	6.28e-05
1311	ENSMUST00000114374	liver.int.EAA	Crhr2	corticotropin releasing hormone receptor 2	6	55.0912	0.299			-0.318	6.28e-05
1312	ENSMUST00000107542	liver.int.EAA	Bglap3	bone gamma-carboxyglutamate protein 3	3	88.3686	0.247			0.318	6.28e-05
1313	ENSMUST00000163717	liver.int.EAA	Rnps1	RNA binding protein with serine rich domain 1	17	24.4147	3.157			0.318	6.28e-05
1314	ENSMUST00000175265	liver.int.EAA	Gm24157	predicted gene, 24157	11	52.099	6.148			0.318	6.29e-05
1315	ENSMUST00000032732	pan.EAA/liver.int.EAA	Apba2	amyloid beta (A4) precursor protein-binding, family A, member 2	7	64.5017	0.115	0.242	0.00254	0.318	6.3e-05
1316	ENSMUST00000161521	liver.int.EAA	Atrip	ATR interacting protein	9	109.06	1.893			0.318	6.3e-05
1317	ENSMUST00000112025	liver.int.EAA	2310009B15Rik	RIKEN cDNA 2310009B15 gene	1	138.852	2.936			-0.318	6.33e-05
1318	ENSMUST00000109269	liver.int.EAA	Zmynd8	zinc finger, MYND-type containing 8	2	165.785	1.888			0.318	6.33e-05
1319	ENSMUST00000034984	pan.EAA/liver.int.EAA	Rasa2	RAS p21 protein activator 2	9	96.5393	0.514	0.279	0.000476	0.318	6.34e-05
1320	ENSMUST00000098574	liver.int.EAA	Rap1gds1	RAP1, GTP-GDP dissociation stimulator 1	3	138.926	2.687			0.318	6.34e-05
1321	ENSMUST00000032946	liver.int.EAA	Rab6a	RAB6A, member RAS oncogene family	7	100.608	4.206			0.318	6.35e-05
1322	ENSMUST00000121870	liver.int.EAA	Ppt1	palmitoyl-protein thioesterase 1	4	122.836	3.467			0.317	6.36e-05
1323	ENSMUST00000196280	liver.int.EAA	Rap1gds1	RAP1, GTP-GDP dissociation stimulator 1	3	138.926	2.711			0.318	6.36e-05
1324	ENSMUST00000096119	liver.int.EAA	Asah2	N-acylsphingosine amidohydrolase 2	19	31.9847	2.383			0.318	6.36e-05
1325	ENSMUST00000105366	liver.int.EAA	Atp5d	ATP synthase, H+ transporting, mitochondrial F1 complex, delta subunit	10	80.1424	8.23			-0.317	6.37e-05
1326	ENSMUST00000099192	liver.int.EAA	Pofut1	protein O-fucosyltransferase 1	2	153.242	2.099			0.317	6.38e-05
1327	ENSMUST00000089414	pan.EAA/liver.int.EAA	Kctd17	potassium channel tetramerisation domain containing 17	15	78.4286	1.88	0.275	0.000574	0.317	6.39e-05
1328	ENSMUST00000044694	liver.int.EAA	Ttc36	tetratricopeptide repeat domain 36	9	44.7994	9.454			-0.317	6.39e-05
1329	ENSMUST00000045008	liver.int.EAA	Cml2	camello-like 2	6	85.8654	7.704			0.317	6.39e-05
1330	ENSMUST00000065692	liver.int.EAA	Ap2b1	adaptor-related protein complex 2, beta 1 subunit	11	83.3028	3.192			0.317	6.41e-05
1331	ENSMUST00000078816	liver.int.EAA	9130023H24Rik	RIKEN cDNA 9130023H24 gene	7	128.234	1.275			0.317	6.41e-05
1332	ENSMUST00000034600	liver.int.EAA	Mpzl2	myelin protein zero-like 2	9	45.0424	3.521			0.317	6.43e-05
1333	ENSMUST00000098252	liver.int.EAA	Rab6a	RAB6A, member RAS oncogene family	7	100.608	4.242			0.317	6.43e-05
1334	ENSMUST00000114171	pan.EAA/liver.int.EAA	Atp6ap1	ATPase, H+ transporting, lysosomal accessory protein 1	X	74.2972	4.753	0.255	0.00149	0.317	6.46e-05
1335	ENSMUST00000029814	liver.int.EAA	Manba	mannosidase, beta A, lysosomal	3	135.486	2.221			0.317	6.48e-05
1336	ENSMUST00000019231	pan.EAA/liver.int.EAA	Atp6ap1	ATPase, H+ transporting, lysosomal accessory protein 1	X	74.2971	4.733	0.255	0.00148	0.317	6.51e-05
1337	ENSMUST00000190957	liver.int.EAA	Dopey1	dopey family member 1	9	86.4672	1.2			0.317	6.51e-05
1338	ENSMUST00000020974	pan.EAA/liver.int.EAA	Id2	inhibitor of DNA binding 2	12	25.0938	6.164	-0.304	0.000134	-0.317	6.52e-05
1339	ENSMUST00000028866	liver.int.EAA	Zc3h8	zinc finger CCCH type containing 8	2	128.926	1.076			-0.317	6.52e-05
1340	ENSMUST00000105989	liver.int.EAA	Brsk2	BR serine/threonine kinase 2	7	141.95	0.064			0.317	6.52e-05
1341	ENSMUST00000041425	pan.EAA/liver.int.EAA	Negr1	neuronal growth regulator 1	3	156.562	0.031	0.295	0.000213	0.317	6.53e-05
1342	ENSMUST00000122210	liver.int.EAA	Pfn2	profilin 2	3	57.8431	1.319			-0.317	6.53e-05
1343	ENSMUST00000179709	liver.int.EAA	Micu1	mitochondrial calcium uptake 1	10	59.7026	4.007			0.317	6.54e-05
1344	ENSMUST00000115103	liver.int.EAA	Gria3	glutamate receptor, ionotropic, AMPA3 (alpha 3)	X	41.4011	0.209			0.317	6.55e-05
1345	ENSMUST00000109266	liver.int.EAA	Zmynd8	zinc finger, MYND-type containing 8	2	165.784	2.347			0.317	6.57e-05
1346	ENSMUST00000173744	liver.int.EAA	Kif3a	kinesin family member 3A	11	53.5674	1.168			0.317	6.59e-05
1347	ENSMUST00000161913	liver.int.EAA	Gfm2	G elongation factor, mitochondrial 2	13	97.138	3.383			0.317	6.6e-05
1348	ENSMUST00000029796	liver.int.EAA	Rap1gds1	RAP1, GTP-GDP dissociation stimulator 1	3	138.926	2.774			0.317	6.6e-05
1349	ENSMUST00000018050	liver.int.EAA	Zmynd8	zinc finger, MYND-type containing 8	2	165.785	2.326			0.317	6.61e-05
1350	ENSMUST00000006171	liver.int.EAA	Prg4	proteoglycan 4 (megakaryocyte stimulating factor, articular superficial zone protein)	1	150.449	3.818			0.317	6.66e-05
1351	ENSMUST00000122235	liver.int.EAA	Vps8	vacuolar protein sorting 8 homolog (S. cerevisiae)	16	21.4232	0.821			0.317	6.67e-05
1352	ENSMUST00000202258	liver.int.EAA	G3bp2	GTPase activating protein (SH3 domain) binding protein 2	5	92.0545	3.597			0.317	6.67e-05
1353	ENSMUST00000058093	pan.EAA/liver.int.EAA	Fam187b	family with sequence similarity 187, member B	7	30.977	0.666	0.303	0.000139	0.317	6.69e-05
1354	ENSMUST00000102942	pan.EAA/liver.int.EAA	Psd4	pleckstrin and Sec7 domain containing 4	2	24.3676	0.789	0.249	0.00194	0.317	6.7e-05
1355	ENSMUST00000003156	liver.int.EAA	Atp5d	ATP synthase, H+ transporting, mitochondrial F1 complex, delta subunit	10	80.1423	8.004			-0.317	6.7e-05
1356	ENSMUST00000117338	liver.int.EAA	Eml2	echinoderm microtubule associated protein like 2	7	19.1764	2.45			0.317	6.71e-05
1357	ENSMUST00000121115	liver.int.EAA	Fuom	fucose mutarotase	7	140.101	3.563			-0.317	6.72e-05
1358	ENSMUST00000017534	pan.EAA/liver.int.EAA	Aldoc	aldolase C, fructose-bisphosphate	11	78.323	2.304	-0.279	0.00047	-0.316	6.73e-05
1359	ENSMUST00000157067	pan.EAA/liver.int.EAA	Rps6ka1	ribosomal protein S6 kinase polypeptide 1	4	133.848	2.966	0.281	0.000432	0.316	6.75e-05
1360	ENSMUST00000022097	liver.int.EAA	Ndufs6	NADH dehydrogenase (ubiquinone) Fe-S protein 6	13	73.3199	7.119			-0.316	6.75e-05
1361	ENSMUST00000057330	liver.int.EAA	Kif3a	kinesin family member 3A	11	53.5674	1.158			0.316	6.75e-05
1362	ENSMUST00000066039	liver.int.EAA	Cstf2t	cleavage stimulation factor, 3' pre-RNA subunit 2, tau	19	31.0828	2.835			0.316	6.75e-05
1363	ENSMUST00000114608	liver.int.EAA	Etl4	enhancer trap locus 4	2	20.7373	0.986			0.316	6.78e-05
1364	ENSMUST00000177633	liver.int.EAA	Zmynd8	zinc finger, MYND-type containing 8	2	165.784	2.347			0.316	6.78e-05
1365	ENSMUST00000105367	liver.int.EAA	Atp5d	ATP synthase, H+ transporting, mitochondrial F1 complex, delta subunit	10	80.1415	7.41			-0.316	6.79e-05
1366	ENSMUST00000162367	liver.int.EAA	Prg4	proteoglycan 4 (megakaryocyte stimulating factor, articular superficial zone protein)	1	150.45	4.112			0.316	6.79e-05
1367	ENSMUST00000170272	liver.int.EAA	Zmynd8	zinc finger, MYND-type containing 8	2	165.784	2.348			0.316	6.79e-05
1368	ENSMUST00000030690	liver.int.EAA	Cdca8	cell division cycle associated 8	4	124.919	0.468			0.316	6.81e-05
1369	ENSMUST00000024956	liver.int.EAA	Rhoq	ras homolog gene family, member Q	17	86.9631	1.963			0.316	6.83e-05
1370	ENSMUST00000034987	liver.int.EAA	Dopey1	dopey family member 1	9	86.4854	1.216			0.316	6.85e-05
1371	ENSMUST00000180036	liver.int.EAA	Oaz1	ornithine decarboxylase antizyme 1	10	80.8267	9.062			-0.316	6.86e-05
1372	ENSMUST00000060987	liver.int.EAA	Oaz1	ornithine decarboxylase antizyme 1	10	80.8267	9.025			-0.316	6.87e-05
1373	ENSMUST00000023150	liver.int.EAA	1810013L24Rik	RIKEN cDNA 1810013L24 gene	16	8.8301	2.928			0.316	6.87e-05
1374	ENSMUST00000165117	liver.int.EAA	Cdk6	cyclin-dependent kinase 6	5	3.34389	1.413			0.316	6.87e-05
1375	ENSMUST00000099084	liver.int.EAA	Zmynd8	zinc finger, MYND-type containing 8	2	165.784	2.316			0.316	6.88e-05
1376	ENSMUST00000049503	liver.int.EAA	Eml4	echinoderm microtubule associated protein like 4	17	83.3509	1.764			0.316	6.89e-05
1377	ENSMUST00000050850	liver.int.EAA	Trim32	tripartite motif-containing 32	4	65.605	1.808			0.316	6.9e-05
1378	ENSMUST00000163545	liver.int.EAA	Rbm26	RNA binding motif protein 26	14	105.115	1.851			0.316	6.94e-05
1379	ENSMUST00000002914	pan.EAA/liver.int.EAA	Chaf1a	chromatin assembly factor 1, subunit A (p150)	17	56.0404	0.568	0.245	0.00232	0.316	6.98e-05
1380	ENSMUST00000002452	liver.int.EAA	Ndufa11	NADH dehydrogenase (ubiquinone) 1 alpha subcomplex 11	17	56.7178	4.078			-0.316	6.98e-05
1381	ENSMUST00000107366	liver.int.EAA	Trim32	tripartite motif-containing 32	4	65.605	1.809			0.316	6.98e-05
1382	ENSMUST00000105466	pan.EAA/liver.int.EAA	P4ha1	procollagen-proline, 2-oxoglutarate 4-dioxygenase (proline 4-hydroxylase), alpha 1 polypeptide	10	59.3234	1.988	0.312	8.6e-05	0.316	7.02e-05
1383	ENSMUST00000117892	liver.int.EAA	Slc48a1	solute carrier family 48 (heme transporter), member 1	15	97.7844	4.392			0.316	7.02e-05
1384	ENSMUST00000105645	liver.int.EAA	A430005L14Rik	RIKEN cDNA A430005L14 gene	4	153.957	4.623			-0.316	7.03e-05
1385	ENSMUST00000163193	liver.int.EAA	Hlcs	holocarboxylase synthetase (biotin-	16	94.1292	2.383			0.316	7.06e-05
1386	ENSMUST00000022124	pan.EAA/liver.int.EAA	Cd180	CD180 antigen	13	102.694	0.872	0.336	2.12e-05	0.316	7.07e-05
1387	ENSMUST00000100647	liver.int.EAA	Clip2	CAP-GLY domain containing linker protein 2	5	134.489	1.099			0.316	7.09e-05
1388	ENSMUST00000088113	liver.int.EAA	Zmynd8	zinc finger, MYND-type containing 8	2	165.786	2.366			0.315	7.14e-05
1389	ENSMUST00000043624	liver.int.EAA	Med13	mediator complex subunit 13	11	86.267	1.601			0.315	7.15e-05
1390	ENSMUST00000061826	liver.int.EAA	B3galnt1	UDP-GalNAc:betaGlcNAc beta 1,3-galactosaminyltransferase, polypeptide 1	3	69.5742	0.973			-0.315	7.16e-05
1391	ENSMUST00000092880	liver.int.EAA	Tlcd1	TLC domain containing 1	11	78.1787	5.891			-0.315	7.19e-05
1392	ENSMUST00000115421	liver.int.EAA	Steap4	STEAP family member 4	5	7.96046	5.344			0.315	7.2e-05
1393	ENSMUST00000097530	liver.int.EAA	Mbd1	methyl-CpG binding domain protein 1	18	74.2683	3.161			0.315	7.2e-05
1394	ENSMUST00000056149	pan.EAA/liver.int.EAA	Abhd12	abhydrolase domain containing 12	2	150.832	4.068	0.348	1.03e-05	0.315	7.22e-05
1395	ENSMUST00000047903	liver.int.EAA	Colgalt1	collagen beta(1-O)galactosyltransferase 1	8	71.611	4.324			0.315	7.22e-05
1396	ENSMUST00000076316	pan.EAA/liver.int.EAA	Arhgap10	Rho GTPase activating protein 10	8	77.2504	0.807	0.25	0.0018	0.315	7.24e-05
1397	ENSMUST00000130184	liver.int.EAA	Gm16726	predicted gene, 16726	19	46.2645	1.855			0.315	7.25e-05
1398	ENSMUST00000027279	pan.EAA/liver.int.EAA	Nabp1	nucleic acid binding protein 1	1	51.4695	1.831	0.255	0.00149	0.315	7.28e-05
1399	ENSMUST00000115320	liver.int.EAA	Zfp800	zinc finger protein 800	6	28.2399	1.202			0.315	7.3e-05
1400	ENSMUST00000020023	liver.int.EAA	Reep3	receptor accessory protein 3	10	67.0092	3.925			0.315	7.3e-05
1401	ENSMUST00000036999	liver.int.EAA	Clip2	CAP-GLY domain containing linker protein 2	5	134.489	1.114			0.315	7.32e-05
1402	ENSMUST00000031349	liver.int.EAA	Snrnp35	small nuclear ribonucleoprotein 35 (U11/U12)	5	124.483	2.173			0.315	7.36e-05
1403	ENSMUST00000066037	liver.int.EAA	Bbx	bobby sox homolog (Drosophila)	16	50.1958	0.879			0.315	7.37e-05
1404	ENSMUST00000076349	liver.int.EAA	Gria3	glutamate receptor, ionotropic, AMPA3 (alpha 3)	X	41.4013	0.167			0.315	7.38e-05
1405	ENSMUST00000109408	liver.int.EAA	Ttpal	tocopherol (alpha) transfer protein-like	2	163.602	1.775			0.315	7.39e-05
1406	ENSMUST00000170139	liver.int.EAA	Spats2l	spermatogenesis associated, serine-rich 2-like	1	57.7747	0.515			0.315	7.39e-05
1407	ENSMUST00000033310	pan.EAA/liver.int.EAA	Mki67	antigen identified by monoclonal antibody Ki 67	7	135.69	0.344	0.249	0.00195	0.315	7.4e-05
1408	ENSMUST00000198008	pan.EAA/liver.int.EAA	Ccdc149	coiled-coil domain containing 149	5	52.3747	0.4	0.249	0.00188	0.315	7.41e-05
1409	ENSMUST00000109551	liver.int.EAA	Xpo1	exportin 1, CRM1 homolog (yeast)	11	23.256	2.128			0.315	7.41e-05
1410	ENSMUST00000049810	liver.int.EAA	Cxcr6	chemokine (C-X-C motif) receptor 6	9	123.806	0.547			-0.315	7.43e-05
1411	ENSMUST00000194105	liver.int.EAA	Gm36975	predicted gene, 36975	1	160.264	0.366			0.315	7.44e-05
1412	ENSMUST00000165134	liver.int.EAA	Sec23a	SEC23A (S. cerevisiae)	12	58.9597	4.397			0.315	7.44e-05
1413	ENSMUST00000033899	liver.int.EAA	Col4a2	collagen, type IV, alpha 2	8	11.3128	2.043			0.315	7.45e-05
1414	ENSMUST00000070173	liver.int.EAA	Pgpep1	pyroglutamyl-peptidase I	8	70.6464	3.809			0.315	7.46e-05
1415	ENSMUST00000021997	pan.EAA/liver.int.EAA	Rsl1	regulator of sex limited protein 1	13	67.1732	0.639	0.275	0.000594	0.315	7.48e-05
1416	ENSMUST00000166142	pan.EAA/liver.int.EAA	Kctd17	potassium channel tetramerisation domain containing 17	15	78.4286	1.388	0.259	0.00124	0.315	7.48e-05
1417	ENSMUST00000110070	pan.EAA/liver.int.EAA	9030617O03Rik	RIKEN cDNA 9030617O03 gene	12	100.779	3.263	0.321	5.27e-05	0.314	7.56e-05
1418	ENSMUST00000148654	liver.int.EAA	Gm15419	predicted gene 15419	8	11.3992	0.369			0.314	7.57e-05
1419	ENSMUST00000112624	liver.int.EAA	Oxsm	3-oxoacyl-ACP synthase, mitochondrial	14	16.2406	3.249			0.314	7.58e-05
1420	ENSMUST00000191823	liver.int.EAA	Clasp1	CLIP associating protein 1	1	118.482	1.328			0.314	7.58e-05
1421	ENSMUST00000105830	liver.int.EAA	Eif4g3	eukaryotic translation initiation factor 4 gamma, 3	4	137.993	2.668			0.314	7.62e-05
1422	ENSMUST00000039064	pan.EAA/liver.int.EAA	Fam124a	family with sequence similarity 124, member A	14	62.5557	1.828	0.318	6.27e-05	0.314	7.65e-05
1423	ENSMUST00000068563	liver.int.EAA	Acox3	acyl-Coenzyme A oxidase 3, pristanoyl	5	35.5831	2.245			0.314	7.67e-05
1424	ENSMUST00000060531	liver.int.EAA	Lrrc8d	leucine rich repeat containing 8D	5	105.7	3.364			0.314	7.67e-05
1425	ENSMUST00000148740	pan.EAA/liver.int.EAA	F730043M19Rik	RIKEN cDNA F730043M19 gene	12	33.1331	0.092	0.308	0.000108	0.314	7.68e-05
1426	ENSMUST00000038368	pan.EAA/liver.int.EAA	Id1	inhibitor of DNA binding 1	2	152.736	3.345	-0.253	0.00163	-0.314	7.7e-05
1427	ENSMUST00000024717	liver.int.EAA	Tbc1d5	TBC1 domain family, member 5	17	50.7331	1.752			0.314	7.7e-05
1428	ENSMUST00000171748	liver.int.EAA	Zbtb37	zinc finger and BTB domain containing 37	1	161.019	0.962			0.314	7.71e-05
1429	ENSMUST00000120272	liver.int.EAA	Depdc1a	DEP domain containing 1a	3	159.495	0.043			0.314	7.73e-05
1430	ENSMUST00000027684	pan.EAA/liver.int.EAA	Arl8a	ADP-ribosylation factor-like 8A	1	135.147	3.076	0.278	0.000503	0.314	7.77e-05
1431	ENSMUST00000037007	pan.EAA/liver.int.EAA	Evpl	envoplakin	11	116.221	0.418	0.24	0.00277	0.314	7.77e-05
1432	ENSMUST00000026120	liver.int.EAA	Bhlhe22	basic helix-loop-helix family, member e22	3	18.0542	0.114			0.314	7.77e-05
1433	ENSMUST00000107543	liver.int.EAA	Bglap3	bone gamma-carboxyglutamate protein 3	3	88.3686	0.364			0.314	7.79e-05
1434	ENSMUST00000059524	liver.int.EAA	Gm4737	predicted gene 4737	16	46.153	6.255			-0.314	7.8e-05
1435	ENSMUST00000084433	liver.int.EAA	Acer2	alkaline ceramidase 2	4	86.8744	1.815			0.314	7.8e-05
1436	ENSMUST00000110627	liver.int.EAA	Ppip5k1	diphosphoinositol pentakisphosphate kinase 1	2	121.311	0.786			0.314	7.82e-05
1437	ENSMUST00000106381	liver.int.EAA	Gm11744	predicted gene 11744	11	116.654	0.758			0.314	7.83e-05
1438	ENSMUST00000102924	liver.int.EAA	Trim14	tripartite motif-containing 14	4	46.5097	3.193			0.314	7.83e-05
1439	ENSMUST00000102711	liver.int.EAA	Gemin5	gem (nuclear organelle) associated protein 5	11	58.1213	1.565			0.314	7.84e-05
1440	ENSMUST00000050580	liver.int.EAA	Uqcrh	ubiquinol-cytochrome c reductase hinge protein	4	116.067	7.591			-0.314	7.87e-05
1441	ENSMUST00000002502	liver.int.EAA	Hltf	helicase-like transcription factor	3	20.0578	1.246			0.314	7.88e-05
1442	ENSMUST00000096433	liver.int.EAA	Deptor	DEP domain containing MTOR-interacting protein	15	55.1123	4.021			0.314	7.9e-05
1443	ENSMUST00000110856	liver.int.EAA	Lpgat1	lysophosphatidylglycerol acyltransferase 1	1	191.718	4.495			0.314	7.9e-05
1444	ENSMUST00000027421	liver.int.EAA	Trip12	thyroid hormone receptor interactor 12	1	84.7212	3.291			0.314	7.9e-05
1445	ENSMUST00000110628	liver.int.EAA	Ppip5k1	diphosphoinositol pentakisphosphate kinase 1	2	121.311	0.795			0.314	7.94e-05
1446	ENSMUST00000164302	liver.int.EAA	Spats2l	spermatogenesis associated, serine-rich 2-like	1	57.7748	0.544			0.314	7.94e-05
1447	ENSMUST00000178901	pan.EAA/liver.int.EAA	Zfp872	zinc finger protein 872	9	22.1882	0.174	0.304	0.000136	0.313	7.95e-05
1448	ENSMUST00000068031	pan.EAA/liver.int.EAA	Top2a	topoisomerase (DNA) II alpha	11	98.9929	0.457	0.251	0.00174	0.313	7.96e-05
1449	ENSMUST00000186465	liver.int.EAA	Trip12	thyroid hormone receptor interactor 12	1	84.7212	3.296			0.313	7.96e-05
1450	ENSMUST00000028800	liver.int.EAA	1700037H04Rik	RIKEN cDNA 1700037H04 gene	2	131.147	2.876			0.313	7.97e-05
1451	ENSMUST00000100841	liver.int.EAA	Eps8	epidermal growth factor receptor pathway substrate 8	6	137.478	0.886			0.313	7.98e-05
1452	ENSMUST00000181653	liver.int.EAA	Gm26850	predicted gene, 26850	3	63.9636	3.149			0.313	7.98e-05
1453	ENSMUST00000109256	liver.int.EAA	Pphln1	periphilin 1	15	93.3983	2.009			0.313	7.99e-05
1454	ENSMUST00000179172	liver.int.EAA	Oaz1	ornithine decarboxylase antizyme 1	10	80.8267	9.484			-0.313	8e-05
1455	ENSMUST00000160180	pan.EAA/liver.int.EAA	Cyb5a	cytochrome b5 type A (microsomal)	18	84.8513	8.898	-0.32	5.4e-05	-0.313	8.03e-05
1456	ENSMUST00000114229	liver.int.EAA	Cxadr	coxsackie virus and adenovirus receptor	16	78.3018	2.657			0.313	8.03e-05
1457	ENSMUST00000114485	liver.int.EAA	Il1rn	interleukin 1 receptor antagonist	2	24.3453	2.396			0.313	8.05e-05
1458	ENSMUST00000163239	liver.int.EAA	Spats2l	spermatogenesis associated, serine-rich 2-like	1	57.7744	0.501			0.313	8.07e-05
1459	ENSMUST00000114059	liver.int.EAA	Pls3	plastin 3 (T-isoform)	X	75.7857	4.268			0.313	8.08e-05
1460	ENSMUST00000198884	pan.EAA/liver.int.EAA	Ltf	lactotransferrin	9	111.019	0.647	0.267	0.00084	0.313	8.12e-05
1461	ENSMUST00000068457	liver.int.EAA	Pphln1	periphilin 1	15	93.3983	1.995			0.313	8.12e-05
1462	ENSMUST00000099373	liver.int.EAA	Cnnm2	cyclin M2	19	46.7616	2.103			0.313	8.12e-05
1463	ENSMUST00000106701	liver.int.EAA	Scp2	sterol carrier protein 2, liver	4	108.045	10.367			0.313	8.12e-05
1464	ENSMUST00000133012	liver.int.EAA	Tmem80	transmembrane protein 80	7	141.328	2.222			0.313	8.13e-05
1465	ENSMUST00000114057	liver.int.EAA	Pls3	plastin 3 (T-isoform)	X	75.7857	4.26			0.313	8.13e-05
1466	ENSMUST00000033547	liver.int.EAA	Pls3	plastin 3 (T-isoform)	X	75.7857	4.228			0.313	8.14e-05
1467	ENSMUST00000114058	liver.int.EAA	Pls3	plastin 3 (T-isoform)	X	75.7857	4.317			0.313	8.14e-05
1468	ENSMUST00000025989	liver.int.EAA	Tm9sf3	transmembrane 9 superfamily member 3	19	41.2108	4.495			0.313	8.17e-05
1469	ENSMUST00000026208	liver.int.EAA	Abcc2	ATP-binding cassette, sub-family C (CFTR/MRP), member 2	19	43.7822	4.948			0.313	8.19e-05
1470	ENSMUST00000085953	liver.int.EAA	Atp5sl	ATP5S-like	7	25.6195	3.947			-0.313	8.2e-05
1471	ENSMUST00000038197	liver.int.EAA	Mrap	melanocortin 2 receptor accessory protein	16	90.7383	5.649			-0.313	8.21e-05
1472	ENSMUST00000183038	liver.int.EAA	Ccser2	coiled-coil serine rich 2	14	36.8788	2.213			0.313	8.21e-05
1473	ENSMUST00000077666	liver.int.EAA	Cnnm2	cyclin M2	19	46.7616	2.122			0.313	8.23e-05
1474	ENSMUST00000169772	liver.int.EAA	Spats2l	spermatogenesis associated, serine-rich 2-like	1	57.8456	0.496			0.313	8.23e-05
1475	ENSMUST00000014174	liver.int.EAA	Pax5	paired box 5	4	44.5248	0.254			0.313	8.24e-05
1476	ENSMUST00000039419	liver.int.EAA	Igsf10	immunoglobulin superfamily, member 10	3	59.3167	0.238			0.313	8.26e-05
1477	ENSMUST00000115313	liver.int.EAA	Klhl13	kelch-like 13	X	23.2193	1.495			0.313	8.26e-05
1478	ENSMUST00000119595	liver.int.EAA	Slc29a3	solute carrier family 29 (nucleoside transporters), member 3	10	60.714	1.11			0.313	8.27e-05
1479	ENSMUST00000174269	liver.int.EAA	Syncrip	synaptotagmin binding, cytoplasmic RNA interacting protein	9	88.4526	2.933			0.313	8.28e-05
1480	ENSMUST00000042345	liver.int.EAA	Ctnna1	catenin (cadherin associated protein), alpha 1	18	35.1189	4.704			0.313	8.3e-05
1481	ENSMUST00000108039	liver.int.EAA	Ints2	integrator complex subunit 2	11	86.2121	0.595			0.313	8.31e-05
1482	ENSMUST00000125704	liver.int.EAA	2010107G23Rik	RIKEN cDNA 2010107G23 gene	10	62.1077	1.226			0.313	8.33e-05
1483	ENSMUST00000155949	pan.EAA/liver.int.EAA	6530402F18Rik	RIKEN cDNA 6530402F18 gene	2	29.2451	0.509	0.239	0.00295	0.313	8.4e-05
1484	ENSMUST00000163799	liver.int.EAA	Stard10	START domain containing 10	7	101.317	9.595			-0.312	8.42e-05
1485	ENSMUST00000039694	liver.int.EAA	Stard3nl	STARD3 N-terminal like	13	19.3577	2.806			0.312	8.44e-05
1486	ENSMUST00000142093	liver.int.EAA	Il1rn	interleukin 1 receptor antagonist	2	24.3369	2.081			0.312	8.45e-05
1487	ENSMUST00000058902	liver.int.EAA	Eml6	echinoderm microtubule associated protein like 6	11	29.743	0.198			0.312	8.47e-05
1488	ENSMUST00000033450	liver.int.EAA	Gpc4	glypican 4	X	52.053	4.436			0.312	8.48e-05
1489	ENSMUST00000185405	liver.int.EAA	Clasp1	CLIP associating protein 1	1	118.42	1.279			0.312	8.48e-05
1490	ENSMUST00000124615	liver.int.EAA	2010107G23Rik	RIKEN cDNA 2010107G23 gene	10	62.1082	1.386			0.312	8.49e-05
1491	ENSMUST00000201912	liver.int.EAA	Rbpj	recombination signal binding protein for immunoglobulin kappa J region	5	53.5904	1.385			0.312	8.49e-05
1492	ENSMUST00000174282	liver.int.EAA	Syncrip	synaptotagmin binding, cytoplasmic RNA interacting protein	9	88.4527	2.897			0.312	8.5e-05
1493	ENSMUST00000119344	liver.int.EAA	Pfn2	profilin 2	3	57.8419	1.449			-0.312	8.52e-05
1494	ENSMUST00000030464	liver.int.EAA	Pik3r3	phosphatidylinositol 3 kinase, regulatory subunit, polypeptide 3 (p55)	4	116.222	0.335			0.312	8.52e-05
1495	ENSMUST00000102490	pan.EAA/liver.int.EAA	Epb4.2	erythrocyte protein band 4.2	2	121.018	0.033	0.305	0.000124	0.312	8.53e-05
1496	ENSMUST00000001479	liver.int.EAA	Kpnb1	karyopherin (importin) beta 1	11	97.1597	3.931			0.312	8.53e-05
1497	ENSMUST00000118663	liver.int.EAA	Akr1c19	aldo-keto reductase family 1, member C19	13	4.2287	4.306			-0.312	8.55e-05
1498	ENSMUST00000164479	liver.int.EAA	Stard10	START domain containing 10	7	101.317	9.917			-0.312	8.57e-05
1499	ENSMUST00000081326	liver.int.EAA	Akr1c19	aldo-keto reductase family 1, member C19	13	4.23374	4.418			-0.312	8.57e-05
1500	ENSMUST00000087360	liver.int.EAA	Rbpj	recombination signal binding protein for immunoglobulin kappa J region	5	53.5558	1.422			0.312	8.57e-05
1501	ENSMUST00000112253	liver.int.EAA	Vwf	Von Willebrand factor homolog	6	125.553	0.633			0.312	8.58e-05
1502	ENSMUST00000052029	liver.int.EAA	Ppip5k1	diphosphoinositol pentakisphosphate kinase 1	2	121.311	0.783			0.312	8.59e-05
1503	ENSMUST00000167459	liver.int.EAA	Mbnl2	muscleblind-like 2	14	120.276	2.974			0.312	8.59e-05
1504	ENSMUST00000058210	liver.int.EAA	Eps8	epidermal growth factor receptor pathway substrate 8	6	137.477	0.85			0.312	8.62e-05
1505	ENSMUST00000037618	liver.int.EAA	Rbpj	recombination signal binding protein for immunoglobulin kappa J region	5	53.5902	1.389			0.312	8.63e-05
1506	ENSMUST00000064050	liver.int.EAA	2010107G23Rik	RIKEN cDNA 2010107G23 gene	10	62.1082	1.637			0.312	8.64e-05
1507	ENSMUST00000029730	pan.EAA/liver.int.EAA	Chd1l	chromodomain helicase DNA binding protein 1-like	3	97.5607	2.219	0.257	0.00136	0.312	8.66e-05
1508	ENSMUST00000029669	liver.int.EAA	Dnajb4	DnaJ (Hsp40) homolog, subfamily B, member 4	3	152.185	3.289			0.312	8.66e-05
1509	ENSMUST00000103013	liver.int.EAA	Tbcd	tubulin-specific chaperone d	11	121.452	3.078			0.312	8.68e-05
1510	ENSMUST00000046897	liver.int.EAA	Trim14	tripartite motif-containing 14	4	46.5068	4.172			0.312	8.69e-05
1511	ENSMUST00000109824	pan.EAA/liver.int.EAA	Id1	inhibitor of DNA binding 1	2	152.736	3.085	-0.251	0.00173	-0.312	8.7e-05
1512	ENSMUST00000174481	pan.EAA/liver.int.EAA	Rps6ka1	ribosomal protein S6 kinase polypeptide 1	4	133.848	3.091	0.279	0.00047	0.312	8.71e-05
1513	ENSMUST00000059980	liver.int.EAA	Rpl37a	ribosomal protein L37a	1	72.7113	8.212			-0.312	8.71e-05
1514	ENSMUST00000023612	liver.int.EAA	Ets2	E26 avian leukemia oncogene 2, 3' domain	16	95.7021	2.995			0.312	8.71e-05
1515	ENSMUST00000111881	pan.EAA/liver.int.EAA	Nfkb2	nuclear factor of kappa light polypeptide gene enhancer in B cells 2, p49/p100	19	46.3057	2.398	0.29	0.000273	0.312	8.72e-05
1516	ENSMUST00000033846	pan.EAA/liver.int.EAA	Angpt2	angiopoietin 2	8	18.6903	0.333	0.267	0.000851	0.312	8.74e-05
1517	ENSMUST00000106537	liver.int.EAA	Atp5h	ATP synthase, H+ transporting, mitochondrial F0 complex, subunit D	11	115.416	7.543			-0.312	8.74e-05
1518	ENSMUST00000188204	pan.EAA/liver.int.EAA	Nabp1	nucleic acid binding protein 1	1	51.4708	2.219	0.244	0.00241	0.312	8.78e-05
1519	ENSMUST00000009789	pan.EAA/liver.int.EAA	P4ha1	procollagen-proline, 2-oxoglutarate 4-dioxygenase (proline 4-hydroxylase), alpha 1 polypeptide	10	59.3233	1.693	0.315	7.24e-05	0.312	8.79e-05
1520	ENSMUST00000047885	liver.int.EAA	Nt5dc1	5'-nucleotidase domain containing 1	10	34.3036	2.411			0.312	8.79e-05
1521	ENSMUST00000105512	liver.int.EAA	Nt5dc1	5'-nucleotidase domain containing 1	10	34.3036	2.418			0.312	8.82e-05
1522	ENSMUST00000043931	liver.int.EAA	Atp5h	ATP synthase, H+ transporting, mitochondrial F0 complex, subunit D	11	115.416	7.67			-0.312	8.83e-05
1523	ENSMUST00000051309	liver.int.EAA	Olfm3	olfactomedin 3	3	115.081	0.613			0.312	8.83e-05
1524	ENSMUST00000108624	liver.int.EAA	Rps9	ribosomal protein S9	7	3.70432	8.909			-0.312	8.84e-05
1525	ENSMUST00000088419	liver.int.EAA	Mbnl2	muscleblind-like 2	14	120.276	2.961			0.312	8.84e-05
1526	ENSMUST00000142796	liver.int.EAA	2010107G23Rik	RIKEN cDNA 2010107G23 gene	10	62.1082	1.604			0.312	8.84e-05
1527	ENSMUST00000021620	pan.EAA/liver.int.EAA	Otub2	OTU domain, ubiquitin aldehyde binding 2	12	103.389	0.853	0.259	0.00121	0.312	8.86e-05
1528	ENSMUST00000073791	liver.int.EAA	Atp5h	ATP synthase, H+ transporting, mitochondrial F0 complex, subunit D	11	115.416	7.594			-0.311	8.9e-05
1529	ENSMUST00000090511	liver.int.EAA	Gcc1	golgi coiled coil 1	6	28.4161	2.17			0.311	8.9e-05
1530	ENSMUST00000176523	liver.int.EAA	Ap2b1	adaptor-related protein complex 2, beta 1 subunit	11	83.3082	3.177			0.311	8.9e-05
1531	ENSMUST00000121837	liver.int.EAA	Dsg2	desmoglein 2	18	20.5582	3.996			0.311	8.91e-05
1532	ENSMUST00000031775	liver.int.EAA	Cald1	caldesmon 1	6	34.7096	6.09			0.311	8.91e-05
1533	ENSMUST00000034093	liver.int.EAA	Eif2ak3	eukaryotic translation initiation factor 2 alpha kinase 3	6	70.8445	1.915			0.311	8.93e-05
1534	ENSMUST00000110521	pan.EAA/liver.int.EAA	Gm14085	predicted gene 14085	2	122.485	0.08	0.317	6.36e-05	0.311	8.99e-05
1535	ENSMUST00000142821	liver.int.EAA	2010107G23Rik	RIKEN cDNA 2010107G23 gene	10	62.1082	1.512			0.311	9e-05
1536	ENSMUST00000167144	pan.EAA/liver.int.EAA	Cd180	CD180 antigen	13	102.694	0.919	0.263	0.00103	0.311	9.03e-05
1537	ENSMUST00000161509	liver.int.EAA	4930486I03Rik	RIKEN cDNA 4930486I03 gene	1	20.3565	0.071			0.311	9.03e-05
1538	ENSMUST00000174688	liver.int.EAA	Syncrip	synaptotagmin binding, cytoplasmic RNA interacting protein	9	88.4524	2.917			0.311	9.03e-05
1539	ENSMUST00000023359	liver.int.EAA	Nde1	nuclear distribution gene E homolog 1 (A nidulans)	16	14.1633	2.867			0.311	9.04e-05
1540	ENSMUST00000020361	liver.int.EAA	Ndufs7	NADH dehydrogenase (ubiquinone) Fe-S protein 7	10	80.2495	7.197			-0.311	9.05e-05
1541	ENSMUST00000181258	liver.int.EAA	Gm26811	predicted gene, 26811	6	89.3046	0.404			0.311	9.07e-05
1542	ENSMUST00000105364	liver.int.EAA	Ndufs7	NADH dehydrogenase (ubiquinone) Fe-S protein 7	10	80.2491	6.829			-0.311	9.08e-05
1543	ENSMUST00000041023	liver.int.EAA	Ipo9	importin 9	1	135.382	2.398			0.311	9.1e-05
1544	ENSMUST00000061850	liver.int.EAA	Pomk	protein-O-mannose kinase	8	25.9806	1.692			0.311	9.14e-05
1545	ENSMUST00000180920	liver.int.EAA	Gm26695	predicted gene, 26695	17	23.5568	2.104			0.311	9.15e-05
1546	ENSMUST00000162041	liver.int.EAA	Gcc2	GRIP and coiled-coil domain containing 2	10	58.2555	1.954			0.311	9.16e-05
1547	ENSMUST00000113865	liver.int.EAA	Rbpj	recombination signal binding protein for immunoglobulin kappa J region	5	53.5905	1.404			0.311	9.17e-05
1548	ENSMUST00000011492	liver.int.EAA	Acad9	acyl-Coenzyme A dehydrogenase family, member 9	3	36.066	3.719			0.311	9.19e-05
1549	ENSMUST00000090178	liver.int.EAA	Dnajb14	DnaJ (Hsp40) homolog, subfamily B, member 14	3	137.868	1.564			0.311	9.2e-05
1550	ENSMUST00000165234	liver.int.EAA	Pigu	phosphatidylinositol glycan anchor biosynthesis, class U	2	155.278	2.867			0.311	9.21e-05
1551	ENSMUST00000190080	pan.EAA/liver.int.EAA	Trerf1	transcriptional regulating factor 1	17	47.1409	0.273	0.268	0.000795	0.311	9.22e-05
1552	ENSMUST00000102870	liver.int.EAA	Xpo1	exportin 1, CRM1 homolog (yeast)	11	23.2561	2.362			0.311	9.23e-05
1553	ENSMUST00000186684	pan.EAA/liver.int.EAA	Nabp1	nucleic acid binding protein 1	1	51.4699	1.834	0.254	0.00154	0.311	9.24e-05
1554	ENSMUST00000006764	liver.int.EAA	Aprt	adenine phosphoribosyl transferase	8	122.575	5.465			-0.311	9.24e-05
1555	ENSMUST00000020985	pan.EAA/liver.int.EAA	Grhl1	grainyhead-like 1 (Drosophila)	12	24.5807	0.295	0.239	0.00296	0.311	9.31e-05
1556	ENSMUST00000053593	liver.int.EAA	Rap2c	RAP2C, member of RAS oncogene family	X	51.0039	3.107			0.311	9.32e-05
1557	ENSMUST00000120564	pan.EAA/liver.int.EAA	Igfbp2	insulin-like growth factor binding protein 2	1	72.8253	9.202	-0.276	0.000542	-0.311	9.34e-05
1558	ENSMUST00000040853	liver.int.EAA	Oxsr1	oxidative-stress responsive 1	9	119.238	2.699			0.311	9.34e-05
1559	ENSMUST00000176906	liver.int.EAA	Rpl41	ribosomal protein L41	10	128.548	8.83			-0.311	9.35e-05
1560	ENSMUST00000032927	liver.int.EAA	Stard10	START domain containing 10	7	101.321	9.905			-0.311	9.37e-05
1561	ENSMUST00000176010	liver.int.EAA	Rpl41	ribosomal protein L41	10	128.548	8.638			-0.311	9.37e-05
1562	ENSMUST00000075588	liver.int.EAA	Tnfrsf22	tumor necrosis factor receptor superfamily, member 22	7	143.635	0.309			0.31	9.38e-05
1563	ENSMUST00000112891	liver.int.EAA	Tmem164	transmembrane protein 164	X	142.681	1.039			0.31	9.4e-05
1564	ENSMUST00000176683	liver.int.EAA	Rpl41	ribosomal protein L41	10	128.548	9.05			-0.31	9.41e-05
1565	ENSMUST00000177163	liver.int.EAA	Rpl41	ribosomal protein L41	10	128.548	8.735			-0.31	9.43e-05
1566	ENSMUST00000128384	pan.EAA/liver.int.EAA	Fam187b	family with sequence similarity 187, member B	7	30.9819	0.652	0.296	0.000207	0.31	9.45e-05
1567	ENSMUST00000066298	pan.EAA/liver.int.EAA	B430305J03Rik	RIKEN cDNA B430305J03 gene	3	61.3622	0.961	0.305	0.000126	0.31	9.5e-05
1568	ENSMUST00000077626	liver.int.EAA	Pigu	phosphatidylinositol glycan anchor biosynthesis, class U	2	155.278	2.86			0.31	9.5e-05
1569	ENSMUST00000020640	liver.int.EAA	Gnb2l1	guanine nucleotide binding protein (G protein), beta polypeptide 2 like 1	11	48.8004	7.547			-0.31	9.55e-05
1570	ENSMUST00000067036	liver.int.EAA	Bsg	basigin	10	79.7045	8.063			0.31	9.57e-05
1571	ENSMUST00000155195	pan.EAA/liver.int.EAA	Synpo	synaptopodin	18	60.6002	1.342	0.249	0.00195	0.31	9.58e-05
1572	ENSMUST00000108329	liver.int.EAA	Cp	ceruloplasmin	3	19.9571	7.525			0.31	9.61e-05
1573	ENSMUST00000108328	liver.int.EAA	Cp	ceruloplasmin	3	19.9571	7.544			0.31	9.61e-05
1574	ENSMUST00000003714	liver.int.EAA	Cp	ceruloplasmin	3	19.9571	7.682			0.31	9.61e-05
1575	ENSMUST00000197480	liver.int.EAA	Smarcc1	SWI/SNF related, matrix associated, actin dependent regulator of chromatin, subfamily c, member 1	9	110.132	2.013			0.31	9.63e-05
1576	ENSMUST00000180072	liver.int.EAA	Atp5h	ATP synthase, H+ transporting, mitochondrial F0 complex, subunit D	11	115.416	8.006			-0.31	9.67e-05
1577	ENSMUST00000121725	liver.int.EAA	Gda	guanine deaminase	19	21.394	2.427			0.31	9.7e-05
1578	ENSMUST00000045004	liver.int.EAA	Dopey2	dopey family member 2	16	93.7119	2.547			0.31	9.7e-05
1579	ENSMUST00000073116	pan.EAA/liver.int.EAA	Nfkb2	nuclear factor of kappa light polypeptide gene enhancer in B cells 2, p49/p100	19	46.3047	2.491	0.287	0.000323	0.31	9.72e-05
1580	ENSMUST00000026420	liver.int.EAA	Rps26	ribosomal protein S26	10	128.625	8.236			-0.31	9.74e-05
1581	ENSMUST00000120990	liver.int.EAA	Olfml1	olfactomedin-like 1	7	107.567	3.129			0.31	9.75e-05
1582	ENSMUST00000047328	pan.EAA/liver.int.EAA	Igfbp2	insulin-like growth factor binding protein 2	1	72.8245	9.319	-0.276	0.000556	-0.31	9.76e-05
1583	ENSMUST00000170878	pan.EAA/liver.int.EAA	Cd180	CD180 antigen	13	102.694	0.654	0.246	0.00217	0.31	9.79e-05
1584	ENSMUST00000112148	liver.int.EAA	Foxm1	forkhead box M1	6	128.366	0.252			0.31	9.79e-05
1585	ENSMUST00000031554	liver.int.EAA	Tmem168	transmembrane protein 168	6	13.5807	2.213			0.31	9.8e-05
1586	ENSMUST00000049122	liver.int.EAA	Pphln1	periphilin 1	15	93.3983	1.942			0.31	9.82e-05
1587	ENSMUST00000030010	liver.int.EAA	Abca1	ATP-binding cassette, sub-family A (ABC1), member 1	4	53.0308	3.527			0.31	9.83e-05
1588	ENSMUST00000115318	pan.EAA/liver.int.EAA	Synpo	synaptopodin	18	60.6002	1.334	0.248	0.002	0.31	9.84e-05
1589	ENSMUST00000174361	liver.int.EAA	Syncrip	synaptotagmin binding, cytoplasmic RNA interacting protein	9	88.4561	3.142			0.31	9.86e-05
1590	ENSMUST00000176430	liver.int.EAA	Ap2b1	adaptor-related protein complex 2, beta 1 subunit	11	83.3027	2.833			0.31	9.87e-05
1591	ENSMUST00000108325	liver.int.EAA	Cp	ceruloplasmin	3	19.9573	8.019			0.31	9.89e-05
1592	ENSMUST00000178543	liver.int.EAA	Mapk9	mitogen-activated protein kinase 9	11	49.8468	3.221			0.309	9.91e-05
1593	ENSMUST00000107400	liver.int.EAA	Fkbp10	FK506 binding protein 10	11	100.416	0.706			0.309	9.92e-05
1594	ENSMUST00000122309	pan.EAA/liver.int.EAA	Gm13157	predicted gene 13157	4	147.754	0.478	0.252	0.00169	0.309	9.93e-05
1595	ENSMUST00000109179	liver.int.EAA	Mapk9	mitogen-activated protein kinase 9	11	49.8468	3.22			0.309	9.93e-05
1596	ENSMUST00000080127	liver.int.EAA	Homer1	homer homolog 1 (Drosophila)	13	93.3048	1.147			0.309	9.95e-05
1597	ENSMUST00000195123	liver.int.EAA	Rpl31	ribosomal protein L31	1	39.3681	8.562			-0.309	9.96e-05
1598	ENSMUST00000020372	liver.int.EAA	Uqcr11	ubiquinol-cytochrome c reductase, complex III subunit XI	10	80.403	8.247			-0.309	9.97e-05
1599	ENSMUST00000066882	liver.int.EAA	Pfn2	profilin 2; (BXD Mendelian reference 3.58, high D)	3	57.8419	1.289			-0.309	9.98e-05
1600	ENSMUST00000041208	liver.int.EAA	Aaas	achalasia, adrenocortical insufficiency, alacrimia	15	102.338	2.181			0.309	9.99e-05
1601	ENSMUST00000035077	pan.EAA/liver.int.EAA	Ltf	lactotransferrin	9	111.019	0.532	0.253	0.00157	0.309	0.0001
1602	ENSMUST00000125326	liver.int.EAA	Mdfic	MyoD family inhibitor domain containing	6	15.7207	2.152			0.309	0.0001
1603	ENSMUST00000142664	pan.EAA/liver.int.EAA	P2rx4	purinergic receptor P2X, ligand-gated ion channel 4	5	122.708	5.199	0.252	0.00167	0.309	0.000101
1604	ENSMUST00000116094	liver.int.EAA	Rnf186	ring finger protein 186	4	138.967	3.083			-0.309	0.000101
1605	ENSMUST00000045986	liver.int.EAA	Spr	sepiapterin reductase	6	85.1337	7.042			-0.309	0.000101
1606	ENSMUST00000122290	liver.int.EAA	Ndufb5	NADH dehydrogenase (ubiquinone) 1 beta subcomplex, 5	3	32.7448	6.204			-0.309	0.000101
1607	ENSMUST00000105381	liver.int.EAA	Bsg	basigin	10	79.7096	8.312			0.309	0.000101
1608	ENSMUST00000038228	liver.int.EAA	Tmx4	thioredoxin-related transmembrane protein 4	2	134.594	1.735			0.309	0.000101
1609	ENSMUST00000195442	liver.int.EAA	Rabgap1l	RAB GTPase activating protein 1-like	1	160.672	1.848			0.309	0.000101
1610	ENSMUST00000057659	liver.int.EAA	Gcc2	GRIP and coiled-coil domain containing 2	10	58.2555	1.944			0.309	0.000101
1611	ENSMUST00000019074	pan.EAA/liver.int.EAA	Ccl4	chemokine (C-C motif) ligand 4	11	83.6626	0.609	0.351	8.66e-06	0.309	0.000102
1612	ENSMUST00000074015	pan.EAA/liver.int.EAA	Negr1	neuronal growth regulator 1	3	156.562	0.033	0.326	3.99e-05	0.309	0.000102
1613	ENSMUST00000003741	pan.EAA/liver.int.EAA	Rps6ka1	ribosomal protein S6 kinase polypeptide 1	4	133.847	3.061	0.285	0.000357	0.309	0.000102
1614	ENSMUST00000110408	pan.EAA/liver.int.EAA	Ropn1l	ropporin 1-like	15	31.4412	3.439	-0.278	0.0005	-0.309	0.000102
1615	ENSMUST00000040990	liver.int.EAA	Vwa8	von Willebrand factor A domain containing 8	14	78.8492	4.956			0.309	0.000102
1616	ENSMUST00000023578	liver.int.EAA	Dgkg	diacylglycerol kinase, gamma	16	22.4692	0.056			0.309	0.000102
1617	ENSMUST00000118353	liver.int.EAA	Kif3a	kinesin family member 3A	11	53.5675	1.169			0.309	0.000102
1618	ENSMUST00000038287	liver.int.EAA	Dusp5	dual specificity phosphatase 5	19	53.5291	0.749			0.309	0.000102
1619	ENSMUST00000089017	liver.int.EAA	Fndc3a	fibronectin type III domain containing 3A	14	72.5379	3.05			0.309	0.000102
1620	ENSMUST00000139631	pan.EAA/liver.int.EAA	P2rx4	purinergic receptor P2X, ligand-gated ion channel 4	5	122.708	5.297	0.253	0.00158	0.309	0.000103
1621	ENSMUST00000089765	liver.int.EAA	Chrac1	chromatin accessibility complex 1	15	73.0904	4.021			-0.309	0.000103
1622	ENSMUST00000109262	liver.int.EAA	Zmynd8	zinc finger, MYND-type containing 8	2	165.827	2.275			0.309	0.000103
1623	ENSMUST00000152452	liver.int.EAA	Rprd1b	regulation of nuclear pre-mRNA domain containing 1B	2	158.029	2.965			0.309	0.000103
1624	ENSMUST00000162860	liver.int.EAA	Gcc2	GRIP and coiled-coil domain containing 2	10	58.2555	1.961			0.309	0.000103
1625	ENSMUST00000106490	liver.int.EAA	Pik3r3	phosphatidylinositol 3 kinase, regulatory subunit, polypeptide 3 (p55)	4	116.222	0.352			0.309	0.000103
1626	ENSMUST00000003395	pan.EAA/liver.int.EAA	Pde4a	phosphodiesterase 4A, cAMP specific	9	21.1967	0.595	0.328	3.59e-05	0.309	0.000104
1627	ENSMUST00000105894	pan.EAA/liver.int.EAA	Rps6ka1	ribosomal protein S6 kinase polypeptide 1	4	133.847	3.041	0.285	0.000359	0.309	0.000104
1628	ENSMUST00000101094	pan.EAA/liver.int.EAA	Otub2	OTU domain, ubiquitin aldehyde binding 2	12	103.389	0.764	0.257	0.00134	0.309	0.000104
1629	ENSMUST00000167085	liver.int.EAA	Spats2l	spermatogenesis associated, serine-rich 2-like	1	57.7749	0.396			0.309	0.000104
1630	ENSMUST00000065896	pan.EAA/liver.int.EAA	Kif2c	kinesin family member 2C	4	117.16	0.178	0.311	8.96e-05	0.308	0.000105
1631	ENSMUST00000113480	pan.EAA/liver.int.EAA	Cysltr1	cysteinyl leukotriene receptor 1	X	106.574	0.167	0.254	0.00153	0.308	0.000105
1632	ENSMUST00000201353	pan.EAA/liver.int.EAA	Mpv17	MpV17 mitochondrial inner membrane protein	5	31.1415	4.624	0.252	0.00164	0.308	0.000105
1633	ENSMUST00000113123	liver.int.EAA	Mapkap1	mitogen-activated protein kinase associated protein 1	2	34.4069	3.969			0.308	0.000105
1634	ENSMUST00000066921	liver.int.EAA	Slc25a40	solute carrier family 25, member 40	5	8.42285	0.97			0.308	0.000105
1635	ENSMUST00000072954	liver.int.EAA	Lancl2	LanC (bacterial lantibiotic synthetase component C)-like 2	6	57.7025	1.629			0.309	0.000105
1636	ENSMUST00000059983	liver.int.EAA	Vamp8	vesicle-associated membrane protein 8	6	72.3852	6.971			-0.308	0.000106
1637	ENSMUST00000097274	liver.int.EAA	Prkce	protein kinase C, epsilon	17	86.1682	1.901			0.308	0.000106
1638	ENSMUST00000030340	liver.int.EAA	Scp2	sterol carrier protein 2, liver	4	108.044	9.407			0.308	0.000106
1639	ENSMUST00000149692	liver.int.EAA	Dyx1c1Ccpg1	Dyx1c1-Ccpg1 readthrough transcript (NMD candidate)	9	72.9589	3.512			0.308	0.000106
1640	ENSMUST00000020634	liver.int.EAA	Mapk9	mitogen-activated protein kinase 9	11	49.8468	3.228			0.308	0.000106
1641	ENSMUST00000164643	liver.int.EAA	Mapk9	mitogen-activated protein kinase 9	11	49.8468	3.227			0.308	0.000106
1642	ENSMUST00000113991	liver.int.EAA	Dmd	dystrophin, muscular dystrophy	X	85.0484	2.209			0.308	0.000106
1643	ENSMUST00000110189	pan.EAA/liver.int.EAA	Smox	spermine oxidase	2	131.492	1.71	0.27	0.000732	0.308	0.000107
1644	ENSMUST00000201883	liver.int.EAA	Rbpj	recombination signal binding protein for immunoglobulin kappa J region	5	53.591	1.17			0.308	0.000107
1645	ENSMUST00000124795	liver.int.EAA	AV039307	expressed sequence AV039307	2	120.851	0.675			0.308	0.000107
1646	ENSMUST00000029347	liver.int.EAA	Ift80	intraflagellar transport 80	3	68.8925	0.724			0.308	0.000107
1647	ENSMUST00000034965	liver.int.EAA	Snapc5	small nuclear RNA activating complex, polypeptide 5	9	64.1793	3.768			0.308	0.000107
1648	ENSMUST00000114606	liver.int.EAA	Etl4	enhancer trap locus 4	2	20.7373	0.979			0.308	0.000108
1649	ENSMUST00000053902	liver.int.EAA	Elmod2	ELMO/CED-12 domain containing 2	8	83.313	1.881			0.308	0.000108
1650	ENSMUST00000047232	liver.int.EAA	Agps	alkylglycerone phosphate synthase	2	75.8322	1.354			0.308	0.000108
1651	ENSMUST00000098817	liver.int.EAA	Vps37a	vacuolar protein sorting 37A (yeast)	8	40.5118	2.342			0.308	0.000108
1652	ENSMUST00000109024	liver.int.EAA	Lima1	LIM domain and actin binding 1	15	99.7785	3.958			0.308	0.000108
1653	ENSMUST00000073691	liver.int.EAA	Lima1	LIM domain and actin binding 1	15	99.7785	3.954			0.308	0.000108
1654	ENSMUST00000097590	liver.int.EAA	Lars	leucyl-tRNA synthetase	18	42.2023	2.941			0.308	0.000108
1655	ENSMUST00000123399	liver.int.EAA	Uhmk1	U2AF homology motif (UHM) kinase 1	1	170.193	2.8			0.308	0.000108
1656	ENSMUST00000045224	liver.int.EAA	Acer2	alkaline ceramidase 2	4	86.8744	1.809			0.308	0.000108
1657	ENSMUST00000105712	liver.int.EAA	Plod1	procollagen-lysine, 2-oxoglutarate 5-dioxygenase 1	4	147.928	3.763			0.308	0.000108
1658	ENSMUST00000050077	liver.int.EAA	Lancl2	LanC (bacterial lantibiotic synthetase component C)-like 2	6	57.7026	1.664			0.308	0.000108
1659	ENSMUST00000120717	liver.int.EAA	Capn11	calpain 11	17	45.6302	0.664			-0.308	0.000109
1660	ENSMUST00000037977	liver.int.EAA	Ccpg1	cell cycle progression 1	9	72.9854	3.848			0.308	0.000109
1661	ENSMUST00000179781	liver.int.EAA	Bsg	basigin	10	79.7045	8.329			0.308	0.000109
1662	ENSMUST00000138166	liver.int.EAA	Bbx	bobby sox homolog (Drosophila)	16	50.1918	1.037			0.308	0.000109
1663	ENSMUST00000027657	liver.int.EAA	C4bp	complement component 4 binding protein	1	130.635	6.89			0.308	0.000109
1664	ENSMUST00000027979	liver.int.EAA	Uhmk1	U2AF homology motif (UHM) kinase 1	1	170.193	2.787			0.308	0.000109
1665	ENSMUST00000014499	liver.int.EAA	Anapc1	anaphase promoting complex subunit 1	2	128.61	2.159			0.308	0.000109
1666	ENSMUST00000100335	pan.EAA/liver.int.EAA	Mrc2	mannose receptor, C type 2	11	105.293	0.578	0.257	0.00132	0.308	0.00011
1667	ENSMUST00000046288	liver.int.EAA	Ndufv3	NADH dehydrogenase (ubiquinone) flavoprotein 3	17	31.5202	5.476			-0.308	0.00011
1668	ENSMUST00000035635	liver.int.EAA	Bmp2k	BMP2 inducible kinase	5	96.9977	1.415			0.308	0.00011
1669	ENSMUST00000053364	liver.int.EAA	Aspm	asp (abnormal spindle)-like, microcephaly associated (Drosophila)	1	139.455	0.065			0.308	0.00011
1670	ENSMUST00000107635	liver.int.EAA	Lrba	LPS-responsive beige-like anchor	3	86.2247	1.642			0.308	0.00011
1671	ENSMUST00000103025	liver.int.EAA	Tmc6	transmembrane channel-like gene family 6	11	117.775	2.418			0.308	0.00011
1672	ENSMUST00000110824	liver.int.EAA	Atxn7l1	ataxin 7-like 1	12	33.1477	1.261			0.308	0.00011
1673	ENSMUST00000079724	liver.int.EAA	Hax1	HCLS1 associated X-1	3	89.9954	5.276			-0.307	0.000111
1674	ENSMUST00000080934	liver.int.EAA	Epha7	Eph receptor A7	4	28.8131	0.258			0.307	0.000111
1675	ENSMUST00000146409	liver.int.EAA	Slc26a2	solute carrier family 26 (sulfate transporter), member 2	18	61.1929	0.831			0.307	0.000111
1676	ENSMUST00000114806	liver.int.EAA	Fbxo40	F-box protein 40	16	36.9661	0.418			0.307	0.000111
1677	ENSMUST00000177594	liver.int.EAA	Elmod2	ELMO/CED-12 domain containing 2	8	83.3126	1.795			0.307	0.000111
1678	ENSMUST00000085350	liver.int.EAA	Ccpg1	cell cycle progression 1	9	72.9856	4.019			0.307	0.000111
1679	ENSMUST00000180595	liver.int.EAA	Gm16755	predicted gene, 16755	11	120.486	5.35			-0.307	0.000112
1680	ENSMUST00000000544	liver.int.EAA	Acvr1b	activin A receptor, type 1B	15	101.174	2.042			0.307	0.000112
1681	ENSMUST00000173801	liver.int.EAA	Syncrip	synaptotagmin binding, cytoplasmic RNA interacting protein	9	88.4556	2.666			0.307	0.000112
1682	ENSMUST00000190311	liver.int.EAA	Gm29233	predicted gene 29233	2	118.123	0.457			0.307	0.000112
1683	ENSMUST00000029727	liver.int.EAA	Fbxw7	F-box and WD-40 domain protein 7	3	84.9521	1.267			0.307	0.000112
1684	ENSMUST00000035973	liver.int.EAA	Klhl13	kelch-like 13	X	23.2193	1.54			0.307	0.000112
1685	ENSMUST00000110186	pan.EAA/liver.int.EAA	Smox	spermine oxidase	2	131.492	1.647	0.27	0.000754	0.307	0.000113
1686	ENSMUST00000072329	liver.int.EAA	Dtnbp1	dystrobrevin binding protein 1	13	44.9221	5.012			-0.307	0.000113
1687	ENSMUST00000110626	liver.int.EAA	Ppip5k1	diphosphoinositol pentakisphosphate kinase 1	2	121.311	0.817			0.307	0.000113
1688	ENSMUST00000110625	liver.int.EAA	Ppip5k1	diphosphoinositol pentakisphosphate kinase 1	2	121.311	0.814			0.307	0.000113
1689	ENSMUST00000118228	liver.int.EAA	Trib1	tribbles 1	15	59.6487	3.011			0.307	0.000113
1690	ENSMUST00000086040	liver.int.EAA	F5	coagulation factor V	1	164.152	5.687			0.307	0.000113
1691	ENSMUST00000062893	pan.EAA/liver.int.EAA	Cenpe	centromere protein E	3	135.213	0.086	0.25	0.0018	0.307	0.000114
1692	ENSMUST00000197767	liver.int.EAA	Hax1	HCLS1 associated X-1	3	89.9955	5.335			-0.307	0.000114
1693	ENSMUST00000110128	liver.int.EAA	Dtnbp1	dystrobrevin binding protein 1	13	44.9221	5.017			-0.307	0.000114
1694	ENSMUST00000109748	liver.int.EAA	Txn2	thioredoxin 2	15	77.9152	6.119			-0.307	0.000114
1695	ENSMUST00000102762	liver.int.EAA	Acot11	acyl-CoA thioesterase 11	4	106.745	1.053			0.307	0.000114
1696	ENSMUST00000028880	liver.int.EAA	Slc20a1	solute carrier family 20, member 1	2	129.199	3.141			0.307	0.000114
1697	ENSMUST00000115020	liver.int.EAA	Ocrl	oculocerebrorenal syndrome of Lowe	X	47.9124	0.698			0.307	0.000114
1698	ENSMUST00000114340	liver.int.EAA	Add1	adducin 1 (alpha)	5	34.5739	3.76			0.307	0.000114
1699	ENSMUST00000115795	liver.int.EAA	Nde1	nuclear distribution gene E homolog 1 (A nidulans)	16	14.1633	2.848			0.307	0.000114
1700	ENSMUST00000066509	liver.int.EAA	Etl4	enhancer trap locus 4	2	20.5198	0.98			0.307	0.000114
1701	ENSMUST00000153115	liver.int.EAA	D1Ertd622e	DNA segment, Chr 1, ERATO Doi 622, expressed	1	97.6439	2.138			0.307	0.000114
1702	ENSMUST00000186648	liver.int.EAA	Trip12	thyroid hormone receptor interactor 12	1	84.7243	3.662			0.307	0.000115
1703	ENSMUST00000025835	liver.int.EAA	Cpt1a	carnitine palmitoyltransferase 1a, liver	19	3.3233	6.611			0.307	0.000115
1704	ENSMUST00000002655	liver.int.EAA	Mien1	migration and invasion enhancer 1	11	98.4377	5.671			-0.307	0.000116
1705	ENSMUST00000110486	liver.int.EAA	Pds5b	PDS5, regulator of cohesion maintenance, homolog B (S. cerevisiae)	5	150.756	1.179			0.307	0.000116
1706	ENSMUST00000038753	pan.EAA/liver.int.EAA	Sh3pxd2b	SH3 and PX domains 2B	11	32.3478	0.471	0.287	0.000326	0.306	0.000117
1707	ENSMUST00000029270	pan.EAA/liver.int.EAA	Ccna2	cyclin A2	3	36.5649	0.921	0.286	0.000335	0.307	0.000117
1708	ENSMUST00000167962	liver.int.EAA	Rab12	RAB12, member RAS oncogene family	17	66.4945	3.76			0.306	0.000117
1709	ENSMUST00000114516	liver.int.EAA	Dzip3	DAZ interacting protein 3, zinc finger	16	48.9259	0.248			0.306	0.000117
1710	ENSMUST00000037941	liver.int.EAA	Cd81	CD81 antigen	7	143.053	7.453			0.307	0.000117
1711	ENSMUST00000068962	liver.int.EAA	Rbms3	RNA binding motif, single stranded interacting protein	9	116.577	0.413			0.306	0.000118
1712	ENSMUST00000061771	liver.int.EAA	Fktn	fukutin	4	53.72	1.156			0.306	0.000118
1713	ENSMUST00000029964	liver.int.EAA	Epha7	Eph receptor A7	4	28.8131	0.289			0.306	0.000118
1714	ENSMUST00000107812	liver.int.EAA	Ift80	intraflagellar transport 80	3	68.8925	0.701			0.306	0.000118
1715	ENSMUST00000106760	liver.int.EAA	Cyb5rl	cytochrome b5 reductase-like	4	107.067	2.043			0.306	0.000118
1716	ENSMUST00000070538	liver.int.EAA	Rab12	RAB12, member RAS oncogene family	17	66.4945	3.73			0.306	0.000118
1717	ENSMUST00000099542	pan.EAA/liver.int.EAA	Casc5	cancer susceptibility candidate 5	2	119.047	0.046	0.307	0.000116	0.306	0.000119
1718	ENSMUST00000154452	liver.int.EAA	Gm12352	predicted gene 12352	11	98.438	5.163			-0.306	0.000119
1719	ENSMUST00000166388	liver.int.EAA	Psd4	pleckstrin and Sec7 domain containing 4	2	24.3866	1.441			0.306	0.000119
1720	ENSMUST00000015157	liver.int.EAA	Trappc2l	trafficking protein particle complex 2-like	8	122.612	4.275			-0.306	0.00012
1721	ENSMUST00000090840	liver.int.EAA	Zrsr2	zinc finger (CCCH type), RNA binding motif and serine/arginine rich 2	X	163.95	1.491			0.306	0.00012
1722	ENSMUST00000035033	liver.int.EAA	Copb2	coatomer protein complex, subunit beta 2 (beta prime)	9	98.5637	4.966			0.306	0.00012
1723	ENSMUST00000023851	liver.int.EAA	Ndufa5	NADH dehydrogenase (ubiquinone) 1 alpha subcomplex, 5	6	24.5187	5.856			-0.306	0.000121
1724	ENSMUST00000032457	liver.int.EAA	Atg7	autophagy related 7	6	114.643	3.765			0.306	0.000121
1725	ENSMUST00000031866	liver.int.EAA	Mtpn	myotrophin	6	35.5089	4.506			0.306	0.000121
1726	ENSMUST00000061632	liver.int.EAA	Trhde	TRH-degrading enzyme	10	114.399	0.23			0.306	0.000121
1727	ENSMUST00000099972	liver.int.EAA	Itga4	integrin alpha 4	2	79.2555	0.934			0.306	0.000121
1728	ENSMUST00000192413	liver.int.EAA	Gm4430	predicted gene 4430	2	129.197	1.304			0.306	0.000121
1729	ENSMUST00000115319	liver.int.EAA	Klhl13	kelch-like 13	X	23.2193	1.42			0.306	0.000121
1730	ENSMUST00000169310	liver.int.EAA	Atg7	autophagy related 7	6	114.643	3.717			0.306	0.000121
1731	ENSMUST00000108430	liver.int.EAA	Rps19	ribosomal protein S19	7	24.8844	7.498			-0.306	0.000122
1732	ENSMUST00000105369	liver.int.EAA	Cbarp	calcium channel, voltage-dependent, beta subunit associated regulatory protein	10	80.1305	0.82			0.306	0.000122
1733	ENSMUST00000134690	liver.int.EAA	Gm7628	predicted gene 7628	9	109.094	0.848			0.306	0.000122
1734	ENSMUST00000077456	liver.int.EAA	Atxn7l1	ataxin 7-like 1	12	33.1477	1.274			0.306	0.000122
1735	ENSMUST00000150821	liver.int.EAA	Uhmk1	U2AF homology motif (UHM) kinase 1	1	170.193	2.747			0.306	0.000122
1736	ENSMUST00000140675	liver.int.EAA	Ccpg1	cell cycle progression 1	9	72.9856	3.996			0.306	0.000122
1737	ENSMUST00000058133	liver.int.EAA	Eif4g3	eukaryotic translation initiation factor 4 gamma, 3	4	137.993	2.326			0.306	0.000122
1738	ENSMUST00000069345	liver.int.EAA	Itgb5	integrin beta 5	16	33.8297	5.191			0.306	0.000122
1739	ENSMUST00000110073	pan.EAA/liver.int.EAA	9030617O03Rik	RIKEN cDNA 9030617O03 gene	12	100.779	3.297	0.324	4.27e-05	0.305	0.000123
1740	ENSMUST00000181467	pan.EAA/liver.int.EAA	Apol11b	apolipoprotein L 11b	15	77.6339	0.275	0.297	0.000191	0.306	0.000123
1741	ENSMUST00000064989	pan.EAA/liver.int.EAA	Prkcb	protein kinase C, beta	7	122.289	0.795	0.263	0.00104	0.305	0.000123
1742	ENSMUST00000163118	liver.int.EAA	Itih1	inter-alpha trypsin inhibitor, heavy chain 1	14	30.9292	7.956			0.305	0.000123
1743	ENSMUST00000006704	liver.int.EAA	Itih1	inter-alpha trypsin inhibitor, heavy chain 1	14	30.9292	7.956			0.305	0.000123
1744	ENSMUST00000029353	liver.int.EAA	Kpna4	karyopherin (importin) alpha 4	3	69.0671	2.082			0.305	0.000123
1745	ENSMUST00000102778	liver.int.EAA	Mapk9	mitogen-activated protein kinase 9	11	49.8542	3.23			0.305	0.000123
1746	ENSMUST00000109794	liver.int.EAA	Pofut1	protein O-fucosyltransferase 1	2	153.242	2.229			0.306	0.000123
1747	ENSMUST00000114627	liver.int.EAA	Etl4	enhancer trap locus 4	2	20.2899	0.956			0.306	0.000123
1748	ENSMUST00000001108	liver.int.EAA	Add1	adducin 1 (alpha)	5	34.5739	3.72			0.305	0.000124
1749	ENSMUST00000040790	liver.int.EAA	Slx4	SLX4 structure-specific endonuclease subunit homolog (S. cerevisiae)	16	3.97912	0.653			0.305	0.000124
1750	ENSMUST00000169064	liver.int.EAA	Ift80	intraflagellar transport 80	3	68.8925	0.701			0.305	0.000124
1751	ENSMUST00000160929	pan.EAA/liver.int.EAA	Hsd11b1	hydroxysteroid 11-beta dehydrogenase 1	1	193.222	8.705	-0.361	4.53e-06	-0.305	0.000125
1752	ENSMUST00000110069	pan.EAA/liver.int.EAA	9030617O03Rik	RIKEN cDNA 9030617O03 gene	12	100.779	3.348	0.324	4.37e-05	0.305	0.000125
1753	ENSMUST00000166623	pan.EAA/liver.int.EAA	Apol11b	apolipoprotein L 11b	15	77.6339	0.265	0.295	0.000213	0.305	0.000125
1754	ENSMUST00000143107	liver.int.EAA	Rpl27a	ribosomal protein L27A	7	109.519	7.099			-0.305	0.000125
1755	ENSMUST00000044642	liver.int.EAA	Micall2	MICAL-like 2	5	139.707	0.91			0.305	0.000125
1756	ENSMUST00000125544	liver.int.EAA	Gm20431	predicted gene 20431	2	167.608	4.78			0.305	0.000125
1757	ENSMUST00000107030	liver.int.EAA	Inadl	InaD-like (Drosophila)	4	98.3959	1.065			0.305	0.000125
1758	ENSMUST00000115028	liver.int.EAA	Itgb5	integrin beta 5	16	33.8297	5.177			0.305	0.000125
1759	ENSMUST00000115317	liver.int.EAA	Klhl13	kelch-like 13	X	23.2193	1.456			0.305	0.000125
1760	ENSMUST00000152703	liver.int.EAA	Tnfrsf23	tumor necrosis factor receptor superfamily, member 23	7	143.668	0.331			0.305	0.000125
1761	ENSMUST00000108428	liver.int.EAA	Rps19	ribosomal protein S19	7	24.8846	6.775			-0.305	0.000126
1762	ENSMUST00000065118	liver.int.EAA	Ube2ql1	ubiquitin-conjugating enzyme E2Q family-like 1	13	69.7028	0.547			-0.305	0.000126
1763	ENSMUST00000113200	liver.int.EAA	Lrsam1	leucine rich repeat and sterile alpha motif containing 1	2	32.9252	2.1			0.305	0.000126
1764	ENSMUST00000034980	liver.int.EAA	Atr	ataxia telangiectasia and Rad3 related	9	95.8576	0.919			0.305	0.000126
1765	ENSMUST00000191445	liver.int.EAA	Clasp1	CLIP associating protein 1	1	118.389	1.281			0.305	0.000126
1766	ENSMUST00000020251	liver.int.EAA	Gnptab	N-acetylglucosamine-1-phosphate transferase, alpha and beta subunits (mucolipidosis)	10	88.3792	1.53			0.305	0.000126
1767	ENSMUST00000067033	liver.int.EAA	Stk3	serine/threonine kinase 3	15	34.8757	1.529			0.305	0.000126
1768	ENSMUST00000045593	liver.int.EAA	Daglb	diacylglycerol lipase, beta	5	143.465	3.333			0.305	0.000126
1769	ENSMUST00000156965	liver.int.EAA	Gm15598	predicted gene 15598	17	27.988	1.276			0.305	0.000126
1770	ENSMUST00000069782	pan.EAA/liver.int.EAA	9030617O03Rik	RIKEN cDNA 9030617O03 gene	12	100.779	3.256	0.324	4.5e-05	0.305	0.000127
1771	ENSMUST00000168974	pan.EAA/liver.int.EAA	Rps6ka1	ribosomal protein S6 kinase polypeptide 1	4	133.847	3.048	0.288	0.000305	0.305	0.000127
1772	ENSMUST00000110188	pan.EAA/liver.int.EAA	Smox	spermine oxidase	2	131.492	1.717	0.267	0.000843	0.305	0.000127
1773	ENSMUST00000016670	pan.EAA/liver.int.EAA	Dyrk3	dual-specificity tyrosine-(Y)-phosphorylation regulated kinase 3	1	131.127	0.683	0.253	0.00158	0.305	0.000127
1774	ENSMUST00000117814	liver.int.EAA	Capn10	calpain 10	1	92.9348	3.678			-0.305	0.000127
1775	ENSMUST00000112889	liver.int.EAA	Tmem164	transmembrane protein 164	X	142.681	1.036			0.305	0.000127
1776	ENSMUST00000115316	liver.int.EAA	Klhl13	kelch-like 13	X	23.2193	1.5			0.305	0.000127
1777	ENSMUST00000086555	liver.int.EAA	Dhx57	DEAH (Asp-Glu-Ala-Asp/His) box polypeptide 57	17	80.2383	1.513			0.305	0.000127
1778	ENSMUST00000089015	pan.EAA/liver.int.EAA	Mas1	MAS1 oncogene	17	12.8411	0.08	0.335	2.26e-05	0.305	0.000128
1779	ENSMUST00000114614	liver.int.EAA	Etl4	enhancer trap locus 4	2	20.51	0.928			0.305	0.000128
1780	ENSMUST00000053926	liver.int.EAA	Pick1	protein interacting with C kinase 1	15	79.2294	2.214			0.305	0.000128
1781	ENSMUST00000115458	pan.EAA/liver.int.EAA	Pde4a	phosphodiesterase 4A, cAMP specific	9	21.1841	0.719	0.301	0.000154	0.305	0.000129
1782	ENSMUST00000078748	liver.int.EAA	Slc10a5	solute carrier family 10 (sodium/bile acid cotransporter family), member 5	3	10.3317	2.677			0.305	0.000129
1783	ENSMUST00000028132	liver.int.EAA	Lrsam1	leucine rich repeat and sterile alpha motif containing 1	2	32.9252	2.113			0.305	0.000129
1784	ENSMUST00000022371	liver.int.EAA	Ap3m1	adaptor-related protein complex 3, mu 1 subunit	14	21.036	4.174			0.305	0.000129
1785	ENSMUST00000028977	liver.int.EAA	Kif3b	kinesin family member 3B	2	153.291	1.772			0.305	0.000129
1786	ENSMUST00000200864	pan.EAA/liver.int.EAA	Mpv17	MpV17 mitochondrial inner membrane protein	5	31.1415	4.535	0.25	0.0018	0.304	0.00013
1787	ENSMUST00000027817	pan.EAA/liver.int.EAA	Spta1	spectrin alpha 1 (erythrocyte, bone, and bone marrow)	1	174.173	0.042	0.241	0.00267	0.304	0.00013
1788	ENSMUST00000100168	liver.int.EAA	Tarbp2	TAR (HIV) RNA binding protein 2	15	102.518	3.492			-0.305	0.00013
1789	ENSMUST00000114338	liver.int.EAA	Add1	adducin 1 (alpha)	5	34.5737	3.699			0.304	0.00013
1790	ENSMUST00000027719	liver.int.EAA	2010107G23Rik	RIKEN cDNA 2010107G23 gene	10	62.1088	1.249			0.304	0.00013
1791	ENSMUST00000044359	liver.int.EAA	Ankrd44	ankyrin repeat domain 44	1	54.6453	0.751			0.304	0.00013
1792	ENSMUST00000103188	liver.int.EAA	1700037H04Rik	RIKEN cDNA 1700037H04 gene	2	131.146	2.819			0.305	0.00013
1793	ENSMUST00000056512	liver.int.EAA	Wdr41	WD repeat domain 41	13	94.9763	2.468			0.305	0.00013
1794	ENSMUST00000020643	liver.int.EAA	Rufy1	RUN and FYVE domain containing 1	11	50.3893	3.042			0.305	0.00013
1795	ENSMUST00000027592	liver.int.EAA	Ubxn4	UBX domain protein 4	1	128.244	4.167			0.305	0.00013
1796	ENSMUST00000032183	pan.EAA/liver.int.EAA	Tmem43	transmembrane protein 43	6	91.4737	2.412	0.267	0.000849	0.304	0.000131
1797	ENSMUST00000042334	liver.int.EAA	Rpl10a	ribosomal protein L10A	17	28.3285	7.482			-0.304	0.000131
1798	ENSMUST00000188710	liver.int.EAA	Clasp1	CLIP associating protein 1	1	118.42	1.128			0.304	0.000131
1799	ENSMUST00000045555	liver.int.EAA	Etl4	enhancer trap locus 4	2	20.51	0.925			0.304	0.000131
1800	ENSMUST00000108191	liver.int.EAA	Epha7	Eph receptor A7	4	28.8132	0.293			0.304	0.000131
1801	ENSMUST00000160801	liver.int.EAA	Wdr41	WD repeat domain 41	13	94.9763	2.468			0.304	0.000131
1802	ENSMUST00000179030	liver.int.EAA	Ankrd44	ankyrin repeat domain 44	1	54.6453	0.756			0.304	0.000131
1803	ENSMUST00000047524	liver.int.EAA	Thada	thyroid adenoma associated	17	84.1901	0.786			0.304	0.000131
1804	ENSMUST00000106436	pan.EAA/liver.int.EAA	Kif2c	kinesin family member 2C	4	117.16	0.182	0.297	0.000197	0.304	0.000132
1805	ENSMUST00000168841	pan.EAA/liver.int.EAA	Ccr2	chemokine (C-C motif) receptor 2	9	124.102	0.509	0.265	0.000953	0.304	0.000132
1806	ENSMUST00000077642	pan.EAA/liver.int.EAA	Kifap3	kinesin-associated protein 3	1	163.78	1.102	0.26	0.00115	0.304	0.000132
1807	ENSMUST00000042235	liver.int.EAA	Eef1a1	eukaryotic translation elongation factor 1 alpha 1	9	78.4784	11.159			-0.304	0.000133
1808	ENSMUST00000102501	liver.int.EAA	Vps39	vacuolar protein sorting 39 (yeast)	2	120.316	2.176			0.304	0.000133
1809	ENSMUST00000114335	liver.int.EAA	Add1	adducin 1 (alpha)	5	34.574	3.488			0.304	0.000133
1810	ENSMUST00000028752	liver.int.EAA	Vps39	vacuolar protein sorting 39 (yeast)	2	120.316	2.187			0.304	0.000133
1811	ENSMUST00000027877	pan.EAA/liver.int.EAA	Kifap3	kinesin-associated protein 3	1	163.78	1.115	0.26	0.00119	0.304	0.000134
1812	ENSMUST00000170953	liver.int.EAA	Rps13	ribosomal protein S13	7	116.332	7.464			-0.304	0.000134
1813	ENSMUST00000111976	liver.int.EAA	Cfh	complement component factor h	1	140.086	7.158			0.304	0.000134
1814	ENSMUST00000066859	liver.int.EAA	Cfh	complement component factor h	1	140.086	7.159			0.304	0.000134
1815	ENSMUST00000107396	liver.int.EAA	Atp8b2	ATPase, class I, type 8B, member 2	3	89.9395	0.627			0.304	0.000134
1816	ENSMUST00000006444	liver.int.EAA	Tep1	telomerase associated protein 1	14	50.8241	1.576			0.304	0.000134
1817	ENSMUST00000034775	liver.int.EAA	Fem1b	feminization 1 homolog b (C. elegans)	9	62.7918	1.654			0.304	0.000134
1818	ENSMUST00000100941	liver.int.EAA	Vwf	Von Willebrand factor homolog	6	125.547	0.622			0.304	0.000134
1819	ENSMUST00000180949	pan.EAA/liver.int.EAA	Apol11b	apolipoprotein L 11b	15	77.634	0.247	0.293	0.000237	0.304	0.000135
1820	ENSMUST00000045682	pan.EAA/liver.int.EAA	Gramd1b	GRAM domain containing 1B	9	40.2979	0.509	0.258	0.00128	0.304	0.000135
1821	ENSMUST00000014438	liver.int.EAA	Ndufa2	NADH dehydrogenase (ubiquinone) 1 alpha subcomplex, 2	18	36.7423	6.744			-0.304	0.000135
1822	ENSMUST00000025083	liver.int.EAA	Kif5b	kinesin family member 5B	18	6.201	3.011			0.304	0.000135
1823	ENSMUST00000111828	liver.int.EAA	Ddhd1	DDHD domain containing 1	14	45.5954	1.927			0.304	0.000135
1824	ENSMUST00000075528	liver.int.EAA	Brsk2	BR serine/threonine kinase 2	7	141.95	0.067			0.304	0.000135
1825	ENSMUST00000111820	liver.int.EAA	Tmppe	transmembrane protein with metallophosphoesterase domain	9	114.401	1.143			0.304	0.000135
1826	ENSMUST00000114000	liver.int.EAA	Dmd	dystrophin, muscular dystrophy	X	82.9489	1.06			0.304	0.000135
1827	ENSMUST00000042561	pan.EAA/liver.int.EAA	Slc43a2	solute carrier family 43, member 2	11	75.5317	1.695	0.257	0.00136	0.304	0.000136
1828	ENSMUST00000073575	liver.int.EAA	Slc39a13	solute carrier family 39 (metal ion transporter), member 13	2	91.0618	2.389			0.304	0.000136
1829	ENSMUST00000024599	liver.int.EAA	Igf2r	insulin-like growth factor 2 receptor	17	12.6824	2.479			0.304	0.000136
1830	ENSMUST00000169020	liver.int.EAA	Glg1	golgi apparatus protein 1	8	111.154	3.012			0.304	0.000136
1831	ENSMUST00000111771	liver.int.EAA	Abcc9	ATP-binding cassette, sub-family C (CFTR/MRP), member 9	6	142.588	2.197			0.304	0.000136
1832	ENSMUST00000079976	liver.int.EAA	Slc39a13	solute carrier family 39 (metal ion transporter), member 13	2	91.0618	2.515			0.304	0.000136
1833	ENSMUST00000162618	liver.int.EAA	Apaf1	apoptotic peptidase activating factor 1	10	90.9906	0.556			0.304	0.000136
1834	ENSMUST00000161069	liver.int.EAA	Hr	hairless	14	70.5537	0.293			0.304	0.000136
1835	ENSMUST00000129423	liver.int.EAA	Ttyh1	tweety homolog 1 (Drosophila)	7	4.11953	0.235			0.304	0.000136
1836	ENSMUST00000030290	liver.int.EAA	Inadl	InaD-like (Drosophila)	4	98.547	1.414			0.304	0.000136
1837	ENSMUST00000110315	liver.int.EAA	Slc20a1	solute carrier family 20, member 1	2	129.199	3.103			0.304	0.000136
1838	ENSMUST00000143219	pan.EAA/liver.int.EAA	Pitpna	phosphatidylinositol transfer protein, alpha	11	75.5881	4.09	0.326	3.82e-05	0.304	0.000137
1839	ENSMUST00000179521	pan.EAA/liver.int.EAA	Pitpna	phosphatidylinositol transfer protein, alpha	11	75.5881	4.101	0.326	3.83e-05	0.303	0.000137
1840	ENSMUST00000202241	pan.EAA/liver.int.EAA	Mpv17	MpV17 mitochondrial inner membrane protein	5	31.1415	4.599	0.252	0.00169	0.304	0.000137
1841	ENSMUST00000063719	liver.int.EAA	Tmem9	transmembrane protein 9	1	136.018	3.746			-0.304	0.000137
1842	ENSMUST00000076281	liver.int.EAA	Zfp781	zinc finger protein 781	10	81.9051	0.131			0.304	0.000137
1843	ENSMUST00000111977	liver.int.EAA	Cfh	complement component factor h	1	140.086	7.232			0.304	0.000137
1844	ENSMUST00000155466	pan.EAA/liver.int.EAA	Gm20696	predicted gene 20696	6	99.2575	1.137	0.281	0.000437	0.303	0.000138
1845	ENSMUST00000119304	pan.EAA/liver.int.EAA	Jtb	jumping translocation breakpoint	3	90.2316	5.359	-0.271	0.000709	-0.303	0.000138
1846	ENSMUST00000170496	liver.int.EAA	Slc25a40	solute carrier family 25, member 40	5	8.4229	1.011			0.303	0.000138
1847	ENSMUST00000108240	liver.int.EAA	Ccnc	cyclin C	4	21.7278	2.035			0.303	0.000138
1848	ENSMUST00000034625	liver.int.EAA	Chek1	checkpoint kinase 1	9	36.7085	0.111			0.303	0.000138
1849	ENSMUST00000180430	pan.EAA/liver.int.EAA	Ksr2	kinase suppressor of ras 2	5	117.414	0.088	0.358	5.51e-06	0.303	0.000139
1850	ENSMUST00000005647	liver.int.EAA	Ndufs3	NADH dehydrogenase (ubiquinone) Fe-S protein 3	2	90.8946	6.48			-0.303	0.000139
1851	ENSMUST00000136783	liver.int.EAA	Gm28045	predicted gene, 28045	2	131.91	1.38			0.303	0.000139
1852	ENSMUST00000100827	liver.int.EAA	Abcc9	ATP-binding cassette, sub-family C (CFTR/MRP), member 9	6	142.588	2.226			0.303	0.000139
1853	ENSMUST00000127450	liver.int.EAA	Rptoros	regulatory associated protein of MTOR, complex 1, opposite strand	11	119.821	0.801			0.303	0.000139
1854	ENSMUST00000169547	pan.EAA/liver.int.EAA	Slc43a2	solute carrier family 43, member 2	11	75.5321	1.677	0.253	0.00158	0.303	0.00014
1855	ENSMUST00000020522	pan.EAA/liver.int.EAA	Pfkl	phosphofructokinase, liver, B-type	10	77.9869	4.238	0.238	0.00299	0.303	0.00014
1856	ENSMUST00000118964	liver.int.EAA	Mtx1	metaxin 1	3	89.2091	4.491			-0.303	0.00014
1857	ENSMUST00000038161	liver.int.EAA	Agmat	agmatine ureohydrolase (agmatinase)	4	141.747	7.214			-0.303	0.00014
1858	ENSMUST00000114823	liver.int.EAA	Mkrn1	makorin, ring finger protein, 1	6	39.3978	3.47			0.303	0.00014
1859	ENSMUST00000073173	liver.int.EAA	Abcc9	ATP-binding cassette, sub-family C (CFTR/MRP), member 9	6	142.588	2.206			0.303	0.00014
1860	ENSMUST00000037709	liver.int.EAA	Tm7sf3	transmembrane 7 superfamily member 3	6	146.602	4.288			0.303	0.00014
1861	ENSMUST00000119756	liver.int.EAA	Tbc1d1	TBC1 domain family, member 1	5	64.2304	1.182			0.303	0.00014
1862	ENSMUST00000065079	pan.EAA/liver.int.EAA	Mmp12	matrix metallopeptidase 12	9	7.34737	0.742	0.341	1.62e-05	0.303	0.000141
1863	ENSMUST00000205002	liver.int.EAA	Ndufa9	NADH dehydrogenase (ubiquinone) 1 alpha subcomplex, 9	6	126.822	6.206			-0.303	0.000141
1864	ENSMUST00000039662	liver.int.EAA	Tln2	talin 2	9	67.2211	0.838			0.303	0.000141
1865	ENSMUST00000190096	liver.int.EAA	Agap1	ArfGAP with GTPase domain, ankyrin repeat and PH domain 1	1	89.4549	1.394			0.303	0.000141
1866	ENSMUST00000056641	liver.int.EAA	Psd4	pleckstrin and Sec7 domain containing 4	2	24.3853	1.391			0.303	0.000141
1867	ENSMUST00000031985	liver.int.EAA	Mkrn1	makorin, ring finger protein, 1	6	39.3978	3.572			0.303	0.000141
1868	ENSMUST00000031378	liver.int.EAA	Stx2	syntaxin 2	5	128.985	2.628			0.303	0.000141
1869	ENSMUST00000102946	liver.int.EAA	Exoc2	exocyst complex component 2	13	30.8139	1.696			0.303	0.000142
1870	ENSMUST00000100680	liver.int.EAA	Stx2	syntaxin 2	5	128.985	2.694			0.303	0.000142
1871	ENSMUST00000061155	liver.int.EAA	Kif9	kinesin family member 9	9	110.477	0.235			0.303	0.000142
1872	ENSMUST00000058754	liver.int.EAA	Zmpste24	zinc metallopeptidase, STE24 (laminopathy, dermopathy)	4	121.059	3.779			0.303	0.000142
1873	ENSMUST00000108522	pan.EAA/liver.int.EAA	Sult2a1	sulfotransferase family 2A, dehydroepiandrosterone (DHEA)-preferring, member 1	7	13.7962	7.178	-0.302	0.000145	-0.303	0.000143
1874	ENSMUST00000187510	pan.EAA/liver.int.EAA	Chrm3	cholinergic receptor, muscarinic 3, cardiac	13	9.87548	0.494	0.254	0.00151	0.303	0.000143
1875	ENSMUST00000200083	pan.EAA/liver.int.EAA	Aspm	asp (abnormal spindle)-like, microcephaly associated (Drosophila)	1	139.455	0.066	0.253	0.00158	0.303	0.000143
1876	ENSMUST00000025288	pan.EAA/liver.int.EAA	Zfp521	zinc finger protein 521	18	13.687	0.132	0.245	0.00227	0.303	0.000143
1877	ENSMUST00000165935	liver.int.EAA	Pphln1	periphilin 1	15	93.3985	1.95			0.303	0.000143
1878	ENSMUST00000113194	liver.int.EAA	Armcx6	armadillo repeat containing, X-linked 6	X	134.748	0.282			0.303	0.000143
1879	ENSMUST00000171797	pan.EAA/liver.int.EAA	Nap1l1	nucleosome assembly protein 1-like 1	10	111.481	3.539	0.299	0.000173	0.302	0.000144
1880	ENSMUST00000034903	pan.EAA/liver.int.EAA	Gsta4	glutathione S-transferase, alpha 4	9	78.192	5.826	-0.29	0.000271	-0.303	0.000144
1881	ENSMUST00000075418	pan.EAA/liver.int.EAA	Stard5	StAR-related lipid transfer (START) domain containing 5	7	83.632	5.712	-0.249	0.00193	-0.303	0.000144
1882	ENSMUST00000038166	liver.int.EAA	Dhx57	DEAH (Asp-Glu-Ala-Asp/His) box polypeptide 57	17	80.2383	1.525			0.303	0.000144
1883	ENSMUST00000125308	liver.int.EAA	Gm15283	predicted gene 15283	12	73.9265	1.858			0.303	0.000144
1884	ENSMUST00000095476	liver.int.EAA	Lig4	ligase IV, DNA, ATP-dependent	8	9.97002	0.835			0.303	0.000144
1885	ENSMUST00000081525	liver.int.EAA	Paqr7	progestin and adipoQ receptor family member VII	4	134.497	4.435			0.303	0.000144
1886	ENSMUST00000079041	liver.int.EAA	Slc35e3	solute carrier family 35, member E3	10	117.734	2.142			0.302	0.000145
1887	ENSMUST00000090293	liver.int.EAA	Raph1	Ras association (RalGDS/AF-6) and pleckstrin homology domains 1	1	60.4907	2.508			0.302	0.000145
1888	ENSMUST00000170773	liver.int.EAA	Micall2	MICAL-like 2	5	139.707	0.909			0.302	0.000145
1889	ENSMUST00000167322	pan.EAA/liver.int.EAA	9030617O03Rik	RIKEN cDNA 9030617O03 gene	12	100.786	3.309	0.323	4.55e-05	0.302	0.000146
1890	ENSMUST00000028806	pan.EAA/liver.int.EAA	Smox	spermine oxidase	2	131.492	1.61	0.266	0.000889	0.302	0.000146
1891	ENSMUST00000177955	liver.int.EAA	Carkd	carbohydrate kinase domain containing	8	11.4975	5.316			-0.302	0.000146
1892	ENSMUST00000180068	liver.int.EAA	Yjefn3	YjeF N-terminal domain containing 3	8	69.8878	1.214			-0.302	0.000147
1893	ENSMUST00000179954	liver.int.EAA	Rpl31	ribosomal protein L31	1	39.3679	7.801			-0.302	0.000147
1894	ENSMUST00000092508	liver.int.EAA	Micu1	mitochondrial calcium uptake 1	10	59.7026	3.966			0.302	0.000147
1895	ENSMUST00000081752	liver.int.EAA	Olfm3	olfactomedin 3	3	114.904	0.511			0.302	0.000147
1896	ENSMUST00000027952	liver.int.EAA	Plxna2	plexin A2	1	194.62	1.373			0.302	0.000147
1897	ENSMUST00000085240	pan.EAA/liver.int.EAA	Gabrb3	gamma-aminobutyric acid (GABA) A receptor, subunit beta 3	7	57.4197	0.204	0.333	2.59e-05	0.302	0.000148
1898	ENSMUST00000038169	liver.int.EAA	Mif	macrophage migration inhibitory factor	10	75.8594	7.522			-0.302	0.000148
1899	ENSMUST00000075853	liver.int.EAA	Cks2	CDC28 protein kinase regulatory subunit 2	13	51.6452	4.055			-0.302	0.000148
1900	ENSMUST00000178079	liver.int.EAA	Rpl31	ribosomal protein L31	1	39.3679	8.17			-0.302	0.000149
1901	ENSMUST00000102483	liver.int.EAA	Rpl23a	ribosomal protein L23A	11	78.1809	8.24			-0.302	0.000149
1902	ENSMUST00000045743	liver.int.EAA	Prkab2	protein kinase, AMP-activated, beta 2 non-catalytic subunit	3	97.6582	0.556			0.302	0.000149
1903	ENSMUST00000091288	liver.int.EAA	Prnp	prion protein	2	131.91	4.095			0.302	0.000149
1904	ENSMUST00000005751	liver.int.EAA	Mrvi1	MRV integration site 1	7	110.868	0.348			0.302	0.000149
1905	ENSMUST00000074945	liver.int.EAA	Agap1	ArfGAP with GTPase domain, ankyrin repeat and PH domain 1	1	89.5802	1.036			0.302	0.000149
1906	ENSMUST00000171929	liver.int.EAA	Cenpf	centromere protein F	1	189.641	0.068			0.302	0.00015
1907	ENSMUST00000043589	liver.int.EAA	Kif16b	kinesin family member 16B	2	142.617	1.467			0.302	0.00015
1908	ENSMUST00000027373	liver.int.EAA	Ppm1f	protein phosphatase 1F (PP2C domain containing)	16	16.8965	2.656			0.302	0.00015
1909	ENSMUST00000119129	liver.int.EAA	Cdon	cell adhesion molecule-related/down-regulated by oncogenes	9	35.4216	0.285			0.302	0.00015
1910	ENSMUST00000097713	liver.int.EAA	Plekhm3	pleckstrin homology domain containing, family M, member 3	1	64.7891	0.374			0.302	0.00015
1911	ENSMUST00000040025	liver.int.EAA	Tln2	talin 2	9	67.2171	0.803			0.302	0.00015
1912	ENSMUST00000165984	pan.EAA/liver.int.EAA	Ccr2	chemokine (C-C motif) receptor 2	9	124.106	0.674	0.263	0.00104	0.302	0.000151
1913	ENSMUST00000058407	liver.int.EAA	Uqcr10	ubiquinol-cytochrome c reductase, complex III subunit X	11	4.70197	7.552			-0.302	0.000151
1914	ENSMUST00000042657	liver.int.EAA	Slc39a11	solute carrier family 39 (metal ion transporter), member 11	11	113.245	3.392			0.302	0.000151
1915	ENSMUST00000065388	liver.int.EAA	Supt7l	suppressor of Ty 7-like	5	31.5146	1.935			0.302	0.000151
1916	ENSMUST00000125758	liver.int.EAA	Mrvi1	MRV integration site 1	7	110.868	0.355			0.302	0.000151
1917	ENSMUST00000194746	liver.int.EAA	Rpl31	ribosomal protein L31	1	39.3679	7.642			-0.302	0.000152
1918	ENSMUST00000115056	liver.int.EAA	Dcaf12l1	DDB1 and CUL4 associated factor 12-like 1	X	44.7866	0.821			0.301	0.000152
1919	ENSMUST00000108126	liver.int.EAA	3110043O21Rik	RIKEN cDNA 3110043O21 gene	4	35.1913	1.545			0.302	0.000152
1920	ENSMUST00000014562	liver.int.EAA	Hps5	Hermansky-Pudlak syndrome 5 homolog (human)	7	46.7605	1.794			0.302	0.000152
1921	ENSMUST00000130509	pan.EAA/liver.int.EAA	Wdfy4	WD repeat and FYVE domain containing 4	14	32.9596	0.817	0.291	0.000264	0.301	0.000153
1922	ENSMUST00000106633	liver.int.EAA	Slc39a11	solute carrier family 39 (metal ion transporter), member 11	11	113.245	3.437			0.301	0.000153
1923	ENSMUST00000112896	liver.int.EAA	Tmem164	transmembrane protein 164	X	142.682	1.782			0.301	0.000153
1924	ENSMUST00000071539	liver.int.EAA	Slc39a11	solute carrier family 39 (metal ion transporter), member 11	11	113.245	3.448			0.301	0.000153
1925	ENSMUST00000021785	liver.int.EAA	Exoc2	exocyst complex component 2	13	30.8139	1.726			0.301	0.000153
1926	ENSMUST00000107239	liver.int.EAA	Zdhhc21	zinc finger, DHHC domain containing 21	4	82.8062	0.898			0.301	0.000153
1927	ENSMUST00000179445	pan.EAA/liver.int.EAA	Pitpna	phosphatidylinositol transfer protein, alpha	11	75.5881	5.029	0.338	1.92e-05	0.301	0.000154
1928	ENSMUST00000113124	liver.int.EAA	Mapkap1	mitogen-activated protein kinase associated protein 1	2	34.4069	3.922			0.301	0.000154
1929	ENSMUST00000060481	liver.int.EAA	Dcaf12l1	DDB1 and CUL4 associated factor 12-like 1	X	44.7866	0.819			0.301	0.000154
1930	ENSMUST00000053336	liver.int.EAA	2510009E07Rik	RIKEN cDNA 2510009E07 gene	16	21.649	1.354			0.301	0.000154
1931	ENSMUST00000106501	liver.int.EAA	Extl2	exostoses (multiple)-like 2	3	116.007	1.819			0.301	0.000154
1932	ENSMUST00000014445	liver.int.EAA	Pam16	presequence translocase-asssociated motor 16 homolog (S. cerevisiae)	16	4.61646	4.565			-0.301	0.000155
1933	ENSMUST00000051955	liver.int.EAA	Rps23	ribosomal protein S23	13	90.9231	7.881			-0.301	0.000155
1934	ENSMUST00000180365	liver.int.EAA	Yipf2	Yip1 domain family, member 2	9	21.5887	3.971			0.301	0.000155
1935	ENSMUST00000023454	liver.int.EAA	Dlg1	discs, large homolog 1 (Drosophila)	16	31.6641	3.355			0.301	0.000155
1936	ENSMUST00000006629	liver.int.EAA	Sptbn1	spectrin beta, non-erythrocytic 1	11	30.0994	3.132			0.301	0.000155
1937	ENSMUST00000066940	liver.int.EAA	Gtf2h2	general transcription factor II H, polypeptide 2	13	100.482	1.802			0.301	0.000155
1938	ENSMUST00000011877	liver.int.EAA	Sptbn1	spectrin beta, non-erythrocytic 1	11	30.0994	3.164			0.301	0.000155
1939	ENSMUST00000166880	liver.int.EAA	Olfr701	olfactory receptor 701	7	106.814	0.268			0.301	0.000155
1940	ENSMUST00000148844	liver.int.EAA	Gm12523	predicted gene 12523	3	108.284	1.304			0.301	0.000155
1941	ENSMUST00000025542	pan.EAA/liver.int.EAA	Psat1	phosphoserine aminotransferase 1	19	15.9047	0.496	0.271	0.000718	0.301	0.000156
1942	ENSMUST00000081554	pan.EAA/liver.int.EAA	P2rx4	purinergic receptor P2X, ligand-gated ion channel 4	5	122.708	4.937	0.255	0.00147	0.301	0.000156
1943	ENSMUST00000043627	liver.int.EAA	Mrpl12	mitochondrial ribosomal protein L12	11	120.485	6.344			-0.301	0.000156
1944	ENSMUST00000182024	liver.int.EAA	Rnf165	ring finger protein 165	18	77.4587	0.045			0.301	0.000156
1945	ENSMUST00000020311	liver.int.EAA	Micu1	mitochondrial calcium uptake 1	10	59.7026	3.948			0.301	0.000156
1946	ENSMUST00000072289	liver.int.EAA	Flot2	flotillin 2	11	78.0379	4.69			0.301	0.000156
1947	ENSMUST00000114947	liver.int.EAA	Kalrn	kalirin, RhoGEF kinase	16	34.178	0.177			0.301	0.000156
1948	ENSMUST00000082243	pan.EAA/liver.int.EAA	Spire1	spire homolog 1 (Drosophila)	18	67.4882	0.234	0.3	0.000169	0.301	0.000157
1949	ENSMUST00000045105	pan.EAA/liver.int.EAA	Spire1	spire homolog 1 (Drosophila)	18	67.4882	0.23	0.299	0.000173	0.301	0.000157
1950	ENSMUST00000137883	pan.EAA/liver.int.EAA	BC028777	cDNA sequence BC028777	17	24.2125	1.34	0.256	0.00138	0.301	0.000157
1951	ENSMUST00000043966	liver.int.EAA	Mrpl47	mitochondrial ribosomal protein L47	3	32.7254	2.957			-0.301	0.000157
1952	ENSMUST00000111749	liver.int.EAA	Sox5	SRY (sex determining region Y)-box 5	6	143.832	1.559			0.301	0.000157
1953	ENSMUST00000179353	liver.int.EAA	2022-09-02	septin 2	1	1900-04-02 11:29:44	4.309			0.301	0.000157
1954	ENSMUST00000190715	liver.int.EAA	Cep70	centrosomal protein 70	9	99.2435	0.562			0.301	0.000157
1955	ENSMUST00000036470	liver.int.EAA	Ccdc32	coiled-coil domain containing 32	2	119.018	2.29			-0.301	0.000158
1956	ENSMUST00000161977	liver.int.EAA	Fancc	Fanconi anemia, complementation group C	13	63.3115	1.129			0.301	0.000158
1957	ENSMUST00000117798	liver.int.EAA	Zfr2	zinc finger RNA binding protein 2	10	81.2332	0.175			0.301	0.000158
1958	ENSMUST00000121370	liver.int.EAA	Tbc1d1	TBC1 domain family, member 1	5	64.1598	1.09			0.301	0.000158
1959	ENSMUST00000150826	liver.int.EAA	Ccpg1	cell cycle progression 1	9	72.9856	3.943			0.301	0.000158
1960	ENSMUST00000088194	liver.int.EAA	Ndufa9	NADH dehydrogenase (ubiquinone) 1 alpha subcomplex, 9	6	126.822	6.418			-0.301	0.000159
1961	ENSMUST00000101198	liver.int.EAA	Tmem164	transmembrane protein 164	X	142.681	1.884			0.301	0.000159
1962	ENSMUST00000032228	liver.int.EAA	Mug1	murinoglobulin 1	6	121.839	8.127			0.301	0.00016
1963	ENSMUST00000203366	pan.EAA/liver.int.EAA	Add2	adducin 2 (beta)	6	86.0287	0.025	0.328	3.43e-05	0.3	0.000161
1964	ENSMUST00000021738	pan.EAA/liver.int.EAA	Gpr137b	G protein-coupled receptor 137B	13	13.3576	0.726	0.279	0.000477	0.3	0.000161
1965	ENSMUST00000079490	liver.int.EAA	Nap1l3	nucleosome assembly protein 1-like 3	X	122.395	0.29			0.3	0.000161
1966	ENSMUST00000127525	liver.int.EAA	9830144P21Rik	RIKEN cDNA 9830144P21 gene	2	129.206	1.325			0.3	0.000161
1967	ENSMUST00000189738	liver.int.EAA	Clasp1	CLIP associating protein 1	1	118.389	1.309			0.3	0.000161
1968	ENSMUST00000187713	liver.int.EAA	Clasp1	CLIP associating protein 1	1	118.389	1.31			0.3	0.000161
1969	ENSMUST00000201491	pan.EAA/liver.int.EAA	Mpv17	MpV17 mitochondrial inner membrane protein	5	31.1443	3.979	0.254	0.00151	0.3	0.000162
1970	ENSMUST00000012587	pan.EAA/liver.int.EAA	Kif11	kinesin family member 11	19	37.3764	0.281	0.251	0.00177	0.3	0.000162
1971	ENSMUST00000045855	liver.int.EAA	Hebp1	heme binding protein 1	6	135.138	7.83			-0.3	0.000162
1972	ENSMUST00000036333	liver.int.EAA	Prkx	protein kinase, X-linked	X	77.7614	1.073			0.3	0.000162
1973	ENSMUST00000108429	liver.int.EAA	Rps19	ribosomal protein S19	7	24.8847	7.783			-0.3	0.000163
1974	ENSMUST00000172165	liver.int.EAA	2022-09-02	septin 2	1	1900-04-02 11:29:44	4.316			0.3	0.000163
1975	ENSMUST00000078572	liver.int.EAA	Yipf2	Yip1 domain family, member 2	9	21.5887	4.029			0.3	0.000163
1976	ENSMUST00000111638	liver.int.EAA	Arntl2	aryl hydrocarbon receptor nuclear translocator-like 2	6	146.806	0.118			0.3	0.000164
1977	ENSMUST00000114664	liver.int.EAA	Mpzl3	myelin protein zero-like 3	9	45.0552	1.6			0.3	0.000164
1978	ENSMUST00000027495	liver.int.EAA	septin 2	septin 2	1	1900-04-02 11:29:42	4.096			0.3	0.000164
1979	ENSMUST00000086535	liver.int.EAA	Rpl31	ribosomal protein L31	1	39.3678	7.079			-0.3	0.000165
1980	ENSMUST00000087333	liver.int.EAA	Tmem164	transmembrane protein 164	X	142.681	1.819			0.3	0.000165
1981	ENSMUST00000030763	liver.int.EAA	Cdk14	cyclin-dependent kinase 14	5	4.80339	0.475			0.3	0.000165
1982	ENSMUST00000020157	liver.int.EAA	Apaf1	apoptotic peptidase activating factor 1	10	90.9893	0.572			0.3	0.000165
1983	ENSMUST00000076195	liver.int.EAA	Zfp935	zinc finger protein 935	13	62.4543	0.97			0.3	0.000165
1984	ENSMUST00000001202	liver.int.EAA	Ocrl	oculocerebrorenal syndrome of Lowe	X	47.9124	0.962			0.3	0.000165
1985	ENSMUST00000112751	pan.EAA/liver.int.EAA	Bcl2	B cell leukemia/lymphoma 2	1	106.538	0.492	0.276	0.000547	0.3	0.000166
1986	ENSMUST00000102845	liver.int.EAA	Rps27a	ribosomal protein S27A	11	29.5458	7.39			-0.3	0.000166
1987	ENSMUST00000198782	liver.int.EAA	Hax1	HCLS1 associated X-1	3	89.9956	5.547			-0.3	0.000166
1988	ENSMUST00000102844	liver.int.EAA	Rps27a	ribosomal protein S27A	11	29.5458	7.7			-0.3	0.000166
1989	ENSMUST00000110793	liver.int.EAA	Rpap1	RNA polymerase II associated protein 1	2	119.763	1.885			0.3	0.000166
1990	ENSMUST00000041806	liver.int.EAA	Psen1	presenilin 1	12	83.6882	3.863			0.3	0.000166
1991	ENSMUST00000186349	liver.int.EAA	Clasp1	CLIP associating protein 1	1	118.42	1.398			0.3	0.000166
1992	ENSMUST00000101195	liver.int.EAA	Tbc1d1	TBC1 domain family, member 1	5	64.1602	1.089			0.3	0.000166
1993	ENSMUST00000059498	liver.int.EAA	Edem3	ER degradation enhancer, mannosidase alpha-like 3	1	151.755	2.279			0.3	0.000166
1994	ENSMUST00000078200	liver.int.EAA	Brsk2	BR serine/threonine kinase 2	7	141.95	0.057			0.3	0.000166
1995	ENSMUST00000117534	pan.EAA/liver.int.EAA	St3gal2	ST3 beta-galactoside alpha-2,3-sialyltransferase 2	8	110.92	1.043	0.265	0.00094	0.3	0.000167
1996	ENSMUST00000073316	pan.EAA/liver.int.EAA	Foxm1	forkhead box M1	6	128.363	0.23	0.241	0.00272	0.3	0.000167
[truncated: 1,441 more rows]

## Sheet: 12b
Supplementary file 12b. Functional enrichment among gene expression correlates of pan-tissue general clock (pan-tissue EAA)
Enriched gene ontology, KEGG pathways, tissue expression; Mus musculus genome as background and gene symbol as identifier
Tissue and assay: (1) liver RNA-seq, (2) liver proteome, (3) adipose proteome
Analysis performed on DAVID (2021 update version): https://david.ncifcrf.gov/home.jsp
Index	Tissue	Assay	CorrelationDirection	Category	Term	Count	%	PValue	Genes	List Total	Pop Hits	Pop Total	Fold Enrichment	Bonferroni
1	1.Liver	RNA-seq	Negative	GOTERM_BP_DIRECT	GO:0055114~oxidation-reduction process	22	18.4874	1.4753e-10	CYB5A, NDUFB11, NDUFB5, FMO3, FMO4, CYP3A59, CYP2C29, FMO6, CYP2C39, SOD1, TM7SF2, CYP2C37, QDPR, HSD11B1, CYP26A1, CYP2C54, CYP2B10, IVD, CYP3A41A, CREG1, CYP3A41B, CYP1A2	103	676	18082	5.71328	7.19946e-08
2	1.Liver	RNA-seq	Negative	GOTERM_BP_DIRECT	GO:0008202~steroid metabolic process	8	6.72269	4.68436e-07	HSD11B1, CYP2B10, CYP1A2, PMVK, 0610007P14RIK, SULT2A2, SULT2A1, TM7SF2	103	84	18082	16.7194	0.000228571
3	1.Liver	RNA-seq	Negative	GOTERM_BP_DIRECT	GO:0019373~epoxygenase P450 pathway	5	4.20168	2.33643e-05	CYP2C37, CYP2C54, CYP2B10, CYP2C29, CYP2C39	103	30	18082	29.2589	0.0113372
4	1.Liver	RNA-seq	Negative	GOTERM_CC_DIRECT	GO:0031090~organelle membrane	15	12.605	1.28574e-16	CYB5A, MGST3, FMO3, FMO4, CYP2C29, FMO6, CYP2C39, TM7SF2, CYP2C37, CYP26A1, CYP2C54, CYP2B10, CYP3A41A, CYP3A41B, CYP1A2	110	94	19662	28.5232	1.46549e-14
5	1.Liver	RNA-seq	Negative	GOTERM_CC_DIRECT	GO:0005739~mitochondrion	29	24.3697	1.43596e-07	LIPT2, COX16, NDUFB11, MRPS14, NDUFB5, MPV17L, CISD1, PHB, ATP5O, MRPL55, GRPEL1, CHCHD7, RILP, RRP15, CYB5A, STARD5, URAH, TIMM21, GCAT, COQ5, SOD1, QDPR, GSTA4, CAPN10, IVD, JTB, MTFR1, ALDOC, AGXT	110	1721	19662	3.01198	1.89544e-05
6	1.Liver	RNA-seq	Negative	GOTERM_CC_DIRECT	GO:0005789~endoplasmic reticulum membrane	18	15.1261	3.65747e-07	CYB5A, MGST3, FMO3, FMO4, CYP2C29, FMO6, CYP2C39, CYP2C37, HSD11B1, CYP26A1, CYP2C54, DDRGK1, CYP2B10, CYP3A41A, CYP3A41B, CYP1A2, 0610007P14RIK, MRAP2	110	710	19662	4.53157	4.82775e-05
7	1.Liver	RNA-seq	Negative	GOTERM_CC_DIRECT	GO:0043231~intracellular membrane-bounded organelle	18	15.1261	7.97152e-07	CYB5A, MGST3, MPV17L, CISD1, FMO3, FMO4, CYP2C29, CYP2C39, TM7SF2, CYP2C37, HSD11B1, CYP26A1, CYP2C54, CAPN10, CYP2B10, CYP3A41A, CYP3A41B, CYP1A2	110	751	19662	4.28418	0.000105219
8	1.Liver	RNA-seq	Negative	GOTERM_CC_DIRECT	GO:0005783~endoplasmic reticulum	20	16.8067	0.000112904	CYB5A, MGST3, CNBP, ZFAND2B, FMO3, FMO4, CYP2C29, CYP2C39, TM7SF2, CYP2C37, HSD11B1, VPREB3, CYP26A1, APH1B, CYP2C54, DDRGK1, CYP2B10, CYP1A2, 0610007P14RIK, MRAP2	110	1323	19662	2.70212	0.0147936
9	1.Liver	RNA-seq	Negative	GOTERM_MF_DIRECT	GO:0070330~aromatase activity	8	6.72269	9.64804e-10	CYP2C37, CYP2C54, CYP2B10, CYP3A41A, CYP1A2, CYP3A41B, CYP2C29, CYP2C39	98	36	17446	39.5601	1.99714e-07
10	1.Liver	RNA-seq	Negative	GOTERM_MF_DIRECT	GO:0004497~monooxygenase activity	10	8.40336	8.65022e-09	CYP2C37, CYP26A1, CYP2C54, CYP2B10, CYP1A2, FMO3, FMO4, CYP2C29, FMO6, CYP2C39	98	108	17446	16.4834	1.79059e-06
11	1.Liver	RNA-seq	Negative	GOTERM_MF_DIRECT	GO:0016491~oxidoreductase activity	18	15.1261	3.39093e-08	BC089597, FMO3, FMO4, CYP2C29, CYP2C39, SOD1, TM7SF2, CYP2C37, QDPR, HSD11B1, CYP26A1, CYP2C54, CYP2B10, IVD, CYP3A41A, CREG1, CYP3A41B, CYP1A2	98	604	17446	5.30524	7.0192e-06
12	1.Liver	RNA-seq	Negative	GOTERM_MF_DIRECT	GO:0020037~heme binding	11	9.2437	4.72296e-08	CYP2C37, CYB5A, CYP26A1, CYP2C54, CYP2B10, CYP3A41A, CYP1A2, CYP3A41B, CYP3A59, CYP2C29, CYP2C39	98	175	17446	11.1899	9.77649e-06
13	1.Liver	RNA-seq	Negative	GOTERM_MF_DIRECT	GO:0005506~iron ion binding	11	9.2437	2.84538e-07	CYP2C37, CYP26A1, CYP2C54, CYP2B10, CYP3A41A, CYP1A2, CYP3A41B, CISD1, CYP3A59, CYP2C29, CYP2C39	98	212	17446	9.23691	5.88976e-05
14	1.Liver	RNA-seq	Negative	GOTERM_MF_DIRECT	GO:0016705~oxidoreductase activity, acting on paired donors, with incorporation or reduction of molecular oxygen	7	5.88235	1.86693e-05	CYP2C37, CYP26A1, CYP2C54, CYP2B10, CYP1A2, CYP2C29, CYP2C39	98	99	17446	12.5873	0.00385713
15	1.Liver	RNA-seq	Negative	GOTERM_MF_DIRECT	GO:0050661~NADP binding	5	4.20168	6.36168e-05	HSD11B1, FMO3, FMO4, FMO6, TM7SF2	98	39	17446	22.8231	0.0130828
16	1.Liver	RNA-seq	Negative	GOTERM_MF_DIRECT	GO:0008392~arachidonic acid epoxygenase activity	5	4.20168	0.000133342	CYP2C37, CYP2C54, CYP2B10, CYP2C29, CYP2C39	98	47	17446	18.9383	0.0272261
17	1.Liver	RNA-seq	Negative	GOTERM_MF_DIRECT	GO:0008395~steroid hydroxylase activity	5	4.20168	0.000229495	CYP2C37, CYP2C54, CYP2B10, CYP2C29, CYP2C39	98	54	17446	16.4834	0.0464
18	1.Liver	RNA-seq	Negative	KEGG_PATHWAY	mmu05204:Chemical carcinogenesis	14	11.7647	8.72449e-14	MGST3, GSTT2, CYP2C29, CYP2C39, CYP2C37, HSD11B1, GSTA4, CYP2C54, CYP2B10, GSTA2, CYP3A41A, CYP3A41B, CYP1A2, SULT2A1	59	92	7691	19.8368	7.06835e-12
19	1.Liver	RNA-seq	Negative	KEGG_PATHWAY	mmu00140:Steroid hormone biosynthesis	9	7.56303	2.33939e-07	CYP2C37, HSD11B1, CYP2C54, CYP2B10, CYP3A41A, CYP1A2, CYP3A41B, CYP2C29, CYP2C39	59	87	7691	13.4851	1.89489e-05
20	1.Liver	RNA-seq	Negative	KEGG_PATHWAY	mmu00830:Retinol metabolism	9	7.56303	2.79476e-07	CYP2C37, CYP26A1, CYP2C54, CYP2B10, CYP3A41A, CYP1A2, CYP3A41B, CYP2C29, CYP2C39	59	89	7691	13.1821	2.26373e-05
21	1.Liver	RNA-seq	Negative	KEGG_PATHWAY	mmu01100:Metabolic pathways	27	22.6891	3.57434e-07	LIPT2, GALNT11, MOCS2, NDUFB11, NDUFB5, ATP5O, CYP2C39, TM7SF2, CYP2C37, HSD11B1, CYP2C54, CYP2B10, PMVK, URAH, GCH1, CYP2C29, UPB1, COQ5, QDPR, CYP26A1, CYP3A41A, IVD, CYP1A2, CYP3A41B, ALDOC, AGXT, DCTPP1	59	1269	7691	2.77353	2.89517e-05
22	1.Liver	RNA-seq	Negative	KEGG_PATHWAY	mmu00982:Drug metabolism - cytochrome P450	8	6.72269	5.27135e-07	GSTA4, GSTA2, MGST3, CYP1A2, GSTT2, FMO3, FMO4, FMO6	59	66	7691	15.8007	4.26971e-05
23	1.Liver	RNA-seq	Negative	KEGG_PATHWAY	mmu00591:Linoleic acid metabolism	7	5.88235	1.73576e-06	CYP2C37, CYP2C54, CYP3A41A, CYP1A2, CYP3A41B, CYP2C29, CYP2C39	59	50	7691	18.2498	0.000140587
24	1.Liver	RNA-seq	Negative	KEGG_PATHWAY	mmu00980:Metabolism of xenobiotics by cytochrome P450	7	5.88235	7.54947e-06	HSD11B1, GSTA4, GSTA2, MGST3, CYP1A2, GSTT2, SULT2A1	59	64	7691	14.2577	0.000611322
25	1.Liver	RNA-seq	Negative	UP_TISSUE	Liver	54	45.3782	1.5531e-11	TMEM183A, RPLP1, ZFAND2B, CISD1, CYP3A59, CYP2C39, ASGR1, CES2A, CYP2C37, RPL7A, CYP2B10, RRP15, SULT2A2, SULT2A1, STARD5, IGFBP2, UPB1, GCAT, GCHFR, SLC22A26, IVD, ZFYVE19, CYP3A41A, CYP3A41B, MTFR1, AGXT, RPL28, HAMP2, SLC43A1, GSTT2, ATP5O, HSD11B1, APOM, GRPEL1, CYP2C54, CREG1, HACL1, E2F6, RILP, CYB5A, CNBP, FMO3, CYP2C29, SOD1, COQ5, GNMT, CYP26A1, SLC7A6OS, GSTA4, CFHR2, CAPN10, CYP1A2, HN…	115	4216	22371	2.49161	1.13376e-09
26	1.Liver	RNA-seq	Positive	GOTERM_BP_DIRECT	GO:0002376~immune system process	74	7.85563	4.02845e-27	CD86, NRROS, PIK3CD, IL27, PRDM1, IFIT1, IFIT3, ADGRE1, C1S1, DHX58, OLR1, FFAR2, TNFAIP8L2, JAK3, OASL1, HAVCR2, OASL2, HERC6, MB21D1, EOMES, TICAM2, DBNL, RSAD2, SYK, PRKCB, SP110, CD180, THEMIS, TAP2, TAP1, TMEM173, TLR1, FCGR1, FGR, HCK, NAIP5, NAIP6, OAS2, TLR12, TLR9, IRF7, TLR8, TLR7, SH2D1B1, ARHGEF2, SMPDL3B, TNFRSF21, H2-D1, TLR13, TLR2, LTF, C1QB, CSF1R, CLEC4A2, SRC, UNC93B1, CD5L, LY…	793	383	18082	4.40561	1.26977e-23
27	1.Liver	RNA-seq	Positive	GOTERM_BP_DIRECT	GO:0045087~innate immune response	69	7.32484	2.17977e-22	NRROS, PIK3CD, TREM2, IL27, PRDM1, IFIT1, IFIT3, C1S1, DHX58, TNFAIP8L2, JAK3, OASL1, CAMP, HAVCR2, OASL2, HERC6, MB21D1, FCER1G, TICAM2, RSAD2, SYK, SP110, CD180, MATK, CYBB, TMEM173, TLR1, FCGR1, FGR, HCK, NAIP5, TYROBP, NAIP6, ELF4, OAS2, TLR12, TLR9, IRF7, TLR8, TRIM59, TLR7, SH2D1B1, ARHGEF2, SMPDL3B, TRIM10, TLR13, TLR2, C1QB, CSF1R, CLEC4A2, NLRP1A, SRC, UNC93B1, LY96, OAS1A, NLRC4, LY9, R…	793	400	18082	3.93335	6.87065e-19
28	1.Liver	RNA-seq	Positive	GOTERM_BP_DIRECT	GO:0006954~inflammatory response	52	5.52017	1.75878e-14	NRROS, PIK3CD, TNFAIP3, IL27, CYSLTR1, C3AR1, OLR1, TNFRSF8, FFAR2, CCR5, HAVCR2, CCR2, TICAM2, SLC11A1, CD180, CYBB, TNFRSF1B, TLR1, HCK, NAIP5, NAIP6, TLR12, TLR9, TLR8, CHIL3, TLR7, SMPDL3B, TNFRSF21, TLR13, TLR2, CSF1R, NLRP1A, PTGER1, PTAFR, CD5L, C5AR1, FPR1, LY96, NLRC4, HDAC9, RELB, CLEC7A, CCL4, CCL3, NLRP3, GSDMD, SELE, NFKB2, P2RX7, SELP, THEMIS2, AXL	793	344	18082	3.44682	5.52909e-11
29	1.Liver	RNA-seq	Positive	GOTERM_BP_DIRECT	GO:0051607~defense response to virus	30	3.18471	1.89684e-10	CD86, SLFN8, UNC93B1, OAS1A, OAS1C, IFIT1, SLFN9, IFIT3, OAS1G, DHX58, ITGAX, NLRP3, IL12B, OASL1, OASL2, MB21D1, TICAM2, RSAD2, IL10RB, CARD9, EIF2AK2, ISG15, TMEM173, ISG20, OAS2, BCL2, TLR9, IFIT3B, TLR8, TLR7	793	167	18082	4.09617	5.97884e-07
30	1.Liver	RNA-seq	Positive	GOTERM_BP_DIRECT	GO:0009615~response to virus	17	1.80467	6.18722e-07	BATF3, RSAD2, SRC, EIF2AK2, OAS1A, IFIT1, DCLK1, IFIT3, ISG20, OAS2, CFL1, DHX58, TLR9, TLR8, OASL1, TLR13, OASL2	793	84	18082	4.61469	0.00194831
31	1.Liver	RNA-seq	Positive	GOTERM_BP_DIRECT	GO:0018108~peptidyl-tyrosine phosphorylation	15	1.59236	6.50063e-07	CSF1R, DYRK3, SYK, SRC, PDGFB, TTK, FGR, HCK, FER, MELK, ERBB4, ABI3, PTPN6, SH2D1B1, JAK3	793	65	18082	5.262	0.0020469
32	1.Liver	RNA-seq	Positive	GOTERM_BP_DIRECT	GO:0002250~adaptive immune response	21	2.2293	2.75265e-06	CD86, EOMES, CLEC4A2, DBNL, SYK, UNC93B1, PRKCB, THEMIS, TAP2, TAP1, PIK3CD, TNFRSF11A, PRDM1, LILRB4A, LY9, ADGRE1, SH2D1B1, JAK3, TNFRSF21, MYO1G, HAVCR2	793	139	18082	3.44491	0.00863883
33	1.Liver	RNA-seq	Positive	GOTERM_BP_DIRECT	GO:0002224~toll-like receptor signaling pathway	8	0.849257	3.98459e-06	TLR1, CD86, UNC93B1, CD180, TLR9, TLR8, TLR7, TLR2	793	17	18082	10.7304	0.0124809
34	1.Liver	RNA-seq	Positive	GOTERM_BP_DIRECT	GO:0032760~positive regulation of tumor necrosis factor production	13	1.38004	7.69576e-06	FCER1G, PTAFR, CARD9, LY96, PIK3R1, RASGRP1, CCL4, TLR9, CCL3, IL12B, ARHGEF2, CCR5, TLR2	793	59	18082	5.02417	0.0239653
35	1.Liver	RNA-seq	Positive	GOTERM_BP_DIRECT	GO:0007067~mitotic nuclear division	30	3.18471	1.32966e-05	ERCC6L, NCAPG2, CCNF, CDCA8, KIF11, NSL1, AURKB, NCAPH, CCNB2, DSN1, HAUS8, MIS18BP1, NUF2, NUSAP1, KNTC1, SPDL1, CEP55, SPAG5, UBE2C, KNSTRN, CDC25B, CCNA2, CENPE, ASPM, ESPL1, INCENP, KIF2C, ARHGEF2, ARL8A, SPC25	793	277	18082	2.46953	0.0410449
36	1.Liver	RNA-seq	Positive	GOTERM_BP_DIRECT	GO:0032496~response to lipopolysaccharide	24	2.54777	1.82908e-05	VCAM1, STAT1, PTGER1, NCF2, IL10RA, SLC11A1, PTAFR, C5AR1, EIF2AK2, LY96, PPBP, TNFRSF11A, TNFRSF1B, MPO, NFKB2, P2RX7, ABR, FER, PLCG2, TNFRSF8, TNFRSF21, ELANE, SNCA, TLR2	793	197	18082	2.77791	0.0560228
37	1.Liver	RNA-seq	Positive	GOTERM_CC_DIRECT	GO:0016020~membrane	468	49.6815	3.12284e-30	TFRC, SLC4A1, SCAMP5, PREX1, COMTD1, CAPNS1, C3AR1, MPV17, VSTM4, GTSE1, ANKS1B, UNC13B, PRKCH, PRKCB, UNC5B, SYTL4, TMEM80, GABRG1, ORAI2, H2-D1, ASTN1, PDGFB, FPR1, LILR4B, ABCB9, IQGAP1, LY9, NCAPH, ABR, CHST11, PCDHA1, PRKAR2B, PLCG2, PCDHA5, PCDHA4, NCKAP1L, PCDHA3, PCDHA9, PCDHA8, PCDHA7, ST3GAL2, PCDHA6, GSDMD, GPR12, HOMER1, EIF2AK2, BTBD11, TREML1, GRIN3B, EHD4, TREML4, CDK14, XKR6, FERM…	864	6998	19662	1.5219	1.53956e-27
38	1.Liver	RNA-seq	Positive	GOTERM_CC_DIRECT	GO:0005886~plasma membrane	284	30.1486	3.91799e-08	EPHB6, TFRC, SLC4A1, ACTB, SCAMP5, PREX1, CAPNS1, C3AR1, PTGFRN, SYNPO, VSTM4, ANKS1B, UNC13B, ARSA, PRKCH, PRKCB, UNC5B, ACTN1, SLC11A1, SLC11A2, SYTL4, GABRG1, BTC, KEL, ADGRB3, H2-D1, ASTN1, STXBP2, SDC3, LPAR1, FPR1, SLCO5A1, IQGAP1, PIK3R1, LY9, PCDH17, TRPM2, ABR, NKAIN3, RACGAP1, PCDHA1, PRKAR2B, INPP5D, PCDHA5, PLCG2, PCDHA4, TSPAN5, PCDHA3, PCDHA2, PCDHA9, SCN3B, PCDHA8, PCDHA7, PCDHA6, …	864	4874	19662	1.32601	1.93155e-05
39	1.Liver	RNA-seq	Positive	GOTERM_CC_DIRECT	GO:0002102~podosome	11	1.16773	6.73537e-07	DBNL, VCAM1, BIN2, WDR1, SRC, TPM3, SH3PXD2B, ARHGEF2, LCP1, ACTB, FERMT3	864	32	19662	7.8227	0.000331999
40	1.Liver	RNA-seq	Positive	GOTERM_CC_DIRECT	GO:0005737~cytoplasm	358	38.0042	1.00688e-06	GLTP, ANKLE1, 1810011O10RIK, TFRC, CCNF, PITPNA, IFIT1, MKI67, IFIT3, ACTB, PREX1, RASSF2, LGALS1, CAPNS1, UBASH3B, RPS6KA1, DHX58, DZIP1L, IL12B, EIF2D, SYNPO, GTSE1, SOX4, HERC6, ANKS1B, UNC13B, ARSA, PRKCH, PRKCB, ACTN1, SLC11A2, KRT8, SYTL4, KNSTRN, RUNX2, RUNX1, SHTN1, BIN2, DDIT3, KCTD17, PFN1, TRIM10, OBSL1, EXD1, STXBP2, PDGFB, LPAR1, CDCA8, IQGAP1, PIK3R1, EVPL, KALRN, TTBK1, NCAPH, DSN1…	864	6631	19662	1.22862	0.000496271
41	1.Liver	RNA-seq	Positive	GOTERM_CC_DIRECT	GO:0070062~extracellular exosome	167	17.7282	1.51469e-06	GLTP, CD86, TFRC, CLSTN3, PITPNA, SLC4A1, METRNL, MPO, ALDH1L2, ACTB, CNDP2, STK10, LGALS1, C1S1, CAPNS1, LAMP1, BASP1, CFL1, TUBB1, COTL1, SIRPA, TNFRSF8, KPNA4, CAPN1, KIFAP3, PHLDA3, ARSA, TOR3A, HIST1H2AO, ENTPD1, SLC38A1, PRKCH, GBP9, PRKCB, TPM3, ACTN1, KRT8, SHISA5, HIST1H2AP, PROCR, CRISPLD2, FCGR4, PFN1, H2-D1, ARL8A, CARD11, ATP6V1A, STXBP2, LPL, LILR4B, IQGAP1, KALRN, EVPL, PLD3, MYL12…	864	2674	19662	1.42125	0.000746462
42	1.Liver	RNA-seq	Positive	GOTERM_CC_DIRECT	GO:0005856~cytoskeleton	82	8.70488	4.96238e-06	WDR1, SH3KBP1, CCNF, KIF11, ESPN, PPP1R18, ACTB, TUBB1, CFL1, DZIP1L, NUSAP1, COTL1, KNTC1, KIF1A, SPDL1, SYNPO, GTSE1, JAK3, DLGAP5, CEP55, DBNL, TPM3, ACTN1, KNSTRN, CTTNBP2NL, KIF4, CDC25B, DNM3, FGR, APBB1IP, ASPM, HCK, SHTN1, FRMD8, INCENP, EVL, KIF2C, LCP1, ARHGEF2, PFN1, DOCK2, GAS8, DYNC1I2, SRC, FBLIM1, MVP, STK39, WAS, CDCA8, KALRN, EVPL, AURKB, FGD2, RELB, ADD2, SPTA1, FGD3, SDCBP, PDL…	864	1113	19662	1.67661	0.00244347
43	1.Liver	RNA-seq	Positive	GOTERM_CC_DIRECT	GO:0014069~postsynaptic density	28	2.9724	6.87938e-06	SRC, CLSTN3, KALRN, ACTB, ADD2, PAK1, GNG3, ERBB4, PALM, SYNPO, DISC1, GRIA3, ANKS1B, CAP2, ENTPD1, DMTN, DBNL, HOMER1, SYN3, SYN1, DCLK1, DNM3, P2RX4, ADORA2A, SYT11, EXOC4, ARHGEF2, DBN1	864	239	19662	2.66609	0.0033858
44	1.Liver	RNA-seq	Positive	GOTERM_CC_DIRECT	GO:0032009~early phagosome	6	0.636943	8.07347e-06	UNC13B, SYK, SYT11, UNC93B1, TLR9, TLR7	864	8	19662	17.0677	0.00397233
45	1.Liver	RNA-seq	Positive	GOTERM_CC_DIRECT	GO:0005887~integral component of plasma membrane	81	8.59873	1.38567e-05	RET, EPHB6, GABRB3, ACVRL1, CHRM3, TFRC, TCAM1, SLC4A1, HTR2A, EDA2R, SLC8A1, SLC4A5, GM14085, SLC22A12, MRC2, CYSLTR1, CYSLTR2, C3AR1, TNFRSF8, SIRPA, FFAR1, CLEC1B, SLC16A3, CCR2, TMEM150B, ABCC1, SLC38A1, FCER1G, GP1BB, GPR35, CD180, AVPR2, KCNK13, SLC11A2, PLAUR, CYBB, TNFRSF1B, SSTR2, TLR1, SLC7A6, MTNR1A, SLC7A7, ADORA2A, SLC7A8, TLR7, TNFRSF21, SLC22A3, GYPA, SLC43A2, PTGER1, PTAFR, C5AR1,…	864	1126	19662	1.63704	0.00680814
46	1.Liver	RNA-seq	Positive	GOTERM_CC_DIRECT	GO:0009986~cell surface	52	5.52017	1.8966e-05	EPHB6, ACVRL1, CD86, TFRC, CLSTN3, ITGB3, ITGB2, SLC4A1, MRC2, LGALS1, LAMP1, ITGAX, PTGFRN, CCR5, HAVCR2, CTSB, ENTPD1, FCER1G, ANXA2, NFAM1, SLC11A1, SLC11A2, APOA4, ANO6, PROCR, GPRC5B, TYROBP, FCGR4, LY6D, CD44, H2-D1, TLR2, LTF, CSF1R, CLEC12A, SDC3, C5AR1, LPAR1, PDGFB, SLC1A3, LPL, TNFRSF11A, LY9, SCUBE1, ELANE, VCAM1, TRPV2, SULF1, TREML1, LRFN2, MAS1, AXL	864	629	19662	1.88134	0.00930673
47	1.Liver	RNA-seq	Positive	GOTERM_CC_DIRECT	GO:0005764~lysosome	33	3.50318	2.59902e-05	SRC, UNC93B1, TNFAIP3, PRCP, ABCB9, MPO, TRPM2, DRAM1, LAMP1, PSAP, CAPN1, SLC15A3, CTSD, CTSB, CTSA, UVRAG, ARSA, TMEM150B, SLC11A1, LAPTM5, MYO5A, TM6SF1, HCK, MMP13, SYT11, TLR9, MAN2B1, TLR7, CD68, RAB7B, ATP6V0C, ARL8A, ENGASE	864	331	19662	2.26882	0.0127316
48	1.Liver	RNA-seq	Positive	GOTERM_CC_DIRECT	GO:0030863~cortical cytoskeleton	9	0.955414	4.2733e-05	SPTA1, DMTN, TPM3, INPP5D, ACTN1, FLNA, SLC4A1, SELE, ACTB	864	31	19662	6.60685	0.0208475
49	1.Liver	RNA-seq	Positive	GOTERM_CC_DIRECT	GO:0000775~chromosome, centromeric region	19	2.01699	4.64129e-05	UVRAG, ERCC6L, SPAG5, CDCA8, MKI67, KNSTRN, NSL1, AURKB, CENPE, DSN1, RASSF2, MIS18BP1, INCENP, NUF2, CENPL, KIF2C, KNTC1, SPDL1, SPC25	864	141	19662	3.06654	0.0226223
50	1.Liver	RNA-seq	Positive	GOTERM_CC_DIRECT	GO:0043198~dendritic shaft	12	1.27389	6.11273e-05	PREX1, HOMER1, PRKAR2B, EXOC4, LPAR1, FLNA, ARHGEF2, HTR2A, DBN1, GRIA3, SLC8A1, HCN2	864	61	19662	4.47678	0.0296871
51	1.Liver	RNA-seq	Positive	GOTERM_MF_DIRECT	GO:0005515~protein binding	252	26.7516	3.04061e-10	SPI1, TFRC, SLC4A1, IFIT1, IFIT3, ACTB, RASSF2, LGALS1, UBASH3B, KIFAP3, ANKS1B, ACOT9, PRKCH, RSAD2, PRKCB, UNC5B, ACTN1, KRT8, SYTL4, KNSTRN, RUNX2, RUNX1, SHTN1, ADGRB3, DDIT3, PFN1, TRIM10, H2-D1, ASTN1, CTBP2, EBI3, STXBP2, CDCA8, IQGAP1, PIK3R1, KALRN, INPP5D, PLCG2, PCDHA4, PCDHA7, ZBTB7C, CTSA, EGR2, HOMER1, EIF2AK2, MYO5A, GDF3, BTBD10, TREML1, CCDC88A, EHD4, TREML4, UNC119, FERMT3, CEP8…	757	4092	17446	1.41927	2.78215e-07
52	1.Liver	RNA-seq	Positive	GOTERM_MF_DIRECT	GO:0005524~ATP binding	117	12.4204	5.40153e-10	EPHB6, ERCC6L, MKI67, ACTB, STK10, KIF5C, RPS6KA1, DHX58, PDK3, MB21D1, TOR3A, ENTPD1, PRKCH, PRKCB, MATK, TAP2, TAP1, CHD1L, RUNX2, RUNX1, NAIP5, MELK, NAIP6, SLFN14, ABCG3, NAIP1, ABCG1, ATP6V1A, CSF1R, STK39, ABCB9, PKMYT1, KALRN, AK7, TTBK1, TKFC, FIGNL1, NLRP3, ATP8B4, MLKL, ATP8B2, UBE2C, EIF2AK2, MYO5A, DCLK1, FER, EHD4, ALDH18A1, CDK14, RET, TOP2A, ACVRL1, DYRK3, LRGUK, PIK3CD, AATK, KIF1…	757	1507	17446	1.78926	4.94239e-07
53	1.Liver	RNA-seq	Positive	GOTERM_MF_DIRECT	GO:0003779~actin binding	37	3.92781	6.31143e-07	HIP1, WDR1, HPCA, WAS, CAPG, SLC4A1, ESPN, PPP1R18, ADD2, SPTA1, CFL1, COTL1, FLNA, SYNPO, CCR5, YWHAH, CAP2, CAP1, DMTN, DBNL, TPM3, ACTN1, MYO5A, MYO9A, CCDC88A, FER, MARCKS, FMNL1, PARVG, SPIRE1, HCLS1, EVL, LCP1, PFN1, DBN1, MYO1F, MYO1G	757	338	17446	2.52281	0.000577329
54	1.Liver	RNA-seq	Positive	GOTERM_MF_DIRECT	GO:0005509~calcium ion binding	59	6.26327	1.59138e-06	RET, CLSTN3, EFCAB3, SLC8A1, ADGRE1, C1S1, MMP27, CAPNS1, CAPN1, PCDHAC2, PCDHAC1, TPD52, ARSA, ANXA2, ACTN1, ANXA5, TBC1D9, PLA2G4A, PCDHA12, PCDHA11, SYTL4, MMP12, MMP13, MELK, MMP17, CDHR5, LCP1, PLCB2, CDH18, MATN2, HPCA, SRI, CACNA1E, LTBP1, RASGRP1, PCDH17, MYL12B, SPTA1, TRPM2, SCUBE1, PCDHA1, PCDHA5, PCDHA4, PCDHA3, PCDHA2, PCDHA9, PCDHA8, PCDHA7, S100A11, SNCA, PCDHA6, PCDH9, GALNT3, MYO…	757	699	17446	1.94525	0.00145506
55	1.Liver	RNA-seq	Positive	GOTERM_MF_DIRECT	GO:0003725~double-stranded RNA binding	14	1.4862	8.27009e-06	TFRC, ACTN1, EIF2AK2, OAS1A, OAS1C, OAS1G, OAS2, DHX58, TLR8, TLR7, VIM, OASL1, TLR13, OASL2	757	70	17446	4.60925	0.00753861
56	1.Liver	RNA-seq	Positive	GOTERM_MF_DIRECT	GO:0005543~phospholipid binding	15	1.59236	2.38934e-05	PSD, HIP1, TICAM2, PLEKHA2, PTAFR, PITPNA, MYOF, LPAR1, SYTL4, PREX1, BIN2, PITPNM1, PLCB2, WDFY4, SNCA	757	88	17446	3.92834	0.0216255
57	1.Liver	RNA-seq	Positive	GOTERM_MF_DIRECT	GO:0001730~2'-5'-oligoadenylate synthetase activity	6	0.636943	5.60134e-05	OAS2, OAS1A, OAS1C, OASL1, OAS1G, OASL2	757	11	17446	12.5707	0.0499624
58	1.Liver	RNA-seq	Positive	GOTERM_MF_DIRECT	GO:0030246~carbohydrate binding	25	2.65393	5.94222e-05	CLEC4A1, CLEC4A3, CLEC4A2, CLEC12A, GALNT10, SIGLECE, MRC2, LGALS1, CLEC7A, OLR1, CLEC1B, GALNT6, CLEC4B1, CD72, GALNT3, KLRA17, SELE, SELP, MAG, G6PDX, MAN2B1, CHIL3, SIGLEC1, CD22, ADGRL3	757	229	17446	2.51596	0.0529212
59	1.Liver	RNA-seq	Positive	KEGG_PATHWAY	mmu04380:Osteoclast differentiation	22	2.33546	4.31407e-07	SIRPB1B, SIRPB1A, CSF1R, SPI1, SYK, STAT1, NCF2, ITGB3, CYBB, PIK3CD, TREM2, TNFRSF11A, PIK3R1, RELB, NFKB2, FCGR1, TYROBP, FCGR4, BLNK, PLCG2, SIRPA, LCP2	368	126	7691	3.64911	0.000103532
60	1.Liver	RNA-seq	Positive	KEGG_PATHWAY	mmu05152:Tuberculosis	25	2.65393	2.81847e-06	CAMK2D, SRC, ITGB2, MRC2, LAMP1, CLEC7A, ITGAX, IL12B, CTSD, CAMP, FCER1G, APAF1, ATP6AP1, SYK, IL10RB, STAT1, IL10RA, CARD9, TLR1, FCGR1, FCGR4, BCL2, TLR9, ATP6V0C, TLR2	368	176	7691	2.96867	0.000676206
61	1.Liver	RNA-seq	Positive	KEGG_PATHWAY	mmu04611:Platelet activation	21	2.2293	3.3711e-06	FCER1G, SYK, GP1BB, SRC, ITGB3, ADCY3, PIK3CD, PLA2G4A, PIK3R1, ADCY7, RASGRP1, ACTB, MYL12B, APBB1IP, TBXAS1, PLCG2, PRKG2, LCP2, PLCB2, FERMT3, F2RL3	368	131	7691	3.35029	0.000808737
62	1.Liver	RNA-seq	Positive	KEGG_PATHWAY	mmu04145:Phagosome	23	2.44161	1.89238e-05	ATP6V1A, DYNC1I2, H2-T22, ATP6AP1, TFRC, NCF2, ITGB3, ITGB2, TAP2, TAP1, MPO, ACTB, FCGR1, MRC2, LAMP1, CLEC7A, FCGR4, TUBB1, OLR1, RAB7B, ATP6V0C, H2-D1, TLR2	368	171	7691	2.81104	0.00453147
63	1.Liver	RNA-seq	Positive	KEGG_PATHWAY	mmu04666:Fc gamma R-mediated phagocytosis	15	1.59236	3.72174e-05	VAV3, SYK, PRKCB, WAS, PIK3CD, PIK3R1, VAV1, FCGR1, HCK, PAK1, MARCKS, INPP5D, CFL1, PLCG2, DOCK2	368	84	7691	3.73205	0.00889257
64	1.Liver	RNA-seq	Positive	KEGG_PATHWAY	mmu04062:Chemokine signaling pathway	24	2.54777	5.43472e-05	VAV3, CX3CR1, SRC, STAT1, WAS, ADCY3, PIK3CD, PPBP, PIK3R1, ADCY7, VAV1, CXCL16, FGR, PREX1, HCK, PAK1, GNG3, CCL4, CCL3, DOCK2, CCR5, JAK3, PLCB2, CCR2	368	196	7691	2.55912	0.012959
65	1.Liver	RNA-seq	Positive	KEGG_PATHWAY	mmu04810:Regulation of actin cytoskeleton	25	2.65393	7.23546e-05	CHRM3, SRC, ITGB3, ITGB2, PDGFB, WAS, PIK3CD, PIK3R1, ITGAE, IQGAP1, FGF2, ACTB, MYL12B, FGD3, PAK1, CFL1, ITGAX, NCKAP1L, VAV3, ACTN1, VAV1, ITGAD, PFN1, FGF11, ARHGEF6	368	213	7691	2.45299	0.0172158
66	1.Liver	RNA-seq	Positive	KEGG_PATHWAY	mmu05150:Staphylococcus aureus infection	11	1.16773	0.000100363	FCGR1, C1QB, SELP, C1S1, FCGR4, C5AR1, PTAFR, ITGB2, FPR1, C3AR1, C1QC	368	50	7691	4.59788	0.0238005
67	1.Liver	RNA-seq	Positive	UP_TISSUE	Macrophage	82	8.70488	6.63907e-19	TOP2A, ACVRL1, CD86, SPI1, HIP1, NCF2, SH3KBP1, IFI211, TREM2, PPP1R18, RPS6KA1, SH3PXD2B, MFSD1, GTSE1, SLC16A3, CEP55, ABCC1, SLC38A1, SP110, NFAM1, SLC11A2, PLAUR, PLA2G4A, MFSD11, PARP9, GMIP, CTTNBP2NL, TLR1, FCGR1, MMP12, FGR, APBB1IP, HCK, MELK, INCENP, TLR9, LCP2, EVL, CHIL3, TLR7, ARHGEF2, PLEKHO2, RAB7B, CD44, H2-D1, TLR2, ARHGEF6, C1QB, CSF1R, PTAFR, C5AR1, FAM129A, WAS, PPM1H, LPL, IQ…	881	689	22371	3.02207	1.38093e-16
68	1.Liver	RNA-seq	Positive	UP_TISSUE	Bone marrow	142	15.0743	2.13976e-12	SPI1, PITPNA, IFIT1, MPO, IFIT3, ACTB, CNDP2, CXCL16, UBASH3B, DHX58, COTL1, CAR13, CAPN1, MPV17, SLC16A3, HERC6, TOR3A, TICAM2, RSAD2, TPM3, SP110, KLRA17, SLC11A1, TAP2, CYBB, TAP1, MTHFD2, CHIL3, PFN1, ATP6V1A, RNF180, SDC3, C5AR1, PLD4, LPL, LILR4B, TOR1AIP2, ARHGAP17, CSF2RB, CSF2RA, PLD3, ITPRIPL2, HCAR2, SDCBP, SNN, SERPINA3F, UAP1L1, PSAP, MBP, NCKAP1L, PLTP, GDF3, BC026585, NFKB2, TREML1…	881	1981	22371	1.82018	4.45064e-10
69	1.Liver	RNA-seq	Positive	UP_TISSUE	Spleen	93	9.87261	1.09431e-09	CD86, SIRPB1A, ALAS2, WDR1, NCF2, ITGB3, PIK3CD, SLC4A1, FGF2, ACTB, ESM1, TIFAB, RPS6KA1, IL12B, CLEC1B, CCR5, JAK3, HAVCR2, OASL2, TOR3A, DBNL, APAF1, FCRL5, SYK, NFAM1, RHOG, GAB3, TMEM173, VAV1, TLR1, PROCR, HCK, NAIP5, SLC7A6, 4930402H24RIK, KEL, RASA4, NAIP6, G6PDX, TFEC, DPEP2, IRF7, TLR8, AIDA, ABCG3, TRIM10, NAIP1, H2-D1, HEMGN, SLC43A2, UNC93B1, UHRF1, NLRC4, ARHGAP15, LY9, DDO, FGD2, A…	881	1214	22371	1.94524	2.27616e-07
70	1.Liver	RNA-seq	Positive	UP_TISSUE	Activated spleen	63	6.6879	1.29994e-09	GLTP, CD86, ALAS2, CD83, WDR1, SH3KBP1, PLEK, PIK3CD, TNFAIP3, SLC4A1, IFIT1, GALNT10, CNDP2, ADAMTS4, PREX1, C1S1, LAMP1, GRAP2, COTL1, MFSD1, SYNPO, CAP1, EOMES, PRKCH, CD180, CYP7B1, VAV1, CDC25B, FGR, ITGAD, TFEC, TLR7, LCP1, PLEKHO2, CLEC4A3, NLRP1A, NLRC4, COCH, FYB, FGD2, RHD, RELB, PROKR1, CYTH4, CCL4, SLAMF8, E2F2, CDR2, UVRAG, CMTM3, STAT1, LHFP, LAPTM5, PPBP, TM6SF1, PARP12, PKIB, ABI3…	881	690	22371	2.31847	2.70387e-07
71	1.Liver	RNA-seq	Positive	UP_TISSUE	Thymus	177	18.7898	2.26595e-07	EPHB6, A130051J06RIK, CD86, SAMD9L, TFRC, SLA, IKZF2, ACTB, STK10, GRAP2, CFL1, NUSAP1, IL12B, CAPN1, MPV17, SOX4, HERC6, TPD52, TOR3A, HIST1H2AO, TICAM2, GBP9, TPM3, SP110, MATK, KRT8, SHISA5, TAP1, HIST1H2AP, WDR76, RUNX1, CDC25B, NAIP5, DEPDC1A, FRMD8, GM9888, GM6377, CARD11, SLC22A3, KCNE4, STXBP2, PLD4, TOR1AIP2, SLCO5A1, ABCB9, PIK3R1, IQGAP1, ARHGAP15, KALRN, LY9, ABR, SDCBP, PTDSS1, SCUBE…	881	3108	22371	1.44611	4.71307e-05
72	1.Liver	RNA-seq	Positive	UP_TISSUE	Bone	31	3.29087	3.96049e-06	GYPA, TRIM30A, NCF2, GM4070, AATK, ARHGAP17, SLC4A1, SLFN9, HK3, FBXO40, TIFAB, PGM3, CAR13, STAP1, DLGAP5, SLC37A2, RSAD2, SYK, GPR35, ARHGAP25, FGR, EXOC4, TLR12, GM11149, CHIL3, TLR7, LCP2, LRP11, TMEM229B, LTF, F2RL3	881	304	22371	2.58939	0.000823444
73	1.Liver	RNA-seq	Positive	UP_TISSUE	Mast cell	28	2.9724	6.37604e-05	TFRC, WAS, SLA, CSF2RB, PIK3R1, FYB, INPP5D, CFL1, PLCG2, CD300LB, STAP1, PGM1, LRRC25, FCER1G, SYK, LAPTM5, TBCB, VAV1, PTPRE, FER, P2RX4, TYROBP, G6PDX, HCLS1, PTPN6, LCP2, VIM, PFKP	881	301	22371	2.36211	0.013175
74	1.Liver	RNA-seq	Positive	UP_TISSUE	Dendritic cell	20	2.12314	0.00021623	TPD52, ACOT9, MLKL, NCF2, FAM129A, ANO6, ARHGAP25, MMP12, BSCL2, TIFAB, UBASH3B, AIFM2, CLEC7A, SH3PXD2B, DPEP2, CENPL, ITGAX, ARHGEF2, SH2D1B1, MFGE8	881	192	22371	2.64508	0.0439841
75	2.Liver	Proteome	Negative	GOTERM_BP_DIRECT	GO:0055114~oxidation-reduction process	76	30.7692	4.38916e-48	DMGDH, ALDH1L1, KDM1A, RDH7, CYP3A11, ALDH1L2, CYP2C39, CYP2C38, CYP2C37, NSDHL, CYP2D11, CYP2D10, AIFM1, FTH1, ACAD10, AASS, BCKDHA, CBR1, DCXR, BCKDHB, SDHC, SDHA, KMO, SDHB, CYP2D26, ALDH1A3, POR, MTHFD1, ETHE1, IVD, CYP3A41A, CHDH, UQCRC1, CYP2C40, L2HGDH, HPD, ALDH9A1, MAOB, AKR1D1, NDUFB3, UQCR11, HSD17B6, HSD11B1, ALDH1B1, CYP2A12, RDH11, CYP2C54, CREG1, CYP2C50, CYC1, CRYM, FDFT1, CYB5B, …	244	676	18082	8.33151	5.12654e-45
76	2.Liver	Proteome	Negative	GOTERM_BP_DIRECT	GO:0008152~metabolic process	39	15.7895	2.13452e-19	ALDH1L1, ACSS2, MVK, ACY1, ACSM5, EPRS, ALDH1L2, PAPSS2, ACAT2, PAPSS1, NADK2, ATIC, ALDH1B1, AFMID, DBT, ACAD10, AASS, FDFT1, BCKDHA, HMGCS1, BCKDHB, CAD, HOGA1, UPB1, HDHD3, ALDH4A1, ALDH1A3, GSTA4, CPS1, MTHFD1, IVD, ACO2, ALDH8A1, UMPS, GSTM7, SLC27A2, SLC27A5, GNE, ALDH9A1	244	463	18082	6.24224	2.49312e-16
77	2.Liver	Proteome	Negative	GOTERM_BP_DIRECT	GO:0008202~steroid metabolic process	16	6.47773	3.55043e-13	FDPS, MVK, HMGCS1, AKR1D1, DHCR24, HSD17B6, CYP51, SULT1A1, HSD11B1, NSDHL, CYP1A2, CYP1A1, 0610007P14RIK, SULT2A2, FDFT1, SULT2A1	244	84	18082	14.1155	4.14698e-10
78	2.Liver	Proteome	Negative	GOTERM_BP_DIRECT	GO:0019373~epoxygenase P450 pathway	10	4.04858	1.37952e-10	CYP2C37, CYP2A5, CYP2A4, CYP2C54, CYP2A12, CYP2C40, CYP2C50, CYP2C29, CYP2C39, CYP2C38	244	30	18082	24.7022	1.61128e-07
79	2.Liver	Proteome	Negative	GOTERM_BP_DIRECT	GO:0006695~cholesterol biosynthetic process	10	4.04858	2.64195e-10	FDPS, IDI1, NSDHL, MVK, HMGCS1, CES1D, DHCR24, LSS, CYP51, FDFT1	244	32	18082	23.1583	3.0858e-07
80	2.Liver	Proteome	Negative	GOTERM_BP_DIRECT	GO:0016126~sterol biosynthetic process	9	3.64372	1.68856e-09	FDPS, SQLE, NSDHL, MVK, HMGCS1, DHCR24, 0610007P14RIK, CYP51, FDFT1	244	27	18082	24.7022	1.97224e-06
81	2.Liver	Proteome	Negative	GOTERM_BP_DIRECT	GO:0006629~lipid metabolic process	25	10.1215	1.49679e-08	MVK, AKR1D1, ACSM5, HSD17B6, SULT1A1, HSD11B1, NSDHL, HINT2, HACL1, SULT2A2, FDFT1, SULT2A1, FDPS, HMGCS1, PTGES2, DHCR24, LSS, CYP51, PLCB3, SULT1D1, CES1D, CYP1A2, 0610007P14RIK, SLC27A2, SLC27A5	244	459	18082	4.0363	1.74824e-05
82	2.Liver	Proteome	Negative	GOTERM_BP_DIRECT	GO:0017144~drug metabolic process	7	2.83401	8.98131e-08	SULT1A1, CBR1, CYP1A2, CAD, CYP1A1, FMO1, FMO3	244	18	18082	28.8192	0.000104896
83	2.Liver	Proteome	Negative	GOTERM_BP_DIRECT	GO:0006694~steroid biosynthetic process	10	4.04858	1.34564e-07	FDPS, NSDHL, HINT2, MVK, HMGCS1, DHCR24, 0610007P14RIK, LSS, CYP51, FDFT1	244	62	18082	11.9527	0.000157159
84	2.Liver	Proteome	Negative	GOTERM_BP_DIRECT	GO:0006730~one-carbon metabolic process	8	3.23887	1.45032e-07	ALDH1L1, AHCYL2, AHCY, MTHFD1, SHMT1, MAT1A, ALDH1L2, GNMT	244	31	18082	19.1243	0.000169383
85	2.Liver	Proteome	Negative	GOTERM_BP_DIRECT	GO:0051289~protein homotetramerization	10	4.04858	6.37333e-07	ACTN2, DCXR, SHMT1, CTH, IMPDH2, ALDOC, MAT1A, SOD2, DNM1L, GNMT	244	74	18082	10.0144	0.000744128
86	2.Liver	Proteome	Negative	GOTERM_BP_DIRECT	GO:0009058~biosynthetic process	7	2.83401	9.08187e-06	ALDH1L1, KYAT3, GPT, ALDH1L2, GCAT, PBLD2, FDFT1	244	37	18082	14.0202	0.0105516
87	2.Liver	Proteome	Negative	GOTERM_BP_DIRECT	GO:0007005~mitochondrion organization	9	3.64372	1.30979e-05	CHCHD2, CLUH, OPA1, TMEM11, DNAJA3, LONP1, PHB, SOD2, DNM1L	244	81	18082	8.23406	0.015182
88	2.Liver	Proteome	Negative	GOTERM_BP_DIRECT	GO:0009636~response to toxic substance	9	3.64372	2.03968e-05	DDC, MAOB, CPS1, AIFM1, CES1D, CYP1A1, NEFL, INMT, SRSF9	244	86	18082	7.75534	0.0235422
89	2.Liver	Proteome	Negative	GOTERM_BP_DIRECT	GO:0008203~cholesterol metabolic process	9	3.64372	2.62264e-05	FDPS, SQLE, NSDHL, MVK, FECH, HMGCS1, DHCR24, CYP51, FDFT1	244	89	18082	7.49392	0.0301684
90	2.Liver	Proteome	Negative	GOTERM_BP_DIRECT	GO:0006099~tricarboxylic acid cycle	6	2.42915	3.83782e-05	MDH1, IDH2, SDHC, ACO2, SDHA, SDHB	244	29	18082	15.3324	0.0438367
91	2.Liver	Proteome	Negative	GOTERM_BP_DIRECT	GO:0019674~NAD metabolic process	4	1.61943	4.65342e-05	NADK2, MDH1, GPD1L, KMO	244	6	18082	49.4044	0.0529025
92	2.Liver	Proteome	Negative	GOTERM_BP_DIRECT	GO:0006749~glutathione metabolic process	7	2.83401	4.77472e-05	GSTA4, ETHE1, CTH, GSTT3, GSTT2, SOD2, GSTM7	244	49	18082	10.5867	0.0542434
93	2.Liver	Proteome	Negative	GOTERM_CC_DIRECT	GO:0005739~mitochondrion	99	40.081	9.74081e-41	DMGDH, MTCH2, ALDH1L1, CISD1, ACSM5, ABAT, ALDH1L2, TOMM22, CHCHD2, MPC2, FTH1, CHCHD7, LONP1, ACAD10, MCCC2, MCCC1, SDHC, HOGA1, SDHA, KMO, HDHD3, ATAD3A, SDHB, GCAT, POR, MTHFD1, ETHE1, UQCRC1, VDAC3, VDAC2, VDAC1, SLC27A2, IDI1, FECH, MAOB, SHMT1, AK3, PHB, ACAT2, TIMM50, APOO, GRPEL1, CYC1, FDPS, ADHFE1, IDH2, COQ5, QDPR, CPS1, TMEM11, KYAT3, CYP1A1, SFXN3, SFXN1, ACO2, SLC25A3, NADK2, HINT2,…	246	1721	19662	4.59777	2.36702e-38
94	2.Liver	Proteome	Negative	GOTERM_CC_DIRECT	GO:0005743~mitochondrial inner membrane	41	16.5992	2.93994e-25	MTCH2, SLC25A3, FECH, MAOB, NDUFB3, UQCR11, PHB, TOMM22, TIMM50, APOO, OPA1, AIFM1, MPC2, TIMM17B, CYC1, CYB5B, BCKDHB, MCCC1, IDH2, IMMT, TIMM23, SDHC, SDHA, KMO, SOD2, ATAD3A, SDHB, GCAT, COQ5, SLC25A15, CPS1, TMEM11, CHDH, UQCRC1, VDAC3, VDAC2, SFXN1, VDAC1, SLC25A12, SLC25A11, SLC25A13	246	387	19662	8.4677	7.14407e-23
95	2.Liver	Proteome	Negative	GOTERM_CC_DIRECT	GO:0031090~organelle membrane	25	10.1215	4.11086e-25	MGST3, CYP3A11, CYP2C39, CYP2C38, CYP2C37, CYP2D11, CYP2D10, CYP2A12, CYP2C54, CYP2C50, CYB5A, FMO1, FMO3, FMO4, CYP2C29, CYP51, CYP4F14, CYP2D26, SQLE, CYP2A5, CYP2A4, CYP3A41A, CYP1A2, CYP1A1, CYP2C40	246	94	19662	21.2571	9.98939e-23
96	2.Liver	Proteome	Negative	GOTERM_CC_DIRECT	GO:0043231~intracellular membrane-bounded organelle	48	19.4332	2.56161e-20	AHCYL2, ACSS2, MCPT4, MGST3, RDH7, CISD1, CYP3A11, HSD17B6, ATP1A1, CYP2C39, CYP2C38, CYP2C37, HSD11B1, SLC9A3R1, NSDHL, CES2C, NFS1, CYP2D11, ALDH1B1, CYP2D10, CYP2A12, CYP2C54, RUVBL1, CYP2C50, DNM1L, AASS, FDFT1, CYB5B, CYB5A, CBR1, FMO1, FMO3, FMO4, LSS, CYP2C29, CYP51, CYP4F14, CYP2D26, SQLE, POR, CYP3A41A, DNAJA3, CYP1A2, CYP1A1, CYP2C40, MCM3, SLC27A2, SLC27A5	246	751	19662	5.10851	6.22472e-18
97	2.Liver	Proteome	Negative	GOTERM_CC_DIRECT	GO:0070062~extracellular exosome	87	35.2227	6.51973e-18	ALDH1L1, MTCH2, SLC25A3, ACY1, CISD1, ABAT, GPT, ALDH1L2, ACTB, PBLD2, AQP1, TGM1, PTBP1, FTL1, PNP, ATIC, MB, FTH1, RUVBL1, PGM2, PSMD1, ACP1, HIBCH, SLC12A9, CBR1, ACTN2, DCXR, CAD, HOGA1, ATP1B1, KMO, SDHB, UPB1, ALDH1A3, MTHFD1, TCP1, VDAC3, VDAC2, ALDOC, VDAC1, UBE2V1, HPD, SLC27A2, KPNB1, ALDH9A1, PLEC, DDC, DDX5, PDXK, MVK, AHCY, MAOB, MGST3, SHMT1, AKR1D1, NDUFB3, GSTT2, ATP1A1, PHB, IQGA…	246	2674	19662	2.60046	1.58429e-15
98	2.Liver	Proteome	Negative	GOTERM_CC_DIRECT	GO:0005789~endoplasmic reticulum membrane	37	14.9798	7.42406e-13	MGST3, CYP3A11, CYP2C39, CYP2C38, CYP2C37, HSD11B1, APOO, NSDHL, CYP2D11, CYP2D10, CYP2A12, RDH11, CYP2C54, CYP2C50, FDFT1, CYB5A, NUP210, FMO1, DHCR24, FMO3, FMO4, LSS, CYP2C29, CYP51, CYP4F14, CYP2D26, SQLE, POR, CYP2A5, CYP2A4, CYP3A41A, CYP1A2, CYP1A1, CYP2C40, 0610007P14RIK, HPD, SLC27A2	246	710	19662	4.1652	1.80405e-10
99	2.Liver	Proteome	Negative	GOTERM_CC_DIRECT	GO:0043209~myelin sheath	19	7.69231	3.5337e-11	SLC25A3, MDH1, IMMT, ATP1A3, PHB, ATP1A1, SDHA, SOD2, ATP1B1, ACTB, EHD1, EHD3, TCP1, UQCRC1, NEFL, VDAC2, VDAC1, ACO2, SLC25A12	246	192	19662	7.90943	8.58688e-09
100	2.Liver	Proteome	Negative	GOTERM_CC_DIRECT	GO:0005783~endoplasmic reticulum	46	18.6235	6.12582e-10	AHCYL2, MGST3, RDH7, CYP3A11, ATP1A3, HSD17B6, ATP1A1, CYP2C39, CYP2C38, CYP2C37, HSD11B1, APOO, NSDHL, CES2C, CYP2D11, CYP2D10, CYP2A12, RDH11, CYP2C54, CYP2C50, ASL, DNM1L, FDFT1, CYB5A, NUP210, FMO1, DHCR24, FMO3, FMO4, LSS, CYP2C29, CYP51, CYP4F14, CYP2D26, SQLE, POR, EHD4, CES1D, CES1G, CYP1A2, CYP1A1, CYP2C40, 0610007P14RIK, HPD, SLC27A2, SLC27A5	246	1323	19662	2.77901	1.48857e-07
101	2.Liver	Proteome	Negative	GOTERM_CC_DIRECT	GO:0005759~mitochondrial matrix	17	6.88259	1.86302e-09	MCCC2, FDPS, MCCC1, AK3, ACSM5, ABAT, ALDH4A1, NFS1, GRPEL1, ALDH1B1, IVD, DNAJA3, ETHE1, SARDH, LONP1, AGXT, HSPA1B	246	188	19662	7.22743	4.52714e-07
102	2.Liver	Proteome	Negative	GOTERM_CC_DIRECT	GO:0005741~mitochondrial outer membrane	14	5.66802	6.49224e-08	CYB5B, MTCH2, MAOB, CISD1, KMO, TOMM22, AIFM1, OPA1, VDAC3, MFN2, VDAC2, ASL, VDAC1, DNM1L	246	153	19662	7.31357	1.5776e-05
103	2.Liver	Proteome	Negative	GOTERM_CC_DIRECT	GO:0016020~membrane	120	48.583	1.85317e-05	MTCH2, CYP3A11, CISD1, EPRS, ACTB, AQP1, TOMM22, TGM1, NSDHL, CYP2D11, CYP2D10, MPC2, LONP1, PSMD1, SLC12A9, DDX17, NUP210, SLC6A12, SDHC, SDHA, ATP1B1, KMO, ATAD3A, SDHB, CYP2D26, NUP93, POR, MTHFD1, UQCRC1, VDAC3, VDAC2, VDAC1, HPD, SLC27A2, KPNB1, SLC27A5, DDX5, FECH, MAOB, DHX9, MGST3, PHB, TIMM50, HSD11B1, SLC9A3R1, APOO, RDH11, CYC1, FDFT1, SLC10A1, DHCR24, CYP2C29, CYP51, COQ5, CYP4F14, EH…	246	6998	19662	1.37057	0.00449313
104	2.Liver	Proteome	Negative	GOTERM_CC_DIRECT	GO:0005829~cytosol	44	17.8138	1.95331e-05	PDXK, AHCYL2, AHCY, MVK, SHMT1, AKR1D1, GSTT2, SLC2A2, GSPT1, ACTB, ACAT2, SULT1A1, NFS1, PNP, AIFM1, AFMID, PSMB1, MFN2, ASL, DNM1L, CRYM, WDTC1, SULT2A1, HMGCS1, MDH1, PTGES2, CAD, IDH2, DHCR24, MAT1A, INMT, QDPR, EHD3, PLCB3, UROC1, CES1D, MTHFD1, CTH, DNAJA3, CRYL1, ACOT6, HSPA1A, GNE, ALDH9A1	246	1784	19662	1.97129	0.00473533
105	2.Liver	Proteome	Negative	GOTERM_CC_DIRECT	GO:0042645~mitochondrial nucleoid	7	2.83401	2.17274e-05	CPS1, DBT, LONP1, VDAC2, VDAC1, SOD2, ATAD3A	246	46	19662	12.1628	0.00526591
106	2.Liver	Proteome	Negative	GOTERM_MF_DIRECT	GO:0016491~oxidoreductase activity	69	27.9352	3.65531e-43	DMGDH, ALDH1L1, KDM1A, RDH7, CYP3A11, ALDH1L2, CYP2C39, CYP2C38, CYP2C37, NSDHL, CYP2D11, CYP2D10, AIFM1, FTH1, ACAD10, AASS, BCKDHA, CBR1, DCXR, BCKDHB, SDHA, KMO, SDHB, CYP2D26, ALDH1A3, POR, MTHFD1, ETHE1, IVD, CYP3A41A, CHDH, CYP2C40, L2HGDH, HPD, ALDH9A1, MAOB, AKR1D1, HSD17B6, HSD11B1, ALDH1B1, CYP2A12, RDH11, CYP2C54, CREG1, CYP2C50, CRYM, FDFT1, MDH1, ADHFE1, IDH2, FMO1, DHCR24, FMO3, FMO…	241	604	17446	8.26972	1.96656e-40
107	2.Liver	Proteome	Negative	GOTERM_MF_DIRECT	GO:0003824~catalytic activity	45	18.2186	5.63019e-24	DDC, ALDH1L1, ACSS2, SHMT1, RDH7, ACSM5, ABAT, GPT, SPATA20, EPRS, ALDH1L2, PAPSS2, PBLD2, ACAT2, PAPSS1, NFS1, PNP, ATIC, HINT2, ASL, HACL1, AASS, FDFT1, HMGCS1, MDH1, BCKDHB, CAD, MCCC1, DHCR24, HOGA1, UPB1, HAL, CPS1, MTHFD1, CTH, IMPDH2, UQCRC1, KYAT3, CYP1A1, ALDOC, AGXT, UMPS, SLC27A2, SLC27A5, GNE	241	479	17446	6.80073	3.02904e-21
108	2.Liver	Proteome	Negative	GOTERM_MF_DIRECT	GO:0070330~aromatase activity	17	6.88259	5.60577e-21	CYP3A11, CYP2C29, CYP2C39, CYP2C38, CYP2D26, CYP2C37, CYP2D11, CYP2A5, CYP2D10, CYP2A4, CYP2C54, CYP2A12, CYP3A41A, CYP1A2, CYP2C40, CYP1A1, CYP2C50	241	36	17446	34.1842	3.0159e-18
109	2.Liver	Proteome	Negative	GOTERM_MF_DIRECT	GO:0020037~heme binding	26	10.5263	1.58102e-18	FECH, CYP3A11, CYP2C39, CYP2C38, CYP2C37, CYP2D11, CYP2D10, CYP2A12, CYP2C54, MB, CYP2C50, CYC1, CYB5B, CYB5A, PTGES2, SDHC, CYP2C29, CYP51, CYP4F14, CYP2D26, CYP2A5, CYP2A4, CYP3A41A, CYP1A2, CYP1A1, CYP2C40	241	175	17446	10.7551	8.50586e-16
110	2.Liver	Proteome	Negative	GOTERM_MF_DIRECT	GO:0004497~monooxygenase activity	20	8.09717	4.39638e-16	CYP3A11, FMO1, FMO3, FMO4, KMO, CYP2C29, CYP2C39, CYP51, CYP4F14, CYP2C38, CYP2D26, CYP2C37, CYP2D11, CYP2D10, CYP2C54, CYP2A12, CYP1A2, CYP2C40, CYP1A1, CYP2C50	241	108	17446	13.4056	2.3892e-13
111	2.Liver	Proteome	Negative	GOTERM_MF_DIRECT	GO:0005506~iron ion binding	25	10.1215	1.96921e-15	FECH, CISD1, CYP3A11, CYP2C39, CYP2C38, CYP2C37, FTL1, CYP2D11, CYP2D10, CYP2A12, CYP2C54, FTH1, CYP2C50, CYP2C29, CYP51, CYP4F14, CYP2D26, CYP2A5, CYP2A4, CYP3A41A, ETHE1, CYP1A2, CYP1A1, CYP2C40, ACO2	241	212	17446	8.53656	1.07514e-12
112	2.Liver	Proteome	Negative	GOTERM_MF_DIRECT	GO:0050660~flavin adenine dinucleotide binding	16	6.47773	4.44748e-14	DMGDH, MAOB, KDM1A, FMO1, DHCR24, FMO3, SDHA, FMO4, KMO, SQLE, POR, AIFM1, IVD, CHDH, SARDH, ACAD10	241	72	17446	16.0867	2.39517e-11
113	2.Liver	Proteome	Negative	GOTERM_MF_DIRECT	GO:0008395~steroid hydroxylase activity	14	5.66802	3.06958e-13	CYP2C29, CYP2C39, CYP2C38, CYP2D26, CYP2C37, CYP2D11, CYP2A5, CYP2D10, CYP2A4, CYP2C54, CYP2A12, CYP2C40, CYP1A1, CYP2C50	241	54	17446	18.7678	1.65153e-10
114	2.Liver	Proteome	Negative	GOTERM_MF_DIRECT	GO:0016705~oxidoreductase activity, acting on paired donors, with incorporation or reduction of molecular oxygen	17	6.88259	4.0896e-13	CYP3A11, CYP2C29, CYP2C39, CYP51, CYP4F14, CYP2C38, CYP2D26, CYP2C37, CYP2D11, CYP2A5, CYP2D10, CYP2C54, CYP2A12, CYP1A2, CYP2C40, CYP1A1, CYP2C50	241	99	17446	12.4306	2.20045e-10
115	2.Liver	Proteome	Negative	GOTERM_MF_DIRECT	GO:0008392~arachidonic acid epoxygenase activity	13	5.26316	1.19121e-12	CYP2C29, CYP2C39, CYP2C38, CYP2D26, CYP2C37, CYP2D11, CYP2A5, CYP2D10, CYP2A4, CYP2C54, CYP2A12, CYP2C40, CYP2C50	241	47	17446	20.0228	6.40843e-10
116	2.Liver	Proteome	Negative	GOTERM_MF_DIRECT	GO:0030170~pyridoxal phosphate binding	10	4.04858	5.56842e-08	PDXK, NFS1, DDC, SHMT1, CTH, KYAT3, ABAT, GPT, AGXT, GCAT	241	55	17446	13.1618	2.99577e-05
117	2.Liver	Proteome	Negative	GOTERM_MF_DIRECT	GO:0016712~oxidoreductase activity, acting on paired donors, with incorporation or reduction of molecular oxygen, reduced flavin or flavoprotein as one donor, and incorporation of one atom of oxygen	9	3.64372	8.99998e-08	CYP2D11, CYP2A5, CYP2D10, CYP2A12, CYP1A2, CYP1A1, CYP3A11, CYP2C29, CYP2D26	241	42	17446	15.5122	4.84187e-05
118	2.Liver	Proteome	Negative	GOTERM_MF_DIRECT	GO:0004029~aldehyde dehydrogenase (NAD) activity	7	2.83401	1.48718e-07	ALDH4A1, ALDH1A3, ALDH1L1, ALDH1B1, ALDH8A1, ALDH1L2, ALDH9A1	241	19	17446	26.67	8.00072e-05
119	2.Liver	Proteome	Negative	GOTERM_MF_DIRECT	GO:0016829~lyase activity	13	5.26316	4.98104e-07	DDC, FECH, PTGES2, HOGA1, HAL, UROC1, CTH, KYAT3, ASL, HACL1, ALDOC, ACO2, UMPS	241	139	17446	6.77029	0.000267944
120	2.Liver	Proteome	Negative	GOTERM_MF_DIRECT	GO:0009055~electron carrier activity	9	3.64372	5.93254e-07	POR, PTGES2, IVD, UQCR11, SDHC, CYC1, SDHA, ACAD10, SDHB	241	53	17446	12.2926	0.00031912
121	2.Liver	Proteome	Negative	GOTERM_MF_DIRECT	GO:0000166~nucleotide binding	53	21.4575	1.53144e-06	ACSM5, EPRS, ACTB, PTBP1, NADK2, HINT2, OPA1, RUVBL1, LONP1, DNM1L, MCCC2, DDX17, CAD, MCCC1, MAT1A, ATAD3A, DDX19A, OBSCN, MTHFD1, TCP1, ADSSL1, MCM3, VDAC3, MYH8, VDAC2, VDAC1, SLC27A2, SLC27A5, GNE, SRSF9, PRPS1, DDX5, PDXK, MVK, ACSS2, DHX9, ATP1A3, AK3, ATP1A1, GSPT1, PAPSS2, PAPSS1, SULT1A1, MFN2, EHD1, EHD3, PSMC5, EHD4, CPS1, IMPDH2, R3HCC1, PI4KA, COQ8A	241	1936	17446	1.98175	0.000823575
122	2.Liver	Proteome	Negative	GOTERM_MF_DIRECT	GO:0005524~ATP binding	44	17.8138	3.30466e-06	PRPS1, PDXK, DDX5, ACSS2, MVK, DHX9, ATP1A3, AK3, ACSM5, ATP1A1, EPRS, ACTB, PAPSS2, PAPSS1, TTN, NADK2, RUVBL1, LONP1, MCCC2, DDX17, CAD, MCCC1, MAT1A, ATP1B1, ATAD3A, EHD1, DDX19A, EHD3, PSMC5, OBSCN, EHD4, CPS1, MTHFD1, DNAJA3, TCP1, PI4KA, MYH8, MCM3, COQ8A, SLC27A2, HSPA1B, SLC27A5, HSPA1A, GNE	241	1507	17446	2.11358	0.00177633
123	2.Liver	Proteome	Negative	GOTERM_MF_DIRECT	GO:0032451~demethylase activity	5	2.02429	4.16924e-06	KDM1A, CYP3A41A, CYP1A2, CYP1A1, CYP3A11	241	9	17446	40.2167	0.00224054
124	2.Liver	Proteome	Negative	GOTERM_MF_DIRECT	GO:0016620~oxidoreductase activity, acting on the aldehyde or oxo group of donors, NAD or NADP as acceptor	7	2.83401	4.27605e-06	ALDH4A1, ALDH1A3, ALDH1L1, ALDH1B1, ALDH8A1, ALDH1L2, ALDH9A1	241	32	17446	15.8353	0.00229787
125	2.Liver	Proteome	Negative	GOTERM_MF_DIRECT	GO:0019899~enzyme binding	19	7.69231	6.53428e-06	CYB5A, DDC, DDX5, KDM1A, CAD, TIMM23, DHCR24, PHB, SOD2, TTN, POR, CYP2A5, CYP2A4, CYP1A2, CYP1A1, GSTM7, SLC27A2, KPNB1, HSPA1A	241	384	17446	3.5818	0.00350928
126	2.Liver	Proteome	Negative	GOTERM_MF_DIRECT	GO:0034875~caffeine oxidase activity	4	1.61943	4.98732e-05	CYP1A2, CYP2C29, CYP2C39, CYP2C38	241	6	17446	48.26	0.0264756
127	2.Liver	Proteome	Negative	GOTERM_MF_DIRECT	GO:0016597~amino acid binding	6	2.42915	5.08471e-05	DDC, SHMT1, CAD, FMO3, MAT1A, AGXT	241	30	17446	14.478	0.0269856
128	2.Liver	Proteome	Negative	GOTERM_MF_DIRECT	GO:0016740~transferase activity	40	16.1943	5.39295e-05	PRPS1, PDXK, MVK, SHMT1, MGST3, GSTT2, AK3, ABAT, GPT, PAPSS2, ACAT2, PAPSS1, SULT1A1, TGM1, NADK2, NFS1, PNP, ATIC, DBT, SULT2A2, FDFT1, SULT2A1, FDPS, HMGCS1, CAD, HUWE1, MAT1A, INMT, COQ5, GNMT, SULT1D1, OBSCN, GSTA4, KYAT3, PI4KA, COQ8A, AGXT, UMPS, GSTM7, GNE	241	1472	17446	1.96712	0.028598
129	2.Liver	Proteome	Negative	KEGG_PATHWAY	mmu01100:Metabolic pathways	107	43.3198	6.39882e-40	DMGDH, AHCYL2, CYP3A11, ACSM5, ABAT, EPRS, NSDHL, PNP, MCCC2, MCCC1, SDHC, HOGA1, MAT1A, SDHA, KMO, SDHB, UPB1, MTHFD1, UQCRC1, HPD, SLC27A5, GNE, IDI1, FECH, MAOB, SHMT1, ACAT2, HSD11B1, RDH11, AFMID, ASL, CYC1, FDFT1, FDPS, IDH2, DHCR24, CYP2C29, CYP51, COQ5, CYP4F14, QDPR, SQLE, HAL, CPS1, CYP1A2, KYAT3, CYP1A1, PI4KA, CRYL1, ACO2, ACY1, GPT, CYP2C39, CYP2C38, CYP2C37, NADK2, ATIC, DBT, PGM2, …	178	1269	7691	3.64322	1.0878e-37
130	2.Liver	Proteome	Negative	KEGG_PATHWAY	mmu01130:Biosynthesis of antibiotics	35	14.17	8.63433e-20	PRPS1, IDI1, ACSS2, MVK, ACY1, SHMT1, AK3, PAPSS2, ACAT2, PAPSS1, NSDHL, ATIC, ALDH1B1, DBT, PGM2, ASL, AASS, FDFT1, BCKDHA, FDPS, HMGCS1, MDH1, BCKDHB, IDH2, SDHC, SDHA, LSS, SDHB, CYP51, SQLE, CTH, ALDOC, ACO2, AGXT, ALDH9A1	178	214	7691	7.06671	1.46784e-17
131	2.Liver	Proteome	Negative	KEGG_PATHWAY	mmu05204:Chemical carcinogenesis	22	8.90688	9.00746e-16	CBR1, MGST3, GSTT3, CYP3A11, GSTT2, CYP2C29, CYP2C39, CYP2C38, CYP2C37, SULT1A1, HSD11B1, ALDH1A3, GSTA4, CYP2C54, CYP3A41A, CYP1A2, CYP2C40, KYAT3, CYP1A1, CYP2C50, GSTM7, SULT2A1	178	92	7691	10.3323	1.5099e-13
132	2.Liver	Proteome	Negative	KEGG_PATHWAY	mmu00140:Steroid hormone biosynthesis	17	6.88259	8.97012e-11	AKR1D1, CYP3A11, HSD17B6, CYP2C29, CYP2C39, CYP2C38, CYP2D26, CYP2C37, HSD11B1, CYP2D11, CYP2D10, CYP2C54, CYP3A41A, CYP1A2, CYP2C40, CYP1A1, CYP2C50	178	87	7691	8.44292	1.52492e-08
133	2.Liver	Proteome	Negative	KEGG_PATHWAY	mmu00830:Retinol metabolism	16	6.47773	1.2862e-09	CYP3A11, HSD17B6, CYP2C29, CYP2C39, CYP2C38, CYP2C37, CYP2A5, CYP2A4, RDH11, CYP2C54, CYP2A12, CYP3A41A, CYP1A2, CYP2C40, CYP1A1, CYP2C50	178	89	7691	7.76771	2.18655e-07
134	2.Liver	Proteome	Negative	KEGG_PATHWAY	mmu00280:Valine, leucine and isoleucine degradation	12	4.8583	3.49175e-08	MCCC2, BCKDHA, ALDH1B1, HMGCS1, IVD, DBT, MCCC1, BCKDHB, ABAT, HIBCH, ACAT2, ALDH9A1	178	55	7691	9.42717	5.93596e-06
135	2.Liver	Proteome	Negative	KEGG_PATHWAY	mmu00380:Tryptophan metabolism	11	4.45344	8.01134e-08	DDC, MAOB, ALDH1B1, CYP1A2, AFMID, KYAT3, CYP1A1, KMO, ACAT2, INMT, ALDH9A1	178	47	7691	10.1125	1.36192e-05
136	2.Liver	Proteome	Negative	KEGG_PATHWAY	mmu01200:Carbon metabolism	15	6.07287	3.65915e-07	PRPS1, ACSS2, MDH1, SHMT1, IDH2, SDHC, GPT, SDHA, SDHB, ACAT2, CPS1, ALDOC, ACO2, AGXT, HIBCH	178	116	7691	5.58722	6.22036e-05
137	2.Liver	Proteome	Negative	KEGG_PATHWAY	mmu00591:Linoleic acid metabolism	10	4.04858	1.64348e-06	CYP2C37, CYP2C54, CYP3A41A, CYP1A2, CYP3A11, CYP2C40, CYP2C50, CYP2C29, CYP2C39, CYP2C38	178	50	7691	8.64157	0.000279353
138	2.Liver	Proteome	Negative	KEGG_PATHWAY	mmu00980:Metabolism of xenobiotics by cytochrome P450	11	4.45344	1.6707e-06	HSD11B1, CBR1, ALDH1A3, GSTA4, MGST3, CYP1A2, CYP1A1, GSTT3, GSTT2, GSTM7, SULT2A1	178	64	7691	7.42635	0.000283979
139	2.Liver	Proteome	Negative	KEGG_PATHWAY	mmu00982:Drug metabolism - cytochrome P450	11	4.45344	2.23629e-06	ALDH1A3, MAOB, GSTA4, MGST3, CYP1A2, GSTT3, FMO1, GSTT2, FMO3, FMO4, GSTM7	178	66	7691	7.20131	0.000380097
140	2.Liver	Proteome	Negative	KEGG_PATHWAY	mmu00260:Glycine, serine and threonine metabolism	9	3.64372	2.75393e-06	DMGDH, MAOB, CHDH, SHMT1, CTH, SARDH, AGXT, GCAT, GNMT	178	40	7691	9.72177	0.000468059
141	2.Liver	Proteome	Negative	KEGG_PATHWAY	mmu01230:Biosynthesis of amino acids	11	4.45344	8.29329e-06	PRPS1, ACY1, CPS1, SHMT1, CTH, IDH2, GPT, ALDOC, ASL, ACO2, MAT1A	178	76	7691	6.25377	0.00140887
142	2.Liver	Proteome	Negative	KEGG_PATHWAY	mmu00250:Alanine, aspartate and glutamate metabolism	8	3.23887	1.74457e-05	ALDH4A1, CPS1, CAD, ADSSL1, ABAT, GPT, ASL, AGXT	178	37	7691	9.34224	0.0029614
143	2.Liver	Proteome	Negative	KEGG_PATHWAY	mmu00630:Glyoxylate and dicarboxylate metabolism	7	2.83401	4.17454e-05	MDH1, SHMT1, AFMID, ACO2, HOGA1, AGXT, ACAT2	178	29	7691	10.4295	0.00707174
144	2.Liver	Proteome	Negative	KEGG_PATHWAY	mmu04726:Serotonergic synapse	13	5.26316	4.80562e-05	DDC, MAOB, CYP2C29, CYP2C39, CYP2C38, CYP2D26, CYP2C37, PLCB3, CYP2D11, CYP2D10, CYP2C54, CYP2C40, CYP2C50	178	132	7691	4.25532	0.00813647
145	2.Liver	Proteome	Negative	KEGG_PATHWAY	mmu00100:Steroid biosynthesis	6	2.42915	5.45946e-05	SQLE, NSDHL, DHCR24, LSS, CYP51, FDFT1	178	19	7691	13.6446	0.0092384
146	2.Liver	Proteome	Negative	KEGG_PATHWAY	mmu00340:Histidine metabolism	6	2.42915	0.000146604	ALDH1A3, HAL, MAOB, UROC1, ALDH1B1, ALDH9A1	178	23	7691	11.2716	0.0246164
147	2.Liver	Proteome	Negative	KEGG_PATHWAY	mmu00590:Arachidonic acid metabolism	10	4.04858	0.000193018	CYP2C37, CBR1, PTGES2, CYP2C54, CYP2C40, CYP2C50, CYP2C29, CYP2C39, CYP4F14, CYP2C38	178	89	7691	4.85482	0.0322836
148	2.Liver	Proteome	Negative	UP_TISSUE	Liver	143	57.8947	9.46496e-43	DMGDH, MTCH2, ALDH1L1, CYP3A11, CISD1, ACSM5, ABAT, PBLD2, AQP1, TGM1, CHCHD2, PNP, CYP2D10, MPC2, PSMD1, ACAD10, SULT2A2, SULT2A1, MCCC2, SLC6A12, HOGA1, MAT1A, SDHA, KMO, ATAD3A, SDHB, UPB1, GCAT, CYP2D26, MTHFD1, ETHE1, UQCRC1, VDAC3, VDAC2, VDAC1, UBE2V1, HPD, SLC27A2, SLC27A5, GNE, SRSF9, FECH, MAOB, SHMT1, GSTT2, AK3, IQGAP2, HSD11B1, SULT1A1, SLC9A3R1, GRPEL1, AFMID, ASL, HACL1, FDFT1, WDT…	245	4216	22371	3.0971	1.06954e-40
149	2.Liver	Proteome	Negative	UP_TISSUE	Kidney	75	30.3644	6.51689e-12	DMGDH, ACY1, CISD1, SLC2A2, ACSM5, TGM1, CES2C, CD1D1, FTL1, HINT2, MPC2, FTH1, DBT, LONP1, HIBCH, NUP210, DCXR, MCCC1, TIMM23, SDHC, HOGA1, ATP1B1, UPB1, INMT, CYP2D26, ALDH1A3, SLC25A15, PLCB3, CYP2A5, SULT1D1, CYP2A4, ETHE1, IVD, VDAC3, SLC25A11, SLC27A2, SLC25A13, PLEC, PRPS1, PDXK, AHCY, FECH, DHX9, GSTT2, UQCR11, PHB, PAPSS2, PAPSS1, SLC9A3R1, APOO, NFS1, CREG1, AFMID, MFN2, CYC1, FDFT1, CY…	245	3029	22371	2.2609	7.36409e-10
150	2.Liver	Proteome	Negative	UP_TISSUE	Hippocampus	44	17.8138	2.53209e-10	PRPS1, PDXK, MTCH2, SHMT1, NDUFB3, UQCR11, ABAT, ATP1A1, PHB, ACTB, ACAT2, TOMM22, TTN, FTL1, PNP, ATIC, AIFM1, FTH1, LONP1, CYP2C50, NEFL, CYC1, DNM1L, HIBCH, CBR1, HMGCS1, MDH1, IMMT, FMO1, SDHA, SOD2, SDHB, QDPR, MTHFD1, TCP1, UQCRC1, VDAC2, ALDOC, VDAC1, ACO2, GPD1L, SLC25A12, ALDH9A1, PLEC	245	1359	22371	2.95633	2.86126e-08
151	2.Liver	Proteome	Negative	UP_TISSUE	Bone marrow	43	17.4089	2.2396e-05	MTCH2, SLC25A3, AHCY, MVK, FECH, AK3, ATP1A1, PHB, ACTB, TOMM22, PAPSS1, PTBP1, SLC9A3R1, FTL1, PNP, ALDH1B1, MPC2, PGM2, TIMM17B, PSMD1, CYC1, ACP1, DDX17, NAPSA, DCXR, IMMT, SDHA, SOD2, ATAD3A, SDHB, IMPDH2, TCP1, UQCRC1, ADSSL1, VDAC3, VDAC2, SFXN1, VDAC1, L2HGDH, 0610007P14RIK, UBE2V1, ACO2, ALDH9A1	245	1981	22371	1.982	0.00252757
152	2.Liver	Proteome	Negative	UP_TISSUE	Heart	31	12.5506	6.28759e-05	MTCH2, FECH, UQCR11, PHB, PAPSS1, TTN, SLC9A3R1, CREG1, FTH1, CHCHD7, CYP2C50, SF3B1, FDFT1, ACTN2, BCKDHB, MCCC1, IDH2, IMMT, SDHA, SOD2, SDHB, NUP93, SLC25A15, EHD4, ADSSL1, MCM3, VDAC3, COQ8A, ACO2, KPNB1, PLEC	245	1276	22371	2.21835	0.00708002
153	2.Liver	Proteome	Positive	GOTERM_BP_DIRECT	GO:0055114~oxidation-reduction process	39	14.2857	2.98516e-13	PYCRL, GDI2, HSD17B4, TXNDC12, HSD17B12, ERO1L, LDHC, CYP2D9, LDHA, AIFM1, ME1, HAO1, NDUFV1, XDH, CBR3, HSD3B6, HSD3B5, PDHA1, HSD3B2, AKR1E1, HSD3B3, HSD3B1, TXNL1, AKR1A1, PIPOX, PGD, CYP7B1, DHRS1, AKR1C6, PRODH2, DHRS4, ALDH3A2, GLUD1, GRHPR, HADHA, BDH1, GPD1, PCYOX1, UOX	256	676	18082	4.07497	4.19746e-10
154	2.Liver	Proteome	Positive	GOTERM_BP_DIRECT	GO:0008152~metabolic process	31	11.3553	3.49938e-12	ACY3, ACAA2, PCX, DLST, ACAA1B, ACAA1A, ACACB, ACAT1, HK3, GANAB, UGP2, SCP2, MAN2A1, ISOC1, HMGCS2, HSD3B6, PDHA1, HSD3B2, PKLR, HSD3B3, PGAM1, EPHX2, HSD3B1, ALDH3A2, HADHB, GRHPR, HADHA, GPAM, CPS1, BDH1, ACO1	256	463	18082	4.72919	4.92019e-09
155	2.Liver	Proteome	Positive	GOTERM_BP_DIRECT	GO:0005975~carbohydrate metabolic process	18	6.59341	5.82044e-09	PDHA1, PKLR, GK, GBE1, TALDO1, PGD, LDHC, CS, GPI1, HK3, GALE, GANAB, LDHA, MAN2A1, GPD1, PGM3, MLEC, GAPDH	256	206	18082	6.1718	8.1835e-06
156	2.Liver	Proteome	Positive	GOTERM_BP_DIRECT	GO:0006629~lipid metabolic process	24	8.79121	1.59512e-07	RAB7, CPT1A, ACAA2, PCX, EPHX2, MTTP, HSD17B4, APOC3, APOA1, ACAA1B, ACAA1A, HSD17B12, CYP7B1, ACACB, AKR1C6, PAFAH2, HADHB, HADHA, GPAM, PSAP, HMGCS2, APOE, CRAT, PAFAH1B2	256	459	18082	3.69322	0.000224249
157	2.Liver	Proteome	Positive	GOTERM_BP_DIRECT	GO:0006635~fatty acid beta-oxidation	9	3.2967	1.60207e-07	HADHB, HADHA, CPT1A, ABCD3, ACAA2, HSD17B4, ACAA1B, ACAA1A, ACAT1	256	44	18082	14.4476	0.000225226
158	2.Liver	Proteome	Positive	GOTERM_BP_DIRECT	GO:0006694~steroid biosynthetic process	10	3.663	2.02576e-07	HSD3B6, HSD3B4, HSD3B5, HSD3B2, SCP2, HSD3B3, HSD3B1, HMGCS2, HSD17B12, AKR1C6	256	62	18082	11.3924	0.000284782
159	2.Liver	Proteome	Positive	GOTERM_BP_DIRECT	GO:0006096~glycolytic process	8	2.9304	6.01521e-07	GPI1, HK3, PKLR, PGAM1, ENO1, ENO2, ENO3, GAPDH	256	36	18082	15.6962	0.000845381
160	2.Liver	Proteome	Positive	GOTERM_BP_DIRECT	GO:0006641~triglyceride metabolic process	8	2.9304	1.06906e-06	CPT1A, GK, GPAM, APOH, MTTP, APOC1, APOC3, APOE	256	39	18082	14.4888	0.00150197
161	2.Liver	Proteome	Positive	GOTERM_BP_DIRECT	GO:0045454~cell redox homeostasis	9	3.2967	3.5344e-06	GCLC, GLRX3, AIFM1, GLRX5, TXNL1, TXNDC12, P4HB, PDIA4, ERO1L	256	65	18082	9.77993	0.00495704
162	2.Liver	Proteome	Positive	GOTERM_BP_DIRECT	GO:0006631~fatty acid metabolic process	12	4.3956	1.35952e-05	HADHB, HADHA, FABP2, CPT1A, ACAA2, FABP4, GPAM, HSD17B4, ACAA1B, ACAA1A, ACACB, CRAT	256	156	18082	5.43329	0.0189334
163	2.Liver	Proteome	Positive	GOTERM_BP_DIRECT	GO:0006888~ER to Golgi vesicle-mediated transport	9	3.2967	1.40228e-05	COPB2, VCP, SEC23A, COPA, VAPA, VAPB, ERP29, PREB, VTI1B	256	78	18082	8.14994	0.0195231
164	2.Liver	Proteome	Positive	GOTERM_BP_DIRECT	GO:0098609~cell-cell adhesion	13	4.7619	1.59794e-05	LRRC59, STAT1, ENO1, CGN, ATXN2L, LASP1, LDHA, VAPA, VAPB, PLIN3, FLNB, LRRFIP1, PLEC	256	189	18082	4.85834	0.0222167
165	2.Liver	Proteome	Positive	GOTERM_CC_DIRECT	GO:0070062~extracellular exosome	143	52.381	9.48096e-55	EIF4A1, ACAA2, RNH1, TFRC, PARK7, ENO1, ENO2, CLU, ENO3, TIAL1, C4B, PSMD7, RPS16, ALCAM, LGALS1, SCP2, RPS19, CFL1, STMN1, CAPN2, KPNA4, AKR1E1, TPM3, TALDO1, RNASE4, PGD, 4931406C07RIK, ALDH3A2, NCL, GPD1, CMPK1, ERP29, CHMP4B, KCTD12, LAP3, PFN1, COPA, FKBP2, PSMD12, VCP, CFH, TARS, CORO1B, ACAT1, LDHC, HPX, LDHA, MAN2A1, APOH, ESD, PSAP, ISOC1, SERPINH1, APOE, RSU1, HSPA5, HSPA4, ST13, EPHX2,…	265	2674	19662	3.96786	2.88221e-52
166	2.Liver	Proteome	Positive	GOTERM_CC_DIRECT	GO:0005829~cytosol	67	24.5421	1.48453e-14	RAB7, MUP20, PYCRL, PARK7, OPLAH, CLU, GPI1, HK3, LGALS1, AIFM1, SCP2, RPS19, CFL1, STMN1, ME1, CAPN2, PGM3, KPNA4, SKP1A, ANXA1, ANXA2, PGAM1, ANXA5, AKR1A1, APOA1, TALDO1, APOA4, RAP2C, ALDH3A2, PREPL, GPD1, CHMP4B, PLIN2, PFN1, GAPDH, PAFAH1B2, COPB2, VCP, CORO1B, HSPD1, LDHA, G3BP2, APOE, GC, XDH, RAB6B, CBR3, VTI1B, GSDMD, GSN, PKLR, GK, HSPA4, ST13, STAT1, EPHX2, SGTA, APOC3, HPRT, ATOX1, F…	265	1784	19662	2.78652	4.5226e-12
167	2.Liver	Proteome	Positive	GOTERM_CC_DIRECT	GO:0005743~mitochondrial inner membrane	28	10.2564	2.83547e-12	ABCD3, ACAA2, PCX, HSPD1, ACAT1, AIFM1, PMPCA, HMGCS2, NDUFV1, HSD3B6, HSD3B4, CPT1A, HSD3B5, HSD3B2, HSD3B3, GOT2, DHRS1, PRODH2, COX6B1, ALDH3A2, HADHB, GLUD1, HADHA, GPAM, CPS1, BDH1, OCIAD2, CRAT	265	387	19662	5.3682	8.61995e-10
168	2.Liver	Proteome	Positive	GOTERM_CC_DIRECT	GO:0005739~mitochondrion	61	22.3443	4.04898e-12	ACAA2, ABCD3, TFRC, PARK7, CLU, HK3, AIFM1, SCP2, ME1, PMPCA, HMGCS2, CTSD, CPT1A, GLRX5, PRODH2, COX6B1, ALDH3A2, HADHB, HADHA, BDH1, GPD1, LAP3, GAPDH, GRN, PCX, MRPS34, HSD17B4, DLST, IBA57, ACAA1B, ACAA1A, ACACB, HSPD1, ACAT1, LDHA, PSAP, NDUFV1, HSD3B6, HSD3B4, HSD3B5, PDHA1, HSD3B2, GK, HSPA5, HSD3B3, AGXT2, HSD3B1, TXNL1, GOT2, DHRS1, DHRS4, CS, GLUD1, MAVS, GPAM, CPS1, ACO1, TPP1, OCIAD2,…	265	1721	19662	2.62985	1.23089e-09
169	2.Liver	Proteome	Positive	GOTERM_CC_DIRECT	GO:0005615~extracellular space	55	20.1465	2.05676e-11	LGALS3BP, PIGR, MUP20, TFRC, COL14A1, PZP, ENO1, ENO2, CLU, ENO3, CES3A, GPI1, SERPINA1A, C4B, SERPINA1B, LGALS1, CFL1, PMPCA, 1300017J02RIK, CTSD, FGB, ANXA1, ANXA2, ANXA5, AKR1A1, APOA1, APOA4, F2, DDB1, CES3B, CSTB, COPA, GRN, CFH, HSPD1, HPX, SH3BGRL, TTR, MAN2A1, APOH, PSAP, SERPINH1, APOE, GC, XDH, CBR3, LGI1, GSDMD, GSN, RDX, FN1, APOC3, PPT1, NUCB1, TPT1	265	1504	19662	2.71329	6.25253e-09
170	2.Liver	Proteome	Positive	GOTERM_CC_DIRECT	GO:0005777~peroxisome	17	6.22711	2.47183e-11	ABCD3, PEX11A, EPHX2, HSD17B4, PIPOX, ACAA1B, ACAA1A, DHRS4, NUDT7, MAVS, SCP2, ISOC1, LONP2, HAO1, XDH, CRAT, UOX	265	131	19662	9.62852	7.51437e-09
171	2.Liver	Proteome	Positive	GOTERM_CC_DIRECT	GO:0005737~cytoplasm	142	52.0147	2.99973e-11	CARS, EIF4A1, RNH1, TFRC, PARK7, ENO1, ENO2, CLU, ENO3, TIAL1, HYKK, LGALS1, SCP2, RPS19, CFL1, STMN1, CAPN2, LONP2, KPNA4, AKR1E1, TPM3, TALDO1, PGD, ATXN2L, PREPL, NCL, GPD1, CMPK1, CHMP4B, TLN2, LAP3, PFN1, COPB2, COPA, PSMD12, VCP, CFH, TARS, CORO1B, LDHC, LDHA, RAB11FIP1, APOH, ESD, ISOC1, G3BP2, SERPINH1, APOE, SEC31A, VTI1B, GSDMD, RBPMS, HSPA5, HSPA4, ST13, EPHX2, RDX, HPRT, PAFAH2, GLUD1…	265	6631	19662	1.58888	9.11916e-09
172	2.Liver	Proteome	Positive	GOTERM_CC_DIRECT	GO:0072562~blood microparticle	17	6.22711	3.12189e-11	FGB, LGALS3BP, ITIH4, GSN, CFH, TFRC, FN1, APOA1, APOA4, ITIH1, F2, CLU, C4B, HPX, APOE, GC, PFN1	265	133	19662	9.48373	9.49055e-09
173	2.Liver	Proteome	Positive	GOTERM_CC_DIRECT	GO:0031012~extracellular matrix	22	8.05861	5.40659e-10	LGALS3BP, EIF4A1, HSPA5, COL14A1, FN1, F2, CLU, HSPD1, HADHA, GANAB, LGALS1, RPS16, RPS19, APOH, LMNA, CFL1, FLNB, APOE, P4HB, GAPDH, CTSD, PLEC	265	294	19662	5.5521	1.6436e-07
174	2.Liver	Proteome	Positive	GOTERM_CC_DIRECT	GO:0043209~myelin sheath	18	6.59341	9.74555e-10	VCP, PDHA1, GSN, HSPA5, WDR1, PGAM1, RDX, GDI2, GOT2, DLST, ENO1, ENO2, HSPD1, GPI1, TUBA1A, PMP2, GAPDH, SPTAN1	265	192	19662	6.9559	2.96265e-07
175	2.Liver	Proteome	Positive	GOTERM_CC_DIRECT	GO:0005913~cell-cell adherens junction	22	8.05861	1.99858e-09	LRRC59, ANXA1, HSPA5, ANXA2, STAT1, RDX, PARK7, ENO1, CGN, CORO1B, ATXN2L, LASP1, LDHA, VAPA, VAPB, PLIN3, CHMP4B, FLNB, LRRFIP1, PFN1, SPTAN1, PLEC	265	316	19662	5.16556	6.07567e-07
176	2.Liver	Proteome	Positive	GOTERM_CC_DIRECT	GO:0034361~very-low-density lipoprotein particle	8	2.9304	3.19057e-09	APOH, APOC1, APOC4, APOC3, APOA1, APOA4, APOE, PCYOX1	265	19	19662	31.2405	9.69933e-07
177	2.Liver	Proteome	Positive	GOTERM_CC_DIRECT	GO:0043231~intracellular membrane-bounded organelle	32	11.7216	2.96036e-08	LRRC59, RAB7, VCP, GRN, ABCD3, TFRC, HSD17B4, DLST, ACAA1A, CLU, HSPD1, CYP2D9, RAB11FIP1, SCP2, SPTAN1, SEC31A, VTI1B, HSD3B4, CPT1A, HSD3B5, PDHA1, VBP1, TALDO1, PGD, CYP7B1, DHRS4, ALDH3A2, PLIN4, PLIN3, PLIN2, ACO1, GAPDH	265	751	19662	3.16149	8.99945e-06
178	2.Liver	Proteome	Positive	GOTERM_CC_DIRECT	GO:0005783~endoplasmic reticulum	44	16.1172	5.89165e-08	LRRC59, FKBP2, VCP, SEC23A, MTTP, TXNDC12, HSD17B12, PARK7, CLU, ERO1L, CES3A, SERPINA1A, SERPINA1B, GANAB, CYP2D9, SCP2, CAPN2, SERPINH1, MLEC, APOE, UGGT1, SEC31A, HSD3B6, HSD3B5, HSD3B2, HSPA5, HSD3B3, HSD3B1, ANXA5, CYP7B1, DHRS1, PDIA4, TAPBP, CES3B, ALDH3A2, HADHB, VAPA, VAPB, APOC1, ERP29, PREB, ACO1, P4HB, CRAT	265	1323	19662	2.4676	1.79104e-05
179	2.Liver	Proteome	Positive	GOTERM_CC_DIRECT	GO:0005925~focal adhesion	22	8.05861	8.14436e-08	GSN, ANXA1, HSPA5, ANXA5, RDX, GDI2, CORO1B, LASP1, ALCAM, RPS16, RPS19, CFL1, CAPN2, RPLP2, RPL38, FLNB, RSU1, LAP3, TLN2, P4HB, PFN1, PLEC	265	391	19662	4.17472	2.47586e-05
180	2.Liver	Proteome	Positive	GOTERM_CC_DIRECT	GO:0005759~mitochondrial matrix	14	5.12821	1.63549e-06	PDHA1, ACAA2, PCX, GLRX5, GOT2, IBA57, PARK7, ACAT1, HSPD1, CS, GLUD1, BDH1, PMPCA, HMGCS2	265	188	19662	5.52525	0.000497065
181	2.Liver	Proteome	Positive	GOTERM_CC_DIRECT	GO:0030117~membrane coat	7	2.5641	2.50784e-06	COPB2, COPA, AP2S1, CHMP4B, COPG2, AP2B1, AP3B2	265	30	19662	17.3125	0.000762092
182	2.Liver	Proteome	Positive	GOTERM_CC_DIRECT	GO:0034364~high-density lipoprotein particle	6	2.1978	7.17038e-06	APOH, APOC1, APOC4, APOA1, APOA4, APOE	265	21	19662	21.1989	0.00217743
183	2.Liver	Proteome	Positive	GOTERM_CC_DIRECT	GO:0042627~chylomicron	5	1.8315	2.065e-05	APOH, APOC3, APOA1, APOA4, APOE	265	13	19662	28.537	0.006258
184	2.Liver	Proteome	Positive	GOTERM_CC_DIRECT	GO:0005811~lipid particle	8	2.9304	2.87935e-05	RAB7, VCP, ANXA2, HSPA4, PLIN4, PLIN3, PLIN2, GAPDH	265	66	19662	8.99348	0.00871515
185	2.Liver	Proteome	Positive	GOTERM_CC_DIRECT	GO:0005576~extracellular region	45	16.4835	3.78027e-05	LGALS3BP, PIGR, ITIH4, MUP20, GRN, COPA, CFH, TFRC, COL14A1, PZP, ITIH1, CLU, SERPINA1A, GPI1, C4B, SERPINA1B, HPX, LGALS1, TTR, APOH, PSAP, CFL1, 1300017J02RIK, APOE, GC, XDH, CTSD, LGI1, GSDMD, FGB, GSN, ANXA1, ANXA2, HSPA5, APOC4, FN1, APOA1, APOC3, APOA4, RNASE4, F2, APOC1, PPT1, NUCB1, PFN1	265	1753	19662	1.90464	0.0114265
186	2.Liver	Proteome	Positive	GOTERM_CC_DIRECT	GO:0042470~melanosome	9	3.2967	6.5392e-05	GANAB, ANXA2, TFRC, HSPA5, ERP29, TPP1, P4HB, CTSD, PDIA4	265	101	19662	6.61154	0.0196835
187	2.Liver	Proteome	Positive	GOTERM_CC_DIRECT	GO:0005782~peroxisomal matrix	5	1.8315	6.58857e-05	FABP1, ABCD3, SCP2, LONP2, HSPD1	265	17	19662	21.8224	0.0198307
188	2.Liver	Proteome	Positive	GOTERM_CC_DIRECT	GO:0005788~endoplasmic reticulum lumen	9	3.2967	8.0513e-05	CES3B, HSPA5, ERP29, SERPINH1, TXNDC12, P4HB, UGGT1, PDIA4, CES3A	265	104	19662	6.42083	0.0241798
189	2.Liver	Proteome	Positive	GOTERM_MF_DIRECT	GO:0003824~catalytic activity	34	12.4542	1.76082e-13	ACAA2, PCX, GBE1, QPRT, ACAA1B, ACAA1A, OPLAH, ACACB, ACAT1, LDHC, HK3, GANAB, LDHA, SCP2, MAN2A1, ISOC1, HAO1, PMPCA, HMGCS2, XDH, HSD3B6, HSD3B2, PKLR, HSD3B3, AGXT2, PGAM1, EPHX2, HSD3B1, GOT2, TALDO1, HADHB, HADHA, CPS1, BDH1	259	479	17446	4.78123	9.71969e-11
190	2.Liver	Proteome	Positive	GOTERM_MF_DIRECT	GO:0016491~oxidoreductase activity	38	13.9194	1.9637e-13	PYCRL, GDI2, HSD17B4, TXNDC12, HSD17B12, ERO1L, LDHC, CYP2D9, LDHA, AIFM1, ME1, HAO1, NDUFV1, XDH, CBR3, HSD3B6, HSD3B5, PDHA1, HSD3B2, AKR1E1, HSD3B3, HSD3B1, AKR1A1, PIPOX, PGD, CYP7B1, DHRS1, AKR1C6, PRODH2, DHRS4, ALDH3A2, GLUD1, GRHPR, HADHA, BDH1, GPD1, PCYOX1, UOX	259	604	17446	4.23782	1.08412e-10
191	2.Liver	Proteome	Positive	GOTERM_MF_DIRECT	GO:0098641~cadherin binding involved in cell-cell adhesion	22	8.05861	1.13694e-09	LRRC59, ANXA1, HSPA5, ANXA2, STAT1, RDX, PARK7, ENO1, CGN, CORO1B, ATXN2L, LASP1, LDHA, VAPA, VAPB, PLIN3, CHMP4B, FLNB, LRRFIP1, PFN1, SPTAN1, PLEC	259	279	17446	5.31147	6.27591e-07
192	2.Liver	Proteome	Positive	GOTERM_MF_DIRECT	GO:0003988~acetyl-CoA C-acyltransferase activity	6	2.1978	4.03465e-09	HADHB, HADHA, ACAA2, SCP2, ACAA1B, ACAA1A	259	6	17446	67.3591	2.22712e-06
193	2.Liver	Proteome	Positive	GOTERM_MF_DIRECT	GO:0044822~poly(A) RNA binding	44	16.1172	6.09153e-09	CSTB, EIF4A1, LRRC59, VCP, GRN, ACAA2, TFRC, COL14A1, GDI2, SRRT, IBA57, ENO1, HSPD1, TIAL1, PURA, GANAB, LGALS1, RPS16, RPS19, G3BP2, SERPINH1, UBAP2L, FLNB, TNPO1, GLRX3, RBPMS, ANXA2, YTHDF3, RDX, GOT2, PDIA4, ATXN2L, HADHB, CS, FUBP1, NCL, UBE2N, P4HB, KCTD12, PFN1, FKBP3, TPT1, RPS23, PLEC	259	1113	17446	2.66289	3.36252e-06
194	2.Liver	Proteome	Positive	GOTERM_MF_DIRECT	GO:0016853~isomerase activity	14	5.12821	1.53133e-08	HSD3B6, HSD3B4, FKBP2, HSD3B2, HSD3B3, PGAM1, HSD3B1, HSD17B4, PDIA4, GPI1, GALE, PGM3, P4HB, FKBP3	259	115	17446	8.20024	8.4529e-06
195	2.Liver	Proteome	Positive	GOTERM_MF_DIRECT	GO:0016616~oxidoreductase activity, acting on the CH-OH group of donors, NAD or NADP as acceptor	9	3.2967	1.58829e-08	LDHC, HSD3B6, GRHPR, LDHA, HSD3B5, HSD3B2, HSD3B3, HSD3B1, GPD1	259	32	17446	18.9447	8.76734e-06
196	2.Liver	Proteome	Positive	GOTERM_MF_DIRECT	GO:0042803~protein homodimerization activity	34	12.4542	9.23447e-08	CARS, ABCD3, TFRC, PEX11A, QPRT, HSD17B4, PARK7, ENO1, ENO2, ENO3, ACAT1, LGALS1, PSMD7, RPS19, SCP2, LRRFIP1, APOE, XDH, ANXA1, RBPMS, STAT1, EPHX2, SGTA, RDX, GOT2, APOA4, HPRT, GRHPR, GALE, VAPB, GPD1, ERP29, CHMP4B, PAFAH1B2	259	798	17446	2.86994	5.0973e-05
197	2.Liver	Proteome	Positive	GOTERM_MF_DIRECT	GO:0003854~3-beta-hydroxy-delta5-steroid dehydrogenase activity	6	2.1978	4.95133e-07	HSD3B6, HSD3B4, HSD3B5, HSD3B2, HSD3B3, HSD3B1	259	12	17446	33.6795	0.000273276
198	2.Liver	Proteome	Positive	GOTERM_MF_DIRECT	GO:0051287~NAD binding	9	3.2967	1.37054e-06	HADHB, HADHA, GRHPR, HSD3B4, HSD3B5, GPD1, ME1, GAPDH, NDUFV1	259	55	17446	11.0224	0.000756255
199	2.Liver	Proteome	Positive	GOTERM_MF_DIRECT	GO:0016747~transferase activity, transferring acyl groups other than amino-acyl groups	6	2.1978	1.84112e-05	HADHB, ACAA2, SCP2, ACAA1B, ACAA1A, ACAT1	259	23	17446	17.5719	0.0101116
200	2.Liver	Proteome	Positive	GOTERM_MF_DIRECT	GO:0042802~identical protein binding	25	9.15751	2.00768e-05	VCP, ACY3, PYCRL, TFRC, PARK7, CORO1B, SERPINA1A, SERPINA1B, UGP2, TTR, APOH, FLNB, APOE, CPT1A, ST13, AGXT2, STAT1, GOT2, FN1, APOA1, HPRT, NCL, CHMP4B, DYNLRB1, GAPDH	259	625	17446	2.69436	0.0110213
201	2.Liver	Proteome	Positive	GOTERM_MF_DIRECT	GO:0004769~steroid delta-isomerase activity	4	1.4652	3.12757e-05	HSD3B6, HSD3B2, HSD3B3, HSD3B1	259	5	17446	53.8873	0.0171163
202	2.Liver	Proteome	Positive	GOTERM_MF_DIRECT	GO:0005543~phospholipid binding	9	3.2967	4.75411e-05	FABP1, ANXA1, BDH1, CPS1, APOH, GOT2, APOC3, APOA1, APOE	259	88	17446	6.889	0.025902
203	2.Liver	Proteome	Positive	GOTERM_MF_DIRECT	GO:0004866~endopeptidase inhibitor activity	6	2.1978	8.44035e-05	SERPINA1A, C4B, USP14, CSTB, SERPINA1B, PZP	259	31	17446	13.0372	0.0455239
204	2.Liver	Proteome	Positive	KEGG_PATHWAY	mmu01130:Biosynthesis of antibiotics	32	11.7216	4.68622e-18	ACAA2, PYCRL, DLST, ACAA1B, ACAA1A, ENO1, ENO2, ENO3, ACAT1, LDHC, GPI1, HK3, LDHA, UGP2, PGM3, HAO1, HMGCS2, PDHA1, PKLR, PGAM1, GOT2, AKR1A1, TALDO1, PGD, PAFAH2, ALDH3A2, HADHB, CS, HADHA, ACO1, GAPDH, PCYOX1	163	214	7691	7.05556	8.0603e-16
205	2.Liver	Proteome	Positive	KEGG_PATHWAY	mmu01200:Carbon metabolism	23	8.42491	1.58605e-15	PDHA1, PCX, PKLR, PGAM1, GOT2, TALDO1, DLST, ENO1, PGD, ENO2, ENO3, ACAT1, CS, GPI1, HK3, GLUD1, HADHA, CPS1, ESD, ME1, ACO1, HAO1, GAPDH	163	116	7691	9.35546	2.67342e-13
206	2.Liver	Proteome	Positive	KEGG_PATHWAY	mmu01100:Metabolic pathways	70	25.641	1.85465e-15	ACAA2, PYCRL, GBE1, QPRT, ENO1, ENO2, ENO3, GPI1, HK3, HYKK, SCP2, ME1, HMGCS2, PGAM1, AKR1A1, TALDO1, PIPOX, PGD, PRODH2, COX6B1, ALDH3A2, HADHB, HADHA, BDH1, CMPK1, LAP3, GAPDH, PAFAH1B2, PCX, HSD17B4, DLST, ACAA1B, HSD17B12, ACAA1A, ACACB, ACAT1, LDHC, GANAB, LDHA, UGP2, MAN2A1, HAO1, XDH, NDUFV1, CBR3, HSD3B6, HSD3B4, HSD3B5, PDHA1, HSD3B2, PKLR, GK, AGXT2, TPK1, EPHX2, HSD3B1, GOT2, HPRT, PA…	163	1269	7691	2.60275	3.24629e-13
207	2.Liver	Proteome	Positive	KEGG_PATHWAY	mmu00010:Glycolysis / Gluconeogenesis	13	4.7619	9.33819e-09	PDHA1, PKLR, PGAM1, AKR1A1, ENO1, ENO2, ENO3, LDHC, ALDH3A2, GPI1, HK3, LDHA, GAPDH	163	66	7691	9.29383	1.60617e-06
208	2.Liver	Proteome	Positive	KEGG_PATHWAY	mmu01230:Biosynthesis of amino acids	13	4.7619	4.90547e-08	PCX, PKLR, PYCRL, PGAM1, GOT2, TALDO1, ENO1, ENO2, ENO3, CS, CPS1, ACO1, GAPDH	163	76	7691	8.07096	8.43737e-06
209	2.Liver	Proteome	Positive	KEGG_PATHWAY	mmu00620:Pyruvate metabolism	10	3.663	8.05989e-08	LDHC, ALDH3A2, GRHPR, LDHA, PDHA1, PKLR, PCX, ME1, ACACB, ACAT1	163	39	7691	12.0985	1.38629e-05
210	2.Liver	Proteome	Positive	KEGG_PATHWAY	mmu04146:Peroxisome	13	4.7619	1.34832e-07	ABCD3, PEX11A, EPHX2, HSD17B4, PIPOX, ACAA1B, ACAA1A, DHRS4, NUDT7, SCP2, HAO1, XDH, CRAT	163	83	7691	7.39027	2.31908e-05
211	2.Liver	Proteome	Positive	KEGG_PATHWAY	mmu01212:Fatty acid metabolism	9	3.2967	9.60946e-06	HADHB, HADHA, CPT1A, ACAA2, PPT1, ACAA1B, HSD17B12, ACAA1A, ACAT1	163	51	7691	8.3266	0.00165147
212	2.Liver	Proteome	Positive	KEGG_PATHWAY	mmu03320:PPAR signaling pathway	10	3.663	4.21446e-05	FABP1, FABP2, CPT1A, FABP4, GK, SCP2, APOC3, APOA1, ACAA1B, ACAA1A	163	80	7691	5.89801	0.00722281
213	2.Liver	Proteome	Positive	KEGG_PATHWAY	mmu00071:Fatty acid degradation	8	2.9304	6.59561e-05	ALDH3A2, HADHB, HADHA, CPT1A, ACAA2, ACAA1B, ACAA1A, ACAT1	163	49	7691	7.70352	0.0112807
214	2.Liver	Proteome	Positive	KEGG_PATHWAY	mmu00280:Valine, leucine and isoleucine degradation	8	2.9304	0.000140152	ALDH3A2, HADHB, HADHA, ACAA2, ACAA1B, HMGCS2, ACAA1A, ACAT1	163	55	7691	6.86313	0.0238196
215	2.Liver	Proteome	Positive	KEGG_PATHWAY	mmu04141:Protein processing in endoplasmic reticulum	13	4.7619	0.000209563	SEC23A, VCP, HSPA5, PDIA4, ERO1L, GANAB, ERP29, CAPN2, PREB, P4HB, SKP1A, UGGT1, SEC31A	163	168	7691	3.65115	0.0354066
216	2.Liver	Proteome	Positive	UP_TISSUE	Liver	148	54.2125	8.47429e-41	CARS, ACAA2, CLU, ENO3, C4B, CYP2D9, RPS16, LGALS1, SCP2, CFL1, LONP2, RPL38, UBAP2L, CPT1A, AKR1E1, TPM3, PIPOX, RNASE4, ATXN2L, ALDH3A2, NCL, GPD1, KCTD12, COPA, FKBP2, VCP, CFH, PEX11A, MTTP, ACAT1, HPX, LDHA, RAB11FIP1, MAN2A1, APOH, PSAP, G3BP2, HAO1, APOE, NDUFV1, SEC31A, GSDMD, PDHA1, HSPA5, HSPA4, AGXT2, EPHX2, GOT2, RDX, FN1, CGN, PAFAH2, CS, GLUD1, GRHPR, GCLC, MAVS, CPS1, NACA, PPT1, C…	266	4216	22371	2.95233	1.11861e-38
217	2.Liver	Proteome	Positive	UP_TISSUE	Bone marrow	72	26.3736	6.29825e-18	CARS, LGALS3BP, EIF4A1, RAB7, ABCD3, WDR1, GDI2, ENO1, GPI1, HK3, RPS16, CAPN2, PGM3, LONP2, PMPCA, RPL38, SKP1A, CTSD, CPT1A, ANXA1, WARS, ANXA2, VBP1, TPM3, PGAM1, ANXA5, AKR1A1, PGD, PDIA4, TAPBP, DDB1, ALDH3A2, HADHB, PLIN2, PREB, LAP3, PFN1, FKBP3, METTL26, PAFAH1B2, LRRC59, CSTB, COPB2, PSMD12, VCP, GRN, MVP, DLST, TARS, HSD17B12, CORO1B, SH3BGRL, GANAB, LDHA, RAB11FIP1, LMNA, PSAP, ISOC1, …	266	1981	22371	3.05669	8.31369e-16
218	2.Liver	Proteome	Positive	UP_TISSUE	Hippocampus	58	21.2454	2.57745e-17	WDR1, GDI2, PARK7, ENO1, ENO2, CLU, GPI1, TUBA1C, PSMD7, TUBA1A, AIFM1, RPS19, CFL1, STMN1, ME1, SH3BGRL2, PMPCA, SPTAN1, WARS, GLRX5, PGAM1, ANXA5, AKR1A1, TALDO1, HADHB, TUBB2B, NCL, GPD1, CMPK1, ERP29, PFN1, GAPDH, PAFAH1B2, PLEC, VCP, GRN, DLST, CORO1B, HSPD1, ACAT1, PURA, SH3BGRL, LDHA, NDUFV1, GM6560, PDHA1, YTHDF3, HSPA5, HSPA4, RDX, GOT2, HPRT, CS, GLUD1, GRHPR, UBE2N, TPT1, RPS23	266	1359	22371	3.58932	3.40223e-15
219	2.Liver	Proteome	Positive	UP_TISSUE	Kidney	82	30.0366	4.19151e-13	EIF4A1, ACY3, RNH1, ABCD3, PYCRL, TXNDC12, PARK7, ENO1, PEPD, OPLAH, ENO3, SERPINA1A, CYP2D9, RPS16, TUBA1A, SCP2, RPS19, STMN1, ME1, PGM3, PMPCA, RPL38, SKP1A, GLRX3, AKR1E1, VBP1, TPM3, PGAM1, PIPOX, APOA4, PGD, 4931406C07RIK, COX6B1, ATXN2L, BDH1, GPD1, CMPK1, ERP29, TLN2, LAP3, GAPDH, METTL26, PLEC, LRRC59, CSTB, FKBP2, VCP, GRN, MRPS34, ZFP706, NEDD8, HSPD1, LDHA, TTR, LMNA, PSAP, MLEC, ASCC…	266	3029	22371	2.27677	5.53224e-11
220	2.Liver	Proteome	Positive	UP_TISSUE	Plasma	15	5.49451	2.04418e-11	CFH, PZP, FN1, ITIH1, F2, CLU, C4B, SERPINA1A, HPX, SERPINA1B, TTR, APOH, NPTN, GC, PCYOX1	266	103	22371	12.2478	2.69831e-09
221	2.Liver	Proteome	Positive	UP_TISSUE	Amnion	23	8.42491	9.266e-09	FGB, GSN, ACAA2, TPM3, HSD3B1, RDX, TXNL1, HSD17B4, TARS, APOA4, PEPD, GDAP2, PDIA4, DDB1, SERPINA1A, TUBA1C, LASP1, LMNA, LONP2, LAP3, P4HB, PCYOX1, FARSB	266	427	22371	4.53006	1.22311e-06
222	2.Liver	Proteome	Positive	UP_TISSUE	Heart	36	13.1868	3.27881e-06	EIF4A1, LRRC59, ACAA2, COL14A1, HSD17B4, DLST, TARS, OPLAH, ENO2, CLU, ACACB, HSPD1, GPI1, LDHA, TUBA1A, AP2S1, PGM3, SERPINH1, RPL38, PMPCA, RSU1, CTSD, HSD3B6, CPT1A, PDHA1, GSN, RBPMS, ANXA2, TPM3, EPHX2, AKR1A1, HPRT, NACA, NCL, FKBP3, PLEC	266	1276	22371	2.37277	0.00043271
223	2.Liver	Proteome	Positive	UP_TISSUE	Thymus	61	22.3443	7.29057e-05	LGALS3BP, TFRC, WDR1, GDI2, PARK7, ENO1, GPI1, ALCAM, PSMD7, RPS16, TUBA1A, CFL1, STMN1, PGM3, NPTN, LONP2, RPLP2, UBAP2L, LRRFIP1, SKP1A, ANXA2, TPM3, 4931406C07RIK, TAPBP, RAP2C, ALDH3A2, HADHB, BDH1, NCL, MCM2, COPB2, PSMD12, H2-Q8, MVP, HSD17B4, HSD17B12, HSPD1, ACAT1, UGP2, PSAP, G3BP2, GSN, GK, HSPA4, STAT1, SGTA, RDX, HPRT, ATOX1, GCLC, NUDT7, MAVS, FABP4, VAPB, FUBP1, PPT1, TPP2, COPG2, T…	266	3108	22371	1.65064	0.00957775
224	3.Adipose	Proteome	Negative	GOTERM_BP_DIRECT	GO:0055114~oxidation-reduction process	89	24.5179	8.99617e-49	PECR, PHF2, ALDH1L1, ACADVL, HIBADH, NDUFA10, ETFA, ALDH2, AIFM1, ME1, ME3, HADH, ACAD11, ACADS, ACAD10, HTATIP2, ACAD8, BCKDHA, CBR2, CBR1, MECR, BCKDHB, ACAD9, SDHA, PGD, SDHB, POR, ALDH5A1, ACOX1, ZADH2, EHHADH, IVD, GPD2, CHDH, DPYD, GPD1, UQCRC1, NDUFS3, NDUFS2, CYP2E1, UQCRC2, L2HGDH, DLD, PAOX, GCDH, NDUFB7, MAOB, UQCRB, MGST1, SDR39U1, HSD17B12, PDHB, UQCR10, HSD17B10, UQCRH, PRDX3, ALDH3…	346	676	18082	6.8804	1.09663e-45
225	3.Adipose	Proteome	Negative	GOTERM_BP_DIRECT	GO:0008152~metabolic process	69	19.0083	9.69151e-41	SLC27A1, ALDH1L1, ACADVL, ACSM3, ISOC2A, ECI1, ECI2, ACSM5, PYGL, AACS, GYS1, ALDH2, SCP2, AUH, DLAT, ACAD11, ACADS, ACAD10, PRKG1, PSPH, ACAD8, BCKDHA, PDHX, ACSL1, BCKDHB, ACAD9, ACSL6, HDHD3, MUT, COASY, ACLY, ALDH5A1, ACOX1, EHHADH, IVD, SUCLG2, SUCLG1, TKT, BCAT2, PFKFB1, GCDH, ACSS3, ECHS1, ACSS2, ACAA1B, PDHB, PLA2G6, AGPAT2, ACACB, ACACA, ACAT2, ALDH3B2, UGP2, ISOC1, FAHD1, PDHA1, EPHX2, …	346	463	18082	7.78822	1.18139e-37
226	3.Adipose	Proteome	Negative	GOTERM_BP_DIRECT	GO:0006631~fatty acid metabolic process	31	8.53994	9.36781e-22	PECR, SLC27A1, ACADVL, ECHS1, ACSM3, ECI1, ACAA1B, ACSM5, ACACB, ACACA, AACS, CPT2, UCP3, MLYCD, HADH, DECR2, ACADS, CBR4, DECR1, MECR, ACSL1, ACSL6, ELOVL6, ACADSB, MCAT, GPAM, ACOX1, FASN, EHHADH, NDUFAB1, CRAT	346	156	18082	10.385	1.14194e-18
227	3.Adipose	Proteome	Negative	GOTERM_BP_DIRECT	GO:0006629~lipid metabolic process	47	12.9477	1.67084e-20	PECR, SLC27A1, ACADVL, ECHS1, ACSM3, ECI1, ATP5A1, ACAA1B, ACSM5, HSD17B12, PLA2G6, ACACB, AGPAT2, ACACA, AACS, SMPD3, ATP5B, HINT2, CPT2, HACL1, KDSR, MLYCD, HADH, DECR2, PCK1, ACADS, CBR4, DECR1, MECR, ACSL1, EPHX2, ACSL6, DDHD2, ELOVL6, ACADSB, MCAT, BSCL2, ACLY, GPAM, ACOX1, FASN, EHHADH, NDUFAB1, THRSP, LPIN1, PLCB1, CRAT	346	459	18082	5.35125	2.03675e-17
228	3.Adipose	Proteome	Negative	GOTERM_BP_DIRECT	GO:0033539~fatty acid beta-oxidation using acyl-CoA dehydrogenase	11	3.0303	4.45465e-13	ACAD8, GCDH, ACADVL, ACOX1, IVD, ACAD9, ETFA, ACAD11, ACAD10, ACADS, ACADSB	346	19	18082	30.2559	5.42969e-10
229	3.Adipose	Proteome	Negative	GOTERM_BP_DIRECT	GO:0006635~fatty acid beta-oxidation	14	3.85675	1.08058e-12	ACADVL, ABCD2, ABCD3, ECHS1, ECI1, ECI2, ACAA1B, ACAT2, AUH, ACOX1, EHHADH, HADH, HIBCH, DECR1	346	44	18082	16.6282	1.31723e-09
230	3.Adipose	Proteome	Negative	GOTERM_BP_DIRECT	GO:0006099~tricarboxylic acid cycle	12	3.30579	2.64979e-12	CS, PDHA1, MDH1, MDH2, SUCLG2, SUCLG1, ACO1, ACO2, PDHB, DLAT, SDHA, SDHB	346	29	18082	21.6249	3.23007e-09
231	3.Adipose	Proteome	Negative	GOTERM_BP_DIRECT	GO:0006633~fatty acid biosynthetic process	16	4.40771	7.86587e-12	PECR, ABCD3, MECR, ACSM3, ELOVL6, ACSM5, HSD17B12, ACACB, MCAT, ACACA, ACLY, FASN, NDUFAB1, PCCB, MLYCD, CBR4	346	74	18082	11.2995	9.58843e-09
232	3.Adipose	Proteome	Negative	GOTERM_BP_DIRECT	GO:0009083~branched-chain amino acid catabolic process	8	2.20386	3.01915e-11	ACAD8, BCKDHA, BCKDK, AUH, HIBADH, BCKDHB, HIBCH, BCAT2	346	9	18082	46.4534	3.68033e-08
233	3.Adipose	Proteome	Negative	GOTERM_BP_DIRECT	GO:0055088~lipid homeostasis	12	3.30579	1.97192e-10	ACAD8, GCDH, ACADVL, ACOX1, IVD, ACAD9, ETFA, ACAD11, ACAD10, ACADS, ACADSB, ACACA	346	41	18082	15.2956	2.40377e-07
234	3.Adipose	Proteome	Negative	GOTERM_BP_DIRECT	GO:0006122~mitochondrial electron transport, ubiquinol to cytochrome c	8	2.20386	1.34729e-09	UQCRB, UQCRQ, UQCRC1, CYCS, UQCR10, UQCRC2, CYC1, UQCRH	346	13	18082	32.1601	1.64235e-06
235	3.Adipose	Proteome	Negative	GOTERM_BP_DIRECT	GO:0005975~carbohydrate metabolic process	21	5.78512	2.83914e-09	PDHA1, MDH1, MDH2, GBE1, PHKB, PDHB, PYGL, PGD, PHKA2, CS, GALE, LDHA, AKT2, SHPK, GPD1, PDK3, DLAT, B4GALT7, PDK2, PGM1, PDK1	346	206	18082	5.32749	3.4609e-06
236	3.Adipose	Proteome	Negative	GOTERM_BP_DIRECT	GO:0046034~ATP metabolic process	10	2.75482	4.90282e-08	ATP5B, ATP5A1, AK2, ATP5J, ATP5C1, ATP5H, ATP5O, ATP5L, ATP5J2, MYH7	346	40	18082	13.065	5.97635e-05
237	3.Adipose	Proteome	Negative	GOTERM_BP_DIRECT	GO:0006637~acyl-CoA metabolic process	9	2.47934	8.71208e-08	GCDH, ACSM3, SCP2, GPAM, EHHADH, ACOT2, ACOT1, ACSM5, ACADSB	346	31	18082	15.1723	0.000106195
238	3.Adipose	Proteome	Negative	GOTERM_BP_DIRECT	GO:0061732~mitochondrial acetyl-CoA biosynthetic process from pyruvate	6	1.65289	1.31242e-07	PDHX, PDHA1, MPC2, PDHB, DLAT, DLD	346	8	18082	39.1951	0.000159972
239	3.Adipose	Proteome	Negative	GOTERM_BP_DIRECT	GO:0006754~ATP biosynthetic process	7	1.92837	3.54444e-06	ATP5S, ATP5B, ATP5A1, ATP5C1, ATP5O, ATP5L, ATP5J2	346	23	18082	15.9053	0.00431136
240	3.Adipose	Proteome	Negative	GOTERM_BP_DIRECT	GO:0015986~ATP synthesis coupled proton transport	7	1.92837	3.54444e-06	ATP5B, ATP5A1, ATP5J, ATP5C1, ATP5H, ATP5O, ATP5L	346	23	18082	15.9053	0.00431136
241	3.Adipose	Proteome	Negative	GOTERM_BP_DIRECT	GO:0006749~glutathione metabolic process	9	2.47934	3.69259e-06	GSTZ1, GSTK1, ALDH5A1, GSTT3, MGST1, GSTT2, SOD2, OPLAH, GSTM5	346	49	18082	9.5988	0.00449116
242	3.Adipose	Proteome	Negative	GOTERM_BP_DIRECT	GO:0006744~ubiquinone biosynthetic process	6	1.65289	4.26853e-06	COQ3, COQ8A, COQ9, COQ7, COQ10B, COQ5	346	14	18082	22.3972	0.00518984
243	3.Adipose	Proteome	Negative	GOTERM_BP_DIRECT	GO:0006084~acetyl-CoA metabolic process	5	1.37741	4.35638e-06	CS, ACLY, FASN, ACACB, ACACA	346	7	18082	37.3287	0.00529636
244	3.Adipose	Proteome	Negative	GOTERM_BP_DIRECT	GO:0006006~glucose metabolic process	10	2.75482	5.52449e-06	ALDH5A1, PDHA1, AKT2, PDK3, PDHB, DLAT, PCK1, PGM1, PDK2, PDK1	346	68	18082	7.68531	0.00671174
245	3.Adipose	Proteome	Negative	GOTERM_BP_DIRECT	GO:0051289~protein homotetramerization	10	2.75482	1.12068e-05	ALDH5A1, ALDOC, PCBD2, SOD2, ACACB, ACADS, HSD17B10, ACACA, CBR4, DECR1	346	74	18082	7.06218	0.0135683
246	3.Adipose	Proteome	Negative	GOTERM_BP_DIRECT	GO:0015992~proton transport	9	2.47934	1.35191e-05	ATP5S, ATP5B, ATP5A1, ATP5J, ATP5C1, ATP5H, ATP5O, ATP5L, ATP5J2	346	58	18082	8.10933	0.0163448
247	3.Adipose	Proteome	Negative	GOTERM_BP_DIRECT	GO:0022904~respiratory electron transport chain	6	1.65289	2.29178e-05	ALDH5A1, NDUFA5, SOD2, SDHA, SDHB, COQ7	346	19	18082	16.5032	0.0275505
248	3.Adipose	Proteome	Negative	GOTERM_BP_DIRECT	GO:0006105~succinate metabolic process	5	1.37741	2.49755e-05	ALDH5A1, SUCLG2, SUCLG1, SDHA, SDHB	346	10	18082	26.1301	0.0299867
249	3.Adipose	Proteome	Negative	GOTERM_BP_DIRECT	GO:0006574~valine catabolic process	4	1.10193	2.71555e-05	ACAD8, ALDH6A1, HIBADH, HIBCH	346	4	18082	52.2601	0.0325611
250	3.Adipose	Proteome	Negative	GOTERM_BP_DIRECT	GO:0006552~leucine catabolic process	4	1.10193	2.71555e-05	MCCC2, AUH, IVD, MCCC1	346	4	18082	52.2601	0.0325611
251	3.Adipose	Proteome	Negative	GOTERM_BP_DIRECT	GO:0006810~transport	60	16.5289	3.55821e-05	SLC25A1, SLC27A1, MTCH2, ABCD2, ABCD3, NDUFA10, ATP5C1, ETFA, SLC2A4, SCP2, CPT2, AKT2, MPC2, CHP1, SCARA5, TIMM22, SDHA, SDHB, ATP5J2, UQCRC1, NDUFS3, NDUFS2, SLC25A51, SLC25A10, UQCRC2, SLC25A4, ATP5S, NDUFB7, UQCRB, TIMM9, ATP5A1, ATP5J, ITPR3, UQCR10, ATP5H, ATP5O, UQCRH, ATP5L, TIMM50, SELENBP1, ATP5B, UCP3, CYC1, CNNM2, SLC25A23, SLC25A22, RHBG, MPDU1, VPS16, NDUFA8, NDUFA5, NDUFA4, NDUFA2,…	346	1822	18082	1.72097	0.0424481
252	3.Adipose	Proteome	Negative	GOTERM_CC_DIRECT	GO:0005739~mitochondrion	220	60.6061	6.41117e-141	CLPB, ACSM3, ISOC2A, ECI1, ECI2, CISD1, ATP5C1, ACSM5, CISD3, LACTB, SCP2, BSG, PDK3, MLYCD, ACAD11, ACAD10, GLUL, PDK2, PDK1, MCCC2, PDHX, GSTK1, MECR, ACSL1, MCCC1, ACSL6, BCS1L, HDHD3, CLPX, POR, CLPP, LGALS12, ACOT2, UQCRC1, ACOT1, SUCLG2, SUCLG1, CYP2E1, UQCRC2, LIPT2, ATP5S, GCDH, MAOB, MGST1, ATP5J, MRPL15, ATP5H, PLA2G6, ATP5O, ATP5L, PRDX3, ATP5B, APOO, LDHA, RHOT1, GRPEL1, DECR1, APOOL,…	358	1721	19662	7.0208	1.55791e-138
253	3.Adipose	Proteome	Negative	GOTERM_CC_DIRECT	GO:0005743~mitochondrial inner membrane	83	22.865	3.41472e-64	SLC25A1, SLC27A1, ACADVL, MTCH2, NDUFA13, ABCD3, ECI1, ATP5C1, CHCHD3, AIFM1, CPT2, CHCHD6, MPC2, PMPCA, HADH, GSTK1, BCKDHB, MCCC1, USMG5, TIMM22, SDHA, BCS1L, COQ10B, SDHB, TIMM8A1, CLPX, ATP5J2, TST, GPD2, CHDH, UQCRC1, PPIF, NDUFS3, NDUFS2, SLC25A51, SUCLG1, SLC25A10, UQCRC2, SLC25A4, ATP5S, GCDH, NDUFB7, MAOB, FECH, UQCRB, TIMM9, ATP5A1, MGST1, AK2, ATP5J, UQCR10, ATP5H, ATP5O, HSD17B10, UQC…	358	387	19662	11.7791	8.29776e-62
254	3.Adipose	Proteome	Negative	GOTERM_CC_DIRECT	GO:0005759~mitochondrial matrix	44	12.1212	5.46824e-35	GCDH, ECHS1, ACSM3, ECI1, NDUFA10, ACSM5, PDHB, ALDH2, PITRM1, GRPEL1, PDK3, IARS2, ME3, PMPCA, MLYCD, HADH, ACADS, CBR4, MCCC2, CBR2, PDHX, TSFM, GSTK1, PDHA1, MDH2, GLRX5, MCCC1, ACADSB, MUT, CLPX, COASY, ALDH4A1, CS, TMLHE, PCCA, TST, CLPP, IVD, PCCB, ACOT2, PPIF, SUCLG1, DLD, DAP3	358	188	19662	12.854	1.32878e-32
255	3.Adipose	Proteome	Negative	GOTERM_CC_DIRECT	GO:0005777~peroxisome	28	7.7135	4.72584e-21	PECR, IDI1, ABCD2, ABCD3, PEX11A, ECI2, ACAA1B, SCP2, ISOC1, LONP2, HACL1, MLYCD, DECR2, ACAD11, GSTK1, ACSL1, EPHX2, ACSL6, NUDT7, TMEM135, PEX3, ACOX1, ZADH2, EHHADH, SERHL, TKT, CRAT, PAOX	358	131	19662	11.739	1.14838e-18
256	3.Adipose	Proteome	Negative	GOTERM_CC_DIRECT	GO:0070469~respiratory chain	17	4.6832	4.04425e-15	NDUFA8, NDUFB7, NDUFA5, UQCRB, NDUFA4, NDUFA2, NDUFA10, UQCR10, UQCRH, UQCRQ, NDUFAB1, UQCRC1, NDUFS3, CYCS, NDUFS2, CYC1, UQCRC2	358	58	19662	16.0978	9.71223e-13
257	3.Adipose	Proteome	Negative	GOTERM_CC_DIRECT	GO:0043209~myelin sheath	24	6.61157	8.88566e-13	PDHA1, MDH1, MDH2, NDUFA10, ATP5A1, ATP5C1, ITPR3, ATP5H, SDHA, SOD2, ATP5O, PRDX3, ATP5B, UQCRC1, NDUFS3, CYCS, ACO2, DLAT, UQCRC2, PLCB1, TKT, DLD, GLUL, SLC25A4	358	192	19662	6.86522	2.15908e-10
258	3.Adipose	Proteome	Negative	GOTERM_CC_DIRECT	GO:0005753~mitochondrial proton-transporting ATP synthase complex	9	2.47934	4.0799e-10	ATP5B, ATP5A1, ATP5J, USMG5, ATP5C1, ATP5H, ATP5O, ATP5L, ATP5J2	358	18	19662	27.4609	9.91415e-08
259	3.Adipose	Proteome	Negative	GOTERM_CC_DIRECT	GO:0045254~pyruvate dehydrogenase complex	7	1.92837	9.33243e-10	PDHX, PDHA1, PDHB, DLAT, DLD, PDK2, PDK1	358	8	19662	48.0566	2.26778e-07
260	3.Adipose	Proteome	Negative	GOTERM_CC_DIRECT	GO:0070062~extracellular exosome	90	24.7934	5.47142e-09	SLC25A1, CPNE8, ALDH1L1, MTCH2, NDUFA13, GBE1, ECI1, CISD1, MRGPRF, ATP5C1, ETFA, PYGL, SLC2A4, COMT, ANTXR1, CHCHD3, ALDH2, SCP2, BSG, CHP1, GLUL, HIBCH, PGM1, GSTK1, CBR1, VPS13C, LANCL1, USMG5, PGD, UPK3B, SDHB, COASY, ATP5J2, ACLY, BCAM, TST, PPA1, GPD1, ACOT2, SUCLG1, ALDOC, UQCRC2, PLCB1, TKT, LYPLAL1, CFD, GPM6A, ECHS1, MAOB, ATP5A1, AK2, GSTT2, PDHB, RETN, UQCR10, ATP5H, ATP5O, BPHL, ACAC…	358	2674	19662	1.84853	1.32955e-06
261	3.Adipose	Proteome	Negative	GOTERM_CC_DIRECT	GO:0005750~mitochondrial respiratory chain complex III	7	1.92837	6.78685e-09	UQCRB, UQCRQ, UQCRC1, UQCR10, UQCRC2, CYC1, UQCRH	358	10	19662	38.4453	1.6492e-06
262	3.Adipose	Proteome	Negative	GOTERM_CC_DIRECT	GO:0005747~mitochondrial respiratory chain complex I	10	2.75482	1.43841e-07	NDUFA8, NDUFA13, NDUFB7, NDUFA5, NDUFA4, NDUFA2, NDUFA10, NDUFAB1, NDUFS3, NDUFS2	358	47	19662	11.6855	3.49528e-05
263	3.Adipose	Proteome	Negative	GOTERM_CC_DIRECT	GO:0005778~peroxisomal membrane	10	2.75482	4.25026e-07	PECR, ABCD2, ABCD3, ACSL1, ACOX1, PEX3, PEX11A, ACSL6, MGST1, DECR2	358	53	19662	10.3626	0.000103276
264	3.Adipose	Proteome	Negative	GOTERM_CC_DIRECT	GO:0005741~mitochondrial outer membrane	15	4.13223	8.05583e-07	MTCH2, MAOB, ACSL1, VPS13C, ACSL6, MGST1, CISD1, RMDN3, RHOT1, GPAM, AIFM1, RPS6KB1, MFN2, LPIN1, SLC25A4	358	153	19662	5.38449	0.000195738
265	3.Adipose	Proteome	Negative	GOTERM_CC_DIRECT	GO:0005829~cytosol	60	16.5289	4.55482e-06	SLC2A4, COMT, OPLAH, AACS, PTMS, AIFM1, SCP2, AKT2, ME1, CHP1, MLYCD, PRKG1, PGM1, MEN1, MECR, VPS13C, PPP2R5A, CASK, WIPI1, EML1, MUP2, ACLY, PPM1A, PCP4, IRF3, PEX3, EHHADH, DPYD, GPD1, ACOT1, PLCB1, LYPLAL1, AK2, GSTT2, PLA2G6, ACACA, ACAT2, PRDX3, SELENBP1, LDHA, MFN2, IARS2, PCK1, CBR3, MPST, FAHD1, MDH1, EPHX2, DDHD2, ASNS, GFER, GSTZ1, RPS6KB1, CES1F, UBA3, ECHDC1, CYCS, ACO1, THRSP, DFNA5	358	1784	19662	1.84715	0.00110621
266	3.Adipose	Proteome	Negative	GOTERM_CC_DIRECT	GO:0005782~peroxisomal matrix	6	1.65289	9.92139e-06	ABCD3, SCP2, ECI2, LONP2, MLYCD, PAOX	358	17	19662	19.3842	0.00240801
267	3.Adipose	Proteome	Negative	GOTERM_CC_DIRECT	GO:0016020~membrane	167	46.0055	1.23189e-05	SLC27A1, MTCH2, ECI2, MRGPRF, CISD1, ATP5C1, KLHDC7A, COMT, ANTXR1, TMEM143, LY6C1, CHCHD3, SCP2, CHCHD6, MPC2, AKT2, BSG, LONP2, CHP1, PMPCA, GSTK1, DGAT1, PAQR4, SCARA5, ACSL1, ACSL6, CASK, BCS1L, SDHA, PHKA2, SDHB, ATP5J2, BSCL2, ACLY, POR, TMEM135, BCAM, GPD2, CD109, UQCRC1, SLC25A51, CYP2E1, UQCRC2, ATP5S, GPM6A, FECH, LMAN2L, MAOB, UQCRB, PEX11A, MGST1, ATP5J, ITPR3, ATP5H, PLA2G6, ATP5O, A…	358	6998	19662	1.31065	0.00298903
268	3.Adipose	Proteome	Negative	GOTERM_CC_DIRECT	GO:0031966~mitochondrial membrane	11	3.0303	1.52446e-05	ATP5B, NDUFA13, GPAM, IVD, UCP3, NDUFAF4, NDUFA2, NDUFS3, SLC25A10, ACAD11, ACADS	358	101	19662	5.98158	0.00369762
269	3.Adipose	Proteome	Negative	GOTERM_CC_DIRECT	GO:0000276~mitochondrial proton-transporting ATP synthase complex, coupling factor F(o)	5	1.37741	4.71416e-05	ATP5J, ATP5H, ATP5O, ATP5L, ATP5J2	358	12	19662	22.8841	0.0113903
270	3.Adipose	Proteome	Negative	GOTERM_CC_DIRECT	GO:0045263~proton-transporting ATP synthase complex, coupling factor F(o)	5	1.37741	4.71416e-05	ATP5S, ATP5J, ATP5H, ATP5L, ATP5J2	358	12	19662	22.8841	0.0113903
271	3.Adipose	Proteome	Negative	GOTERM_CC_DIRECT	GO:0043231~intracellular membrane-bounded organelle	31	8.53994	4.89518e-05	PECR, SLC27A1, CALCOCO1, ABCD2, ABCD3, ACSS2, ECI2, CISD1, MGST1, SLC2A4, CISD3, FLRT2, SCP2, PODXL, AKT2, GLUL, GSTK1, CBR1, PDHA1, DGAT1, ACSL1, ACSL6, FMO1, PGD, POR, PEX3, ACOX1, CYP2S1, ACO1, CYP2E1, TKT	358	751	19662	2.26708	0.0118251
272	3.Adipose	Proteome	Negative	GOTERM_CC_DIRECT	GO:0061617~MICOS complex	4	1.10193	0.000113988	APOO, CHCHD3, APOOL, CHCHD6	358	6	19662	36.6145	0.0273205
273	3.Adipose	Proteome	Negative	GOTERM_MF_DIRECT	GO:0003824~catalytic activity	69	19.0083	9.19523e-40	SLC27A1, ALDH1L1, ACSM3, ISOC2A, GBE1, ECI1, ECI2, ACSM5, PYGL, CSAD, OPLAH, CLYBL, AACS, GYS1, HINT2, SCP2, AUH, PMPCA, GLUL, PRKG1, APOBEC2, ACSL1, GPT2, BCKDHB, LANCL1, MCCC1, ACSL6, PHKA2, MUT, COASY, ACLY, PPM1A, PCCA, EHHADH, DPYD, UQCRC1, SUCLG2, SUCLG1, ALDOC, UQCRC2, TKT, MOCS1, BCAT2, PFKFB1, ACSS3, ECHS1, ACSS2, SDR39U1, ACAA1B, PDHB, ACACB, ACACA, ACAT2, LDHA, PITRM1, ISOC1, HACL1, FA…	335	479	17446	7.50179	5.47116e-37
274	3.Adipose	Proteome	Negative	GOTERM_MF_DIRECT	GO:0016491~oxidoreductase activity	73	20.1102	5.60113e-37	PECR, PHF2, ALDH1L1, ACADVL, HIBADH, ETFA, ALDH2, AIFM1, ME1, ME3, HADH, ACAD11, ACADS, ACAD10, HTATIP2, ACAD8, BCKDHA, CBR2, CBR1, MECR, BCKDHB, ACAD9, SDHA, PGD, SDHB, POR, ALDH5A1, ACOX1, ZADH2, EHHADH, IVD, GPD2, CHDH, DPYD, GPD1, NDUFS3, NDUFS2, CYP2E1, L2HGDH, DLD, PAOX, GCDH, MAOB, SDR39U1, HSD17B12, PDHB, HSD17B10, PRDX3, ALDH3B2, LDHA, DHRS7B, KDSR, DECR2, CBR4, DECR1, CBR3, PDHA1, MDH1,…	335	604	17446	6.29415	3.33267e-34
275	3.Adipose	Proteome	Negative	GOTERM_MF_DIRECT	GO:0050660~flavin adenine dinucleotide binding	20	5.50964	6.12539e-17	ACAD8, GCDH, ACADVL, MAOB, TXNRD2, ACAD9, FMO1, ETFA, SDHA, ACADSB, GFER, POR, AIFM1, ACOX1, IVD, CHDH, ACAD11, DLD, ACAD10, ACADS	335	72	17446	14.466	6.60583e-14
276	3.Adipose	Proteome	Negative	GOTERM_MF_DIRECT	GO:0009055~electron carrier activity	17	4.6832	1.81977e-15	ACAD8, GCDH, ACADVL, GLRX5, ACAD9, ETFA, SDHA, SDHB, ACADSB, POR, ACOX1, IVD, CYCS, CYC1, ACAD11, ACAD10, ACADS	335	53	17446	16.7041	1.05693e-12
277	3.Adipose	Proteome	Negative	GOTERM_MF_DIRECT	GO:0003995~acyl-CoA dehydrogenase activity	11	3.0303	9.99386e-14	ACAD8, GCDH, ACADVL, ACOX1, IVD, ACAD9, ETFA, ACAD11, ACAD10, ACADS, ACADSB	335	17	17446	33.6973	5.94524e-11
278	3.Adipose	Proteome	Negative	GOTERM_MF_DIRECT	GO:0000062~fatty-acyl-CoA binding	13	3.58127	1.11987e-12	ACAD8, GCDH, ACADVL, ECI2, ACAD9, ETFA, ACADSB, SCP2, ACOX1, IVD, ACAD11, ACAD10, ACADS	335	35	17446	19.3431	6.6633e-10
279	3.Adipose	Proteome	Negative	GOTERM_MF_DIRECT	GO:0016627~oxidoreductase activity, acting on the CH-CH group of donors	12	3.30579	1.72659e-12	ACAD8, GCDH, ACADVL, ACOX1, IVD, DPYD, ACAD9, SDHA, ACAD11, ACAD10, ACADS, ACADSB	335	28	17446	22.319	1.02734e-09
280	3.Adipose	Proteome	Negative	GOTERM_MF_DIRECT	GO:0052890~oxidoreductase activity, acting on the CH-CH group of donors, with a flavin as acceptor	10	2.75482	3.15614e-12	ACAD8, GCDH, ACADVL, ACOX1, IVD, ACAD9, ETFA, ACAD11, ACAD10, ACADSB	335	16	17446	32.5485	1.8779e-09
281	3.Adipose	Proteome	Negative	GOTERM_MF_DIRECT	GO:0016829~lyase activity	18	4.95868	1.37398e-09	ECHS1, FAHD1, FECH, CSAD, AUH, EHHADH, FASN, KYAT3, ECHDC1, ACO1, HACL1, ALDOC, ACO2, MLYCD, PCBD2, PCK1, MOCS1, GLUL	335	139	17446	6.74386	8.1752e-07
282	3.Adipose	Proteome	Negative	GOTERM_MF_DIRECT	GO:0008137~NADH dehydrogenase (ubiquinone) activity	9	2.47934	2.48931e-07	NDUFA8, NDUFA13, NDUFB7, NDUFA5, NDUFA4, NDUFA2, NDUFA10, NDUFS3, NDUFS2	335	35	17446	13.3914	0.000148103
283	3.Adipose	Proteome	Negative	GOTERM_MF_DIRECT	GO:0051287~NAD binding	10	2.75482	9.08879e-07	ALDH5A1, MDH1, HIBADH, GPD1, ME1, NDUFS2, ME3, HSD17B10, DLD, HTATIP2	335	55	17446	9.46866	0.000540637
284	3.Adipose	Proteome	Negative	GOTERM_MF_DIRECT	GO:0034604~pyruvate dehydrogenase (NAD+) activity	5	1.37741	1.92031e-06	PDHX, PDHA1, PDHB, DLAT, DLD	335	6	17446	43.398	0.00114193
285	3.Adipose	Proteome	Negative	GOTERM_MF_DIRECT	GO:0051536~iron-sulfur cluster binding	10	2.75482	3.38416e-06	FECH, GLRX5, DPYD, CISD1, NDUFS2, ACO1, ACO2, SDHB, MOCS1, CISD3	335	64	17446	8.13713	0.00201155
286	3.Adipose	Proteome	Negative	GOTERM_MF_DIRECT	GO:0046933~proton-transporting ATP synthase activity, rotational mechanism	6	1.65289	4.33587e-06	ATP5B, ATP5A1, ATP5C1, ATP5H, ATP5O, ATP5L	335	14	17446	22.319	0.00257652
287	3.Adipose	Proteome	Negative	GOTERM_MF_DIRECT	GO:0016740~transferase activity	54	14.876	5.49524e-06	GBE1, PYGL, COMT, CLYBL, GYS1, HYKK, SCP2, CPT2, AKT2, PDK3, DLAT, XXYLT1, PRKG1, MAP3K4, PDK2, PDK1, GSTK1, DGAT1, GPT2, CASK, ELOVL6, COASY, ACLY, TST, SHPK, TKT, B4GALT7, BCAT2, LIPT2, PFKFB1, NAA20, MGST1, AK2, GSTT2, ACAA1B, AGPAT2, ACAT2, UGP2, MPST, DOLK, MCAT, COQ5, BCKDK, GSTZ1, CS, COQ3, SEPSECS, GPAM, RPS6KB1, FASN, KYAT3, COQ8A, CRAT, GSTM5	335	1472	17446	1.91046	0.00326434
288	3.Adipose	Proteome	Negative	GOTERM_MF_DIRECT	GO:0004029~aldehyde dehydrogenase (NAD) activity	6	1.65289	2.32739e-05	ALDH4A1, ALDH3B2, ALDH1L1, ALDH6A1, ALDH5A1, ALDH2	335	19	17446	16.4456	0.0137527
289	3.Adipose	Proteome	Negative	GOTERM_MF_DIRECT	GO:0016874~ligase activity	21	5.78512	2.37829e-05	MCCC2, LIPT2, ACSS3, SLC27A1, ACSS2, ACSM3, ACSL1, MCCC1, ACSL6, ASNS, ACSM5, ACACB, AACS, ACACA, PCCA, PCCB, UBA3, SUCLG2, SUCLG1, IARS2, GLUL	335	362	17446	3.02108	0.0140513
290	3.Adipose	Proteome	Negative	GOTERM_MF_DIRECT	GO:0016620~oxidoreductase activity, acting on the aldehyde or oxo group of donors, NAD or NADP as acceptor	7	1.92837	2.802e-05	ALDH4A1, ALDH3B2, ALDH1L1, ALDH6A1, ALDH5A1, ALDH2, HTATIP2	335	32	17446	11.392	0.0165339
291	3.Adipose	Proteome	Negative	GOTERM_MF_DIRECT	GO:0030145~manganese ion binding	8	2.20386	2.88315e-05	PPM1A, NUDT7, ME1, SOD2, XXYLT1, PCK1, GLUL, B4GALT7	335	47	17446	8.86427	0.0170087
292	3.Adipose	Proteome	Negative	GOTERM_MF_DIRECT	GO:0016887~ATPase activity	15	4.13223	3.24759e-05	ABCD2, ABCD3, CLPB, ATP5A1, ATP5C1, ATP5J, ATP5H, ATP5O, CLPX, ATP5L, ATP5J2, VWA8, ATP5B, ABCB10, MYH7	335	200	17446	3.90582	0.019138
293	3.Adipose	Proteome	Negative	GOTERM_MF_DIRECT	GO:0016651~oxidoreductase activity, acting on NAD(P)H	5	1.37741	5.78429e-05	NDUFA5, AIFM1, NDUFS3, NDUFS2, ECSIT	335	12	17446	21.699	0.033832
294	3.Adipose	Proteome	Negative	GOTERM_MF_DIRECT	GO:0042803~protein homodimerization activity	33	9.09091	6.63797e-05	SLC27A1, ABCD2, ABCD3, MAOB, PEX11A, TIMM9, MGST1, PYGL, GRPEL1, SCP2, PSPH, PRKG1, PDK2, PDK1, CD209D, TXNRD2, EPHX2, ACSL6, ASNS, COQ9, GSTZ1, GALE, ABCB10, IRF3, FASN, DPYD, GPD1, KYAT3, THRSP, PLCB1, TKT, GSTM5, MYH7	335	798	17446	2.15359	0.0387274
295	3.Adipose	Proteome	Negative	GOTERM_MF_DIRECT	GO:0004075~biotin carboxylase activity	4	1.10193	6.75882e-05	PCCA, MCCC1, ACACB, ACACA	335	5	17446	41.6621	0.0394184
296	3.Adipose	Proteome	Negative	KEGG_PATHWAY	mmu01100:Metabolic pathways	138	38.0165	7.9217e-58	NDUFA13, ACSM3, NDUFA10, ATP5C1, ACSM5, COMT, HYKK, SCP2, MLYCD, HADH, GLUL, PSPH, MCCC2, PDHX, MECR, DGAT1, ACSL1, GPT2, MCCC1, ACSL6, SDHA, PGD, SDHB, ATP5J2, ACLY, UQCRC1, ACOT2, ACOT1, SUCLG2, SUCLG1, CYP2E1, UQCRC2, LIPT2, IDI1, GCDH, FECH, MAOB, UQCRB, AK2, ATP5J, ATP5H, PLA2G6, ATP5O, ACACB, UQCRH, ACAT2, ACACA, ATP5L, ALDH3B2, ATP5B, LDHA, KDSR, CYC1, PCK1, MPST, PDHA1, EPHX2, ASNS, DOLK,…	212	1269	7691	3.94516	1.61603e-55
297	3.Adipose	Proteome	Negative	KEGG_PATHWAY	mmu00280:Valine, leucine and isoleucine degradation	26	7.16253	3.16462e-25	ECHS1, HIBADH, ACAA1B, HSD17B10, AACS, ACAT2, MCEE, ALDH2, AUH, HADH, ACADS, HIBCH, ACAD8, BCKDHA, MCCC2, BCKDHB, MCCC1, ACADSB, MUT, ALDH6A1, PCCA, EHHADH, IVD, PCCB, DLD, BCAT2	212	55	7691	17.1497	6.45583e-23
298	3.Adipose	Proteome	Negative	KEGG_PATHWAY	mmu01200:Carbon metabolism	31	8.53994	1.14261e-21	ACSS2, ECHS1, PDHB, ACAT2, MCEE, ME1, ME3, DLAT, ACADS, PSPH, HIBCH, PDHA1, MDH1, MDH2, GPT2, SDHA, PGD, SDHB, MUT, CS, ALDH6A1, PCCA, EHHADH, PCCB, SUCLG2, SUCLG1, ALDOC, ACO1, ACO2, TKT, DLD	212	116	7691	9.69506	2.33092e-19
299	3.Adipose	Proteome	Negative	KEGG_PATHWAY	mmu00640:Propanoate metabolism	18	4.95868	9.68595e-21	ACSS3, ACSS2, ECHS1, ACACB, MUT, ACACA, ACAT2, ALDH6A1, LDHA, MCEE, PCCA, EHHADH, PCCB, ECHDC1, SUCLG2, SUCLG1, MLYCD, HIBCH	212	27	7691	24.1855	1.97593e-18
300	3.Adipose	Proteome	Negative	KEGG_PATHWAY	mmu01130:Biosynthesis of antibiotics	38	10.4683	4.56604e-20	IDI1, GCDH, ACSS2, ECHS1, AK2, ACAA1B, PDHB, HSD17B10, ACAT2, LDHA, UGP2, ALDH2, DLAT, HADH, PCK1, PSPH, PGM1, BCKDHA, PDHA1, MDH1, MDH2, BCKDHB, SDHA, PGD, SDHB, CS, ACLY, PCCA, EHHADH, PCCB, SUCLG2, SUCLG1, ALDOC, ACO1, ACO2, TKT, DLD, BCAT2	212	214	7691	6.44194	9.31471e-18
301	3.Adipose	Proteome	Negative	KEGG_PATHWAY	mmu00190:Oxidative phosphorylation	28	7.7135	3.62189e-16	NDUFA13, NDUFB7, UQCRB, NDUFA10, ATP5A1, ATP5C1, ATP5J, UQCR10, ATP5H, ATP5O, UQCRH, ATP5L, ATP5B, CYC1, NDUFA8, NDUFA5, NDUFA4, NDUFA2, SDHA, SDHB, ATP5J2, UQCRQ, PPA1, NDUFAB1, UQCRC1, NDUFS3, NDUFS2, UQCRC2	212	139	7691	7.30786	6.79456e-14
302	3.Adipose	Proteome	Negative	KEGG_PATHWAY	mmu01212:Fatty acid metabolism	19	5.23416	4.50594e-16	PECR, ACADVL, MECR, ECHS1, ACSL1, ACSL6, ELOVL6, ACAA1B, HSD17B12, ACADSB, MCAT, ACACA, ACAT2, CPT2, ACOX1, EHHADH, FASN, HADH, ACADS	212	51	7691	13.5154	9.05942e-14
303	3.Adipose	Proteome	Negative	KEGG_PATHWAY	mmu05012:Parkinson's disease	28	7.7135	2.46328e-15	NDUFA13, NDUFB7, UQCRB, NDUFA10, ATP5A1, ATP5C1, ATP5J, UQCR10, ATP5H, ATP5O, UQCRH, ATP5B, CYC1, NDUFA8, NDUFA5, NDUFA4, NDUFA2, SDHA, SDHB, UQCRQ, NDUFAB1, UQCRC1, PPIF, NDUFS3, CYCS, NDUFS2, UQCRC2, SLC25A4	212	149	7691	6.8174	4.98268e-13
304	3.Adipose	Proteome	Negative	KEGG_PATHWAY	mmu00020:Citrate cycle (TCA cycle)	15	4.13223	2.71837e-14	PDHA1, MDH1, MDH2, PDHB, SDHA, SDHB, CS, ACLY, SUCLG2, SUCLG1, ACO1, ACO2, DLAT, PCK1, DLD	212	32	7691	17.0055	5.54889e-12
305	3.Adipose	Proteome	Negative	KEGG_PATHWAY	mmu05010:Alzheimer's disease	29	7.98898	2.73996e-14	NDUFA13, NDUFB7, UQCRB, NDUFA10, ATP5A1, ATP5C1, ATP5J, ITPR3, UQCR10, ATP5H, ATP5O, HSD17B10, UQCRH, ATP5B, CYC1, NDUFA8, NDUFA5, NDUFA4, NDUFA2, SDHA, SDHB, UQCRQ, NDUFAB1, UQCRC1, NDUFS3, CYCS, NDUFS2, UQCRC2, PLCB1	212	177	7691	5.9439	5.59419e-12
306	3.Adipose	Proteome	Negative	KEGG_PATHWAY	mmu04146:Peroxisome	21	5.78512	4.23987e-14	PECR, GSTK1, ABCD2, ABCD3, ACSL1, PEX11A, EPHX2, ECI2, ACSL6, ACAA1B, SOD2, NUDT7, SCP2, ACOX1, PEX3, EHHADH, HACL1, MLYCD, DECR2, CRAT, PAOX	212	83	7691	9.17885	8.65175e-12
307	3.Adipose	Proteome	Negative	KEGG_PATHWAY	mmu05016:Huntington's disease	30	8.26446	7.21366e-14	NDUFA13, NDUFB7, UQCRB, NDUFA10, ATP5A1, ATP5C1, ATP5J, UQCR10, ATP5H, ATP5O, UQCRH, ATP5B, CYC1, NDUFA8, NDUFA5, NDUFA4, NDUFA2, SDHA, SOD2, SDHB, UQCRQ, NDUFAB1, UQCRC1, PPIF, NDUFS3, CYCS, NDUFS2, UQCRC2, PLCB1, SLC25A4	212	198	7691	5.49671	1.47216e-11
308	3.Adipose	Proteome	Negative	KEGG_PATHWAY	mmu00620:Pyruvate metabolism	15	4.13223	7.33123e-13	PDHA1, ACSS2, MDH1, MDH2, PDHB, ACACB, ACACA, ACAT2, LDHA, ALDH2, ME1, ME3, DLAT, PCK1, DLD	212	39	7691	13.9532	1.49548e-10
309	3.Adipose	Proteome	Negative	KEGG_PATHWAY	mmu00071:Fatty acid degradation	16	4.40771	1.58022e-12	GCDH, ACADVL, ECHS1, ACSL1, ECI1, ECI2, ACSL6, ACAA1B, ACADSB, ACAT2, CPT2, ALDH2, ACOX1, EHHADH, HADH, ACADS	212	49	7691	11.846	3.22357e-10
310	3.Adipose	Proteome	Negative	KEGG_PATHWAY	mmu00630:Glyoxylate and dicarboxylate metabolism	12	3.30579	1.14691e-10	CS, MCEE, PCCA, MDH1, MDH2, PCCB, ACO1, ACO2, GLUL, DLD, MUT, ACAT2	212	29	7691	15.0117	2.33969e-08
311	3.Adipose	Proteome	Negative	KEGG_PATHWAY	mmu04932:Non-alcoholic fatty liver disease (NAFLD)	22	6.06061	1.40182e-09	NDUFA8, NDUFA13, NDUFB7, NDUFA5, UQCRB, NDUFA4, NDUFA2, NDUFA10, UQCR10, SDHA, SDHB, UQCRH, UQCRQ, AKT2, NDUFAB1, UQCRC1, NDUFS3, CYCS, NDUFS2, CYC1, CYP2E1, UQCRC2	212	157	7691	5.08358	2.85972e-07
312	3.Adipose	Proteome	Negative	KEGG_PATHWAY	mmu00650:Butanoate metabolism	10	2.75482	2.26716e-08	ALDH5A1, ECHS1, ACSM3, EHHADH, ACSM5, L2HGDH, HADH, ACADS, ACAT2, AACS	212	27	7691	13.4364	4.625e-06
313	3.Adipose	Proteome	Negative	KEGG_PATHWAY	mmu04922:Glucagon signaling pathway	14	3.85675	2.98751e-06	PFKFB1, PDHA1, PHKB, ITPR3, PDHB, PYGL, ACACB, PHKA2, ACACA, GYS1, LDHA, AKT2, PCK1, PLCB1	212	100	7691	5.07896	0.000609267
314	3.Adipose	Proteome	Negative	KEGG_PATHWAY	mmu00980:Metabolism of xenobiotics by cytochrome P450	11	3.0303	8.10346e-06	CBR2, GSTK1, CBR1, ALDH3B2, CYP2S1, GSTT3, MGST1, GSTT2, CYP2E1, CBR3, GSTM5	212	64	7691	6.23533	0.00165175
315	3.Adipose	Proteome	Negative	KEGG_PATHWAY	mmu00010:Glycolysis / Gluconeogenesis	11	3.0303	1.07594e-05	ALDH3B2, LDHA, PDHA1, ACSS2, ALDH2, ALDOC, PDHB, DLAT, PCK1, DLD, PGM1	212	66	7691	6.04638	0.00219252
316	3.Adipose	Proteome	Negative	KEGG_PATHWAY	mmu00061:Fatty acid biosynthesis	6	1.65289	2.42495e-05	ACSL1, FASN, ACSL6, ACACB, MCAT, ACACA	212	14	7691	15.5478	0.00493475
317	3.Adipose	Proteome	Negative	KEGG_PATHWAY	mmu00410:beta-Alanine metabolism	8	2.20386	2.46475e-05	ALDH3B2, ALDH6A1, ECHS1, ALDH2, EHHADH, DPYD, MLYCD, HIBCH	212	33	7691	8.79474	0.00501553
318	3.Adipose	Proteome	Negative	KEGG_PATHWAY	mmu00062:Fatty acid elongation	7	1.92837	5.7744e-05	ECHS1, MECR, ACOT2, ACOT1, ELOVL6, HSD17B12, HADH	212	26	7691	9.76724	0.011711
319	3.Adipose	Proteome	Negative	KEGG_PATHWAY	mmu01040:Biosynthesis of unsaturated fatty acids	7	1.92837	7.25582e-05	PECR, ACOX1, ACOT2, ACOT1, ELOVL6, ACAA1B, HSD17B12	212	27	7691	9.40549	0.0146934
320	3.Adipose	Proteome	Negative	KEGG_PATHWAY	mmu00380:Tryptophan metabolism	8	2.20386	0.000261933	GCDH, ECHS1, MAOB, ALDH2, EHHADH, KYAT3, HADH, ACAT2	212	47	7691	6.17503	0.0520385
321	3.Adipose	Proteome	Negative	UP_TISSUE	Liver	168	46.281	7.31376e-34	PECR, MTCH2, ALDH1L1, ECI1, ECI2, NDUFA10, CISD1, ATP5C1, KLHDC7A, ACSM5, COMT, LACTB, CHCHD2, CHCHD3, SCP2, MPC2, BSG, LONP2, CHP1, MLYCD, HADH, ACAD11, ACAD10, GLUL, MAP3K4, MCCC2, GSTK1, DGAT1, PAQR4, ACSL1, SDHA, PHKA2, SDHB, TIMM8A1, ACLY, GPD2, GPD1, UQCRC1, ACOT1, SUCLG2, CYP2E1, UQCRC2, RABL6, PFKFB1, GCDH, FECH, MAOB, UQCRB, TMEM254A, PEX11A, MGST1, AK2, GSTT2, ATP5J, SDR39U1, ATP5H, PLA…	358	4216	22371	2.49007	9.65416e-32
322	3.Adipose	Proteome	Negative	UP_TISSUE	Kidney	95	26.1708	7.62625e-11	PECR, SLC27A1, ABCD3, ACSM3, CISD1, KLHDC7A, ACSM5, OPLAH, CLYBL, AACS, LY6C1, CHCHD3, HINT2, SCP2, CPT2, MPC2, SCRN3, BSG, ME1, PMPCA, HADH, HIBCH, GSTK1, MECR, ACAD9, MCCC1, PGD, PHKA2, ATP5J2, VWA8, ALDH5A1, CLPP, EHHADH, IVD, DPYD, PCCB, GPD1, NDUFS3, SUCLG2, SLC25A51, SUCLG1, CYP2E1, TKT, SHANK3, BCAT2, DAP3, GPM6A, GCDH, NDUFB7, FECH, UQCRB, TMEM254A, TIMM9, MGST1, GSTT2, SDR39U1, UQCR10, A…	358	3029	22371	1.95987	1.00666e-08
323	3.Adipose	Proteome	Negative	UP_TISSUE	Hippocampus	55	15.1515	5.21096e-10	MTCH2, CLPB, NDUFA10, ETFA, ALDH2, AIFM1, SCRN3, ME1, PMPCA, ME3, DLAT, GLUL, HIBCH, CBR1, GLRX5, WIPI1, SDHA, SDHB, ALDH5A1, PPA1, GPD2, GPD1, UQCRC1, NDUFS3, NDUFS2, SUCLG1, ALDOC, UQCRC2, TKT, DLD, SLC25A4, ECHS1, ATP5A1, PDHB, ATP5H, PLA2G6, UQCRH, ACAT2, ATP5L, PRDX3, ATP5B, LDHA, CYC1, CNNM2, VPS16, MPST, PDHA1, MDH1, NDUFA5, MDH2, FMO1, SOD2, CS, ACO2, GSTM5	358	1359	22371	2.52898	6.87847e-08
324	3.Adipose	Proteome	Negative	UP_TISSUE	Heart	40	11.0193	7.94193e-05	ACADVL, MTCH2, FECH, UQCRB, ATP5A1, LDB3, UQCR10, OPLAH, ATP5O, ACACB, ATP5B, LDHA, PMPCA, ACAD11, ACADS, BCHE, TSFM, APOBEC2, PDHA1, EPHX2, BCKDHB, MCCC1, SDHA, UPK3B, SOD2, PHKA2, SDHB, COQ10B, COQ3, TMEM135, UQCRQ, PEX3, CLPP, SUCLG2, SUCLG1, COQ8A, ACO2, DLD, SLC25A4, MYH7	358	1276	22371	1.9589	0.010429
325	3.Adipose	Proteome	Negative	UP_TISSUE	Mammary tumor	76	20.9366	0.000406013	MTCH2, ABCD2, ATP5C1, ECSIT, EPM2AIP1, GYS1, CHCHD2, CHCHD6, MACROD1, PDK3, DLAT, MLYCD, XXYLT1, ACAD10, PSPH, MECR, SCARA5, WIPI1, ELOVL6, SDHA, BCS1L, HDHD3, PCP4, PCCA, PPA1, GPD2, PPIF, SUCLG2, NDUFS2, L2HGDH, DLD, LYPLAL1, IDI1, UQCRB, PEX11A, MGST1, ITPR3, MRPL15, HSD17B12, PDHB, ATP5O, PLA2G6, TBRG4, ATP5L, ATP5B, PGRMC2, RHOT1, UGP2, GRPEL1, PITRM1, DHRS7B, ISOC1, CNNM2, CBR4, VPS16, TSNA…	358	3220	22371	1.47489	0.0521932
326	3.Adipose	Proteome	Positive	GOTERM_BP_DIRECT	GO:0006457~protein folding	21	3.48259	3.59595e-09	FKBP11, PDIA3, CD74, TXNL1, P3H1, TBCC, PDIA6, HSP90B1, PDIA4, CCT6A, ERP44, NUDCD2, TMX3, TMX1, DNAJB11, ERP29, P4HB, CALR, CCT7, CCT5, FKBP5	573	128	18082	5.17727	9.88163e-06
327	3.Adipose	Proteome	Positive	GOTERM_BP_DIRECT	GO:0045454~cell redox homeostasis	14	2.32172	1.00735e-07	PDIA3, TXNDC9, TXNRD1, TXNL1, PDIA6, PDIA4, ERP44, PRDX4, TMX3, TMX1, NNT, PRDX1, SH3BGRL3, P4HB	573	65	18082	6.79683	0.00027678
328	3.Adipose	Proteome	Positive	GOTERM_BP_DIRECT	GO:0007159~leukocyte cell-cell adhesion	9	1.49254	4.48833e-07	ITGB1, PTPRC, ITGAM, SYK, ITGB2, MSN, EZR, FERMT3, ICAM1	573	24	18082	11.8338	0.00123263
329	3.Adipose	Proteome	Positive	GOTERM_BP_DIRECT	GO:0098609~cell-cell adhesion	22	3.64842	6.17269e-07	TXNDC9, STAT1, IST1, HDLBP, TWF1, SLC3A2, CAPG, BZW1, FAM129B, KLC2, PRDX1, CAPZA1, PACSIN2, EFHD2, SFN, EIF3E, RPL15, LRRFIP1, WASF2, SNX5, SCYL1, HSPA1A	573	189	18082	3.67327	0.00169482
330	3.Adipose	Proteome	Positive	GOTERM_BP_DIRECT	GO:0034976~response to endoplasmic reticulum stress	14	2.32172	6.81368e-07	PDIA3, PTPN1, HSPA5, EEF2, EIF2S1, PDIA6, PDIA4, ERP44, COL4A3BP, TMX3, TMX1, FLOT1, HYOU1, P4HB	573	76	18082	5.81308	0.00187065
331	3.Adipose	Proteome	Positive	GOTERM_BP_DIRECT	GO:0006897~endocytosis	21	3.48259	1.24454e-06	APP, LRP1, TFRC, SH3KBP1, SNX12, CLTA, SYNJ2BP, EEA1, MRC2, DNM3, MYO1E, RABEP1, NCL, PACSIN2, FLOT1, ATP6V1H, RAC1, WASF2, SNX5, PICALM, SNX6	573	181	18082	3.66128	0.00341416
332	3.Adipose	Proteome	Positive	GOTERM_BP_DIRECT	GO:0008283~cell proliferation	23	3.81426	2.00607e-06	CSF1R, CD74, PDXK, MAP2K1, MCM7, LRP1, MVP, TXNRD1, SRRT, BRCA2, GNAI2, RAP1B, COL4A3BP, GNG2, PRDX1, MAP7, ANXA7, BAX, PTPN6, BAK1, RAC1, APPL1, PICALM	573	220	18082	3.29911	0.00549751
333	3.Adipose	Proteome	Positive	GOTERM_BP_DIRECT	GO:0015031~protein transport	41	6.79934	5.67692e-06	ARF3, ARF4, CD63, TSG101, RAB5C, TMED10, GDI2, AKAP8, SNX12, RRBP1, MIA3, IPO7, AP3M1, LMAN1, SEC61A1, TMED3, TMED1, SEC61B, TNPO1, SEC62, SIL1, SEC23B, RAB8A, SNX5, RAB8B, SNX6, NSF, RAB4B, NUP210, IST1, YIPF5, RAB3IL1, STAM, ACTN4, COMMD1, KTN1, SCAMP2, RABEP1, PPT1, ARF5, KPNB1	573	592	18082	2.18552	0.0154792
334	3.Adipose	Proteome	Positive	GOTERM_BP_DIRECT	GO:0034314~Arp2/3 complex-mediated actin nucleation	7	1.16086	5.96336e-06	ACTR3, ACTR2, ARPC2, ARPC3, ARPC1B, ARPC4, ARPC5	573	16	18082	13.8061	0.0162538
335	3.Adipose	Proteome	Positive	GOTERM_BP_DIRECT	GO:0051016~barbed-end actin filament capping	7	1.16086	5.96336e-06	GSN, CAPZA1, RDX, CAPZA2, TWF1, EVL, CAPG	573	16	18082	13.8061	0.0162538
336	3.Adipose	Proteome	Positive	GOTERM_BP_DIRECT	GO:0007264~small GTPase mediated signal transduction	23	3.81426	6.33206e-06	ARF3, ARF4, RALA, RAB4B, RALB, RAB5C, DOCK8, GDI2, ARL1, RHOG, VAV1, RAB43, RAP1B, DOCK11, NRAS, RAC2, HMOX1, RAC1, DOCK2, ARHGEF7, ARF5, RAB8A, RAB8B	573	236	18082	3.07544	0.01725
337	3.Adipose	Proteome	Positive	GOTERM_CC_DIRECT	GO:0070062~extracellular exosome	268	44.4444	3.11603e-80	GLTP, CYFIP2, APP, CYFIP1, RNH1, TFRC, NUBP1, ICAM1, AQP1, C4B, LGALS3, PSMD6, RPS18, CPNE1, CPNE3, SNRPD3, RPS11, ATP6V1E1, EPHB4, PRKCD, HPCAL1, P3H1, KRT7, MOGS, ACTN4, SCAMP2, MTHFD1, CCNY, SUB1, ATP6V0D1, EZR, RPL28, H2-D1, LXN, PTTG1IP, IQGAP1, GLG1, HPX, PRDX4, FXR2, PRDX1, SFN, NCKAP1L, APOE, CTSA, LYN, VAT1, YES1, RDX, PA2G4, GNG12, DERA, CCT6A, VNN1, EIF6, PPT1, GRB2, HYOU1, CALR, CALM1…	595	2674	19662	3.31195	1.7886e-77
338	3.Adipose	Proteome	Positive	GOTERM_CC_DIRECT	GO:0005737~cytoplasm	345	57.2139	9.87763e-35	GLTP, CYFIP2, APP, CYFIP1, RNH1, TFRC, RTCB, SMC3, RPL8, NOC2L, IFI30, EPRS, NUBP1, AQP1, GLS, PSMD9, HERC4, LGALS3, RAVER1, PPP4R2, RPS18, SNRPD1, CPNE1, PIP4K2A, CPNE3, SNRPD3, RPS11, ATP6V1E1, PRKCD, P3H1, KRT7, ACTN4, EML4, BIN2, MTHFD1, EWSR1, JTB, EZR, RPL28, MACF1, LXN, DHX9, FLII, TWF1, PTTG1IP, IQGAP1, MTMR6, RIC8A, PPP3R1, PPP4C, PRDX4, FXR2, PRDX1, INPP5D, MAP7, MCMBP, SFN, APOE, SNX5,…	595	6631	19662	1.7193	5.66976e-32
339	3.Adipose	Proteome	Positive	GOTERM_CC_DIRECT	GO:0016020~membrane	347	57.5456	1.97456e-30	CYFIP2, APP, SLC35B2, TFRC, CISD2, RPL8, EPRS, ICAM1, AQP1, LGALS3, STS, RPS18, CPNE1, PIP4K2A, CPNE3, RPS11, SEC62, EPHB4, CPT1A, NUP210, PRKCD, HPCAL1, P3H1, MOGS, SCAMP2, EML4, MTHFD1, SOAT1, CCNY, EWSR1, JTB, FAR1, ATP6V0D1, EZR, RPL28, H2-D1, MACF1, DHX9, PTTG1IP, IQGAP1, GLG1, RIC8A, PPP3R1, FXR2, INPP5D, MAP7, HMOX1, NCKAP1L, APOE, HMOX2, SNX5, SNX6, CTSA, LYN, VAT1, FIS1, YES1, RDX, STAM,…	595	6998	19662	1.63857	1.1334e-27
340	3.Adipose	Proteome	Positive	GOTERM_CC_DIRECT	GO:0005925~focal adhesion	65	10.7794	5.53486e-29	ITGB1, NRP1, CYFIP1, SH3KBP1, ARPC1B, GDI2, RPL10A, RPL8, ICAM1, MRC2, RPS18, CFL1, RAC2, FLOT1, FLOT2, RPLP2, CPNE3, RAC1, RPS11, ACTR3, PDGFRB, PDIA3, ACTR2, MAP2K1, ANXA1, ANXA5, RHOG, ACTN4, APBB1IP, HCK, ADAM9, EVL, LCP1, EZR, ARHGEF7, CD44, RALA, LRP1, FLII, TWF1, IQGAP1, CORO1B, HSP90B1, SDCBP, PACSIN2, RPS3, PTK2B, RPL19, GSN, YES1, HSPA5, RDX, MSN, ARPC5, IGF2R, MARCKS, PTPRC, ARPC2, ARP…	595	391	19662	5.49348	3.17701e-26
341	3.Adipose	Proteome	Positive	GOTERM_CC_DIRECT	GO:0005829~cytosol	142	23.5489	1.76682e-27	NCF4, GIMAP4, IPO7, NUBP1, GLS, PYCARD, HERC4, COL4A3BP, LAMP1, RPS18, SNRPD1, CFL1, CPNE1, CPNE3, SNRPD3, ATP6V1E1, SH3GLB1, MAP2K1, IST1, PRKCD, RPSA, NRBP1, MTHFD1, CRYZL1, SNRPG, SNRPF, EZR, ATP6V1A, ARL1, KLC1, CORO1A, CORO1B, HSP90B1, RIC8A, RAP1B, SDCBP, PPP3R1, PRDX4, KLC2, PRDX1, ALDH3B1, INPP5D, UAP1L1, PACSIN2, HMOX1, NCKAP1L, SFN, APOE, SRGAP2, SNX5, SNX6, LYN, YES1, GLMP, MT2, MT1, E…	595	1784	19662	2.63029	1.01415e-24
342	3.Adipose	Proteome	Positive	GOTERM_CC_DIRECT	GO:0042470~melanosome	25	4.14594	2.50329e-15	ITGB1, CD63, RAB5C, TMED10, TFRC, CNP, SLC3A2, CAPG, HSP90B1, SDCBP, GANAB, LAMP1, GPNMB, PRDX1, FLOT1, RAC1, CTSD, PDIA3, HSPA5, TRPV2, PDIA6, PDIA4, ERP29, ATP6V1B2, P4HB	595	101	19662	8.17955	1.46572e-12
343	3.Adipose	Proteome	Positive	GOTERM_CC_DIRECT	GO:0048471~perinuclear region of cytoplasm	64	10.6136	4.87793e-15	ITGB1, ARF3, CYFIP2, APP, CYFIP1, CLIC4, TFRC, CISD2, WDR44, COL4A3BP, LAMP1, HEPH, RACK1, FLOT2, ABCD1, CLIC1, RAB8B, ACTR3, TPD52, MAP2K1, ANXA4, PRKCD, NME2, CYBB, ACTN4, CKAP4, NRBP1, DNM3, MCM3, S100A4, ZP3, EZR, ARF5, LRP1, CNP, MVP, TWF1, AIF1, CORO1B, HSP90B1, LMNA, MAP7, HMOX1, PTK2B, SEC23B, LYN, RAB4B, GSN, FUS, STAT1, GALNT1, M6PR, MSN, MT2, MT1, SYNJ2BP, IGF2R, SEC23IP, GNB2, BAX, CA…	595	692	19662	3.05622	2.80398e-12
344	3.Adipose	Proteome	Positive	GOTERM_CC_DIRECT	GO:0005913~cell-cell adherens junction	41	6.79934	1.70972e-14	ITGB1, TXNDC9, HDLBP, TWF1, SLC3A2, CAPG, IQGAP1, BZW1, CORO1B, FAM129B, SDCBP, KLC2, PRDX1, EFHD2, PACSIN2, RACK1, FLOT1, FLOT2, SFN, LRRFIP1, RPL15, CLIC1, WASF2, SNX5, SCYL1, LYN, SH3GLB1, PTPN1, RANBP1, ANXA1, HSPA5, IST1, STAT1, TMOD3, RDX, EEF2, CAPZA1, EIF3E, EZR, HSPA1A, PICALM	595	316	19662	4.28753	9.81393e-12
345	3.Adipose	Proteome	Positive	GOTERM_CC_DIRECT	GO:0005783~endoplasmic reticulum	93	15.4229	3.61822e-14	PIGS, CTSZ, H2-K1, CISD2, PLOD3, MIA3, PLOD2, PLOD1, AUP1, PYCARD, SEC61A1, COL4A3BP, STS, TMED3, TMED1, SLC39A7, SEC61B, CLCC1, SEC62, UBXN4, COLGALT1, SIL1, SH3GLB1, TPD52, PDIA3, MAP2K1, PCYT1A, NUP210, PRKCD, ANXA5, CYBB, P3H1, MOGS, PDIA6, CKAP4, PDIA4, DNAJC3, TMX3, SOAT1, ASPH, TMX1, DNAJB11, MZB1, ERP29, CHIL3, ZP3, SQSTM1, H2-D1, RTN1, TMED10, H2-Q7, PLD4, RRBP1, ATP1A1, LMF2, PLD3, HSP9…	595	1323	19662	2.32292	2.07749e-11
346	3.Adipose	Proteome	Positive	GOTERM_CC_DIRECT	GO:0030027~lamellipodium	27	4.47761	4.24303e-12	ITGB1, CYFIP1, AIF1, CORO1A, CORO1B, PPP1R9B, CFL1, RAC2, FLOT1, PTK2B, FLOT2, SH3BGRL3, RAC1, SRGAP2, WASF2, ACTR3, GSN, TMOD3, RDX, TRPV2, NME2, ARPC5, NRBP1, APBB1IP, ARPC3, EVL, ARHGEF7	595	164	19662	5.4404	2.43551e-09
347	3.Adipose	Proteome	Positive	GOTERM_CC_DIRECT	GO:0005790~smooth endoplasmic reticulum	13	2.15589	1.68062e-11	PDIA3, APP, RTN1, HSPA5, SRI, PDIA6, HSP90B1, PDIA4, DNAJC3, PRDX4, ERP29, HYOU1, CALR	595	29	19662	14.8134	9.64671e-09
348	3.Adipose	Proteome	Positive	GOTERM_CC_DIRECT	GO:0005768~endosome	47	7.79436	3.3881e-10	ITGB1, CD63, APP, LEPROT, TSG101, RAB5C, CDKN1B, LRP1, TFRC, NCF4, SPPL2A, CLEC16A, SNX12, ATP1A2, ATP1A1, WDR44, RAB43, EEA1, LAMP1, PACSIN2, FLOT1, FLOT2, APOE, ATP6V1E1, RAB8A, SNX5, APPL1, SNX6, OSBPL9, RAB4B, ANXA1, M6PR, STAM, COMMD1, IGF2R, PML, SCAMP2, RABEP1, ARPC2, CDK2, GRB2, PKN1, EZR, CD68, SQSTM1, ITM2B, PICALM	595	544	19662	2.85502	1.94477e-07
349	3.Adipose	Proteome	Positive	GOTERM_CC_DIRECT	GO:0030529~intracellular ribonucleoprotein complex	34	5.63847	8.59564e-10	DHX9, RPLP1, MVP, IQGAP1, RPL8, EPRS, RPL10A, PRPF8, RAVER1, PABPN1, SNRPD1, RPS18, RUVBL2, RPS3, RPLP2, SNRPD3, RPL15, RPS11, RPS27A, RPL19, NCBP1, RPSA, ACTN4, PA2G4, EEF2, LSM8, AGO3, HNRNPH1, HNRNPF, NCL, SNRPF, RPL28, SNRPA, RPS23	595	320	19662	3.51107	4.9339e-07
350	3.Adipose	Proteome	Positive	GOTERM_CC_DIRECT	GO:0031410~cytoplasmic vesicle	50	8.29187	3.47468e-09	ITGB1, APP, CLIC4, TFRC, SH3KBP1, CLTB, CLTA, EEA1, RAB43, LAMP1, FLOT1, TMED3, FLOT2, RAC1, FAM3C, RAB8A, RAB8B, SH3GLB1, PDGFRB, ANXA1, SYK, IST1, COMMD1, COMMD7, HCK, RABEP1, NGP, CHIL3, SQSTM1, RAB5C, RGS19, TMED10, C5AR1, KLC1, CORO1A, AP3M1, EBP, GPNMB, PACSIN2, SRGAP2, SNX5, UBQLN2, SNX6, PTPN1, YIPF5, MYO1E, FMNL1, SEC23IP, PKN1, PICALM	595	646	19662	2.55769	1.99446e-06
351	3.Adipose	Proteome	Positive	GOTERM_CC_DIRECT	GO:0005856~cytoskeleton	71	11.7745	4.51501e-09	WDR1, SH3KBP1, CETN2, ARPC1B, BRCA2, NUBP1, PPP1R9B, NUDCD2, PPP4R2, CFL1, MYO18A, COTL1, RAB8A, SCYL1, ACTR3, ACTR2, MAP2K1, IST1, TMOD3, TUBG1, CKAP4, DNM3, EML4, APBB1IP, HCK, DNAJC7, JTB, EVL, LCP1, EZR, DOCK2, S100A9, MACF1, TXNDC9, RABGAP1, FLII, MVP, GNAI3, WAS, TWF1, KLC1, CORO1A, AIF1, CORO1B, GNAI2, SDCBP, KLC2, PPP4C, INPP5D, PACSIN2, RPS3, MAP7, PTK2B, WASF2, CCT5, GSN, YES1, RDX, NEK…	595	1113	19662	2.10802	2.59161e-06
352	3.Adipose	Proteome	Positive	GOTERM_CC_DIRECT	GO:0009986~cell surface	48	7.9602	1.16286e-08	ITGB1, NRP1, CD63, APP, CSF1R, RALA, CLIC4, ITGAM, TFRC, ITGB2, H2-Q7, C5AR1, H2-K1, SLC3A2, IDE, CTSS, ICAM1, MRC2, LGALS3, LAMP1, APOE, PDGFRB, PDIA3, CD74, FCER1G, ANXA1, HSPA5, ANXA4, BGN, TRPV2, MSN, SYNJ2BP, IGF2R, CKAP4, PDIA4, ERP44, PTPRC, FOLH1, TMX3, FCGR4, NCL, ERP29, PLXNB2, ADAM9, CALR, CD44, NECTIN2, H2-D1	595	629	19662	2.52175	6.67482e-06
353	3.Adipose	Proteome	Positive	GOTERM_CC_DIRECT	GO:0034663~endoplasmic reticulum chaperone complex	8	1.3267	1.5397e-08	HSPA5, DNAJB11, MZB1, HYOU1, P4HB, PDIA6, PDIA4, HSP90B1	595	12	19662	22.0303	8.83782e-06
354	3.Adipose	Proteome	Positive	GOTERM_CC_DIRECT	GO:0031012~extracellular matrix	30	4.97512	2.47746e-08	LGALS3BP, ARF4, ECM1, FBLN2, FBLN5, HSP90B1, LGALS3, GANAB, RPS18, PRDX1, LMNA, CFL1, RPS3, RAC1, APOE, RPS11, CTSD, RAB8A, HSPA5, BGN, RPSA, EEF2, SOD3, CKAP4, CCT6A, SFPQ, P4HB, CALR, ZP3, S100A9	595	294	19662	3.37198	1.42205e-05
355	3.Adipose	Proteome	Positive	GOTERM_CC_DIRECT	GO:0005911~cell-cell junction	24	3.9801	4.6837e-08	ACTR3, ITGB1, APP, CLIC4, WDR1, SH3KBP1, TMOD3, PRKCD, WAS, TWF1, ACTN4, IQGAP1, CORO1A, VAV1, RAP1B, MYO1E, CAPZA1, CFL1, PACSIN2, FLOT1, GRB2, PTPN6, WASF2, NECTIN2	595	201	19662	3.94572	2.68841e-05
356	3.Adipose	Proteome	Positive	GOTERM_CC_DIRECT	GO:0005635~nuclear envelope	21	3.48259	6.60758e-08	SUN1, PCYT1A, NUP210, IST1, RTCB, CYBB, IPO7, MTMR6, LMNB1, EBP, LMNA, ALOX5AP, RAC2, ANXA7, BAX, CHIL3, APOE, UBXN4, LBR, CLIC1, KPNB1	595	158	19662	4.39211	3.79268e-05
357	3.Adipose	Proteome	Positive	GOTERM_CC_DIRECT	GO:0005884~actin filament	14	2.32172	1.04661e-07	ACTR3, YES1, WDR1, GNG12, AIF1, CORO1A, CORO1B, HCK, INPP5D, RAC2, PLS3, LCP1, RAC1, EZR	595	68	19662	6.80346	6.00735e-05
358	3.Adipose	Proteome	Positive	GOTERM_CC_DIRECT	GO:0005634~nucleus	241	39.9668	1.74893e-07	CYFIP2, TFRC, RTCB, SMC3, NOC2L, NUBP1, AQP1, PSMD9, HERC4, LGALS3, RAVER1, PPP4R2, RPS18, SNRPD1, CPNE1, PIP4K2A, CPNE3, SNRPD3, NUP210, PRKCD, P3H1, KRT7, ACTN4, CCNY, EWSR1, SUB1, DHX9, CSTF3, FLII, PTTG1IP, IQGAP1, HTATSF1, MTMR6, PPP4C, PRDX4, FXR2, PRDX1, HMOX1, MCMBP, SFN, APOE, SNX6, LYN, H3F3C, SMARCA5, PA2G4, DERA, SMARCA4, STAG1, EIF6, FUBP1, HNRNPF, PPT1, REL, GRB2, CALR, CALM1, CC2D1…	595	6019	19662	1.32313	0.000100383
359	3.Adipose	Proteome	Positive	GOTERM_CC_DIRECT	GO:0005885~Arp2/3 protein complex	7	1.16086	3.01008e-07	ACTR3, ACTR2, ARPC2, ARPC3, ARPC1B, ARPC4, ARPC5	595	11	19662	21.0289	0.000172764
360	3.Adipose	Proteome	Positive	GOTERM_CC_DIRECT	GO:0043231~intracellular membrane-bounded organelle	50	8.29187	3.68845e-07	APP, TFRC, CTSZ, SPPL2A, CLTB, CISD2, CLTA, MIA3, IFI30, CHD2, CTSS, IKBKB, CASP7, STS, CLCC1, CPT1A, SUN1, COMMD7, SCAMP2, RABEP1, AGPS, ATP6V1B2, MCM3, GRN, RAB5C, TMED10, ATP1A2, ATP1A1, HSD17B11, GLG1, LMAN1, EBP, TRA2A, PACSIN2, HMOX1, SEC23B, SEC11A, HMOX2, SNX6, CTSA, EPHX1, SPCS2, NCEH1, MYBBP1A, P4HA2, PTPRA, CDK2, CALR, ITM2B, CC2D1B	595	751	19662	2.20009	0.000211695
361	3.Adipose	Proteome	Positive	GOTERM_CC_DIRECT	GO:0005788~endoplasmic reticulum lumen	16	2.6534	5.32838e-07	PDIA3, HSPA5, PDIA6, HSP90B1, PDIA4, DNAJC3, ERP44, P4HA2, DNAJB11, ERP29, MZB1, HYOU1, P4HB, CALR, COLGALT1, SIL1	595	104	19662	5.0839	0.000305803
362	3.Adipose	Proteome	Positive	GOTERM_CC_DIRECT	GO:0005765~lysosomal membrane	24	3.9801	7.38037e-07	CTSA, NSF, ATP6V1A, CD63, RAB5C, LRP1, SPPL2A, GNAI3, M6PR, GLMP, IGF2R, GDAP2, AP3M1, GNB2, GNAQ, FLOT1, ATP6V1B2, ATP6V1H, UBA1, CD68, ATP6V0D1, ATP6V1E1, DAGLB, ATP6V1D	595	234	19662	3.38927	0.000423544
363	3.Adipose	Proteome	Positive	GOTERM_CC_DIRECT	GO:0001891~phagocytic cup	8	1.3267	1.22021e-06	ANXA1, BIN2, RACK1, RAC1, LCP1, CORO1A, AIF1, SNX5	595	20	19662	13.2182	0.000700153
364	3.Adipose	Proteome	Positive	GOTERM_CC_DIRECT	GO:0045121~membrane raft	25	4.14594	1.51332e-06	ITGB1, APP, RGS19, ITGB2, GNAI3, ATP1A1, IQGAP1, GNAI2, ICAM1, IKBKB, SDCBP, CASP8, INPP5D, EFHD2, FLOT1, PTK2B, FLOT2, CTSD, LYN, FCER1G, EEF2, PTPRC, PPT1, EZR, H2-D1	595	262	19662	3.15318	0.000868269
365	3.Adipose	Proteome	Positive	GOTERM_CC_DIRECT	GO:0043209~myelin sheath	21	3.48259	1.5787e-06	PDIA3, NSF, ATP6V1A, RALA, GSN, HSPA5, WDR1, CNP, RDX, GDI2, NME2, MSN, ATP1A2, ATP1A1, ASS1, GNB2, PRDX1, ATP6V1B2, EZR, RPS27A, CCT5	595	192	19662	3.61434	0.000905762
366	3.Adipose	Proteome	Positive	GOTERM_CC_DIRECT	GO:0005730~nucleolus	52	8.62355	1.95594e-06	FEN1, NOC2L, RPL10A, RPL8, CHD2, PYCARD, RBM3, SUMO1, NUDT16, RPS11, RAB8A, SUN1, TMX1, EWSR1, NCL, SUB1, AGPS, EZR, TSG101, LRP1, DHX9, AKAP8, DDX21, CAPG, FAM129B, EXOSC6, EXOSC4, PRDX1, TRA2A, RPS3, HMOX1, BRIX1, RPS27A, CCT5, RPL19, NAA10, STAT1, TXNRD1, NONO, SMARCA5, PYM1, SSRP1, PA2G4, PML, SMARCA4, H1F0, MYBBP1A, EIF6, EIF3L, GRB2, PTPN6, RPS23	595	842	19662	2.04081	0.00112208
367	3.Adipose	Proteome	Positive	GOTERM_CC_DIRECT	GO:0005654~nucleoplasm	95	15.7546	2.31996e-06	FEN1, RNH1, MCM7, NUMA1, PSIP1, IDE, NOC2L, BRCA2, SMC3, CHD2, ELAVL1, IPO7, LMNB1, PPP1R9B, RBM3, PPP3CA, COL4A3BP, CASP8, SUMO1, PPP4R2, RUVBL2, DDI2, MYO18A, SLC39A7, SNRPD3, NUDT16, ANXA1, NCBP1, PRMT1, CAD, COMMD1, PARP9, THOC6, SCAMP2, SFPQ, DNAJC7, PSMA1, HNRNPH1, NCL, MAPKAPK2, MCM3, PTMA, KPNB1, FKBP5, GTF2A1, PDXK, CNP, DHX9, FLII, CSTF3, SRRT, AKAP8, DDX21, CAPG, SRI, HTATSF1, SAMHD1, …	595	1935	19662	1.62238	0.00133077
368	3.Adipose	Proteome	Positive	GOTERM_CC_DIRECT	GO:0005789~endoplasmic reticulum membrane	46	7.62852	2.50379e-06	FKBP11, RTN1, TMED10, RTCB, PLD4, CISD2, MIA3, SRI, LMF2, PLD3, HSP90B1, SDCBP, LMAN1, SEC61A1, EBP, STS, TMED3, HMOX1, ANXA7, TMED1, SLC39A7, SEC62, UBXN4, MEST, SEC11A, SEC23B, HSD3B6, OSBPL8, PCYT1A, NUP210, HSPA5, HSD3B1, EPHX1, YIPF5, MOGS, CKAP4, KTN1, ERP44, TMX3, SOAT1, TMX1, TBXAS1, ALOX5AP, RFT1, BAX, FKBP5	595	710	19662	2.14097	0.00143614
369	3.Adipose	Proteome	Positive	GOTERM_CC_DIRECT	GO:0045335~phagocytic vesicle	10	1.65837	2.91295e-06	RAB43, FMNL1, LAMP1, CYBB, PLD4, CALR, SRGAP2, CORO1A, RAB8A, RAB8B	595	41	19662	8.05985	0.00167064
370	3.Adipose	Proteome	Positive	GOTERM_CC_DIRECT	GO:0043234~protein complex	41	6.79934	8.07096e-06	PRPS2, CD63, FEN1, CDKN1B, CISD2, ATP1A1, IQGAP1, IL1RAP, BRCA2, STK4, CORO1A, PYCARD, PRPSAP1, HK3, CASP8, KLC2, RBBP4, CASP1, MTA2, SH3GLB1, FIS1, GSN, ANXA1, SYK, PRMT1, CAD, ACTN4, SMARCA4, MYO1E, SYNJ1, GNAQ, GNB2, GRB2, CALR, PKN1, SUGT1, ATP6V0D1, ARHGEF7, KPNB1, CD44, HSPA1A	595	628	19662	2.15742	0.00462203
371	3.Adipose	Proteome	Positive	GOTERM_CC_DIRECT	GO:0005764~lysosome	27	4.47761	9.5134e-06	CD63, CTSZ, SPPL2A, CLEC16A, PRCP, IFI30, CTSS, LAMP1, PSAP, CTSF, APOE, CTSD, CTSA, PDGFRB, CD74, M6PR, GLMP, MT1, H2-AA, IGF2R, ASS1, HCK, PPT1, CD68, GLA, SQSTM1, ENGASE	595	331	19662	2.69554	0.00544584
372	3.Adipose	Proteome	Positive	GOTERM_CC_DIRECT	GO:1903561~extracellular vesicle	10	1.65837	1.37737e-05	DNAJC3, SDCBP, TFRC, ITGB2, ATP1A2, CTSF, APOE, ATP1A1, FBLN2, GNAI2	595	49	19662	6.74395	0.00787498
373	3.Adipose	Proteome	Positive	GOTERM_CC_DIRECT	GO:0032587~ruffle membrane	12	1.99005	2.4484e-05	ITGB1, MACF1, ARF4, CFL1, PACSIN2, RPS3, TWF1, RAC1, LCP1, EZR, AIF1, PPP1R9B	595	79	19662	5.01955	0.0139557
374	3.Adipose	Proteome	Positive	GOTERM_CC_DIRECT	GO:0001726~ruffle	13	2.15589	2.87717e-05	CYFIP1, GSN, TMOD3, RDX, NME2, IQGAP1, AIF1, ATP6V1B2, LCP1, EZR, ARHGEF7, WASF2, SNX5	595	95	19662	4.522	0.0163796
375	3.Adipose	Proteome	Positive	GOTERM_CC_DIRECT	GO:0005622~intracellular	78	12.9353	2.94655e-05	FAM49A, ARF3, ARF4, CLIC4, GMFB, CETN2, DOCK8, RPLP1, GMFG, GDI2, MTR, MIA3, RPL8, IPO7, IKBKB, RAB43, DOCK11, NUDCD2, HEPH, RPS18, RUVBL2, CFL1, RAC2, COTL1, RPLP2, RAC1, RPS11, TNPO1, RAB8A, RAB8B, RIPK3, PRKCD, ANXA5, RHOG, BGN, CYBB, RPSA, IL16, ACTN4, VAV1, RASA4, EZR, DOCK2, ARHGEF7, RPL28, ARF5, KPNB1, CSF1R, RALA, RALB, RAB5C, RABGAP1, NPR3, ARL1, TWF1, SRI, RAP1B, SDCBP, AP3M1, NRAS, RPL…	595	1599	19662	1.61197	0.0167712
376	3.Adipose	Proteome	Positive	GOTERM_CC_DIRECT	GO:0042995~cell projection	43	7.13101	2.98207e-05	ITGB1, CYFIP1, MACF1, WDR1, CNP, KLC1, AIF1, NUBP1, PPP1R9B, RBM3, CFL1, PACSIN2, RACK1, PTK2B, RAC1, SRGAP2, RAB8A, SNX5, CAMP, ACTR3, ACTR2, ANXA1, CAD, ANXA5, SORD, NME2, MSN, ARPC4, ARPC5, NRBP1, APBB1IP, HCK, ARPC2, BIN2, ARPC3, CAPRIN1, DPEP1, EVL, LCP1, CD302, EZR, ARHGEF7, FERMT3	595	712	19662	1.99572	0.0169717
377	3.Adipose	Proteome	Positive	GOTERM_CC_DIRECT	GO:0005793~endoplasmic reticulum-Golgi intermediate compartment	11	1.82421	3.52557e-05	LMAN1, ERP44, TMED10, HSPA5, IST1, MYO18A, TMED3, TMED1, P4HB, PDIA6, SCYL1	595	68	19662	5.34558	0.0200337
378	3.Adipose	Proteome	Positive	GOTERM_CC_DIRECT	GO:0016363~nuclear matrix	13	2.15589	3.55252e-05	RNASEL, CLIC4, NUMA1, NONO, PRKCD, CAD, AKAP8, SMC3, PML, LMNB1, SFPQ, LMNA, CFL1	595	97	19662	4.42876	0.0201853
379	3.Adipose	Proteome	Positive	GOTERM_CC_DIRECT	GO:0030496~midbody	15	2.48756	3.95691e-05	SH3GLB1, RALA, CLIC4, RALB, TXNDC9, HSPA5, IST1, RDX, GNAI3, IQGAP1, HSP90B1, GNAI2, RACK1, JTB, PKN1	595	130	19662	3.81293	0.0224571
380	3.Adipose	Proteome	Positive	GOTERM_CC_DIRECT	GO:0072562~blood microparticle	15	2.48756	5.09921e-05	C1QB, LGALS3BP, ITIH2, GSN, TFRC, CD5L, MSN, ITIH1, C4B, HPX, SDCBP, APOE, ANGPTL4, CLIC1, HSPA1A	595	133	19662	3.72692	0.028846
381	3.Adipose	Proteome	Positive	GOTERM_CC_DIRECT	GO:0016023~cytoplasmic, membrane-bounded vesicle	16	2.6534	5.46722e-05	PDGFRB, RGS19, TFRC, IST1, C5AR1, CLTA, COMMD1, KLC1, COMMD7, EBP, GPNMB, CHIL3, RAC1, PKN1, FAM3C, SNX6	595	151	19662	3.5015	0.0308954
382	3.Adipose	Proteome	Positive	GOTERM_MF_DIRECT	GO:0044822~poly(A) RNA binding	104	17.2471	5.49168e-23	TFRC, H2-K1, RTCB, HDLBP, CISD2, RPL8, NOC2L, RPL10A, BZW1, LGALS3, RAVER1, RPS18, SNRPD1, CPNE3, SNRPD3, RPS11, PDIA3, RPSA, ACTN4, PDIA4, EWSR1, NCL, SUB1, SRSF2, S100A4, EZR, RPL28, KPNB1, H2-D1, MACF1, DHX9, CSTF3, HTATSF1, PRPF8, CORO1A, FXR2, PRDX1, BRIX1, FUS, NONO, RDX, PYM1, PA2G4, EEF2, EIF2S2, EIF2S1, CCT6A, LSM8, H1F0, AGO3, CAPRIN1, FUBP1, HNRNPF, UBA1, GRB2, CALR, RPS23, GDI2, PSIP1…	564	1113	17446	2.89038	4.59104e-20
383	3.Adipose	Proteome	Positive	GOTERM_MF_DIRECT	GO:0005515~protein binding	226	37.4793	3.25486e-19	CYFIP2, APP, CYFIP1, TFRC, SMC3, RPL8, NUBP1, GLS, LGALS3, PPP4R2, CPNE1, ATP6V1E1, EPHB4, HPCAL1, KRT7, ACTN4, EWSR1, EZR, H2-D1, MACF1, DHX9, FLII, IQGAP1, RIC8A, PPP4C, FXR2, INPP5D, MAP7, SFN, APOE, CTSA, LYN, YES1, RDX, SMARCA5, STAM, SMARCA4, CCT6A, FUBP1, PPT1, REL, GRB2, CALR, ITM2B, FERMT3, ARF4, NRP1, CDKN1B, SH3KBP1, BRCA2, EEA1, IKBKB, IFIH1, PPP3CA, FTL1, RACK1, ANXA7, RAC1, RAB8A, R…	564	4092	17446	1.7084	2.72106e-16
384	3.Adipose	Proteome	Positive	GOTERM_MF_DIRECT	GO:0098641~cadherin binding involved in cell-cell adhesion	38	6.30182	2.69527e-13	ITGB1, TXNDC9, HDLBP, TWF1, SLC3A2, CAPG, IQGAP1, BZW1, CORO1B, FAM129B, SDCBP, KLC2, PRDX1, EFHD2, PACSIN2, RACK1, SFN, LRRFIP1, RPL15, CLIC1, WASF2, SNX5, SCYL1, SH3GLB1, PTPN1, RANBP1, ANXA1, HSPA5, IST1, STAT1, TMOD3, RDX, EEF2, CAPZA1, EIF3E, EZR, HSPA1A, PICALM	564	279	17446	4.21305	2.25354e-10
385	3.Adipose	Proteome	Positive	GOTERM_MF_DIRECT	GO:0003779~actin binding	41	6.79934	1.22067e-12	ITGB1, CYFIP1, MACF1, GMFB, WDR1, ARPC1B, FLII, GMFG, WAS, TWF1, CAPG, AIF1, CORO1A, CORO1B, PPP1R9B, CFL1, COTL1, PLS3, WASF2, YWHAH, ACTR3, ACTR2, GSN, TMOD3, RDX, MSN, ARPC4, ACTN4, ARPC5, MYO1E, MARCKS, FMNL1, ARPC2, ARPC3, CAPZA1, CAPZA2, HCLS1, EVL, S100A4, LCP1, EZR	564	338	17446	3.75218	1.0205e-09
386	3.Adipose	Proteome	Positive	GOTERM_MF_DIRECT	GO:0000166~nucleotide binding	115	19.0713	9.25104e-11	VARS, RTCB, GIMAP4, SMC3, EPRS, NUBP1, RAB43, STK10, RAVER1, RUVBL2, CPNE1, PIP4K2A, NUDT16, EPHB4, NSF, PDGFRB, MAP2K1, PRKCD, MTHFD1, EWSR1, NCL, MAPKAPK2, SRSF2, SNRPA, ATP6V1A, CSF1R, RAB5C, DHX9, ARL1, HTATSF1, STK4, HSP90B1, RAP1B, LYN, YES1, RAB4B, HSPA5, FUS, NONO, NEK7, SMARCA5, EEF2, DCLK1, SMARCA4, CCT6A, SYNJ1, GNAQ, HNRNPF, CDK2, UBA2, UBA1, HYOU1, ARF3, ARF4, RBM25, MCM7, IDE, CHD2,…	564	1936	17446	1.83742	7.73386e-08
387	3.Adipose	Proteome	Positive	GOTERM_MF_DIRECT	GO:0032403~protein complex binding	39	6.46766	1.19223e-10	ITGB1, CYFIP1, CD63, CLIC4, CDKN1B, TMED10, LRP1, ARPC1B, ITGB2, TWF1, CAPG, IQGAP1, ICAM1, PPP1R9B, RAP1B, NRAS, CASP8, PPP4C, PTK2B, NCKAP1L, WASF2, LYN, NSF, RIPK3, IST1, ACTN4, SMARCA4, MYO1E, SYNJ1, ARPC2, PTPRA, GNAQ, GNB2, CDK2, HCLS1, BAX, ATP6V0D1, EZR, KPNB1	564	358	17446	3.36976	9.96707e-08
388	3.Adipose	Proteome	Positive	GOTERM_MF_DIRECT	GO:0051015~actin filament binding	23	3.81426	2.37899e-10	ACTR3, CYFIP1, ACTR2, WDR1, ARPC1B, ARPC4, ACTN4, ARPC5, EEF2, AIF1, CORO1A, CORO1B, PPP1R9B, MYO1E, FMNL1, ARPC2, ARPC3, CAPZA1, CFL1, MYO18A, PLS3, LCP1, EZR	564	132	17446	5.38978	1.98884e-07
389	3.Adipose	Proteome	Positive	GOTERM_MF_DIRECT	GO:0019899~enzyme binding	36	5.97015	3.48902e-08	APP, ECM1, SNX12, PYCARD, HK3, PPP3CA, PPP3R1, LAMP1, RACK1, RPS3, COTL1, HMOX1, PTK2B, SNRPD3, RAC1, ABCD1, YWHAH, LYN, RFC5, PDGFRB, PTPN1, YES1, HSPA5, PRMT1, STAT1, PRKCD, CAD, EPHX1, NME2, ARPC4, IGF2R, ALOX5AP, GRB2, P4HB, KPNB1, HSPA1A	564	384	17446	2.89993	2.91678e-05
390	3.Adipose	Proteome	Positive	GOTERM_MF_DIRECT	GO:0042803~protein homodimerization activity	53	8.78939	1.1665e-06	TFRC, SPPL2A, CISD2, IDE, ELAVL1, PYCARD, IKBKB, EEA1, STK10, RUVBL2, CPNE1, RACK1, NUDT16, LRRFIP1, ABCD1, SH3GLB1, TPD52, ANXA1, PCYT1A, ACTN4, COMMD1, NRBP1, RABEP1, ERP29, SQSTM1, PRPS2, C1QB, CSF1R, PDXK, TSG101, NPR3, STK4, CORO1A, FBLN5, SDCBP, PRDX4, FXR2, PRDX1, HMOX1, APOE, BAK1, SRGAP2, SNX6, STAT1, TXNRD1, RDX, PML, GGCT, XPNPEP1, ALOX5AP, BAX, GLA, NECTIN2	564	798	17446	2.05442	0.000974716
391	3.Adipose	Proteome	Positive	GOTERM_MF_DIRECT	GO:0003723~RNA binding	52	8.62355	1.35229e-06	RBM25, HDLBP, RPL10A, RPL8, EPRS, ELAVL1, IFIH1, RBM3, RAVER1, SNRPD1, RPS18, SNRPD3, NUDT16, RPS11, NCBP1, THOC6, SFPQ, HNRNPH1, EWSR1, NCL, SRSF2, SNRPG, SNRPF, SNRPA, RNASEL, CNP, DHX9, DDX21, HTATSF1, SAMHD1, PRPF8, HSP90B1, EXOSC6, EXOSC4, FXR2, PABPN1, TRA2A, RPS3, BRIX1, RBBP7, NONO, CPSF2, PA2G4, EEF2, EIF2S1, LSM8, AGO3, SYNJ1, FUBP1, HNRNPF, IMPDH2, CAPRIN1	564	780	17446	2.06217	0.00112987
392	3.Adipose	Proteome	Positive	GOTERM_MF_DIRECT	GO:0042802~identical protein binding	44	7.29685	2.6396e-06	PRPS2, APP, TFRC, WAS, STK4, CORO1A, CORO1B, PYCARD, SDCBP, STK10, LMAN1, FTL1, FXR2, CASP8, PRRC1, RUVBL2, PACSIN2, NUDT16, APOE, BAK1, CCT7, ABCD1, APPL1, SH3GLB1, CPT1A, RIPK3, PRMT1, STAT1, ANXA4, NONO, CAD, SORD, COMMD1, IGF2R, ASS1, NCL, BAX, GRB2, S100A4, LCP1, ANGPTL4, SQSTM1, NECTIN2, PICALM	564	625	17446	2.17766	0.00220427
393	3.Adipose	Proteome	Positive	GOTERM_MF_DIRECT	GO:0017124~SH3 domain binding	16	2.6534	6.00966e-06	LYN, SH3KBP1, WAS, ARHGAP17, SYNJ1, INPP5D, ELMO1, CCDC6, ADAM9, HCLS1, SIRPA, GRB2, PTPN6, EVL, OSTF1, PICALM	564	118	17446	4.19425	0.00501149
394	3.Adipose	Proteome	Positive	GOTERM_MF_DIRECT	GO:0003924~GTPase activity	21	3.48259	1.50148e-05	RALA, RALB, RAB5C, ARL1, RHOG, GNAI3, TBCC, TUBG1, EEF2, GNAI2, RAB43, RAP1B, DNM3, NRAS, GNG2, GNB2, GNAQ, RAC2, RAC1, GBP4, RAB8A	564	209	17446	3.10806	0.012474
395	3.Adipose	Proteome	Positive	GOTERM_MF_DIRECT	GO:0003756~protein disulfide isomerase activity	7	1.16086	2.89646e-05	PDIA3, ERP44, TMX3, TMX1, P4HB, PDIA6, PDIA4	564	20	17446	10.8264	0.0239239
396	3.Adipose	Proteome	Positive	GOTERM_MF_DIRECT	GO:0019901~protein kinase binding	32	5.3068	3.315e-05	ITGB1, RGS19, MVP, ITGB2, WAS, ATP1A1, IQGAP1, ELAVL1, IKBKB, RPS18, RPS3, SFN, RAC1, RAB8A, NSF, PDGFRB, PTPN1, MAP2K1, SYK, PRKCD, MSN, EEF2, DNAJC3, PTPRC, CCNY, JTB, HCLS1, GRB2, PTPN6, ARHGEF7, SQSTM1, CD44	564	434	17446	2.28075	0.0273333
397	3.Adipose	Proteome	Positive	KEGG_PATHWAY	mmu04666:Fc gamma R-mediated phagocytosis	21	3.48259	4.4075e-10	LYN, MAP2K1, GSN, SYK, ARPC1B, PRKCD, WAS, ARPC4, ARPC5, VAV1, HCK, MARCKS, PTPRC, ARPC2, ARPC3, INPP5D, CFL1, RAC2, RAC1, DOCK2, WASF2	344	84	7691	5.58939	1.07984e-07
398	3.Adipose	Proteome	Positive	KEGG_PATHWAY	mmu04145:Phagosome	28	4.64345	7.21445e-09	ITGB1, ATP6V1A, RAB5C, ITGAM, TFRC, ITGB2, H2-Q7, NCF4, H2-K1, CORO1A, CTSS, EEA1, MRC2, SEC61A1, LAMP1, ATP6V1H, RAC1, SEC61B, ATP6V1E1, ATP6V1D, ATP6V1F, M6PR, H2-AA, FCGR4, ATP6V1B2, CALR, ATP6V0D1, H2-D1	344	171	7691	3.66089	1.76754e-06
399	3.Adipose	Proteome	Positive	KEGG_PATHWAY	mmu04810:Regulation of actin cytoskeleton	31	5.14096	1.61366e-08	CYFIP2, ITGB1, CYFIP1, ITGAM, ARPC1B, ITGB2, WAS, IQGAP1, NRAS, CFL1, RAC2, PIP4K2A, NCKAP1L, RAC1, WASF2, PDGFRB, MAP2K1, GSN, RDX, MSN, ARPC4, ACTN4, ARPC5, GNG12, VAV1, ITGAD, ARPC2, ARPC3, ARHGEF1, EZR, ARHGEF7	344	213	7691	3.25392	3.95346e-06
400	3.Adipose	Proteome	Positive	KEGG_PATHWAY	mmu04141:Protein processing in endoplasmic reticulum	27	4.47761	2.12641e-08	RRBP1, HSP90B1, LMAN1, SEC61A1, GANAB, SEC61B, BAK1, SEC62, SIL1, SEC23B, UBQLN2, PDIA3, HSPA5, RAD23A, MOGS, EIF2S1, PDIA6, CKAP4, PDIA4, DNAJC3, DNAJB11, ERP29, BAX, HYOU1, P4HB, CALR, HSPA1A	344	168	7691	3.59318	5.20968e-06
401	3.Adipose	Proteome	Positive	KEGG_PATHWAY	mmu04144:Endocytosis	32	5.3068	4.88994e-07	ARF3, TSG101, RAB5C, TFRC, SH3KBP1, ARPC1B, H2-Q7, H2-K1, CLTB, WAS, SNX12, CLTA, EEA1, RAB8A, SNX5, SNX6, SH3GLB1, IST1, ARPC4, STAM, ARPC5, IGF2R, PML, DNM3, RABEP1, ARPC2, ARPC3, CAPZA1, CAPZA2, ARF5, H2-D1, HSPA1A	344	261	7691	2.74116	0.000119796
402	3.Adipose	Proteome	Positive	KEGG_PATHWAY	mmu05152:Tuberculosis	24	3.9801	3.03773e-06	CD74, FCER1G, RAB5C, ITGAM, SYK, STAT1, ITGB2, H2-AA, CORO1A, CTSS, EEA1, MRC2, PPP3CA, PPP3R1, CASP8, LAMP1, FCGR4, ATP6V1H, BAX, ATP6V0D1, CALM1, BID, CTSD, CAMP	344	176	7691	3.04876	0.000743968
403	3.Adipose	Proteome	Positive	KEGG_PATHWAY	mmu05100:Bacterial invasion of epithelial cells	15	2.48756	7.20218e-06	ITGB1, ARPC1B, WAS, CLTB, RHOG, CLTA, ARPC4, ARPC5, DNM3, ARPC2, ARPC3, ELMO1, HCLS1, RAC1, WASF2	344	78	7691	4.29953	0.00176298
404	3.Adipose	Proteome	Positive	KEGG_PATHWAY	mmu04142:Lysosome	18	2.98507	2.60653e-05	CTSA, CD63, CTSZ, CLTB, M6PR, CLTA, IGF2R, CTSS, AP3M1, LAMP1, PSAP, PPT1, ATP6V1H, CTSF, CD68, ATP6V0D1, CTSD, GLA	344	122	7691	3.29866	0.00636574
405	3.Adipose	Proteome	Positive	KEGG_PATHWAY	mmu05132:Salmonella infection	14	2.32172	3.49625e-05	ARPC1B, WAS, RHOG, ARPC4, ARPC5, KLC1, PYCARD, KLC2, ARPC2, ARPC3, CASP1, RAC1, PKN1, WASF2	344	78	7691	4.0129	0.00852938
406	3.Adipose	Proteome	Positive	KEGG_PATHWAY	mmu04662:B cell receptor signaling pathway	13	2.15589	5.24464e-05	LYN, MAP2K1, SYK, VAV1, IKBKB, PPP3CA, NRAS, PPP3R1, INPP5D, RAC2, GRB2, PTPN6, RAC1	344	70	7691	4.15212	0.0127675
407	3.Adipose	Proteome	Positive	KEGG_PATHWAY	mmu04650:Natural killer cell mediated cytotoxicity	16	2.6534	5.79713e-05	MAP2K1, FCER1G, SYK, ITGB2, VAV1, ICAM1, PPP3CA, NRAS, PPP3R1, FCGR4, RAC2, PTK2B, GRB2, PTPN6, RAC1, BID	344	105	7691	3.40687	0.014103
408	3.Adipose	Proteome	Positive	UP_TISSUE	Bone marrow	165	27.3632	1.79094e-41	SLC35B2, CD82, GMFG, NCF4, H2-K1, PLOD1, RPL10A, BZW1, ICAM1, PYCARD, LGALS3, RPS18, COTL1, CPNE1, TRAPPC13, OSTF1, RPS11, CPT1A, IST1, CYBB, MOGS, ACTN4, PDIA6, PDIA4, TMX1, EWSR1, SUB1, SRSF2, CHIL3, ATP6V1A, TSG101, LXN, TMED10, ABHD4, C5AR1, TWF1, PLD4, ARHGAP17, PTTG1IP, CORO1A, PLD3, CORO1B, HSP90B1, SDCBP, PRDX4, PRDX1, UAP1L1, PSAP, HMOX1, ATP6V1H, NCKAP1L, APOE, ATP6V1D, PLTP, HMOX2, ATP…	597	1981	22371	3.12112	3.34906e-39
409	3.Adipose	Proteome	Positive	UP_TISSUE	Liver	208	34.4942	6.29707e-21	APP, SLC35B2, GMFG, SMC3, RPL8, IFI30, AQP1, C4B, PSMD9, RAVER1, PPP4R2, WDR91, CPNE1, CPNE3, SEC62, CPT1A, EML4, MTHFD1, SOAT1, CCNY, FAR1, RPL28, H2-D1, MACF1, FLII, PTTG1IP, HTATSF1, RIC8A, PRPSAP1, HPX, PRDX4, FXR2, PRDX1, MUG1, MAP7, APOE, SNX5, FIS1, RDX, SMARCA5, PA2G4, DERA, STAG1, VNN1, EIF6, CWF19L1, PPT1, CALR, CALM1, CDKN1B, RPLP1, CTSZ, GDI2, CLTA, MIA3, PFAS, WDR44, IFIH1, FTL1, NUD…	597	4216	22371	1.84873	1.17755e-18
410	3.Adipose	Proteome	Positive	UP_TISSUE	Macrophage	68	11.2769	2.89511e-20	ITGB1, RBM25, SH3KBP1, CETN2, RPLP1, RTCB, PSIP1, NOC2L, LMNB1, RAB43, LGALS3, RAVER1, RPLP2, OSTF1, CLCC1, SEC62, NUP210, PRKCD, PARP9, PDIA6, APBB1IP, HCK, CCNY, TMX1, NCL, ATP6V1B2, TAX1BP1, EVL, CHIL3, ARHGEF7, SQSTM1, CD44, H2-D1, C1QB, MACF1, CSF1R, LRP1, CSTF3, C5AR1, AKAP8, WAS, DDX21, SLC3A2, IQGAP1, SAMHD1, CORO1A, FXR2, GPNMB, INPP5D, PTK2B, LYN, CD74, CPSF2, SMARCA5, ERBIN, M6PR, TRPV…	597	689	22371	3.69829	5.41385e-18
411	3.Adipose	Proteome	Positive	UP_TISSUE	Mammary gland	147	24.3781	2.72373e-16	CYFIP1, RNH1, NCF4, AUP1, EPRS, BZW1, NUBP1, AQP1, RAVER1, SNRPD1, EPHB4, SH3GLB1, TPD52, CPT1A, CYBB, KRT7, MOGS, RPSA, ACTN4, NRBP1, TMX1, NCL, SUB1, SRSF2, SNRPG, JTB, ADAM9, S100A4, EZR, S100A9, SQSTM1, SNRPA, TSG101, ARL1, TWF1, FBLN5, PRDX4, PRDX1, MAP7, PACSIN2, ATP6V1D, HMOX2, VAT1, LYN, YES1, NONO, SMARCA5, TRPV2, M6PR, MT2, ARPC4, STAM, ARPC5, EEF2, GNG12, EIF2S2, BRI3BP, HNRNPF, CDK2, …	597	2791	22371	1.97364	4.15223e-14
412	3.Adipose	Proteome	Positive	UP_TISSUE	Thymus	155	25.7048	3.78431e-15	TFRC, HDLBP, PLOD3, RPL8, RPL10A, EPRS, BZW1, ICAM1, PYCARD, STK10, COL4A3BP, RAVER1, RPS18, CFL1, PIP4K2A, CLCC1, NUDT16, SEC62, NSF, TPD52, PDIA3, NUP210, IST1, RPSA, MTHFD1, NCL, SRSF2, SNRPG, JTB, ATP6V0D1, KPNB1, FAIM, FKBP5, MACF1, TXNDC9, CNP, DHX9, ARL1, PLD4, PTTG1IP, IQGAP1, HSP90B1, RAP1B, SDCBP, PSAP, NCKAP1L, SNX5, SLC37A2, H3F3C, RDX, NEK7, SMARCA5, MSN, ARPC4, EEF2, ARHGAP25, IGF2R…	597	3108	22371	1.8688	7.0588e-13
413	3.Adipose	Proteome	Positive	UP_TISSUE	Placenta	68	11.2769	2.02446e-14	ITGB1, APP, RTCB, GDI2, CLTB, USP39, SEC61A1, SNRPD1, SUMO2, FLOT1, PGM3, SIRPA, PLS3, ANXA7, OSTF1, ATP6V1E1, CTSD, SCYL1, TPD52, MAP2K1, SUN1, ANXA1, TMOD3, ANXA4, AKR1A1, COMMD3, P3H1, PDIA6, DNAJC3, PSMA1, CRYZL1, TAX1BP1, FAR1, PSMD10, CSF1R, RAB5C, GNAI3, SRI, HTATSF1, HSPA14, HSP90B1, GNAI2, TM9SF3, RAP1B, PSAP, RBBP7, CCT7, RPS27A, SEC23B, SLC25A24, YES1, NONO, YIPF5, M6PR, GNG12, DERA, C…	597	893	22371	2.85344	3.77853e-12
414	3.Adipose	Proteome	Positive	UP_TISSUE	Amnion	38	6.30182	3.56055e-10	CYFIP1, CD63, NUMA1, CD82, FAM45A, WBP2, SNX12, CAPG, SRI, HSP90B1, SDCBP, PSMD9, FTL1, AMDHD2, LMNA, UAP1L1, EFHD2, MTA2, MEST, RAB8A, ACTR3, TPD52, GSN, NONO, PRKCD, HSD3B1, TXNL1, RDX, KRT7, ARPC5, GDAP2, PDIA4, CCT6A, ATP6V1B2, UBA2, P4HB, EZR, CALM1	597	427	22371	3.33478	6.65824e-08
415	3.Adipose	Proteome	Positive	UP_TISSUE	Hippocampus	74	12.272	8.49891e-09	APP, WDR1, GDI2, IL1RAP, BRCA2, PPP3CA, FTL1, STAB1, CFL1, RACK1, COTL1, PIP4K2A, ATP6V1E1, COLGALT1, APPL1, YWHAH, ACTR3, NSF, TPD52, PDIA3, MAP2K1, ANXA5, COMMD2, NME2, AKR1A1, KRT7, RPSA, TUBG1, SFPQ, PSMA1, MTHFD1, HNRNPH1, NCL, SNRPG, ATP6V1B2, ERP29, EZR, PRPS2, ATP6V1A, PDXK, GRN, CNP, ATP1A2, ATP1A1, CORO1A, CORO1B, PPP3R1, PRDX1, PTK2B, SFN, CCT7, CCT5, RPL19, ATP6V1F, SNX6, FIS1, HSPA5,…	597	1359	22371	2.04044	1.58929e-06
416	3.Adipose	Proteome	Positive	UP_TISSUE	Activated spleen	46	7.62852	3.57116e-08	GLTP, RNASEL, CLIC4, RAB5C, WDR1, SH3KBP1, ARPC1B, MOSPD2, PLOD2, SLC3A2, AUP1, IFI30, CORO1A, ICAM1, IKBKB, IFIH1, C4B, FXR2, EXOSC4, LAMP1, DPP8, TRA2A, COTL1, NANS, WASF2, OSBPL9, PTPN1, STAT1, RDX, CD180, SMARCA5, BGN, MSN, MOGS, VAV1, SCAMP2, AGO3, ITGAD, PPT1, CAMK1, LCP1, EZR, NECTIN2, FAIM, HSPA1A, ENGASE	597	690	22371	2.49816	6.67804e-06
417	3.Adipose	Proteome	Positive	UP_TISSUE	Kidney	127	21.0614	1.57141e-07	CYFIP2, APP, RNH1, GMFG, H2-K1, SMC3, PSMD9, PSMD6, RPS18, SVEP1, CPNE3, OSTF1, EPHB4, NUP210, TMOD3, KRT7, RPSA, THOC6, SCAMP2, FOLH1, CCNY, BOLA2, ERP29, EZR, RPL28, FKBP5, RAB5C, TXNDC9, DHX9, FLII, SLC38A10, ARHGAP17, HTATSF1, GLG1, HSP90B1, RAP1B, SDCBP, TMEM245, PRDX1, UAP1L1, PSAP, MAP7, HMOX1, FIS1, HSPA5, H3F3C, TBCC, MT2, TBCB, ARPC4, MT1, STAM, EEF2, EIF2S1, SMARCA4, CCT6A, VNN1, EIF6,…	597	3029	22371	1.57114	2.9385e-05
418	3.Adipose	Proteome	Positive	UP_TISSUE	Mast cell	27	4.47761	1.64439e-07	ITGB1, TFRC, WAS, KLC1, STK4, RPL10A, MTMR6, NUDCD2, INPP5D, CFL1, PTK2B, CLIC1, LYN, YES1, FCER1G, SYK, PRKCD, RDX, ERBIN, MSN, TBCB, VAV1, ARPC3, PTPRA, HCLS1, PTPN6, UBA1	597	301	22371	3.36131	3.07496e-05
419	3.Adipose	Proteome	Positive	UP_TISSUE	Mammary tumor	126	20.8955	6.56176e-06	APP, SLC35B2, FAM49B, RNH1, RTCB, SPPL2A, CISD2, GIMAP4, EPRS, BZW1, IPO7, AQP1, PYCARD, ABHD12, HERC4, PPP4R2, WDR91, CPNE1, PIP4K2A, PLS3, SVEP1, CLCC1, FAM3C, TRAPPC13, SBF1, ATP6V1E1, SIL1, NSF, PDIA3, HPCAL1, P3H1, KRT7, RPSA, PDIA6, TMX3, CCNY, CRYZL1, DNAJB11, ELMO1, FAR1, S100A4, ATP6V1A, TMED10, CNP, CSTF3, TWF1, PLD4, ARHGAP17, PTTG1IP, PRPF8, CORO1A, MTMR6, RIC8A, RAP1B, EBP, PPP4C, PR…	597	3220	22371	1.46631	0.0012263
420	3.Adipose	Proteome	Positive	UP_TISSUE	Lung	73	12.1061	2.25484e-05	APP, WDR1, SH3KBP1, DOCK8, CTSZ, PLOD3, SMC3, BZW1, IKBKB, LGALS3, LAMP1, HEPH, NNT, FLOT1, TMED3, FLOT2, SNRPD3, OSTF1, EPHB4, ACTR3, NSF, MAP2K1, CAMK1D, SYK, PRMT1, SORD, PDIA6, EML4, NCL, MAPKAPK2, AGPS, ERP29, TAX1BP1, ADAM9, CHIL3, DAGLB, ARHGEF7, KPNB1, CD44, PDXK, WBP2, C5AR1, NPR3, AKAP8, GNAI3, FBLN5, GLG1, HSP90B1, AP3M1, NRAS, LMNA, UAP1L1, PTPN1, SLC37A2, RAB4B, YES1, HSPA5, STAT1, N…	597	1647	22371	1.66089	0.00420772
421	3.Adipose	Proteome	Positive	UP_TISSUE	B-cell	16	2.6534	3.22963e-05	RANBP1, SH3KBP1, RPLP1, TMOD3, SMARCA5, MSN, PSIP1, IL16, SSRP1, PRPF8, MARCKS, DPP8, HNRNPH1, RPLP2, LCP1, OSTF1	597	163	22371	3.67827	0.0060213
422	3.Adipose	Proteome	Positive	UP_TISSUE	Fibroblast	12	1.99005	4.51257e-05	PDGFRB, PDIA3, MARCKS, TSG101, GSN, HSPA5, BGN, P3H1, HMOX1, IL1RAP, CALR, FBLN2	597	95	22371	4.73335	0.00840319
423	3.Adipose	Proteome	Positive	UP_TISSUE	Heart	58	9.61857	9.64181e-05	ITGB1, ARF4, FEN1, ITGAM, SH3KBP1, ARPC1B, MTR, PPP1R9B, NNT, PGM3, ANXA7, SLC39A7, OSTF1, CTSD, RAB8B, YWHAH, ACTR3, MAP2K1, CPT1A, PRMT1, TMOD3, ANXA4, NME2, AKR1A1, COMMD7, EML4, SOAT1, ASPH, NCL, ATP6V1B2, MCM3, S100A4, CHIL3, KPNB1, TSG101, GNAI3, ATP1A2, IQGAP1, SRI, LMF2, HSP90B1, FAM129B, SDCBP, SFN, RBBP7, RPS27A, MEST, HSD3B6, SLC37A2, GSN, SMARCA5, SSRP1, DERA, CCT6A, P4HA2, NAT2, CAPZ…	597	1276	22371	1.70329	0.0178695
424	3.Adipose	Proteome	Positive	UP_TISSUE	Mammary tumor. C3	34	5.63847	0.00019331	CSF1R, FEN1, NUMA1, H2-K1, SLC38A10, ATP1A1, IQGAP1, IDE, HSP90B1, AP3M1, KLC2, ANXA7, NCKAP1L, RPS27A, SEC62, UBXN4, SEC11A, EPHB4, LYN, RFC5, OSBPL9, NAA10, IST1, ANXA4, PA2G4, H2-AA, SMARCA4, CCT6A, XPNPEP1, HNRNPF, FUBP1, PLXNB2, NAA15, UMPS	597	630	22371	2.02232	0.0355067
425	3.Adipose	Proteome	Positive	UP_TISSUE	Spleen	54	8.95522	0.000301845	FAM49B, ITGAM, WDR1, RTCB, GDI2, H2-K1, ELAVL1, NUBP1, CTSS, AQP1, IKBKB, DOCK11, MYO18A, RACK1, NUP210, SYK, RHOG, COMMD2, RPSA, IL16, VAV1, HCK, ASPH, HNRNPH1, RASA4, NCL, ARHGEF1, S100A4, PTMA, S100A9, BLVRA, H2-D1, RALA, H2-Q7, CLEC16A, CORO1A, INPP5D, UAP1L1, PACSIN2, RPS3, SRGAP2, CD74, GSN, STAT1, TRPV2, EEF2, H2-AA, PML, ARPC3, IMPDH2, REL, HYOU1, CLEC2D, CC2D1B	597	1214	22371	1.66681	0.0548896
426	4.Liver_CDonly	RNA-seq	Negative	GOTERM_BP_DIRECT	GO:0006412~translation	25	12.0773	1.32856e-13	MRPS14, RPL8, MRPL34, YARS2, RPS4X, RPL7A, RPS17, RPL38, RPS2, RPL21, RPL23A, MRPL23, EEF1G, MRPL52, RPS26, SLC25A38, RPS27, RPL37A, RPL24, KXD1, TARS2, FAU, RPL28, UBA52, RPS21	161	401	18082	7.00191	8.55835e-11
427	4.Liver_CDonly	RNA-seq	Negative	GOTERM_BP_DIRECT	GO:0055114~oxidation-reduction process	22	10.628	5.69903e-07	CYB5A, CBR1, NDUFB11, NDUFB5, BCKDHB, IDH2, SORD, UQCR11, NDUFC1, TXN2, DHODH, CYP39A1, HSD11B1, PRDX2, ALKBH2, IVD, CREG1, MTHFD2L, NDUFS3, NDUFS2, CYC1, NDUFV3	161	676	18082	3.65508	0.00036695
428	4.Liver_CDonly	RNA-seq	Negative	GOTERM_CC_DIRECT	GO:0005840~ribosome	24	11.5942	1.76787e-19	RPL21, MRPS14, RPLP1, RPL23A, MRPL34, RPL8, MRPL23, MRPL52, RPS4X, RPS26, RPL7A, RPS17, RPS27, RPL37A, RPL24, KXD1, RPLP2, RPL38, RPS2, FAU, RPL28, UBA52, RPS21, RPS10	182	188	19662	13.7914	3.27056e-17
429	4.Liver_CDonly	RNA-seq	Negative	GOTERM_CC_DIRECT	GO:0005739~mitochondrion	56	27.0531	4.77443e-17	MRPS14, ACSM4, ATP5G2, MRPL34, ATP5G1, YARS2, D10JHU81E, CISD3, TXN2, RFK, CDK5RAP1, NEFH, CHCHD1, COX8A, MYOC, CMC2, BCKDHB, SORD, NDUFC1, QTRT1, MRPL52, IVD, MTHFD2L, TMEM126A, NDUFS3, NDUFS2, JTB, MTFR1, TARS2, GGNBP1, NDUFB11, NDUFB5, NDUFB4, ATP5K, UQCR11, COX7A2, MIEF2, PHB, ATP5O, TIMM50, 2410015M20RIK, PRDX2, CECR5, BAG1, CYC1, NDUFV3, MPDU1, CYB5A, TRMT10C, IDH2, CHCHD10, MRPL23, DHODH, …	182	1721	19662	3.51531	8.8327e-15
430	4.Liver_CDonly	RNA-seq	Negative	GOTERM_CC_DIRECT	GO:0005743~mitochondrial inner membrane	26	12.5604	1.98275e-14	NDUFB11, NDUFB5, NDUFB4, ATP5K, COX7A2, UQCR11, PHB, ATP5O, ATP5G1, TIMM50, 2410015M20RIK, CYC1, NDUFV3, COX8A, MYOC, BCKDHB, IDH2, NDUFC1, COQ5, DHODH, SLC25A38, TMEM256, MTHFD2L, TMEM126A, NDUFS3, NDUFS2	182	387	19662	7.25803	3.6765e-12
431	4.Liver_CDonly	RNA-seq	Negative	GOTERM_CC_DIRECT	GO:0030529~intracellular ribonucleoprotein complex	19	9.17874	1.03025e-09	RPL21, MRPS14, RPLP1, RPL23A, MRPL34, RPL8, MRPL23, MRPL52, RPS4X, RPL7A, RPS17, RPL37A, RPL24, RPLP2, RPL38, RPS2, RPL28, RPS21, RPS10	182	320	19662	6.41446	1.90596e-07
432	4.Liver_CDonly	RNA-seq	Negative	GOTERM_CC_DIRECT	GO:0022625~cytosolic large ribosomal subunit	11	5.31401	1.14938e-08	RPL7A, RPL21, RPLP1, RPL37A, RPL24, RPLP2, RPL23A, RPL38, RPL8, RPL28, UBA52	182	91	19662	13.0589	2.12635e-06
433	4.Liver_CDonly	RNA-seq	Negative	GOTERM_CC_DIRECT	GO:0022627~cytosolic small ribosomal subunit	8	3.86473	5.3787e-07	RPS4X, RPS26, RPS17, RPS27, RPS2, FAU, RPS21, RPS10	182	53	19662	16.3069	9.95011e-05
434	4.Liver_CDonly	RNA-seq	Negative	GOTERM_CC_DIRECT	GO:0070469~respiratory chain	8	3.86473	1.00933e-06	NDUFB11, NDUFB5, NDUFS3, NDUFS2, UQCR11, NDUFC1, NDUFV3, CYC1	182	58	19662	14.9011	0.000186708
435	4.Liver_CDonly	RNA-seq	Negative	GOTERM_CC_DIRECT	GO:0005747~mitochondrial respiratory chain complex I	7	3.38164	4.39647e-06	NDUFB11, NDUFB5, NDUFB4, NDUFS3, NDUFS2, NDUFC1, NDUFV3	182	47	19662	16.09	0.000813018
436	4.Liver_CDonly	RNA-seq	Negative	GOTERM_CC_DIRECT	GO:0015935~small ribosomal subunit	5	2.41546	0.000137812	RPS4X, RPS26, RPS2, FAU, RPS21	182	29	19662	18.6264	0.0251747
437	4.Liver_CDonly	RNA-seq	Negative	GOTERM_CC_DIRECT	GO:0000276~mitochondrial proton-transporting ATP synthase complex, coupling factor F(o)	4	1.93237	0.000158789	ATP5K, ATP5O, ATP5G2, ATP5G1	182	12	19662	36.011	0.028951
438	4.Liver_CDonly	RNA-seq	Negative	GOTERM_MF_DIRECT	GO:0003735~structural constituent of ribosome	24	11.5942	1.01276e-16	RPL21, MRPS14, RPLP1, RPL23A, MRPL34, RPL8, MRPL23, MRPL52, RPS4X, RPS26, SLC25A38, RPS17, RPS27, RPL37A, RPL24, KXD1, RPLP2, RPL38, RPS2, FAU, RPL28, UBA52, RPS21, RPS10	154	264	17446	10.2987	3.10862e-14
439	4.Liver_CDonly	RNA-seq	Negative	GOTERM_MF_DIRECT	GO:0070180~large ribosomal subunit rRNA binding	5	2.41546	5.31684e-06	RPLP1, RPL37A, MRTO4, RPLP2, RPL23A	154	14	17446	40.4592	0.00148761
440	4.Liver_CDonly	RNA-seq	Negative	GOTERM_MF_DIRECT	GO:0004027~alcohol sulfotransferase activity	4	1.93237	2.25597e-05	SULT2A5, SULT2A4, SULT2A3, SULT2A1	154	7	17446	64.7347	0.00629688
441	4.Liver_CDonly	RNA-seq	Negative	GOTERM_MF_DIRECT	GO:0050656~3'-phosphoadenosine 5'-phosphosulfate binding	4	1.93237	2.25597e-05	SULT2A5, SULT2A4, SULT2A3, SULT2A1	154	7	17446	64.7347	0.00629688
442	4.Liver_CDonly	RNA-seq	Negative	GOTERM_MF_DIRECT	GO:0008144~drug binding	8	3.86473	5.83514e-05	GLRB, GSTA4, SULT2A5, ATP5O, SULT2A4, SULT2A3, SULT2A1, DHODH	154	112	17446	8.09184	0.0162061
443	4.Liver_CDonly	RNA-seq	Negative	GOTERM_MF_DIRECT	GO:0044822~poly(A) RNA binding	24	11.5942	0.000106108	TRMT10C, RPS19BP1, RPL21, MRPS14, ZC3H8, RPL8, YARS2, RPS4X, RPS26, RPL7A, RPS17, RPL37A, MRTO4, RPL24, HIST1H4H, RPS2, NDUFV3, FAU, NOL12, RPL28, CHCHD1, RPS21, RPS10, HOXB6	154	1113	17446	2.44282	0.0292748
444	4.Liver_CDonly	RNA-seq	Negative	KEGG_PATHWAY	mmu03010:Ribosome	22	10.628	1.21136e-18	RPL21, MRPS14, RPLP1, RPL23A, MRPL34, RPL8, MRPL23, RPS4X, RPS26, RPL7A, RPS17, RPS27, RPL37A, RPL24, RPLP2, RPL38, RPS2, FAU, RPL28, UBA52, RPS21, RPS10	84	145	7691	13.8918	1.12656e-16
445	4.Liver_CDonly	RNA-seq	Negative	KEGG_PATHWAY	mmu00190:Oxidative phosphorylation	15	7.24638	1.87198e-10	COX8A, NDUFB11, NDUFB5, NDUFB4, ATP5K, COX7A2, UQCR11, NDUFC1, ATP5G2, ATP5O, ATP5G1, NDUFS3, NDUFS2, CYC1, NDUFV3	84	139	7691	9.88052	1.74094e-08
446	4.Liver_CDonly	RNA-seq	Negative	KEGG_PATHWAY	mmu05012:Parkinson's disease	14	6.76329	5.28156e-09	COX8A, NDUFB11, NDUFB5, NDUFB4, COX7A2, UQCR11, NDUFC1, ATP5G2, ATP5O, ATP5G1, NDUFS3, NDUFS2, CYC1, NDUFV3	84	149	7691	8.60291	4.91185e-07
447	4.Liver_CDonly	RNA-seq	Negative	KEGG_PATHWAY	mmu05010:Alzheimer's disease	14	6.76329	4.25003e-08	COX8A, NDUFB11, NDUFB5, NDUFB4, COX7A2, UQCR11, NDUFC1, ATP5G2, ATP5O, ATP5G1, NDUFS3, NDUFS2, CYC1, NDUFV3	84	177	7691	7.242	3.95252e-06
448	4.Liver_CDonly	RNA-seq	Negative	KEGG_PATHWAY	mmu05016:Huntington's disease	14	6.76329	1.59995e-07	COX8A, NDUFB11, NDUFB5, NDUFB4, COX7A2, UQCR11, NDUFC1, ATP5G2, ATP5O, ATP5G1, NDUFS3, NDUFS2, CYC1, NDUFV3	84	198	7691	6.47391	1.48795e-05
449	4.Liver_CDonly	RNA-seq	Negative	KEGG_PATHWAY	mmu04932:Non-alcoholic fatty liver disease (NAFLD)	12	5.7971	8.22304e-07	COX8A, NDUFB11, NDUFB5, NDUFB4, NDUFS3, NDUFS2, COX7A2, UQCR11, NDUFC1, NDUFV3, CYC1, ATF4	84	157	7691	6.99818	7.64713e-05
450	4.Liver_CDonly	RNA-seq	Negative	KEGG_PATHWAY	mmu01100:Metabolic pathways	28	13.5266	0.000233197	GALNT11, NDUFB11, NDUFB5, NDUFB4, ATP5K, UQCR11, ACSM4, ATP5G2, ATP5O, ATP5G1, HSD11B1, NT5E, RFK, CYC1, NDUFV3, COX8A, CBR1, BCKDHB, IDH2, SORD, NDUFC1, COQ5, DHODH, CYP2A5, IVD, MTHFD2L, NDUFS3, NDUFS2	84	1269	7691	2.02023	0.0214563
451	4.Liver_CDonly	RNA-seq	Negative	KEGG_PATHWAY	mmu00980:Metabolism of xenobiotics by cytochrome P450	6	2.89855	0.000600129	HSD11B1, CBR1, GSTA4, MGST3, SULT2A3, SULT2A1	84	64	7691	8.58371	0.054299
452	4.Liver_CDonly	RNA-seq	Negative	Kidney	58	28.0193	8.55912e-10	GALNT11, ATP5G2, MRPL34, D10JHU81E, TXN2, RPS4X, RDM1, RPL7A, CD1D2, TRMT112, KRTCAP2, RPS17, RFK, RPL38, RPS10, COX8A, BC089597, RPL21, CMC2, SORD, NDUFC1, MIF, EEF1G, CYP2A5, SLC22A29, IVD, RPL37A, NDUFS3, RPL24, KXD1, UBA52, RPL28, HOXB6, GGNBP1, NDUFB4, GLO1, UQCR11, PHB, NT5E, CECR5, CREG1, GM14308, SPP2, EMC6, RPS2, CYC1, E2F6, EVC2, CYB5A, PCP4L1, CHCHD10, RPL23A, CWC15, RPS26, SLC25A38, G…	186	3029	22371	2.30304	8.64471e-08
453	4.Liver_CDonly	RNA-seq	Negative	Liver	59	28.5024	2.93179e-05	RPLP1, ATN1, RPL8, ATP5G1, D10JHU81E, ASGR1, TXN2, RPS4X, RDM1, RPL7A, TRMT112, RPS17, RPLP2, RPL38, RPS10, SULT2A1, COX8A, SORD, PDRG1, GCHFR, CYP39A1, CYP2A5, CLDN14, IVD, KXD1, MTFR1, UBA52, RPL28, HAMP2, RNASEK, RPS19BP1, NDUFB4, GLO1, ATP5K, COX7A2, ATP5O, HSD11B1, PRDX2, CREG1, GM14308, EMC6, RPS2, EIF3J1, E2F6, DTD1, MPDU1, CBX8, CYB5A, TRMT10C, PSG26, IDH2, RPL23A, MRPL23, COQ5, GNPTG, GS…	186	4216	22371	1.68315	0.00295677
454	4.Liver_CDonly	RNA-seq	Negative	Small intestine	16	7.72947	0.000136962	COX8A, RPL21, NDUFB11, MGST3, ATP5G1, TIMM50, RPS26, GCHFR, PRDX2, GNPTG, GSTA4, RFK, KXD1, MTFR1, FAU, UBA52	186	596	22371	3.22884	0.0137389
455	4.Liver_CDonly	RNA-seq	Negative	Mammary gland	42	20.2899	0.000159969	RPS19BP1, NDUFB11, NDUFB4, GLO1, CREM, ATP5K, ARPP19, TIMM50, RPS4X, RPL7A, PRDX2, PLAC9B, RPL38, RPS10, DTD1, TNFSFM13, CBX8, EVC2, GRCC10, RPL21, 1500011B03RIK, LUM, CMC2, BCKDHB, TNFSF13, CWC15, MIF, PDRG1, DHODH, GCHFR, MRPL52, RPS27, ID2, RPL37A, HIST1H4H, RPL24, KXD1, JTB, TARS2, TMEM18, UBA52, RPS21	186	2791	22371	1.80993	0.0160283
456	4.Liver_CDonly	RNA-seq	Positive	GOTERM_BP_DIRECT	GO:0002376~immune system process	54	5.54415	8.8057e-16	PIK3CD, IL27, IFIT1, IFIT3, IFIT2, ADGRE1, C1S1, EXO1, DHX58, TNFAIP8L2, LGALS9, OASL1, OASL2, HERC6, MB21D1, GBP5, TICAM2, RSAD2, DDX58, SP110, CD180, TAP2, TAP1, FCGR1, FGR, HCK, DCSTAMP, NAIP6, OAS2, OAS3, TLR9, SH2D1B2, IRF7, TLR11, TLR8, MASP2, PRKD2, TLR7, TLR13, IDO1, CSF1R, SRC, UNC93B1, CD5L, NLRC4, PIRB, LY9, PTK2B, TNFRSF17, NLRP3, SLAMF6, GSDMD, THEMIS2, SARM1	707	383	18082	3.60597	2.24265e-12
457	4.Liver_CDonly	RNA-seq	Positive	GOTERM_BP_DIRECT	GO:0051607~defense response to virus	31	3.18275	2.19532e-12	OAS1H, SLFN8, UNC93B1, OAS1A, DDX60, IFIT1, OAS1D, OAS1E, SLFN9, IFIT3, IFIT2, OAS1G, DHX58, NLRP3, PMAIP1, ABCF3, OASL1, OASL2, MB21D1, APOBEC1, TICAM2, RSAD2, DDX58, STAT2, OAS2, OAS3, TLR9, IFIT3B, TLR8, TLR7, TRIM34A	707	167	18082	4.74758	5.54327e-09
458	4.Liver_CDonly	RNA-seq	Positive	GOTERM_BP_DIRECT	GO:0045087~innate immune response	46	4.72279	1.80493e-10	CSF1R, NLRP1A, SRC, UNC93B1, OAS1A, PIK3CD, IL27, NLRC4, IFIT1, LY9, IFIT3, IFIT2, C1S1, DHX58, NLRP3, PTK2B, SLAMF6, TNFAIP8L2, OASL1, HERC6, OASL2, MB21D1, GSDMD, TICAM2, RSAD2, SP110, DDX58, CD180, TYK2, FGR, FCGR1, HCK, FER, OAS2, NAIP6, OAS3, TLR9, SH2D1B2, IRF7, SARM1, TLR11, TLR8, MASP2, TLR7, TRIM10, TLR13	707	400	18082	2.9412	4.55745e-07
459	4.Liver_CDonly	RNA-seq	Positive	GOTERM_BP_DIRECT	GO:0009615~response to virus	18	1.84805	2.07954e-08	BATF3, RSAD2, SRC, DDX58, OAS1A, DDX60, IFIT1, IFIT3, IFIT2, OAS2, OAS3, DHX58, TLR9, TLR8, DUOX2, OASL1, TLR13, OASL2	707	84	18082	5.4805	5.2507e-05
460	4.Liver_CDonly	RNA-seq	Positive	GOTERM_BP_DIRECT	GO:0006954~inflammatory response	36	3.6961	2.40362e-07	CSF1R, NLRP1A, C5AR2, CD5L, FPR1, PIK3CD, IL27, NLRC4, PLA2G7, HDAC9, PTGS1, C3AR1, NLRP3, TNFRSF8, CCR5, GM10591, GSDMD, GBP5, CD163, TICAM2, TNFRSF18, SLC11A1, CD180, TNFRSF1B, SELP, HCK, THEMIS2, NAIP6, TLR9, TLR11, TLR8, TLR7, IL17C, IL17B, TLR13, IDO1	707	344	18082	2.67652	0.00060673
461	4.Liver_CDonly	RNA-seq	Positive	GOTERM_BP_DIRECT	GO:0007165~signal transduction	80	8.21355	1.65004e-05	NPY2R, GPR62, ARHGAP36, ARHGAP4, GRM3, ADGRE1, GRM4, CYSLTR2, C3AR1, GNRHR, PDE4A, TNFRSF8, FFAR1, CCR5, EDARADD, TICAM2, UNC5A, GPR35, ARRDC2, AVPR2, MAGI2, GPR75, TIAM2, ARHGAP10, TOM1L2, RAP2B, OLFR552, ADRB3, RASA4, ADGRB3, TLR9, TLR11, TLR8, TLR7, RHOV, TLR13, LTK, NDRG3, PKN3, C5AR2, ARHGAP19, FPR1, ADRB1, ARHGAP17, TRHDE, OLFR18, CRHR1, ARHGAP22, PROKR1, GNG3, RAB23, OLFR543, OLFR55, PLXNA…	707	1255	18082	1.63032	0.0408079
462	4.Liver_CDonly	RNA-seq	Positive	GOTERM_CC_DIRECT	GO:0016020~membrane	364	37.3717	8.25432e-12	EPHB6, ICAM5, TMEM91, ZDHHC2, CYB5D2, RNF112, PREX1, ADGRA1, C3AR1, GJA8, SLC12A8, ANKS1B, SCN1A, UNC13B, GBP5, EPHA6, RSAD2, UNC5A, SLC11A1, COG4, CACNA2D3, ENTPD8, TIMD4, MFSD11, SYTL4, TMEM80, GBGT1, TIAM2, SOAT2, ADGRB3, ADGRB1, TYRO3, KCNQ5, PRKD2, A3GALT2, CDS1, EBI3, SDC3, FPR1, LYPD2, LY9, CRHR1, CFAP126, OLFR18, TRPM2, NEU4, ATP6V0A4, SLAMF6, NCKAP1L, PCDHA9, ICOS, GM5431, STX4A, PCDHA8,…	769	6998	19662	1.32993	3.59061e-09
463	4.Liver_CDonly	RNA-seq	Positive	GOTERM_CC_DIRECT	GO:0014069~postsynaptic density	26	2.6694	7.88507e-06	CLSTN2, SRC, CAMK2A, ADD2, GRM3, RIMS1, ABLIM1, PAK1, GNG3, SIPA1L1, PTK2B, RGS20, DLGAP1, DISC1, DLGAP2, ANKS1B, HOMER1, MAGI2, SRCIN1, SYN2, DNM3, SYT11, LRFN1, ADGRB1, EXOC4, IGSF9B	769	239	19662	2.78149	0.00342414
464	4.Liver_CDonly	RNA-seq	Positive	GOTERM_CC_DIRECT	GO:0005887~integral component of plasma membrane	74	7.59754	1.4052e-05	EPHB6, NPY2R, SLC7A15, TCAM1, ICAM5, ZDHHC2, SLC8A1, GM14085, TSPAN10, GRM3, GRM4, CYSLTR2, C3AR1, GNRHR, TNFRSF8, CNGA2, SLC26A11, FFAR1, CLEC1B, TMEM150B, EPHA6, TRPC4, GPR35, TNFRSF18, SLC2A13, CD180, AVPR2, GPR75, TNFRSF1B, DCSTAMP, SLC7A7, ADRB3, TLR7, TMPRSS9, C5AR2, NPR2, KCNA2, FPR1, KCNA3, ADRB1, KCNA5, TNFRSF11A, PROKR1, TRPM2, OLFR55, PLXNA2, CLCA2, KISS1R, SLC38A6, SLAMF6, ICOS, KCNJ2…	769	1126	19662	1.68033	0.00609401
465	4.Liver_CDonly	RNA-seq	Positive	GOTERM_CC_DIRECT	GO:0030054~cell junction	52	5.33881	2.89323e-05	PTPRU, GRIK4, ESPN, PANX2, RIMS1, SIPA1L1, RIMS3, PRX, CLDN23, DLGAP1, GJA8, DLGAP2, DACT1, ANKS1B, UNC13B, DDX58, MAGI2, SRCIN1, SYN2, HCK, GJD4, BIN2, DOK7, VAMP1, PKP1, LCP1, HAP1, PKP3, CTBP2, CAMK2A, KCNA2, ARHGAP17, PAK1, CLCA2, PTK2B, CHRNA10, DISC1, PLXNA3, LRRC4B, FARP1, HOMER1, GABRA4, LGI3, GAD2, SDK1, FER, SYT11, GJB3, LRFN1, SARM1, IGSF9B, FERMT3	769	718	19662	1.85174	0.0125069
466	4.Liver_CDonly	RNA-seq	Positive	GOTERM_MF_DIRECT	GO:0001730~2'-5'-oligoadenylate synthetase activity	9	0.924025	7.8797e-10	OAS1H, OAS2, OAS3, OAS1A, OAS1D, OAS1E, OASL1, OAS1G, OASL2	684	11	17446	20.8684	6.2092e-07
467	4.Liver_CDonly	RNA-seq	Positive	GOTERM_MF_DIRECT	GO:0003725~double-stranded RNA binding	15	1.54004	4.4086e-07	OAS1H, DDX58, OAS1A, DDX60, OAS1D, OAS1E, OAS1G, OAS2, OAS3, DHX58, TLR8, TLR7, OASL1, TLR13, OASL2	684	70	17446	5.46554	0.000347338
468	4.Liver_CDonly	RNA-seq	Positive	GOTERM_MF_DIRECT	GO:0005524~ATP binding	95	9.75359	3.66679e-06	EPHB6, LRGUK, PRKAG1, PIK3CD, AATK, STKLD1, PFAS, HK2, ABCA14, HK3, GM4567, KIF5C, PIP5KL1, GSG2, RPS6KA1, KIF5A, DHX58, NEK3, KIF1A, OASL1, OASL2, MB21D1, TOR3A, CDKL3, EPHA6, DDX58, STRADA, DDX56, TAP2, ENTPD8, DARS2, TAP1, VRK2, TYK2, E230025N22RIK, KSR2, SYN2, CIT, FGR, HCK, KIF9, BC030499, KIFC1, NAIP6, NME7, OAS2, OAS3, TYRO3, TSSK5, MCM4, PRKD2, KIF2C, ABCG3, ANKK1, GM8994, NAIP1, TOR4A, O…	684	1507	17446	1.60787	0.00288527
469	4.Liver_CDonly	RNA-seq	Positive	UP_TISSUE	Spleen	72	7.3922	5.78096e-05	ALAS2, 1700028N14RIK, PIK3CD, CLEC9A, ESM1, RPS6KA1, GJA8, CLEC1B, CCR5, OASL2, APOBEC1, TOR3A, TNFRSF18, VRK2, TYK2, VAV1, HCK, ADRB3, RASA4, NAIP6, BANK1, G6PDX, TFEC, SLC9A9, IRF7, MCM4, TLR8, AIDA, ABCG3, TRIM10, NAIP1, CHST3, PIRA2, UNC93B1, UHRF1, NPR2, ALOX15, NLRC4, BTNL10, PIRB, LY9, PLA2G7, FGD2, ADD2, TMEM26, SERPINB1C, EXOSC9, FIGNL1, UCP2, TNFRSF17, ATP6V0A4, SLAMF6, ICOS, LRRC25, CL…	816	1214	22371	1.62596	0.0108669

## Sheet: 12c
Supplementary file 12c. Functional enrichment among gene expression correlates of liver interventional clock (liver int.EAA)
Enriched gene ontology, KEGG pathways, tissue expression; Mus musculus genome as background and gene symbol as identifier
Tissue and assay: (1) liver RNA-seq, (2) liver proteome, (3) adipose proteome
Analysis performed on DAVID (2021 update version): https://david.ncifcrf.gov/home.jsp
Index	Tissue	Assay	CorrelationDirection	Category	Term	Count	%	PValue	Genes	List Total	Pop Hits	Pop Total	Fold Enrichment	Bonferroni
1	1.Liver	RNA-seq	Negative	GOTERM_BP_DIRECT	GO:0006412~translation	51	23.0769	9.75482e-40	RPL32, RPL31, RPL10A, RPL8, RPL9, RPL6, RPS15, RPL7A, RPS17, RPS16, RPL18A, RPS19, RPL36, RPL35, RPS11, RPS13, RPS9, RPS8, RPS5, RPS6, MRPL47, EEF1A1, EEF1D, RPL37A, RPL24, KXD1, UBA52, RPL28, RPL10, RPL12, RPL11, MRPL12, MRPL55, RPL14, RPL13, RPS2, RPL18, RPS27A, RPL17, RPL19, RPL41, RPL35A, RPL23A, RPS26, EIF3I, RPL27A, EIF3H, RPS20, FAU, RPS24, RPS23	190	401	18082	12.1037	6.94544e-37
2	1.Liver	RNA-seq	Negative	GOTERM_BP_DIRECT	GO:0055114~oxidation-reduction process	31	14.0271	1.93209e-11	NDUFB9, NDUFB8, NDUFA11, NDUFB11, NDUFB5, UQCR11, UQCR10, CYP3A59, UQCRH, CYP2C39, TXN2, HSD11B1, SPR, OGFOD2, UQCRFS1, NDUFV3, VKORC1, NDUFA9, CYB5A, CBR1, NDUFA5, NDUFA4, NDUFA2, FMO3, SDHB, CYP2C29, SOD1, NDUFS7, NDUFS6, AKR1C13, NDUFS3	190	676	18082	4.36423	1.37565e-08
3	1.Liver	RNA-seq	Negative	GOTERM_BP_DIRECT	GO:0006364~rRNA processing	13	5.88235	8.26347e-09	POP5, IMP3, RPS6, RPL11, RPL35A, RPS15, RPS17, EMG1, RPS16, RPS19, MRTO4, RPL14, RPS24	190	126	18082	9.81896	5.88357e-06
4	1.Liver	RNA-seq	Negative	GOTERM_BP_DIRECT	GO:0000028~ribosomal small subunit assembly	7	3.16742	5.73634e-08	RPS15, RPS25, RPS17, RPS19, RPS5, RPS2, RPS10	190	21	18082	31.7228	4.08419e-05
5	1.Liver	RNA-seq	Negative	GOTERM_BP_DIRECT	GO:0000027~ribosomal large subunit assembly	7	3.16742	2.33026e-07	RPL10, RPL12, RPL11, MRTO4, RPL24, RPL23A, RPL6	190	26	18082	25.6223	0.0001659
6	1.Liver	RNA-seq	Negative	GOTERM_BP_DIRECT	GO:0042274~ribosomal small subunit biogenesis	6	2.71493	1.22161e-06	RPS15, RPS17, RPS16, RPS19, RPS6, RPS24	190	19	18082	30.0532	0.00086941
7	1.Liver	RNA-seq	Negative	GOTERM_BP_DIRECT	GO:0002181~cytoplasmic translation	7	3.16742	1.26984e-06	RPL31, RPLP1, RPL36, RPL35A, RPL8, RPL9, RPL6	190	34	18082	19.5935	0.000903721
8	1.Liver	RNA-seq	Negative	GOTERM_BP_DIRECT	GO:0015986~ATP synthesis coupled proton transport	6	2.71493	3.41703e-06	ATP5D, ATP5C1, ATP5H, ATP5O, ATP5G2, ATP5F1	190	23	18082	24.8265	0.00242997
9	1.Liver	RNA-seq	Negative	GOTERM_BP_DIRECT	GO:0006810~transport	40	18.0995	1.06684e-05	NDUFB9, NDUFB8, NDUFA11, NDUFB11, NDUFB5, SLC35D2, ATP5C1, UQCR11, UQCR10, ATP5H, ATP5G2, ATP5O, OAZ1, UQCRH, TIMM50, TXN2, APOM, ATP5D, UQCRFS1, TIMM17B, NDUFV3, RILP, AP5S1, NDUFA9, CYB5A, STARD5, TRAPPC2L, MTX1, NDUFA5, NDUFA4, NDUFA2, STARD10, ATP5F1, SDHB, VAMP8, NDUFS7, NDUFS6, NDUFS3, TMEM9, RAB17	190	1822	18082	2.08932	0.00756717
10	1.Liver	RNA-seq	Negative	GOTERM_BP_DIRECT	GO:0046677~response to antibiotic	6	2.71493	1.61224e-05	VKORC1, ENDOG, ID1, UQCRFS1, ZC3H8, SOD1	190	31	18082	18.4197	0.0114136
11	1.Liver	RNA-seq	Negative	GOTERM_CC_DIRECT	GO:0005840~ribosome	51	23.0769	4.09102e-57	RPL32, RPL31, RPLP1, RPL10A, RPL8, RPL9, RPL6, RPS15, RPL7A, RPS17, RPS16, RPL18A, RPS19, RPL36, RPS11, RPS10, RPS13, RPS9, RPS8, RPS5, RPS6, MRPL47, RPL37A, RPL24, KXD1, UBA52, RPL28, MRPS35, RPL10, RPL12, RPL11, MRPL12, MRPL55, RPL14, RPL13, RPS2, RPL18, RPS27A, RPL17, RPL19, RPL41, MRPL28, RPL35A, RPL23A, RPS26, RPS25, RPL27A, RPS20, FAU, RPS24, RPS23	205	188	19662	26.0187	8.8366e-55
12	1.Liver	RNA-seq	Negative	GOTERM_CC_DIRECT	GO:0030529~intracellular ribonucleoprotein complex	47	21.267	2.63868e-39	MRPS35, RPL32, RPL31, RPL12, RPLP1, RPL11, RPL8, MRPL12, RPL10A, RPL9, RPL6, MRPL55, RPS15, RPL7A, RPS17, RPS16, RPL18A, RPS19, RPL36, RPL14, RPL13, RPS2, SNRPD3, RPS11, RPS27A, RPL18, RPS10, RPL17, RPS13, RPL19, RPS9, RPS8, IMP3, RPS5, RPS6, MRPL28, RPL35A, RPL23A, MRPL47, RPS25, RPL27A, RPL37A, RPL24, RPS20, RPL28, RPS24, RPS23	205	320	19662	14.0871	5.69955e-37
13	1.Liver	RNA-seq	Negative	GOTERM_CC_DIRECT	GO:0022625~cytosolic large ribosomal subunit	26	11.7647	4.81218e-29	RPL10, RPL32, RPL31, RPL12, RPLP1, RPL11, RPL8, RPL10A, RPL9, RPL6, RPL7A, RPL18A, RPL36, RPL14, RPL13, RPL35, RPL18, RPL17, RPL19, RPL35A, RPL23A, RPL27A, RPL37A, RPL24, RPL28, UBA52	205	91	19662	27.4035	1.03943e-26
14	1.Liver	RNA-seq	Negative	GOTERM_CC_DIRECT	GO:0022627~cytosolic small ribosomal subunit	19	8.59729	4.18392e-23	RPS9, RPS8, RPS5, RPS6, RPS26, RPS15, RPS25, RPS17, RPS16, RPS19, RPS20, RPS2, FAU, RPS11, RPS27A, RPS10, RPS13, RPS24, RPS23	205	53	19662	34.3836	9.03727e-21
15	1.Liver	RNA-seq	Negative	GOTERM_CC_DIRECT	GO:0005739~mitochondrion	64	28.9593	1.03275e-19	NDUFA11, COX4I1, ATP5C1, RPL10A, ATP5G2, TXN2, HEBP1, HINT2, SPR, CHCHD7, CDK5RAP1, UQCRFS1, TIMM17B, ATP5SL, URAH, STARD5, ENDOG, PAM16, MRPL47, HOGA1, ATP5F1, SDHB, GCAT, VAMP8, HAX1, NDUFS7, NDUFS6, FKBP8, NDUFS3, JTB, ALDOC, NDUFB9, NDUFB8, MRPS35, NDUFB11, NDUFB5, UQCR11, UQCR10, ATP5H, ATP5O, MRPL12, COX5A, UQCRH, MRPL55, TIMM50, MYG1, BAG1, ATP5D, NDUFV3, RILP, NDUFA9, CYB5A, MTX1, NDUFA5,…	205	1721	19662	3.56675	2.23074e-17
16	1.Liver	RNA-seq	Negative	GOTERM_CC_DIRECT	GO:0070469~respiratory chain	17	7.69231	5.29415e-19	NDUFA9, NDUFB9, NDUFB8, NDUFA5, NDUFA11, NDUFB11, NDUFA4, NDUFB5, NDUFA2, UQCR11, UQCR10, UQCRH, NDUFS7, NDUFS6, NDUFS3, UQCRFS1, NDUFV3	205	58	19662	28.1122	1.14354e-16
17	1.Liver	RNA-seq	Negative	GOTERM_CC_DIRECT	GO:0005743~mitochondrial inner membrane	32	14.4796	7.07649e-19	NDUFB9, NDUFB8, NDUFA11, NDUFB11, NDUFB5, COX4I1, ATP5C1, UQCR11, UQCR10, ATP5H, ATP5O, COX5A, UQCRH, TIMM50, ATP5D, UQCRFS1, TIMM17B, NDUFV3, NDUFA9, MTX1, NDUFA5, NDUFA4, NDUFA2, PAM16, COX6C, ATP5F1, SDHB, GCAT, NDUFS7, CAPN10, NDUFS6, NDUFS3	205	387	19662	7.93072	1.52852e-16
18	1.Liver	RNA-seq	Negative	GOTERM_CC_DIRECT	GO:0015935~small ribosomal subunit	13	5.88235	4.9303e-17	RPS9, RPS5, RPS6, RPS26, RPS15, RPS25, RPS16, RPS20, RPS2, FAU, RPS27A, RPS24, RPS23	205	29	19662	42.9951	1.06494e-14
19	1.Liver	RNA-seq	Negative	GOTERM_CC_DIRECT	GO:0005747~mitochondrial respiratory chain complex I	13	5.88235	4.26993e-14	NDUFA9, NDUFB9, NDUFB8, NDUFA5, NDUFA11, NDUFB11, NDUFA4, NDUFB5, NDUFA2, NDUFS7, NDUFS6, NDUFS3, NDUFV3	205	47	19662	26.5289	9.23261e-12
20	1.Liver	RNA-seq	Negative	GOTERM_CC_DIRECT	GO:0070062~extracellular exosome	66	29.8643	1.31886e-11	RPL31, COX4I1, ATP5C1, RPL10A, HEBP1, VMO1, RPL7A, HINT1, RPS17, RPS16, SPR, RPS19, CTSH, SNRPD3, RPS11, RPS10, NUDT14, RPS13, UBXN6, CBR1, RPS9, RPS8, RPS5, IGFBP2, MIF, HOGA1, ATP5F1, SDHB, UPB1, APRT, VAMP8, EEF1A1, RPL37A, RPL24, ALDOC, RPL28, PFN2, NDUFB9, MGST3, RPL12, RPL11, GSTT2, UQCR10, ATP5H, ATP5O, COX5A, MYG1, APOM, MIEN1, RPL14, RPS2, RPS27A, CYB5A, NDUFA4, RPL35A, BC029214, SOD1, A…	205	2674	19662	2.36732	2.84873e-09
21	1.Liver	RNA-seq	Negative	GOTERM_CC_DIRECT	GO:0005925~focal adhesion	21	9.50226	4.98728e-09	RPS9, RPL31, RPS8, RPS5, RPL12, RPL8, RPL10A, RPL9, RPL6, RPS15, RPL7A, RPS17, RPS16, RPS19, RPL37A, RPS2, RPS11, RPL18, RPS10, RPS13, RPL19	205	391	19662	5.15129	1.07725e-06
22	1.Liver	RNA-seq	Negative	GOTERM_CC_DIRECT	GO:0005730~nucleolus	30	13.5747	1.37345e-08	RPL31, RPL12, RPL11, RPL8, RPL10A, RPL9, RPL6, TXN2, RPL7A, EMG1, HINT2, RPS19, RPL36, RPS11, RPS27A, POLR2I, RPL18, RPS10, RPS13, RPL19, RPS9, NAA10, IMP3, RPS6, RPS26, EEF1A1, RPS25, EEF1D, MRTO4, RPS23	205	842	19662	3.4173	2.96665e-06
23	1.Liver	RNA-seq	Negative	GOTERM_CC_DIRECT	GO:0031012~extracellular matrix	15	6.78733	2.5279e-06	RPS5, RPL12, RPL11, RPL35A, ATP5O, RPL9, SOD1, RPS25, RPS17, RPS16, RPS19, RPS20, RPS11, RPS10, RPS13	205	294	19662	4.89348	0.000545879
24	1.Liver	RNA-seq	Negative	GOTERM_CC_DIRECT	GO:0016020~membrane	105	47.5113	4.37224e-06	RPL32, NDUFA11, RPL31, ATP5C1, RPL8, RPL10A, RPL9, RPL6, PDCD2L, RPS15, RPS17, RPS16, RPL18A, RPS19, RPL36, RPL35, RPS11, RPS10, AP5S1, RPS13, RPS9, RPS8, RPS5, RPS6, SDHB, EEF1A1, 1810037I17RIK, FKBP8, MAL, RPL24, JTB, RPL28, NDUFB11, MGST3, SLC35D2, ATP5H, ATP5O, UQCRH, CRHR2, TIMM50, HSD11B1, ATP5D, NDUFV3, B3GALNT1, STARD10, CYP2C29, RPS26, RPL27A, PEMT, RPS20, RNF186, RPS24, RPS23, COX4I1, A…	205	6998	19662	1.43909	0.00094396
25	1.Liver	RNA-seq	Negative	GOTERM_CC_DIRECT	GO:0043209~myelin sheath	12	5.42986	5.45677e-06	EEF1A1, NDUFS3, UQCRFS1, ATP5C1, MIF, ATP5H, ATP5O, RPS27A, ATP5F1, COX5A, UBA52, SOD1	205	192	19662	5.99451	0.00117797
26	1.Liver	RNA-seq	Negative	GOTERM_CC_DIRECT	GO:0005622~intracellular	37	16.7421	7.77663e-06	RPL32, RPL31, RPLP1, RPL11, RPL8, MRPL12, RPL9, RPL6, HINT1, RPS17, RPS19, RPL36, RPL14, RPL13, RPS11, RPL18, RPL17, RPS13, RPL19, RPS9, TRAPPC2L, NAA10, RPS8, IMP3, RPL35A, RPL23A, CAPN11, CAPN10, RPL27A, RPL37A, MRTO4, RPS20, RAB17, RPL28, UBA52, RPS24, RPS23	205	1599	19662	2.21936	0.00167835
27	1.Liver	RNA-seq	Negative	GOTERM_CC_DIRECT	GO:0005753~mitochondrial proton-transporting ATP synthase complex	5	2.26244	3.07203e-05	ATP5D, ATP5C1, ATP5H, ATP5O, ATP5F1	205	18	19662	26.6423	0.00661371
28	1.Liver	RNA-seq	Negative	GOTERM_CC_DIRECT	GO:0000276~mitochondrial proton-transporting ATP synthase complex, coupling factor F(o)	4	1.80995	0.000225971	ATP5H, ATP5O, ATP5G2, ATP5F1	205	12	19662	31.9707	0.047643
29	1.Liver	RNA-seq	Negative	GOTERM_MF_DIRECT	GO:0003735~structural constituent of ribosome	51	23.0769	1.51078e-49	RPL32, RPL31, RPLP1, RPL10A, RPL8, RPL9, RPL6, RPS15, RPS17, RPS16, RPL18A, RPS19, RPL36, RPL35, RPS11, RPS10, RPS13, RPS9, RPS8, RPS5, RPS6, MRPL47, RPL37A, RPL24, KXD1, UBA52, RPL28, MRPS35, RPL10, RPL12, RPL11, MRPL12, MRPL55, RPL14, RPL13, RPS2, RPL18, RPS27A, RPL17, RPL19, RPL41, MRPL28, RPL35A, RPL23A, RPS26, RPS25, RPL27A, RPS20, FAU, RPS24, RPS23	181	264	17446	18.6202	4.2453e-47
30	1.Liver	RNA-seq	Negative	GOTERM_MF_DIRECT	GO:0044822~poly(A) RNA binding	51	23.0769	1.66305e-19	RPL32, RPL31, ATP5C1, ZC3H8, RPL10A, RPL8, RPL6, RPS15, RPL7A, RPS17, RPS16, RPL18A, RPS19, RPL36, RPL35, SNRPD3, RPS11, RPS10, RPS13, RPS9, RPS8, IMP3, RPS5, RPS6, EEF1A1, RPL37A, MRTO4, RPL24, RPL28, MRPS35, RPL10, RPL12, RPL11, EMG1, RPL14, RPL13, RPS2, NDUFV3, RPS27A, RPL17, RPL19, MRPL28, RPL35A, RPS26, RPS25, RPL27A, EIF3H, RPS20, FAU, RPS24, RPS23	181	1113	17446	4.41664	4.67317e-17
31	1.Liver	RNA-seq	Negative	GOTERM_MF_DIRECT	GO:0019843~rRNA binding	10	4.52489	1.28631e-09	EMG1, RPS9, IMP3, RPS5, RPL12, RPL11, RPL23A, RPL8, RPS11, RPL9	181	48	17446	20.0806	3.61453e-07
[truncated: 428 more rows]

## Sheet: 12d
Supplementary file 12d. Top 2000 liver proteome correlates of liver int.EAA and pan-tissue EAA
[truncated: 2,762 more rows]
