# Supplementary material for: Genetic loci and metabolic states associated with murine epigenetic aging
Source: eLife. 2022 Apr 7;11:e75244. doi: 10.7554/eLife.75244 (PMC9049972; doi:10.7554/eLife.75244)
Supplement: Supplementary file 13. [file elife-75244-supp13.xlsx]

## Sheet: Sheet1
Supplementary file 13. Data access
The BXD epigenetic, lifespan, metabolic, body weight, and cofactors used in the present study can be accessed from http://genenetwork.org
In the GeneNetwork homepage, select the following from the dropdown menus and retreive the data using the Record IDs:
Group: BXD NIA Longevity Study
Type: Traits and Cofactors*
Dataset: BXD-Longevity Phenotypes
Index	Record ID	Symbol	Description	Primary publication(s) for citation
1	10001	AgeAtDeath	Aging, metabolism: Age at death, natural or sacrificed [days]	Roy et al. 2021 (PMID: 34552269); Williams et al., 2021 (PMID: 34666007)
2	10002	Lifespan	Aging, metabolism: Lifespan, longevity (values exclude accidental deaths or cases sacrificed for tissue collection) [days]	Roy et al. 2021 (PMID: 34552269)
3	10003	Body_6M	Aging, metabolism, morphology: Body weight at 6 months of age [g]	Roy et al. 2021 (PMID: 34552269)
4	10004	Body_12M	Aging, metabolism, morphology: Body weight at 12 months of age [g]	Roy et al. 2021 (PMID: 34552269)
5	10005	Body_18M	Aging, metabolism, morphology: Body weight at 18 months of age [g]	Roy et al. 2021 (PMID: 34552269)
6	10006	Body_24M	Aging, metabolism, morphology: Body weight at 24 months of age [g]	Roy et al. 2021 (PMID: 34552269)
7	10010	Sex	Cofactor, metadata: Sex, where female = 1 and male = 0 [Sex]
8	10011	Diet	Cofactor, metadata: Diet, 0 = low fat standard chow diet (CD, 6% calories from fat), 1 = high fat lard diet (HFD, 60% calories from fat) [ordinal]
9	10021	Body_Sac	Aging, metabolism, morphology: Body weight at death for individuals sacrificed for tissues and biobanking [g]	Williams et al., 2021 (PMID: 34666007)
10	10022	Glucose	Aging, metabolism: Serum fasting glucose [mmol/L] _x000D_	Williams et al., 2021 (PMID: 34666007)
11	10025	TotalCholesterol	Aging, metabolism: Serum total cholesterol [mmol/L]	Williams et al., 2021 (PMID: 34666007)
12	10066	Weight00Baseline	Aging, metabolism, morphology: Baseline body weight before 6 months of age [g]	Roy et al. 2021 (PMID: 34552269)
13	10071	EAA_pan	Aging, metabolism, life span: Epigenetic age acceleration, unbiased mouse pan-tissue clock [year]	current
14	10072	EAA_liver	Aging, metabolism, life span: Epigenetic age acceleration, unbiased mouse liver clock [year]	current
15	10073	dev_EAA_pan	Aging, metabolism, life span: Epigenetic age acceleration, unbiased mouse pan-tissue developmental clock [year]	current
16	10074	dev_EAA_liver	Aging, metabolism, life span: Epigenetic age acceleration, unbiased mouse liver developmental clock [year]	current
17	10075	int_EAA_pan	Aging, metabolism, life span: Epigenetic age acceleration, unbiased mouse pan-tissue interventional clock [year]	current
18	10076	int_EAA_liver	Aging, metabolism, life span: Epigenetic age acceleration, unbiased mouse liver interventional clock [year]	current
19	10093	Entropy27966CpG_20bins	Aging, metabolism, morphology: methylome-wide entropy (20 bins discretized)	current
