# Supplementary figures and images for: Genetic loci and metabolic states associated with murine epigenetic aging
Source: eLife journal article supplement (doi:10.7554/elife.75244), 2022-04-07

**a** Liver transcriptome

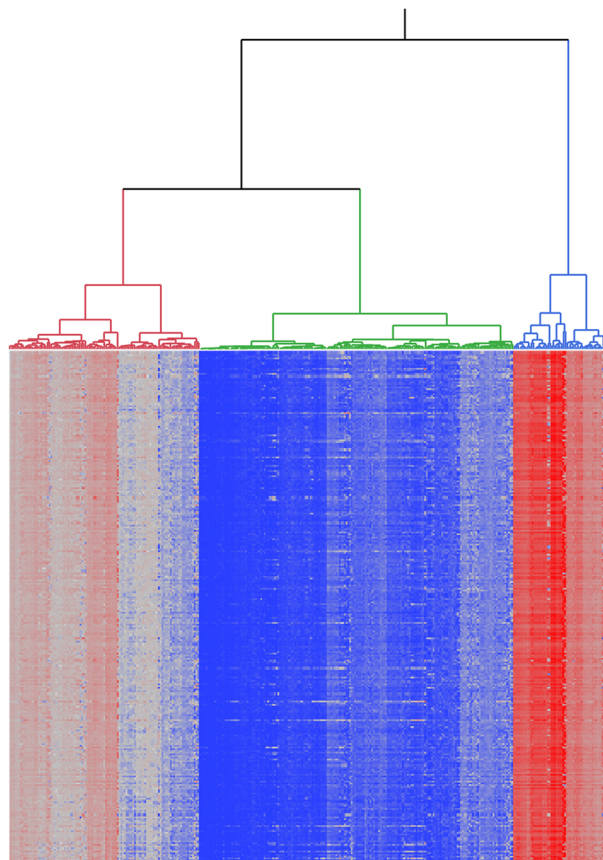

**b** Liver proteome

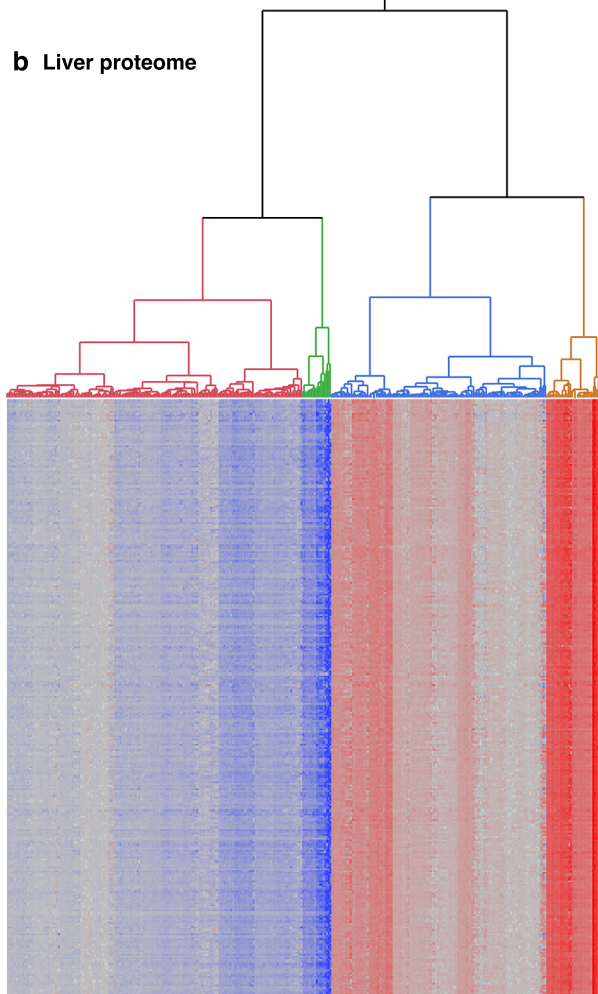

Supplement: supp [file elife-75244-supp-v1.zip]

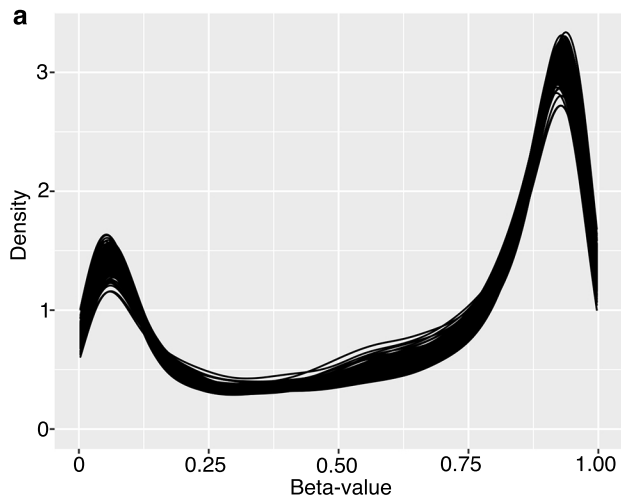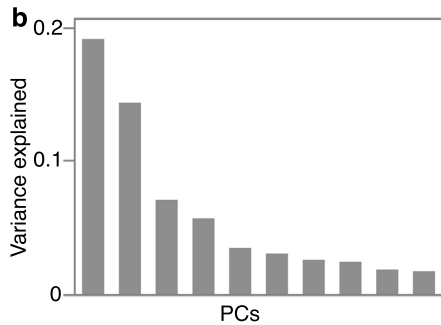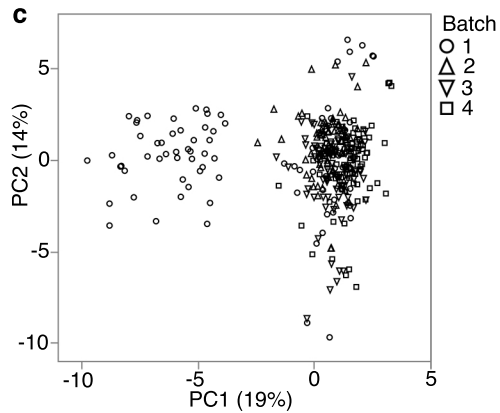

Supplement: supp [file elife-75244-supp-v1.zip]

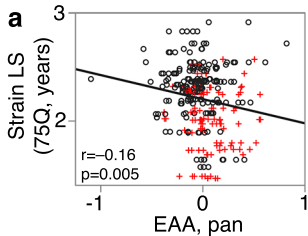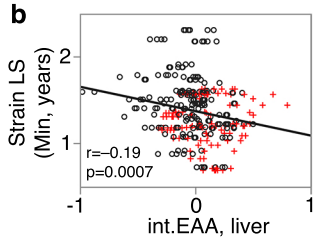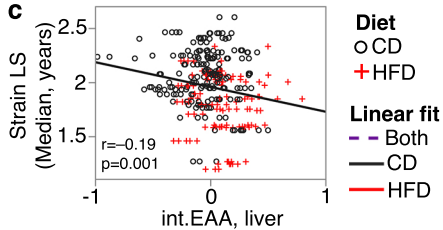

Supplement: supp [file elife-75244-supp-v1.zip]

**a**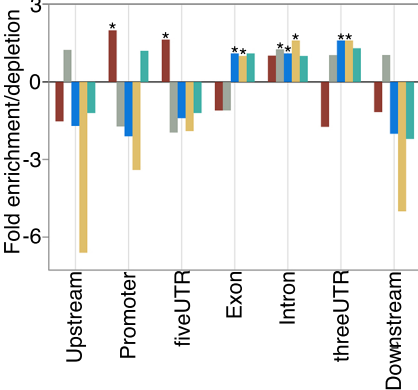**b**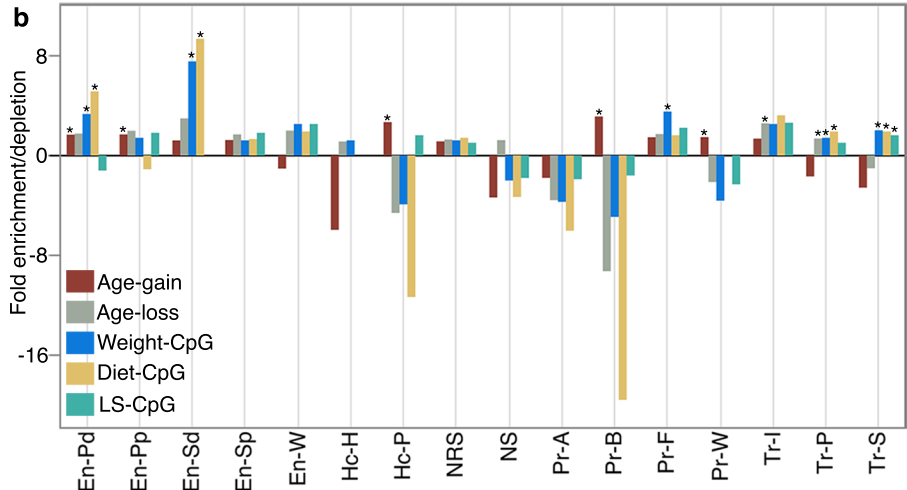**c**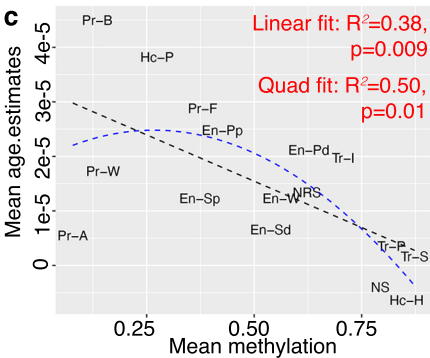**d**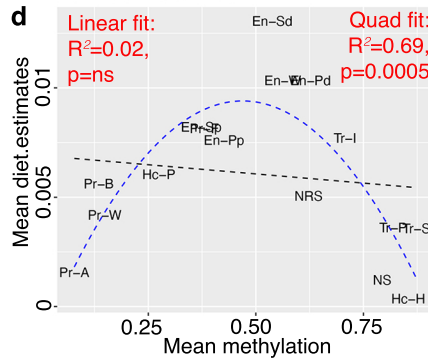**e**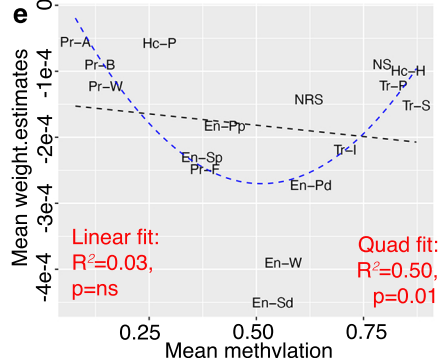

Supplement: supp [file elife-75244-supp-v1.zip]

# Variance source for EAA

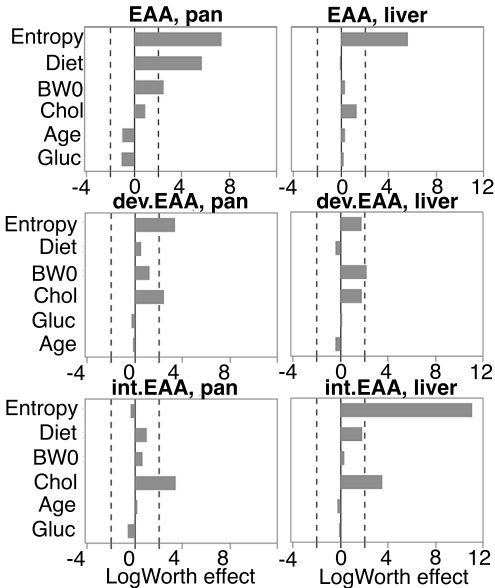

Supplement: supp [file elife-75244-supp-v1.zip]

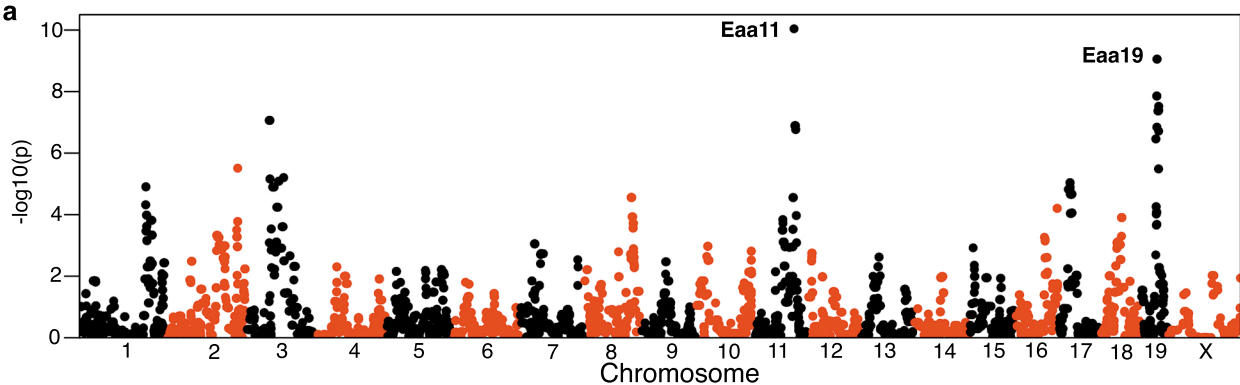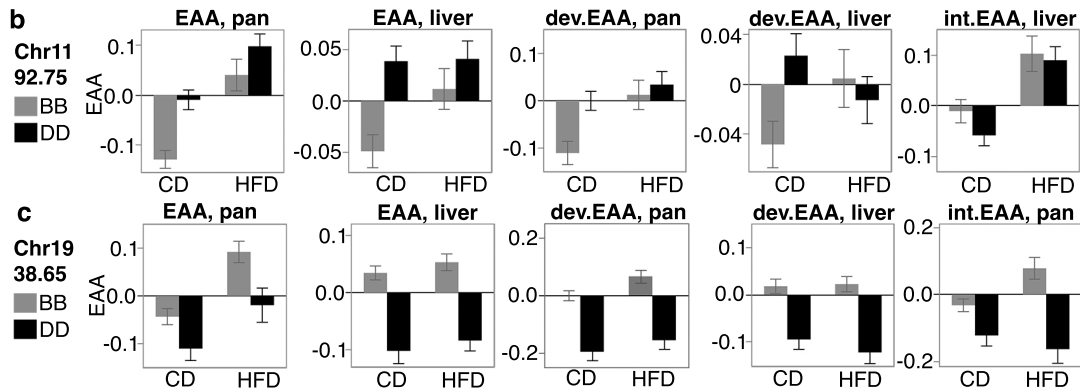

Supplement: supp [file elife-75244-supp-v1.zip]
